# Supplementary material
Source: publisher figshare collection journal article supplement (https://tandf.figshare.com/articles/dataset/_/6002054)
Supplement: Supplementary file 1 [file 2]

Archive with 5 entries (5 files):
- Salunkhe et al Table S1 Nov17.xlsx
- Salunkhe et al Table S2 Nov17.xlsx
- Salunkhe et al Table S3 Nov17.xlsx
- Salunkhe et al Table S4 Platelets N_5.xlsx
- Salunkhe_et_al_Supporting_Material_Nov_2017_1_.pdf
