# Supplementary material
Source: publisher figshare collection journal article supplement (https://tandf.figshare.com/articles/dataset/_/6002054)
Supplement: Supplementary file 1 [file 2 › Salunkhe et al Table S1 Nov17.xlsx]

## Sheet: Salunkhe et al Table S1
Supplementary Table 2: Proteomic Analysis of Control vs Mirasol PC Lysates through Storage
Indicated are the Average Log2 LFQ in Control and Mirasol PCs samples at Days 2, 6 and 8 of Storage, Log2 LFQ fold ratios Mirasol vs Control at different Days, FDR (T test),
Multiple Sample test ANOVA significant entries and corresponding FDR, and the individual Log2 LFQ values on individual Control and Mirasol Samples.
LFQ = Label Free Quantification; FDR = false discovery rate; C = Control; M = Mirasol, D = Day.
			Average Log2 LFQ							Log2 LFQ Ratio and T test									ANOVA			Log2 LFQ
Gene Symbol	Description	Majority protein IDs	C D2	C D6	C D8	M D2	M D6	M D8		M vs C D2	FDR		M vs C D6	FDR		M vs C D8	FDR		Significant	FDR		C D2 1	C D2 2	C D2 3	C D6 1	C D6 2	C D6 3	C D8 1	C D8 2	C D8 3	M D2 1	M D2 2	M D2 3	M D2 4	M D6 1	M D6 2	M D6 3	M D6 4	M D8 1	M D8 2	M D8 3	M D8 4
A1BG	Alpha-1B-glycoprotein	P04217;P04217-2	27.7239	27.4965	27.5977	27.4427	27.4336	27.1715		-0.281219	0.78556		-0.0629336	0.911233		-0.426252	0.527736			0.365911		27.6251	27.7325	27.8142	27.6527	27.3662	27.4707	27.3494	27.7708	27.673	27.6595	27.509	27.2445	27.3578	27.4785	27.1795	27.4938	27.5826	27.0084	27.217	26.9977	27.4629
A2M	Alpha-2-macroglobulin	H0YGH4;P01023	27.094	26.6688	26.0279	27.5792	27.6974	27.5663		0.485205	0.923824		1.02859	0.270961		1.53847	0.364739			0.678588		27.632	26.433	27.217	26.8858	26.3187	26.8019	25.2678	26.6458	26.17	26.53	30.1724	26.5433	27.0711	27.6865	27.8973	27.5463	27.6595	27.2891	27.9372	27.3066	27.7325
AAMDC	Mth938 domain-containing protein	E9PR47;Q9H7C9;E9PNP3;E9PIQ4	25.1279	24.0996	24.4448	24.6909	24.1006	23.2824		-0.437002	0.891807		0.000995	1		-1.16237	0.799032			0.866529		24.9847	24.8528	25.5463	24.867	25.1946	22.2372	24.8997	24.9628	23.4719	25.1371	23.2672	25.1095	25.2499	23.9115	24.7234	22.8092	24.9584	23.1687	20.8958	25.0854	23.9799
AARS	Alanine--tRNA ligase, cytoplasmic	P49588	29.9677	30.0349	30.1924	29.9732	30.0065	30.0705		0.00546519	0.979473		-0.0284209	0.957958		-0.121944	0.728942			0.629692		29.9814	29.9677	29.9539	30.0084	29.8887	30.2077	30.2077	30.0608	30.3088	29.9117	30.0084	30.0608	29.9117	30.0864	29.94	30.0737	29.9259	29.94	30.0479	30.0864	30.2077
AASDHPPT	L-aminoadipate-semialdehyde dehydrogenase-phosphopantetheinyl transferase	Q9NRN7;E9PNF3;E9PLW6	26.0113	25.6955	25.8619	25.9579	25.961	25.8268		-0.0533935	0.957506		0.265566	0.820859		-0.035141	0.965057			0.927972		25.9089	26.1253	25.9998	25.4583	25.6348	25.9933	25.7234	25.7312	26.1312	25.5783	26.0854	26.3393	25.8288	26.0793	25.6458	26.2926	25.8264	25.7771	26.0062	25.3712	26.1527
ABCC4	Multidrug resistance-associated protein 4	O15439-2;O15439;B7Z3Q7;O15439-3	25.6939	25.6018	25.9802	24.6794	24.5572	24.8413		-1.01453	0.817623		-1.04466	0.707964		-1.13883	0.647794			0.680869		25.8457	25.6096	25.6264	25.5492	25.5725	25.6838	25.7645	26.2445	25.9316	24.7129	23.016	24.8811	26.1075	24.9089	24.9495	23.3013	25.0691	25.2571	23.344	25.4266	25.3376
ABCD3	ATP-binding cassette sub-family D member 3	F5GYC1;E7EUE1;P28288-2;P28288	23.9963	23.6996	23.4475	23.4278	23.7319	23.6799		-0.568447	0.848927		0.0323698	0.989573		0.232376	0.899081			0.96088		23.886	23.9933	24.1095	23.5983	23.5869	23.9134	23.8273	24.0105	22.5048	23.6097	23.2078	22.3242	24.5696	24.0608	22.7551	23.8583	24.2535	23.7182	23.2055	23.9225	23.8735
ABCE1	ATP-binding cassette sub-family E member 1	P61221;D6R9I9;D6RGF4	28.0379	28.048	28.1298	28.076	28.0447	28.1534		0.0381808	0.909241		-0.00330639	0.991098		0.023623	0.955257			0.865766		28.0505	27.9869	28.0762	28.0762	27.9814	28.0864	28.267	27.9814	28.141	27.9259	28.0914	28.1556	28.1312	28.0243	28.0243	28.1164	28.0137	28.003	28.249	28.1263	28.2354
ABCF1	ATP-binding cassette sub-family F member 1	Q8NE71-2;Q8NE71;H0YGW7	26.1383	25.8926	25.8695	26.0124	26.0961	26.0134		-0.125858	0.871413		0.203448	0.810192		0.143941	0.761374			0.849289		25.9428	26.2944	26.1776	25.558	25.9672	26.1527	25.6944	26.1194	25.7945	25.9998	26.2996	25.8973	25.8528	26.0505	26.1661	26.17	25.9977	26.0062	26.0547	26.0793	25.9134
ABHD10	Mycophenolic acid acyl-glucuronide esterase, mitochondrial	Q9NUJ1;B7Z6A8	25.7875	25.8435	26.317	26.5894	26.9634	26.519		0.801918	0.815446		1.11986	0.476351		0.202018	0.896124			0.551263		25.6838	25.6513	26.0275	26.512	25.4488	25.5696	26.5195	26.632	25.7995	25.8385	26.2445	26.5359	27.7389	26.8858	26.7895	26.9428	27.2354	26.8264	26.6595	25.7518	26.8385
ABHD11	Alpha/beta hydrolase domain-containing protein 11	Q8NFV4-4;Q8NFV4;H7BYM8	26.9863	27.0275	27.2681	27.1089	27.2948	27.2652		0.122668	0.923393		0.267217	0.84229		-0.00289011	0.999718			0.929384		27.0296	26.9977	26.9316	27.5165	26.9202	26.6458	27.0608	27.632	27.1115	27.0505	26.9869	26.6595	27.7389	27.7064	27.2077	27.2354	27.0296	27.4473	27.189	26.8858	27.5389
ABHD14B	Alpha/beta hydrolase domain-containing protein 14B	B4DNR3;Q96IU4;F8W9U3;B4DQI4	29.2688	29.3135	29.3191	29.6018	29.6459	29.6305		0.333005	0.773665		0.332386	0.3576		0.311386	0.335928			0.196137		29.2869	29.3662	29.1532	29.3217	29.1795	29.4394	29.3452	29.2376	29.3745	29.8142	29.7437	29.5934	29.2557	29.7389	29.6268	29.6389	29.579	29.4862	29.7341	29.6355	29.6663
ABHD16A	Abhydrolase domain-containing protein 16A	O95870;O95870-2;F6WSP1	26.8747	27.1169	27.5103	26.3866	26.8559	26.8704		-0.488121	0.846787		-0.260988	0.756915		-0.63989	0.347969			0.390933		26.673	27.0084	26.9428	26.9539	27.1984	27.1984	27.2445	27.4785	27.8081	26.1194	25.9225	26.0338	27.4707	27.1214	26.6181	26.6865	26.9977	26.8142	26.7389	26.9202	27.0084
ABHD4	Abhydrolase domain-containing protein 4	F5H6T0;B4DDH7;Q8TB40;F5GZC9;H0YFD5;F5H067	23.7183	23.8251	24.0595	23.9066	24.3456	23.953		0.188315	0.958422		0.520479	0.860125		-0.106473	0.964866			0.991255		22.9386	25.0732	23.1431	24.4551	22.8406	24.1795	24.3307	23.4114	24.4362	23.2253	24.227	23.6576	24.5165	23.8256	25.0567	23.3511	25.1488	25.0484	23.0362	24.5463	23.181
ABHD5	1-acylglycerol-3-phosphate O-acyltransferase ABHD5	Q8WTS1	24.4885	24.4604	24.7643	24.6116	24.4587	24.3905		0.123011	0.917125		-0.00169388	0.998637		-0.373776	0.648046			0.89166		24.4862	24.8385	24.141	24.2961	24.4923	24.5926	24.9361	24.6865	24.6703	24.4676	24.5926	24.3712	25.0148	24.3645	24.3376	24.275	24.8576	24.3307	24.3578	24.0691	24.8044
ABI1	Abl interactor 1	F5H1G9;F8WA55;F8WA56;A6NFN2;Q8IZP0-10;Q8IZP0-8;Q8IZP0-7;Q8IZP0-2;Q8IZP0-4;Q8IZP0-3;Q8IZP0-5;Q8IZP0-6;Q8IZP0-9;Q8IZP0;H7BXI6;Q8IZP0-11	30.2225	30.2028	30.1874	30.1884	30.3026	30.2023		-0.0341034	0.931902		0.0998391	0.912461		0.0149469	0.956785			0.989902		30.3724	30.196	30.099	29.8534	30.2535	30.5014	30.1604	30.2535	30.1483	30.099	30.1483	30.2869	30.2193	30.341	30.2077	30.5754	30.0864	30.1483	30.3303	30.2193	30.1115
ABLIM1	Actin-binding LIM protein 1	F8WAB1;F8WAB0;F8W8M4;A6NKJ2;Q5T6N4;A6NCD9;Q5T6N2;O14639-2;O14639;Q5JVV3	27.3594	27.5421	27.3291	27.3361	27.3232	27.2719		-0.0233213	0.986999		-0.218923	0.795977		-0.0571775	0.954466			0.966195		27.7895	27.2803	27.0084	27.3828	27.524	27.7195	27.632	27.0401	27.3153	26.976	27.6458	27.3153	27.4073	27.0914	27.217	27.6181	27.3662	27.1015	26.9539	27.4073	27.6251
ABLIM3	Actin-binding LIM protein 3	O94929-2;O94929-3;O94929	26.9825	26.9669	27.0706	27.2305	27.1858	27.2648		0.24797	0.849681		0.218874	0.700577		0.194182	0.788961			0.853952		26.9977	27.0296	26.9202	26.7645	26.976	27.1604	27.17	27.1795	26.8623	27.5014	27.5165	27.2445	26.6595	27.189	27.1984	27.2445	27.1115	26.9539	27.3828	27.1984	27.524
ABRACL	Costars family protein ABRACL	Q9P1F3	28.366	28.2176	28.3018	28.6509	28.4981	28.6247		0.284988	0.822315		0.280452	0.772378		0.32286	0.534958			0.590921		28.2399	28.2399	28.6181	28.1937	27.9202	28.5389	28.1115	28.3745	28.4194	28.579	28.9146	28.7357	28.3745	28.5609	28.6181	28.5463	28.267	28.632	28.8264	28.391	28.6492
ACAA1	3-ketoacyl-CoA thiolase, peroxisomal	P09110;C9JDE9;F5GXL8;H7C131;G5E935	26.7948	26.9172	26.7794	26.9997	27.1345	27.0054		0.20486	0.81762		0.217216	0.785236		0.225959	0.785781			0.792504		26.9202	26.7645	26.6998	26.8858	26.7645	27.1015	26.5711	27.1214	26.6458	26.7771	27.2262	27.1214	26.8741	27.0084	27.4234	26.965	27.141	27.1984	26.7771	27.2077	26.8385
ACACA	Acetyl-CoA carboxylase 1;Biotin carboxylase	Q13085-3;Q13085-2;Q13085;Q13085-4;F8W6G0	22.941	24.3503	24.5004	24.1268	24.5033	23.6785		1.18583	0.752103		0.152988	0.975783		-0.821977	0.807929			0.798907		23.3289	22.8952	22.5987	24.4984	23.1914	25.3612	24.7645	23.5649	25.1719	22.9596	24.3712	24.6184	24.558	25.4298	24.3645	24.8858	23.3331	24.9406	23.2175	22.1452	24.4105
ACADM	Medium-chain specific acyl-CoA dehydrogenase, mitochondrial	B7Z9I1;Q5T4U5;P11310;P11310-2;B4DJE7	26.5812	26.8509	27.1454	27.1276	27.0387	26.8821		0.546413	0.639061		0.187811	0.857129		-0.263357	0.671704			0.588359		26.8142	26.5045	26.425	26.965	26.5165	27.0711	27.17	27.2262	27.0401	27.0608	26.965	27.0296	27.4551	27.17	27.2979	27.1115	26.5754	26.965	26.632	27.1795	26.7518
ACADSB	Short/branched chain specific acyl-CoA dehydrogenase, mitochondrial	B4DQ51;P45954	26.3905	26.5302	26.824	26.5347	26.4928	26.27		0.144206	0.894804		-0.0373824	0.984436		-0.553954	0.50131			0.809627		26.3511	26.3762	26.4441	26.7389	26.2335	26.6181	26.4346	26.9869	27.0505	26.2589	26.2979	26.521	27.0608	27.0084	26.3528	26.4362	26.1738	26.3187	26.1449	26.1075	26.509
ACADVL	Very long-chain specific acyl-CoA dehydrogenase, mitochondrial	G3V1M7;P49748-2;P49748;F5H2A9	26.8634	26.9624	27.0213	27.1974	27.135	26.8344		0.333955	0.833998		0.17261	0.824677		-0.186961	0.792184			0.755296		26.8264	26.7771	26.9869	27.1984	26.8264	26.8623	26.8264	27.4234	26.8142	27.0401	27.0401	27.0296	27.6798	27.3992	27.0505	27.0711	27.019	26.8385	26.7518	26.9089	26.8385
ACAP2	Arf-GAP with coiled-coil, ANK repeat and PH domain-containing protein 2	Q15057	27.3728	27.0683	27.1131	27.2304	27.1558	27.1817		-0.142442	0.873734		0.0874244	0.93721		0.068665	0.903018			0.912167		27.3239	27.4707	27.3239	27.189	26.976	27.0401	27.0914	27.2077	27.0401	27.4707	27.341	26.8385	27.2714	27.2803	27.0084	26.7518	27.5826	27.4314	26.9316	27.2625	27.1015
ACAT1	Acetyl-CoA acetyltransferase, mitochondrial	P24752;H0YEL7;G3XAB4	24.1163	23.3318	23.4834	23.1241	23.6265	23.6377		-0.99219	0.853905		0.29466	0.869735		0.154291	0.95967			0.95513		24.6328	23.6288	24.0872	22.9899	23.4883	23.5173	24.7594	22.2006	23.4902	23.7345	23.3012	20.8176	24.6431	22.692	23.8093	23.8481	24.1565	24.3239	23.6433	23.0452	23.5384
ACAT2	Acetyl-CoA acetyltransferase, cytosolic	Q9BWD1;B7Z233	29.1512	29.3118	29.3257	29.2085	29.3031	29.2604		0.0573785	0.886036		-0.00875998	0.990146		-0.0653229	0.951342			0.963868		29.1483	29.1937	29.1115	29.2193	29.17	29.5463	29.6544	28.94	29.3828	29.0322	29.2979	29.2847	29.2193	29.3787	29.217	29.4113	29.2054	29.17	29.099	29.1337	29.6389
ACBD3	Golgi resident protein GCP60	Q9H3P7	25.2258	25.3885	25.3267	24.7615	24.661	24.7776		-0.464321	0.895761		-0.727524	0.630389		-0.549069	0.796617			0.913331		25.2535	25.3066	25.1174	25.0275	25.3811	25.7569	25.4008	24.9584	25.6209	25.1642	25.7995	23.0891	24.9933	24.494	24.2486	25.0772	24.824	23.5659	25.4266	24.9271	25.1908
ACLY	ATP-citrate synthase	E7ENH9;P53396;P53396-2;B4E3P0	31.1518	31.215	31.2009	31.1879	31.3515	31.3167		0.0361131	0.904766		0.136487	0.800614		0.115791	0.719038			0.6576		31.2077	31.13	31.1177	31.0927	31.1239	31.4284	31.2591	31.13	31.2135	31.08	31.3033	31.1664	31.2019	31.4083	31.2759	31.4184	31.3033	31.1724	31.3196	31.2924	31.4823
ACO1	Cytoplasmic aconitate hydratase;Aconitate hydratase	P21399;Q9HBB2;Q59FI0	30.2067	30.2832	30.2958	30.2304	30.2222	30.2808		0.0236893	0.953862		-0.0610026	0.868388		-0.0149228	0.964954			0.951206		30.2647	30.2193	30.1361	30.3515	30.1361	30.362	30.3515	30.1842	30.3515	30.1361	30.3724	30.2647	30.1483	30.341	30.099	30.2647	30.1842	30.2308	30.3088	30.1604	30.4234
ACO2	Aconitate hydratase, mitochondrial	A2A274;Q99798;F5H2A5;B4DW08	27.713	28.0438	28.1646	28.0886	28.0705	28.0793		0.375664	0.642086		0.0266581	0.982096		-0.0852172	0.905279			0.664062		27.8324	27.4862	27.8203	28.0608	27.8445	28.2262	28.258	28.4032	27.8324	28.0864	27.976	28.066	28.2262	28.362	27.9595	28.0864	27.8741	28.0608	28.1556	27.8385	28.2625
ACOT13	Acyl-coenzyme A thioesterase 13;Acyl-coenzyme A thioesterase 13, N-terminally processed	F5H2L4;Q9NPJ3	24.7722	25.1771	24.5887	25.3783	25.0386	25.514		0.606074	0.749092		-0.138513	0.974203		0.925266	0.717581			0.890559		24.7077	24.9225	24.6865	25.1371	25.4138	24.9803	25.4457	25.2571	23.0633	25.2317	25.1174	25.1642	25.9998	23.5436	25.8385	25.3877	25.3844	25.4769	25.3101	25.4645	25.8044
ACOT7	Cytosolic acyl coenzyme A thioester hydrolase	O00154-4;O00154-6;O00154;B4DUX0;O00154-5;O00154-2;O00154-3	28.4098	28.3006	28.4372	28.4261	28.4721	28.529		0.016331	0.979639		0.171483	0.834523		0.0918557	0.884014			0.93614		28.4194	28.5165	28.2935	28.17	28.341	28.391	28.341	28.5352	28.4354	28.1747	28.5426	28.5165	28.4707	28.6663	28.2979	28.7833	28.141	28.3951	28.7421	28.2759	28.7031
ACOT8	Acyl-coenzyme A thioesterase 8	H7C5A7;E9PJN0;A6NDT2;O14734;H0Y698;Q9BR14;E9PMC4;G5E995;E9PIS4;E9PRD4	23.9009	24.8226	24.9646	24.8304	24.5688	24.7552		0.929521	0.786846		-0.253797	0.898624		-0.209394	0.851471			0.667265		24.7594	23.6118	23.3314	24.7286	25.0105	24.7286	24.976	24.5105	25.4073	24.8717	24.7846	24.7024	24.9628	25.3612	24.6096	23.5499	24.7543	24.5754	24.5926	25.0732	24.7796
ACOT9	Acyl-coenzyme A thioesterase 9, mitochondrial	Q9Y305-3;Q9Y305-2;Q9Y305;Q9Y305-4	24.2117	25.0873	25.157	25.1718	25.1737	24.5292		0.96009	0.817032		0.0863932	0.950879		-0.627842	0.845918			0.880583		24.7746	25.1174	22.7431	25.6403	24.6811	24.9406	25.217	25.0975	25.1565	24.9225	25.1488	24.8288	25.7871	25.002	25.1371	25.1946	25.3612	25.341	22.6379	25.0935	25.0443
ACOX1	Peroxisomal acyl-coenzyme A oxidase 1	Q15067-2;Q15067;F5GYQ8;F5H0M0	29.1538	29.3459	29.294	29.3195	29.3953	29.4253		0.165723	0.764196		0.049389	0.974537		0.13129	0.852256			0.91304		29.2216	28.9977	29.2422	29.2891	29.1288	29.6198	29.3869	29.1435	29.3515	29.2647	29.3367	29.2714	29.4053	29.362	29.2602	29.8474	29.1115	29.0889	29.5518	29.389	29.6714
ACP1	Low molecular weight phosphotyrosine protein phosphatase	P24666;G5E9R5;B5MCC7;P24666-3;P24666-2;F2Z2Q9;C9JNS5	28.6154	28.9102	28.9275	28.8174	28.7647	28.832		0.20205	0.817659		-0.145507	0.837029		-0.095514	0.870947			0.833727		28.6424	28.4394	28.7645	28.965	28.7895	28.976	29.0634	28.7708	28.9484	28.805	29.094	28.7739	28.5969	29.0296	28.6251	28.8142	28.5898	28.7064	29.0137	28.632	28.976
ACP2	Lysosomal acid phosphatase	P11117;E9PHY0;E9PQY3;F5H1S6;E9PP23;B7Z7D2;F5GWV7	25.3916	25.1907	25.3518	25.2484	25.3924	25.3837		-0.143247	0.894676		0.201646	0.843418		0.0318597	0.976667			0.985664		25.2926	25.3778	25.5045	25.2643	25.1095	25.1984	25.1795	25.5869	25.2891	25.4234	25.0275	24.9134	25.6292	25.317	25.019	25.3877	25.8457	25.0443	26.0254	25.3477	25.1174
ACSBG1	Long-chain-fatty-acid--CoA ligase ACSBG1	F5H4U6;Q96GR2	24.2214	24.0336	23.9899	24.3083	24.5282	24.2663		0.0868502	0.931635		0.494654	0.664672		0.276414	0.563399			0.592373		24.5404	24.3443	23.7796	23.9495	23.8481	24.3031	23.976	23.9495	24.0443	24.3712	24.417	24.2961	24.1488	24.6458	24.7895	24.5522	24.1253	24.019	24.4551	24.4041	24.1871
ACSL1	Long-chain-fatty-acid--CoA ligase 1	E7EPM6;P33121;B7Z452;P33121-2;B7Z3Z9	25.7684	25.5827	25.4073	25.7166	25.3489	25.5249		-0.0517565	0.905915		-0.23379	0.826242		0.117597	0.85514			0.557817		25.9111	25.7129	25.6811	25.4073	25.6703	25.6703	25.2354	25.5955	25.391	25.6891	25.6622	25.6458	25.8694	25.5783	24.9043	25.4298	25.4831	25.48	25.726	25.2643	25.6292
ACSL4	Long-chain-fatty-acid--CoA ligase 4	O60488-2;O60488	28.5937	28.4429	28.4274	28.5177	28.4218	28.4298		-0.0759368	0.851458		-0.0211085	0.988068		0.00237497	0.999738			0.948618		28.524	28.5573	28.6998	28.2979	28.3578	28.673	28.2759	28.524	28.4823	28.4707	28.4314	28.5128	28.6561	28.7292	28.391	28.1842	28.3828	28.0762	28.5203	28.3869	28.7357
ACSL5	Long-chain-fatty-acid--CoA ligase 5	Q9ULC5;Q9ULC5-3;B4DX30;Q9ULC5-4	24.7302	24.9441	25.4064	23.4891	24.8704	24.3299		-1.2411	0.784376		-0.0737737	0.932821		-1.07642	0.478458			0.221923		25.2499	24.3031	24.6376	24.7077	25.239	24.8858	25.5045	25.6012	25.1135	22.7997	23.6506	22.6869	24.8191	25.0275	25.0317	24.824	24.5983	24.7024	24.8288	24.2096	23.579
ACSS1	Acetyl-coenzyme A synthetase 2-like, mitochondrial;Acetyl-coenzyme A synthetase	Q9NUB1-2;Q9NUB1;Q6ZV30;F5H6F4;F8W7Y1;E9PC79	25.8196	26.0459	26.1969	26.4552	26.3429	26.1361		0.63557	0.744033		0.297036	0.720499		-0.0607599	0.913625			0.435709		25.9043	25.6757	25.8788	26.0608	25.8973	26.1795	26.3359	26.3031	25.9517	26.4425	25.9912	26.4441	26.9428	26.3861	26.1585	26.6458	26.1814	26.2785	25.9383	26.1312	26.1965
ACSS2	Acetyl-coenzyme A synthetase, cytoplasmic	F6WZD5;Q9NR19;Q5QPH3;E7EWU3;B3KUV2	26.6531	26.6361	26.5347	26.7524	26.7639	26.6693		0.099304	0.851318		0.127856	0.871183		0.134611	0.87541			0.927357		26.7518	26.632	26.5754	26.317	26.7771	26.8142	26.3728	26.8142	26.417	26.5898	26.9202	26.673	26.8264	26.4984	26.8741	26.9316	26.7518	26.6458	26.6181	26.3943	27.019
ACTA1	Actin, alpha cardiac muscle 1;Actin, gamma-enteric smooth muscle;Actin, aortic smooth muscle;Actin, alpha skeletal muscle	P68032;P63267;P62736;P68133;F5H1C1;Q5T8M8;A6NL76;B4DUI8;Q5T8M7;E9PG30;E7EQV5	34.6623	34.106	33.8748	34.001	34.361	34.3141		-0.661263	0.821483		0.255002	0.846929		0.439215	0.539856			0.710739		34.8974	34.6253	34.4642	34.7099	33.7849	33.8233	33.8233	33.6944	34.1068	33.5412	33.5296	34.1146	34.8186	34.0592	34.4272	34.2478	34.7099	34.0184	34.3502	34.2408	34.6469
ACTB	Actin, cytoplasmic 1;Actin, cytoplasmic 1, N-terminally processed	P60709;B4E335;B4DW52	37.768	37.6869	37.6298	37.677	37.6731	37.6363		-0.0909615	0.845672		-0.0138286	0.973792		0.00655015	0.985722			0.914155		37.834	37.6185	37.8516	37.6321	37.7175	37.7111	37.6253	37.6388	37.6253	37.6456	37.7861	37.6787	37.5978	37.78	37.6116	37.7239	37.5768	37.6185	37.7553	37.4287	37.7428
ACTBL2	Beta-actin-like protein 2	Q562R1	27.064	27.3294	27.3988	27.4035	26.1824	27.425		0.339488	0.766996		-1.14699	0.843825		0.0261774	0.947654			0.879614		27.0608	27.1015	27.0296	26.9202	27.6527	27.4154	27.3745	27.2979	27.524	27.5969	27.611	27.189	27.217	22.9199	27.141	27.4154	27.2535	27.4073	27.2979	27.4707	27.524
ACTG1	Actin, cytoplasmic 2;Actin, cytoplasmic 2, N-terminally processed	P63261;F5H0N0;I3L3I4;I3L3I0;I3L1U9	30.2114	30.3824	30.4173	30.0768	30.4493	30.3305		-0.134608	0.851367		0.0669216	0.967244		-0.086806	0.954622			0.915273		30.3724	30.2535	30.0084	30.0479	30.2759	30.8234	30.6022	30.3088	30.341	29.995	30.1842	29.8973	30.2308	30.4919	30.1724	30.8682	30.2647	29.668	30.4823	30.1239	31.0479
ACTL6A	Actin-like protein 6A	O96019-2;O96019;C9JQT2;H7C5S0	23.9946	23.5003	23.7938	23.6156	23.3919	23.8729		-0.37901	0.889402		-0.108416	0.98194		0.0791349	0.958731			0.954998		24.317	24.002	23.6649	23.0422	23.2641	24.1946	24.0359	23.4049	23.9406	23.5758	24.0854	22.4502	24.3511	23.0773	22.2554	24.2244	24.0105	23.0119	24.3712	23.9991	24.1095
ACTN1	Alpha-actinin-1	P12814-3	34.3084	34.3239	34.2826	34.2868	34.3562	34.3848		-0.0216188	0.981535		0.0323013	0.965509		0.102218	0.827965			0.999543		34.6735	34.099	34.1529	34.402	34.1679	34.402	34.3101	34.2549	34.2828	34.2689	34.547	34.2965	34.0348	34.5062	34.2897	34.4763	34.1529	34.4943	34.5002	34.099	34.4458
ACTN4	Alpha-actinin-4	O43707;D6PXK4;E7EV83	30.8525	30.9618	30.7533	30.8938	30.8026	30.9373		0.0413094	0.958343		-0.159199	0.816271		0.184013	0.502068			0.908736		31.1664	30.5754	30.8157	31.08	30.7771	31.0283	30.8309	30.6285	30.8004	30.8901	30.9677	30.9882	30.7292	30.9117	30.6544	30.9814	30.6629	31.0017	30.8973	30.9746	30.8756
ACTR10	Actin-related protein 10	Q9NZ32;F5H5L9	27.3391	27.4315	26.9914	27.0212	27.1591	27.3552		-0.317828	0.850468		-0.272381	0.79858		0.363784	0.594025			0.783142		27.5609	27.3153	27.141	27.632	27.1015	27.5609	27.3239	26.7645	26.8858	26.5898	26.8385	27.0813	27.5754	27.1507	26.8973	27.141	27.4473	27.1312	27.5165	27.4234	27.3494
ACTR1A	Alpha-centractin	P61163;B4DXP9;F5H3I4	30.556	30.7401	30.6569	30.6916	30.7671	30.8761		0.135513	0.846198		0.0269928	0.986132		0.219203	0.704741			0.854292		30.5573	30.6285	30.4823	30.7533	30.5481	30.9188	30.6964	30.6285	30.6458	30.5296	30.9814	30.6798	30.5754	31.1053	30.6964	30.8234	30.4433	30.6198	31.0217	30.7453	31.1177
ACTR1B	Beta-centractin	P42025;G5E9Q5	26.9435	26.9552	26.8636	27.0219	27.1327	27.019		0.0783776	0.907331		0.177494	0.855207		0.155387	0.794718			0.922804		27.1312	26.8973	26.8019	26.9202	26.8142	27.1312	26.976	26.7645	26.8504	27.2354	27.0084	26.8142	27.0296	27.5315	26.6595	27.17	27.17	27.0401	27.1795	26.6865	27.17
ACTR2	Actin-related protein 2	P61160;E9PF41;G3V1L8;F5H6T1	32.3428	32.4287	32.4766	32.4507	32.5093	32.5102		0.107831	0.854161		0.0806551	0.901039		0.0335741	0.951371			0.935641		32.4678	32.3357	32.225	32.3033	32.3542	32.6285	32.4823	32.4581	32.4895	32.5978	32.4284	32.5343	32.2422	32.6544	32.2842	32.7109	32.3879	32.4108	32.6902	32.2897	32.6501
ACTR3	Actin-related protein 3	P61158;B4DXW1;F5H3P5;B4DTI0	33.8522	33.9097	33.9867	33.881	33.9394	33.9543		0.028814	0.960913		0.0296704	0.954867		-0.0323957	0.957855			0.954716		33.9153	33.9677	33.6735	33.8233	33.8792	34.0266	33.9505	33.9505	34.0592	33.8516	34.0266	33.8608	33.7849	33.9848	33.8792	34.099	33.7946	33.8042	34.043	33.7653	34.2048
ACY1	Aminoacylase-1	C9JMV9;C9J6I6;Q03154;C9J9D8;C9JWD4	23.0542	23.2184	22.6894	23.7939	24.516	22.9054		0.739654	0.818455		1.29755	0.618706		0	0			0.364319		22.0204	23.6158	23.5266	22.5695	24.1831	22.9026	23.212	21.9753	22.8809	23.9272	23.0011	24.0156	24.2317	25.0605	24.4676	24.2607	24.275	22.9029	23.1141	21.8874	23.7172
ACYP1	Acylphosphatase;Acylphosphatase-1	G3V2U7;P07311	26.7723	26.664	26.7243	26.7308	26.6068	26.6679		-0.0414677	0.956617		-0.0571995	0.902882		-0.056373	0.948878			0.973998		26.7645	26.8264	26.726	26.673	26.673	26.6458	27.0608	26.3861	26.726	26.726	27.1015	26.5898	26.506	26.673	26.5653	26.8142	26.3745	26.5653	26.5711	26.8623	26.673
ADAM10	Disintegrin and metalloproteinase domain-containing protein 10	A8MY20;O14672;B4DU28	29.4458	29.4609	29.7247	29.3955	29.1416	29.2489		-0.0503079	0.941383		-0.319317	0.668308		-0.475827	0.532537			0.409514		29.3196	29.4532	29.5646	29.5754	29.3174	29.49	29.5033	29.8324	29.8385	29.3473	29.1337	29.5146	29.5862	29.4354	29.0583	28.9814	29.0914	29.17	29.3724	28.8887	29.5646
ADCY6	Adenylate cyclase type 6	O43306-2;O43306	24.8998	25.0267	25.11	24.7602	23.4929	23.9589		-0.13963	0.958024		-1.53383	0.351004		-1.15111	0.667319			0.357125		24.4488	25.1293	25.1214	25.0894	24.976	25.0148	24.7441	25.5841	25.002	24.7655	23.9225	24.7746	25.5783	22.9029	23.3608	23.3909	24.317	24.2891	22.4766	24.1795	24.8904
ADD1	Alpha-adducin	E7EV99;E7ENY0;P35611-2;A2A3N8;P35611;P35611-3;Q86XM2;Q96D30;H0Y9H2	29.6673	29.6295	29.56	29.8065	29.704	29.7151		0.139192	0.890113		0.074443	0.914289		0.155032	0.636547			0.912087		29.7549	29.5389	29.708	29.5518	29.4804	29.8564	29.5808	29.6093	29.49	29.6163	30.1361	29.995	29.4785	29.995	29.6475	29.6216	29.5518	29.5951	29.8872	29.6881	29.6898
ADD3	Gamma-adducin	Q9UEY8-2;Q9UEY8	28.3907	28.1792	28.3669	28.5454	28.3808	28.4982		0.154644	0.797116		0.201658	0.793909		0.131302	0.787938			0.588416		28.3282	28.5682	28.2759	28.2123	28.0762	28.249	28.5609	28.203	28.3367	28.5499	28.5682	28.4629	28.6004	28.5315	28.5128	28.4234	28.0557	28.3869	28.5499	28.4032	28.6527
ADH5	Alcohol dehydrogenase class-3	P11766	30.2882	30.4354	30.3499	30.3861	30.4506	30.4716		0.0978926	0.818095		0.0152405	0.987748		0.121685	0.706853			0.847033		30.4032	30.2193	30.2422	30.5296	30.2193	30.5573	30.3515	30.2647	30.4334	30.3515	30.5014	30.3828	30.3088	30.341	30.4433	30.6458	30.3724	30.3088	30.5573	30.4629	30.5573
ADK	Adenosine kinase	B7Z800;P55263-2;P55263;P55263-3	26.8195	27.1399	26.8194	27.2765	27.3073	27.2809		0.457024	0.773679		0.167401	0.841569		0.461504	0.514142			0.428604		27.1312	26.7518	26.5754	27.1984	27.0608	27.1604	26.9428	26.8973	26.6181	27.5609	27.4862	27.0084	27.0505	27.5969	27.0813	27.4394	27.1115	27.217	27.3662	26.9869	27.5536
ADO	2-aminoethanethiol dioxygenase	Q96SZ5	23.3499	22.6532	23.7626	23.078	23.7475	23.6289		0	0		1.0943	0.740113		-0.133694	0.9093			0.660808		23.2259	23.3503	23.4735	23.6649	22.9603	21.3343	23.6211	24.3059	23.3608	23.7676	23.0192	22.2363	23.2891	23.6757	23.8385	23.7575	23.7182	23.7286	23.7019	23.867	23.2181
ADPGK	ADP-dependent glucokinase	Q9BRR6-2;Q9BRR6;H3BRS6;E7EQY8	22.9344	23.8478	24.0756	23.8548	23.914	24.0342		0.92036	0.845254		0.0662109	0.990879		-0.0413442	0.985458			0.914969		23.0247	23.187	22.5916	23.3654	22.8168	25.3612	24.4105	24.4923	23.3238	21.9854	23.8764	24.6486	24.9089	23.9672	22.9616	24.2535	24.4738	24.5105	22.844	24.2244	24.558
ADPRH	[Protein ADP-ribosylarginine] hydrolase	P54922	27.1602	27.2152	26.9433	27.1619	27.2652	27.1056		0.00166305	0.998302		0.0500692	0.968296		0.162338	0.895927			0.939966		27.1795	27.1312	27.17	27.3745	27.1795	27.0914	26.8385	27.5536	26.4378	27.0711	27.4314	27.3066	26.8385	27.5898	26.9202	27.4394	27.1115	26.8858	27.189	26.965	27.3828
ADRBK1	Beta-adrenergic receptor kinase 1	P25098;E9PRV7	27.607	27.6514	27.6915	27.7075	27.6609	27.7525		0.100502	0.81434		0.00951449	0.990255		0.060935	0.939072			0.962473		27.5609	27.5536	27.7064	27.5682	27.673	27.7129	27.6181	27.8385	27.6181	27.6251	27.7771	27.7958	27.632	27.6389	27.7389	27.8264	27.4394	27.7064	28.0137	27.4394	27.8504
ADRM1	Proteasomal ubiquitin receptor ADRM1	Q16186;E9PEC0	25.8947	25.4549	25.2902	25.4896	24.7174	25.7992		-0.405162	0.69655		-0.737479	0.864319		0.508993	0.600888			0.836859		25.9361	25.8741	25.8741	25.417	25.3578	25.5898	25.4298	25.141	25.2996	25.5551	25.7156	25.2643	25.4234	22.3445	25.6292	24.9847	25.9111	26.3811	25.6918	25.5225	25.6012
ADSL	Adenylosuccinate lyase	P30566;E7ERF4;P30566-2;B4DUM2	28.6611	28.5116	28.5443	28.7088	28.8023	28.7411		0.0476263	0.95144		0.290773	0.632319		0.196853	0.540131			0.632729		28.7357	28.8203	28.4274	28.6285	28.3452	28.5609	28.4354	28.6998	28.4976	28.579	28.7739	28.579	28.9031	28.6216	28.8385	28.8234	28.9259	28.6527	28.8385	28.6931	28.7802
ADSS	Adenylosuccinate synthetase isozyme 2	F8W9D6;P30520	25.6438	25.531	25.5643	25.3405	25.6461	25.7039		-0.303349	0.749018		0.115171	0.761024		0.13958	0.698417			0.340545		25.5667	25.772	25.5926	25.5105	25.6431	25.4394	25.5344	25.6971	25.4614	25.4583	25.5463	25.0894	25.2678	25.7312	25.6068	25.6944	25.5522	25.5869	25.7846	25.6348	25.8093
AFAP1	Actin filament-associated protein 1	Q8N556;E9PDT7	25.2656	24.9404	25.3113	25.4306	25.3156	25.2835		0.164996	0.952567		0.375222	0.869096		-0.0277383	0.988427			0.994423		25.4073	26.0317	24.3578	24.9134	25.7208	24.1871	25.3975	25.9043	24.632	24.824	25.4457	25.7771	25.6757	24.4549	25.2678	25.4769	26.0629	25.1681	24.6566	26.204	25.1055
AFTPH	Aftiphilin	Q6ULP2-5;Q6ULP2-2;Q6ULP2-4;Q6ULP2;B8ZZI9;Q6ULP2-3	23.4051	23.8385	23.3313	24.1525	24.2984	24.3361		0.747455	0.846318		0.459874	0.841477		1.00481	0.698613			0.835783		24.2244	23.7796	22.2112	24.1332	24.275	23.1074	23.7389	24.2821	21.9728	23.5358	24.945	24.3101	23.8191	24.7441	23.4351	24.48	24.5344	24.1795	24.7746	23.8858	24.5045
AGAP2	Arf-GAP with GTPase, ANK repeat and PH domain-containing protein 2	Q99490-2;F8VVT9;Q99490	25.3517	25.1404	25.1136	25.4027	25.0743	25.1048		0.0510139	0.967077		-0.0661297	0.897695		-0.00880273	0.990994			0.840924		25.0148	25.3511	25.6891	25.2571	25.228	24.9361	24.8717	25.3877	25.0813	25.7543	25.5696	25.2096	25.0772	25.2096	24.918	24.9977	25.1719	25.391	24.9628	25.2463	24.8191
AGFG1	Arf-GAP domain and FG repeat-containing protein 1	F5GYJ2;P52594-2;P52594-3;P52594;E9PHX7;B8ZZY2;C9J2I0	25.8728	25.7358	25.4207	25.7391	25.6888	25.7314		-0.133667	0.895938		-0.046965	0.981807		0.310687	0.541783			0.884076		25.8166	25.7103	26.0914	25.4984	25.8997	25.8093	25.4551	25.4425	25.3645	25.8069	25.604	26.1095	25.4362	25.5075	25.9473	25.1871	26.1135	25.5195	25.6811	25.6891	26.0359
AGL	Glycogen debranching enzyme;4-alpha-glucanotransferase;Amylo-alpha-1,6-glucosidase	P35573;P35573-2;P35573-3	28.9808	28.7399	28.8211	28.7527	28.9374	28.9575		-0.228098	0.777381		0.197515	0.733212		0.136389	0.791349			0.654777		29.0111	28.8474	29.0839	28.8712	28.6389	28.7096	28.8712	28.9259	28.6663	28.6285	28.6898	28.906	28.7864	28.9622	28.7708	29.1164	28.9002	28.7549	29.0401	28.877	29.158
AGO2	Protein argonaute-2	Q9UKV8;Q9UKV8-2	25.5347	25.6098	25.3077	24.4093	25.3275	25.6007		-1.12542	0.81867		-0.282366	0.871226		0.292972	0.871015			0.826478		25.5955	25.4362	25.5725	25.7077	25.5609	25.5609	25.5463	25.7619	24.615	22.6832	25.6865	25.5783	23.6893	25.8481	25.2643	24.3712	25.8264	25.0233	25.797	25.3712	26.2114
AGPS	Alkyldihydroxyacetonephosphate synthase, peroxisomal	O00116;F5H632	26.8912	27.0051	26.9173	27.1273	27.0652	27.022		0.236028	0.747501		0.0600559	0.932551		0.104759	0.875192			0.891061		26.9977	26.8019	26.8741	27.17	26.8264	27.019	26.7389	27.0813	26.9316	27.0505	27.2625	27.1984	26.9977	27.3239	27.019	26.8264	27.0914	26.8142	27.17	26.8504	27.2535
AGT	Angiotensinogen;Angiotensin-1;Angiotensin-2;Angiotensin-3;Angiotensin-4;Angiotensin 1-9;Angiotensin 1-7;Angiotensin 1-5;Angiotensin 1-4	P01019	25.239	24.2445	25.0777	24.7727	25.2657	25.2504		-0.466258	0.897763		1.02125	0.829292		0.172698	0.864487			0.915433		25.391	24.7945	25.5315	25.141	22.1883	25.4041	25.3205	24.7182	25.1946	25.3844	25.1488	22.991	25.5667	24.8904	25.2096	25.3645	25.5983	25.4425	25.4362	24.8481	25.275
AHCY	Adenosylhomocysteinase	P23526;F5H737	28.3743	28.5286	28.6618	28.5829	28.5466	28.5852		0.208602	0.829816		0.0180271	0.972987		-0.0765543	0.89939			0.837439		28.5682	28.1842	28.3704	28.6251	28.4823	28.4785	28.7581	28.5609	28.6663	28.6629	28.7162	28.5573	28.3951	28.4394	28.4707	28.6831	28.5934	28.6251	28.7421	28.7292	28.2445
AHCYL2	Putative adenosylhomocysteinase 3;Adenosylhomocysteinase	Q96HN2-2;H0Y8B3;F8W7N8;D7UEQ7;Q96HN2-3;D9N155	29.1783	29.1931	29.1074	29.1924	29.3266	29.3376		0.0140959	0.980419		0.133544	0.85213		0.230202	0.72448			0.916374		29.2399	28.9841	29.3109	29.3557	28.8593	29.3641	29.104	29.1913	29.027	28.9732	29.3282	29.2216	29.2467	29.4785	29.3066	29.1386	29.3828	29.1795	29.5591	29.0401	29.5718
AHSA1	Activator of 90 kDa heat shock protein ATPase homolog 1	O95433;G3V438;B4DUR9;H0YJG7;H0YJ63	27.2823	27.7441	27.4066	27.3211	27.5251	27.5677		0.0388031	0.910715		-0.218998	0.795463		0.16117	0.845473			0.560994		27.2077	27.2077	27.4314	27.8142	27.3992	28.019	27.632	27.1015	27.4862	27.2714	27.341	27.2891	27.3828	27.4473	27.5682	27.5315	27.5536	27.2625	27.5682	27.5898	27.8504
AHSG	Alpha-2-HS-glycoprotein;Alpha-2-HS-glycoprotein chain A;Alpha-2-HS-glycoprotein chain B	C9JV77;F5H0Q5;P02765	27.3542	27.0689	27.2433	27.0675	26.9992	26.7354		-0.28675	0.745719		-0.0697209	0.967427		-0.507894	0.650427			0.700029		27.4629	27.1604	27.4394	26.9316	26.6998	27.5754	26.7389	27.7195	27.2714	27.1015	27.189	26.8385	27.141	26.9977	26.6595	27.2891	27.0505	26.5725	26.6865	27.0505	26.632
AIDA	Axin interactor, dorsalization-associated protein	F5H715;Q96BJ3;Q96BJ3-2	23.4006	22.6818	23.114	23.4057	23.4977	23.8329		0.0051082	0.997199		0.81587	0.755824		0.718924	0.685779			0.68814		23.2416	23.9584	23.0018	22.9587	22.3032	22.7835	23.391	23.3236	22.6273	23.1874	23.5324	23.6209	23.2821	24.264	24.019	23.0386	22.669	23.5983	24.7293	23.242	23.7619
AIFM1	Apoptosis-inducing factor 1, mitochondrial	O95831-3;O95831;O95831-2	26.0009	26.4642	26.041	26.4066	26.5023	26.5329		0.405711	0.819439		0.0381122	0.988353		0.491885	0.767113			0.892003		25.8858	25.654	26.4629	26.5285	26.5045	26.3595	26.2714	25.945	25.9066	26.5898	25.8694	26.341	26.8264	27.2979	26.3256	25.9383	26.4473	26.976	25.5696	26.9539	26.632
AIMP1	Aminoacyl tRNA synthase complex-interacting multifunctional protein 1;Endothelial monocyte-activating polypeptide 2	Q12904;Q12904-2;B4DNK3	27.5755	27.7325	27.7558	27.7552	27.7668	27.8041		0.179705	0.860993		0.0343709	0.917378		0.0482893	0.854509			0.915528		27.6181	27.4154	27.6931	27.5898	27.7453	27.8623	27.8203	27.6389	27.8081	27.4629	28.189	27.8081	27.5609	27.7453	27.8081	27.8142	27.6998	27.8385	27.8324	27.8324	27.7129
AIMP2	Aminoacyl tRNA synthase complex-interacting multifunctional protein 2	A8MU58;F8W950;Q13155	26.2998	25.8594	25.7124	25.9529	25.8997	26.0301		-0.346956	0.797893		0.0403042	0.955111		0.317745	0.70651			0.59455		26.0793	26.2021	26.6181	25.7645	25.7103	26.1035	25.4138	25.6811	26.0422	25.772	26.0935	25.8385	26.1075	25.8069	26.0711	25.8166	25.9043	26.141	25.8215	25.8288	26.329
AIP	AH receptor-interacting protein	O00170;E9PPD7;E9PMH2	27.0689	27.0875	27.0425	27.0713	27.0915	27.1078		0.00240135	0.997717		0.0040582	0.998557		0.0652537	0.94887			1		26.6998	27.0914	27.4154	26.9539	27.0914	27.217	27.0401	26.7129	27.3745	26.8504	27.2535	27.141	27.0401	27.1015	27.2891	27.1984	26.7771	26.8741	27.3153	27.1604	27.0813
AK1	Adenylate kinase isoenzyme 1	Q5T9B7;P00568;H0Y4J6	30.6417	30.532	30.632	30.6759	30.4351	30.4892		0.0342312	0.964336		-0.0969175	0.845199		-0.142722	0.742944			0.791082		30.4919	30.6798	30.7533	30.4919	30.5109	30.5934	30.4334	30.6544	30.8081	30.6022	30.6798	30.9882	30.4334	30.341	30.3303	30.6458	30.4234	30.3724	30.5203	30.4532	30.611
AK2	Adenylate kinase 2, mitochondrial;Adenylate kinase 2, mitochondrial;Adenylate kinase 2, mitochondrial, N-terminally processed	F8W1A4;P54819-2;P54819;P54819-5;P54819-6;E7EWH4;P54819-3;F8VZG5;F8VY04;P54819-4;G3V213	29.4579	29.3747	29.4562	29.5036	29.4799	29.4261		0.0456727	0.828802		0.105144	0.773975		-0.0300337	0.959908			0.952447		29.509	29.4234	29.4413	29.4688	29.2913	29.3641	29.5682	29.5536	29.2467	29.4804	29.5389	29.4823	29.5128	29.5146	29.3494	29.5184	29.5371	29.4214	29.3303	29.2285	29.7244
AK3	GTP:AMP phosphotransferase AK3, mitochondrial	Q9UIJ7;E7ET30;Q9UIJ7-2	27.8204	28.2565	28.2027	28.336	28.6234	28.5028		0.515627	0.757139		0.366862	0.618911		0.300092	0.794431			0.429451		27.8019	27.9202	27.7389	28.3066	28.0557	28.4073	28.5014	28.524	27.5826	28.17	28.1652	28.1115	28.8973	28.8623	28.5426	28.5609	28.5278	28.6663	28.4668	28.267	28.611
AKAP10	A-kinase anchor protein 10, mitochondrial	O43572;E7EMD6	24.1192	23.7469	23.1544	23.8993	23.8892	23.3572		-0.21991	0.887846		0.142294	0.948955		0.202858	0.956114			0.913547		23.8764	24.0772	24.4041	23.3645	23.3239	24.5522	22.6566	24.1095	22.697	23.7594	24.5522	23.6209	23.6649	23.9316	23.6431	23.5522	24.4298	23.9316	23.9847	21.4193	24.0935
AKR1A1	Alcohol dehydrogenase [NADP(+)]	P14550;Q5T621	28.8596	29.0338	29.0499	29.0799	29.2075	29.2285		0.220222	0.784006		0.173694	0.796528		0.178574	0.832847			0.753194		29.114	28.7357	28.7292	29.2625	28.8385	29.0004	29.4433	28.9869	28.7195	29.1015	29.1115	29.1115	28.995	29.109	29.141	29.3536	29.2262	29.104	29.2512	29.1015	29.4571
AKR1B1	Aldose reductase	P15121;E9PCX2	28.8569	28.8175	28.8132	28.635	28.8113	28.7868		-0.221914	0.814619		-0.00619507	0.993063		-0.0264349	0.951091			0.8938		29.0164	28.9539	28.6004	28.9259	28.8534	28.673	28.8324	28.7389	28.8682	28.4512	28.7895	28.8324	28.4668	28.6285	28.9428	28.9316	28.7421	28.8294	28.6931	28.965	28.6595
AKR7A2	Aflatoxin B1 aldehyde reductase member 2	O43488;H3BLU7	30.6728	30.533	30.4658	30.6065	30.5612	30.6008		-0.0662476	0.942494		0.0282063	0.964203		0.134972	0.804149			0.942399		30.8608	30.5203	30.6372	30.7129	30.4727	30.4134	30.1842	30.6198	30.5934	30.8309	30.611	30.7533	30.2308	30.7129	30.4727	30.5203	30.5389	30.6285	30.4823	30.5389	30.7533
AKT1	RAC-alpha serine/threonine-protein kinase	P31749;B7Z5R1	26.3955	26.1198	25.9944	25.806	25.9689	25.9226		-0.589513	0.776856		-0.150949	0.950617		-0.0718826	0.950924			0.912596		26.3066	26.4122	26.4676	25.8215	26.3795	26.1585	25.7543	26.2335	25.9955	25.4041	25.8336	25.6622	26.3239	25.5667	25.3031	26.9202	26.0854	25.6784	26.0338	25.6068	26.3712
AKT2	RAC-beta serine/threonine-protein kinase	P31751;B3KP61;Q0VAN0;C9K000	27.2562	27.1228	27.0661	27.02	27.0781	27.0821		-0.236233	0.831036		-0.0446475	0.974373		0.016054	0.974304			0.938195		27.217	27.2625	27.2891	26.8264	27.2354	27.3066	27.1795	27.1214	26.8973	26.8142	27.3578	26.965	26.9428	27.3828	26.7389	27.1507	27.0401	26.8973	27.2714	27.217	26.9428
AKT3	RAC-gamma serine/threonine-protein kinase	Q9Y243-2;Q9Y243	23.672	23.9376	23.6057	23.4997	24.0782	23.8449		-0.172269	0.960796		0.140628	0.96872		0.239144	0.957583			0.99719		23.976	24.417	22.623	24.1719	24.4676	23.1733	24.9089	23.8155	22.0928	24.8288	23.06	23.2019	22.9081	24.8433	24.5463	23.4536	23.4698	24.6264	24.9361	22.944	22.873
ALAD	Delta-aminolevulinic acid dehydratase	P13716;P13716-2	30.6989	30.7069	30.7669	30.8173	31.1157	31.0091		0.118418	0.878985		0.408823	0.627501		0.242256	0.601254			0.425895		30.8157	30.5844	30.6964	30.6458	30.4532	31.0217	30.8459	30.5573	30.8973	30.6798	31.1483	30.7613	30.6798	31.2591	31.0544	31.1544	30.995	30.9609	31.1604	30.8608	31.0544
ALDH16A1	Aldehyde dehydrogenase family 16 member A1	Q8IZ83;Q8IZ83-3;F8WBH3;F5H4B6	29.2738	29.5272	29.435	29.3654	29.3818	29.5059		0.0915918	0.844107		-0.145432	0.835862		0.070909	0.883831			0.838257		29.3325	29.2399	29.249	29.4154	29.3971	29.7692	29.4785	29.2913	29.5352	29.2647	29.3766	29.5555	29.2647	29.249	29.267	29.6831	29.3282	29.5203	29.3452	29.7227	29.4354
ALDH1A1	Retinal dehydrogenase 1	P00352;H0Y4S2	27.555	27.3561	27.4065	27.6628	27.534	27.5188		0.10778	0.810221		0.177884	0.851788		0.112316	0.892675			0.906229		27.5826	27.4785	27.604	27.3153	27.0401	27.7129	27.4551	27.4234	27.341	27.5463	27.7195	27.726	27.6595	27.6181	27.7064	27.632	27.1795	27.4862	27.9316	27.141	27.5165
ALDH4A1	Delta-1-pyrroline-5-carboxylate dehydrogenase, mitochondrial	D2D4A3;P30038;P30038-2	24.3989	24.6519	25.0268	25.4665	25.4206	25.6947		1.06759	0.569085		0.768734	0.295747		0.667854	0.588463		+	0.0377779		24.317	24.3511	24.5285	24.6971	24.632	24.6264	24.5105	25.7077	24.8623	25.5225	25.0233	25.5255	25.7945	25.3031	25.1371	25.7286	25.5135	25.6237	25.5926	25.9111	25.6513
ALDH9A1	4-trimethylaminobutyraldehyde dehydrogenase	P49189;B4DXY7	27.1096	27.1027	27.0289	27.3313	27.3105	27.2077		0.221674	0.795297		0.207782	0.84885		0.178875	0.797998			0.891078		27.0296	27.0914	27.2077	26.6865	27.4234	27.1984	26.9202	26.9869	27.1795	27.189	27.4551	27.1795	27.5014	27.6595	26.9539	27.3662	27.2625	26.8504	27.2714	27.2077	27.5014
ALDOA	Fructose-bisphosphate aldolase A;Fructose-bisphosphate aldolase	P04075;H3BQN4;H3BPS8;H3BUH7;H3BR04	34.2951	34.404	34.4656	34.3091	34.4078	34.3869		0.0140111	0.976492		0.00377623	0.994622		-0.078771	0.82934			0.846266		34.4396	34.2193	34.2265	34.4209	34.402	34.3892	34.5238	34.3033	34.5698	34.2619	34.1901	34.4146	34.3698	34.3633	34.3502	34.6144	34.3033	34.2759	34.3956	34.5062	34.3698
ALDOC	Fructose-bisphosphate aldolase C;Fructose-bisphosphate aldolase	P09972;B7Z1N6;B7Z3K7;A8MVZ9	27.7925	28.0502	27.95	28.0316	27.9551	28.0595		0.23908	0.807861		-0.0951354	0.919859		0.10955	0.798549			0.912599		27.5898	27.7581	28.0296	27.7833	28.0137	28.3536	27.9202	27.7645	28.1652	28.0453	28.2077	27.8973	27.976	28.2847	27.8799	28.003	27.6527	27.976	28.1507	28.0505	28.0608
ALOX12	Arachidonate 12-lipoxygenase, 12S-type	P18054	32.4948	32.5907	32.5134	32.4241	32.4835	32.4891		-0.0707273	0.815603		-0.107188	0.842137		-0.0242548	0.964121			0.922531		32.5911	32.4775	32.4159	32.6372	32.4384	32.6964	32.6501	32.3489	32.5412	32.4702	32.4532	32.3672	32.4058	32.6437	32.3223	32.5296	32.4384	32.2731	32.4654	32.499	32.7191
AMDHD2	Putative N-acetylglucosamine-6-phosphate deacetylase	Q9Y303;Q9Y303-2;Q9Y303-3;H3BTZ6;H3BSV9	25.7922	23.2416	25.2748	23.6086	24.6672	23.7736		-2.18355	0.745939		1.42559	0.836107		-1.50117	0.761003			0.832966		25.7543	26.0526	25.5696	26.0588	21.2127	22.4535	25.5926	25.9066	24.3252	22.12	23.6416	25.7312	22.9417	22.9709	25.7895	23.6586	26.2499	23.2836	21.753	26.3745	23.6835
AMPD2	AMP deaminase 2	H0Y360;Q01433;Q01433-2;E9PNG0;Q01433-3;Q01433-4	30.4572	30.4781	30.4801	30.4794	30.4653	30.5455		0.0221378	0.970998		-0.012828	0.988776		0.0654098	0.759738			0.991273		30.4032	30.393	30.5754	30.4032	30.5296	30.5014	30.4234	30.5934	30.4234	30.5296	30.6022	30.5664	30.2193	30.6544	30.5573	30.3515	30.2979	30.5754	30.5014	30.5296	30.5754
ANGPT1	Angiopoietin-1	Q15389;E7ERK4;B4DTQ9	26.9277	26.8649	26.828	27.2265	26.3321	26.5771		0.298798	0.849377		-0.532839	0.642669		-0.25088	0.69275			0.218016		26.7389	26.6865	27.3578	26.5255	27.1604	26.9089	26.8623	26.6458	26.976	27.611	26.9977	27.3325	26.965	26.0233	26.3992	26.4953	26.4105	26.5667	26.4999	26.8741	26.3679
ANK1	Ankyrin-1	P16157-10;P16157-8;P16157-5;P16157-16;P16157-3;P16157;P16157-12;P16157-14;P16157-11;P16157-9;P16157-6;P16157-7;P16157-4;P16157-13;P16157-15;P16157-21;E7EVX7;P16157-2	29.506	29.5565	29.483	29.6918	29.6873	29.6431		0.185792	0.778123		0.130792	0.871877		0.160087	0.785292			0.908333		29.6475	29.3787	29.4919	29.7211	29.1984	29.7502	29.6697	29.2422	29.5371	29.6475	29.7739	29.6915	29.6544	29.7942	29.5278	29.9259	29.5014	29.4354	29.6831	29.6595	29.7942
ANKFY1	Rabankyrin-5	I3L2C5;Q9P2R3;Q9P2R3-2;Q9P2R3-4;F5H754	26.6736	26.8541	26.8092	26.7674	26.8627	26.7159		0.0938474	0.872312		0.008636	0.991316		-0.0933447	0.818877			0.890256		26.8142	26.7389	26.4676	26.9428	26.5898	27.0296	26.8142	26.9539	26.6595	26.7129	26.9202	26.7771	26.6595	26.9316	26.726	26.9428	26.8504	26.5754	26.726	26.6998	26.8623
ANKMY2	Ankyrin repeat and MYND domain-containing protein 2	Q8IV38;G3V0G5	25.5299	25.434	25.7681	25.4565	25.5164	25.8289		-0.0733953	0.914273		0.0823514	0.90321		0.060805	0.941524			0.55354		25.5463	25.4394	25.604	25.3811	25.1795	25.7415	25.8288	25.48	25.9955	25.3545	25.5285	25.726	25.217	25.6012	25.3712	25.604	25.4892	25.5754	25.9225	25.9089	25.9089
ANKRD13A	Ankyrin repeat domain-containing protein 13A	Q8IZ07;H0YIN8	25.8898	25.5901	25.7589	25.8114	25.7415	25.6782		-0.0783564	0.923		0.151467	0.881817		-0.080705	0.919114			0.935182		25.6096	26.1623	25.8973	25.3239	25.6971	25.7492	25.433	26.0691	25.7746	25.9361	25.9825	25.673	25.654	26.0401	25.4676	26.0608	25.3975	25.6181	25.8834	25.48	25.7312
ANKRD28	Serine/threonine-protein phosphatase 6 regulatory ankyrin repeat subunit A	O15084-4;O15084;O15084-1;O15084-2;B4DIW9	26.7239	26.5861	26.8185	26.6915	26.7565	26.8126		-0.0323671	0.918538		0.170368	0.798586		-0.0059042	0.987494			0.781703		26.7518	26.6181	26.8019	26.4425	26.5898	26.726	26.8019	26.9539	26.6998	26.5898	26.7645	26.673	26.7389	26.6595	26.726	27.0084	26.632	26.8142	26.7389	26.9977	26.6998
ANKS1A	Ankyrin repeat and SAM domain-containing protein 1A	Q92625;Q05CP0	26.2279	25.9258	26.1494	26.2268	26.0072	26.2457		-0.00118001	0.99745		0.0814622	0.951543		0.0962845	0.89618			0.910171		26.6181	26.2589	25.8069	25.5492	25.7746	26.4536	26.1095	26.0691	26.2696	26.317	26.6181	25.9361	26.0359	26.0062	25.9089	25.895	26.2188	26.1546	26.6458	26.2151	25.9672
ANO6	Anoctamin-6	E9PB30;Q4KMQ2;Q4KMQ2-2;E9PCT2	27.3545	27.5043	27.7703	27.1271	27.0684	27.2117		-0.227403	0.918927		-0.435927	0.705029		-0.558665	0.48052			0.799738		27.3066	27.3578	27.3992	27.4234	27.611	27.4785	27.7064	27.9316	27.673	26.48	26.604	27.2262	28.1984	27.4629	26.7129	26.8623	27.2354	27.0401	27.3662	26.9089	27.5315
ANP32B	Acidic leucine-rich nuclear phosphoprotein 32 family member B	Q92688-2;Q92688;Q5T6W8	23.4158	24.7661	24.5845	22.7657	23.9821	23.8276		-0.650138	0.894214		-0.784062	0.840515		-0.756963	0.77484			0.704705		23.2938	24.4425	22.5112	24.6431	24.8909	24.7645	24.604	24.4738	24.6757	22.7112	20.9526	23.1312	24.2678	24.2755	22.0496	25.1293	24.4738	22.2766	23.9695	24.6153	24.4488
ANXA1	Annexin A1;Annexin	P04083;Q5T3N1	27.2013	27.1657	27.1813	27.1545	26.9565	26.9526		-0.0468171	0.973495		-0.209226	0.856826		-0.228717	0.876091			0.971794		27.4629	26.632	27.509	27.0914	26.726	27.6798	27.1604	26.8973	27.4862	27.2354	27.3578	26.8741	27.1507	27.2803	26.9428	26.7645	26.8385	26.9089	27.4073	26.2317	27.2625
ANXA11	Annexin A11	E9PDK5;B4DVE7;P50995	30.2343	30.3327	30.2857	30.3664	30.3171	30.3056		0.132165	0.871853		-0.0156134	0.988083		0.0198615	0.966166			0.992168		30.2077	30.2759	30.2193	30.2077	30.2422	30.5481	30.3515	30.2077	30.2979	30.2422	30.7533	30.2979	30.1724	30.5109	30.1842	30.3196	30.2535	30.1483	30.4433	30.1483	30.4823
ANXA2	Annexin;Annexin A2;Putative annexin A2-like protein	H0YN42;P07355;H0YMM1;H0YKS4;H0YMD0;H0YMU9;P07355-2;A6NMY6;H0YKL9;H0YKZ7;H0YLV6;H0YMT9;H0YKX9;H0YKV8;H0YMW4;H0YM50	25.5722	25.3684	25.284	25.282	25.2859	24.9076		-0.290218	0.845211		-0.0824962	0.921287		-0.376366	0.876787			0.914828		25.8741	25.5255	25.317	25.5926	25.4394	25.0732	25.6292	25.5045	24.7182	25.4105	25.3239	25.6649	24.7286	25.4583	24.9933	25.2463	25.4457	25.8069	23.7995	25.3376	24.6865
ANXA3	Annexin A3;Annexin	P12429;D6RA82	28.921	28.7313	28.8896	28.7379	28.7061	28.7489		-0.183084	0.851159		-0.0251659	0.967776		-0.140768	0.80046			0.915822		28.995	28.7357	29.0322	28.7421	28.5573	28.8945	28.8415	28.6865	29.141	28.965	28.9787	28.3828	28.6251	28.6181	28.7453	28.805	28.6561	28.7771	28.7292	28.5718	28.9174
ANXA4	Annexin A4;Annexin	P09525;Q6P452;B4DDF9	28.7891	28.9358	28.8726	28.9403	28.8681	28.9167		0.151146	0.890686		-0.0677005	0.899014		0.0440461	0.94744			0.988426		28.8799	28.7389	28.7486	28.8234	29.21	28.7739	29.0111	28.8142	28.7927	28.8945	29.4174	28.8173	28.632	28.7833	28.9174	28.8887	28.8829	28.7031	29.1312	28.8294	29.003
ANXA5	Annexin A5;Annexin	P08758;E7ENQ5;D6RBL5;D6RBE9;E9PHT9	29.8788	29.6321	29.3985	29.5221	29.5836	29.4553		-0.356705	0.911465		-0.0484449	0.986602		0.0567428	0.958981			0.986173		30.8234	29.5371	29.2759	29.9539	29.5555	29.3869	29.94	29.4413	28.8142	29.9117	30.4234	29.2216	28.5315	29.7864	29.0217	30.2308	29.2957	29.3388	29.4727	29.5682	29.4413
ANXA6	Annexin A6;Annexin	A6NN80;E9PGK1;P08133;B7Z582;E5RK69;E7EMC6	25.0136	24.0656	24.4225	25.1346	24.8251	24.1163		0.120993	0.898189		0.75951	0.835767		-0.306206	0.95248			0.915868		25.0732	24.7543	25.2133	24.8433	22.1777	25.1757	25.1719	23.111	24.9847	24.9361	25.2678	25.4073	24.9271	24.9803	25.065	25.0233	24.2317	24.8717	24.9977	24.7234	21.8726
ANXA7	Annexin;Annexin A7	B4DT77;B4DHY4;P20073-2;P20073	30.1818	30.2886	30.3673	30.1999	30.2741	30.3486		0.0181049	0.979577		-0.0145308	0.989769		-0.0187715	0.96502			0.918302		30.1361	30.2979	30.1115	30.341	30.1115	30.4134	30.4629	30.3088	30.3303	30.0217	30.5296	30.2535	29.995	30.1483	30.1724	30.5109	30.2647	30.1115	30.4629	30.2535	30.5664
AP1B1	AP-1 complex subunit beta-1	Q10567-2;Q10567	30.7156	30.7524	30.7822	30.8702	31.0452	31.0116		0.154659	0.817186		0.292804	0.355066		0.229409	0.30669			0.0707295		30.6285	30.8385	30.6798	30.7292	30.7047	30.8234	30.8004	30.7771	30.7692	30.933	30.8756	30.7047	30.9677	31.1724	30.9539	30.9746	31.08	31.0017	30.9539	30.9609	31.13
AP1G1	AP-1 complex subunit gamma-1	B3KXW5;O43747;O43747-2;E7EUH1;F5GZV5	29.5553	29.5697	29.5992	29.5722	29.8774	29.8073		0.0169493	0.970305		0.307687	0.63523		0.208078	0.521741			0.259667		29.4492	29.5916	29.6251	29.4473	29.6578	29.604	29.4823	29.7309	29.5844	29.5682	29.7581	29.4919	29.4707	30.1239	29.7064	29.9259	29.7533	29.837	29.9117	29.7096	29.7708
AP1G2	AP-1 complex subunit gamma-like 2	O75843;B4E3E1;Q86V28	26.2928	26.4715	26.4304	26.4315	26.5839	26.5225		0.138696	0.87991		0.112363	0.84193		0.0920892	0.884703			0.892288		26.1642	26.527	26.1871	26.275	26.4938	26.6458	26.6458	26.5359	26.1095	26.3307	26.1312	26.6181	26.6458	26.4298	26.5463	26.673	26.6865	26.4645	26.3894	26.6181	26.6181
AP1M1	AP-1 complex subunit mu-1	Q9BXS5;Q9BXS5-2;B4DDG7;E7ENJ6	29.0572	29.1313	29.025	29.2287	29.2609	29.303		0.171454	0.847789		0.129671	0.755735		0.277984	0.485389			0.68783		29.2007	28.9869	28.9841	29.17	29.0634	29.1604	28.8712	29.0557	29.1483	28.9869	29.588	29.2535	29.0864	29.4254	29.1459	29.2647	29.2077	29.2913	29.4551	29.258	29.2077
AP1S1	AP-1 complex subunit sigma-1A	P61966;H7C1E4;P61966-2	25.9664	25.8887	26.163	25.5884	26.0609	26.064		-0.377954	0.768788		0.172187	0.841786		-0.0990001	0.909898			0.529403		26.1115	25.9066	25.8811	26.17	25.8504	25.6458	26.4425	25.8881	26.1585	25.6513	25.5404	25.2856	25.8764	26.2408	25.8858	25.9225	26.1946	25.9473	25.797	26.0567	26.4551
AP1S2	AP-1 complex subunit sigma-2	P56377;A6NH01;H7BZG6;H0Y673;E9PE78;B7Z3M9;B4DSU4	27.1245	27.2608	27.4208	26.8321	27.0471	27.0939		-0.292421	0.814909		-0.213651	0.844397		-0.326892	0.66028			0.589294		27.3494	27.0813	26.9428	26.8741	27.2625	27.6458	27.4938	27.2979	27.4707	26.5463	26.8623	26.8385	27.0813	26.9869	27.0401	27.2077	26.9539	26.9202	27.1984	26.8019	27.4551
AP2A1	AP-2 complex subunit alpha-1	O95782-2;O95782	30.2187	30.2589	30.274	30.3252	30.4281	30.3621		0.106557	0.864077		0.169208	0.698712		0.0880828	0.770371			0.79046		30.2535	30.2422	30.1604	30.1604	30.2647	30.3515	30.3088	30.341	30.1724	30.2647	30.6022	30.2979	30.1361	30.5481	30.341	30.4823	30.341	30.2308	30.4334	30.341	30.4433
AP2A2	AP-2 complex subunit alpha-2	O94973;O94973-2;C9J1S3;O94973-3;E9PJJ7;E7ESQ4	26.7294	26.7687	26.9518	26.7925	26.9458	26.7962		0.0630956	0.93134		0.177171	0.843387		-0.155615	0.877781			0.939423		26.5754	26.5624	27.0505	26.7518	26.5566	26.9977	26.9202	26.6998	27.2354	26.632	26.8504	26.8019	26.8858	26.8504	26.6458	27.2262	27.0608	26.4969	26.5433	26.965	27.1795
AP2B1	AP-2 complex subunit beta	P63010;P63010-2;Q7Z451;F5GYG9	29.4671	29.2668	29.2472	29.3846	29.4222	29.474		-0.0825661	0.848856		0.155416	0.662857		0.226774	0.660317			0.636214		29.3971	29.5296	29.4746	29.3683	29.1628	29.2692	29.2781	29.2935	29.17	29.3787	29.5203	29.4154	29.2239	29.4433	29.4919	29.4274	29.326	29.4668	29.6931	29.2007	29.5352
AP2M1	AP-2 complex subunit mu	E9PFW3;Q96CW1-2;Q96CW1;F5H0H0;B4DJB1;C9JJ47	27.8882	28.068	27.9983	27.9457	28.1586	28.1688		0.0574819	0.955217		0.0905434	0.892629		0.170491	0.526761			0.790184		27.9869	27.9259	27.7518	27.9146	28.0137	28.2759	27.9977	28.1115	27.8858	27.9595	28.3325	27.7453	27.7453	28.4591	28.0296	28.1214	28.0243	28.0965	28.1263	28.2308	28.2216
AP2S1	AP-2 complex subunit sigma	P53680;P53680-2	27.0167	26.7212	26.8036	26.8572	27.0203	26.8343		-0.159533	0.850068		0.299073	0.670312		0.0307401	0.953357			0.712044		26.7389	27.1604	27.1507	26.5898	26.6998	26.8741	26.9869	26.7645	26.6595	26.8385	27.0296	26.8741	26.6865	27.2891	26.9202	26.8741	26.9977	26.9089	26.7771	26.6865	26.965
AP3B1	AP-3 complex subunit beta-1	E5RJ68;O00203;F5GXG9;F5H093	28.4834	28.4101	28.4941	28.5075	28.5821	28.591		0.024068	0.958509		0.171995	0.640025		0.0968296	0.792603			0.769707		28.4785	28.6181	28.3536	28.3325	28.4785	28.4194	28.4512	28.3992	28.632	28.5718	28.5536	28.3992	28.5052	28.6424	28.4707	28.5389	28.6764	28.4862	28.6865	28.5014	28.6898
AP3D1	AP-3 complex subunit delta-1	O14617;O14617-5;O14617-4;G5E988;O14617-2;E7EMM2;O14617-3	28.2519	28.2434	28.229	28.2656	28.2843	28.2609		0.0136568	0.97143		0.0408745	0.957546		0.031937	0.956064			1		28.1937	28.1507	28.4113	28.2625	28.17	28.2979	28.267	28.2077	28.2123	28.2847	28.2979	28.2535	28.2262	28.5014	28.0401	28.1604	28.4354	28.1263	28.4274	28.0349	28.4551
AP3M1	AP-3 complex subunit mu-1	Q9Y2T2	28.2268	28.3731	28.2591	28.176	28.0072	28.1839		-0.0508003	0.955816		-0.365887	0.641337		-0.075209	0.912112			0.846801		28.0864	28.0813	28.5128	28.3662	28.362	28.391	28.1459	28.5052	28.1263	28.341	28.267	28.2759	27.8203	28.2308	27.6865	28.141	27.9705	28.2445	28.267	27.8623	28.362
AP3S1	AP-3 complex subunit sigma-1	Q92572	26.5589	26.6954	26.5774	26.7315	26.586	26.5746		0.172592	0.821398		-0.109407	0.869486		-0.00277185	0.997543			0.912718		26.4692	26.632	26.5754	26.7518	26.8623	26.4723	26.7771	26.3511	26.604	26.632	26.574	26.9428	26.7771	26.8142	26.4441	26.6998	26.3861	26.5696	26.7389	26.4614	26.5285
AP4B1	AP-4 complex subunit beta-1;AP complex subunit beta	Q9Y6B7;B1ALD0;B7Z4X3	24.2623	23.9078	23.1158	24.3311	23.9756	24.1452		0.0687583	0.964982		0.0677244	0.985007		1.02941	0.690902			0.756264		23.6022	24.8336	24.3511	24.0691	23.3101	24.3443	21.7793	24.217	23.3511	24.2096	24.5225	24.3031	24.2891	24.0691	23.1244	24.0935	24.6153	24.6209	24.0608	23.7895	24.1095
AP4M1	AP-4 complex subunit mu-1	C9IZL5;C9JC87;O00189;H7C0A0;H7BZV3;C9JWL4	23.4672	23.1617	23.8869	23.6147	23.2077	23.333		0.147522	0.95841		0.0459215	0.988564		-0.553847	0.744848			0.915767		23.5638	22.9707	23.867	23.5983	22.8064	23.0805	23.3645	24.1166	24.1795	23.4923	23.7077	24.6004	22.6585	23.5686	23.1045	22.2171	23.9406	22.8949	24.2504	23.1569	23.0299
APAF1	Apoptotic protease-activating factor 1	O14727-4;O14727;C9JLV4;O14727-3;O14727-2;O14727-5	26.657	26.6899	26.685	27.0601	27.1217	27.0019		0.403088	0.818964		0.431751	0.712378		0.316934	0.277429			0.621706		26.673	26.7771	26.521	26.6458	26.6595	26.7645	26.7771	26.632	26.6458	27.5682	27.3325	26.7645	26.5754	27.5609	27.0914	26.7129	27.1214	27.0608	27.0505	26.9202	26.976
APEH	Acylamino-acid-releasing enzyme	C9JIF9;P13798;H7C393;H7C1U0	23.7098	23.4874	24.7251	25.2608	24.793	25.1662		1.55098	0.794593		1.30557	0.776429		0.441059	0.670735			0.592076		24.6486	24.5285	21.9523	24.3511	24.558	21.5531	24.5165	25.1604	24.4984	24.9847	24.8858	25.4234	25.7492	25.2058	25.0148	24.7492	24.2021	25.2714	25.5285	24.8288	25.0359
APLP2	Amyloid-like protein 2	F5GZY0;Q06481-3;H7BXI4;Q06481;Q06481-4;Q06481-2;Q06481-5;F5H845	26.7611	26.6052	26.5778	26.4894	26.607	26.4626		-0.271671	0.858843		0.00180419	0.998508		-0.115206	0.896059			0.944348		26.5359	26.6865	27.0608	26.4846	26.6181	26.7129	26.2463	26.5898	26.8973	26.7771	25.8927	26.8741	26.4138	26.8858	26.3629	26.604	26.5754	26.3205	26.329	26.8264	26.3745
APMAP	Adipocyte plasma membrane-associated protein	H0Y512;Q9HDC9-2;Q9HDC9	24.1784	23.5642	24.9321	23.246	24.2023	24.1315		-0.93243	0.855749		0.638083	0.780127		-0.800661	0.710133			0.799928		23.8875	24.4234	24.2244	23.1304	23.0885	24.4738	24.317	25.8811	24.5983	21.074	24.3177	22.8585	24.7338	24.4298	23.8635	23.9756	24.5404	24.1536	24.4551	23.2469	24.6703
APOA1	Apolipoprotein A-I;Proapolipoprotein A-I;Truncated apolipoprotein A-I	P02647;F8W696	30.2155	29.9364	30.6194	30.387	30.5163	30.4219		0.171513	0.931608		0.57991	0.484726		-0.19741	0.923582			0.914482		30.5844	29.7973	30.2647	30.0349	29.877	29.8973	30.2077	31.6964	29.9539	30.7613	31.0673	29.8264	29.893	30.4919	30.5389	30.8385	30.196	30.3303	30.4823	30.3088	30.5664
APOA1BP	NAD(P)H-hydrate epimerase	Q8NCW5-2;Q8NCW5;Q5T3I4	27.6326	27.4853	27.661	27.5798	27.6751	27.6761		-0.0528456	0.923062		0.189812	0.809187		0.0151599	0.980607			0.932062		27.5014	27.7645	27.632	27.6251	27.4073	27.4234	27.8081	27.8858	27.2891	27.6595	27.6798	27.6389	27.341	27.7453	27.6998	27.8973	27.3578	27.7518	27.7195	27.5536	27.6798
APOA2	Apolipoprotein A-II;Proapolipoprotein A-II;Truncated apolipoprotein A-II	P02652	25.1961	24.3252	24.4403	24.8567	25.2224	24.6699		-0.339377	0.896268		0.897218	0.83548		0.229594	0.946119			0.930929		25.8044	24.9406	24.8433	25.4892	24.1332	23.3531	23.867	25.867	23.5869	25.8409	24.945	24.1795	24.4614	23.7583	25.1253	27.0084	24.9977	24.7945	24.2244	25.0233	24.6376
APOA4	Apolipoprotein A-IV	P06727	25.9984	26.5934	26.558	26.6981	27.0023	26.7709		0.699687	0.770334		0.408814	0.775435		0.212903	0.861061			0.497717		26.0443	25.7619	26.189	26.2979	26.5285	26.9539	26.2625	27.1507	26.2607	27.2979	26.7771	26.3545	26.3629	27.141	27.391	26.965	26.512	26.4877	26.8623	26.9316	26.8019
APOB	Apolipoprotein B-100;Apolipoprotein B-48	P04114;F5H109	28.063	27.8786	28.1098	27.5499	27.1045	27.1767		-0.513064	0.794158		-0.774053	0.555049		-0.933139	0.588293			0.325724		27.5754	28.3828	28.2308	27.4862	27.9372	28.2123	27.3325	29.0375	27.9595	27.7129	27.6798	27.189	27.6181	27.2077	26.7771	27.3828	27.0505	27.2445	27.17	26.9428	27.3494
APOBEC3C	DNA dC->dU-editing enzyme APOBEC-3C	Q9NRW3	24.3716	24.1845	23.8728	24.2078	24.478	24.5902		-0.163865	0.922834		0.293509	0.775063		0.717408	0.453647			0.691481		24.1871	24.019	24.9089	23.8858	24.1332	24.5344	24.0105	23.632	23.976	23.7077	24.141	24.1488	24.8336	24.3031	24.4362	24.4234	24.7492	24.9847	24.317	24.7492	24.3101
APOBEC3G	DNA dC->dU-editing enzyme APOBEC-3G	Q9HC16	26.0797	25.7993	25.6559	25.4691	24.911	25.9971		-0.610542	0.892231		-0.888262	0.878153		0.34116	0.915178			0.960654		26.2517	25.7796	26.2077	25.2463	25.9912	26.1604	25.1719	26.0935	25.7024	23.3439	26.3695	26.0084	26.1546	26.2354	26.0588	25.8433	21.5067	26.2225	26.673	24.1954	26.8973
APOBR	Apolipoprotein B receptor	Q0VD83;H3BU97;C9J815;Q0VD83-3	25.7997	25.8057	25.8459	25.4711	25.5235	25.7085		-0.328558	0.815259		-0.282166	0.826416		-0.137445	0.906171			0.90191		25.4923	25.8834	26.0233	26.1449	25.3205	25.9517	26.0484	25.6998	25.7895	25.2426	25.4707	25.2463	25.9248	25.6757	25.275	25.5225	25.6209	26.1075	25.8264	25.0567	25.8433
APOC1	Apolipoprotein C-I;Truncated apolipoprotein C-I	P02654	22.9882	23.1766	23.716	23.445	23.7681	23.79		0.456837	0.878288		0.591582	0.756479		0.0740205	0.965263			0.841442		22.9675	23.2127	22.7843	23.9495	22.7946	22.7856	23.6209	24.2803	23.2467	24.7995	22.894	23.3104	22.7761	23.7077	23.7437	23.9672	23.654	24.1015	23.3496	24.3778	23.3312
APOC2	Apolipoprotein C-II;Proapolipoprotein C-II	P02655	23.3297	23.352	23.7915	24.7397	23.6665	23.3275		1.41008	0.819068		0.31454	0.842202		-0.46395	0.869058			0.790494		23.506	22.3264	24.1565	23.8288	23.0558	23.1712	23.1033	24.6281	23.6431	26.7518	24.5145	24.1642	23.5285	23.632	24.1015	23.852	23.0805	22.5383	24.5268	22.9507	23.2942
APOC3	Apolipoprotein C-III	P02656	25.6248	24.7118	26.5709	26.712	26.49	25.9314		1.08726	0.895188		1.77825	0.776043		-0.639506	0.88638			0.913282		25.8481	25.4394	25.5869	25.4707	23.3101	25.3545	25.3778	28.9705	25.3645	30.5014	26.3084	25.8288	24.2096	26.2262	25.6944	28.9259	25.1135	26.0338	25.5014	26.0711	26.1194
APOE	Apolipoprotein E	P02649;H0Y7L5;E9PEV4;E7ERP7	27.64	27.5498	27.4571	27.3592	27.5179	27.5302		-0.280859	0.65273		-0.031923	0.984032		0.073149	0.949071			0.931996		27.5682	27.6389	27.7129	27.7195	27.5389	27.391	27.2979	27.8019	27.2714	27.4862	27.4073	27.1604	27.3828	27.0608	27.7895	27.7581	27.4629	27.9259	27.341	27.2714	27.5826
APOH	Beta-2-glycoprotein 1	P02749	25.8776	25.6741	26.2907	26.958	26.9201	27.0904		1.08037	0.592684		1.24601	0.280095		0.799718	0.341192		+	0.00516354		26.1273	25.4738	26.0317	26.1035	25.4266	25.4923	26.204	26.3153	26.3528	26.9539	26.5754	27.0401	27.2625	26.9316	26.9428	26.6458	27.1604	27.3239	26.632	27.2262	27.1795
APP	Amyloid beta A4 protein;N-APP;Soluble APP-alpha;Soluble APP-beta;C99;Beta-amyloid protein 42;Beta-amyloid protein 40;C83;P3(42);P3(40);C80;Gamma-secretase C-terminal fragment 59;Gamma-secretase C-terminal fragment 57;Gamma-secretase C-terminal fragment 50;C31	B4DII8;P05067-8;P05067;P05067-7;P05067-9;E9PEV0;P05067-4;P05067-6;E9PG40;P05067-3;P05067-5;P05067-10;H7C0V9	30.4903	30.3121	30.4003	30.3817	30.312	30.0356		-0.108588	0.914221		-0.000128905	0.999345		-0.364672	0.379259			0.629409		30.4334	30.4532	30.5844	30.2979	30.2869	30.3515	30.2979	30.3828	30.5203	30.7292	29.9259	30.5203	30.3515	30.341	29.9539	30.5296	30.4234	29.8638	30.1724	30.1115	29.995
APPL1	DCC-interacting protein 13-alpha	Q9UKG1	27.8385	27.8641	28.0107	28.042	28.0355	28.0056		0.203526	0.823393		0.17147	0.810019		-0.00512425	0.991874			0.876723		27.7195	28.019	27.7771	27.7518	27.9089	27.9316	27.9539	27.8203	28.258	28.1361	28.2262	27.9259	27.8799	27.8564	28.019	28.3239	27.9428	27.8504	28.0557	27.9705	28.1459
APPL2	DCC-interacting protein 13-beta	Q8NEU8;F8W1P5;F5GZG0	30.4157	30.437	30.443	30.5126	30.6172	30.5994		0.0969394	0.895998		0.180246	0.775543		0.156414	0.735813			0.859965		30.4334	30.4727	30.341	30.2759	30.3303	30.7047	30.4032	30.4433	30.4823	30.3303	30.8534	30.4234	30.4433	30.6285	30.5573	30.6458	30.6372	30.5844	30.8157	30.3515	30.6458
APRT	Adenine phosphoribosyltransferase	P07741;H3BQZ9;G5E9J2;H3BQB1;H3BQF1	30.9794	31.048	30.9305	31.031	31.0089	31.0571		0.0515658	0.957202		-0.03909	0.981812		0.126565	0.745333			0.999801		31.0544	30.8756	31.0084	30.8157	30.8081	31.5203	30.947	30.9046	30.94	31.2077	31.2979	30.7211	30.8973	31.1664	30.7533	31.1483	30.9677	30.947	31.0544	30.94	31.2869
ARAF	Serine/threonine-protein kinase A-Raf	P10398	26.0169	25.9435	25.9367	25.9035	25.8667	25.6786		-0.113426	0.898008		-0.0768323	0.904012		-0.258036	0.895592			0.97556		25.8623	26.1546	26.0338	26.067	26.0401	25.7234	25.8264	26.3712	25.6125	25.7338	26.0732	26.2058	25.6012	25.7415	26.0588	25.673	25.9933	25.8599	26.3595	24.6376	25.8576
ARAP1	Arf-GAP with Rho-GAP domain, ANK repeat and PH domain-containing protein 1	Q96P48-3;Q96P48;E7EU13;Q96P48-2;Q96P48-4;Q96P48-1;Q96P48-7;Q96P48-5	30.1114	29.9363	30.0429	30.098	30.0647	30.0766		-0.0134152	0.952271		0.128457	0.835335		0.0336232	0.948861			0.914169		30.099	30.1361	30.099	29.7373	29.8872	30.1842	29.995	30.099	30.0349	30.1361	30.099	30.1483	30.0084	30.2647	29.9677	30.0864	29.94	29.9677	30.196	29.9117	30.2308
ARCN1	Coatomer subunit delta	P48444;B0YIW6;E9PEU4	29.484	29.4781	29.6203	29.5342	29.532	29.4923		0.0501275	0.942327		0.0538341	0.839843		-0.127984	0.818184			0.960753		29.4532	29.4881	29.5109	29.4012	29.4668	29.5664	29.6948	29.6629	29.5033	29.4957	29.7502	29.6441	29.2467	29.5555	29.4512	29.5898	29.5315	29.4688	29.7047	29.1937	29.6022
ARF1	ADP-ribosylation factor 1	P84077;F5H3A6	31.8618	31.8674	31.745	31.9158	31.992	31.9721		0.0540137	0.950932		0.124605	0.845995		0.227094	0.765409			0.915279		31.6798	32.1604	31.7453	31.8157	31.9746	31.8119	31.8042	31.4629	31.9677	31.8719	32.13	31.8534	31.8081	32.2591	31.9435	31.901	31.8645	31.7453	32.1783	31.8042	32.1604
ARF3	ADP-ribosylation factor 3	P61204;F5H423;B7ZB63	24.6841	22.5738	23.3601	26.4026	26.9493	24.927		1.71843	0.817201		4.37553	0.0213667		1.56696	0.791876			0.250803		23.4711	27.3828	23.1985	22.7304	22.1152	22.8757	22.2136	24.6983	23.1683	24.8713	26.7645	27.3992	26.5754	27.141	26.632	27.0813	26.9428	23.132	27.1214	26.4815	22.9732
ARF4	ADP-ribosylation factor 4	P18085;C9JPM4;C9JAK5	28.8284	28.5178	28.392	28.4101	28.6638	28.5919		-0.4183	0.661954		0.146044	0.836299		0.199962	0.675636			0.440037		28.8324	28.8142	28.8385	28.5203	28.524	28.509	28.4629	28.2077	28.5052	28.258	28.604	28.258	28.5203	28.4938	28.4314	29.027	28.7031	28.6075	28.7864	28.4274	28.5463
ARF5	ADP-ribosylation factor 5	P84085;C9J1Z8	28.117	28.2977	28.0799	28.0551	28.1983	28.1761		-0.0618718	0.91995		-0.0992999	0.90223		0.0962485	0.854737			0.914415		28.3828	27.9705	27.9977	28.4823	28.1937	28.217	28.1312	28.258	27.8504	28.1015	28.189	27.9595	27.9705	27.9031	28.4746	28.4234	27.9923	28.1361	28.066	28.3325	28.17
ARF6	ADP-ribosylation factor 6	P62330	27.7379	27.7463	27.8368	27.7406	27.7857	27.906		0.00266647	0.997795		0.0393146	0.981801		0.069157	0.899047			0.961615		27.8623	27.7195	27.632	27.5536	27.6931	27.9923	27.6931	27.726	28.0914	27.7895	27.9146	27.4938	27.7645	28.019	27.7958	27.9869	27.341	27.7771	28.0137	27.8142	28.019
ARFGAP1	ADP-ribosylation factor GTPase-activating protein 1	Q8N6T3;F8W1U7;F8VWH9;E7EV62;Q8N6T3-2;E5RHT6;B7Z8H8;Q8N6T3-3;E5RHC5	24.9536	24.5217	23.9439	24.4453	24.1549	24.8078		-0.508311	0.836961		-0.366849	0.911733		0.863876	0.762752			0.91389		24.6865	24.7286	25.4457	24.5225	25.019	24.0236	22.5793	25.2133	24.0391	24.6811	24.7024	24.8623	23.5353	24.5522	24.6811	22.4059	24.9803	24.604	25.3031	25.0317	24.2923
ARFGAP2	ADP-ribosylation factor GTPase-activating protein 2	Q8N6H7;G5E9L0;E9PQP3;E9PIY6;B4DX29;B4E327;E9PMU9	27.2525	27.2447	27.2826	27.137	27.2259	27.3104		-0.115531	0.861211		-0.018791	0.988861		0.027799	0.958778			0.948475		27.3992	27.2077	27.1507	27.0608	27.1795	27.4938	27.189	27.2354	27.4234	27.217	27.3239	26.8858	27.1214	27.0914	27.1015	27.217	27.4938	27.17	27.1507	27.3745	27.5463
ARFGAP3	ADP-ribosylation factor GTPase-activating protein 3	Q9NP61;C9JZR4;E9PB03	24.1416	23.9739	24.0452	24.2576	24.4156	24.0782		0.116018	0.959269		0.441727	0.784244		0.0330448	0.968653			0.930296		23.9847	24.1795	24.2607	24.2535	24.3443	23.3239	24.0691	24.0359	24.0306	24.895	23.3125	24.3307	24.4923	24.5638	24.2535	24.6209	24.2244	24.2535	24.1095	24.4551	23.4948
ARFGEF1	Brefeldin A-inhibited guanine nucleotide-exchange protein 1	Q9Y6D6;E5RIF2	28.7441	28.7156	28.6838	28.7465	28.7084	28.6995		0.00241391	0.995103		-0.00720183	0.99205		0.0156786	0.958504			0.998808		28.7739	28.7453	28.7129	28.5682	28.6898	28.8887	28.5898	28.7195	28.7421	28.726	28.8264	28.6285	28.805	28.8858	28.5352	28.6865	28.726	28.7162	28.7292	28.5536	28.7989
ARFGEF2	Brefeldin A-inhibited guanine nucleotide-exchange protein 2	Q9Y6D5	25.4962	25.6568	25.3453	25.6899	25.4707	25.3364		0.193679	0.649445		-0.186142	0.810684		-0.00889508	0.990361			0.593923		25.604	25.4202	25.4645	25.632	25.4457	25.8927	25.3135	25.2058	25.5165	25.7103	25.673	25.6068	25.7695	25.6012	25.2463	25.4831	25.5522	25.4488	25.6811	25.2354	24.9803
ARFIP1	Arfaptin-1	P53367	26.6901	26.2896	26.5194	26.852	26.8198	26.9089		0.161884	0.820462		0.530203	0.564869		0.38953	0.664485			0.354935		26.518	26.9202	26.632	26.2151	26.1312	26.5225	26.189	26.9202	26.4488	26.8623	26.8623	26.7518	26.9316	26.7389	27.141	26.7129	26.6865	26.9869	27.0084	26.5898	27.0505
ARFRP1	ADP-ribosylation factor-related protein 1	Q13795;H0Y2L5;Q13795-2	23.3679	23.2099	23.1602	23.0647	23.4316	23.2774		-0.303227	0.941325		0.221752	0.950704		0.117191	0.954959			1		23.4923	22.7016	23.9098	23.9225	23.7077	21.9994	23.7492	22.5015	23.2299	24.0617	23.3022	21.2518	23.6431	22.7061	22.9757	24.0427	24.002	22.6338	23.8496	23.7895	22.8366
ARHGAP1	Rho GTPase-activating protein 1	Q07960;E9PCG8;H0YE29	31.3989	31.314	31.4665	31.4491	31.4627	31.4792		0.0501723	0.890819		0.148738	0.735416		0.012719	0.971915			0.850226		31.2814	31.4234	31.4919	31.2703	31.2135	31.4581	31.3724	31.6756	31.3515	31.4433	31.5618	31.3879	31.4032	31.525	31.4284	31.525	31.3724	31.4134	31.6022	31.4629	31.4384
ARHGAP10	Rho GTPase-activating protein 10	A1A4S6;H0Y8W5	27.3087	27.1921	27.2031	27.3509	27.4381	27.277		0.0421368	0.96667		0.246011	0.811974		0.0739129	0.85756			0.919325		27.019	27.6181	27.2891	27.2979	27.5014	26.7771	27.1214	27.2803	27.2077	27.4938	27.6181	27.1312	27.1604	27.5754	27.4154	27.3066	27.4551	27.4473	27.1115	27.217	27.3325
ARHGAP15	Rho GTPase-activating protein 15	Q53QZ3	24.0054	23.0165	23.3764	24.6545	24.0087	23.8737		0.649106	0.821276		0.992136	0.826106		0.497281	0.886926			0.815096		23.1092	24.275	24.632	21.5966	24.3376	23.1154	22.4873	24.0526	23.5892	24.9043	24.7338	24.7338	24.2463	22.8236	24.141	24.2607	24.8093	25.0401	22.3311	23.7229	24.4005
ARHGAP17	Rho GTPase-activating protein 17	Q68EM7-2;Q68EM7;Q68EM7-6;Q68EM7-5;Q68EM7-4;C9IZD3	26.7549	26.6463	26.5039	26.6917	26.6669	26.7289		-0.0632116	0.96095		0.0206593	0.987943		0.225049	0.777168			0.96175		26.4346	27.2262	26.604	26.4504	26.6865	26.8019	26.4846	26.7645	26.2625	26.7645	26.8385	26.6595	26.5045	26.604	26.3629	26.8504	26.8504	26.5609	26.5344	26.7389	27.0813
ARHGAP18	Rho GTPase-activating protein 18	Q8N392;Q8N392-2	31.2882	31.2494	31.2122	31.3371	31.234	31.2775		0.0489637	0.91003		-0.0154196	0.975481		0.0653326	0.771508			0.91266		31.2308	31.325	31.3088	31.1361	31.3088	31.3033	31.2535	31.1239	31.2591	31.2647	31.5014	31.3982	31.1842	31.2979	31.2759	31.2759	31.0864	31.2193	31.362	31.2979	31.2308
ARHGAP21	Rho GTPase-activating protein 21	Q5T5U3;E9PED6;E7ESW5;F8W9U9;Q5T5U3-3;F8W7V1	26.0308	25.7171	25.5876	25.8314	25.8753	25.6279		-0.199386	0.818276		0.158258	0.636136		0.0403504	0.966354			0.69062		25.7129	26.3187	26.0608	25.6676	25.6403	25.8433	25.2354	26.1234	25.4041	25.8576	25.8142	25.7338	25.9202	25.8409	25.9316	25.8904	25.8385	25.705	25.8044	25.4738	25.5285
ARHGAP25	Rho GTPase-activating protein 25	F5H3I2;G5E9G2;P42331-4;H7C4P1;E7EU69;E9PFQ7;P42331-3;P42331;C9JB56	25.3009	25.3797	25.4594	25.4321	25.3611	24.3423		0.131244	0.878491		-0.0185757	0.989427		-1.11714	0.774991			0.815154		25.2856	25.5812	25.0359	24.8764	25.4362	25.8264	25.6513	25.452	25.275	25.3273	25.4738	25.2926	25.6348	25.3101	25.3273	25.5463	25.2607	24.976	22.0354	24.7286	25.6292
ARHGAP35	Rho GTPase-activating protein 35	Q9NRY4-2;Q9NRY4;A2RRE5	24.0313	24.1791	23.9474	23.633	23.2756	24.0601		-0.398322	0.886522		-0.903553	0.668184		0.112699	0.937311			0.771209		24.2535	23.8385	24.002	24.1719	23.9584	24.4071	24.2535	23.7182	23.8704	22.3517	24.0443	24.2317	23.9043	23.7129	23.0329	23.8385	22.518	24.0359	23.9134	23.6423	24.6486
ARHGAP4	Rho GTPase-activating protein 4	P98171;P98171-2;F5GZW3;E7EQN5;E9PCM6	27.1886	27.1727	27.0867	27.2377	27.3589	27.2328		0.0490459	0.960732		0.18626	0.785851		0.146088	0.799067			0.915893		27.2262	27.1507	27.189	27.2077	27.1214	27.189	27.019	27.0711	27.17	27.524	27.4234	27.2262	26.7771	27.509	27.2445	27.5609	27.1214	27.1214	27.5609	27.0505	27.1984
ARHGAP6	Rho GTPase-activating protein 6	O43182-4;O43182;B4DN07;H7BYE6;O43182-5;O43182-2;B7Z8H7;O43182-3	30.6525	30.8381	30.7175	30.8449	30.7478	30.73		0.19244	0.778571		-0.0903722	0.843544		0.0124259	0.964932			0.768967		30.6629	30.7373	30.5573	30.7129	30.8756	30.9259	30.8534	30.6881	30.611	30.7533	30.9539	30.9677	30.7047	30.9188	30.7211	30.6798	30.6714	30.6714	30.8234	30.6798	30.7453
ARHGDIA	Rho GDP-dissociation inhibitor 1	P52565;A8MXW0	30.6858	31.0926	31.0484	30.788	30.7225	30.7058		0.102132	0.908701		-0.370089	0.711082		-0.342526	0.712214			0.740837		30.8829	30.5203	30.6544	30.9046	31.1483	31.225	31.2759	30.7453	31.1239	30.6372	30.5203	31.0544	30.94	30.4334	30.7849	31.0608	30.611	30.4629	30.7613	30.4629	31.1361
ARHGDIB	Rho GDP-dissociation inhibitor 2	P52566;F5H3P3;F5H6Q0;H0YGX7;F5H2R5	32.2531	32.3873	32.3004	32.3488	32.2314	32.3437		0.095727	0.872527		-0.155924	0.738475		0.0433029	0.955081			0.947382		32.375	32.2759	32.1084	32.2535	32.4359	32.4727	32.3436	32.0705	32.4871	32.4751	32.4007	32.3956	32.1239	32.2897	32.2077	32.3357	32.0927	32.225	32.5203	32.0609	32.5686
ARHGEF1	Rho guanine nucleotide exchange factor 1	Q92888;Q92888-3;Q92888-2;Q6NX52	26.5097	26.5659	26.5626	26.7138	26.7526	26.6397		0.204116	0.799158		0.186636	0.83707		0.0771022	0.945228			0.92208		26.3959	26.515	26.6181	26.5419	26.417	26.7389	26.7771	26.2244	26.6865	26.8142	26.8741	26.521	26.6458	26.976	26.8741	26.2979	26.8623	26.5463	26.4969	27.0296	26.4862
ARHGEF12	Rho guanine nucleotide exchange factor 12	Q9NZN5-2;Q9NZN5;E9PMR6	26.9921	26.8328	26.5919	26.9395	27.0049	26.8789		-0.0525956	0.895109		0.172135	0.810491		0.286955	0.693606			0.59225		27.0505	27.0401	26.8858	26.7129	27.0084	26.7771	26.5609	26.7771	26.4378	26.965	26.976	26.7771	27.0401	27.2625	26.8385	26.9428	26.976	26.7895	27.1115	26.5536	27.0608
ARHGEF2	Rho guanine nucleotide exchange factor 2	Q5VY93;Q92974-3;Q92974-2;Q92974;F5H3H5;B7Z977	27.7388	27.3954	27.5426	27.7231	27.6699	27.6712		-0.0156651	0.980282		0.274469	0.631365		0.128534	0.867328			0.693551		27.5609	27.7581	27.8973	27.3992	27.2262	27.5609	27.4785	27.726	27.4234	27.632	27.8203	27.8504	27.5898	27.7129	27.632	27.7958	27.5389	27.5165	28.0608	27.5536	27.5536
ARHGEF6	Rho guanine nucleotide exchange factor 6	F5H8B2;B7Z3C7;Q15052-2;Q15052	23.9624	24.0949	24.2638	24.4794	24.4107	24.4516		0.517	0.836024		0.315819	0.828164		0.187767	0.869905			0.90888		24.9316	23.6649	23.2908	24.48	23.5511	24.2535	23.9847	24.3578	24.4488	24.5739	24.3645	24.6486	24.3307	24.4298	24.2484	24.7182	24.2463	24.6209	24.0402	24.2317	24.9134
ARHGEF7	Rho guanine nucleotide exchange factor 7	B1ALK7;B7Z6G2;Q14155-1;Q14155-5;Q14155-6;Q14155-2;Q14155-3;Q14155;E7EUY6;H0YFH7;E9PDQ5	28.1689	27.9942	28.0601	28.2002	28.1967	28.3094		0.0312842	0.964009		0.202552	0.701703		0.249316	0.512184			0.634971		28.066	28.1604	28.2803	27.9595	27.9316	28.0914	27.8741	28.17	28.1361	28.267	28.4591	28.1263	27.9484	28.2935	28.0864	28.341	28.066	28.267	28.2399	28.3153	28.4154
ARL1	ADP-ribosylation factor-like protein 1	B4DWW1;P40616;F8VYN9;B4DZG7	27.0088	26.9737	25.968	26.7795	26.8163	27.0989		-0.229392	0.845371		-0.157359	0.89632		1.13092	0.695021			0.760337		27.2354	26.6998	27.0914	26.6458	26.9428	27.3325	27.1984	24.42	26.2856	26.4676	27.1214	26.7518	26.7771	26.3427	26.9539	27.217	26.7518	27.019	27.0711	26.8741	27.4314
ARL2	ADP-ribosylation factor-like protein 2	P36404;G3V184	25.0879	25.0642	25.0005	24.8683	24.8402	24.5963		-0.219558	0.876788		-0.224062	0.852273		-0.404204	0.832676			0.921964		25.0526	25.1095	25.1015	25.0608	24.7441	25.3877	24.9406	25.0894	24.9716	24.2961	25.1488	25.3101	24.7182	25.2058	24.4862	25.141	24.5276	24.5926	25.2058	25.0772	23.5096
ARL3	ADP-ribosylation factor-like protein 3	P36405	27.2904	27.0207	27.1141	27.0521	27.2656	27.2926		-0.238263	0.845159		0.24491	0.736317		0.178529	0.757034			0.836754		27.2445	27.4473	27.1795	26.9202	26.8973	27.2445	27.1115	27.0608	27.17	26.8264	27.5536	26.8858	26.9428	27.4394	27.2077	27.3239	27.0914	26.976	27.3828	27.2803	27.5315
ARL6IP5	PRA1 family protein 3	O75915	27.3759	27.7909	28.0877	26.7336	27.0998	27.1436		-0.642326	0.76036		-0.691122	0.322571		-0.944135	0.443923			0.0694333		27.4314	27.4073	27.2891	27.7129	27.6251	28.0349	27.8564	28.6424	27.7645	26.726	26.1965	26.6458	27.3662	27.0914	26.9539	27.2625	27.0914	27.0505	26.9316	27.5315	27.0608
ARL8B	ADP-ribosylation factor-like protein 8B	Q9NVJ2	27.623	27.9261	27.8307	27.6782	27.6269	27.7417		0.055258	0.965453		-0.299255	0.617982		-0.0889858	0.742142			0.852019		27.9316	27.5463	27.391	27.8324	27.8445	28.1015	27.7325	27.8973	27.8623	27.4073	27.8081	27.3662	28.1312	27.6798	27.5014	27.5682	27.7581	27.7325	27.6865	27.6798	27.8682
ARMC1	Armadillo repeat-containing protein 1	Q9NVT9;E5RJ86	24.6148	24.7589	24.4808	23.7693	24.2353	23.4565		-0.845456	0.845047		-0.523581	0.847263		-1.02437	0.604143			0.814277		24.2744	24.6703	24.8997	24.5926	24.7389	24.945	24.1924	24.6376	24.6126	22.8584	22.4561	24.7739	24.989	24.9372	22.9279	23.9272	25.1488	23.072	23.272	24.6595	22.8224
ARMC6	Armadillo repeat-containing protein 6	Q6NXE6-2;Q6NXE6;B4E1N1;F5GYG2	23.6552	24.538	24.6039	23.9343	24.1816	23.3897		0.279106	0.951098		-0.356398	0.869954		-1.2142	0.705489			0.883969		24.5812	24.2961	22.0882	24.4362	24.4234	24.7543	24.632	25.0233	24.1565	24.5344	23.7267	22.9415	24.5344	24.7441	23.0268	24.1609	24.7945	22.769	24.3394	24.5463	21.9043
ARMC8	Armadillo repeat-containing protein 8	A8MTG8;Q8IUR7-2;Q8IUR7;Q8IUR7-3;F5GWK4;B7Z637;B7Z441;H0YGM5;G5E9V6;Q8IUR7-6;G5E9V7	25.6702	25.936	25.7776	25.8788	26.0289	26.1453		0.208695	0.813848		0.0928399	0.90389		0.367652	0.531257			0.592007		25.3679	25.7338	25.9089	25.8504	26.0127	25.945	25.9225	25.9869	25.4234	25.9043	25.7619	25.9473	25.902	25.6153	26.2767	26.2002	26.0233	26.1234	26.1253	26.1661	26.1661
ARMT1	Protein-glutamate O-methyltransferase	Q9H993;F5GZY1	26.5454	26.8682	26.5436	26.6861	26.7475	26.7959		0.140703	0.888685		-0.120659	0.922641		0.252326	0.805283			0.926625		26.5754	26.8019	26.2589	26.7771	26.6865	27.141	26.5463	26.1194	26.965	26.8385	26.8973	26.6458	26.3629	27.0813	26.6458	27.0608	26.2021	26.4138	26.9089	26.9869	26.8741
ARPC1A	Actin-related protein 2/3 complex subunit 1A	E9PF58;Q92747;B4DLQ7	27.525	27.2673	27.3972	27.2436	27.4393	27.496		-0.281397	0.814322		0.172059	0.809758		0.0988655	0.947439			0.919833		27.5754	27.4314	27.5682	27.2714	27.3992	27.1312	27.4629	27.5682	27.1604	26.7895	27.3578	27.5826	27.2445	27.4234	27.6251	27.5389	27.17	27.1015	28.0505	27.1795	27.6527
ARPC1B	Actin-related protein 2/3 complex subunit 1B	O15143;F8WCG3	32.8509	33.1866	33.1639	33.151	33.1997	33.183		0.300162	0.579677		0.0130231	0.989908		0.0191186	0.966296			0.372451		32.8664	32.8497	32.8366	33.0266	33.2164	33.3169	33.2759	32.94	33.2759	33.043	33.1975	33.2336	33.13	33.2619	33.1649	33.3568	33.0151	33.0958	33.1223	33.2106	33.3033
ARPC2	Actin-related protein 2/3 complex subunit 2	O15144	32.8453	32.8946	32.9012	32.7733	32.8115	32.9286		-0.0720085	0.848032		-0.0830669	0.837803		0.0274235	0.957557			0.861864		32.8271	32.9435	32.7653	32.9099	32.7672	33.0067	32.8571	32.9241	32.9224	32.6608	32.8901	32.781	32.7613	32.8195	32.6501	32.8792	32.8974	32.7047	33.0721	33.0641	32.8737
ARPC3	Actin-related protein 2/3 complex subunit 3	O15145;B4DM63	31.7783	31.622	31.9045	31.8421	31.7865	31.724		0.0637813	0.922749		0.164493	0.838546		-0.180573	0.724196			0.884679		31.6415	31.94	31.7533	31.6501	31.6586	31.5573	31.8937	31.9117	31.9081	31.94	31.5799	31.8234	32.025	31.4284	31.8271	31.9539	31.9365	31.9259	31.5062	31.8973	31.5664
ARPC4	Actin-related protein 2/3 complex subunit 4	P59998;F8WCF6;C9JWM7;F8WDD7;E7ETI0;H7C0A3;F6TTL5	32.7078	32.2731	32.294	32.4586	32.5677	32.3984		-0.249194	0.611364		0.294588	0.754944		0.104432	0.897552			0.591836		32.8271	32.5956	32.7006	32.4605	32.08	32.2786	32.1331	32.622	32.1269	32.4556	32.4309	32.4751	32.4727	32.7129	32.8214	32.333	32.4032	32.4895	32.6264	32.1422	32.3357
ARPC5	Actin-related protein 2/3 complex subunit 5	O15511;B1ALC0;O15511-2	31.2452	31.2871	31.2564	31.2008	31.3827	31.311		-0.0444942	0.951551		0.0955876	0.839223		0.0546714	0.944308			0.921986		31.2193	31.3088	31.2077	31.3303	31.1177	31.4134	31.3515	31.1361	31.2814	30.9188	31.4284	31.2365	31.2193	31.4284	31.3196	31.5014	31.2814	31.0017	31.4083	31.2814	31.5527
ARPC5L	Actin-related protein 2/3 complex subunit 5-like protein	Q9BPX5	25.9939	25.7524	25.8455	25.1719	25.9313	25.7978		-0.821942	0.861201		0.178928	0.840507		-0.0477225	0.954638			0.916108		25.9225	25.9738	26.0854	25.8118	25.5551	25.8904	25.918	25.8166	25.8019	25.6153	26.2151	22.8384	26.019	26.317	25.7389	25.8166	25.8528	25.4984	25.9716	25.5551	26.1661
ARRB1	Beta-arrestin-1	P49407-2	30.6722	30.868	30.8172	30.9377	30.9817	30.9262		0.265507	0.772939		0.113686	0.871083		0.108999	0.863924			0.829988		30.7692	30.6629	30.5844	30.8004	30.6798	31.1239	30.8901	30.6285	30.933	31.0017	31.1361	30.8756	30.7373	31.2193	30.8682	31.0544	30.7849	30.8004	31.1115	30.7129	31.08
ARRB2	Beta-arrestin-2	P32121-2;P32121;P32121-3;H0Y688;Q68DZ5	24.0496	22.7521	23.7735	23.5322	24.0116	24.4487		-0.517398	0.850147		1.25948	0.553503		0.675187	0.71141			0.390735		23.9537	23.5911	24.604	22.9274	22.9404	22.3885	24.239	23.7742	23.3073	22.8829	23.388	24.5404	23.3175	23.2943	24.5285	24.4488	23.7747	24.4676	25.0526	23.5203	24.7543
ARRDC1	Arrestin domain-containing protein 1	Q5T370;Q8N5I2;F2Z3I4;Q5T371	23.2634	23.431	23.1968	23.1744	23.0771	22.9961		-0.0889943	0.975195		-0.353884	0.851991		-0.200648	0.941819			0.998585		22.3163	23.4676	24.0062	23.2328	22.8236	24.2365	22.5789	23.181	23.8304	23.5476	23.7534	22.6227	22.7738	23.4524	23.2168	22.4695	23.1695	23.4676	22.327	22.4002	23.7897
ASAH1	Acid ceramidase;Acid ceramidase subunit alpha;Acid ceramidase subunit beta	E7ERV9;E7EMM4;Q13510;Q13510-2;E9PDS0	25.0032	25.0425	23.5325	24.6459	24.2536	23.356		-0.357306	0.911434		-0.788855	0.809383		-0.176475	0.958825			0.628329		25.3578	24.976	24.6757	25.1642	24.9316	25.0317	22.8402	25.0443	22.713	25.217	23.2013	24.613	25.5522	25.5374	23.4085	23.4422	24.6264	23.6442	24.4832	22.5887	22.708
ASAP1	Arf-GAP with SH3 domain, ANK repeat and PH domain-containing protein 1	Q9ULH1;F8WBW0;Q9ULH1-2;H0YBF7	30.0814	30.1391	30.1023	30.058	30.149	30.1976		-0.0234437	0.952769		0.00993745	0.987001		0.0952972	0.819286			0.917832		30.0217	30.0864	30.1361	30.099	30.099	30.2193	30.1724	30.0608	30.0737	29.94	30.196	30.0479	30.0479	30.2759	29.9677	30.2535	30.099	30.0608	30.362	30.0479	30.3196
ASAP2	Arf-GAP with SH3 domain, ANK repeat and PH domain-containing protein 2	O43150	29.4883	29.5775	29.5987	29.6333	29.7371	29.8186		0.14504	0.817615		0.1596	0.816166		0.219896	0.709882			0.693664		29.5389	29.4668	29.4591	29.326	29.6612	29.7453	29.7502	29.3662	29.6798	29.391	29.7895	29.7276	29.6251	29.7692	29.8519	29.7502	29.5772	29.7911	29.9539	29.5754	29.9539
ASL	Argininosuccinate lyase	P04424;E7EMI0;E9PE48;F8W943	28.538	28.7431	28.7598	28.6512	28.6736	28.8087		0.113164	0.811978		-0.0695008	0.902967		0.0489108	0.854162			0.655786		28.5826	28.604	28.4274	28.7129	28.5052	29.0111	28.8324	28.6389	28.8081	28.5352	28.7927	28.6764	28.6004	28.7227	28.6389	28.7357	28.5969	28.7676	28.8741	28.7518	28.8415
ASMTL	N-acetylserotonin O-methyltransferase-like protein	O95671-2;O95671;E7ER97;F5GXH4	26.532	26.9582	26.9268	26.6717	26.7183	26.7232		0.139705	0.84759		-0.239931	0.810099		-0.203625	0.649834			0.628983		26.6998	26.4938	26.4024	27.0914	26.8973	26.8858	27.141	26.7771	26.8623	26.48	26.8504	26.53	26.8264	26.8858	26.5165	27.0505	26.4202	26.673	26.6998	26.6458	26.8741
ASNA1	ATPase ASNA1	O43681	28.518	28.5345	28.3798	28.3481	28.4718	28.3975		-0.169823	0.825352		-0.0627085	0.903802		0.0176956	0.964434			0.88575		28.3282	28.5426	28.6831	28.6181	28.2891	28.6964	28.3452	28.391	28.4032	28.2077	28.3787	28.3828	28.4234	28.5014	28.3282	28.5754	28.4823	28.3109	28.4512	28.189	28.6389
ASPSCR1	Tether containing UBX domain for GLUT4	Q9BZE9;Q9BZE9-2;Q9BZE9-3;C9JAL9;Q9BZE9-4	24.3588	23.8262	24.3373	24.5558	24.677	24.6276		0.197023	0.811064		0.850743	0.787034		0.2903	0.799665			0.815638		24.3645	24.2821	24.4298	24.4234	22.563	24.4923	24.8904	24.0772	24.0443	24.3511	24.4923	24.8336	24.5463	24.8044	25.0975	24.1411	24.6649	24.2607	24.9406	24.7338	24.5754
ASRGL1	Isoaspartyl peptidase/L-asparaginase;Isoaspartyl peptidase/L-asparaginase alpha chain;Isoaspartyl peptidase/L-asparaginase beta chain	Q7L266;Q7L266-2	23.9405	24.1125	23.9887	24.1185	24.1704	24.3908		0.177969	0.863408		0.0579144	0.964324		0.402172	0.506065			0.75216		23.7895	24.1095	23.9225	24.2244	24.0772	24.0359	23.8191	24.2244	23.9225	24.558	24.0526	24.0443	23.8191	24.654	24.0935	23.9495	23.9847	24.4298	24.217	24.5926	24.3239
ATE1	Arginyl-tRNA--protein transferase 1	O95260-2;F5GXE4;B4E107	27.9932	28.2377	28.2445	27.966	27.9986	28.2841		-0.0272093	0.961531		-0.239185	0.799371		0.0395815	0.956013			0.599013		27.8973	28.1507	27.9316	28.0084	28.1115	28.5934	28.249	28.0137	28.4707	27.8142	27.965	28.0137	28.0711	28.0296	27.9146	28.1937	27.8564	28.1604	28.4512	28.1214	28.4032
ATG16L1	Autophagy-related protein 16-1	E7EVC7;Q676U5-2;Q676U5;Q676U5-3;E7EVS5;Q676U5-5;Q676U5-4	23.4496	23.5935	22.924	23.6806	23.8917	23.414		0.230966	0.935384		0.298202	0.835314		0.489954	0.71156			0.834819		22.3523	24.1015	23.895	23.5165	23.4551	23.8089	23.3376	23.2491	22.1854	23.7594	22.9139	23.7492	24.2999	23.3536	23.5522	24.4516	24.2096	23.3101	23.1877	23.4923	23.6659
ATG3	Ubiquitin-like-conjugating enzyme ATG3	Q9NT62;Q9NT62-2	27.1916	27.2466	26.9073	27.0488	27.1098	27.0879		-0.142828	0.835265		-0.1368	0.828741		0.180601	0.703645			0.679236		27.141	27.2077	27.2262	27.1795	27.2625	27.2979	26.8385	26.8858	26.9977	27.0296	27.2803	27.0711	26.8142	27.1795	27.1115	27.2979	26.8504	27.0813	27.2714	26.8385	27.1604
ATG4B	Cysteine protease ATG4B	Q9Y4P1-6;Q9Y4P1;Q9Y4P1-2;C9JIK8;H7C2A6;F8WD71;F5H7P2;Q9Y4P1-4	24.8354	25.1098	25.2663	24.8857	24.9678	24.9445		0.0503286	0.963567		-0.141964	0.915463		-0.321836	0.712065			0.912558		24.7129	25.1015	24.6918	25.1642	24.9225	25.2426	25.4707	25.0148	25.3135	24.8764	25.2317	24.9672	24.4676	25.604	25.0691	24.6757	24.5225	24.7077	25.1488	24.6431	25.2785
ATG5	Autophagy protein 5	Q9H1Y0;Q9H1Y0-2	25.7022	25.4654	25.822	25.6567	25.9373	25.7187		-0.0455074	0.957394		0.471915	0.813317		-0.103288	0.798187			0.888299		25.6595	25.8433	25.604	25.4234	25.0526	25.9202	25.8528	25.8312	25.7821	25.6486	26.0464	25.4769	25.4551	25.4676	25.7594	26.6181	25.9043	25.6012	25.7846	25.9225	25.5667
ATG7	Ubiquitin-like modifier-activating enzyme ATG7	O95352;E9PB95;O95352-2	26.6277	26.7571	26.5387	27.0906	27.1532	27.0133		0.462916	0.812217		0.396177	0.778443		0.474648	0.527685			0.644121		26.6181	26.9428	26.3222	26.3662	26.5725	27.3325	26.632	26.521	26.4629	27.3662	27.2535	27.2891	26.4536	27.2354	27.1507	27.3066	26.9202	26.7771	27.4629	26.8264	26.9869
ATG9A	Autophagy-related protein 9A	Q7Z3C6-2;Q7Z3C6;H7C1G6;H7C152	23.8195	23.8323	23.5622	24.0135	23.8932	24.4588		0.194006	0.898515		0.0609167	0.989352		0.896642	0.602171			0.864165		23.7895	24.0935	23.5754	24.4551	24.1565	22.8852	24.1174	23.9672	22.6019	23.7182	24.0443	23.632	24.6595	24.1253	24.0608	22.989	24.3975	24.3975	24.2463	24.8336	24.3578
ATIC	Bifunctional purine biosynthesis protein PURH;Phosphoribosylaminoimidazolecarboxamide formyltransferase;IMP cyclohydrolase	E9PBU3;P31939;F5GWY2	30.5974	30.5753	30.6105	30.6802	30.6563	30.7417		0.0828072	0.818954		0.0810242	0.878894		0.131201	0.790398			0.915685		30.611	30.6798	30.5014	30.5844	30.5481	30.5934	30.5664	30.6629	30.6022	30.6798	30.7849	30.6629	30.5934	30.8081	30.611	30.8234	30.3828	30.4629	30.8459	30.7533	30.9046
ATL3	Atlastin-3	F5H6I7;Q6DD88;C9JUU1	26.4561	26.3771	26.9035	25.6687	25.9669	25.9081		-0.787359	0.79658		-0.410182	0.586045		-0.995327	0.3102			0.185199		26.0732	26.518	26.7771	26.1194	26.518	26.4938	26.8623	26.8504	26.9977	25.7746	25.0567	25.4234	26.4202	26.0338	26.0062	26.0505	25.7771	26.1908	25.6568	26.2299	25.5551
ATOX1	Copper transport protein ATOX1	E5RGN3;E5RIM7;O00244	26.2902	26.363	26.4621	26.2659	25.455	26.0441		-0.0242747	0.977517		-0.908003	0.837101		-0.417996	0.78658			0.914388		26.4831	26.067	26.3205	26.228	26.2571	26.604	26.3325	26.341	26.7129	26.2372	26.0772	26.1738	26.5754	26.2317	26.1095	26.4984	22.9806	25.2607	26.5448	25.9111	26.4598
ATP1A1	Sodium/potassium-transporting ATPase subunit alpha-1	B7Z3U6;P05023;F5H3A1;H7BXX5;P05023-2	24.1877	23.6582	24.5319	23.9487	24.1979	23.9756		-0.238982	0.95371		0.539707	0.842634		-0.556353	0.709709			0.935014		24.6096	24.5165	23.437	24.1488	22.4546	24.3712	24.4984	24.7129	24.3844	22.3848	24.3721	24.0275	25.0105	24.2891	24.3307	24.1871	23.9847	24.2821	23.0493	24.141	24.4298
ATP2A2	Sarcoplasmic/endoplasmic reticulum calcium ATPase 2	P16615;P16615-5;P16615-2;P16615-3;P16615-4;H7C5W9	27.4387	27.9617	28.2617	26.1118	27.0412	27.3899		-1.32691	0.803224		-0.920447	0.292733		-0.871755	0.428597			0.160253		27.3239	27.5609	27.4314	27.7645	28.1556	27.965	27.8445	28.4354	28.5052	26.1927	25.2244	25.2785	27.7518	26.7389	26.9428	27.1507	27.3325	27.524	26.9539	27.4707	27.611
ATP2A3	Sarcoplasmic/endoplasmic reticulum calcium ATPase 3	Q93084-4;Q93084-2;Q93084-3;Q93084-7;Q93084;Q93084-6;Q93084-5	30.0313	30.422	30.7437	29.2514	29.5962	29.9104		-0.77984	0.810956		-0.825846	0.350068		-0.833306	0.310455			0.189066		30.1724	29.9814	29.94	30.2077	30.362	30.6964	30.4727	30.8756	30.8829	29.3683	28.3536	28.9428	30.341	29.5109	29.3515	29.6251	29.8973	29.805	29.7276	30.2422	29.8667
ATP2C1	Calcium-transporting ATPase type 2C member 1	H0Y2Q7;P98194-2;P98194-4;P98194;P98194-3;P98194-5;P98194-6;G3XAH8;E7ERC6;H0Y9V7;G8JLN9;H0Y8X9;H0Y9S7	26.6918	26.7231	26.8012	26.4955	26.2163	26.1186		-0.196334	0.867224		-0.506773	0.712203		-0.682664	0.398426			0.395697		26.509	26.7645	26.8019	26.8385	26.9316	26.3992	26.7389	26.6998	26.965	26.5225	25.9825	26.7771	26.6998	25.976	26.5195	25.8457	26.524	26.4234	25.7208	26.143	26.1871
ATP5A1	ATP synthase subunit alpha, mitochondrial	P25705;A8K092	30.792	31.2253	31.4561	31.3961	31.5053	31.3035		0.604117	0.688668		0.280001	0.810548		-0.15252	0.602423			0.232761		30.8973	30.6629	30.8157	31.3828	31.0283	31.2647	31.362	31.5481	31.4581	31.3142	31.341	31.1483	31.781	31.9081	31.4334	31.5618	31.1177	31.2647	31.2365	31.2647	31.4483
ATP5B	ATP synthase subunit beta, mitochondrial;ATP synthase subunit beta	P06576;F8VPV9;H0YH81;F8W079	31.1225	31.4555	31.7464	31.5786	31.7396	31.6114		0.456103	0.743936		0.284067	0.809702		-0.13495	0.852548			0.470208		31.1783	30.947	31.2422	31.6372	31.3672	31.362	31.6586	31.9916	31.5889	31.4678	31.5014	31.3982	31.947	32.1574	31.7453	31.7252	31.3303	31.5343	31.7373	31.3357	31.8385
ATP5C1	ATP synthase subunit gamma;ATP synthase subunit gamma, mitochondrial	B4DL14;P36542-2;P36542	27.185	27.7432	28.1381	27.8892	28.1865	27.8082		0.704271	0.700014		0.443234	0.758859		-0.329918	0.669759			0.224395		27.141	27.2535	27.1604	28.0349	27.3745	27.8203	27.9484	28.1164	28.3494	27.8799	27.4862	27.8973	28.2935	28.5389	28.1984	28.2891	27.7195	28.2077	27.5536	27.726	27.7453
ATP5D	ATP synthase subunit delta, mitochondrial	P30049	26.1834	26.6117	26.6896	24.3874	25.932	26.754		-1.79607	0.849616		-0.67972	0.895729		0.0643733	0.958859			0.840835		26.3307	25.7645	26.4551	27.0505	26.4488	26.3359	26.976	26.8741	26.2188	26.632	21.4606	22.159	27.2979	27.1604	22.8767	26.726	26.965	27.2625	26.673	26.8019	26.2785
ATP5J	ATP synthase-coupling factor 6, mitochondrial	A8MUH2;P18859	24.9168	25.7117	25.8219	25.7078	26.2133	25.9017		0.79103	0.818633		0.501606	0.709263		0.0798802	0.948168			0.599052		25.767	23.5345	25.4488	25.8504	25.3066	25.9781	26.1095	25.5841	25.772	25.7945	25.5165	25.4738	26.0464	26.632	26.0894	26.1214	26.0105	25.7771	25.6153	25.8788	26.3359
ATP5O	ATP synthase subunit O, mitochondrial	P48047	29.0383	29.3048	29.5138	29.5602	29.729	29.662		0.521886	0.796189		0.424195	0.7333		0.148228	0.805219			0.542946		29.2399	28.9923	28.8829	29.6268	29.1937	29.094	29.4354	29.7357	29.3704	29.2193	29.391	29.4823	30.1483	30.1239	29.8218	29.4314	29.5389	29.7645	29.6629	29.3869	29.8339
ATP5S	ATP synthase subunit s, mitochondrial	Q99766;Q8WXQ4	23.5321	23.4739	23.4683	23.6901	24.0094	23.829		0.157965	0.970345		0.535482	0.846202		0.360758	0.895419			0.994304		24.0443	24.3645	22.1876	24.4425	23.7987	22.1806	23.7759	23.7964	22.8325	23.8858	24.1015	22.2268	24.5463	24.3778	24.019	24.2244	23.4164	24.604	24.1015	22.3789	24.2317
ATP6AP2	Renin receptor	B7Z9I3;O75787;H0Y750;B7Z1I9;H7C240;H7C3E1;B7Z413	23.6575	23.7251	24.0472	23.156	23.0596	23.1504		-0.501479	0.910985		-0.665553	0.748462		-0.896837	0.528685			0.891516		21.9227	24.4234	24.6264	23.9495	23.3778	23.8481	23.6649	24.2821	24.1946	23.4223	23.3967	23.9134	21.8917	22.1784	23.2337	23.5134	23.3127	22.8472	23.8444	23.2787	22.6311
ATP6V0A2	V-type proton ATPase 116 kDa subunit a isoform 2;V-type proton ATPase subunit a	Q9Y487;Q8TBM3;F5H5F3	24.7049	23.5084	23.9727	23.7018	23.9872	23.5769		-1.00315	0.815778		0.478794	0.839126		-0.395753	0.896695			0.909543		24.7594	24.7234	24.632	23.0753	24.1642	23.2856	24.1488	24.9716	22.7976	24.7492	21.9488	23.7182	24.391	24.6486	24.1332	24.2891	22.8778	23.2384	24.239	22.6281	24.2021
ATP6V0D1	V-type proton ATPase subunit d 1	F5GYQ1;P61421;F8WEN9	27.3279	26.9783	27.3769	27.2548	27.1692	27.2475		-0.0731451	0.958187		0.190836	0.847328		-0.129399	0.669845			0.863293		27.1984	27.0084	27.7771	27.141	26.5225	27.2714	27.4073	27.391	27.3325	27.4394	27.019	27.1214	27.4394	27.2354	27.3828	27.0608	26.9977	27.2354	27.341	27.0813	27.3325
ATP6V1A	V-type proton ATPase catalytic subunit A	B7Z1R5;P38606;B7Z2V6	31.0498	30.9953	31.0358	31.049	31.1823	31.0725		-0.000811418	0.996284		0.187034	0.825166		0.0366427	0.948857			0.914117		31.0737	31.0673	31.0084	31.0608	30.8901	31.0349	31.1115	31.0283	30.9677	31.0283	31.1177	31.0349	31.015	31.4234	30.94	31.3776	30.9882	30.8901	31.099	31.0084	31.2924
ATP6V1B2	V-type proton ATPase subunit B, brain isoform	P21281;B4DFM5	28.6695	28.6522	28.6821	28.806	28.7297	28.8156		0.136451	0.819517		0.0774988	0.840863		0.133532	0.70994			0.792858		28.5898	28.6831	28.7357	28.7357	28.6931	28.5278	28.6527	28.7581	28.6355	28.9977	28.7453	28.726	28.7549	28.7162	28.6389	28.8973	28.6663	28.6424	28.9202	28.7739	28.9259
ATP6V1C1	V-type proton ATPase subunit C 1	P21283;E7EV59	27.6502	27.6104	27.6462	27.6096	27.5884	27.5855		-0.0405347	0.919449		-0.0219445	0.985765		-0.0606643	0.895172			0.999303		27.5389	27.6663	27.7453	27.7958	27.4314	27.604	27.4862	27.8916	27.5609	27.4707	27.5969	27.632	27.7389	27.9814	27.6663	27.2354	27.4707	27.6458	27.604	27.5315	27.5609
ATP6V1D	V-type proton ATPase subunit D	G3V2S6;Q9Y5K8;G3V2V6;H0YJH8	24.4945	25.5903	25.9739	24.6546	25.1173	24.9661		0.160127	0.976794		-0.472932	0.883648		-1.0078	0.830027			0.922092		22.4279	25.2785	25.7771	26.3325	25.317	25.1214	25.9111	25.3511	26.6595	23.36	25.5783	25.4892	24.1909	23.5081	25.1253	25.632	26.204	25.8552	25.6944	26.1055	22.2093
ATP6V1E1	V-type proton ATPase subunit E 1	P36543;P36543-2;A8MUN4;C9J8H1	28.1015	27.9727	28.0547	27.9964	28.0732	27.9603		-0.10518	0.915431		0.100431	0.886235		-0.0944028	0.913915			0.999035		27.8564	28.4668	27.9814	27.9316	27.7064	28.2803	27.9031	28.3869	27.8741	28.1065	28.2445	27.8142	27.8203	28.2445	28.066	28.0965	27.8858	27.8504	28.0711	27.6527	28.267
ATP6V1F	V-type proton ATPase subunit F	Q16864;C9J2K4	23.6486	23.8986	22.9883	23.369	23.8624	23.1894		-0.279552	0.947762		-0.0361395	0.987098		0.201117	0.950989			0.913699		24.5812	22.8481	23.5165	23.9406	23.5613	24.1938	23.7389	22.3655	22.8604	24.2448	24.3821	22.5527	22.2966	23.456	23.6757	24.2821	24.0359	22.1713	23.654	24.3443	22.5878
ATP6V1G1	V-type proton ATPase subunit G 1	O75348	27.351	27.1171	27.1491	27.6472	27.232	27.1153		0.29619	0.848648		0.114922	0.924215		-0.0337648	0.977231			0.8264		27.4473	27.4551	27.1507	27.1507	27.2803	26.9202	26.8973	27.3992	27.1507	28.1842	27.726	27.2714	27.4073	27.8385	27.1604	26.9316	26.9977	27.3239	27.217	26.4266	27.4938
ATP6V1H	V-type proton ATPase subunit H	Q9UI12-2;Q9UI12;G3V126	26.787	26.6366	26.7349	26.6204	26.6496	26.8074		-0.166602	0.83843		0.0130448	0.987915		0.0725234	0.876812			0.892125		26.8623	26.9089	26.5898	26.6458	26.6458	26.6181	26.8019	26.9089	26.4938	26.7771	26.3595	26.7129	26.632	26.8973	26.3562	26.632	26.7129	26.7389	26.8019	26.8623	26.8264
ATP8A1	Phospholipid-transporting ATPase IA	Q9Y2Q0-3;Q9Y2Q0-2;Q9Y2Q0	27.2177	27.1489	27.3198	27.0496	27.0502	26.9548		-0.1681	0.926853		-0.0986404	0.869224		-0.364978	0.526977			0.925052		27.3153	27.0401	27.2979	26.976	27.2354	27.2354	27.1312	27.611	27.217	26.673	26.8019	26.726	27.9977	27.2714	26.8264	26.9428	27.1604	27.0914	26.9316	26.7771	27.019
ATPAF1	ATP synthase mitochondrial F1 complex assembly factor 1	I3L448;Q5TC12;H0YD21;I3L1W9;A8MRA7;B7Z7D6;B7Z7I6;H0YEW4	24.0105	24.0425	24.1982	23.7746	24.4682	23.997		-0.23588	0.971076		0.425775	0.883176		-0.201233	0.956911			0.998881		24.5105	22.0595	25.4614	24.8811	23.1955	24.0508	23.0239	24.0099	25.5609	25.1488	24.8433	23.0082	22.0981	24.9847	23.1409	24.5869	25.1604	24.9495	24.7645	23.0028	23.2713
ATXN10	Ataxin-10	Q9UBB4;E7ESH8;Q9UBB4-2	25.0383	25.0919	25.0784	25.4612	25.293	25.1276		0.422871	0.830888		0.201181	0.838803		0.0492218	0.930263			0.791968		25.1833	24.9043	25.0275	25.1908	24.6486	25.4362	25.0233	24.9584	25.2535	26.0526	25.1449	25.3477	25.2996	25.3778	25.1946	25.4394	25.1604	25.1449	25.1135	24.9316	25.3205
ATXN2L	Ataxin-2-like protein	Q8WWM7;Q8WWM7-6;Q8WWM7-5;Q8WWM7-4;A8K1R6;Q8WWM7-2;Q63ZY4;H3BUF6	23.4718	22.979	23.5397	23.6786	23.4977	23.6957		0.20679	0.870829		0.518726	0.751996		0.155954	0.792743			0.591245		23.582	23.4556	23.3778	22.4231	23.5983	22.9157	23.4923	23.5285	23.5983	23.4551	24.141	23.8764	23.2418	23.5285	23.6649	23.4198	23.3778	23.5522	23.4425	23.8385	23.9495
B2M	Beta-2-microglobulin;Beta-2-microglobulin form pI 5.3	F5H6I0;P61769;H0YLF3	29.9454	30.2646	30.3625	29.8411	29.9156	29.8968		-0.104342	0.916688		-0.348935	0.757017		-0.465705	0.301563			0.481707		29.995	30.0737	29.7676	30.341	29.8593	30.5934	30.4433	30.4134	30.2308	29.4194	29.7895	29.995	30.1604	29.9539	29.7113	30.1115	29.8858	29.7973	30.1115	29.8294	29.8489
BABAM1	BRISC and BRCA1-A complex member 1	Q9NWV8;H9KV33;Q9NWV8-3;Q9NWV8-2	24.1878	24.8322	23.889	24.6123	25.0151	24.4151		0.424468	0.897897		0.182899	0.968177		0.526068	0.869657			0.914923		25.0894	22.8092	24.6649	25.8504	25.5014	23.1449	23.7895	23.48	24.3975	24.7543	23.867	24.8433	24.9847	24.9539	24.989	25.0608	25.0567	24.6811	25.2571	24.9933	22.7289
BAD	Bcl2-associated agonist of cell death	Q92934;F5GY71	23.4932	24.213	23.3468	23.5838	23.7956	23.8328		0.0905492	0.976137		-0.417413	0.848192		0.48598	0.833264			0.922038		24.2021	23.0814	23.1962	24.0275	24.4862	24.1253	22.6779	23.2691	24.0935	24.082	24.0719	23.7358	22.4454	23.0272	24.0526	23.2737	24.8288	23.6192	24.1253	24.6486	22.9381
BAG2	BAG family molecular chaperone regulator 2	O95816;B4DXE2	24.858	24.8779	25.0273	24.7367	24.7643	24.8478		-0.121314	0.95132		-0.113595	0.973582		-0.179478	0.902787			1		24.7796	24.9803	24.8142	24.9672	24.7441	24.9225	25.2891	24.9495	24.8433	24.9134	23.8716	25.1135	25.0484	23.5216	25.4707	25.217	24.8481	24.9977	24.025	25.2354	25.1332
BAG5	BAG family molecular chaperone regulator 5	Q9UL15;Q9UL15-2	28.8495	28.5594	28.6334	28.6042	28.6526	28.7051		-0.245328	0.84436		0.0931923	0.955708		0.0716826	0.954662			0.988733		28.4314	28.8887	29.2285	28.3494	28.5898	28.7389	28.5315	29.1288	28.2399	28.4354	28.877	28.6492	28.4551	29.2216	28.4512	28.8112	28.1263	28.391	28.9677	28.4938	28.9677
BAG6	Large proline-rich protein BAG6	B0UX83;G3V1Z5;P46379-2;P46379;P46379-3;F8VX53;F8VXY4;E7EMZ4	28.2547	28.0453	28.1787	28.0961	28.2037	28.0185		-0.158556	0.806198		0.158435	0.856196		-0.160259	0.504492			0.852047		28.2714	28.2123	28.2803	27.9923	27.9977	28.1459	28.1937	28.2714	28.0711	28.1604	28.1214	27.8858	28.217	28.0349	27.8623	28.6285	28.2891	27.9869	28.0762	28.0349	27.976
BANF1	Barrier-to-autointegration factor;Barrier-to-autointegration factor, N-terminally processed	O75531	26.6772	26.9594	27.0679	26.9493	26.971	26.8153		0.272121	0.744523		0.0116889	0.98969		-0.252519	0.649812			0.64396		26.8264	26.6458	26.5595	26.8623	26.7895	27.2262	27.0813	26.9428	27.1795	27.0914	26.8973	26.7895	27.019	27.141	26.8973	27.0813	26.7645	27.0084	26.5285	26.8741	26.8504
BANK1	B-cell scaffold protein with ankyrin repeats	Q8NDB2-3;Q8NDB2-2;Q8NDB2;Q8NDB2-4	26.81	26.4618	26.5337	26.5792	26.3939	26.3317		-0.230832	0.816688		-0.0678709	0.944407		-0.201971	0.785518			0.689724		26.673	26.8142	26.9428	26.4969	26.2426	26.6458	26.5014	26.632	26.4676	26.9539	26.3528	26.53	26.48	26.6458	26.3118	26.0732	26.5448	26.5014	26.1585	26.0211	26.6458
BAX	Apoptosis regulator BAX	Q07812-5;Q07812-8;Q07812;Q07812-2;Q07812-7	26.2181	26.3628	26.2842	26.392	26.3481	26.3906		0.173882	0.847217		-0.014753	0.990615		0.106486	0.896686			0.983148		26.0359	26.1965	26.4218	26.5898	26.4441	26.0547	26.4378	25.8997	26.515	26.5135	26.6595	26.2714	26.1234	26.4266	26.2408	26.5898	26.1352	26.3662	26.1681	26.4953	26.533
BCAP31	B-cell receptor-associated protein 31	P51572;P51572-2;C9JSP1;C9JQ75;C9J0M4	27.3334	27.8123	28.2546	26.8471	27.2389	27.3915		-0.486326	0.844217		-0.573319	0.519031		-0.863106	0.374664			0.215276		27.4234	27.3325	27.2445	27.9428	27.6798	27.8142	28.1263	28.2714	28.3662	26.9977	26.002	26.6181	27.7708	27.4629	27.3066	26.8623	27.3239	27.5389	27.1015	27.8445	27.0813
BCAT1	Branched-chain-amino-acid aminotransferase, cytosolic	P54687-4;P54687;F5H5E4;P54687-2;P54687-3	24.0386	23.4403	23.4781	23.9643	24.3064	22.9961		-0.0743324	0.985763		0.866055	0.829441		-0.482016	0.893424			0.912845		24.8433	24.2021	23.0706	24.5105	23.1254	22.6851	23.3033	24.4362	22.6947	22.2508	23.6594	25.2133	24.7338	24.4692	25.0894	24.7923	22.8747	22.5633	23.9138	21.4776	24.0296
BCL2L1	Bcl-2-like protein 1	Q5QP56;Q9H1R6;Q5TE64;Q07817-2;Q07817-3;Q07817	26.4713	26.4684	26.5015	26.3027	26.4109	26.5065		-0.168623	0.87633		-0.0574619	0.947288		0.00501315	0.989275			0.930878		26.604	26.2785	26.5315	26.3894	26.452	26.5638	26.4598	26.4692	26.5754	26.1546	26.574	25.9316	26.5507	26.7129	26.533	26.1661	26.2317	26.2961	26.604	26.6458	26.48
BCR	Breakpoint cluster region protein	P11274;P11274-2;H0Y2V4	25.5194	25.6398	25.4819	25.5847	25.7014	25.7495		0.0653092	0.944677		0.0615923	0.959977		0.267578	0.717526			0.921679		25.6181	25.1833	25.7569	25.6125	25.6153	25.6918	25.726	25.5983	25.1214	25.3578	25.5404	25.6838	25.7569	26.2188	25.4984	25.5841	25.5045	25.9316	25.5983	25.5869	25.8811
BICD2	Protein bicaudal D homolog 2	Q8TD16;Q8TD16-2	27.4393	27.0341	27.1989	27.2066	27.1877	27.0852		-0.232701	0.829968		0.153541	0.665147		-0.113671	0.88215			0.761296		27.2625	27.632	27.4234	26.9977	27.1507	26.9539	27.141	27.4473	27.0084	27.4551	27.4234	26.8973	27.0505	27.2354	27.217	27.217	27.0813	27.3578	27.141	27.0401	26.8019
BID	BH3-interacting domain death agonist;BH3-interacting domain death agonist p15;BH3-interacting domain death agonist p13;BH3-interacting domain death agonist p11	P55957;P55957-2;P55957-4	30.1512	30.3156	30.0116	30.2394	30.1807	30.274		0.088278	0.894596		-0.134994	0.84246		0.262372	0.695814			0.851985		30.4234	30.0217	30.0084	30.1724	30.1724	30.6022	30.0864	29.94	30.0084	30.2193	30.2422	30.1239	30.3724	30.2535	30.0084	30.196	30.2647	30.4334	30.1604	29.9539	30.5481
BIN2	Bridging integrator 2	Q9UBW5;F5H0W4;Q9UBW5-2	32.7788	33.0106	32.9374	32.8006	32.8069	32.9144		0.0217994	0.8602		-0.203691	0.758825		-0.0229937	0.964613			0.804753		32.7633	32.7593	32.8138	32.8403	32.9983	33.1931	33.0414	32.859	32.9117	32.7907	32.7593	32.829	32.8233	32.8719	32.7191	32.9865	32.6501	32.7191	33.2062	32.7473	32.9848
BIRC6	Baculoviral IAP repeat-containing protein 6	Q9NR09	25.3385	24.24	24.1685	24.3516	24.9721	24.3006		-0.986846	0.823885		0.732168	0.845806		0.132098	0.965415			0.916063		25.217	25.3031	25.4953	22.9714	24.7945	24.9539	22.4263	25.2996	24.7796	25.1642	23.8295	25.217	23.1959	23.5153	25.3101	24.895	26.1681	24.9672	23.3658	23.7922	25.0772
BLMH	Bleomycin hydrolase	Q13867;E7EMN3	29.4214	29.3957	29.519	29.467	29.5298	29.5356		0.0456692	0.923092		0.134127	0.645849		0.0165488	0.964056			0.892209		29.4194	29.2602	29.5844	29.4053	29.3346	29.4473	29.5573	29.3557	29.6441	29.3578	29.4804	29.6004	29.4294	29.5463	29.5555	29.6022	29.4154	29.6004	29.6764	29.389	29.4765
BLOC1S1	Biogenesis of lysosome-related organelles complex 1 subunit 1	G8JLQ3;P78537-2;P78537	24.8305	24.0301	24.643	24.415	24.4993	23.9206		-0.415439	0.890979		0.469265	0.879399		-0.722407	0.83398			0.939068		24.9134	24.8288	24.7492	25.0567	22.3524	24.6811	24.7995	24.0162	25.1135	23.0112	25.0608	24.9672	24.6209	24.7746	24.0388	24.6918	24.4923	24.9672	24.7995	22.0991	23.8168
BLOC1S4	Biogenesis of lysosome-related organelles complex 1 subunit 4	Q9NUP1	24.5422	23.3296	24.6464	24.7967	24.2806	24.7132		0.254483	0.83537		0.951017	0.644535		0.0667464	0.949367			0.0943566		24.7796	24.2891	24.558	23.7969	23.1796	23.0124	24.2678	24.867	24.8044	24.5285	25.1055	24.5638	24.989	24.1253	23.6545	24.9584	24.3844	24.4298	24.824	24.8044	24.7945
BLVRA	Biliverdin reductase A	P53004	29.5135	29.564	29.4527	29.5781	29.5414	29.6105		0.0645165	0.849288		-0.0226078	0.96849		0.157837	0.792778			0.926956		29.5969	29.4234	29.5203	29.4765	29.4862	29.7292	29.5536	29.4571	29.3473	29.6578	29.6163	29.5481	29.49	29.5682	29.4093	29.6216	29.5664	29.2869	29.6881	29.6285	29.8385
BLVRB	Flavin reductase (NADPH)	P30043	25.3245	25.7669	25.8365	26.0773	25.9886	25.7485		0.752793	0.734281		0.221676	0.920314		-0.088064	0.953694			0.860697		24.867	25.7024	25.4041	25.0567	26.5682	25.6757	25.7695	25.5492	26.1908	25.9539	26.2225	26.3861	25.7466	26.5433	25.8118	26.2856	25.3135	25.4105	26.2517	25.3578	25.9738
BNIP2	BCL2/adenovirus E1B 19 kDa protein-interacting protein 2	H7C096;Q12982;Q12982-2	28.3989	27.9239	27.7704	28.1404	28.0847	28.0898		-0.258525	0.8568		0.160801	0.853238		0.319468	0.683621			0.753727		28.1842	28.6216	28.391	27.4938	28.2535	28.0243	27.8264	28.0453	27.4394	28.2354	28.6492	28.066	27.611	28.1556	27.9428	28.0608	28.1795	28.189	27.8682	28.3153	27.9869
BOLA2	BolA-like protein 2	Q9H3K6	27.8434	27.8714	27.8142	27.7934	27.873	27.8453		-0.0499899	0.971028		0.00156291	0.998608		0.0311308	0.970761			1		27.6389	27.9428	27.9484	27.5826	27.8858	28.1459	27.5014	27.7195	28.2216	28.2262	28.0965	27.5014	27.3494	27.5315	27.7064	27.965	28.2891	27.4707	27.8385	28.1015	27.9705
BPNT1	3(2),5-bisphosphate nucleotidase 1	B4DUS9;O95861;C9JI50;O95861-2;A6NF51;F8W1J0	26.9905	27.0822	27.0194	27.1342	27.2754	27.388		0.143732	0.846917		0.193191	0.715727		0.368638	0.567347			0.499239		26.8142	27.2714	26.8858	27.1984	26.9977	27.0505	27.2354	26.7518	27.0711	27.1507	27.17	27.2077	27.0084	27.4314	27.341	27.2077	27.1214	27.1604	27.5463	27.3066	27.5389
BRAF	Serine/threonine-protein kinase B-raf;RAF proto-oncogene serine/threonine-protein kinase	H7C560;P15056;B4E1N6;H7C155;B4E0X2;P04049;P04049-2	23.7783	24.1257	24.5882	24.5537	24.2051	24.5948		0.775328	0.818099		0.0793791	0.988187		0.00664393	0.990701			0.91537		24.3712	22.515	24.4488	22.8067	24.6209	24.9495	24.5522	24.5638	24.6486	24.7182	24.7077	24.824	23.9649	24.7594	22.7384	24.7645	24.558	24.2635	24.7645	24.5869	24.7645
BRCC3	Lys-63-specific deubiquitinase BRCC36	P46736-3;H9KVA9;P46736-4;P46736-2;P46736	25.8889	25.9831	26.0957	25.3079	26.2133	26.0604		-0.580992	0.905294		0.230198	0.843049		-0.0352848	0.959613			0.91549		25.9977	25.867	25.8019	25.5754	26.0691	26.3049	26.2244	25.8385	26.2244	25.9998	26.0148	22.893	26.3239	26.524	26.1757	26.1135	26.0401	25.9672	25.9157	25.9338	26.425
BRE	BRCA1-A complex subunit BRE	Q9NXR7;F8W733;Q9NXR7-4;Q9NXR7-3;Q9NXR7-1;C9J2G0;H7BYD8	26.4673	26.2744	26.505	26.4139	26.4961	26.2804		-0.0534665	0.9567		0.221641	0.841568		-0.224645	0.513579			0.916025		26.3778	26.673	26.3511	25.9825	26.141	26.6998	26.4984	26.4645	26.5522	26.3778	26.673	26.5898	26.0148	26.7771	26.3545	26.4815	26.3712	26.2354	26.452	26.1293	26.3049
BRK1	Protein BRICK1	F5H577;Q8WUW1;Q8WUW1-2	27.7153	27.8027	27.6793	27.575	27.6907	27.8885		-0.140361	0.919136		-0.111925	0.933051		0.20919	0.797996			0.955453		28.2262	27.6663	27.2535	27.8858	27.5463	27.976	27.7325	27.6527	27.6527	27.2445	27.8445	27.4785	27.7325	27.4862	27.2077	28.1263	27.9428	28.2308	27.4551	28.066	27.8019
BROX	BRO1 domain-containing protein BROX	B7Z9G5;Q5VW32;F5GXQ0	27.6783	27.707	27.6396	27.8256	27.7186	27.8772		0.147297	0.854		0.0115684	0.993806		0.237628	0.713173			0.930792		27.5898	27.7453	27.6998	27.5536	27.4862	28.0813	27.5315	27.5014	27.8858	27.7129	28.1842	27.7389	27.6663	27.9705	27.4473	27.9705	27.4862	27.6595	28.1214	27.8019	27.9259
BSDC1	BSD domain-containing protein 1	B4DM89;C9JB13;Q9NW68-2;Q9NW68;Q9NW68-8;Q9NW68-7;Q9NW68-3;Q9NW68-5;Q9NW68-9	24.8986	23.5789	24.3592	23.784	23.6135	24.0322		-1.11467	0.815689		0.0346166	0.995317		-0.327073	0.901144			0.900184		24.918	24.7129	25.065	24.6153	24.1946	21.9269	24.7024	24.5105	23.8648	24.824	25.0275	22.5251	22.7593	23.3194	22.6938	24.1448	24.2961	22.9395	23.517	24.4738	25.1984
BSG	Basigin	I3L4S8;I3NI00;P35613-2;P35613;I3L1R4;I3L192;P35613-3;P35613-4;I3L4L2	26.767	26.8444	26.9557	26.3057	25.5326	25.4786		-0.461259	0.742736		-1.3118	0.775199		-1.47708	0.706269			0.751755		26.8623	26.6998	26.7389	26.965	26.6595	26.9089	26.6998	27.341	26.8264	26.1273	26.0338	26.4298	26.632	26.2207	26.0169	23.381	26.512	26.1371	26.3712	23.0251	26.3811
BTBD11	Ankyrin repeat and BTB/POZ domain-containing protein BTBD11	A6QL63-3;A6QL63;A6QL63-2;E9PHS4	24.6295	23.7745	23.3713	24.1107	24.5188	24.2586		-0.518842	0.788858		0.744311	0.707076		0.887342	0.716635			0.631906		24.4984	24.9628	24.4274	23.7695	23.8093	23.7445	22.3464	24.239	23.5285	23.9225	24.5696	23.6971	24.2535	25.1795	24.824	24.2821	23.7895	24.0443	24.2244	23.5638	25.2021
BTK	Tyrosine-protein kinase BTK	Q06187;Q5JY90	31.0363	31.2052	31.148	31.2182	31.2248	31.2219		0.181898	0.74535		0.0195788	0.98476		0.0739274	0.822905			0.848277		31.0673	31.13	30.9117	31.0283	31.1842	31.4032	31.1724	31.1053	31.1664	31.1604	31.1604	31.362	31.1901	31.2647	31.1604	31.4134	31.0608	31.0544	31.2422	31.2135	31.3776
BZW1	Basic leucine zipper and W2 domain-containing protein 1	Q7L1Q6;Q7L1Q6-4;Q7L1Q6-3;Q7L1Q6-2;C9IZ80	27.8899	27.8918	27.7082	27.872	28.0347	27.985		-0.0178965	0.977182		0.142886	0.841		0.276788	0.555868			0.799281		27.8081	27.7958	28.066	27.7771	27.8741	28.0243	27.726	27.7325	27.6663	27.9031	28.0711	27.8142	27.6998	28.3828	27.976	28.003	27.7771	28.0243	28.0914	27.6931	28.1312
BZW2	Basic leucine zipper and W2 domain-containing protein 2	E7ETZ4;Q9Y6E2;B5MCE7;Q75MG1;B5MCH7	26.7663	26.7675	26.5063	26.579	26.6812	26.4955		-0.187293	0.848139		-0.0863045	0.864306		-0.0108596	0.986571			0.834681		26.9539	26.7129	26.632	26.726	26.8504	26.726	26.4645	26.4892	26.5653	26.2571	26.7771	26.4923	26.7895	26.518	26.5448	26.7645	26.8973	26.4567	26.726	26.0995	26.6998
C10orf11	Leucine-rich repeat-containing protein C10orf11	A6NG64;Q9H2I8	24.8366	24.0147	23.7971	24.0772	24.1677	24.0411		-0.759434	0.823249		0.153059	0.98222		0.24399	0.947645			0.948344		24.8433	25.0854	24.5812	24.5165	24.8764	22.651	24.2317	23.066	24.0935	23.9406	23.0919	24.8528	24.4234	22.348	24.8044	24.7796	24.7389	24.7746	23.9847	24.8288	22.5761
C10orf54	Platelet receptor Gi24	H0Y2M9;Q9H7M9	26.2935	26.4427	26.5977	24.8695	24.6084	24.9877		-1.42403	0.79696		-1.83421	0.713665		-1.61	0.757633			0.74113		26.2926	26.4567	26.1312	26.6595	26.2661	26.4024	26.6998	26.4614	26.632	23.2533	24.5327	25.4862	26.2058	23.4661	26.0041	23.0895	25.8741	26.8385	22.178	26.4862	24.4482
C10orf76	UPF0668 protein C10orf76	Q5T2E6	25.2252	24.8892	25.1507	25.0313	25.1807	24.9846		-0.193859	0.88643		0.291462	0.747729		-0.166117	0.865664			0.915445		24.8481	25.1984	25.6292	24.9672	24.824	24.8764	24.8623	25.4645	25.1253	25.3745	25.1681	24.7492	24.8336	25.341	25.4266	25.1214	24.8336	24.8904	24.9539	24.7129	25.3811
C11orf54	Ester hydrolase C11orf54	Q9H0W9-2;Q9H0W9;E9PJU8;E9PQS1;Q9H0W9-4;Q9H0W9-3;E9PPB5	27.3146	27.1578	27.2225	27.2908	27.4715	27.3871		-0.0238212	0.977757		0.313744	0.581397		0.164581	0.865639			0.870047		27.1795	27.341	27.4234	27.141	27.0084	27.3239	27.1312	27.6389	26.8973	27.189	27.6458	27.217	27.1115	27.341	27.4938	27.604	27.4473	27.2262	27.5682	27.2077	27.5463
C11orf68	UPF0696 protein C11orf68	Q9H3H3;Q9H3H3-2;Q9H3H3-3	24.6295	23.9529	23.4934	23.9632	23.9471	24.1316		-0.666212	0.859079		-0.00578133	0.998519		0.638185	0.860297			0.967921		24.8764	24.632	24.3799	24.7945	22.449	24.6153	21.7032	24.0854	24.6918	24.7441	23.9481	22.2611	24.8997	24.632	25.1214	22.4875	23.5476	24.1332	24.6264	23.4098	24.357
C11orf73	Protein Hikeshi	Q53FT3;E9PPG8	25.3758	26.0455	26.1823	26.2138	25.8154	26.238		0.837923	0.814723		-0.230162	0.934233		0.0556237	0.965572			0.891096		25.5492	24.2121	26.3662	25.8191	26.0443	26.2732	25.8433	26.4831	26.2207	26.5492	26.0422	26.4815	25.7821	24.4512	26.4923	26.3031	26.0148	26.48	26.726	25.6891	26.0567
C12orf10	UPF0160 protein MYG1, mitochondrial	F8VR84;Q9HB07;F8VQQ3;F5H641	24.5391	24.1175	25.0689	25.1238	25.2172	25.2474		0.584723	0.855737		1.09969	0.638998		0.178438	0.734522			0.634622		25.2021	25.3066	23.1085	25.0233	23.4548	23.8743	24.824	25.2535	25.1293	24.9584	25.4707	24.8528	25.2133	25.3376	24.9584	25.1719	25.4008	25.1908	25.4105	25.1095	25.2785
C14orf166	UPF0568 protein C14orf166	Q9Y224;G3V4C6	27.204	27.0784	27.3785	27.2458	27.3226	27.3927		0.041859	0.968764		0.244181	0.796432		0.0142172	0.986849			0.913674		27.4314	26.7895	27.391	27.2077	27.0084	27.019	27.0296	27.5969	27.509	27.5165	27.0711	27.1604	27.2354	27.6663	27.0711	27.4314	27.1214	26.9977	27.5609	27.4154	27.5969
C15orf52	Uncharacterized protein C15orf52	Q6ZUT6-2;Q6ZUT6-4;Q6ZUT6	23.8964	24.9932	23.9432	24.7365	23.3042	23.5769		0.840045	0.77347		-1.68902	0.733638		-0.366282	0.948762			0.814615		24.7182	23.2529	23.7182	24.6264	25.4862	24.867	25.0732	22.3075	24.4488	24.7492	25.1214	24.6264	24.4488	21.482	24.7645	24.0935	22.8769	23.3819	21.7634	24.5926	24.5696
C16orf62	UPF0505 protein C16orf62	Q7Z3J2;G5E9I3;E7EWW0;F5H7K1;H3BVG8;C9J7I2;Q7Z3J2-2	25.3854	25.2389	25.2413	24.5351	25.1171	24.1129		-0.850299	0.849247		-0.121744	0.895187		-1.12845	0.747521			0.843341		25.4138	25.3745	25.3679	24.9933	25.1449	25.5783	25.2856	25.341	25.0975	25.2499	22.39	25.1527	25.3477	25.1757	25.2317	25.317	24.7441	25.4645	22.4073	25.1449	23.4349
C17orf59	Uncharacterized protein C17orf59	Q96GS4	24.4891	24.9054	24.6214	25.0501	25.0023	24.2191		0.561067	0.847421		0.096868	0.903291		-0.402304	0.910205			0.910769		23.196	25.2021	25.0691	24.654	24.7695	25.2926	24.4362	24.604	24.824	24.9977	24.895	25.1095	25.1984	25.0691	25.1449	24.976	24.8191	24.8623	25.0359	22.0331	24.945
C17orf75	Protein Njmu-R1	Q9HAS0	24.8548	24.0299	24.3664	24.5125	24.7518	23.8586		-0.342277	0.898451		0.721843	0.760689		-0.507852	0.852443			0.848245		24.8764	24.9803	24.7077	24.4298	23.0903	24.5696	24.4923	24.1332	24.4738	24.9134	23.3452	25.5165	24.275	24.8433	25.1488	24.5105	24.5045	24.8528	23.3264	22.6568	24.5983
C19orf25	UPF0449 protein C19orf25	Q9UFG5;E7EP72;Q9UFG5-2	23.6701	23.5017	23.5776	24.0748	23.941	23.8984		0.404723	0.913744		0.439276	0.89828		0.320738	0.905993			0.995977		23.0515	23.6092	24.3496	22.0923	23.7534	24.6595	22.6981	23.9495	24.0854	24.4923	25.4676	23.4239	22.9155	24.8175	23.8054	22.9768	24.1642	22.7734	23.7157	24.0854	25.019
C19orf66	UPF0515 protein C19orf66	Q9NUL5-2;Q9NUL5	19.5159	21.2227	23.1849	21.1498	23.2953	22.6247		1.63389	0.812572		2.07252	0.738022		-0.560234	0.893576			0.373671		19.2741	19.9363	19.3372	19.9978	20.1159	23.5545	22.8807	23.8829	22.7911	19.7869	22.8354	22.6553	19.3214	23.1154	23.2884	24.3888	22.3884	23.736	23.3559	20.1916	23.2152
C1orf123	UPF0587 protein C1orf123	Q9NWV4	27.7543	28.3916	27.9955	27.9776	27.9224	28.1487		0.22328	0.88307		-0.469214	0.757409		0.153255	0.902412			0.85073		28.2803	27.4073	27.5754	28.189	28.3367	28.6492	27.8203	27.6458	28.5203	27.8858	28.4113	27.9202	27.6931	28.217	27.7708	28.3109	27.391	27.7518	28.341	28.0084	28.4938
C1orf198	Uncharacterized protein C1orf198	Q9H425;G5EA08;A8K8R8;E5RI90	28.196	28.2875	28.2215	28.2671	28.2097	28.2437		0.071102	0.917422		-0.0778317	0.895542		0.0222654	0.95613			0.9996		28.1459	27.9869	28.4551	28.1842	28.267	28.4113	28.249	28.2891	28.1263	28.267	28.3239	28.391	28.0864	28.3787	28.189	28.3452	27.9259	28.0762	28.3704	28.1747	28.3536
C1orf50	Uncharacterized protein C1orf50	Q9BV19	23.3647	24.2561	23.8159	24.0159	23.8383	23.6724		0.651168	0.833191		-0.417777	0.742797		-0.143421	0.912865			0.839722		23.9406	22.2865	23.867	24.0275	24.3239	24.417	23.9043	23.3412	24.2021	23.6865	24.6431	23.6649	24.0691	23.7961	23.6649	24.317	23.5754	23.0855	23.8238	23.867	23.9134
C1QBP	Complement component 1 Q subcomponent-binding protein, mitochondrial	Q07021;I3L3Q7;I3L3B0	26.6106	27.7446	27.7731	28.2424	28.4664	27.6697		1.63183	0.81657		0.721866	0.637754		-0.103344	0.864686			0.702006		27.8504	28.0349	23.9465	27.7325	27.509	27.9923	27.5609	28.0453	27.7129	28.8385	28.0137	28.203	27.9146	28.9117	28.362	28.6492	27.9428	27.5609	27.8081	27.7129	27.5969
C20orf27	UPF0687 protein C20orf27	Q9GZN8;Q9GZN8-2	26.1706	24.3047	23.9074	24.2218	24.5424	24.459		-1.9488	0.762481		0.237703	0.982036		0.551581	0.925027			0.902446		26.0254	26.3222	26.1642	25.7182	24.5498	22.6462	24.1894	25.1757	22.3572	26.143	24.0299	22.8907	23.8236	26.2151	23.1433	26.038	22.7733	22.7465	25.9998	26.1253	22.9644
C21orf33	ES1 protein homolog, mitochondrial	P30042;H7C1F6;H7C2G3;H7C455;P30042-2	27.016	27.3039	27.3855	27.6954	27.4687	26.6837		0.679385	0.768356		0.164763	0.871796		-0.701822	0.774014			0.685985		27.2979	26.5898	27.1604	27.2714	27.5389	27.1015	27.2077	27.4938	27.4551	27.524	27.3578	27.7833	28.1164	27.2535	27.6998	27.0711	27.8504	27.5463	26.4969	27.3239	25.3679
C2CD5	C2 domain-containing protein 5	Q86YS7;Q86YS7-2;B4DRN7;F5H2A1;F5H5R1;F5H3N1	28.0143	27.9975	27.9086	28.0225	27.8813	27.9175		0.00819524	0.993426		-0.116149	0.87262		0.00892115	0.98995			0.981085		28.1263	27.7708	28.1459	27.8564	28.0296	28.1065	27.8504	28.2714	27.604	28.2759	28.1015	27.8623	27.8504	27.524	27.9539	28.066	27.9814	27.7195	27.965	27.9146	28.0711
C2orf88	Small membrane A-kinase anchor protein	Q9BSF0	26.7086	26.8968	27.2592	26.6648	26.5671	26.5582		-0.0438638	0.979275		-0.329718	0.791161		-0.701013	0.399621			0.706667		27.1507	26.604	26.3712	26.5682	27.3578	26.7645	27.1214	27.217	27.4394	26.3578	26.604	26.2188	27.4785	26.7518	26.3187	26.6458	26.5522	26.2426	26.6595	26.4105	26.9202
C3	Complement C3;Complement C3 beta chain;C3-beta-c;Complement C3 alpha chain;C3a anaphylatoxin;Acylation stimulating protein;Complement C3b alpha chain;Complement C3c alpha chain fragment 1;Complement C3dg fragment;Complement C3g fragment;Complement C3d fragment;Complement C3f fragment;Complement C3c alpha chain fragment 2	P01024;B4E216	30.4922	30.2383	30.2642	30.3898	30.508	30.4746		-0.102399	0.849815		0.269729	0.717877		0.210406	0.7151			0.705687		30.4433	30.362	30.6714	30.0737	30.2077	30.4334	30.0479	30.393	30.3515	30.4032	30.4334	30.2308	30.4919	30.7533	30.4823	30.4032	30.393	30.341	30.5664	30.3196	30.6714
C3orf58	Deleted in autism protein 1	Q8NDZ4	24.7171	24.2521	24.4301	24.4147	23.6284	23.7356		-0.302344	0.747382		-0.623741	0.82562		-0.694484	0.673171			0.545481		24.6649	24.6431	24.8433	23.8157	24.3031	24.6376	24.391	24.5754	24.3239	24.5344	24.2535	24.632	24.239	22.9518	24.0526	24.5285	22.9806	22.776	24.239	23.7865	24.141
C4A;C4B	Complement C4-A;Complement C4 beta chain;Complement C4-A alpha chain;C4a anaphylatoxin;C4b-A;C4d-A;Complement C4 gamma chain;Complement C4-B;Complement C4 beta chain;Complement C4-B alpha chain;C4a anaphylatoxin;C4b-B;C4d-B;Complement C4 gamma chain	B0UZ83;Q5JNX2;B0V2C8;Q6U2E9;A2BHY4;F8VZD8;F8VW91;F8VSI2;P0C0L5;P0C0L4;F8VX64;F8VNV9;F5GXS0;A6H8M8	27.2199	27.0046	26.9367	27.2033	27.2044	27.3415		-0.0166294	0.988375		0.199775	0.843415		0.404811	0.651933			0.859668		27.5463	26.7389	27.3745	27.0296	26.6181	27.3662	27.17	26.7895	26.8504	27.4154	27.2979	27.0084	27.0914	27.2891	27.1604	27.2077	27.1604	27.7708	27.3153	27.0084	27.2714
C4BPA	C4b-binding protein alpha chain	P04003	23.6266	23.353	23.19	25.3538	25.6286	26.2485		1.7272	0.659754		2.27561	0.0406575		3.05843	0.184233		+	0.000121953		23.7715	23.1666	23.9416	23.3438	23.5931	23.1222	23.9674	22.3323	23.2704	24.9495	25.5315	25.4266	25.5075	25.8717	25.7103	25.3342	25.5983	25.9473	26.1115	26.4536	26.4815
C4orf33	UPF0462 protein C4orf33	Q8N1A6;D6RIT3	24.6887	24.2244	23.7604	24.3664	24.7296	23.9743		-0.322348	0.819497		0.505226	0.736352		0.213874	0.953261			0.814902		25.0608	24.5754	24.4298	24.1253	23.9495	24.5983	24.4923	24.4488	22.3402	24.5869	24.5225	23.9134	24.4425	25.1449	24.5754	24.317	24.8811	24.5926	24.5285	23.0214	23.7548
C5	Complement C5;Complement C5 beta chain;Complement C5 alpha chain;C5a anaphylatoxin;Complement C5 alpha chain	P01031;H0Y4U2	25.4847	25.3458	24.9731	23.8554	24.7269	24.6364		-1.6293	0.824816		-0.618905	0.840646		-0.336644	0.884857			0.832544		25.2785	25.2463	25.9293	25.1833	25.3376	25.5165	25.2096	24.239	25.4707	25.3778	22.6384	25.141	22.2644	23.0347	24.9406	25.4008	25.5315	25.1681	23.5464	24.9977	24.8336
C5orf51	UPF0600 protein C5orf51	A6NDU8	27.1395	27.1976	27.1997	27.1016	27.2522	27.3713		-0.0378784	0.957961		0.054613	0.869804		0.171591	0.716583			0.699885		26.976	27.1015	27.341	27.1795	27.1507	27.2625	27.2077	27.341	27.0505	27.2445	27.189	27.019	26.9539	27.1015	27.3578	27.3325	27.217	27.2979	27.611	27.2354	27.341
C7orf25	UPF0415 protein C7orf25	Q9BPX7	25.6483	25.9812	25.4656	25.3871	25.5363	25.8629		-0.261236	0.817994		-0.444874	0.770409		0.397343	0.378991			0.555755		25.452	25.4953	25.9977	25.8576	25.8858	26.2002	25.4551	25.5638	25.3778	25.2996	25.1253	25.6403	25.4831	25.1795	25.4234	26.1946	25.3477	26.0105	25.7895	25.6757	25.976
C8A	Complement component C8 alpha chain	P07357	24.081	23.5708	22.2652	23.6266	23.6344	22.9154		-0.454375	0.856512		0.0635905	0.987953		0	0			0.768008		24.0854	24.1642	23.9933	24.019	22.1105	24.583	23.7035	20.9178	22.1743	24.0772	24.3724	23.5483	22.5085	23.7503	23.2809	24.0158	23.4907	23.8837	21.9827	21.9383	23.8569
C9orf64	UPF0553 protein C9orf64	Q5T6V5;Q5T6V7	25.4075	25.0962	24.9806	25.1516	24.7315	25.0773		-0.255919	0.7347		-0.364723	0.828784		0.0966918	0.893404			0.612413		25.5374	25.4425	25.2426	25.0105	25.1253	25.1527	24.9539	25.1984	24.7895	25.1214	25.0975	25.2821	25.1055	23.9537	25.0608	25.0443	24.867	24.9089	25.2785	24.8576	25.2643
C9orf89	Bcl10-interacting CARD protein	Q96LW7-2;Q96LW7	25.0555	24.871	25.1073	25.049	25.1054	25.109		-0.00649277	0.99376		0.234452	0.665748		0.0016702	0.99909			0.947125		25.0732	25.1527	24.9406	24.8093	24.9225	24.8811	25.0526	25.4551	24.8142	25.0691	25.1293	24.7695	25.228	25.3376	25.0691	24.9584	25.0567	25.0894	25.4041	24.558	25.3844
CA1	Carbonic anhydrase 1	P00915;E5RH81;E5RHP7;E5RIF9;E5RG43;E5RFE7;E5RGU8;E5RFL2;H0YBE2	25.168	25.6146	23.6122	26.8535	27.1242	26.6394		1.68549	0.809441		1.50962	0.739917		3.0272	0.514056			0.374608		25.792	22.973	26.7389	26.3762	25.0443	25.4234	25.5492	23.1504	22.1369	26.673	27.4234	27.4551	25.8623	28.9732	26.5389	26.673	26.3118	26.6998	28.2891	25.7594	25.8093
CA13	Carbonic anhydrase 13	Q8N1Q1	27.803	27.9303	27.9538	28.0002	28.2138	28.0981		0.197165	0.846732		0.283479	0.642911		0.144334	0.877034			0.780839		28.0557	27.7708	27.5826	28.0243	27.7581	28.0084	28.3704	27.611	27.8799	27.9259	28.2714	28.0453	27.7581	28.3325	28.2714	28.2535	27.9977	28.2077	27.9146	28.2354	28.0349
CA2	Carbonic anhydrase 2	P00918	31.9547	31.846	31.92	31.8101	31.8659	31.9149		-0.144533	0.890967		0.0198946	0.978322		-0.00514905	0.995847			0.993825		31.8157	31.7613	32.2869	31.901	31.6285	32.0084	31.781	31.8645	32.1146	32.0479	31.8081	31.8973	31.4871	31.9539	31.8234	31.7888	31.8973	32.3115	31.7129	31.8347	31.8004
CAB39	Calcium-binding protein 39	Q9Y376	29.018	28.7688	28.9011	28.7616	28.6858	28.812		-0.256407	0.811402		-0.0829587	0.853177		-0.089043	0.860394			0.680063		28.8415	29.1337	29.0788	28.8324	28.5536	28.9202	28.9622	28.9146	28.8264	28.8355	28.4668	28.9146	28.8294	28.611	28.6629	28.6798	28.7895	28.8385	28.5862	29.0401	28.7833
CACYBP	Calcyclin-binding protein	Q9HB71;Q5R370;B3KSF1	27.6751	28.0033	27.8507	28.1378	27.9628	28.0089		0.462694	0.113214		-0.040459	0.9816		0.158179	0.77404			0.624068		27.6663	27.7064	27.6527	27.7771	28.1312	28.1015	27.6798	28.1015	27.7708	28.0914	28.2077	28.1556	28.0965	28.4473	27.7129	27.9202	27.7708	28.1263	28.1263	27.8682	27.9146
CAD	CAD protein;Glutamine-dependent carbamoyl-phosphate synthase;Aspartate carbamoyltransferase;Dihydroorotase	F8VPD4;P27708	28.519	28.545	28.5197	28.5575	28.663	28.6576		0.0385521	0.943218		0.11794	0.798902		0.137914	0.743325			0.867488		28.604	28.4938	28.4591	28.5826	28.4274	28.6251	28.4154	28.579	28.5646	28.6004	28.7676	28.3951	28.4668	28.5898	28.5718	28.8173	28.673	28.5898	28.8945	28.5315	28.6146
CALCOCO1	Calcium-binding and coiled-coil domain-containing protein 1	Q9P1Z2-2;Q9P1Z2-3;Q9P1Z2;E7EWT6;Q9P1Z2-4;E9PGB0	27.9769	28.1597	27.9537	27.9486	28.0089	27.8869		-0.0282345	0.979945		-0.150851	0.811134		-0.0668019	0.867988			0.914267		28.2847	28.0349	27.611	28.3109	28.003	28.1652	27.8564	27.9031	28.1015	28.2535	27.8019	27.9372	27.8019	27.8203	28.0401	27.9814	28.1937	27.7325	27.9595	27.8741	27.9814
CALD1	Caldesmon	Q05682-4;Q05682-2;Q05682;Q05682-6;C9J813	32.9285	33.1111	32.884	32.9236	32.8481	33.0166		-0.00492509	0.992733		-0.263008	0.756667		0.132594	0.79288			0.835053		32.9814	32.9452	32.859	32.9967	33.3033	33.0332	32.8627	32.8422	32.947	33.0673	32.8792	32.9967	32.7514	32.5132	32.9695	32.9452	32.9643	33.0463	32.8956	33.2897	32.8347
CALM1	Calmodulin	H0Y7A7;P62158;E7ETZ0;E7EMB3;Q96HY3;G3V361	33.633	33.8907	33.9283	33.5921	33.7099	33.7685		-0.0408332	0.947481		-0.180805	0.748332		-0.159733	0.765605			0.543902		33.7047	33.5527	33.6415	33.8328	33.933	33.9063	33.8974	33.8042	34.0832	33.4209	33.7047	33.7849	33.4581	33.6415	33.7946	33.8974	33.5062	33.5527	33.7252	34.0017	33.7946
CALR	Calreticulin	P27797	32.586	32.866	32.7258	32.6822	32.7739	32.7359		0.096214	0.877534		-0.0921176	0.874509		0.0101166	0.986814			0.914592		32.7454	32.333	32.6798	32.717	32.8627	33.0184	32.8774	32.5132	32.7868	32.6522	32.5934	32.7849	32.6985	32.8347	32.7353	32.9983	32.5273	32.4532	32.8403	33.0217	32.6285
CALU	Calumenin	O43852-3;O43852;F5H4F5;F5H1Q9;H0Y875	29.6688	29.7602	29.817	29.6843	29.4916	29.4615		0.0155482	0.985782		-0.268552	0.713104		-0.355538	0.546918			0.71026		29.6865	29.6251	29.6948	29.7597	29.7786	29.7421	29.94	29.7771	29.7341	29.9814	29.2535	29.8142	29.6881	29.3971	29.8234	29.4113	29.3346	29.6612	29.3088	29.673	29.203
CAMK1	Calcium/calmodulin-dependent protein kinase type 1	Q14012;H7C071	30.0248	30.2672	30.2114	29.9905	30.048	30.1069		-0.0342396	0.95412		-0.219123	0.734419		-0.104595	0.845063			0.702351		30.1115	29.9814	29.9814	30.2869	30.1842	30.3303	30.2647	30.0608	30.3088	30.0349	30.1115	30.0608	29.7549	30.2077	29.8188	30.1842	29.9814	29.8726	30.1724	30.0737	30.3088
CAMK2B	Calcium/calmodulin-dependent protein kinase type II subunit gamma;Calcium/calmodulin-dependent protein kinase type II subunit beta	Q5SWX3;Q13555-10;Q13555-5;Q13555-4;Q13555-3;Q13555-7;Q13555-9;Q13555-2;Q13555-8;Q13555;Q13555-6;Q8WU40;H0Y6G2;Q13554-7;Q13554-4;Q13554-6;Q13554-3;Q13554-8;Q13554-5;Q13554-2;Q13554	27.0381	27.0651	26.9524	27.1394	26.9814	27.0735		0.101236	0.848843		-0.0837522	0.920859		0.12108	0.816587			0.935604		26.965	27.0084	27.141	27.1214	26.9428	27.1312	26.7771	27.0296	27.0505	26.976	27.17	27.2803	27.1312	27.019	26.726	27.391	26.7895	26.8385	27.1015	27.0914	27.2625
CAMK2D	Calcium/calmodulin-dependent protein kinase type II subunit delta	D6R938;E9PBG7;E9PF82;Q13557-8;Q13557-12;Q13557-10;Q13557;Q13557-6;Q13557-11;Q13557-9;Q13557-5;Q13557-3;Q13557-4	24.6765	24.0094	25.2191	24.8863	25.2452	25.0759		0.209783	0.971047		1.23573	0.839966		-0.143123	0.958555			0.961372		25.2891	25.2643	23.4762	25.0484	21.7084	25.2714	25.0233	25.1601	25.4738	22.5215	26.0169	25.8312	25.1757	26.1449	23.3834	25.9847	25.4676	23.3731	25.8385	25.1449	25.9473
CAND1	Cullin-associated NEDD8-dissociated protein 1	Q86VP6;Q86VP6-2	31.3033	31.2452	31.2613	31.3754	31.3515	31.3817		0.0720658	0.818194		0.106306	0.828563		0.120423	0.742117			0.849326		31.2869	31.3142	31.3088	31.1422	31.1901	31.4032	31.3357	31.1724	31.2759	31.3828	31.4727	31.3982	31.2478	31.4184	31.2077	31.4284	31.3515	31.2869	31.4032	31.2703	31.5664
CANX	Calnexin	P27824;B4E2T8;H0Y9Q7	29.0048	29.4489	29.7099	28.5592	28.8608	29.1162		-0.44565	0.815954		-0.588109	0.383536		-0.593725	0.273614			0.104076		29.258	28.8504	28.906	29.4254	29.4919	29.4294	29.4727	29.7771	29.8799	28.5389	28.1263	28.267	29.3044	28.8887	28.6527	29.189	28.7129	29.1676	28.9896	29.2262	29.0813
CAP1	Adenylyl cyclase-associated protein 1	Q01518;F5H6Z3	33.7768	33.6687	33.6414	33.6932	33.8066	33.8598		-0.0836496	0.877844		0.137896	0.422199		0.21837	0.244487			0.377142		33.8422	33.684	33.8042	33.6944	33.5866	33.7252	33.6415	33.6198	33.6629	33.6629	33.8328	33.7946	33.4823	33.8138	33.8042	33.8138	33.7946	33.9241	33.8883	33.8516	33.7751
CAPN1	Calpain-1 catalytic subunit	P07384;H7C5Z3	33.1065	33.0645	33.0569	33.1468	33.1741	33.152		0.0403903	0.925543		0.109621	0.80922		0.0950912	0.798783			0.922032		33.2193	33.1068	32.9933	33.0512	33.0528	33.0896	33.0927	33.1052	32.9729	33.1813	33.2619	33.1679	32.9763	33.2062	33.1068	33.3568	33.0266	33.0233	33.2897	33.0332	33.2619
CAPN2	Calpain-2 catalytic subunit	H0Y323;P17655	27.5988	27.5862	27.7927	27.7139	27.6255	27.8067		0.115147	0.856985		0.0393108	0.973262		0.0140514	0.980934			0.909094		27.4785	27.6181	27.6998	27.3239	27.6389	27.7958	27.8682	27.7645	27.7453	27.8142	27.8799	27.7064	27.4551	27.7895	27.5536	27.8264	27.3325	27.8324	27.8682	27.4551	28.0711
CAPN7	Calpain-7	Q9Y6W3	23.8161	23.9387	22.9591	24.0595	23.8575	23.6753		0.243391	0.931096		-0.0811502	0.981082		0.716258	0.772438			0.868665		24.1341	24.2961	23.018	23.5025	24.3578	23.9558	24.1135	22.1763	22.5873	24.7846	24.2891	22.918	24.2463	24.2535	23.008	23.7073	24.4614	24.4362	23.7995	23.2451	23.2205
CAPNS1	Calpain small subunit 1	P04632	31.9351	31.6352	31.7826	31.8085	31.8013	31.8437		-0.126601	0.849484		0.166094	0.735625		0.0610706	0.886602			0.728893		31.8682	31.7888	32.1483	31.6798	31.6458	31.5799	31.8347	31.7088	31.8042	31.7888	31.8645	31.9435	31.6372	31.9081	31.7088	31.9294	31.6586	31.9188	31.9188	31.9259	31.611
CAPZA1	F-actin-capping protein subunit alpha-1	P52907	31.1676	31.6285	31.5999	31.2602	31.384	31.5447		0.0926325	0.854285		-0.244468	0.824152		-0.0552025	0.895553			0.378547		31.2193	31.1783	31.1053	31.2365	31.6372	32.0117	31.5799	31.5109	31.7088	31.2814	31.4083	31.3033	31.0479	31.2135	31.3879	31.5062	31.4284	31.4433	31.4727	31.5014	31.7613
CAPZA2	F-actin-capping protein subunit alpha-2	P47755;F8W9N7;B4DE01	32.1852	32.3169	32.2732	32.2365	32.197	32.2703		0.0512377	0.914489		-0.119941	0.899104		-0.00288582	0.994814			0.99265		32.1239	32.1177	32.3142	32.1783	32.1813	32.5911	32.3061	32.2048	32.3088	32.3115	32.3223	32.2675	32.0447	32.3594	32.0283	32.5319	31.8682	32.0447	32.3594	32.2563	32.4209
CAPZB	F-actin-capping protein subunit beta	P47756-2;B1AK87;B1AK88;E7EQ40	32.9518	32.9723	33.1075	33.0908	33.1347	33.1772		0.139052	0.812247		0.162399	0.803114		0.0696211	0.884472			0.799693		33.1146	32.9365	32.8042	32.978	32.8385	33.1006	33.1783	32.966	33.1783	33.0832	33.1161	33.1842	32.9797	33.2048	33.1664	33.2759	32.8919	33.0283	33.1842	33.1006	33.3956
CARD16	Caspase recruitment domain-containing protein 16	Q5EG05-2;Q5EG05;E9PQW1	24.8471	24.7696	24.5328	24.1965	24.5225	24.6965		-0.650588	0.814619		-0.247111	0.914142		0.163698	0.947675			0.938914		24.7234	25.0894	24.7286	24.9406	24.9225	24.4457	24.417	24.7645	24.417	24.7796	23.8191	24.9134	23.2741	23.8559	25.4425	23.7895	25.002	25.654	25.065	24.3101	23.757
CARD6	Caspase recruitment domain-containing protein 6	Q9BX69	26.3245	22.6532	25.892	26.388	24.2867	24.4937		0.0634772	0.998301		1.63342	0.804521		-1.39828	0.867404			0.804897		28.2979	22.9239	27.7518	21.9815	22.5715	23.4067	27.4862	27.3662	22.8236	26.5754	27.5754	28.3704	23.0307	24.2638	27.0084	23.3949	22.4796	27.7645	22.2978	23.7316	24.181
CARD8	Caspase recruitment domain-containing protein 8	Q9Y2G2;G3XAM9;E9PEM7	24.2535	24.3626	24.3017	24.515	22.7959	24.1378		0.261515	0.830809		-1.5667	0.377355		-0.163863	0.940369			0.104052		24.2535	24.2463	24.2607	24.317	24.0526	24.7182	24.2891	24.3843	24.2317	24.5045	25.0091	24.3443	24.2021	23.6742	22.6695	22.4784	22.3614	23.4879	24.3578	23.639	25.0667
CARHSP1	Calcium-regulated heat stable protein 1	Q9Y2V2	23.3318	23.4523	23.7602	23.9911	24.4121	23.1683		0.659293	0.848065		0.95975	0.751989		-0.59195	0.787338			0.762898		24.4234	22.1823	23.3896	23.7037	23.8888	22.7644	24.417	23.1322	23.7314	23.895	24.6264	23.7855	23.6573	25.2548	24.1488	24.8054	23.4392	24.2009	22.8998	22.9407	22.6316
CARKD	ATP-dependent (S)-NAD(P)H-hydrate dehydratase	B4DKX7;Q8IW45;Q8IW45-2;Q8IW45-4;B4DQR1	24.7315	24.7656	24.6786	25.138	25.1747	25.0597		0.406483	0.77576		0.409172	0.734904		0.381094	0.705437			0.59937		24.6918	24.8433	24.6595	24.4923	24.6595	25.1449	24.7645	24.4425	24.8288	24.8528	25.141	25.5014	25.0567	25.0691	24.918	25.2821	25.4298	24.8811	25.0526	24.7182	25.5869
CARM1	Histone-arginine methyltransferase CARM1	Q86X55-1;Q86X55;Q86X55-2	24.5379	24.4377	23.3741	24.633	24.3556	24.6566		0.0950756	0.961547		-0.08218	0.984028		1.28247	0.483907			0.645305		24.4614	24.6971	24.4551	24.4362	24.7389	24.1381	24.2678	23.2922	22.5623	24.9584	23.7005	24.6486	25.2244	24.5225	23.0821	24.6649	25.1527	24.654	24.6153	24.5926	24.7645
CARS	Cysteine--tRNA ligase, cytoplasmic	P49589;P49589-3;B4DKY1;P49589-2;A8MVQ3	27.2257	27.315	27.1946	27.3484	27.3885	27.4567		0.122744	0.91491		0.0734839	0.914208		0.262097	0.64769			0.917627		27.3578	27.2077	27.1115	27.1312	27.217	27.5969	27.2445	27.1984	27.141	27.2445	27.9089	27.1795	27.0608	27.6181	27.2979	27.3578	27.2803	27.217	27.673	27.2979	27.6389
CASP2	Caspase-2;Caspase-2 subunit p18;Caspase-2 subunit p13;Caspase-2 subunit p12	C9JRS0;P42575-2;P42575	24.6644	23.9229	24.339	24.1724	23.7949	23.9035		-0.491959	0.818594		-0.127987	0.974968		-0.435462	0.875607			0.915155		24.3176	24.6865	24.989	23.1071	24.6595	24.002	24.1719	24.4738	24.3712	23.736	24.8528	23.743	24.3578	23.6071	24.1095	22.7925	24.6703	24.5754	24.9134	23.635	22.4902
CASP3	Caspase-3;Caspase-3 subunit p17;Caspase-3 subunit p12	P42574;A8MVM1	29.4117	29.394	29.397	29.3685	29.4899	29.4683		-0.0431863	0.894436		0.0959109	0.868059		0.0713301	0.938621			0.985678		29.4053	29.2891	29.5407	29.21	29.3662	29.6058	29.6697	29.104	29.4174	29.3766	29.3787	29.3971	29.3217	29.6527	29.2714	29.5609	29.4746	29.3367	29.3992	29.362	29.7755
CASP4	Caspase-4;Caspase-4 subunit 1;Caspase-4 subunit 2	P49662;F8W830;P49662-2	25.7027	25.4823	25.8105	25.1851	24.8625	24.7059		-0.517601	0.873536		-0.6198	0.846752		-1.10457	0.788303			0.914514		25.4645	25.902	25.7415	25.1095	25.6012	25.7364	25.7234	25.9847	25.7234	23.6508	25.7796	25.7695	25.5404	25.6944	25.2961	23.122	25.3376	25.5638	22.2626	25.1757	25.8215
CASP6	Caspase-6;Caspase-6 subunit p18;Caspase-6 subunit p11	P55212;D6RHU3;P55212-2	28.1002	28.106	28.0534	27.8311	27.9256	27.9647		-0.269177	0.73949		-0.180444	0.835441		-0.0886259	0.895192			0.837575		28.1842	28.0505	28.066	28.003	27.9869	28.3282	28.1015	28.1214	27.9372	28.0137	27.965	27.6998	27.6458	27.8799	27.7129	28.2354	27.8741	27.632	28.1115	27.9031	28.2123
CASP7	Caspase-7;Caspase-7 subunit p20;Caspase-7 subunit p11	B4DUB5;P55210;P55210-3;Q5SVL1;A6NF73;Q5SVL2;P55210-2	22.8444	23.4485	23.3619	23.4016	23.4923	23.9476		0	0		0.0437919	0.988569		0.585768	0.790139			0.868452		23.1775	22.2977	23.0579	23.7796	23.5869	22.9789	22.333	24.1147	23.6378	22.7389	22.7645	24.5421	23.5608	23.9455	22.9688	22.823	24.2317	24.0105	23.3667	24.0359	24.3773
CASP9	Caspase;Caspase-9;Caspase-9 subunit p35;Caspase-9 subunit p10	Q5JRU8;F8VVS7;P55211;H0Y3S8;Q5JRU2;P55211-3;P55211-2;B4E1A3	26.02	25.999	26.0338	25.1729	25.7866	25.9769		-0.847092	0.815211		-0.212457	0.869386		-0.0568916	0.952394			0.796538		26.329	25.9998	25.7312	25.9225	26.0833	25.9912	26.019	25.8764	26.2058	23.6557	25.4923	25.4362	26.1075	25.8623	25.2678	26.4378	25.5783	26.0833	25.8764	25.6153	26.3325
CASS4	Cas scaffolding protein family member 4	Q9NQ75;Q9NQ75-2	30.6852	30.841	30.8279	30.8276	30.7295	30.7816		0.142411	0.669211		-0.111469	0.849112		-0.046313	0.895991			0.908541		30.6964	30.6544	30.7047	30.6714	30.8234	31.0283	30.7047	30.8459	30.933	30.8608	30.9046	30.8157	30.7292	30.9117	30.6198	30.8385	30.5481	30.7373	30.94	30.6798	30.7692
CAST	Calpastatin	E7ESM9;G5E9D3;B7Z468;P20810-5;P20810-7;P20810-6;E7ES10;E9PCH5;E7EVY3;B7Z574;P20810-4;G5E946;P20810-2;P20810;P20810-3;E9PDE4;H0Y9H6;H0Y7F0;F8W7E0;E7EQ12	25.7734	26.0442	26.0011	26.3173	25.8444	25.8541		0.543865	0.786523		-0.199835	0.868746		-0.147078	0.884245			0.76823		25.9606	25.5285	25.8312	25.8576	25.8973	26.3778	26.0935	25.8409	26.0691	26.4346	26.5898	26.3992	25.8457	26.0732	26.0062	25.275	26.0233	25.989	25.7821	26.2607	25.3844
CAT	Catalase	P04040	31.6991	31.857	31.8307	32.0872	32.1281	32.2316		0.388045	0.691658		0.271089	0.715793		0.400926	0.487848			0.190998		31.7731	31.7533	31.5709	31.8719	32.0705	31.6285	31.8937	31.9916	31.6066	31.9814	32.3088	32.0737	31.9848	32.3303	32.0447	32.0958	32.0414	32.2869	32.4134	32.1177	32.1084
CBL	E3 ubiquitin-protein ligase CBL	P22681	27.0215	26.9509	26.8199	27.0747	27.1445	27.1617		0.0531836	0.894587		0.193606	0.774762		0.341846	0.241391			0.374337		26.9539	27.019	27.0914	26.7129	27.0084	27.1312	26.6998	26.8858	26.8741	27.0608	27.2445	26.9428	27.0505	27.2445	27.019	27.2535	27.0608	27.1015	27.1115	27.2262	27.2077
CBR1	Carbonyl reductase [NADPH] 1	P16152;E9PQ63;A8MTM1;B4DFK7	29.6861	29.9637	29.8862	29.7623	29.8904	29.8814		0.076152	0.913307		-0.0732829	0.852944		-0.00484673	0.996882			0.914977		29.8564	29.5682	29.6337	29.8916	30.0737	29.9259	29.94	29.7786	29.94	29.5736	30.0479	29.7146	29.7129	29.8324	29.7405	30.0349	29.9539	29.3766	29.995	29.9117	30.2422
CC2D1B	Coiled-coil and C2 domain-containing protein 1B	H7C1U3;Q5T0F9-2;Q5T0F9;H0Y517;G8JLF2;Q5T0F9-3	24.2941	24.8648	24.9565	24.0245	24.5388	23.6092		-0.269648	0.957777		-0.326019	0.841361		-1.34722	0.51443			0.768567		22.9548	25.0233	24.9043	24.8997	24.8904	24.8044	24.8288	25.2021	24.8385	23.2191	24.8717	22.9503	25.0567	23.7445	24.6264	25.0148	24.7695	22.9281	23.213	24.8288	23.467
CCBL2	Kynurenine--oxoglutarate transaminase 3	Q6YP21-3;Q6YP21;Q6YP21-2	24.8708	24.8857	24.9192	25.2181	25.1452	25.1188		0.347345	0.811039		0.259464	0.756478		0.199602	0.712482			0.783673		24.7492	24.7182	25.1449	24.8904	24.7995	24.9672	24.7895	24.9406	25.0275	25.065	24.895	25.2021	25.7103	25.002	24.976	25.4892	25.1135	25.4073	25.0484	24.918	25.1015
CCDC22	Coiled-coil domain-containing protein 22	O60826;F5GXW9	24.201	24.6394	24.7369	24.8122	24.3718	24.7758		0.611266	0.819161		-0.267641	0.881473		0.0388578	0.951768			0.891042		23.114	24.6649	24.824	24.6376	24.5522	24.7286	24.604	24.7492	24.8576	24.632	25.0813	24.6971	24.8385	24.5812	23.3211	24.9584	24.6264	24.5522	25.0526	24.7543	24.7441
CCDC53	WASH complex subunit CCDC53	F5GWI9;F5GXZ7;F5GZ97;Q9Y3C0	24.0855	22.8888	23.525	23.8225	23.5496	23.0287		-0.262993	0.897892		0.660846	0.843832		-0.496352	0.506323			0.681316		23.867	24.2406	24.1488	23.4225	23.8858	21.358	23.6971	23.3376	23.5404	24.8205	23.4264	23.5754	23.4676	24.0275	23.4923	23.2678	23.4108	23.3511	22.7505	22.9376	23.0754
CCDC58	Coiled-coil domain-containing protein 58	C9JQ41;H7C525;Q4VC31	24.3859	24.8149	25.4352	24.4154	24.8844	23.9113		0.0295308	0.997256		0.0694364	0.989688		-1.52393	0.525301			0.886654		25.3135	24.7746	23.0696	23.8146	25.4394	25.1908	25.7821	25.3943	25.1293	25.0484	25.5522	23.464	23.5971	25.6237	22.9631	25.4769	25.4738	23.2064	25.2785	24.0409	23.1193
CCDC6	Coiled-coil domain-containing protein 6	Q16204	26.878	27.0598	27.1493	27.1076	27.0606	27.0833		0.229656	0.766007		0.000809987	0.999004		-0.0660392	0.90648			0.847577		26.8504	26.7645	27.019	26.9539	27.2714	26.9539	27.1312	27.2354	27.0813	27.1312	27.1507	27.217	26.9316	27.1795	26.965	26.9089	27.189	27.3745	27.1312	26.8623	26.965
CCDC88A	Girdin	Q3V6T2-2;Q3V6T2;B7ZM78;Q3V6T2-4;Q3V6T2-3	24.209	23.6441	24.5911	24.255	23.8683	24.0797		0.0459572	0.979159		0.224225	0.956337		-0.511459	0.821781			0.914489		23.8764	24.141	24.6096	24.6971	23.8093	22.4258	24.6811	24.5285	24.5638	24.9271	24.2891	23.8191	23.9847	22.9265	24.4862	24.4923	23.5682	24.4676	22.6741	24.5285	24.6486
CCDC91	Coiled-coil domain-containing protein 91	Q7Z6B0-3;Q7Z6B0-2;Q7Z6B0;F5H1Z3;F5H7G3	24.7995	24.8916	24.9817	24.7348	25.0995	24.8285		-0.0647308	0.957218		0.207936	0.839325		-0.153162	0.905718			0.918322		25.0359	24.3101	25.0526	25.2096	24.7895	24.6757	24.9361	24.391	25.6181	24.9933	24.7389	24.6431	24.5638	25.3578	24.9628	24.8717	25.2058	24.5522	24.989	24.8191	24.9539
CCDC93	Coiled-coil domain-containing protein 93	F8W9X7;Q567U6	25.2182	24.8023	24.8421	25.2474	25.4851	25.3518		0.0291448	0.985833		0.682794	0.759127		0.509625	0.675855			0.829676		25.5195	24.9406	25.1946	23.8504	25.3066	25.2499	25.1871	24.1372	25.2021	24.5801	25.7389	25.417	25.2535	25.3239	25.7312	25.5075	25.3778	25.2571	25.3101	25.391	25.4488
CCL5	C-C motif chemokine 5;RANTES(3-68);RANTES(4-68)	P13501	29.4608	29.1058	28.9347	29.1701	29.0342	28.8058		-0.29076	0.782679		-0.0715609	0.955358		-0.128967	0.785077			0.367405		29.5844	29.509	29.2891	29.3971	28.9146	29.0057	29.0864	28.8234	28.8945	29.2077	28.9344	29.2825	29.2557	29.4919	28.9117	28.7357	28.9977	28.8712	28.9231	28.5754	28.8534
CCND3	G1/S-specific cyclin-D3	P30281;E9PAS4;Q5T8J1;P30281-2	23.2664	23.7097	23.2841	23.5287	23.6823	22.9937		0.2623	0.843965		-0.0273841	0.967978		-0.290371	0.937952			0.910123		23.2861	23.6209	22.8922	23.7796	23.6209	23.7286	22.3062	23.8385	23.7077	23.4447	23.7389	23.7077	23.2234	23.6431	23.4676	23.8648	23.7537	24.1946	22.1323	22.0726	23.5754
CCNY	Cyclin-Y	B7Z8E4;Q8ND76-3;Q8ND76-2;Q8ND76	24.0901	23.4879	23.8429	24.1291	23.8057	23.5223		0.0389781	0.979194		0.317804	0.895392		-0.320569	0.939878			0.955197		23.9584	24.3101	24.002	24.317	23.0115	23.1352	24.1488	24.4862	22.8937	24.0222	23.8034	23.8191	24.8717	23.9495	22.7551	24.3645	24.1537	24.0359	23.8576	21.6913	24.5045
CCS	Copper chaperone for superoxide dismutase;Superoxide dismutase [Cu-Zn]	O14618;E9PP76	28.9672	28.9299	28.8585	28.9156	28.8452	28.9045		-0.051528	0.97607		-0.0846818	0.899038		0.0459243	0.956139			1		28.965	28.6629	29.2736	28.9259	29.0164	28.8474	28.7927	28.906	28.877	28.8203	29.461	29.0531	28.3282	29.0762	29.0375	28.6527	28.6146	28.4668	29.2077	29.0634	28.8799
CCT2	T-complex protein 1 subunit beta	P78371;P78371-2;F5GWF6;F8VQ14	31.3027	31.313	31.4406	31.3408	31.3287	31.3473		0.0381136	0.910781		0.01565	0.987308		-0.093232	0.824194			0.937594		31.2422	31.3357	31.3303	31.2814	31.2193	31.4384	31.5203	31.3982	31.4032	31.362	31.4678	31.3142	31.2193	31.4775	31.1724	31.4629	31.2019	31.1901	31.4284	31.2365	31.5343
CCT3	T-complex protein 1 subunit gamma	P49368;B4DUR8;P49368-2	31.2058	31.1916	31.21	31.1892	31.3413	31.2751		-0.016609	0.963885		0.149666	0.799378		0.0650347	0.948709			0.936001		31.2814	31.2308	31.1053	31.1422	31.0864	31.3463	31.3033	31.1724	31.1544	31.1361	31.2703	31.2703	31.08	31.3879	31.325	31.4919	31.1604	31.0737	31.4234	30.9746	31.6285
CCT4	T-complex protein 1 subunit delta	P50991;B7Z9L0;F5H5W3;B7Z2F4	31.2261	31.2939	31.316	31.2813	31.4149	31.4131		0.0552444	0.913931		0.121003	0.792837		0.0970461	0.752282			0.750563		31.2365	31.2814	31.1604	31.3303	31.1842	31.3672	31.4483	31.2019	31.2979	31.1664	31.5062	31.2924	31.1604	31.4629	31.4532	31.5014	31.2422	31.4532	31.4823	31.3033	31.4134
CCT5	T-complex protein 1 subunit epsilon	P48643;E7EWW2;E7ENZ3;B7ZAR1;E9PCA1;B4DYD8	31.1529	31.0635	31.1299	31.1294	31.1354	31.1944		-0.0235384	0.961857		0.0719302	0.905755		0.0645297	0.895913			0.986021		31.1544	31.2308	31.0737	31.1177	30.8081	31.2647	31.1544	31.1177	31.1177	31.0737	31.2647	31.1842	30.995	31.1239	31.1115	31.325	30.9814	31.0414	31.4234	31.015	31.2979
CCT6A	T-complex protein 1 subunit zeta	P40227;B4DPJ8;A6NCD2	31.43	31.5185	31.4563	31.4686	31.5606	31.5704		0.0386678	0.93192		0.0420852	0.949489		0.114086	0.851721			0.936156		31.4083	31.4532	31.4284	31.4919	31.4483	31.6154	31.5573	31.4032	31.4083	31.3672	31.6798	31.4919	31.3357	31.6714	31.5156	31.7413	31.3142	31.7653	31.6839	31.2478	31.5844
CCT7	T-complex protein 1 subunit eta	Q99832;B8ZZC9;F5GZK5;Q99832-4;B7Z1C9;Q99832-2	30.7234	30.7329	30.7493	30.7871	30.8874	30.8964		0.0636565	0.83511		0.154552	0.824694		0.147174	0.603319			0.753623		30.7292	30.6798	30.7613	30.5203	30.7453	30.933	30.7129	30.8385	30.6964	30.8534	30.8309	30.7927	30.6714	31.0017	30.8756	30.9677	30.7047	30.8309	31.0414	30.8234	30.8901
CCT8	T-complex protein 1 subunit theta	B4DEM7;P50990;G5E9B2;B4DQH4	31.5684	31.5584	31.5873	31.566	31.5916	31.5857		-0.0024519	0.991882		0.0332187	0.907543		-0.00158199	0.998075			1		31.5709	31.6329	31.5014	31.5573	31.4678	31.6501	31.5844	31.4727	31.7047	31.5481	31.6198	31.525	31.5709	31.5014	31.5435	31.6629	31.6586	31.4678	31.5296	31.7211	31.6242
CD109	CD109 antigen	Q6YHK3;Q6YHK3-4;Q6YHK3-2;Q6YHK3-3	28.4565	28.591	28.6663	28.5629	28.3603	28.3355		0.106319	0.951424		-0.23069	0.87225		-0.33075	0.807569			0.965557		27.965	28.2759	29.1288	28.0914	28.4234	29.258	28.1459	28.6998	29.1532	28.4473	28.7031	28.6898	28.4113	28.2308	28.3578	28.6355	28.217	28.0296	28.4938	27.9923	28.8264
CD151	Tetraspanin;CD151 antigen	E9PL82;E9PRJ3;E9PMR4;P48509	22.1829	25.4127	23.9845	25.2456	24.891	24.9376		3.0627	0.667786		-0.521665	0.966878		0.953094	0.877012			0.814089		21.8288	22.0345	22.6854	27.611	26.976	21.651	26.228	22.7591	22.9665	26.0894	24.6703	24.6325	25.5902	23.574	26.228	22.9601	26.8019	26.0995	23.02	26.8623	23.7687
CD226	CD226 antigen	Q15762	27.895	27.9503	28.276	28.1866	27.8638	27.9694		0.291529	0.822999		-0.0865595	0.963393		-0.306565	0.659466			0.840309		27.7581	27.8973	28.0296	27.7195	27.976	28.1556	28.0243	28.2759	28.5278	28.1937	27.9705	28.003	28.579	28.258	28.2803	27.5014	27.4154	27.7708	28.2262	27.8564	28.0243
CD2AP	CD2-associated protein	Q9Y5K6	28.5398	28.5225	28.6831	28.5621	28.6064	28.595		0.0223284	0.958455		0.0838993	0.837341		-0.088124	0.841072			0.914124		28.5682	28.3951	28.6561	28.4938	28.4591	28.6146	28.6931	28.6798	28.6764	28.6424	28.5898	28.5969	28.4194	28.5499	28.6075	28.7895	28.4785	28.4512	28.8234	28.4629	28.6424
CD36	Platelet glycoprotein 4	E7EU05;P16671;D9IX66;E9PLT1;D9IX68	31.416	31.6886	31.6849	31.0518	31.0974	31.1627		-0.364147	0.751526		-0.59119	0.311082		-0.522209	0.478683			0.0694592		31.4032	31.5799	31.2647	31.781	31.5435	31.7413	31.7088	31.8829	31.4629	31.099	30.8004	31.0544	31.2535	31.3088	31.08	31.0608	30.94	31.0414	31.4483	30.9188	31.2422
CD40LG	CD40 ligand;CD40 ligand, membrane form;CD40 ligand, soluble form	P29965;Q3L8U2	24.9612	25.0941	24.053	24.4584	24.239	24.0435		-0.502804	0.87359		-0.855144	0.632177		-0.00950082	1			0.910008		25.0894	24.7129	25.0813	25.019	25.3545	24.9089	22.104	25.1833	24.8717	24.9134	24.7077	23.0142	25.1984	24.895	23.81	23.8468	24.4041	23.2546	25.6911	24.5631	22.6653
CD47	Leukocyte surface antigen CD47	Q08722-2;Q08722-3;Q08722-4;Q08722	26.7951	26.1133	24.8457	23.9046	23.8048	23.9709		-2.89045	0.803611		-2.30842	0.762728		-0.874752	0.894843			0.790455		26.4846	26.4692	27.4314	26.9202	27.0608	24.3587	22.8315	27.3578	24.3477	23.4789	22.6431	21.8303	27.6663	23.3978	21.7694	23.5103	26.5419	22.4983	23.9565	26.4661	22.9628
CD69	Early activation antigen CD69	Q07108;B4E009	24.3228	25.051	24.6625	24.2932	24.3421	24.3353		-0.029531	0.993794		-0.708902	0.532129		-0.32715	0.759797			0.890957		23.0814	25.0484	24.8385	24.8481	25.1293	25.1757	24.6209	24.9495	24.417	24.4105	23.1999	24.6264	24.9361	24.2821	24.1946	24.0824	24.8093	24.6431	24.0288	24.6918	23.9776
CD84	SLAM family member 5	Q9UIB8-3;Q9UIB8-2;Q9UIB8;Q9UIB8-6;Q9UIB8-5;Q9UIB8-4	28.4836	28.3831	28.5195	28.2106	27.5339	27.9944		-0.273001	0.82579		-0.849183	0.34953		-0.525069	0.624001			0.132534		28.1747	28.5862	28.6898	28.1604	28.5898	28.3992	28.0813	28.9089	28.5682	28.3869	27.976	28.2625	28.217	27.9146	27.5826	27.3494	27.2891	27.7958	27.9869	27.7958	28.3992
CD9	Tetraspanin;CD9 antigen	B4DPP0;A6NNI4;G8JLH6;P21926	31.2421	31.2002	31.4853	30.886	30.8572	31.0305		-0.356076	0.851607		-0.342942	0.77993		-0.454845	0.501122			0.739698		31.1239	31.6415	30.9609	30.9882	31.0414	31.5709	31.5618	31.3879	31.5062	30.611	30.7613	30.4919	31.6798	31.0217	30.9259	30.4334	31.0479	30.6881	31.0608	31.0479	31.325
CD99	CD99 antigen	A6NIW1;P14209;A8MQT7;H7C2F2;P14209-2	25.9514	25.1654	24.8428	25.6412	25.5499	25.2361		-0.310214	0.90785		0.384509	0.870138		0.393342	0.819321			0.838342		25.4614	26.2002	26.1927	25.4551	25.8166	24.2244	25.239	24.5869	24.7024	25.141	24.9803	25.654	26.7895	25.6264	25.9847	24.6865	25.902	26.1833	24.8904	24.6649	25.2058
CDC37	Hsp90 co-chaperone Cdc37;Hsp90 co-chaperone Cdc37, N-terminally processed	Q16543	29.7162	29.8099	29.7812	29.6958	29.8546	29.81		-0.0204244	0.975426		0.044668	0.963694		0.0288703	0.957764			0.952065		29.8858	29.7786	29.4842	29.837	29.7771	29.8157	29.8564	29.5754	29.9117	29.6981	29.6303	29.8579	29.5969	29.5934	29.6663	30.1239	30.0349	29.7341	29.7146	30.0737	29.7178
CDC42	Cell division control protein 42 homolog	P60953;E7ETU3;P60953-1;Q5JYX0	29.552	29.45	29.7309	29.5215	29.4007	29.3027		-0.0304888	0.976889		-0.0492689	0.951825		-0.428241	0.444865			0.710211		29.3325	29.6337	29.6898	29.4234	29.5052	29.4214	29.6424	29.8623	29.6881	29.5481	29.3066	29.3196	29.9117	29.2399	29.7533	29.3951	29.2147	29.1164	29.2891	29.579	29.2262
CDC42BPB	Serine/threonine-protein kinase MRCK beta	Q9Y5S2	29.4804	29.5093	29.6213	29.6231	29.6927	29.6513		0.142727	0.743247		0.183403	0.779755		0.0300131	0.898541			0.652898		29.4413	29.5664	29.4334	29.4214	29.4453	29.6612	29.5536	29.668	29.6424	29.6612	29.6931	29.5573	29.5808	29.8726	29.6022	29.7927	29.5033	29.6595	29.7341	29.5371	29.6747
CDK16	Cyclin-dependent kinase 16	F5H203;B7Z8T0;Q00536;E5RGN0	23.6672	23.6873	22.7863	23.6596	23.7315	24.5926		-0.0076429	0.997747		0.0441531	0.99351		1.80633	0.424475			0.857468		23.8973	23.7111	23.3931	25.3811	23.1259	22.5548	21.8673	23.3645	23.1271	22.9317	25.4105	21.899	24.397	22.831	23.3416	25.0401	23.7131	25.0148	25.0317	24.5404	23.7837
CDK17	Cyclin-dependent kinase 17	F5H6Z0;Q00537-2;Q00537	24.7501	24.0666	24.2354	23.9168	24.2223	22.9278		-0.833219	0.766641		0.155623	0.833157		-1.30761	0.517605			0.179364		24.6209	24.8904	24.7389	23.9672	24.1565	24.0762	23.7286	24.3511	24.6264	24.1332	22.9937	24.4551	24.0854	23.8821	24.4676	24.4298	24.1095	22.4626	23.8045	23.186	22.2581
CDK2	Cyclin-dependent kinase 2	G3V5T9;P24941;E7ESI2;P24941-2	25.5183	25.6114	25.6699	25.4985	25.8133	25.6469		-0.0197846	0.988459		0.201919	0.841447		-0.0230021	0.961024			0.912792		25.8433	25.0935	25.6181	25.4394	25.5045	25.8904	25.4583	25.7895	25.7619	25.1565	25.5638	25.9428	25.3307	25.5045	26.143	25.6811	25.9248	25.5315	25.8457	25.5841	25.6264
CDK5	Cyclin-dependent-like kinase 5	Q00535;Q00535-2	27.3379	26.9717	26.995	27.1114	27.1451	27.162		-0.226465	0.812484		0.173442	0.852569		0.16704	0.802118			0.874877		27.1312	27.2714	27.611	26.9428	26.7645	27.2077	26.7645	27.2445	26.976	26.9869	27.3066	26.9539	27.1984	26.9977	26.9316	27.611	27.0401	27.1115	27.3153	26.8973	27.3239
CDK5RAP3	CDK5 regulatory subunit-associated protein 3	Q96JB5;F5H3I5;Q96JB5-2;Q96JB5-3	26.414	26.5564	26.4852	26.4616	26.6357	26.7183		0.0476055	0.942889		0.0792699	0.896689		0.233091	0.51689			0.67093		26.4692	26.4488	26.3239	26.6595	26.3778	26.632	26.4202	26.4457	26.5898	26.574	26.6865	26.228	26.3578	26.5898	26.8623	26.3778	26.7129	26.7518	26.6998	26.5595	26.8623
CDKN2D	Cyclin-dependent kinase 4 inhibitor D	P55273	29.2623	28.8122	28.6231	28.7692	28.9355	28.6039		-0.493034	0.631966		0.123394	0.836836		-0.019273	0.982635			0.26133		29.2847	29.3131	29.189	28.5389	28.8445	29.0531	28.3367	29.1214	28.4113	28.7549	28.8682	28.5826	28.8712	28.8829	28.8916	28.9567	29.0111	28.7325	28.5573	28.4194	28.7064
CDV3	Protein CDV3 homolog	Q9UKY7;Q9UKY7-2	28.8969	29.0091	29.0873	29.1203	28.663	28.8673		0.223361	0.793222		-0.346129	0.699532		-0.219977	0.637439			0.324473		29.0839	28.805	28.8019	28.906	29.0427	29.0788	29.203	28.9622	29.0965	29.0914	29.2847	29.1263	28.9787	28.7292	28.5573	28.9787	28.3869	28.6764	28.8355	29.0686	28.8887
CELF2	CUGBP Elav-like family member 2	Q5VZZ6;E9PC62;O95319-5;O95319-2;O95319;O95319-4;O95319-3	26.3499	26.5086	26.6654	26.6537	26.6292	26.6165		0.3038	0.75814		0.120646	0.905604		-0.0488741	0.958856			0.914211		26.5463	26.1507	26.3528	26.3135	26.4862	26.726	26.604	26.8385	26.5536	26.5754	26.8264	26.7518	26.4614	26.3828	26.6865	27.0914	26.3562	26.3084	26.9428	26.329	26.8858
CEP131	Centrosomal protein of 131 kDa	Q9UPN4-2;Q9UPN4;I3L2J8;Q9UPN4-3;I3L2X7	24.3112	24.7397	25.3689	25.2183	24.7327	25.1653		0.907045	0.845245		-0.00697962	0.999301		-0.203647	0.798168			0.93478		25.1095	25.452	22.3722	25.5195	25.7441	22.9554	25.4298	25.5754	25.1015	25.3031	25.1332	25.2996	25.1371	22.9914	25.8312	25.141	24.9672	25.3811	25.4105	24.9977	24.8717
CEP170	Centrosomal protein of 170 kDa	Q5SW79;Q5SW79-3;Q5SW79-2;H0Y2V6	25.6276	25.8065	25.5291	25.7163	25.7982	25.855		0.0886224	0.960208		-0.00827154	0.992374		0.325908	0.351967			0.91621		26.0127	25.5225	25.3477	25.9248	25.705	25.7895	25.4008	25.6403	25.5463	26.3084	25.7846	25.3811	25.391	26.0608	25.8741	25.5983	25.6595	25.824	25.8927	25.9517	25.7518
CFB	Complement factor B;Complement factor B Ba fragment;Complement factor B Bb fragment	B4E1Z4;E7EVA3;P00751;E7ETN3;B0UXW4;H7C5H1;P00751-2	27.6648	27.6506	27.5996	27.5969	27.5	27.6324		-0.0679015	0.924451		-0.150625	0.809476		0.032843	0.966363			0.978117		27.632	27.524	27.8385	27.4234	27.7895	27.7389	27.2535	27.8858	27.6595	27.7518	27.4785	27.3494	27.8081	27.524	27.3578	27.632	27.4862	27.5969	27.3828	27.6527	27.8973
CFH	Complement factor H	P08603;P08603-2	28.2115	28.0541	28.12	28.5502	29.0732	29.1766		0.338726	0.762809		1.01909	0.382148		1.05657	0.254686		+	0.0197462		27.9977	28.17	28.4668	27.8081	28.189	28.1652	27.7645	28.3787	28.217	28.5463	28.3951	28.4668	28.7927	29.4862	29.3217	28.6798	28.805	29.2077	28.9117	29.1556	29.4314
CFHR1	Complement factor H-related protein 1	B1AKG0;Q03591	23.5839	23.9304	22.8972	23.1427	23.7702	24.2135		-0.441231	0.889635		-0.160191	0.968255		1.3163	0.534577			0.775539		23.7895	23.6273	23.3349	24.2779	23.5285	23.9847	21.7465	23.4744	23.4706	22.0186	23.3645	24.4105	22.7771	23.2298	24.9271	22.6922	24.2317	23.8383	24.5754	24.2961	24.144
CFHR2	Complement factor H-related protein 2	P36980-2;P36980	23.1285	23.2148	23.1005	23.5414	23.1823	22.9024		0.412912	0.871316		-0.0325259	0.990035		-0.198113	0.900537			0.91511		22.5935	22.944	23.8481	23.3345	23.4298	22.8801	22.8624	23.1855	23.2535	22.8579	23.1943	23.8385	24.2751	22.5746	23.5165	23.4446	23.1933	22.3507	22.5675	22.8894	23.8019
CFL1	Cofilin-1	P23528;E9PP50;G3V1A4;E9PK25;E9PQB7;E9PS23;E9PLJ3	34.4309	34.5166	34.417	34.3527	34.314	34.2835		-0.0781568	0.89761		-0.202565	0.79804		-0.133504	0.744019			0.868322		34.4458	34.2828	34.5641	34.3828	34.4883	34.6787	34.4146	34.3303	34.5062	34.3502	34.5238	34.4146	34.1223	34.4146	34.0753	34.547	34.2193	34.0512	34.3763	34.3303	34.3763
CFL2	Cofilin-2	Q9Y281;G3V5P4	23.5896	23.9311	24.28	23.2019	23.2316	23.5476		-0.387758	0.880047		-0.699504	0.827593		-0.732354	0.59265			0.787234		24.1095	23.8288	22.8305	23.5674	24.3778	23.8481	24.1565	24.2096	24.4738	23.5594	22.7429	22.5916	23.9134	21.9276	23.8576	23.9584	23.1829	23.2886	24.0935	23.9134	22.895
CHCHD3	MICOS complex subunit MIC19	C9JRZ6;Q9NX63;F8WAR4;G3V1K1	25.4895	26.0053	26.0462	26.1363	25.7459	25.9725		0.64678	0.599272		-0.259342	0.809591		-0.0736965	0.946111			0.495529		25.7746	25.4298	25.2643	26.2535	25.7518	26.0105	25.8858	25.8457	26.4073	25.9517	26.1174	26.2426	26.2335	26.1234	25.6153	25.4984	25.7466	26.3612	26.0275	25.6971	25.8044
CHID1	Chitinase domain-containing protein 1	Q9BWS9-3;Q9BWS9;Q9BWS9-2;E9PI70;E9PIP0;E9PRL3;E9PPH0;E9PPA0	26.8113	26.5796	26.4489	26.7913	26.9094	26.753		-0.0200154	0.986102		0.329782	0.580563		0.3041	0.589348			0.680571		26.4583	27.1015	26.8741	26.5754	26.5595	26.604	26.3256	26.5898	26.4314	26.8623	26.8385	26.3728	27.0914	26.9869	26.8264	26.7129	27.1115	26.9977	26.5898	26.5624	26.8623
CHKB	Choline/ethanolamine kinase	Q9Y259	27.0423	27.0365	27.1981	27.1477	27.1142	27.233		0.105378	0.817106		0.0777413	0.842696		0.0348636	0.964459			0.914336		27.0505	26.965	27.1115	27.0608	27.0296	27.019	27.0608	27.3828	27.1507	27.217	27.2625	27.0505	27.0608	27.0505	27.3066	27.0084	27.0914	27.0914	27.611	26.9316	27.2979
CHMP1A	Charged multivesicular body protein 1a	Q9HD42;F8VUA2;F8VVT7;F5H875	25.8673	26.3865	26.6691	26.3841	26.555	26.229		0.516753	0.835985		0.168506	0.865358		-0.440143	0.773235			0.836338		24.9628	25.9933	26.6458	26.4831	26.7518	25.9248	26.9202	26.604	26.4831	26.6181	26.1604	26.4846	26.2732	26.5105	26.5653	26.3926	26.7518	26.4282	25.5014	26.9316	26.0547
CHMP1B	Charged multivesicular body protein 1b	Q7LBR1	26.7721	25.9068	26.2356	26.6299	25.9274	25.3266		-0.142187	0.91245		0.0206342	0.998093		-0.908943	0.739994			0.757968		26.518	26.518	27.2803	26.1719	25.9933	25.5551	25.9869	26.4378	26.2821	26.4923	26.9089	26.4057	26.7129	26.1135	26.4473	24.0275	27.1214	25.7619	24.5285	26.7129	24.3031
CHMP2A	Charged multivesicular body protein 2a	O43633	25.7736	25.7253	25.574	25.6539	24.6935	25.2214		-0.119651	0.89998		-1.03176	0.838079		-0.352634	0.898781			0.910362		25.673	25.8044	25.8433	25.6153	25.9202	25.6403	25.1253	25.6971	25.8997	25.8288	25.9111	25.6811	25.1946	25.7619	25.726	25.3679	21.9183	25.3645	26.0608	23.6632	25.797
CHMP2B	Charged multivesicular body protein 2b	C9J0A7;Q9UQN3;B4DJG8	22.5692	23.6839	23.0422	23.4528	23.6625	23.871		0.883647	0.781866		-0.0214488	0.993619		0.828796	0.697994			0.613233		21.6788	22.7927	23.236	23.8576	23.4569	23.7373	23.4067	22.0016	23.7182	23.2485	23.4541	23.2895	23.8191	23.1389	23.6431	23.2527	24.6153	24.1332	23.9689	23.1946	24.1872
CHMP3	Charged multivesicular body protein 3	Q9Y3E7-2;Q9Y3E7;Q9Y3E7-3;Q9Y3E7-4	25.1596	24.7332	24.3772	25.2651	25.3055	25.3524		0.105538	0.955019		0.5723	0.734596		0.97525	0.666604			0.698164		24.4551	25.2821	25.7415	25.2058	24.0667	24.9271	23.0949	25.065	24.9716	25.2607	25.4073	25.275	25.1174	25.4138	25.1095	25.3342	25.3645	25.0732	25.4769	25.3612	25.4984
CHMP4A	Charged multivesicular body protein 4a	H0YI46;Q9BY43;Q14D22;E9PQI5;E9PQ80;E9PSI1	26.537	26.5472	26.4775	26.1265	26.1038	26.1232		-0.410434	0.79095		-0.443384	0.668794		-0.354396	0.258772			0.372213		26.5551	26.5696	26.4862	26.604	26.4057	26.632	26.533	26.4089	26.4908	26.3511	25.6784	26.4661	26.0105	25.673	26.329	26.3239	26.0894	25.9933	26.1371	26.1507	26.2114
CHMP4B	Charged multivesicular body protein 4b	Q9H444	26.4958	26.693	26.6063	26.7193	26.4773	26.3537		0.223509	0.817554		-0.215712	0.843761		-0.252571	0.801643			0.877865		26.5653	26.3325	26.5898	26.5898	26.6998	26.7895	26.7645	26.3679	26.6865	26.8623	26.509	26.8741	26.632	26.1075	26.8973	26.1527	26.7518	26.425	26.1449	26.8623	25.9825
CHMP5	Charged multivesicular body protein 5	Q9NZZ3;Q9NZZ3-2	25.0345	23.8804	24.3067	23.8836	24.5571	23.6607		-1.1509	0.834264		0.676677	0.852126		-0.645974	0.88494			0.91802		25.5898	24.7695	24.7441	22.4016	25.2058	24.0337	22.4386	25.3443	25.1371	23.6118	25.2891	22.7128	23.9205	25.1946	24.7182	23.3527	24.9628	22.2926	23.895	24.8811	23.5741
CHMP6	Charged multivesicular body protein 6	Q96FZ7;I3L4A1;I3L3E4;I3L4G8	24.9861	24.9295	24.8762	24.9767	24.5512	23.9054		-0.0094018	0.996662		-0.378349	0.639798		-0.970837	0.589301			0.386143		24.867	24.5869	25.5045	24.8997	24.9847	24.9043	25.0105	25.0484	24.5696	25.2856	24.2934	25.1371	25.1908	24.2005	24.632	24.7796	24.5926	23.4324	23.7568	24.9743	23.4579
CHORDC1	Cysteine and histidine-rich domain-containing protein 1	Q9UHD1;Q9UHD1-2;E9PPQ5	27.314	27.0543	27.1968	27.2631	27.0963	27.2643		-0.0509467	0.914505		0.0419464	0.907234		0.0674103	0.949871			0.838285		27.2445	27.3066	27.391	27.0296	26.9539	27.1795	27.141	27.1604	27.2891	27.17	27.2262	27.4862	27.17	27.1507	26.9428	27.1312	27.1604	27.1604	26.9977	27.7195	27.1795
CHP1	Calcineurin B homologous protein 1	Q99653;H0YKE7;F5GX29;H0YNG9;H0YLY7	26.0367	25.9661	26.4361	26.142	26.166	26.3553		0.105327	0.896332		0.199866	0.843537		-0.0807354	0.884918			0.588592		26.1115	26.3014	25.6971	26.0526	26.189	25.6568	26.6181	26.4676	26.2225	26.1719	26.2354	26.0275	26.1332	26.4567	25.9495	26.0935	26.1642	26.1661	26.4441	26.3066	26.5045
CHUK	Inhibitor of nuclear factor kappa-B kinase subunit alpha	O15111	26.103	26.0988	26.0003	25.9725	25.9286	26.1236		-0.130514	0.910567		-0.170253	0.824931		0.123315	0.78795			0.934205		25.6784	26.515	26.1154	25.9202	26.0732	26.3031	26.1776	26.0691	25.7543	25.8044	26.2426	25.9225	25.9202	26.1194	25.7129	26.0127	25.8694	26.1293	26.0854	26.1234	26.1565
CIAPIN1	Anamorsin	Q6FI81-3;Q6FI81;H3BV90;H3BT65	25.951	26.4413	26.1994	26.4224	25.9786	26.1316		0.471499	0.748546		-0.462655	0.293372		-0.0678021	0.948264			0.45229		26.1449	25.8433	25.8647	26.3443	26.4041	26.5754	26.2426	25.9225	26.433	26.7771	26.5711	26.2262	26.1154	26.1115	25.9293	25.8504	26.0233	25.9043	26.1681	26.509	25.945
CIRBP	Cold-inducible RNA-binding protein	Q14011;B4E2X2	23.8298	25.5004	24.7005	25.285	24.9701	25.0426		1.45523	0.81511		-0.530282	0.635846		0.342149	0.887099			0.799875		24.8093	21.452	25.228	25.2678	25.7846	25.4488	25.1565	23.7131	25.2317	25.2926	25.2244	25.5255	25.0975	25.2643	24.7024	24.8044	25.1095	25.0894	24.1943	25.5255	25.3612
CKAP5	Cytoskeleton-associated protein 5	Q14008-2;Q14008;Q14008-3	30.9948	30.9255	30.9488	30.9506	30.9484	31.0018		-0.044143	0.897466		0.0229514	0.957999		0.0529291	0.797604			0.951354		30.947	31.1115	30.9259	30.94	30.8081	31.0283	30.9746	30.8973	30.9746	30.8829	31.0608	30.9259	30.933	31.0479	30.8309	30.9609	30.9539	31.0217	31.0017	30.8973	31.0864
CLASP1	CLIP-associating protein 1	E7EUA5;F8WA11;Q7Z460-2;B7ZLX3;F5GWS0;Q7Z460-3;Q7Z460;F5H2E2;F5GWM7	27.2487	26.9175	26.9286	27.1955	27.1687	26.9305		-0.053164	0.946732		0.251183	0.811535		0.00190767	0.999043			0.672415		26.9428	27.3325	27.4707	26.8741	27.0401	26.8385	26.9316	27.0401	26.8142	27.0813	27.2891	27.1312	27.2803	27.509	26.8019	27.0401	27.3239	27.0813	26.976	26.6458	27.019
CLASP2	CLIP-associating protein 2	E7ERI8;E7EW49;F5H604;E3W994;O75122;E9PBA6;F5H3X0	25.4418	25.5594	24.2711	24.2816	24.4853	24.6177		-1.16015	0.860066		-1.07419	0.756886		0.346581	0.95573			0.939177		25.3307	25.5841	25.4105	25.4831	25.6757	25.5195	25.5926	25.433	21.7876	25.4008	25.4984	25.1095	21.1179	23.9726	24.8288	23.4033	25.7364	25.7156	25.5725	25.1095	22.0731
CLEC11A	C-type lectin domain family 11 member A	Q9Y240;C9JXV2	25.1005	24.9598	24.6604	24.7069	24.641	24.0119		-0.393596	0.800973		-0.318717	0.810749		-0.648462	0.670969			0.371539		25.2096	25.0813	25.0105	25.4008	24.9089	24.5696	24.7746	25.0813	24.1253	24.1946	24.9672	24.8811	24.7846	24.3578	24.7796	24.9043	24.5225	24.2096	24.1095	24.417	23.3117
CLEC16A	Protein CLEC16A	F5H4D0;Q2KHT3-2;Q2KHT3	23.7639	23.7586	23.6448	23.7624	23.7936	23.6415		-0.00145658	0.997422		0.0350362	0.987381		-0.00332006	0.999567			0.999909		23.7182	23.48	24.0935	23.5404	23.391	24.3443	23.9134	23.5045	23.5165	23.8764	23.9134	23.7077	23.5522	23.9847	23.5754	23.8858	23.7286	23.8764	23.867	23.0132	23.8093
CLEC1B	C-type lectin domain family 1 member B	Q9P126-2;Q9P126;H7BYT8	27.7726	27.8045	27.8938	27.5058	27.4083	27.0687		-0.266878	0.892491		-0.396242	0.75347		-0.825093	0.453661			0.593661		27.4551	28.0243	27.8385	27.6931	28.1164	27.604	27.6458	28.203	27.8324	27.5969	26.6458	27.8264	27.9539	27.2445	27.524	27.0813	27.7833	27.524	26.6865	27.1214	26.9428
CLIC1	Chloride intracellular channel protein 1	O00299	34.3551	34.4455	34.2586	34.3394	34.4203	34.4101		-0.0156536	0.970848		-0.0252167	0.973728		0.151434	0.668934			0.884974		34.4083	34.402	34.2549	34.2619	34.4823	34.5922	34.3033	34.1223	34.3502	34.2828	34.5002	34.3698	34.2048	34.5412	34.2828	34.547	34.3101	34.3502	34.3956	34.3303	34.5641
CLIC4	Chloride intracellular channel protein 4	Q9Y696;F5H1F8	31.162	31.0983	31.2323	31.1038	31.141	31.1267		-0.0581326	0.889399		0.0427003	0.920615		-0.105601	0.707706			0.915385		31.1177	31.2019	31.1664	30.9677	31.0737	31.2535	31.2647	31.1842	31.2478	30.9539	31.2703	31.0673	31.1239	31.0017	31.2422	31.1901	31.13	31.0217	31.1724	31.0479	31.2647
CLINT1	Clathrin interactor 1	Q14677-2;Q14677-3	29.088	29.0106	29.1251	29.2522	29.1043	29.225		0.164192	0.816622		0.0936778	0.836363		0.0998878	0.83355			0.80901		29.0965	29.2054	28.9622	28.965	29.0111	29.0557	29.2285	28.9841	29.1628	29.5014	29.17	29.2285	29.109	28.8973	29.0889	29.3044	29.1263	29.1866	29.4214	29.2625	29.0296
CLIP1	CAP-Gly domain-containing linker protein 1	P30622-2;P30622-1;P30622;F5H0P3;F5H0N7	28.8297	28.9253	28.8989	28.7805	28.8028	28.8777		-0.0492549	0.958708		-0.122415	0.797769		-0.0212379	0.945693			0.933078		28.9089	28.7389	28.8415	28.906	28.8534	29.0164	28.8887	28.8653	28.9428	28.9677	28.8973	28.8741	28.3828	28.6998	28.7129	28.9814	28.8173	28.7453	28.8799	29.0084	28.877
CLIP2	CAP-Gly domain-containing linker protein 2	F5GYW3;Q9UDT6-2;Q9UDT6	28.4006	28.4718	28.6691	28.4693	28.4726	28.583		0.068723	0.916917		0.000821908	0.999653		-0.0860842	0.949893			0.941855		28.4938	28.5573	28.1507	28.4433	28.3787	28.5934	28.8741	28.6355	28.4976	28.4512	28.2803	28.6181	28.5278	28.0401	28.7195	28.4113	28.7195	28.8112	28.249	29.0004	28.2714
CLSTN1	Calsyntenin-1;Soluble Alc-alpha;CTF1-alpha	B4E3Q1;O94985-2;O94985;Q5SR54	24.5195	24.8635	24.0638	23.7888	24.0666	23.3695		-0.730704	0.890852		-0.796905	0.82418		-0.694293	0.864997			0.914503		25.3511	25.5195	22.6878	23.691	25.8142	25.0854	24.6376	22.2646	25.2891	24.0416	22.7804	23.2039	25.1293	23.7471	23.2915	24.6757	24.5522	23.8704	24.2065	23.0148	22.3861
CLTA	Clathrin light chain A	P09496-2;P09496-4;P09496-3;P09496;F8WF69;F5H6N3	29.1407	29.3843	29.3832	29.0565	29.1753	29.1121		-0.0841775	0.919448		-0.208998	0.840813		-0.271107	0.793094			0.902143		29.217	29.1288	29.0762	29.5071	29.4334	29.2123	29.4492	29.5184	29.1819	29.4234	28.7453	28.9259	29.1312	28.7708	29.1239	29.2239	29.5826	29.4354	28.8142	29.4727	28.726
CLTB	Clathrin light chain B	P09497-2;P09497	27.611	27.7749	27.7353	27.8001	27.7341	27.9732		0.189123	0.730328		-0.0407662	0.986299		0.237895	0.86142			0.938911		27.6181	27.5969	27.6181	28.0243	27.4862	27.8142	27.8203	27.6595	27.726	27.8142	27.7129	27.9539	27.7195	27.0608	28.0349	28.0084	27.8324	28.2262	27.6389	28.5646	27.4629
CLTC	Clathrin heavy chain 1	Q00610-2;Q00610	33.7417	33.8097	33.7971	33.8487	33.9799	33.9351		0.107014	0.829227		0.170174	0.764904		0.137989	0.675123			0.591561		33.7252	33.7849	33.715	33.7946	33.7553	33.8792	33.7353	33.8233	33.8328	33.7946	33.9933	33.8516	33.7553	34.0753	33.8138	34.1604	33.87	33.8328	34.0911	33.8233	33.9933
CLU	Clusterin;Clusterin beta chain;Clusterin alpha chain;Clusterin	P10909-4;P10909;P10909-5;P10909-2;E7ETA7;H0YLK8;H0YC35;P10909-3;E7ERK6	31.7115	31.7556	31.698	31.8682	32.1557	32.1942		0.156667	0.857081		0.400187	0.610454		0.496179	0.447445			0.246921		31.9848	31.4083	31.7413	31.8756	31.5156	31.8756	31.8271	31.4134	31.8534	31.901	31.717	31.781	32.0737	32.2759	32.2308	32.1694	31.947	32.1634	32.1842	32.0283	32.4007
CMIP	C-Maf-inducing protein	Q8IY22;Q8IY22-2;Q8IY22-3	30.5592	30.4759	30.4941	30.5498	30.3857	30.4947		-0.00939115	0.979371		-0.0902222	0.828637		0.000686963	0.999473			0.853213		30.5014	30.5389	30.6372	30.4134	30.4032	30.611	30.393	30.4433	30.6458	30.6458	30.4629	30.6372	30.4532	30.4727	30.4532	30.341	30.2759	30.2869	30.5014	30.5109	30.6798
CMPK1	UMP-CMP kinase	P30085;Q5T0D2	30.1805	30.4134	30.3051	30.2866	30.3631	30.4091		0.106078	0.87175		-0.0503235	0.95758		0.103903	0.884162			0.912475		30.3196	30.0737	30.1483	30.2535	30.341	30.6458	30.5203	30.0864	30.3088	30.0737	30.4433	30.4334	30.196	30.4532	30.0349	30.5014	30.4629	30.2308	30.6714	30.2422	30.4919
CNBP	Cellular nucleic acid-binding protein	P62633-2;P62633-5;P62633;P62633-4;E9PDR7;B4DP17;P62633-3	23.2785	23.6958	22.654	23.4561	23.4312	23.0407		0.177552	0.936053		-0.264555	0.843406		0.386679	0.85385			0.761982		23.0602	23.8137	22.9617	23.3645	24.0011	23.7217	22.8573	22.6804	22.4242	24.2937	22.7486	23.5141	23.2678	23.3242	23.1284	23.8813	23.391	22.1009	22.7066	23.4551	23.9001
CNDP2	Cytosolic non-specific dipeptidase	Q96KP4;Q96KP4-2	30.2129	30.2192	30.303	30.4134	30.3697	30.3476		0.200476	0.81071		0.150553	0.842955		0.0445999	0.901324			0.892838		30.3303	30.1361	30.1724	30.2193	29.995	30.4433	30.4134	30.2308	30.2647	30.2647	30.6964	30.3515	30.341	30.5481	30.3196	30.4629	30.1483	30.1604	30.4134	30.393	30.4234
CNN2	Calponin;Calponin-2	B4DDF4;B4DUT8;Q99439;E7ENR3;Q99439-2	32.8792	32.9668	32.9713	32.9718	32.8699	32.9409		0.0926269	0.914332		-0.096873	0.844845		-0.0304352	0.954804			0.990936		33.02	32.648	32.9695	32.829	32.9522	33.1192	33.1223	32.7211	33.0705	32.9695	33.0283	33.2478	32.6415	32.9505	32.7653	33.0348	32.7292	32.8023	32.966	32.9505	33.0447
CNOT1	CCR4-NOT transcription complex subunit 1	A5YKK6;A5YKK6-2;F8WA87;A5YKK6-3;A5YKK6-4	28.2522	28.3532	28.3622	28.2276	28.3367	28.2986		-0.0246086	0.969869		-0.0164903	0.991054		-0.0636371	0.94862			0.994002		28.1652	28.2979	28.2935	27.9539	28.5052	28.6004	28.3869	28.7292	27.9705	28.2216	28.3662	28.391	27.9316	28.3992	28.3109	28.5203	28.1164	28.2935	28.1747	28.4194	28.3066
CNOT10	CCR4-NOT transcription complex subunit 10	Q9H9A5-4;Q9H9A5-3;Q9H9A5-2;Q9H9A5;F8WAF2;H7C1X9	23.6259	23.0683	22.8704	23.1792	23.2225	23.0867		-0.446636	0.819398		0.154227	0.854813		0.21629	0.949247			0.915319		23.5475	23.2049	24.1253	22.8716	23.3101	23.0231	23.0729	22.2776	23.2607	22.7422	23.4842	23.1128	23.3778	23.1499	23.0457	23.0735	23.6209	23.4041	24.3563	22.4374	22.149
CNP	2,3-cyclic-nucleotide 3-phosphodiesterase	P09543-2;P09543;F8W7I0	27.1739	27.4471	27.3319	27.2285	27.4587	27.3464		0.054581	0.92724		0.0116208	0.986656		0.0144693	0.9894			0.915931		27.3662	26.976	27.1795	27.4154	27.4629	27.4629	27.4862	26.7771	27.7325	27.2354	27.2535	27.0505	27.3745	27.4785	27.1984	27.5754	27.5826	27.0711	27.524	27.5826	27.2077
CNPY2		F8W031;F8VXJ7;F8W1K5	26.6897	26.832	26.5864	26.4977	26.8322	26.7121		-0.192055	0.846142		0.000223001	0.99965		0.125694	0.925502			0.91423		26.8623	26.4551	26.7518	27.0711	26.5507	26.8741	26.6865	26.0752	26.9977	26.6865	26.6998	26.2151	26.3894	26.6181	26.604	27.2803	26.8264	26.3712	26.9539	26.4938	27.0296
CNPY3	Protein canopy homolog 3	Q9BT09	27.5094	27.8344	27.7618	27.7955	27.7747	27.7524		0.286049	0.796154		-0.0596476	0.928342		-0.00942135	0.965409			0.761816		27.7895	27.3153	27.4234	27.6527	27.7895	28.0608	27.7453	27.8142	27.726	27.9031	27.9539	27.6251	27.6998	27.8858	27.604	27.9428	27.6663	27.6251	27.726	27.8445	27.8142
CNST	Consortin	Q6PJW8;Q6PJW8-2	28.8287	28.6434	28.9534	28.8045	28.6572	28.5481		-0.0242197	0.9791		0.0138446	0.990316		-0.40522	0.505623			0.703691		28.6629	28.9031	28.9202	28.5014	28.7389	28.6898	28.673	29.1288	29.0583	28.9089	29.0608	28.3282	28.9202	28.9089	28.5898	28.5052	28.6251	28.6181	28.6998	28.4394	28.4354
COASY	Bifunctional coenzyme A synthase;Phosphopantetheine adenylyltransferase;Dephospho-CoA kinase	Q13057;Q13057-2	27.446	27.2138	27.3195	27.4202	27.3798	27.4722		-0.0257915	0.979858		0.165973	0.842003		0.152669	0.671564			0.909936		27.0813	27.604	27.6527	27.2262	26.976	27.4394	27.3066	27.189	27.4629	27.2714	27.4234	27.7325	27.2535	27.6865	27.3745	27.1604	27.2979	27.3578	27.524	27.4314	27.5754
COG1	Conserved oligomeric Golgi complex subunit 1	Q8WTW3;E9PBL8	24.0387	24.0026	23.304	25.0227	24.8957	24.9909		0.984002	0.788007		0.8931	0.751642		1.68691	0.356292			0.29427		25.0275	23.7979	23.2907	24.8433	22.9926	24.1719	24.1795	23.1887	22.5439	25.6757	24.8191	24.6376	24.9584	25.3376	24.5344	25.1527	24.558	24.7441	24.895	25.3443	24.9803
COG2	Conserved oligomeric Golgi complex subunit 2	B7Z2Y2;Q14746-2;Q14746;F5H1E5;B7Z7N2	24.6899	24.5845	24.5418	24.7014	24.4083	24.8402		0.0114991	0.986166		-0.17625	0.899375		0.29839	0.448612			0.82653		24.6811	24.5696	24.8191	24.6209	24.7286	24.4041	24.4488	24.654	24.5225	24.6486	24.9089	24.4738	24.7746	24.8336	23.6954	24.7129	24.391	24.8336	24.9361	24.6595	24.9316
COG3	Conserved oligomeric Golgi complex subunit 3	Q96JB2;Q96JB2-2	25.08	24.9128	25.1327	24.5308	24.7125	24.7523		-0.549163	0.814185		-0.200278	0.841977		-0.38042	0.451847			0.738908		24.989	24.9584	25.2926	24.9089	24.9672	24.8623	25.2133	25.2354	24.9495	24.7594	23.6396	25.0813	24.6431	25.1908	24.654	24.654	24.3511	24.9584	24.7234	24.604	24.7234
COG4	Conserved oligomeric Golgi complex subunit 4	Q9H9E3;Q9H9E3-3;Q9H9E3-2	23.3268	23.9316	24.4053	23.8164	23.8974	24.4638		0.489503	0.900385		-0.0342234	0.989613		0.0584359	0.948677			0.834964		23.895	24.1174	21.9681	24.239	24.1253	23.4305	24.7389	24.2021	24.275	22.4228	24.3276	24.1174	24.3975	23.1911	24.3307	24.4923	23.5754	24.2961	24.3156	24.6096	24.6337
COG5	Conserved oligomeric Golgi complex subunit 5	Q9UP83-3;Q9UP83;Q9UP83-2	23.1432	24.1399	23.7207	23.8996	24.3511	24.1554		0.756407	0.811485		0.211184	0.739931		0.43467	0.819511			0.655361		22.8004	22.6018	24.0275	24.2168	23.9495	24.2535	24.0359	24.4738	22.6524	22.939	24.2244	24.0443	24.391	24.4676	24.1871	24.4676	24.2821	24.2535	24.391	23.9495	24.0275
COL6A3	Collagen alpha-3(VI) chain	E7ENL6;E9PCV6;E9PFQ6;P12111-2;P12111;P12111-3;E9PGQ9	24.2018	23.9208	23.7796	23.5286	24.7043	24.9253		-0.673195	0.878112		0.783503	0.642132		1.1457	0.514995			0.635695		24.1488	23.5594	24.8972	24.2096	24.2096	23.3434	22.9206	24.2463	24.1719	21.6896	23.5535	24.4738	24.3975	24.2678	25.065	24.6703	24.8142	24.5696	25.3066	24.7234	25.1015
COLGALT1	Procollagen galactosyltransferase 1	Q8NBJ5;E9PC06	24.5537	24.6658	24.4363	24.775	24.8294	24.1094		0.221289	0.941753		0.163606	0.842592		-0.326909	0.883086			0.913205		24.8576	24.0854	24.7182	24.5285	24.6209	24.8481	23.9225	24.7995	24.5869	25.9043	23.6577	24.6757	24.8623	25.0484	24.6703	25.0062	24.5926	24.604	22.9507	24.3307	24.5522
COMMD2	COMM domain-containing protein 2	F8WBW1;Q86X83	23.8499	23.726	22.3791	23.5411	23.5715	23.7052		-0.308774	0.908068		-0.154456	0.96794		1.32617	0.662065			0.81487		23.2671	23.9933	24.2891	23.4448	23.6757	24.0575	22.2216	21.1324	23.7831	24.1488	24.217	22.6234	23.1751	24.2005	24.6462	22.9686	22.4709	23.9134	24.2317	22.847	23.8288
COMMD3	COMM domain-containing protein 3	Q9UBI1;H0Y4E5;Q5T8Z0;H0Y4W0	23.8843	23.9482	24.9295	24.7465	24.8854	24.4027		0.862165	0.856738		0.937181	0.845838		-0.526846	0.834265			0.919696		25.2096	24.7024	21.741	24.8764	21.9492	25.019	25.2021	24.6595	24.9271	24.4984	25.1253	24.6865	24.6757	24.7945	24.5696	25.6431	24.5344	24.9134	25.3679	24.275	23.0545
COMMD5	COMM domain-containing protein 5	Q9GZQ3;H0YEQ6;E9PJE4	25.377	25.4103	25.3401	25.5117	25.4246	24.831		0.134721	0.896757		0.0143016	0.992194		-0.509152	0.871377			0.913488		25.1833	25.5404	25.4073	25.2354	25.1214	25.8741	25.1488	25.558	25.3135	25.1795	25.5522	25.4041	25.9111	25.1719	25.3612	25.5841	25.5812	25.1642	23.016	25.4073	25.7364
COMMD8	COMM domain-containing protein 8	Q9NX08	23.694	24.4253	24.5145	24.4422	24.3547	24.3307		0.748285	0.848735		-0.0706072	0.878361		-0.183744	0.873933			0.861375		24.1642	24.6703	22.2473	24.5404	24.3844	24.3511	24.5165	24.5285	24.4984	24.068	24.3712	24.6649	24.6649	24.1174	24.4676	24.3975	24.4362	24.4676	24.1253	24.8811	23.8488
COMMD9	COMM domain-containing protein 9	Q9P000;B4DQW0;Q9P000-2	26.2239	25.9368	26.0424	26.0361	26.0581	26.109		-0.187883	0.850084		0.121276	0.87046		0.0666507	0.919183			0.922499		26.1908	25.9495	26.5315	26.0505	25.8215	25.9383	26.1927	25.9716	25.9628	26.0975	26.2372	25.7821	26.0275	26.2188	25.9361	26.3359	25.7415	26.4473	26.0338	26.0484	25.9066
COMT	Catechol O-methyltransferase	P21964-2;P21964;E7EMS6;F8WBW9;E7EUU8	26.1243	26.1924	26.4717	26.1797	26.1852	26.2961		0.0554215	0.976068		-0.00718323	0.99883		-0.175623	0.674797			0.957757		26.6865	25.8288	25.8576	26.1738	25.8973	26.506	26.4629	26.4629	26.4892	26.632	26.3118	26.143	25.632	26.6595	26.4234	25.6431	26.0148	26.1312	26.1776	26.3695	26.506
COPA	Coatomer subunit alpha;Xenin;Proxenin	P53621;P53621-2	30.5535	30.6364	30.58	30.5871	30.7163	30.6903		0.0336065	0.931777		0.0799217	0.836709		0.110206	0.791888			0.837434		30.5014	30.611	30.5481	30.5014	30.7533	30.6544	30.611	30.6372	30.4919	30.6458	30.7129	30.5664	30.4234	30.8608	30.6964	30.6881	30.6198	30.611	30.8234	30.5109	30.8157
COPB1	Coatomer subunit beta	P53618	29.8476	29.9052	29.8505	29.9218	29.9456	30.0072		0.0741839	0.861924		0.0404011	0.912363		0.156738	0.516219			0.815786		30.0084	29.7096	29.8249	29.7692	29.8726	30.0737	29.8945	29.7453	29.9117	29.94	29.995	29.9259	29.8264	29.9539	29.94	30.0084	29.8799	29.9677	30.0864	30.0349	29.94
COPB2	Coatomer subunit beta	B4DZI8;P35606	29.662	29.7968	29.8432	29.9258	29.8988	29.9511		0.263727	0.633679		0.101923	0.898808		0.107931	0.664548			0.711645		29.6595	29.6285	29.6981	29.5951	29.8415	29.9539	29.7645	29.8534	29.9117	29.9259	30.0217	29.8829	29.8726	30.1604	29.7549	30.0864	29.5934	29.9539	30.0608	29.8638	29.9259
COPE	Coatomer subunit epsilon	F5H1E1;O14579;O14579-2;A6NE29	28.8199	28.9796	28.933	28.8752	28.979	29.0619		0.0552708	0.913855		-0.000507832	0.999153		0.128834	0.866878			0.921835		28.9787	28.7389	28.7421	28.7958	28.9539	29.189	29.1361	29.0137	28.6492	28.877	28.7708	29.0634	28.7895	29.1115	28.6424	29.2736	28.8887	28.7739	29.019	29.2123	29.2422
COPG1	Coatomer subunit gamma-1	Q9Y678	29.6021	29.6343	29.5201	29.6632	29.7368	29.7178		0.061072	0.914688		0.102552	0.893077		0.19766	0.364783			0.900677		29.5184	29.6216	29.6663	29.4254	29.7146	29.7629	29.4938	29.5222	29.5444	29.5969	29.9259	29.6303	29.4995	29.8309	29.5315	30.0479	29.5371	29.6216	29.8066	29.6881	29.7549
COPG2	Coatomer subunit gamma-2	Q9UBF2	27.61	27.7381	27.8058	27.8631	27.9299	27.912		0.253102	0.802273		0.19171	0.836244		0.106201	0.844896			0.840457		27.611	27.8445	27.3745	27.8081	27.509	27.8973	27.7895	27.7833	27.8445	27.9089	28.003	27.7325	27.8081	28.141	27.5463	28.1937	27.8385	27.8142	28.2308	27.8385	27.7645
COPS2	COP9 signalosome complex subunit 2	P61201;P61201-2;B4DIH5	29.0971	29.0407	29.142	28.8991	29.1674	29.1436		-0.197935	0.747939		0.126752	0.804414		0.0015502	0.998006			0.49424		28.995	29.2354	29.0608	29.0453	28.9259	29.1507	29.1628	29.2285	29.0349	28.8203	28.8653	29.0427	28.8682	29.2602	29.0889	29.2935	29.027	28.9539	29.2308	29.1913	29.1984
COPS3	COP9 signalosome complex subunit 3	Q9UNS2	28.3632	28.4654	28.3171	28.3476	28.4803	28.7015		-0.0155832	0.984823		0.0148543	0.981745		0.384449	0.454184			0.591554		28.4746	28.1795	28.4354	28.3109	28.4707	28.6146	28.3066	28.1507	28.4938	28.6458	28.5278	28.203	28.0137	28.4512	28.4234	28.611	28.4354	28.8858	28.5862	28.7195	28.6146
COPS4	COP9 signalosome complex subunit 4	Q9BT78;D6RFN0;D6RAX7;B3KST5;D6RD63	28.6064	28.6152	28.5549	28.6307	28.6778	28.8609		0.0243715	0.979426		0.0626121	0.90493		0.306029	0.486251			0.816025		28.5573	28.4629	28.7989	28.5165	28.6798	28.6492	28.5315	28.6898	28.4433	28.9031	28.7518	28.6146	28.2535	28.8653	28.7227	28.6998	28.4234	28.6697	28.9202	28.8887	28.965
COPS5	COP9 signalosome complex subunit 5	Q92905	27.7549	27.5134	27.706	27.7872	27.8619	27.7764		0.0323782	0.951165		0.348514	0.613134		0.0703893	0.947265			0.839187		27.6389	27.6998	27.9259	27.5463	27.3828	27.611	27.6998	27.8142	27.604	27.6663	27.7581	27.8564	27.8682	27.9259	27.6527	27.8081	28.0608	27.9705	27.8324	27.2625	28.0401
COPS6	COP9 signalosome complex subunit 6	E7EM64;Q7L5N1	27.768	28.0842	28.0169	28.0331	28.0998	28.0163		0.265075	0.811132		0.0155958	0.983655		-0.000580629	1			0.630703		27.8142	27.8858	27.604	27.9372	28.189	28.1263	28.0505	28.0914	27.9089	27.9539	28.1015	28.2935	27.7833	28.1984	27.9814	28.2216	27.9977	27.8973	28.0608	28.1312	27.976
COPS7A	COP9 signalosome complex subunit 7a	Q9UBW8;F5GYF7;F5H248;F5H7C6;F5H4U8	26.8194	26.798	26.9028	26.7915	26.8494	26.9515		-0.0279395	0.958859		0.0514272	0.868528		0.0486875	0.902092			0.841739		26.726	26.9428	26.7895	26.6458	26.8741	26.8741	26.9089	26.8019	26.9977	26.8504	26.9428	26.673	26.6998	26.9089	26.8973	26.8019	26.7895	26.976	26.9869	26.7518	27.0914
COPS7B	COP9 signalosome complex subunit 7b	Q9H9Q2;Q9H9Q2-3;Q9H9Q2-2	26.328	26.2911	26.059	26.5578	26.5577	26.4055		0.229739	0.815901		0.266589	0.835033		0.346506	0.711757			0.82632		26.4676	26.4785	26.038	26.1814	26.2926	26.3992	26.1075	25.8433	26.2262	26.6865	26.726	26.512	26.3066	27.217	26.4154	26.5374	26.0608	26.4298	26.7645	25.9111	26.5165
COPS8	COP9 signalosome complex subunit 8	Q99627;E9PGT6;B8ZZP3;Q99627-2;H7C3S9	27.6017	27.8033	27.5748	27.8137	27.8263	27.6927		0.21206	0.759832		0.0230184	0.971004		0.117951	0.894102			0.837576		27.6181	27.6931	27.4938	27.7453	27.8081	27.8564	27.7518	27.3828	27.5898	27.8623	27.9869	27.726	27.6798	28.0084	27.632	27.8203	27.8445	27.3325	27.7833	27.5536	28.1015
COPZ1	Coatomer subunit zeta-1	F8VVA7;P61923;F8VWL5;F8VYZ4;F8VS17;F8VXB1;F8VUC5;F8W156	27.3263	27.5167	27.6646	27.6619	27.5548	27.6257		0.335645	0.702346		0.0380944	0.977171		-0.0389155	0.96452			0.891277		27.4154	27.189	27.3745	27.3066	27.3578	27.8858	27.5014	27.391	28.1015	27.6998	27.632	27.7771	27.5389	27.4785	27.4234	27.8623	27.4551	27.2803	27.7895	27.5826	27.8504
CORO1A	Coronin-1A;Coronin	P31146;H3BRY3	32.968	32.975	33.0575	32.9533	32.8979	32.9871		-0.0147301	0.985109		-0.0771853	0.904508		-0.0703812	0.820984			0.969418		33.1254	33.0927	32.686	33.2178	32.9882	32.7191	33.1115	33.1052	32.9557	32.8422	32.8157	33.08	33.0753	32.7393	32.8271	33.0283	32.9967	32.9224	32.8774	33.0974	33.0512
CORO1B	Coronin-1B;Coronin	Q9BR76;F5H390;H0Y3L6;E7EW44	30.8409	31.0416	30.9745	31.0832	31.0964	31.1603		0.242283	0.818357		0.0547846	0.964106		0.185857	0.605834			0.860367		30.9539	30.8973	30.6714	30.7849	31.0864	31.2535	30.995	30.947	30.9814	30.7849	31.4032	31.1361	31.0084	31.0673	31.0217	31.4581	30.8385	31.0544	31.3828	31.1177	31.0864
CORO1C	Coronin-1C;Coronin	Q9ULV4;A7MAP0;B4E3S0;H0YHL7	33.6223	33.78	33.7759	33.6764	33.7469	33.7163		0.0541058	0.878134		-0.0330903	0.885094		-0.0596329	0.820992			0.684007		33.6735	33.6522	33.5412	33.87	33.7047	33.7653	33.8792	33.6735	33.7751	33.5754	33.7751	33.7353	33.6198	33.7252	33.7353	33.8328	33.6944	33.6522	33.6944	33.8138	33.7047
CORO7	Coronin-7;Coronin	P57737-2;P57737;I3L416;I3L167	25.5929	25.3441	25.2255	25.3375	25.292	25.3471		-0.255417	0.818815		-0.0521081	0.968315		0.121602	0.948144			0.957914		25.4738	25.7441	25.5609	25.4953	25.0975	25.4394	25.0608	25.4707	25.1449	25.0894	25.7077	25.4676	25.0854	25.7208	25.019	25.1214	25.3066	24.6486	25.8528	25.0975	25.7895
COTL1	Coactosin-like protein	Q14019;H3BT58	31.7726	31.8563	31.689	31.6572	31.6668	31.6344		-0.115389	0.858181		-0.189585	0.794858		-0.0546063	0.90561			0.891798		31.7453	31.8271	31.7453	31.7413	31.8497	31.978	31.6714	31.5799	31.8157	31.6458	31.7211	31.8792	31.3828	31.6881	31.3724	31.8571	31.7493	31.4083	31.7129	31.7965	31.6198
COX5A	Cytochrome c oxidase subunit 5A, mitochondrial	P20674;H3BRM5;H3BV69;H3BNX8	25.9534	26.5308	25.5142	24.9635	25.831	26.0152		-0.989884	0.886829		-0.699773	0.847906		0.501046	0.946712			0.966061		26.976	26.0296	24.8546	26.4984	26.5419	26.5522	26.3811	22.6005	27.5609	24.2096	23.5612	24.1073	27.976	25.6403	27.0711	24.0087	26.604	26.9539	23.5448	26.5754	26.9869
COX5B	Cytochrome c oxidase subunit 5B, mitochondrial	P10606	26.1619	26.014	26.3746	26.7443	26.8211	26.4017		0.582394	0.848609		0.807118	0.830153		0.0270783	0.985647			0.914246		26.4754	25.2714	26.7389	26.3712	26.2996	25.3712	26.1681	26.7895	26.1661	26.8385	26.2803	26.3877	27.4707	27.9146	27.4394	25.4645	26.4661	27.0914	26.2207	25.8069	26.4877
COX6B1	Cytochrome c oxidase subunit 6B1	P14854	28.9801	29.3211	29.5974	29.1913	29.5246	29.3766		0.211215	0.807391		0.203457	0.817297		-0.220853	0.835285			0.545913		29.2399	28.8203	28.8799	29.196	29.21	29.5573	29.8188	29.141	29.8324	29.141	29.0634	29.2007	29.3599	29.7786	29.3001	29.6285	29.391	29.0137	29.3452	29.4492	29.6981
COX7A2	Cytochrome c oxidase subunit 7A2, mitochondrial	D6RIE3;D6RGV5;P14406	26.5215	26.5767	26.8675	25.9303	26.3894	26.5708		-0.591197	0.91341		-0.187264	0.98169		-0.296707	0.82231			0.989774		26.6865	26.1391	26.7389	27.1604	26.4266	26.143	26.7129	27.1507	26.7389	23.6368	25.9495	26.0484	28.0864	27.6389	27.1984	23.6698	27.0505	27.17	26.3861	25.9628	26.7645
CP	Ceruloplasmin	E9PFZ2;P00450;H7C5R1	26.4422	25.9769	26.0134	26.2564	26.4171	26.0936		-0.185762	0.879859		0.44012	0.749068		0.0801212	0.95671			0.837512		26.3992	26.4738	26.4536	25.8694	25.5404	26.521	25.5014	26.4234	26.1154	26.433	26.673	25.767	26.1527	26.4583	26.4661	26.3877	26.3562	25.6125	26.0772	26.3084	26.3762
CPNE1	Copine-1	Q99829;A6PVH9;F2Z2V0;E7ENH5;Q5JX58;Q5JX59;Q5JX60;Q5JX44;Q5JX56;Q5JX55;Q5JX45	29.4959	29.3096	29.3945	29.1659	29.0483	29.013		-0.329978	0.519877		-0.261291	0.73695		-0.381502	0.531555			0.22607		29.5315	29.5109	29.4453	29.1288	29.4274	29.3724	29.1337	29.6527	29.3971	29.1337	29.1556	29.3109	29.0634	29.0137	28.8887	29.3367	28.9539	29.1532	28.8474	28.965	29.0864
CPNE2	Copine-2	Q96FN4;Q719H8	25.967	25.9904	25.9329	25.7502	26.1251	26.121		-0.216701	0.835578		0.134698	0.89085		0.188124	0.827853			0.848982		25.9517	25.9111	26.038	25.9628	25.7695	26.239	26.0211	26.1623	25.6153	25.4202	26.0914	25.8741	25.6153	26.5898	26.0464	25.8264	26.038	25.9628	26.1681	26.4815	25.8717
CPNE3	Copine-3	O75131;E5RG68	29.6892	29.5404	29.6501	29.5194	29.7165	29.6151		-0.16978	0.799257		0.17609	0.7171		-0.0349129	0.948057			0.785762		29.673	29.6931	29.7014	29.4194	29.5646	29.6372	29.57	29.8066	29.5736	29.2957	29.6198	29.5371	29.6251	29.8445	29.6764	29.766	29.579	29.4354	29.7146	29.5573	29.7533
CPOX	Oxygen-dependent coproporphyrinogen-III oxidase, mitochondrial	P36551	24.7609	24.8546	24.6657	24.7223	24.6245	24.4241		-0.0386182	0.976847		-0.230079	0.829682		-0.241554	0.797349			0.892297		25.1174	24.275	24.8904	25.1757	24.7286	24.6595	24.48	25.1795	24.3376	24.8997	24.7182	24.4234	24.8481	24.8997	24.4923	24.3518	24.7543	24.5463	24.2891	24.3031	24.558
CPPED1	Serine/threonine-protein phosphatase CPPED1	Q9BRF8;Q9BRF8-2	26.1124	26.0642	26.2422	26.4343	26.097	26.2599		0.321927	0.811009		0.0328031	0.987767		0.0177612	0.986307			0.91696		26.0935	26.3695	25.8741	25.8927	26.4831	25.8166	26.2535	26.5014	25.9716	26.8385	26.4598	26.189	26.2499	26.275	25.8834	26.425	25.8044	26.1391	26.4692	26.632	25.7995
CPT1A	Carnitine O-palmitoyltransferase 1, liver isoform	P50416;P50416-2	24.9563	25.3497	25.4715	24.4796	24.7158	25.2671		-0.476743	0.898764		-0.633867	0.589892		-0.204374	0.793188			0.766523		25.0401	25.0443	24.7846	25.5135	25.2856	25.2499	25.5926	25.5014	25.3205	23.3137	23.8481	24.5638	26.1927	24.4105	25.002	24.4617	24.989	25.6181	24.9716	25.3975	25.0813
CPT2	Carnitine O-palmitoyltransferase 2, mitochondrial	P23786	25.2993	25.5828	25.4127	25.4786	25.4114	24.8715		0.179257	0.895233		-0.171466	0.868741		-0.541185	0.817559			0.885403		25.2607	24.9271	25.7103	25.6237	25.1642	25.9606	25.4583	25.5926	25.1871	25.228	25.7103	25.2244	25.7518	25.7543	25.141	25.4645	25.2856	24.895	23.5379	25.4862	25.5667
CRAT	Carnitine O-acetyltransferase	P43155-2;P43155;C9JBD1;P43155-3	26.0793	26.2445	26.2265	26.353	26.4638	26.1604		0.273692	0.773782		0.219297	0.782239		-0.0660574	0.902391			0.594201		26.2607	25.902	26.0752	26.3307	26.1015	26.3014	26.3662	26.3307	25.9825	26.2002	26.4892	26.4089	26.3135	26.632	26.4425	26.632	26.1488	26.2463	26.1469	25.9825	26.2661
CRBN	Protein cereblon	F5H3U1;Q96SW2-2;Q96SW2	23.6465	25.0195	24.7329	23.933	24.4395	25.2266		0.286448	0.956004		-0.580005	0.838992		0.49375	0.422002			0.63168		24.4738	24.5754	21.8904	24.6757	25.4738	24.9089	24.9628	24.6376	24.5983	23.1643	23.2191	24.7389	24.6096	25.1371	24.6811	23.2639	24.6757	25.2821	25.239	25.4008	24.9847
CRELD2	Cysteine-rich with EGF-like domain protein 2	Q6UXH1-4;Q6UXH1;Q6UXH1-6;Q6UXH1-5;A6PWM2;Q6UXH1-3;Q6UXH1-2	24.8418	25.2738	25.1573	24.474	25.651	25.719		-0.367845	0.926475		0.37725	0.754217		0.561653	0.694508			0.688422		25.1015	24.5105	24.9134	25.0233	25.417	25.3811	25.4425	24.6649	25.3645	25.3745	22.4511	24.824	25.2463	25.3307	25.9134	25.9495	25.4105	25.6649	26.1391	25.0894	25.9825
CRK	Adapter molecule crk	P46108	25.3073	25.677	25.6628	25.5543	25.6003	25.7186		0.246956	0.859334		-0.0767247	0.912171		0.0557942	0.948606			0.857753		25.3342	25.2133	25.3745	25.5014	25.8166	25.7129	25.4551	25.8361	25.6971	25.2714	26.0732	25.767	25.1055	25.2926	25.6181	25.8336	25.6568	25.8264	25.4614	25.9628	25.6237
CRKL	Crk-like protein	P46109	29.2542	29.1803	29.2649	29.1225	29.2251	29.214		-0.131744	0.879434		0.0447644	0.964138		-0.0509388	0.871719			0.976217		29.3807	29.0137	29.3683	29.0322	29.1015	29.4073	29.326	29.1556	29.3131	29.019	29.341	29.2647	28.8653	29.4492	28.9841	29.326	29.141	29.0839	29.2803	29.196	29.2957
CRLF3	Cytokine receptor-like factor 3	Q8IUI8;B4DJU5	29.6198	30.0842	29.8845	29.7571	29.8905	29.9046		0.137277	0.81899		-0.19376	0.782682		0.0201513	0.965296			0.497378		29.7581	29.6268	29.4746	29.94	30.2647	30.0479	30.0217	29.5969	30.0349	29.8653	29.8096	29.7927	29.5609	29.632	30.0084	29.94	29.9814	30.0084	29.8564	29.7723	29.9814
CRTAP	Cartilage-associated protein	C9JP16;Q8NB01;O75718;B3KQR7;B3KUP0	25.5721	25.8743	25.1943	25.6555	25.7234	25.5691		0.0834134	0.957478		-0.150938	0.839673		0.374837	0.863984			0.912735		25.3745	25.3745	25.9672	26.1253	25.6568	25.8409	24.2535	25.6403	25.6891	25.6292	26.2785	25.4862	25.228	25.9134	25.7569	25.6918	25.5315	26.1015	25.6513	24.867	25.6568
CRYL1	Lambda-crystallin homolog	Q9Y2S2-2;Q9Y2S2	27.1141	27.2745	27.096	26.9708	27.046	27.1838		-0.14331	0.866907		-0.228525	0.857652		0.0878304	0.948079			0.959884		27.4473	26.8973	26.9977	27.2803	26.8973	27.6458	27.3066	26.8019	27.1795	26.7771	26.965	27.1115	27.0296	26.632	26.976	27.5463	27.0296	26.5898	27.2891	27.524	27.3325
CRYZ	Quinone oxidoreductase	Q08257;A6NN60;A6NP24;C9JH92;Q08257-2	26.8067	26.8313	26.8305	26.8002	26.9073	26.8796		-0.00658099	0.998021		0.0760263	0.85736		0.0490732	0.96641			1		26.6458	27.2077	26.5667	26.8504	26.9977	26.6458	26.8741	27.2714	26.346	26.632	27.019	26.6181	26.9316	27.019	26.8741	26.8504	26.8858	26.965	26.7518	26.5754	27.2262
CRYZL1	Quinone oxidoreductase-like protein 1	O95825;A6NMA8;A6NND8;A6NHJ8;C9K0F7;H7C3I5;B3KQ77;C9JAL0	26.6959	26.7656	26.9512	27.0625	26.9258	26.9655		0.366581	0.836973		0.160136	0.828954		0.0142654	0.982291			0.838705		26.8858	26.8142	26.3877	26.632	26.6458	27.019	26.8385	26.726	27.2891	26.726	27.1984	27.3828	26.9428	27.141	26.8142	26.8504	26.8973	27.1507	26.9869	26.8385	26.8858
CS	Citrate synthase;Citrate synthase, mitochondrial	B4DJV2;O75390	29.1997	29.4108	29.5968	29.6835	29.6923	29.4603		0.483832	0.68781		0.281565	0.755023		-0.136478	0.821774			0.425684		29.3174	29.0349	29.2467	29.6233	29.2262	29.3828	29.4314	29.9117	29.4473	29.7129	29.4113	29.7533	29.8564	29.893	29.49	29.8887	29.4976	29.5109	29.5259	29.3088	29.4957
CSDE1	Cold shock domain-containing protein E1	E9PGZ0;G5E9Q2;O75534-2;O75534;E9PLT0	24.9295	25.8008	25.7206	25.4888	25.2083	25.8556		0.559311	0.896829		-0.592427	0.843471		0.135008	0.865212			0.916941		25.9716	25.8973	22.9197	26.2643	25.3811	25.7569	25.6703	25.797	25.6944	25.7024	25.3578	25.2996	25.5955	23.8894	25.4457	25.6125	25.8858	25.6595	25.7821	26.2944	25.6865
CSE1L	Exportin-2	P55060-3;P55060;F8W904;B4DUC5;E7EPX1	29.157	29.198	29.1328	29.2465	29.2618	29.2564		0.0895616	0.850621		0.0637949	0.914939		0.123581	0.774157			0.936001		29.1065	29.1337	29.2308	29.1065	29.0762	29.4113	29.0839	29.3088	29.0057	29.141	29.4532	29.2007	29.1913	29.4823	29.0914	29.2869	29.1866	29.1604	29.3131	29.1507	29.4012
CSK	Tyrosine-protein kinase CSK	P41240;E7EQW6	30.4622	30.3827	30.5201	30.5255	30.4702	30.4728		0.0633443	0.910578		0.0875258	0.869082		-0.0473005	0.845781			0.934964		30.5481	30.3088	30.5296	30.3724	30.2647	30.5109	30.5389	30.4919	30.5296	30.4134	30.6198	30.6964	30.3724	30.6285	30.4919	30.5296	30.2308	30.3515	30.5203	30.4532	30.5664
CSNK1A1	Casein kinase I isoform alpha	P48729;Q71TU5;P48729-2;E5RG27;D6RGE5	23.4061	23.7094	23.5643	23.5978	23.2316	23.1267		0.191705	0.831669		-0.477802	0.85648		-0.437561	0.821082			0.928077		23.3239	23.2961	23.5983	23.4676	23.1584	24.5021	23.417	23.9383	23.3376	23.5638	23.5983	23.4551	23.774	22.1837	22.9773	24.167	23.5983	23.48	23.7665	23.201	22.0593
CSNK2A1	Casein kinase II subunit alpha	E7EU96;Q5U5J2;P68400;P68400-2	27.0792	27.3407	27.3559	27.4803	27.3264	27.4725		0.401057	0.64623		-0.0143681	0.991658		0.116663	0.876345			0.827091		27.189	26.8504	27.1984	27.3153	27.3325	27.3745	27.189	27.4314	27.4473	27.4862	27.6458	27.3578	27.4314	27.2262	27.217	27.8973	26.965	27.2354	27.5463	27.3066	27.8019
CSNK2A2	Casein kinase II subunit alpha	P19784;H3BSA1;H3BV19	27.5478	27.5918	27.5342	27.4595	27.595	27.6246		-0.088285	0.812867		0.00319465	0.99674		0.0903244	0.851044			0.856798		27.4938	27.5315	27.6181	27.5536	27.5898	27.632	27.4862	27.6931	27.4234	27.5014	27.4473	27.5315	27.3578	27.4473	27.4938	27.726	27.7129	27.4234	27.7064	27.604	27.7645
CSNK2B	Casein kinase II subunit beta	Q5SRQ6;P67870;Q5SRQ3	25.1655	25.5332	25.6876	25.4728	25.0009	25.181		0.307332	0.814428		-0.532206	0.845169		-0.506608	0.688936			0.908998		25.1795	25.1488	25.1681	25.5135	25.5754	25.5105	25.8881	25.3679	25.8069	25.705	25.2207	25.8599	25.1055	23.4717	25.7441	25.4953	25.2926	25.1293	25.4676	24.5344	25.5926
CSRP1	Cysteine and glycine-rich protein 1	P21291;B3KVC9;E9PS42;E9PND2;E9PP21	32.0581	32.2135	32.3138	32.0112	32.0269	32.0947		-0.046985	0.879395		-0.186572	0.636793		-0.219128	0.479279			0.161996		32.0348	32.1146	32.025	32.1544	32.2048	32.2814	32.2842	32.3594	32.2979	32.0896	31.9574	32.0896	31.9081	31.933	32.0283	32.1753	31.9712	31.9882	32.0184	32.13	32.2422
CST3	Cystatin-C	P01034	23.2524	23.416	23.8232	24.5115	23.532	23.5289		1.25918	0.799913		0.1159	0.978706		-0.294279	0.900881			0.835612		23.6907	21.7703	24.2961	22.4573	23.2096	24.5812	24.5344	22.9317	24.0034	24.7077	24.3396	24.7746	24.2244	23.4401	23.2913	24.2535	23.1429	22.9541	23.1236	24.5579	23.48
CTBP1	C-terminal-binding protein 1	Q13363-2;Q13363;D6RAX2;E7ESU7;E7EPF8;E9PGB1	26.2789	26.2581	26.1454	26.0949	26.2856	26.167		-0.184047	0.872763		0.0274731	0.971531		0.0215562	0.982998			0.974896		26.0813	26.1234	26.632	26.1075	26.2499	26.417	25.7286	26.3975	26.3101	25.9495	26.5029	25.9977	25.9293	26.4218	26.1174	26.3992	26.204	26.3745	26.4298	25.705	26.1585
CTDSPL	CTD small phosphatase-like protein	O15194-2;O15194;H7C2S4	23.4	23.6946	23.2866	23.6082	23.3807	23.3159		0.20823	0.954604		-0.313985	0.912331		0.0293147	0.979868			0.997905		23.5285	22.4325	24.239	22.6269	23.7389	24.7182	23.1484	23.2779	23.4335	23.867	23.4453	22.6909	24.4298	24.0275	23.4676	22.4842	23.5434	23.0276	23.5522	23.868	22.8159
CTGF	Connective tissue growth factor	P29279;P29279-2	27.1818	27.168	27.2052	27.394	26.9537	26.8689		0.212216	0.856386		-0.214274	0.84196		-0.336398	0.72505			0.768918		27.2535	27.141	27.1507	26.604	27.391	27.509	26.8973	26.9539	27.7645	27.509	27.0813	27.1115	27.8741	26.965	26.9869	26.9428	26.9202	26.9539	26.7645	26.8142	26.9428
CTNND1	Catenin delta-1	E9PIE5;C9JZR2;F8WA43;O60716-8;O60716-7;O60716-5;O60716-3;O60716-6;O60716-4;O60716-2;O60716;O60716-24;O60716-23;O60716-21;O60716-19;O60716-22;O60716-20;O60716-16;O60716-18;O60716-15;O60716-17;O60716-13;O60716-11;O60716-14;O60716-12;O60716-10;O60716-9;O60716-32;O60716-31;O60716-29;O60716-27;O60716-30;O60716-28;O60716-26;O60716-25	26.3677	26.0686	26.173	26.4487	26.1108	26.1542		0.0809938	0.899848		0.0421438	0.915531		-0.0187682	0.980036			0.594794		26.239	26.4138	26.4504	26.0874	25.9428	26.1757	26.141	26.391	25.9869	26.2445	26.6998	26.5165	26.3342	26.1719	26.1719	25.9428	26.1565	26.1585	26.5255	25.8576	26.0752
CTPS1	CTP synthase 1	P17812;B4DR64	28.9516	28.9447	28.9236	28.8095	28.9278	28.8291		-0.142102	0.810315		-0.0168839	0.967917		-0.0945557	0.818681			0.84706		28.9567	28.8712	29.027	28.877	28.9117	29.0453	28.7581	28.9622	29.0505	28.7989	28.9202	28.8973	28.6216	28.8829	28.9259	29.0401	28.8623	28.8264	28.7549	28.7292	29.0057
CTPS2	CTP synthase 2	Q9NRF8	27.8476	27.8063	27.8307	27.897	27.7713	27.9484		0.0493765	0.954777		-0.0349902	0.982201		0.117742	0.870287			0.974112		27.7895	27.9089	27.8445	27.6798	27.6527	28.0864	27.9202	27.8264	27.7453	27.6251	28.2077	27.9595	27.7958	28.1361	27.4785	27.6998	27.7708	27.9539	28.0401	27.5826	28.217
CTSA	Lysosomal protective protein;Lysosomal protective protein 32 kDa chain;Lysosomal protective protein 20 kDa chain	P10619;Q5JZH0	29.1604	29.6452	29.3445	29.2624	29.3498	29.3221		0.10204	0.887376		-0.295433	0.761703		-0.0223997	0.966385			0.679676		29.4254	29.1214	28.9344	29.6458	29.4113	29.8785	29.2193	29.2262	29.588	29.2007	29.1795	29.2602	29.4093	29.6372	29.4629	29.1386	29.1604	29.1337	29.362	29.5826	29.21
CTSC	Dipeptidyl peptidase 1;Dipeptidyl peptidase 1 exclusion domain chain;Dipeptidyl peptidase 1 heavy chain;Dipeptidyl peptidase 1 light chain	F5HGG6;P53634	28.214	28.172	28.0762	28.5441	28.4337	28.3594		0.330147	0.817613		0.261658	0.779404		0.2832	0.526097			0.679845		28.3787	27.8081	28.4551	28.2354	28.2354	28.0453	28.0349	28.2123	27.9814	28.7927	28.6492	28.6181	28.1164	28.8415	28.2803	28.3282	28.2847	28.391	28.4938	28.1214	28.4314
CTSD	Cathepsin D;Cathepsin D light chain;Cathepsin D heavy chain	P07339;H7C469;H7C1V0;C9JH19	28.6137	28.5455	28.6814	28.6549	28.9048	28.8758		0.0411952	0.962651		0.359306	0.703848		0.194428	0.717078			0.706105		28.8264	28.4394	28.5754	28.7453	28.1652	28.726	28.9512	28.6146	28.4785	28.5463	28.611	28.4433	29.019	29.019	28.8623	28.8234	28.9146	28.7895	28.9512	28.7676	28.995
CTSW	Cathepsin W	P56202;E9PI30	27.8339	27.3735	27.6907	27.5655	27.0847	27.1875		-0.268391	0.678131		-0.28874	0.712096		-0.503108	0.519937			0.070056		27.7645	27.7129	28.0243	27.0505	27.5609	27.509	27.2625	27.7958	28.0137	27.5969	27.4785	27.5969	27.5898	27.1115	27.1312	26.965	27.1312	27.1015	27.2535	27.1507	27.2445
CTTN	Src substrate cortactin	Q14247	32.3115	32.3501	32.4064	32.3118	32.18	32.2696		0.000238101	0.99806		-0.170116	0.795596		-0.13684	0.774729			0.848749		32.3568	32.2106	32.3672	32.4605	32.3879	32.2019	32.4159	32.375	32.4284	32.4083	32.245	32.4007	32.1931	32.0737	32.2703	31.9983	32.3776	32.3802	32.1422	32.4823	32.0737
CUL1	Cullin-1	Q13616;E7EWR0;B3KTW0	25.9892	25.8939	26.126	25.8959	25.9052	25.9775		-0.0933394	0.918464		0.0113762	0.993212		-0.148525	0.787157			0.939802		25.9716	25.9271	26.0691	26.1871	25.6181	25.8764	26.3494	25.8741	26.1546	25.4457	25.9316	26.1852	26.0211	25.6068	25.895	26.2426	25.8764	26.0629	26.0127	25.824	26.0105
CUL2	Cullin-2	Q13617;G3V1S2;Q5T2B7;Q5T2B5	27.7647	27.9957	27.8639	27.8772	27.8854	28.0112		0.112418	0.846806		-0.110271	0.87768		0.14726	0.639276			0.844433		27.8504	27.7708	27.673	27.7645	28.0864	28.1361	27.7645	27.965	27.8623	27.8916	28.0762	27.7389	27.8019	28.1984	27.632	27.8081	27.9031	28.0084	27.9428	27.9428	28.1507
CUL3	Cullin-3	Q13618-2;Q13618;Q13618-3	27.8199	27.9472	27.8278	27.757	27.7484	27.9093		-0.062849	0.898419		-0.198784	0.797871		0.081501	0.896098			0.914667		27.8445	27.7064	27.9089	27.8019	27.7771	28.2625	27.8019	27.8858	27.7958	27.673	27.965	27.632	27.7581	27.8019	27.8142	27.7453	27.632	27.6595	28.1652	27.7518	28.0608
CUL4A	Cullin-4A	Q13619;Q13619-2	26.5645	26.5856	26.3719	26.2441	26.423	26.2128		-0.320347	0.675615		-0.162589	0.841301		-0.1591	0.864724			0.679039		26.433	26.6865	26.574	26.8973	26.3778	26.4815	26.2909	26.632	26.1927	26.4218	26.1661	26.1642	26.2244	26.4692	26.189	26.574	26.4598	26.0296	26.2517	25.9517	26.6181
CUL4B	Cullin-4B	Q13620-3;Q13620-1;Q13620	23.4119	24.2256	24.2925	23.2537	24.588	24.2041		-0.158278	0.963961		0.362371	0.707033		-0.0883953	0.959996			0.553183		23.6431	24.3511	22.2416	24.3307	24.2607	24.0854	24.4425	23.8481	24.5869	23.6105	22.126	23.82	23.4581	24.7787	24.417	24.867	24.2891	24.2607	23.2447	24.9134	24.3975
CUL5	Cullin-5	Q93034	27.0071	27.0928	26.9457	27.2076	27.089	27.088		0.200525	0.785849		-0.00380309	0.9989		0.14226	0.818853			0.913391		27.0505	26.9202	27.0505	26.8142	27.0813	27.3828	27.0711	27.0401	26.726	27.1507	27.4473	27.141	27.0914	27.189	27.1604	27.217	26.7895	27.0505	27.3578	26.8623	27.0813
CUTA	Protein CutA	O60888-3;O60888;O60888-2;C9IZG4	27.0382	27.0439	27.3134	27.2841	27.3874	27.2688		0.245916	0.84791		0.343576	0.837476		-0.0446181	0.958884			0.933127		27.2714	27.0914	26.7518	26.9202	26.976	27.2354	27.0813	27.5609	27.2979	27.3153	27.5609	27.4707	26.7895	28.1937	27.2891	27.341	26.726	27.2625	27.4473	26.8264	27.5389
CXCL12	Stromal cell-derived factor 1;SDF-1-beta(3-72);SDF-1-alpha(3-67)	P48061-2;P48061-5;P48061;P48061-6;P48061-3;P48061-4	24.7369	25.0716	24.6435	24.4647	24.373	24.0775		-0.272156	0.956114		-0.698579	0.870352		-0.566058	0.776418			0.961368		23.472	25.3443	25.3943	25.4105	25.1871	24.6172	24.1313	24.9089	24.8904	23.6561	23.4312	25.3578	25.4138	25.0659	24.9803	25.4362	22.0097	24.6209	24.4676	23.0231	24.1983
CXCL2	C-X-C motif chemokine 3;GRO-gamma(5-73);C-X-C motif chemokine 2;GRO-beta(5-73)	P19876;P19875	25.6684	24.3821	24.7623	25.586	24.1208	24.1171		-0.0824544	0.95273		-0.261387	0.972923		-0.645257	0.896349			0.847433		26.1946	25.4362	25.3745	24.1253	25.8142	23.2069	25.9955	25.6348	22.6566	25.6838	25.705	25.604	25.3511	25.4831	25.3578	21.8572	23.7849	25.2133	25.2133	23.474	22.5677
CXCL5	C-X-C motif chemokine 5;ENA-78(8-78);ENA-78(9-78);C-X-C motif chemokine;C-X-C motif chemokine 6;Small-inducible cytokine B6, N-processed variant 1;Small-inducible cytokine B6, N-processed variant 2;Small-inducible cytokine B6, N-processed variant 3	P42830;D6RF92;P80162	23.5518	23.3264	22.7986	23.7149	23.3028	23.9648		0	0		0	0		0	0			0.89085		22.9449	23.505	24.2055	24.4544	23.1473	22.3774	21.0694	23.8711	23.4552	23.1122	24.0788	23.5796	24.0891	23.3056	22.9708	23.5243	23.4107	24.2022	23.2051	24.5739	23.8779
CYB5R1	NADH-cytochrome b5 reductase 1	Q9UHQ9;H7C0R7	24.3751	24.4795	24.6716	24.4059	23.6769	23.5692		0.0307438	0.995647		-0.802616	0.751546		-1.10239	0.479478			0.716786		23.2584	25.1332	24.7338	24.604	24.0854	24.7492	24.6431	24.5285	24.8433	23.3449	24.7338	24.2244	25.3205	22.6594	24.2244	23.7796	24.0443	23.7699	23.1862	24.2961	23.0247
CYB5R3	NADH-cytochrome b5 reductase 3;NADH-cytochrome b5 reductase 3 membrane-bound form;NADH-cytochrome b5 reductase 3 soluble form	P00387-2;P00387;P00387-3;B1AHF3	29.1109	29.3074	29.4998	28.7597	28.9779	29.059		-0.351277	0.823181		-0.329527	0.802715		-0.4408	0.331166			0.428538		29.0711	29.0401	29.2216	29.027	29.4053	29.49	29.2891	29.5389	29.6714	28.6216	28.524	28.5499	29.3431	29.4053	28.7486	28.6216	29.1361	29.0217	29.0349	29.019	29.1604
CYC1	Cytochrome c1, heme protein, mitochondrial	P08574	23.661	24.0125	24.2888	23.7618	23.1116	22.8561		0.100841	0.979079		-0.900921	0.623284		-1.43269	0.518096			0.693102		23.9043	23.3606	23.7182	23.9847	24.2096	23.8433	24.2021	24.4923	24.1719	24.688	22.547	22.6949	25.1174	22.9164	23.7594	23.2343	22.5362	22.5865	22.8748	21.927	24.0359
CYCS	Cytochrome c	C9JFR7;P99999	26.9143	27.4255	27.3056	26.6941	27.0601	26.6517		-0.220149	0.872491		-0.36541	0.836272		-0.653959	0.653584			0.636422		26.6998	27.2535	26.7895	27.7129	27.189	27.3745	27.524	27.1214	27.2714	26.9428	26.2696	26.5135	27.0505	26.9869	27.0401	26.4938	27.7195	27.3066	25.9539	26.673	26.673
CYFIP1	Cytoplasmic FMR1-interacting protein 1	Q7L576;E7EQ04;Q7L576-2	31.7495	31.5237	31.539	31.6691	31.6415	31.6231		-0.0803998	0.847464		0.117717	0.797747		0.0841735	0.79189			0.645328		31.6839	31.8973	31.6671	31.4334	31.4581	31.6798	31.4775	31.6285	31.5109	31.6501	31.7252	31.7211	31.5799	31.7731	31.5754	31.5844	31.6329	31.6372	31.7493	31.4775	31.6285
CYFIP2	Cytoplasmic FMR1-interacting protein 2	E7EVJ5;E7EVF4;Q96F07-2;E7EWA4;Q96F07;F5H583	25.5868	25.4453	25.6232	25.5958	25.7312	25.6639		0.00899522	0.996958		0.28595	0.829167		0.0407225	0.963099			0.990148		25.2535	25.2643	26.2426	25.1908	25.5869	25.558	25.7312	25.4953	25.6431	25.772	25.3511	25.9157	25.3443	25.7594	25.5492	26.2517	25.3645	25.3205	26.1527	25.654	25.5285
CYLD	Ubiquitin carboxyl-terminal hydrolase CYLD	F5H2R7;Q9NQC7-2;Q9NQC7;H3BS09	24.2701	23.4662	23.759	23.2203	23.1253	23.2173		-1.04987	0.748863		-0.340828	0.904064		-0.541749	0.872116			0.890717		24.0691	24.6971	24.0443	23.7796	23.417	23.202	23.8058	24.7796	22.6917	24.0359	23.2551	22.3431	23.247	22.7421	22.4824	24.7534	22.5235	21.8923	24.2827	23.0902	23.6041
CYTH2	Cytohesin-2	Q99418-2;Q99418;G5E9B7	27.1823	26.9188	27.0778	27.3612	27.2654	27.202		0.178886	0.818425		0.346581	0.486026		0.124175	0.877096			0.619764		26.9869	27.2535	27.3066	26.9977	26.9202	26.8385	26.8385	27.3239	27.0711	27.604	27.3662	27.3239	27.1507	27.3745	27.1984	27.4073	27.0813	27.189	27.4073	26.8623	27.3494
DAAM1	Disheveled-associated activator of morphogenesis 1	Q9Y4D1-2;Q9Y4D1;Q9Y4D1-3	27.6707	27.6677	27.8987	27.4835	27.5381	27.6269		-0.187198	0.916558		-0.129574	0.841249		-0.271802	0.692056			0.913916		27.6663	27.6527	27.6931	27.8741	27.5536	27.5754	27.8264	28.217	27.6527	27.1604	26.976	27.4314	28.3662	27.3992	27.6251	27.4154	27.7129	27.6663	27.7064	27.4154	27.7195
DAB2	Disabled homolog 2	P98082-3;P98082;P98082-2	27.7459	27.8045	27.7449	27.6674	27.7705	27.6793		-0.0785955	0.923404		-0.0339828	0.98999		-0.0655998	0.921481			1		27.6865	27.5754	27.976	27.2625	28.0296	28.1214	27.5969	27.7064	27.9316	27.7833	27.9089	27.611	27.3662	27.9428	27.5826	28.1015	27.4551	27.4785	27.9316	27.524	27.7833
DAG1	Dystroglycan;Alpha-dystroglycan;Beta-dystroglycan	Q14118	26.1597	26.2611	26.0326	26.325	26.1141	25.8238		0.165331	0.851111		-0.146948	0.9153		-0.208796	0.822322			0.832459		26.1757	26.0975	26.2058	26.2944	26.2961	26.1927	26.1391	25.6891	26.2696	26.4692	26.0401	26.1449	26.6458	26.5898	26.4551	25.4488	25.9628	25.9517	26.1546	25.5404	25.6486
DAK	Bifunctional ATP-dependent dihydroxyacetone kinase/FAD-AMP lyase (cyclizing);ATP-dependent dihydroxyacetone kinase;FAD-AMP lyase (cyclizing)	Q3LXA3;H0YCY6	28.8849	28.9642	28.9106	28.9908	28.9505	28.9277		0.105898	0.863378		-0.0137668	0.983579		0.0171229	0.955847			0.971669		28.7195	28.9456	28.9896	28.8415	29.019	29.0322	28.805	28.9372	28.9896	28.8445	29.2147	28.9117	28.9923	29.0084	28.7802	29.0401	28.9732	28.8534	28.9031	28.8858	29.0686
DAPP1	Dual adapter for phosphotyrosine and 3-phosphotyrosine and 3-phosphoinositide	Q9UN19;Q9UN19-2	28.1668	28.2457	28.0863	28.2694	28.1703	28.2883		0.102595	0.848401		-0.0753771	0.842329		0.202029	0.714456			0.841827		28.0813	28.17	28.249	28.1164	28.267	28.3536	28.066	28.0813	28.1115	28.362	28.3239	28.3153	28.0762	28.1842	28.0453	28.258	28.1937	28.0914	28.4113	28.1115	28.5389
DARS	Aspartate--tRNA ligase, cytoplasmic	P14868;Q68CR9	30.4483	30.371	30.4066	30.4221	30.5112	30.5704		-0.0261539	0.957152		0.14026	0.804277		0.163788	0.524975			0.740337		30.4532	30.5296	30.362	30.3196	30.3303	30.4629	30.393	30.4032	30.4234	30.3515	30.5664	30.4727	30.2979	30.5934	30.4629	30.6798	30.3088	30.4134	30.6198	30.611	30.6372
DARS2	Aspartate--tRNA ligase, mitochondrial	Q6PI48	22.2303	23.3302	23.154	23.6921	23.6286	23.7013		1.4619	0.748279		0.298357	0.91377		0.547308	0.622697			0.551185		21.2813	22.2546	23.1548	22.7642	23.427	23.7995	23.1047	23.2262	23.1312	23.4834	23.7796	23.3035	24.2021	24.1174	22.2303	24.1906	23.976	23.0135	23.9134	23.8764	24.002
DAZAP1	DAZ-associated protein 1	Q96EP5-2;Q96EP5	26.2477	26.4105	26.5372	26.3175	26.4586	26.2921		0.0697883	0.956759		0.0480758	0.965411		-0.245097	0.799517			0.939014		26.7518	25.8215	26.17	26.4923	26.2732	26.4661	26.8741	26.1055	26.632	26.1585	26.5448	26.317	26.2499	26.1757	26.2732	26.726	26.6595	26.2961	26.4122	26.524	25.9361
DBN1	Drebrin	A8MV58;D6R9W4	30.3139	30.5324	30.5499	30.6206	30.518	30.6191		0.306697	0.794826		-0.0144412	0.988037		0.0691808	0.897894			0.824146		30.5296	30.1361	30.2759	30.5389	30.5664	30.4919	30.6881	30.5481	30.4134	30.8385	30.7129	30.5481	30.3828	30.196	30.6714	30.6022	30.6022	30.6798	30.4727	30.8608	30.4629
DBNL	Drebrin-like protein	Q9UJU6-2;B4DDP6;B4DDD6;C9J7P1	30.9671	31.1525	31.1131	30.9169	30.9371	31.0217		-0.0502033	0.896053		-0.215332	0.663939		-0.0913992	0.885633			0.767583		31.0217	30.9188	30.9609	31.196	31.0479	31.2135	31.341	30.8081	31.1901	30.9259	31.0608	30.9117	30.7692	31.0084	30.8534	30.8004	31.0864	31.1604	30.9609	31.0608	30.9046
DBT	Lipoamide acyltransferase component of branched-chain alpha-keto acid dehydrogenase complex, mitochondrial	Q5VVL7;P11182;F5H1F9	24.9954	26.1629	25.1251	25.0945	26.0347	25.4445		0.099058	0.986337		-0.128183	0.849804		0.319398	0.957119			0.931353		26.4938	24.88	23.6125	25.9694	26.0547	26.4645	22.6653	26.6595	26.0505	22.8223	25.7415	25.5075	26.3066	25.9781	25.989	26.2445	25.9271	26.0148	23.7506	25.9293	26.0833
DCAF7	DDB1- and CUL4-associated factor 7	E9PCY4;P61962	24.6428	23.3549	23.572	24.1343	23.1138	23.3344		-0.508509	0.855917		-0.241052	0.965496		-0.237572	0.94914			0.833332		24.6376	24.6096	24.6811	22.266	24.5165	23.2821	22.992	23.4418	24.2821	25.1371	24.3583	22.949	24.0926	22.87	21.7836	23.192	24.6096	24.7492	23.0541	21.8919	23.6424
DCD	Dermcidin;Survival-promoting peptide;DCD-1	P81605;P81605-2	24.6934	24.8571	23.7863	23.4908	24.414	24.2559		-1.20252	0.872758		-0.443065	0.888471		0.469629	0.854761			0.922649		23.133	24.0382	26.9089	23.9696	25.341	25.2607	22.879	24.7286	23.7512	26.1795	22.8343	22.2735	22.6761	24.654	24.6096	25.4676	22.9248	24.7896	23.4137	24.7543	24.066
DCP1A	mRNA-decapping enzyme 1A	Q9NPI6	24.8986	24.4992	24.8226	24.9951	24.6818	24.8617		0.0965177	0.957298		0.182628	0.836922		0.0390113	0.965376			0.856914		24.7492	24.5105	25.4362	24.2535	24.8142	24.4298	24.6153	25.2207	24.632	25.4769	24.8623	24.918	24.7234	24.4105	24.8717	24.8811	24.5638	25.217	24.8481	24.7441	24.6376
DCTD	Deoxycytidylate deaminase	P32321;P32321-2;D6RBJ9	26.8512	27.2464	27.115	27.1331	27.174	27.205		0.281978	0.63605		-0.0724255	0.902063		0.0900699	0.884097			0.591651		26.7771	26.7895	26.9869	27.3153	27.1795	27.2445	27.0813	26.8973	27.3662	27.0711	27.2714	27.0296	27.1604	27.4629	27.141	27.1604	26.9316	27.0608	27.2535	27.1312	27.3745
DCTN1	Dynactin subunit 1	E7EX90;E9PFS5;A8MWX9;E9PGE1;A8MY36;Q14203;G5E9H4;Q14203-2;Q6AWB1	30.505	30.5661	30.5966	30.5101	30.6891	30.615		0.00507323	0.991972		0.12301	0.847725		0.0183592	0.946436			0.850075		30.6285	30.4532	30.4334	30.3303	30.6881	30.6798	30.6544	30.4727	30.6629	30.4919	30.6372	30.5389	30.3724	30.8534	30.6629	30.7771	30.4629	30.5573	30.6198	30.6285	30.6544
DCTN2	Dynactin subunit 2	F5H2S7;Q13561;Q13561-3;Q13561-2;F5H223;F8WAG8;F8W1I6;F8VW18	30.4437	30.4976	30.5535	30.3679	30.3323	30.4674		-0.0757914	0.897269		-0.165285	0.811462		-0.0861217	0.752355			0.824747		30.5573	30.2535	30.5203	30.3828	30.4727	30.6372	30.4919	30.5664	30.6022	30.5389	30.3724	30.341	30.2193	30.4433	30.2759	30.5109	30.099	30.4134	30.4727	30.3724	30.611
DCTN3	Dynactin subunit 3	O75935-3;O75935;F8W786;Q8NB28;O75935-2	27.5974	27.5754	27.4669	27.6949	27.5236	27.6137		0.0974838	0.941841		-0.0518055	0.975804		0.146803	0.885035			0.995009		27.189	27.611	27.9923	27.1214	27.9869	27.6181	27.3992	27.9202	27.0813	27.976	27.8019	27.6865	27.3153	27.6251	27.7833	27.2077	27.4785	27.7389	27.509	27.8324	27.3745
DCTN4	Dynactin subunit 4	Q9UJW0;Q9UJW0-3;Q9UJW0-2	27.7782	27.8815	27.9262	27.7803	27.9992	27.941		0.00211509	0.996372		0.117711	0.914189		0.0148133	0.977635			0.919444		27.7581	27.726	27.8504	27.4938	27.976	28.1747	27.9869	27.7833	28.0084	27.7195	27.976	27.726	27.6998	28.1312	27.7645	28.3494	27.7518	27.7581	28.1652	27.7645	28.0762
DCTN5	Dynactin subunit 5	H3BR94;H3BN51;Q9BTE1;H3BUD2;H3BS05;H3BQA4	26.1643	25.992	26.2477	26.2636	26.3872	26.4634		0.0992325	0.92772		0.395197	0.796714		0.215613	0.714794			0.844375		26.4346	26.0935	25.965	25.6998	26.0317	26.2445	26.2244	26.5255	25.9933	26.3511	26.6865	26.0105	26.0062	26.604	26.0772	26.8741	25.9933	26.5225	26.4473	26.5478	26.3359
DCTN6	Dynactin subunit 6	O00399;E5RK00	24.4567	24.5025	24.335	23.8282	24.408	24.2197		-0.62853	0.781783		-0.0945411	0.982121		-0.115309	0.963262			0.95166		24.632	24.2096	24.5285	24.918	23.8456	24.7441	24.6096	23.7578	24.6376	23.1853	24.2463	24.2096	23.6716	23.2494	24.6595	24.5285	25.1946	22.6266	24.7499	25.3612	24.141
DCTPP1	dCTP pyrophosphatase 1	Q9H773	23.4089	22.6606	23.3028	22.9309	23.6352	23.33		-0.477998	0.886702		0.974625	0.470806		0.0271759	0.986527			0.835039		23.4923	23.6743	23.0602	23.0465	22.7851	22.1501	23.7508	23.6431	22.5145	22.195	23.5983	21.9114	24.019	23.8385	23.3101	23.7492	23.6431	23.3376	23.7995	23.1425	23.0404
DCUN1D1	DCN1-like protein;DCN1-like protein 1	C9JVE2;Q96GG9;E7ETP2;C9J8R4;C9JRU6;C9J0B2;C9JUW4	27.7149	27.7474	27.5293	27.5587	27.7425	27.5768		-0.156209	0.861876		-0.00487487	0.996184		0.0474938	0.948704			0.885826		27.8019	27.7389	27.604	27.8741	27.4707	27.8973	27.3992	27.509	27.6798	27.3745	27.9428	27.611	27.3066	27.6663	27.7645	27.7129	27.8264	27.391	27.8682	27.5315	27.5165
DCXR	L-xylulose reductase	Q7Z4W1	27.9511	27.7173	27.8809	27.9839	27.9773	27.8964		0.0327876	0.977543		0.260025	0.823659		0.0155085	0.979783			0.937557		27.7389	28.003	28.1115	28.0608	27.4314	27.6595	27.8564	28.1065	27.6798	27.8504	27.673	27.965	28.4473	28.0349	28.2308	27.6458	27.9977	28.1747	27.7833	27.7129	27.9146
DDAH2	N(G),N(G)-dimethylarginine dimethylaminohydrolase 2	O95865;H0Y7N1;A3KGN5;Q5SSV3;Q5SRR8	27.6051	27.4423	27.6432	27.6333	27.6592	27.6246		0.0281989	0.97097		0.216951	0.608717		-0.0185396	0.96594			0.898585		27.6798	27.604	27.5315	27.5826	27.2891	27.4551	27.7389	27.4073	27.7833	27.5826	27.8858	27.7581	27.3066	27.6251	27.6527	27.6998	27.6595	27.5969	27.5609	27.7581	27.5826
DDB1	DNA damage-binding protein 1	Q16531;F5GY55;B4DZP5	29.4033	29.3475	29.406	29.4064	29.4579	29.4514		0.00312201	0.992664		0.110352	0.828234		0.0454082	0.94077			0.964546		29.3662	29.49	29.3536	29.3001	29.2913	29.4512	29.3367	29.3951	29.4862	29.4512	29.4746	29.3088	29.391	29.4746	29.3388	29.6561	29.362	29.2445	29.4823	29.3807	29.6981
DDI2	Protein DDI1 homolog 2	Q5TDH0;Q5TDH0-3;Q5TDH0-2	23.5939	23.8337	23.2621	23.4839	23.4268	24.1087		-0.110002	0.971251		-0.406992	0.895765		0.846614	0.693002			0.931576		23.3054	24.0854	23.391	23.6865	24.5638	23.2509	23.6096	23.0122	23.1644	22.4966	24.697	22.9726	23.7695	22.542	24.5105	22.4674	24.1871	24.6376	24.4041	24.5285	22.8647
DDOST	Dolichyl-diphosphooligosaccharide--protein glycosyltransferase 48 kDa subunit	P39656;E7EWT1	26.7135	26.9072	27.1331	26.1526	26.2196	26.186		-0.560963	0.845627		-0.687617	0.595493		-0.947093	0.25723			0.381954		27.0914	26.3762	26.673	26.9428	26.5711	27.2077	27.141	27.0505	27.2077	26.2077	26.0464	25.275	27.0813	26.6595	26.0874	25.9672	26.1642	26.239	25.8118	26.3762	26.317
DDT	D-dopachrome decarboxylase;D-dopachrome decarboxylase-like protein	P30046;B5MC82;B7Z522;A6NHG4	28.5042	28.3696	28.6232	28.4831	28.3539	28.4909		-0.0211159	0.985097		-0.0156948	0.992458		-0.132307	0.939478			0.994212		28.604	28.4073	28.5014	28.1842	28.6355	28.2891	28.4354	29.0889	28.3452	28.4591	28.9089	28.673	27.8916	28.6798	28.2847	28.6492	27.8019	27.9428	28.632	28.3023	29.0864
DDX1	ATP-dependent RNA helicase DDX1	Q92499;B4DME8;B4DPN6	27.8375	28.063	28.0162	28.0372	28.1026	28.0428		0.199694	0.81529		0.0396145	0.94617		0.0266722	0.951308			0.822008		27.8858	27.9202	27.7064	27.9316	28.1115	28.1459	27.8385	28.17	28.0401	28.0711	28.3023	27.9428	27.8324	28.249	28.1115	28.17	27.8799	27.9539	28.0711	28.1115	28.0349
DDX19A	ATP-dependent RNA helicase DDX19A	Q9NUU7;I3L0H8;F8W9W5;I3L352;B4DRZ7	23.0948	23.9075	21.8629	22.793	23.1579	23.0121		-0.301743	0.907954		-0.749594	0.828192		1.14925	0.670819			0.633517		22.4428	23.5479	23.2936	22.9915	23.7796	24.9514	21.4784	22.2114	21.8989	23.8152	22.7676	22.2442	22.3451	23.6201	22.1028	23.5672	23.3414	21.54	24.0903	23.0826	23.3358
DDX19B	ATP-dependent RNA helicase DDX19B	Q9UMR2;H3BQK0;Q9UMR2-2;E7EMK4;H3BN59;Q9UMR2-3	26.6602	26.7187	26.8171	26.9516	26.9062	27.0561		0.29135	0.858373		0.187545	0.857319		0.23899	0.513459			0.900513		26.3645	26.8019	26.8142	26.3926	26.7129	27.0505	26.8973	26.7645	26.7895	27.0711	27.2891	27.189	26.2571	27.2077	26.726	27.1015	26.5898	26.9316	27.1312	26.9539	27.2077
DDX3X	ATP-dependent RNA helicase DDX3X	O00571-2;O00571;B4DLU5	28.3495	28.4923	28.4274	28.4073	28.435	28.4585		0.0578369	0.917047		-0.057244	0.932744		0.0311395	0.945944			0.972271		28.2625	28.4073	28.3787	28.3494	28.341	28.7864	28.3494	28.5499	28.3828	28.5014	28.5426	28.4394	28.1459	28.5754	28.4073	28.3023	28.4551	28.3578	28.509	28.5969	28.3704
DDX6	Probable ATP-dependent RNA helicase DDX6	P26196	27.4999	27.4971	27.5127	27.5124	27.6861	27.6639		0.0124898	0.955955		0.188999	0.856538		0.151229	0.702214			0.915823		27.4073	27.5609	27.5315	27.2535	27.4862	27.7518	27.4394	27.509	27.5898	27.524	27.5609	27.4862	27.4785	28.0608	27.8324	27.6251	27.2262	27.6931	27.8324	27.4707	27.6595
DECR1	2,4-dienoyl-CoA reductase, mitochondrial	B7Z6B8;Q16698;E5RJG7;E5RFV2	27.7766	28.3089	28.3015	28.5546	28.6641	28.5141		0.778005	0.526184		0.35518	0.614872		0.21264	0.693706		+	0.0220128		27.8623	27.6595	27.8081	28.3828	28.341	28.203	28.2714	28.5165	28.1164	28.5014	28.3282	28.509	28.8799	28.9089	28.6285	28.6561	28.4629	28.5826	28.4154	28.3787	28.6798
DEF6	Differentially expressed in FDCP 6 homolog	Q9H4E7;F5H853	22.6413	23.7401	22.4692	23.26	23.9177	23.6703		0.618712	0.817096		0.177531	0.869811		0	0			0.666943		22.7388	22.4687	22.7165	23.5551	23.9495	23.7158	22.5594	22.073	22.7751	24.0359	23.7995	22.7107	22.494	23.3781	24.2788	24.1095	23.9043	22.1284	23.9406	23.0073	25.6051
DENND2C	DENN domain-containing protein 2C	Q68D51;C9JPG4;Q68D51-2;Q68D51-3	26.4409	26.5149	26.1569	26.4938	26.1796	26.5005		0.0528363	0.956415		-0.33527	0.843316		0.343663	0.601736			0.860451		26.5522	26.7389	26.0317	26.604	26.5448	26.3959	26.0127	26.3545	26.1035	26.4583	26.6998	26.4425	26.3745	26.2803	26.2891	25.4362	26.7129	26.1719	26.632	26.4723	26.726
DENND3	DENN domain-containing protein 3	E9PF32;H0YAY3;A2RUS2;A2RUS2-2	28.7433	28.7364	28.7826	28.8674	28.9028	28.9171		0.124107	0.816338		0.166361	0.804722		0.134552	0.696725			0.815149		28.6831	28.7357	28.8112	28.6697	28.6251	28.9146	28.8829	28.7227	28.7421	28.6865	29.0322	28.8858	28.8653	29.0583	28.6764	28.9705	28.906	28.7676	28.9923	28.8712	29.0375
DENND4A	C-myc promoter-binding protein	Q7Z401;E7EPL3;H3BTW5	25.8475	25.7835	25.6676	25.9175	25.9753	25.8837		0.0700059	0.923069		0.19183	0.838785		0.216049	0.650804			0.848848		25.8552	25.7312	25.9562	25.8264	25.4862	26.038	25.673	25.6595	25.6703	26.2408	25.8811	25.6811	25.867	26.0711	26.0691	26.0588	25.7024	25.8044	25.7364	25.824	26.17
DENND4C	DENN domain-containing protein 4C	Q5VZ89;Q5VZ89-6;Q5VZ89-5;Q5VZ89-2;B7Z660	24.8647	24.7397	25.5036	25.5231	25.3029	25.5795		0.658407	0.851723		0.563217	0.845319		0.0759249	0.885497			0.902126		23.2533	25.8093	25.5315	23.2254	25.3342	25.6595	25.7645	25.2571	25.4892	25.5696	25.6068	25.4298	25.4862	25.6431	25.2463	24.9847	25.3376	25.6125	25.5841	25.5812	25.5404
DENR	Density-regulated protein	F8VVL1;O43583	26.3709	25.9126	25.8497	26.1211	25.7563	25.989		-0.249841	0.880153		-0.156326	0.928133		0.13939	0.953295			0.921267		26.0752	26.5653	26.4723	25.9955	26.3712	25.3712	25.8191	25.4425	26.2874	26.8385	25.8191	25.9225	25.9043	25.1946	26.2714	25.6209	25.9383	26.53	25.558	26.7389	25.1293
DERA	Deoxyribose-phosphate aldolase	Q9Y315;E9PPM8;G3V158	27.5229	27.5846	27.6749	27.5038	27.5654	27.5703		-0.0191301	0.970996		-0.0191342	0.987493		-0.104671	0.768447			0.937024		27.3828	27.6998	27.4862	27.4394	27.5754	27.7389	27.7195	27.6527	27.6527	27.4785	27.6389	27.5315	27.3662	27.8385	27.3992	27.6663	27.3578	27.4862	27.6798	27.4154	27.6998
DGKA	Diacylglycerol kinase alpha;Diacylglycerol kinase	P23743;G3V4E1	26.5204	26.4374	26.1455	26.3758	26.3258	26.4297		-0.14459	0.897654		-0.111588	0.842552		0.284214	0.463939			0.816695		26.4723	26.6865	26.4024	26.4441	26.2499	26.6181	26.0567	26.1965	26.1833	26.5344	26.7129	26.3562	25.8997	26.3844	26.189	26.2714	26.4583	26.4614	26.604	26.2856	26.3679
DGKG	Diacylglycerol kinase gamma	P49619-3;P49619;H0YGX1;F5GX27;P49619-2	27.8129	27.647	27.789	27.8239	27.5473	27.521		0.0110612	0.985581		-0.0996706	0.881313		-0.267957	0.696124			0.690327		27.7389	27.8916	27.8081	27.5463	27.8264	27.5682	28.003	27.6251	27.7389	27.9089	28.0453	27.7518	27.5898	27.7129	27.726	27.524	27.2262	27.4154	27.8203	27.2803	27.5682
DGKH	Diacylglycerol kinase eta	B4DZ34;Q86XP1-3;Q86XP1-2;Q86XP1;F5GYP2	23.8959	24.5547	24.1499	24.6696	23.6194	24.6325		0.773717	0.858727		-0.935328	0.711739		0.48258	0.772486			0.836154		21.8983	25.0401	24.7492	24.6096	24.6376	24.417	23.3632	24.7695	24.317	24.7492	24.4738	24.6757	24.7796	24.6376	23.0139	23.7501	23.076	24.4234	24.3376	25.1095	24.6595
DGKZ	Diacylglycerol kinase;Diacylglycerol kinase zeta	E9PNL8;A8MVN1;B7Z6M3;Q13574-2;G3V0F6;E9PPW4;Q13574-3;Q13574	22.764	23.1851	23.1989	22.9197	22.9957	23.4973		0.155718	0.958787		-0.189385	0.946821		0.298477	0.886504			0.932725		23.1479	21.7795	23.3645	23.2532	23.1496	23.1525	23.4151	22.3537	23.8278	23.5465	22.6355	22.2146	23.2821	22.9529	21.9996	24.1569	22.8735	23.9263	24.0172	23.0348	23.0111
DHRS4	Dehydrogenase/reductase SDR family member 4	Q9BTZ2;E2QRL8;Q9BTZ2-4	24.1138	24.635	22.844	25.0963	25.1458	24.0848		0.982434	0.817214		0.51083	0.845463		1.24074	0.64948			0.410708		24.0486	22.7089	25.5841	25.2207	25.3135	23.3707	22.9403	23.0841	22.5076	25.5135	25.1015	24.8385	24.9316	25.824	24.8191	24.867	25.0732	23.7739	24.6811	22.7007	25.1833
DHRS7	Dehydrogenase/reductase SDR family member 7	F8W9Q4;H0YJ66;Q9Y394-2;Q9Y394;H0YJE4	24.9522	25.0661	25.6321	23.677	24.0843	24.9774		-1.27516	0.810845		-0.981861	0.736228		-0.654631	0.443434			0.450671		25.0608	24.6703	25.1253	25.2133	25.0401	24.945	25.3031	26.038	25.5551	22.4213	22.5049	24.4041	25.3778	24.0369	24.427	22.9326	24.9406	24.8142	25.0359	24.9225	25.1371
DHX29	ATP-dependent RNA helicase DHX29	Q7Z478	27.3966	27.4268	27.277	27.5214	27.6639	27.5733		0.124844	0.880007		0.237185	0.735346		0.296234	0.65151			0.701666		27.3325	27.5682	27.2891	27.2354	27.5898	27.4551	27.2445	27.3153	27.2714	27.189	27.6458	27.7195	27.5315	27.8504	27.4938	27.6865	27.6251	27.5969	27.8682	27.217	27.611
DIABLO	Diablo homolog, mitochondrial	Q9NR28-2;Q9NR28;F5H796;F5GX50;F5GYH3;F5GXT8;H7BZK7;Q9NR28-3	25.9379	26.0581	25.7902	26.4057	26.2852	26.3312		0.467842	0.782841		0.227008	0.845588		0.541014	0.519901			0.471445		25.6622	26.0359	26.1154	26.3712	25.6181	26.1852	25.9293	25.9428	25.4984	26.4815	26.6181	26.4831	26.0401	26.1115	26.452	26.3844	26.1927	26.1604	26.1135	26.6998	26.3511
DIAPH1	Protein diaphanous homolog 1	B9ZVX0;E9PHQ0;E7ET75;E9PEZ3;H9KV28;O60610-2;E9PEZ2;O60610;E7ERW8;E7EMV0	32.1771	32.0478	32.0291	32.2826	32.3303	32.3668		0.105528	0.870398		0.28247	0.551729		0.337701	0.513969			0.411961		32.0017	32.4654	32.0641	31.9188	32.1931	32.0316	31.7849	32.2842	32.0184	32.3196	32.2786	32.2507	32.2814	32.3931	32.245	32.2647	32.4184	32.341	32.2924	32.3956	32.4384
DIS3L2	DIS3-like exonuclease 2	F5H051;F5H291;Q8IYB7-3;Q8IYB7-2;Q8IYB7	23.7308	23.4406	23.0648	23.8239	23.6211	24.0855		0.0930835	0.957203		0.18055	0.924038		1.0207	0.280389			0.62239		24.2463	23.4649	23.4812	24.019	22.8813	23.4215	23.2864	23.1806	22.7274	23.7075	24.152	24.2678	23.1683	23.2673	24.0935	24.0359	23.0879	23.9672	24.0772	24.2607	24.0369
DLD	Dihydrolipoyl dehydrogenase, mitochondrial;Dihydrolipoyl dehydrogenase	F5H4I0;P09622;E9PEX6;B4DT69;B4DHG0	26.2844	26.8837	26.7972	26.6429	26.9813	26.8435		0.358442	0.834956		0.0975205	0.914227		0.046282	0.909454			0.540293		26.4614	26.4785	25.9134	27.2803	26.632	26.7389	26.8504	26.7895	26.7518	26.9428	26.17	26.4186	27.0401	26.976	27.0084	27.189	26.7518	26.8142	27.019	26.632	26.9089
DLGAP4	Disks large-associated protein 4	Q9Y2H0-3;Q9Y2H0-1;Q9Y2H0;F8WF49	25.7747	25.7505	25.6891	25.9833	25.8801	25.6881		0.208658	0.808466		0.129611	0.912164		-0.000977834	0.999705			0.922601		25.767	25.9672	25.5898	25.1604	25.9539	26.1371	25.2133	25.9248	25.9293	26.019	25.9539	25.8409	26.1194	25.8927	25.9406	25.7024	25.9847	25.6292	25.6703	25.3376	26.1154
DLST	Dihydrolipoyllysine-residue succinyltransferase component of 2-oxoglutarate dehydrogenase complex, mitochondrial	P36957;B7Z5W8	23.9776	24.5244	24.5675	24.3693	24.629	24.6473		0.391677	0.898049		0.104586	0.92037		0.0797523	0.952616			0.913649		22.8201	24.4862	24.6264	24.7389	24.5522	24.2821	24.2821	25.1527	24.2678	25.0062	23.4847	24.3376	24.6486	25.0443	24.3376	24.7695	24.3645	24.3443	24.7286	24.8191	24.6971
DMD	Dystrophin	P11532-4;P11532;F5GZT3;H0YFQ3;F5H6K1;P11532-3;P11532-2	26.2558	26.276	25.3404	25.2431	26.0403	25.5486		-1.01271	0.931966		-0.235661	0.986717		0.208224	0.979881			1		28.3452	27.6595	22.7627	21.8461	27.9814	29.0004	27.8385	22.9148	25.2678	28.2445	27.7129	23.079	21.9359	23.4577	28.1747	27.6865	24.8423	23.9182	21.9999	28.1015	28.1747
DMTN	Dematin	Q08495;B4DI75;E5RJ56;E5RIE7;E9PD40;E5RIG5;E5RGQ0	30.5597	30.5058	30.6109	30.6235	30.5985	30.6283		0.0637962	0.898898		0.09269	0.855261		0.0173443	0.95908			0.95419		30.7453	30.4134	30.5203	30.6372	30.2869	30.5934	30.7129	30.4234	30.6964	30.6544	30.7453	30.4919	30.6022	30.4629	30.5844	30.7533	30.5934	30.611	30.6629	30.6458	30.5934
DNAJA1	DnaJ homolog subfamily A member 1	P31689	26.0847	26.0425	25.6691	26.0289	26.1244	26.3536		-0.0558133	0.966061		0.0819008	0.923588		0.68446	0.266549			0.579478		26.0874	26.0296	26.1371	26.2133	25.9406	25.9738	25.772	25.6891	25.5463	25.8694	26.518	25.5075	26.2207	26.1449	25.965	25.8623	26.5255	26.2714	26.1371	26.5014	26.5045
DNAJA2	DnaJ homolog subfamily A member 2	O60884	27.6254	27.5087	27.7636	28.0049	27.8103	27.6958		0.379549	0.797279		0.301629	0.28818		-0.0678267	0.835742			0.379933		27.391	27.8741	27.611	27.5165	27.5389	27.4707	27.8916	27.7195	27.6798	28.341	28.1312	27.7958	27.7518	27.6798	27.8504	27.9031	27.8081	27.7518	27.7958	27.6458	27.5898
DNAJB1	DnaJ homolog subfamily B member 1	B4DX52;P25685	26.0518	26.1199	25.9726	25.9946	25.9549	25.9727		-0.0572001	0.962162		-0.164972	0.849602		0.000172456	0.999322			0.99113		26.1115	25.6237	26.4202	25.8069	26.1984	26.3545	26.0732	25.895	25.9495	25.9517	26.038	26.0127	25.976	26.0338	25.7871	26.2625	25.7364	25.9584	26.1055	25.7077	26.1194
DNAJB11	DnaJ homolog subfamily B member 11	Q9UBS4;H7C2Y5	24.8452	26.1572	25.9328	25.84	26.0504	25.0215		0.994828	0.847085		-0.106833	0.943394		-0.911242	0.819687			0.853748		26.067	22.7875	25.6811	26.1507	26.0127	26.3084	26.0874	25.4008	26.3101	25.9066	26.2207	25.6403	25.5926	26.4831	25.6486	26.3943	25.6757	25.8069	25.7103	22.6328	25.9361
DNAJB2	DnaJ homolog subfamily B member 2	P25686;P25686-2;C9JRD2;C9JXB9	26.4931	26.5926	26.7129	26.8302	26.5832	26.5471		0.337151	0.825148		-0.00933409	0.992098		-0.165742	0.696573			0.818005		26.4908	26.2114	26.7771	26.4551	26.4138	26.9089	26.6998	26.7129	26.726	26.965	26.9316	26.9428	26.4815	26.417	26.632	26.7645	26.5195	26.574	26.6865	26.2961	26.632
DNAJC10	DnaJ homolog subfamily C member 10	Q8IXB1;F8W884;Q8IXB1-2	25.5836	25.3195	25.3653	25.505	25.5864	25.3926		-0.0785478	0.920861		0.26695	0.747304		0.0272292	0.964957			0.843855		25.4923	25.6209	25.6376	25.2678	25.391	25.2996	25.0935	25.5225	25.48	25.417	25.6181	25.8093	25.1757	25.7871	25.4551	25.797	25.3066	25.4041	25.6237	25.2499	25.2926
DNAJC13	DnaJ homolog subfamily C member 13	O75165	26.1204	26.1071	26.1773	26.3039	26.2633	26.4877		0.183527	0.852561		0.156227	0.884392		0.310358	0.654026			0.85791		26.1253	26.1585	26.0772	25.9738	26.0975	26.2499	25.9869	26.5029	26.0422	26.4154	26.673	26.1776	25.9495	26.7518	25.7441	26.3477	26.2096	26.425	26.5492	26.317	26.6595
DNAJC3	DnaJ homolog subfamily C member 3	Q13217	28.0075	28.105	28.2348	28.1646	27.884	27.9902		0.157052	0.848793		-0.220985	0.832374		-0.244578	0.483719			0.770431		28.2123	28.0084	27.8019	28.0608	27.9259	28.3282	28.362	28.1115	28.2308	28.4629	28.0505	28.0137	28.1312	27.7453	27.6527	28.2935	27.8445	28.0608	27.8799	28.066	27.9539
DNAJC6	Putative tyrosine-protein phosphatase auxilin	D3DQ66;O75061;O75061-2;O75061-3	23.7367	23.4882	23.3231	24.3695	23.6304	24.4241		0.632738	0.892501		0.142138	0.987927		1.101	0.797961			0.938839		24.7895	24.6703	21.7503	24.7796	23.0428	22.6423	25.1371	23.244	21.5883	24.7945	24.4676	23.8919	24.3239	25.141	22.9356	24.4425	22.0022	24.417	24.7695	25.4984	23.0117
DNAJC7	DnaJ homolog subfamily C member 7	Q99615;Q7Z784	26.1756	26.0937	26.1366	25.7538	25.7743	25.8029		-0.42179	0.846061		-0.31935	0.915972		-0.333706	0.886942			0.985285		25.7619	26.1055	26.6595	26.4041	25.5463	26.3307	26.632	25.4923	26.2856	26.0854	25.2354	26.2553	25.4394	24.6096	27.1115	25.3679	26.0084	26.0935	24.6431	26.1738	26.3014
DNAJC8	DnaJ homolog subfamily C member 8	O75937	22.9804	23.0161	23.0226	23.2845	23.2821	23.4552		0.304088	0.932183		0.266008	0.923103		0.432649	0.693363			0.989667		22.2945	24.1057	22.541	22.3297	23.017	23.7017	23.1701	22.8727	23.025	23.7525	23.8481	23.5824	21.955	24.4306	22.521	23.3149	22.8619	23.3141	22.9436	23.9584	23.6049
DNAJC9	DnaJ homolog subfamily C member 9	Q8WXX5	24.9461	25.1414	24.9374	25.0652	25.0865	25.15		0.11915	0.959271		-0.054958	0.953219		0.21262	0.709501			0.991406		24.8142	24.5165	25.5075	25.2463	25.2021	24.976	24.7995	24.7846	25.228	24.9584	25.2499	25.6292	24.4234	25.3376	25.0275	25.2317	24.7492	25.2354	25.0935	24.989	25.2821
DNM1	Dynamin-1	Q05193-3;Q05193-4;Q05193;Q05193-5;Q05193-2;F8W9W1	28.129	28.1961	28.3307	28.3855	28.4119	28.5304		0.25657	0.761585		0.215732	0.846784		0.199663	0.697549			0.680289		28.1795	28.1937	28.0137	27.8564	28.2847	28.4473	28.5463	28.17	28.2759	28.2399	28.632	28.4032	28.267	28.5969	28.3153	28.604	28.1312	28.3239	28.579	28.604	28.6146
DNM2	Dynamin-2	P50570;P50570-2	30.4163	30.2781	30.425	30.3387	30.3795	30.4678		-0.0775104	0.812771		0.101377	0.858686		0.0428096	0.93673			0.892212		30.3724	30.4134	30.4629	30.1361	30.2647	30.4334	30.4433	30.5014	30.3303	30.2535	30.4532	30.3724	30.2759	30.362	30.1724	30.611	30.3724	30.4234	30.5203	30.2647	30.6629
DNM3	Dynamin-3	Q9UQ16-2;Q9UQ16-3;C9JXE5;Q9UQ16;Q9UQ16-4;E5RHK8;Q6P2G1;E5RIK2	28.7169	28.5154	28.4811	28.5138	28.5538	28.6565		-0.203114	0.824507		0.0383073	0.97492		0.175437	0.788647			0.915563		28.7096	28.8264	28.6146	28.5934	28.3704	28.5826	28.5128	28.6458	28.2847	28.4234	28.2891	28.6527	28.6898	28.4785	28.2216	28.9288	28.5862	28.4473	28.49	28.8504	28.8385
DNPEP	Aspartyl aminopeptidase	E7ETB3;Q9ULA0;H0YGP0;E7EMB6;E7EWP4	25.8644	25.9411	26.0035	26.0207	26.1354	26.198		0.156219	0.884116		0.194365	0.829665		0.194502	0.786425			0.877736		25.6838	25.8528	26.0567	25.9043	25.965	25.9539	26.1488	26.1565	25.705	26.3118	26.2535	25.7129	25.8044	26.5105	26.1565	26.0338	25.8409	26.2096	26.3861	25.9248	26.2714
DOCK10	Dedicator of cytokinesis protein 10	B3FL70;Q96BY6	28.2569	28.127	28.0463	28.116	28.1459	28.1322		-0.140864	0.860515		0.0189117	0.981589		0.0858657	0.792212			0.920469		28.249	28.524	27.9977	28.0243	28.2803	28.0762	28.1459	28.1015	27.8916	27.9595	28.2803	28.1842	28.0401	28.2891	27.9259	28.1937	28.1747	28.0864	28.1795	28.0505	28.2123
DOCK11	Dedicator of cytokinesis protein 11	A6NIW2;Q5JSL3	27.8896	27.612	27.7653	27.8923	27.884	27.7923		0.00268221	0.997902		0.271945	0.766734		0.027027	0.968356			0.88565		27.8858	27.8973	27.8858	27.5315	27.4073	27.8973	27.4234	27.8324	28.0401	27.8799	27.8385	27.7645	28.0864	28.1747	27.7389	27.8142	27.8081	27.9814	27.8142	27.4938	27.8799
DOCK5	Dedicator of cytokinesis protein 5	Q9H7D0;H0Y7N4	27.6977	27.4097	27.526	27.7534	27.7077	27.557		0.0557421	0.956236		0.298064	0.528501		0.0310671	0.973152			0.851853		27.4785	27.7581	27.8564	27.3239	27.3662	27.5389	27.1507	27.9031	27.524	27.5969	27.9372	27.509	27.9705	27.6998	27.632	27.8741	27.6251	27.5682	27.7833	27.1312	27.7453
DOCK7	Dedicator of cytokinesis protein 7	Q96N67-4;Q96N67-3;Q96N67-5;Q96N67-2;Q96N67-6;Q96N67;H0Y7L2	26.0656	25.9501	26.0711	26.0136	26.239	26.1062		-0.0520601	0.966167		0.288892	0.617873		0.0351481	0.958918			0.91612		25.772	26.0338	26.391	26.0401	25.8019	26.0084	26.2021	25.8623	26.1488	25.6209	26.341	25.8997	26.1927	26.391	26.0874	26.2589	26.2188	25.8481	26.3894	25.9539	26.2335
DOCK8	Dedicator of cytokinesis protein 8	E9PH09;Q8NF50-3;Q8NF50-2;Q8NF50;F8W9H3;A2A369	28.4239	28.3966	28.4332	28.4717	28.5068	28.4414		0.0477894	0.920073		0.1102	0.840983		0.00813182	0.985883			0.982988		28.3023	28.6075	28.362	28.362	28.3494	28.4785	28.3494	28.5389	28.4113	28.3282	28.5682	28.5315	28.4591	28.4113	28.3109	28.673	28.632	28.267	28.6181	28.3452	28.5352
DOK1	Docking protein 1	Q99704;Q99704-3	32.9318	33.0272	32.951	32.9304	32.8843	32.8745		-0.00147851	0.997533		-0.142943	0.775154		-0.0764914	0.742155			0.891714		33.0657	32.9295	32.8004	32.9224	32.9574	33.2019	32.9609	32.8737	33.0184	32.8991	33.0641	32.933	32.8252	32.9967	32.846	32.9312	32.7633	32.7731	32.9591	32.8792	32.8865
DOK2	Docking protein 2	O60496;E5RJ11	29.4484	29.6777	29.6296	29.6473	29.4997	29.5881		0.198909	0.81857		-0.177922	0.837697		-0.0414837	0.9063			0.893433		29.3599	29.3724	29.6128	29.391	29.837	29.805	29.5628	29.6181	29.708	29.6915	29.7755	29.7771	29.3452	29.5664	29.4976	29.6814	29.2535	29.5481	29.7502	29.4274	29.6268
DOK3	Docking protein 3	D6RAM3;Q7L591;D6RC22	30.18	30.259	30.2316	30.2197	30.1189	30.2229		0.0397236	0.942104		-0.140165	0.817068		-0.00872978	0.987214			0.961227		30.2193	30.1483	30.1724	30.099	30.2647	30.4134	30.2308	30.0608	30.4032	30.1361	30.3828	30.3515	30.0084	30.2979	29.9677	30.1361	30.0737	30.0479	30.1483	30.2422	30.4532
DPP3	Dipeptidyl peptidase 3	Q9NY33;G3V1D3;G3V180;F5H8L6;F5GXD5	28.8227	29.1105	28.9675	29.0171	28.907	29.1168		0.19435	0.747109		-0.203569	0.617115		0.149338	0.796716			0.549362		28.8355	28.7325	28.9002	29.1263	29.0401	29.1652	29.0479	28.6798	29.1747	29.0427	29.1361	28.995	28.8945	29.0217	28.8504	28.9787	28.7771	29.0889	29.1115	28.9977	29.2692
DPP7	Dipeptidyl peptidase 2	Q9UHL4	26.0415	26.2578	26.5683	26.5386	26.5283	26.4267		0.497122	0.785678		0.270481	0.809436		-0.141651	0.817755			0.670942		26.3728	26.0894	25.6622	26.4202	26.2678	26.0854	26.6595	26.3861	26.6595	26.6181	26.2678	26.3712	26.8973	26.9428	26.5898	26.1604	26.4202	26.3959	26.3239	26.2481	26.7389
DPP9	Dipeptidyl peptidase 9	Q86TI2;Q86TI2-2;Q86TI2-4;Q86TI2-3;H7BYF3;Q86TI2-5	26.2785	26.0356	25.8919	26.0246	26.1167	26.2594		-0.253854	0.819412		0.0810719	0.848071		0.367425	0.529416			0.679157		25.9406	26.6181	26.2767	26.1642	25.945	25.9977	25.8409	26.1194	25.7156	26.0211	25.8361	25.9716	26.2696	25.9977	26.0894	26.2944	26.0854	26.4186	26.0732	26.1352	26.4105
DPYD	Dihydropyrimidine dehydrogenase [NADP(+)]	Q12882	27.279	26.9399	26.8334	26.8949	26.9783	26.9813		-0.384024	0.757215		0.0384294	0.975415		0.147894	0.887734			0.851385		27.1015	27.4551	27.2803	26.9202	27.0608	26.8385	26.965	26.8623	26.673	26.9202	27.1984	26.8858	26.5754	27.2891	26.5898	26.9428	27.0914	26.4692	26.8623	27.2445	27.3494
DPYSL2	Dihydropyrimidinase-related protein 2	Q16555;B4DR31	30.9758	31.1102	31.1055	30.9678	31.0865	31.0636		-0.00803741	0.992609		-0.0236959	0.983795		-0.0418046	0.94571			0.943045		31.13	31.0283	30.7692	31.0283	31.1239	31.1783	31.2077	31.0414	31.0673	30.8385	31.0737	31.1664	30.7927	31.0673	31.0217	31.4184	30.8385	30.8459	31.0017	31.1422	31.2647
DRG2	Developmentally-regulated GTP-binding protein 2	P55039;A8MZF9	25.3542	24.8143	25.2274	25.3093	25.1832	24.9717		-0.0449694	0.966884		0.36888	0.624959		-0.255735	0.71238			0.543811		25.0935	25.48	25.4892	24.7945	24.6209	25.0275	25.0105	25.3307	25.341	25.5195	25.6264	25.1371	24.9539	25.1984	25.1908	25.3545	24.989	24.8433	25.0484	24.7129	25.2821
DSCR3	Down syndrome critical region protein 3	A8MTY9;O14972;B7Z6B1;H7C5I8;A8MY26;B7Z606;E7EWN9	23.845	24.4416	24.3481	24.797	24.4944	24.4183		0.952042	0.806973		0.0528345	0.950949		0.0701421	0.954457			0.752392		22.7012	24.0443	24.7895	24.6595	24.1015	24.5638	24.5225	24.5285	23.9933	24.8997	24.8044	24.5983	24.8858	24.5105	24.3975	24.6209	24.4488	24.4984	24.8093	24.4041	23.9613
DST	Dystonin	F8W9J4;Q03001;E7ERU0;E7ERU2;E9PEB9;E9PHM6;Q03001-8	25.7491	24.1796	24.9886	23.6652	23.4466	24.0882		-2.08389	0.681716		-0.733033	0.859878		-0.900414	0.788927			0.594132		26.1965	25.4105	25.6403	22.8637	24.1526	25.5225	24.1401	25.6125	25.2133	24.8287	22.5187	23.7395	23.5741	23.2362	25.1253	22.3441	23.0808	25.8264	23.3713	23.5886	23.5665
DSTN	Destrin	P60981;P60981-2;F6RFD5	30.548	30.5988	30.7185	30.7268	30.8643	30.7655		0.178824	0.847557		0.265519	0.610138		0.0470436	0.89653			0.68039		30.6372	30.5934	30.4134	30.5481	30.6285	30.6198	30.6372	30.8385	30.6798	30.4433	30.9677	30.9117	30.5844	30.9046	31.0544	30.7692	30.7292	30.8004	30.9046	30.6198	30.7373
DTNBP1	Dysbindin	A6NFV8;Q96EV8;F5GY46;Q96EV8-2;D6RCT8	24.0566	24.1981	23.2561	23.7945	23.6252	23.6427		-0.262107	0.920473		-0.572952	0.860021		0.38667	0.884474			0.935766		24.2607	24.1946	23.7145	23.8288	24.368	24.3975	23.0346	24.1015	22.6321	23.494	24.5614	22.6612	24.4614	21.806	24.0105	24.4234	24.2607	22.6193	24.3443	24.2317	23.3756
DTX3L	E3 ubiquitin-protein ligase DTX3L	Q8TDB6	24.4959	24.4756	24.5726	24.5621	23.943	24.5442		0.0662416	0.961806		-0.532583	0.809145		-0.0284351	0.965821			0.711796		24.2463	24.6431	24.5983	24.3101	24.7389	24.3778	24.2607	24.7338	24.7234	24.1174	24.6209	24.9406	24.5696	24.569	24.1871	23.0401	23.976	24.6209	24.4105	24.391	24.7543
DTYMK	Thymidylate kinase	P23919;H7C312	27.7384	27.5662	27.7883	27.8714	27.6615	27.5652		0.133031	0.846773		0.0953147	0.895708		-0.223121	0.840675			0.892373		27.6931	27.7325	27.7895	27.673	27.524	27.5014	27.7581	27.9202	27.6865	28.0813	27.604	27.8858	27.9146	28.0505	27.611	27.4234	27.5609	27.4473	27.2077	27.4073	28.1984
DUSP22	Dual specificity protein phosphatase 22	Q9NRW4;Q9NRW4-2	26.2647	26.003	26.067	26.2196	25.9525	26.0873		-0.0451137	0.970813		-0.0505296	0.977179		0.0203671	0.97522			0.918002		26.1253	26.5433	26.1253	25.6181	26.1927	26.1984	25.989	26.2535	25.9584	26.3135	26.6595	26.0148	25.8904	25.8528	25.8528	25.673	26.4314	26.4692	25.8764	26.019	25.9847
DUSP23	Dual specificity protein phosphatase 23	Q9BVJ7	26.4204	26.4815	26.4719	26.505	26.6774	26.5789		0.0845211	0.958805		0.195945	0.871845		0.107007	0.888264			0.983333		25.767	26.632	26.8623	25.8904	26.7645	26.7895	26.1253	26.6865	26.604	26.5419	26.5165	26.6865	26.275	26.7518	26.433	26.8385	26.6865	26.4953	26.5754	26.4186	26.8264
DUSP3	Dual specificity protein phosphatase 3	P51452;Q8IYJ9	30.9222	31.0278	31.1336	30.9522	31.0797	31.1339		0.030005	0.971163		0.051847	0.933849		0.000365257	1			0.914211		31.0349	30.947	30.7849	30.9539	31.225	30.9046	31.0414	31.2478	31.1115	30.8081	31.2308	31.0737	30.6964	31.1177	30.8829	31.2703	31.0479	31.015	31.4334	30.8004	31.2869
DYM	Dymeclin	Q7RTS9;Q7RTS9-2	24.327	23.6861	24.0768	23.4769	23.9879	23.6564		-0.850131	0.786162		0.30184	0.870845		-0.420431	0.794003			0.838221		24.0691	24.7024	24.2096	23.9584	23.1773	23.9225	23.8288	24.2607	24.141	23.2678	22.6098	23.8811	24.1488	23.6791	23.3647	24.1332	24.7746	22.7834	23.5795	24.1613	24.1015
DYNC1H1	Cytoplasmic dynein 1 heavy chain 1	Q14204	30.0595	29.9849	30.0074	29.9697	30.0459	30.0864		-0.0897902	0.914228		0.0609776	0.965229		0.0789569	0.948672			1		29.7802	30.1115	30.2869	29.6441	29.8973	30.4134	29.7064	29.9539	30.362	29.8188	30.1239	29.788	30.1483	30.1115	29.8593	29.9259	30.2869	29.8203	30.1604	29.9117	30.4532
DYNC1I2	Cytoplasmic dynein 1 intermediate chain 2	F8W8S0;Q13409-6;Q13409-3;B7ZA04;Q13409-2;Q13409-5;Q13409;E7EQL5;E7ET01;E7ETL8;E7EQU2;E7ESD3;E7EMU4;E7EV09	24.3987	24.8657	24.7752	24.1963	24.6325	23.4138		-0.202309	0.914264		-0.233243	0.923552		-1.36144	0.532889			0.55097		24.4488	24.1488	24.5983	24.4425	25.1527	25.002	24.6209	24.3844	25.3205	23.2669	24.4889	24.3975	24.632	23.4155	25.1833	24.7746	25.1565	24.0691	23.2552	22.3296	24.0014
DYNC1LI1	Cytoplasmic dynein 1 light intermediate chain 1	Q9Y6G9;E9PHI6	27.0067	26.8748	26.8142	26.7931	26.8468	26.7486		-0.213661	0.757539		-0.0280256	0.984324		-0.0656238	0.937163			0.915891		26.8504	27.1507	27.019	26.604	27.17	26.8504	26.8142	26.8142	26.8142	26.6865	26.8741	26.726	26.8858	26.604	26.7771	27.0084	26.9977	26.4488	27.019	26.5725	26.9539
DYNC2H1	Cytoplasmic dynein 2 heavy chain 1	Q8NCM8;Q8NCM8-2;Q49AI6	24.8116	23.7604	25.4013	23.1437	24.8252	23.554		-1.66789	0.811313		1.06483	0.856238		-1.84727	0.689323			0.846935		25.6838	22.9466	25.8044	24.2289	21.1095	25.9428	25.8858	26.1332	24.1848	21.8504	24.0182	22.0741	24.632	24.9945	25.6513	23.1629	25.4923	26.065	22.8425	22.2484	23.06
DYNLL1	Dynein light chain 1, cytoplasmic	P63167	30.0611	30.1064	30.132	30.2362	30.2203	30.3027		0.175083	0.816547		0.113905	0.877626		0.17071	0.85494			0.924286		29.8309	30.099	30.2535	29.8188	30.0084	30.4919	29.9117	30.2308	30.2535	30.393	30.1483	30.1842	30.2193	30.2759	30.099	30.2193	30.2869	29.995	30.5481	30.6198	30.0479
DYNLL2	Dynein light chain 2, cytoplasmic	Q96FJ2	25.7912	26.3024	26.0295	24.8916	25.9355	25.9185		-0.899542	0.852058		-0.366934	0.746733		-0.111016	0.910205			0.738991		25.8504	25.8717	25.6513	26.3273	26.1661	26.4138	26.0813	25.7024	26.3049	26.3066	26.0793	24.0407	23.1398	25.7156	25.7871	25.792	26.4473	25.6068	25.6784	26.1371	26.2517
DYNLRB1	Dynein light chain roadblock-type 1;Dynein light chain roadblock-type 2	B4DFR2;Q9NP97;B1AKR6;Q8TF09	25.3673	23.865	24.6244	26.1153	25.9442	25.1833		0.748055	0.819077		2.07924	0.681246		0.558938	0.909455			0.751085		26.0588	26.019	24.024	22.2156	25.9361	23.4434	25.6944	25.5315	22.6473	26.2553	26.3728	25.8904	25.9428	25.8717	26.1154	25.8336	25.9562	25.8552	25.7995	22.9613	26.1174
DYRK1A	Dual specificity tyrosine-phosphorylation-regulated kinase 1A	F8W9I9;Q13627-3;Q13627-4;Q13627-5;Q13627-2;Q13627;F8WAP0	24.9341	25.3361	24.7553	25.0739	24.7145	25.1642		0.139829	0.965558		-0.621609	0.882278		0.408952	0.87162			0.99425		25.5105	25.3511	23.9406	24.7645	26.976	24.2678	24.0526	25.4488	24.7645	25.8457	25.275	25.2678	23.9071	25.3943	23.0759	24.654	25.7338	25.0401	24.0844	25.9716	25.5609
ECE1	Endothelin-converting enzyme 1	B4DKB2;P42892-3;P42892-2;P42892-4;P42892	26.4648	26.6132	26.6818	26.1815	26.2238	25.9775		-0.283308	0.895845		-0.389464	0.753079		-0.704294	0.302926			0.690749		26.329	26.0254	27.0401	26.3844	26.4362	27.019	26.6998	26.6458	26.6998	26.3778	25.9338	25.5404	26.8741	26.3695	25.8576	26.3578	26.3101	25.6376	26.0975	26.2299	25.945
ECH1	Delta(3,5)-Delta(2,4)-dienoyl-CoA isomerase, mitochondrial	Q13011	27.6061	27.7788	27.9862	28.0354	28.195	28.0683		0.42932	0.832922		0.416143	0.752631		0.082118	0.819448			0.783578		28.0813	27.0505	27.6865	28.2445	27.4394	27.6527	27.8741	28.17	27.9146	27.8682	27.8142	27.8203	28.6389	28.391	27.9372	28.3452	28.1065	28.1556	27.9705	28.0608	28.0864
ECHDC1	Ethylmalonyl-CoA decarboxylase	Q9NTX5-3;Q9NTX5-6;Q9NTX5-2;Q9NTX5	25.5333	25.7522	26.9827	26.8394	27.1815	27.2504		1.30617	0.837895		1.42934	0.759675		0.267702	0.671362			0.722494		27.1015	26.4645	23.0339	26.5898	26.976	23.6907	26.8264	27.0505	27.0711	26.7771	27.2891	26.6458	26.6458	27.4938	27.2535	27.0813	26.8973	27.4073	27.1507	26.965	27.4785
ECHS1	Enoyl-CoA hydratase, mitochondrial	P30084	27.1654	27.8184	27.7857	28.0958	27.9796	28.1		0.930415	0.52149		0.161171	0.824907		0.314346	0.651075			0.0717077		27.2354	27.1795	27.0813	27.9539	27.6931	27.8081	27.8858	27.7453	27.726	27.8264	28.17	27.8741	28.5128	28.1747	28.0557	27.9814	27.7064	28.2535	28.1164	27.7064	28.3239
ECI2	Enoyl-CoA delta isomerase 2, mitochondrial	O75521-2;O75521;F8WAW4;F8W6J1;F1LLU7;C9JB63	23.021	23.002	23.1196	23.3568	23.9885	23.1224		0.335821	0.845564		0.986517	0.490348		0.00279903	0.999693			0.565067		23.5873	22.6115	22.8641	23.4425	22.5883	22.9751	23.3577	23.2361	22.7651	23.3906	23.2821	23.0338	23.7207	24.2535	24.1015	23.5522	24.0468	23.7053	22.0817	23.2535	23.4492
ECM1	Extracellular matrix protein 1	Q16610;Q16610-4;Q16610-2	26.7117	26.473	26.7974	26.3725	26.0136	26.0038		-0.339232	0.820102		-0.45946	0.620993		-0.79353	0.273011			0.186233		26.533	26.7518	26.8504	26.3307	26.6458	26.4425	26.8019	26.7518	26.8385	26.5595	25.7746	26.7389	26.417	25.8166	25.9383	26.3745	25.9248	25.6918	26.0084	25.976	26.3393
ECM29	Proteasome-associated protein ECM29 homolog	Q5VYK3;B3KXF2	27.6907	27.4272	27.4059	27.5451	27.6039	27.4785		-0.145579	0.861017		0.17673	0.812319		0.072547	0.900845			0.851639		27.5536	27.9146	27.604	27.3325	27.4707	27.4785	27.3745	27.4938	27.3494	27.6181	27.7518	27.5754	27.2354	27.8858	27.4551	27.6595	27.4154	27.3239	27.604	27.2535	27.7325
EDC4	Enhancer of mRNA-decapping protein 4	Q6P2E9;Q6P2E9-2	25.5823	25.6333	25.482	25.6685	25.3477	25.545		0.0861328	0.918561		-0.285622	0.839617		0.0629899	0.947516			0.912223		25.5522	25.8336	25.3612	25.2607	25.6096	26.0296	25.433	25.2714	25.7415	26.0062	25.5225	25.5696	25.5754	25.6649	25.3239	24.9406	25.4614	25.2535	25.6838	25.4138	25.8288
EEA1	Early endosome antigen 1	Q15075	27.8921	27.9504	27.9361	27.9917	28.0009	28.1236		0.099682	0.891875		0.0505115	0.91171		0.187529	0.51584			0.837783		27.9705	27.9539	27.7518	27.8623	28.0349	27.9539	27.8564	27.9705	27.9814	28.0965	28.0711	28.1263	27.673	28.0813	27.9428	28.1652	27.8142	28.1604	28.2354	28.1065	27.9923
EEF1A1	Putative elongation factor 1-alpha-like 3;Elongation factor 1-alpha 1	Q5VTE0;P68104;Q6IQ15;F8W6I0	30.7549	30.4822	30.3496	30.6569	30.5233	30.4535		-0.098026	0.904541		0.0411156	0.900364		0.103831	0.890038			0.671053		30.8829	30.7533	30.6285	30.4629	30.5109	30.4727	30.5754	30.1115	30.362	30.7129	30.9609	30.3515	30.6022	30.6022	30.341	30.5389	30.611	30.3515	30.3828	30.2869	30.7927
EEF1B2	Elongation factor 1-beta	P24534	29.8158	29.9354	29.9143	29.741	29.8705	30.0531		-0.0747795	0.954464		-0.0648772	0.959811		0.138769	0.771777			0.915607		30.0084	29.7227	29.7162	29.6441	29.8973	30.2647	29.8234	29.7958	30.1239	29.7178	30.2422	29.4053	29.5987	30.0608	29.7833	30.099	29.5389	30.0479	30.2077	29.8959	30.0608
EEF1D	Elongation factor 1-delta	E9PK01;P29692;E9PRY8;P29692-2;E9PPR1;E9PL12;E9PQ49;E9PI39;E9PMW7;E9PBQ9;E9PIZ1;H0YCK7	29.0013	28.6524	28.6391	28.9627	28.6927	28.6583		-0.0386593	0.959349		0.040328	0.948405		0.0191774	0.957508			0.261721		29.0531	29.0137	28.9372	28.5352	28.7389	28.6831	28.5646	28.6697	28.6831	29.0375	29.104	29.0634	28.6458	28.7613	28.4707	28.6561	28.8829	28.5536	28.5646	28.8623	28.6527
EEF1E1	Eukaryotic translation elongation factor 1 epsilon-1	O43324;D6RBD7;C9J1V9;C9JLK5;H0YAL7	26.5361	26.3031	26.3564	26.2224	26.1757	26.372		-0.313762	0.789604		-0.12743	0.844827		0.0155225	0.981459			0.808996		26.4785	26.7389	26.391	26.1546	26.2426	26.512	26.1273	26.3943	26.5478	26.3494	25.9111	26.4362	26.1927	25.9998	26.1642	26.329	26.2096	26.0317	26.3695	26.5492	26.5374
EEF1G	Elongation factor 1-gamma	P26641;B4DTG2;B4DUP0	30.8894	30.9041	31.0032	30.9317	31.0676	31.0662		0.0422661	0.93248		0.163536	0.795832		0.0630571	0.913131			0.877906		30.8309	30.94	30.8973	30.8157	30.8682	31.0283	31.0608	30.947	31.0017	30.995	31.099	30.9117	30.7211	31.2979	30.9259	31.0927	30.9539	30.94	31.1842	30.8157	31.325
EEF2	Elongation factor 2	P13639;B4DPU3;F5H370	28.8252	28.6262	28.5725	28.5557	28.5961	28.6059		-0.269534	0.665078		-0.0300891	0.965542		0.0334438	0.949471			0.680917		28.8355	28.8916	28.7486	28.5682	28.5682	28.7421	28.5646	28.6251	28.5278	28.6075	28.4512	28.4976	28.6663	28.7325	28.4823	28.4274	28.7421	28.5352	28.6146	28.4234	28.8504
EFEMP1	EGF-containing fibulin-like extracellular matrix protein 1	Q12805-2;Q12805-4;Q12805-3;Q12805;B4DW75;E9PGL6	26.8223	26.5995	26.654	26.3852	26.1659	26.3027		-0.437052	0.652535		-0.433533	0.718235		-0.351267	0.668896			0.376916		26.8142	26.8385	26.8142	26.4692	26.4908	26.8385	26.604	26.726	26.632	26.2463	26.1871	26.673	26.4346	26.4831	26.3943	25.9383	25.8481	26.5135	26.189	25.8764	26.632
EFHD2	EF-hand domain-containing protein D2	Q96C19;C9JTI6;H0Y4Y4	24.9662	25.0446	25.0639	25.1158	25.317	25.1115		0.149598	0.897319		0.272324	0.824069		0.0476252	0.954486			0.912026		25.1095	24.5983	25.1908	25.1527	24.8481	25.1332	25.0443	24.7695	25.3778	25.4234	25.1527	25.1795	24.7077	25.797	25.1253	25.3307	25.0148	25.2354	25.0148	24.9316	25.2643
EFNB1	Ephrin-B1	P98172	26.2693	25.9628	25.9151	26.2996	25.6501	25.8704		0.0303375	0.97021		-0.31267	0.79598		-0.0446731	0.964875			0.453523		26.1095	26.3778	26.3205	25.767	26.0854	26.0359	25.8973	26.1507	25.6971	26.2589	25.9628	26.5389	26.4378	25.228	26.0547	25.6153	25.7024	25.6237	26.3031	25.5105	26.0443
EFTUD1	Elongation factor Tu GTP-binding domain-containing protein 1	Q7Z2Z2;Q7Z2Z2-2	25.7993	25.5805	25.5123	25.764	25.4294	25.6625		-0.0353324	0.975789		-0.151068	0.825446		0.150226	0.866518			0.826766		25.5433	25.8504	26.0041	25.6209	25.3511	25.7695	25.4362	25.433	25.6676	25.6431	25.792	25.4488	26.1719	25.4892	25.5638	25.3511	25.3135	25.3135	25.8142	25.4738	26.0484
EGF	Pro-epidermal growth factor;Epidermal growth factor	E7EVD2;P01133;P01133-2	25.7259	25.4307	25.6923	25.5903	25.2764	25.1112		-0.135555	0.880052		-0.154295	0.877874		-0.581051	0.638977			0.628828		25.8019	25.4041	25.9716	25.4831	25.4614	25.3477	25.4362	26.0169	25.6237	25.7286	25.5783	25.3679	25.6865	25.7024	24.9271	24.9628	25.5135	25.5195	24.8044	24.6595	25.4614
EHBP1	EH domain-binding protein 1	Q8NDI1-3;Q8NDI1-2;Q8NDI1	23.6135	24.1497	23.2349	23.6282	23.7093	23.5987		0.0146171	0.997008		-0.440377	0.73922		0.363739	0.834248			0.840703		23.8858	23.391	23.5638	24.1253	24.0275	24.2961	23.895	23.3807	22.429	23.123	24.2535	24.1642	22.9718	23.1432	23.9134	23.867	23.9134	23.6209	23.1961	24.0854	23.4923
EHBP1L1	EH domain-binding protein 1-like protein 1	Q8N3D4;E9PIH6	25.2624	25.8488	25.4578	25.696	25.1737	25.1596		0.433592	0.826508		-0.675156	0.843884		-0.298176	0.905165			0.922239		25.5812	25.217	24.989	25.7543	25.9157	25.8764	25.8093	25.2891	25.275	26.17	25.7796	25.3239	25.5105	25.4488	25.8504	23.5521	25.8433	25.9517	23.7379	25.2785	25.6703
EHD1	EH domain-containing protein 1	Q9H4M9;F5H5B6;B4DZH9;C9JC03;C9J2Z4	31.3403	31.5858	31.6163	31.4084	31.5031	31.5682		0.0681003	0.943631		-0.082678	0.853504		-0.0480663	0.954657			0.891368		31.6839	31.2193	31.1177	31.5799	31.4727	31.7047	31.6198	31.4134	31.8157	31.1361	31.5435	31.5156	31.4384	31.5296	31.4284	31.6923	31.362	31.2814	31.8271	31.4433	31.7211
EHD3	EH domain-containing protein 3	Q9NZN3	33.1988	33.3115	33.3203	33.3512	33.3928	33.3843		0.152438	0.820999		0.0813014	0.823774		0.0640256	0.869739			0.825959		33.3303	33.1468	33.1192	33.2759	33.2759	33.3828	33.3956	33.2619	33.3033	33.2193	33.4458	33.5062	33.2336	33.4083	33.2897	33.5296	33.3436	33.1753	33.4581	33.4458	33.4581
EHD4	EH domain-containing protein 4	Q9H223	28.1739	28.2121	28.1666	28.1277	28.17	28.2198		-0.0462101	0.943677		-0.0421371	0.96384		0.0531933	0.875149			0.998038		28.3109	28.2077	28.003	28.0762	28.2535	28.3066	28.1361	28.1652	28.1984	28.0137	28.3578	28.003	28.1361	28.49	28.17	28.066	27.9539	28.391	28.0914	28.2123	28.1842
EHHADH	Peroxisomal bifunctional enzyme;Enoyl-CoA hydratase/3,2-trans-enoyl-CoA isomerase;3-hydroxyacyl-CoA dehydrogenase	Q08426;Q08426-2;F5GWL9	25.1121	24.6953	23.9095	24.7937	24.6076	24.6419		-0.318345	0.914543		-0.0876638	0.987111		0.73241	0.850601			0.939451		25.3645	25.0813	24.8904	25.2785	24.9584	23.8489	22.2532	24.632	24.8433	25.5983	24.7102	23.4081	25.4583	24.9933	22.8044	25.1871	25.4457	24.9628	23.2194	25.065	25.3205
EIF1	Eukaryotic translation initiation factor 1	P41567	24.8308	24.213	24.7061	24.9844	24.7753	24.9669		0.153586	0.913443		0.562318	0.871838		0.260793	0.798171			0.924607		25.0148	24.48	24.9977	22.5755	24.1095	25.9539	24.7695	24.4676	24.8811	25.1946	25.3943	24.4676	24.8811	24.6209	24.7389	25.0233	24.7182	25.33	24.5638	25.2607	24.7129
EIF1AX	Eukaryotic translation initiation factor 1A, X-chromosomal	P47813	23.3874	24.5745	24.2762	24.8499	24.2858	23.628		1.46257	0.822262		-0.288683	0.887612		-0.64817	0.746048			0.770722		21.5947	24.4984	24.0691	24.5983	24.3307	24.7945	24.3101	23.9316	24.5869	23.6619	25.4953	25.141	25.1015	24.3239	24.558	25.0567	23.2048	23.9223	22.5405	24.3844	23.6649
EIF2A	Eukaryotic translation initiation factor 2A;Eukaryotic translation initiation factor 2A, N-terminally processed	Q9BY44;B4DQ14;F8WAE5;B4DF96;Q9BY44-2	27.0623	27.2567	27.3122	27.1926	27.1784	27.191		0.130271	0.897456		-0.0782657	0.918029		-0.121242	0.770573			0.939849		27.3239	26.9202	26.9428	27.1795	27.2077	27.3828	27.3662	27.1795	27.391	27.0608	27.2891	27.5463	26.8741	27.2979	26.8019	27.4154	27.1984	26.9869	27.2891	27.2803	27.2077
EIF2AK2	Interferon-induced, double-stranded RNA-activated protein kinase	E9PC80;P19525	25.4793	25.3897	25.3971	25.5759	25.5963	25.4597		0.0966298	0.886071		0.206603	0.870992		0.0626211	0.890937			0.940276		25.5609	25.3307	25.5463	25.141	25.3443	25.6838	25.4041	25.4362	25.3511	25.3376	25.772	25.6568	25.5374	26.1852	25.228	25.5045	25.4676	25.6431	25.4394	25.228	25.5285
EIF2B1	Translation initiation factor eIF-2B subunit alpha	Q14232;B4DGX0;F5H0D0	27.7913	27.6313	27.4652	27.6246	27.8272	27.8083		-0.166642	0.850883		0.195956	0.835447		0.343143	0.594854			0.838482		27.5389	28.0453	27.7895	27.7518	27.6181	27.524	27.3494	27.5754	27.4707	27.5014	27.9146	27.604	27.4785	27.8741	28.1652	27.3494	27.9202	28.1795	27.5826	27.7518	27.7195
EIF2B2	Translation initiation factor eIF-2B subunit beta	P49770	24.3759	24.9401	24.7216	24.8147	25.014	24.5959		0.438841	0.898419		0.0738446	0.872727		-0.125718	0.954402			0.939074		23.3376	24.8904	24.8997	24.945	24.9803	24.895	24.8044	24.976	24.3844	23.5756	25.0975	25.4923	25.0935	24.9716	25.0105	25.2354	24.8385	24.6595	25.5075	24.6918	23.5248
EIF2B3	Translation initiation factor eIF-2B subunit gamma	Q9NR50-3;Q9NR50-2;Q9NR50;H0Y580	26.6265	26.3688	26.4125	26.4382	26.4606	26.5065		-0.188341	0.829053		0.0918271	0.830823		0.0940547	0.949036			0.939559		26.5754	26.5653	26.7389	26.4138	26.228	26.4645	26.4969	26.5667	26.1738	26.3595	26.6865	26.329	26.3778	26.3325	26.48	26.5014	26.5285	25.9517	26.9428	26.3926	26.7389
EIF2B4	Translation initiation factor eIF-2B subunit delta	F5H6W1;E7ERK9;Q9UI10-3;Q9UI10;Q9UI10-2;F8W8L6	23.8508	23.7059	23.4987	24.1467	24.135	24.3397		0.295912	0.87727		0.42908	0.884773		0.841043	0.461308			0.891639		23.4199	23.5869	24.5455	22.5105	24.0608	24.5463	23.4104	23.0751	24.0105	23.7389	24.5225	24.317	24.0083	24.4425	24.8142	22.98	24.3031	24.0691	24.5404	24.4862	24.2633
EIF2B5	Translation initiation factor eIF-2B subunit epsilon	E9PC74;Q13144	25.3306	25.1002	24.1988	25.3297	25.3672	23.8392		-0.000877857	0.997294		0.267025	0.808264		-0.359596	0.925094			0.374917		25.1871	25.5225	25.2821	24.9316	25.4105	24.9584	25.1332	24.0511	23.4122	25.5926	25.4892	25.1719	25.065	25.3342	25.065	25.6918	25.3778	25.673	23.4343	23.3252	22.9244
EIF2S1	Eukaryotic translation initiation factor 2 subunit 1	P05198	28.744	28.6353	28.7028	28.6718	28.774	28.788		-0.0721567	0.817709		0.138781	0.828309		0.0852766	0.807031			0.884702		28.6458	28.7357	28.8504	28.5128	28.7645	28.6285	28.7802	28.7031	28.6251	28.6798	28.7064	28.6831	28.6181	29.0164	28.6181	28.7325	28.7292	28.8623	28.6898	28.6629	28.9372
EIF2S2	Eukaryotic translation initiation factor 2 subunit 2	P20042	27.4179	27.4726	27.2195	27.5086	27.468	27.5986		0.0906348	0.91658		-0.00467094	0.998857		0.379166	0.761414			0.923132		27.217	27.6458	27.391	27.7645	27.391	27.2625	27.341	26.8623	27.4551	27.7645	27.17	27.5389	27.5609	27.1214	27.5898	27.4154	27.7453	27.632	27.632	28.1115	27.019
EIF2S3	Eukaryotic translation initiation factor 2 subunit 3;Putative eukaryotic translation initiation factor 2 subunit 3-like protein	P41091;Q2VIR3;F8W810;Q2VIR3-2	29.6299	29.7387	29.6142	29.5538	29.734	29.6859		-0.0761712	0.919274		-0.00467698	0.998222		0.0716896	0.844555			0.921435		29.6458	29.6578	29.5862	29.4512	29.8249	29.94	29.5407	29.6004	29.7014	29.2054	29.7581	29.7502	29.5014	29.8019	29.8504	29.8188	29.4649	29.7227	29.8035	29.4995	29.7178
EIF3A	Eukaryotic translation initiation factor 3 subunit A	F5H335;Q14152	27.7807	27.5087	27.5886	27.5501	27.6039	27.5366		-0.230563	0.811499		0.0952137	0.88296		-0.051994	0.896387			0.876647		27.7958	27.8799	27.6663	27.6865	27.2077	27.632	27.3745	27.6458	27.7453	27.7195	27.2535	27.4629	27.7645	27.8019	27.4629	27.5754	27.5754	27.5389	27.5463	27.5826	27.4785
EIF3B	Eukaryotic translation initiation factor 3 subunit B	B4DV79;F8W8C8;P55884;P55884-2	28.646	28.6671	28.5257	28.683	28.6311	28.6361		0.0370407	0.951989		-0.0359926	0.931754		0.110314	0.824821			0.935005		28.6004	28.6181	28.7195	28.5862	28.6285	28.7864	28.4591	28.5646	28.5536	28.6285	28.7549	28.8741	28.4746	28.7162	28.5862	28.7357	28.4862	28.6389	28.8858	28.391	28.6285
EIF3C	Eukaryotic translation initiation factor 3 subunit C;Eukaryotic translation initiation factor 3 subunit C-like protein	B4DVQ5;F5H4V1;Q99613;B5ME19;B4DVU3;C9J1F3;B4DDN4;H3BRV0;B4DRU0	27.2918	26.9815	26.8797	27.1581	27.0927	26.9681		-0.133701	0.878851		0.111232	0.806218		0.0883869	0.895891			0.652164		27.0711	27.524	27.2803	27.0711	26.8973	26.976	26.521	27.1312	26.9869	27.4707	27.0711	27.0505	27.0401	27.1984	26.9202	27.1507	27.1015	27.0608	26.8741	26.8973	27.0401
EIF3D	Eukaryotic translation initiation factor 3 subunit D	B4DVY1;A8MWD3;O15371	26.8954	26.7738	26.8414	26.879	27.0669	26.9431		-0.0163967	0.976562		0.293135	0.775331		0.101621	0.870122			0.885502		26.9869	26.8973	26.8019	26.7389	26.574	27.0084	26.7645	26.8858	26.8741	26.7771	26.9316	27.0813	26.726	27.3578	26.8973	27.2354	26.7771	26.6998	27.2445	26.8741	26.9539
EIF3E	Eukaryotic translation initiation factor 3 subunit E	P60228;E5RGA2	27.6196	27.36	27.1744	27.3426	27.4491	27.351		-0.277012	0.813888		0.08918	0.926658		0.176546	0.755119			0.837508		27.5536	27.6663	27.6389	27.2803	27.217	27.5826	26.8504	27.3066	27.3662	26.9202	27.524	27.2803	27.6458	27.8324	27.2891	27.5536	27.1214	27.3153	27.3828	27.3992	27.3066
EIF3F	Eukaryotic translation initiation factor 3 subunit F	B4DMT5;B3KSH1;O00303	27.7275	27.5324	27.6575	27.4017	27.7329	27.5877		-0.325802	0.777178		0.200562	0.812785		-0.0697773	0.883624			0.670564		27.5754	27.7389	27.8682	27.2714	27.673	27.6527	27.5609	27.7453	27.6663	27.3828	27.5969	27.141	27.4862	27.7833	27.7195	27.9428	27.4862	27.524	27.7958	27.3992	27.632
EIF3G	Eukaryotic translation initiation factor 3 subunit G	O75821	25.3109	25.2811	25.2219	25.3386	25.1536	25.3603		0.0277777	0.976376		-0.127439	0.869501		0.138331	0.808076			0.933316		25.2856	25.6153	25.0317	25.4298	25.2607	25.1527	25.4923	25.1293	25.0443	25.4008	25.1174	25.341	25.4953	25.0317	25.3066	24.8336	25.4425	25.3205	25.3975	25.1946	25.5285
EIF3H	Eukaryotic translation initiation factor 3 subunit H	O15372;E5RJT0	25.1799	24.7555	24.0474	23.908	24.2973	24.4667		-1.27186	0.74567		-0.458213	0.923942		0.419213	0.884405			0.914526		24.8385	25.4298	25.2714	24.9977	25.9043	23.3645	23.8191	24.7594	23.5638	23.9316	22.6571	24.5696	24.4738	22.4649	24.48	24.4105	25.8336	25.2463	23.8832	25.391	23.3461
EIF3I	Eukaryotic translation initiation factor 3 subunit I	Q13347	27.3628	27.3542	27.2907	27.4458	27.3334	27.3068		0.0830199	0.941828		-0.0207593	0.97833		0.0160643	0.967328			0.984807		27.1015	27.341	27.6458	27.3325	27.3066	27.4234	27.2077	27.3578	27.3066	27.7895	27.2077	27.5969	27.189	27.1214	27.3239	27.5389	27.3494	27.3239	27.5315	27.2803	27.0914
EIF3J	Eukaryotic translation initiation factor 3 subunit J	B4DUI3;F5H425;O75822	24.4062	24.8013	23.1138	24.5401	23.2726	23.7725		0.133944	0.969269		-1.52872	0.667934		0.658627	0.885095			0.797374		23.6676	25.0105	24.5404	24.7024	24.9271	24.7746	22.6314	24.824	21.8861	25.1908	25.0062	24.8858	23.0776	24.7796	22.9626	23.2644	22.0839	24.6153	24.8142	21.8246	23.8357
EIF3K	Eukaryotic translation initiation factor 3 subunit K	B7ZAM9;Q9UBQ5	27.3725	27.3579	27.209	27.3427	27.3102	27.1741		-0.029858	0.957798		-0.047725	0.981916		-0.0348875	0.96615			0.976364		27.3325	27.217	27.5682	27.1115	27.217	27.7453	27.2979	27.1214	27.2077	27.1984	27.2625	27.4314	27.4785	27.509	27.217	27.7129	26.8019	27.391	27.2714	26.6595	27.3745
EIF3L	Eukaryotic translation initiation factor 3 subunit L	B0QY89;Q9Y262;G8JLH4;B0QY90	28.5771	28.6672	28.5999	28.7182	28.7506	28.7588		0.141061	0.743986		0.0833809	0.923899		0.15883	0.798046			0.922211		28.5898	28.6251	28.5165	28.4512	28.6216	28.9288	28.5352	28.6964	28.5682	28.6629	28.7802	28.8081	28.6216	29.094	28.6216	28.7739	28.5128	28.7227	28.9732	28.4274	28.9117
EIF3M	Eukaryotic translation initiation factor 3 subunit M	Q7L2H7;B4E2Q4;H0YCQ8	27.202	26.9783	26.8438	27.2216	27.3515	27.1342		0.0196724	0.992591		0.373164	0.66858		0.290437	0.593807			0.836503		27.3992	26.7129	27.4938	26.9316	26.8623	27.141	26.9539	26.8385	26.7389	26.5374	27.2354	27.524	27.5898	27.4073	27.0813	27.6458	27.2714	27.0296	27.141	26.9428	27.4234
EIF4A1	Eukaryotic initiation factor 4A-I	P60842	31.1067	30.8543	31.0336	30.9216	30.9877	30.9793		-0.185145	0.743443		0.133365	0.856991		-0.0542719	0.840658			0.843601		30.9882	31.13	31.2019	30.6372	30.7533	31.1724	30.9814	31.0017	31.1177	30.9609	31.0414	30.8682	30.8157	31.2135	30.9046	31.0017	30.8309	30.995	30.9677	30.8682	31.0864
EIF4A2	Eukaryotic initiation factor 4A-II;Eukaryotic initiation factor 4A-II, N-terminally processed	Q14240-2	27.9604	27.7514	27.811	27.8634	27.9822	27.8032		-0.0970513	0.861865		0.230747	0.387684		-0.00787719	0.990625			0.839879		28.0137	27.8916	27.976	27.8623	27.7325	27.6595	27.7064	27.9372	27.7895	27.8504	27.6251	27.9484	28.0296	28.0296	27.9869	27.9977	27.9146	27.6389	27.9259	27.5165	28.1312
EIF4B	Eukaryotic translation initiation factor 4B	E7EPC9;E7EX17;P23588;B4DS13	28.6119	28.7445	28.3625	28.7035	28.6694	28.6943		0.091584	0.89943		-0.075067	0.941883		0.33174	0.662546			0.840884		28.7989	28.3239	28.7129	28.362	28.8081	29.0634	28.5128	27.9814	28.5934	28.6561	28.7581	28.8682	28.5315	28.4668	28.673	28.7421	28.7958	28.579	28.6527	28.6251	28.9202
EIF4E	Eukaryotic translation initiation factor 4E	D6RBW1;P06730;P06730-3;P06730-2;H0Y8J7	28.8842	28.6906	28.729	27.8679	28.2291	28.3426		-1.01636	0.724942		-0.461488	0.733804		-0.386344	0.368669			0.233999		28.8415	29.0788	28.7325	28.4785	28.6561	28.9372	28.7031	28.6424	28.8415	27.2535	27.611	28.0243	28.5826	28.3239	28.611	27.7645	28.217	28.3196	28.141	28.4314	28.4785
EIF4G1	Eukaryotic translation initiation factor 4 gamma 1	E7EX73;E9PGM1;E7EUU4;Q04637-5;Q04637-4;Q04637-3;Q04637;E9PFM1;Q04637-6;G5E9S1;C9JF13	29.1665	29.0548	29.1402	29.0498	29.1662	29.0834		-0.116653	0.809172		0.111405	0.841035		-0.0568341	0.88656			0.913589		29.1724	29.2869	29.0401	28.965	28.906	29.2935	28.9512	29.1628	29.3066	29.0479	29.1361	29.0557	28.9595	29.2602	29.1065	29.114	29.1842	29.0349	29.141	29.0839	29.0737
EIF4G2	Eukaryotic translation initiation factor 4 gamma 2	P78344;D3DQV9;P78344-2;H0Y3P2	29.4033	29.2037	29.1927	29.1932	29.2318	29.2774		-0.210148	0.638841		0.0280547	0.950945		0.084688	0.86063			0.756818		29.391	29.4823	29.3367	29.1115	29.1652	29.3346	29.1604	29.2913	29.1263	29.2376	29.1819	29.2847	29.0686	29.3325	29.2123	29.2935	29.0889	29.3001	29.3745	29.0296	29.4053
EIF4H	Eukaryotic translation initiation factor 4H	Q15056-2;Q15056	29.4565	29.3719	29.5022	29.4127	29.3556	29.388		-0.0438345	0.967012		-0.0162714	0.988717		-0.11419	0.7173			0.989203		29.3515	29.5033	29.5146	29.1819	29.3766	29.5573	29.4746	29.5808	29.4512	29.6629	29.651	29.4194	28.9174	29.5736	29.2147	29.4012	29.2331	29.249	29.4113	29.3473	29.5444
EIF5	Eukaryotic translation initiation factor 5	P55010;H0YLZ1;H0YN40	26.9754	26.5015	26.567	26.6413	26.7154	26.7949		-0.334049	0.611179		0.213952	0.776035		0.227842	0.803494			0.653378		26.9869	27.019	26.9202	26.3695	26.5754	26.5595	26.275	26.8623	26.5638	26.7771	26.5754	26.7129	26.4999	27.0084	26.5725	26.5419	26.7389	26.6998	27.0813	26.4008	26.9977
EIF5A	Eukaryotic translation initiation factor 5A-1;Eukaryotic translation initiation factor 5A;Eukaryotic translation initiation factor 5A-1-like	P63241;I3L397;I3L504;P63241-2;Q6IS14	30.8068	31.1102	31.2147	31.0314	31.0983	31.0531		0.224517	0.849249		-0.0118996	0.994353		-0.161666	0.818264			0.915582		30.8901	30.7771	30.7533	30.8459	31.0414	31.4433	31.2924	30.995	31.3568	31.1422	31.3088	31.099	30.5754	31.4334	30.8973	31.3828	30.6798	30.8756	31.341	30.8234	31.1724
EIF5B	Eukaryotic translation initiation factor 5B	O60841	24.5566	25.8393	25.6469	25.4396	25.5856	25.5415		0.882965	0.87951		-0.253708	0.870295		-0.105379	0.906728			0.913318		25.895	25.8361	21.9387	26.3477	25.5522	25.6181	25.5754	25.8457	25.5195	25.4551	25.6971	25.1604	25.4457	25.8858	25.5667	25.9584	24.9316	26.0105	25.3101	25.5955	25.2499
EIF6	Eukaryotic translation initiation factor 6	P56537;B7ZBG9	26.8365	26.7735	26.6749	26.6812	27.0056	26.8823		-0.155263	0.892356		0.232149	0.793965		0.207421	0.861124			0.915736		27.019	26.726	26.7645	26.8264	26.518	26.976	26.9316	26.0955	26.9977	26.2553	26.965	26.9539	26.5507	26.9977	26.7389	27.2354	27.0505	26.6998	27.0505	26.7389	27.0401
ELAVL1	ELAV-like protein 1	Q15717	23.4072	23.9277	24.407	25.2255	25.3906	24.7628		1.81827	0.807711		1.46296	0.785881		0.355781	0.957207			0.900774		22.9674	21.5866	25.6676	25.8019	22.4988	23.4823	25.1871	22.6695	25.3645	25.5075	23.8078	26.0084	25.5783	25.7619	26.0211	25.797	23.9825	25.8215	21.8493	25.7182	25.6622
ELMO1	Engulfment and cell motility protein 1	Q92556;B4DJV6;Q92556-3	27.8198	27.6373	27.6305	27.7578	27.8158	27.8871		-0.0619796	0.914851		0.178444	0.824262		0.256571	0.515825			0.785447		27.7771	27.8142	27.8682	27.3992	27.6865	27.8264	27.5536	27.6251	27.7129	27.5898	27.5898	27.9316	27.9202	27.9977	27.8799	27.7958	27.5898	27.7771	27.7833	27.8916	28.0965
ELP5	Elongator complex protein 5	I3L1Q3;Q8TE02;Q8TE02-4;I3L2A9;I3L2T0;I3L3N8;I3L437;Q8TE02-3;Q8TE02-2	23.6415	22.8218	23.2212	23.8246	23.955	23.2254		0.183153	0.897446		1.13321	0.310242		0.00418266	1			0.653527		23.756	24.0853	23.0832	22.7762	22.9998	22.6892	22.9343	23.867	22.8623	23.5522	24.1095	23.7286	23.9083	24.0359	23.6441	23.7492	24.3908	23.8576	24.317	22.4571	22.2699
EMC1	ER membrane protein complex subunit 1	Q8N766-4;Q8N766-2;Q8N766;Q5TG60;H7BYA9;Q8N766-3	23.0619	22.9902	24.1125	23.603	23.569	22.8458		0.541059	0.878658		0.578837	0.852386		-1.26672	0.541541			0.841564		22.9277	22.4341	23.824	23.7594	23.4245	21.7866	23.5983	24.5522	24.1871	22.7762	23.3322	23.3276	24.976	24.4591	22.6771	24.0435	23.0964	23.6779	21.763	23.1474	22.795
EMC2	ER membrane protein complex subunit 2	Q15006;H0YAS9	24.143	25.3313	25.1088	25.3309	24.9319	25.3483		1.18792	0.847209		-0.399402	0.736108		0.239452	0.792929			0.869937		21.5912	25.217	25.6209	25.5165	25.433	25.0443	25.433	25.0359	24.8576	25.228	25.0443	25.5869	25.4645	24.6595	24.6865	25.1757	25.2058	25.065	25.1449	25.6458	25.5374
EMC8	ER membrane protein complex subunit 8	O43402;C9JB21	23.5921	24.8874	24.7546	24.7457	24.9107	24.8113		1.15356	0.756992		0.0233736	0.9904		0.0566619	0.940857			0.275491		23.0051	22.9669	24.8044	25.1795	24.4551	25.0275	24.654	25.0401	24.5696	24.7441	24.8764	24.6757	24.6865	24.7895	25.1527	24.8385	24.8623	24.9271	24.9089	24.6096	24.7995
EMD	Emerin	P50402;Q5HY57	27.1003	27.2917	27.4595	27.2287	27.2158	26.7734		0.128377	0.926713		-0.075877	0.877812		-0.686062	0.58647			0.714489		27.2262	27.189	26.8858	27.17	27.2979	27.4073	27.189	27.673	27.5165	27.3325	27.7708	26.632	27.1795	27.4707	27.1312	27.0914	27.17	27.1115	26.9316	27.019	26.0317
EMILIN1	EMILIN-1	Q9Y6C2	30.4583	30.3347	30.3374	29.4124	28.897	28.8116		-1.04596	0.642074		-1.43776	0.241308		-1.52583	0.150225		+	0.000912468		30.4823	30.3724	30.5203	30.2422	30.3088	30.4532	30.3303	30.3303	30.3515	29.5826	28.8916	29.2354	29.94	29.3217	28.7292	28.8945	28.6424	28.8234	28.8264	28.4433	29.1532
EML2	Echinoderm microtubule-associated protein-like 2	O95834;O95834-2;F5GYW5;C9JRL6	29.8246	29.9304	29.8765	29.716	29.7897	29.9401		-0.108532	0.850274		-0.140728	0.775846		0.0635748	0.930148			0.841582		29.7708	29.7771	29.9259	29.9117	29.9117	29.9677	29.7692	29.7613	30.099	29.726	29.8459	29.8157	29.4765	29.9677	29.6865	29.8638	29.6407	29.6492	30.1483	29.995	29.9677
EML3	Echinoderm microtubule-associated protein-like 3	B7WPE2;Q32P44;G3V195;H0Y3M3;Q32P44-2;G3V1D0	27.374	27.3393	27.4529	27.6007	27.5848	27.4225		0.226643	0.81235		0.245504	0.585651		-0.0303612	0.939586			0.544966		27.1604	27.4154	27.5463	27.2445	27.4073	27.3662	27.3494	27.4629	27.5463	27.4862	27.8019	27.5536	27.5609	27.6798	27.6251	27.611	27.4234	27.4073	27.524	27.2803	27.4785
EML4	Echinoderm microtubule-associated protein-like 4	B5MBZ0;Q9HC35;B5MCW9	26.6232	26.9567	26.8448	26.9613	27.0334	27.1278		0.338071	0.766507		0.0766546	0.914458		0.282996	0.429275			0.369928		26.4218	26.8019	26.6458	26.6865	26.8858	27.2979	26.6998	26.8264	27.0084	26.8504	27.189	26.9316	26.8741	26.976	27.141	26.9869	27.0296	27.1312	27.1984	27.0505	27.1312
ENDOD1	Endonuclease domain-containing 1 protein	O94919	27.9157	28.4095	28.6272	27.733	28.009	28.2047		-0.182669	0.847313		-0.400506	0.356431		-0.422595	0.425031		+	0.0177653		28.0762	27.8264	27.8445	28.4591	28.3951	28.3745	28.5315	28.6146	28.7357	27.8504	27.4629	27.5682	28.0505	28.0914	28.17	27.9484	27.8264	27.9869	28.1214	28.3153	28.3951
ENO1	Alpha-enolase	P06733;P06733-2	34.1244	34.4222	34.3726	34.2362	34.2753	34.3425		0.111788	0.864491		-0.146845	0.841237		-0.0301606	0.958956			0.856995		34.1377	34.1604	34.0753	34.2619	34.2897	34.715	34.5354	34.1679	34.4146	34.1377	34.5296	34.2265	34.0512	34.5121	34.1679	34.3303	34.0911	34.1604	34.3892	34.2619	34.5584
ENO2	Gamma-enolase;Enolase	P09104;B7Z2X9;F5H0C8	30.0146	30.235	30.2534	30.0775	30.2496	30.2841		0.0629055	0.938486		0.0146236	0.989777		0.0307247	0.965452			0.914609		30.0349	29.8973	30.1115	30.1239	30.0608	30.5203	30.2535	29.9677	30.5389	30.1724	30.341	30.0608	29.7357	30.5109	30.1483	30.4134	29.9259	29.94	30.3724	30.2759	30.5481
ENOPH1	Enolase-phosphatase E1	D6RA00;Q9UHY7-2;Q9UHY7	25.8711	24.6127	26.2946	25.1809	25.9931	26.0473		-0.690193	0.884215		1.38043	0.798084		-0.247348	0.882567			0.837898		26.4425	25.5195	25.6513	22.3666	25.6403	25.8312	26.3712	26.1565	26.3562	26.2803	26.0254	25.3307	23.0873	25.1833	26.1469	26.3376	26.3049	26.3778	25.0894	26.3342	26.3877
ENOSF1	Mitochondrial enolase superfamily member 1	Q7L5Y1;A6NMP3;F5H1W8;B3KSL6;Q7L5Y1-2	23.1152	22.5125	23.8267	24.0008	26.9861	26.2962		0.885562	0.91126		4.47364	0.495446		2.46942	0.60596			0.361647		22.3236	23.376	23.6461	22.4086	22.0508	23.078	23.7347	23.4764	24.2691	22.8973	22.8322	27.7453	22.5284	27.7389	28.1214	23.8672	28.217	23.289	26.9539	27.5754	27.3662
ENPP4	Bis(5-adenosyl)-triphosphatase ENPP4	Q9Y6X5	24.9479	25.0355	25.2848	23.9261	24.2401	24.4017		-1.02179	0.836673		-0.795455	0.835239		-0.883104	0.664101			0.837858		24.8764	24.9271	25.0401	25.0894	24.8997	25.1174	25.2244	25.2856	25.3443	23.2456	22.2624	25.0359	25.1604	22.4675	24.6757	24.9406	24.8764	23.1697	25.0275	24.7338	24.6757
ENSA	Alpha-endosulfine	A6NMQ3;C9JUF4;Q5T5H1;O43768-2;O43768;E9PB69;O43768-3;O43768-4;O43768-6;O43768-5;O43768-7;D6RE62;O43768-8	27.2609	27.4076	27.4933	27.4902	27.424	27.3099		0.229353	0.801077		0.0164204	0.977624		-0.183407	0.794911			0.853568		27.1015	27.3745	27.3066	27.5014	27.2979	27.4234	27.4629	27.4707	27.5463	27.5682	27.6595	27.4707	27.2625	27.2535	27.4473	27.5014	27.4938	27.5315	27.5014	27.2979	26.9089
EOGT	EGF domain-specific O-linked N-acetylglucosamine transferase	Q5NDL2;A8K2U1;Q5NDL2-3;B4E243	26.166	25.9965	25.9279	26.1832	26.0622	26.1273		0.0172381	0.980249		0.0657436	0.950784		0.199451	0.866049			0.93897		26.1946	26.1469	26.1565	26.0148	26.0567	25.918	25.9517	25.8647	25.9672	26.0691	26.0975	26.065	26.5014	25.8904	26.1469	26.4676	25.7441	25.8069	26.5696	25.6918	26.441
EPB41	Protein 4.1	H3BLV6;P11171-2;P11171;P11171-4;P11171-3;E9PEX0;P11171-5;P11171-6;E9PEW9;C9JTS2;P11171-7	27.8059	28.1001	27.878	28.1748	28.0521	28.127		0.36886	0.790866		-0.0480785	0.961863		0.249028	0.672479			0.751751		28.066	27.5014	27.8504	28.0137	28.1263	28.1604	28.0914	27.611	27.9316	28.2123	28.3704	27.9089	28.2077	28.1361	27.8916	28.391	27.7895	28.1164	28.1115	28.3153	27.965
EPB41L3	Band 4.1-like protein 3;Band 4.1-like protein 3, N-terminally processed	A8K968;Q9Y2J2-2;Q9Y2J2;F5GX05;Q9Y2J2-3;E7EUF8;F5H7W5	24.829	24.9863	25.4988	25.1105	24.7827	24.8282		0.281545	0.830937		-0.203578	0.877589		-0.670569	0.352661			0.523124		24.8288	24.6264	25.0317	25.2961	24.275	25.3877	25.2244	25.6125	25.6595	25.3778	25.1871	25.0484	24.8288	24.6649	24.6703	24.9716	24.824	24.5812	25.0359	24.8717	24.824
EPHX2	Bifunctional epoxide hydrolase 2;Cytosolic epoxide hydrolase 2;Lipid-phosphate phosphatase	P34913;B4E1M2;E5RFU2;G3V134;E5RFH6	28.314	27.8479	28.021	28.0123	28.0049	28.0285		-0.30168	0.796171		0.156942	0.841408		0.00755898	0.994026			0.837551		28.0505	28.2354	28.6561	27.6181	27.8142	28.1115	27.6527	28.3494	28.0608	27.9977	28.0349	28.019	27.9977	28.1984	27.8623	27.8623	28.0965	27.9977	28.2399	27.6458	28.2308
EPN1	Epsin-1	Q9Y6I3-3;Q9Y6I3;Q9Y6I3-1;B4DU91	25.3405	25.9903	24.3593	25.1219	24.4018	25.6826		-0.218613	0.965962		-1.58853	0.773606		1.32329	0.657996			0.860244		25.8385	24.3493	25.8336	26.1371	25.5014	26.3325	25.824	24.2016	23.0523	26.3307	22.8317	25.3844	25.9406	22.4589	23.44	25.9694	25.7389	25.2714	26.0084	25.6784	25.772
EPRS	Bifunctional glutamate/proline--tRNA ligase;Glutamate--tRNA ligase;Proline--tRNA ligase	P07814	27.2799	27.2655	27.3936	27.3061	27.4547	27.5164		0.0261839	0.966331		0.189172	0.813689		0.122852	0.885065			0.891597		27.3066	27.2354	27.2979	26.9316	27.341	27.524	27.2077	27.341	27.632	27.1115	27.5389	27.4234	27.1507	27.4862	27.4473	27.4862	27.3992	27.3325	27.7645	27.217	27.7518
EPS15	Epidermal growth factor receptor substrate 15	P42566;B1AUU8	29.0217	29.0315	28.9856	29.201	29.2062	29.2545		0.179218	0.847818		0.174764	0.795266		0.268961	0.422772			0.732992		29.0349	29.0737	28.9567	28.9002	29.0531	29.141	28.9456	29.0711	28.94	29.362	29.4785	29.1189	28.8445	29.4053	29.0608	29.3239	29.0349	29.1842	29.4053	29.1483	29.2803
EPS15L1	Epidermal growth factor receptor substrate 15-like 1	A2RRF3;Q9UBC2;Q9UBC2-2	29.7237	29.8055	29.8044	29.8397	29.8612	29.8919		0.115988	0.857023		0.0557572	0.869167		0.0875597	0.791229			0.916064		29.708	29.6814	29.7818	29.7502	29.7849	29.8814	29.8623	29.6578	29.893	29.9259	30.0479	29.8096	29.5754	29.9539	29.7755	29.9814	29.7341	29.8127	29.8814	29.8653	30.0084
ERAP1	Endoplasmic reticulum aminopeptidase 1	Q9NZ08;Q9NZ08-2	29.8493	29.8099	29.7523	30.0445	29.9881	29.9101		0.195239	0.851056		0.17827	0.815785		0.157836	0.822296			0.892697		30.1115	29.995	29.4413	30.0084	29.8279	29.5934	30.0349	29.8066	29.4154	30.0084	30.0737	30.1842	29.9117	30.0479	29.9814	30.1604	29.7629	29.94	30.099	29.7645	29.837
ERAP2	Endoplasmic reticulum aminopeptidase 2	Q6P179-3;Q6P179	24.0077	23.3369	23.7315	23.2558	23.3082	23.3662		-0.751875	0.737364		-0.02865	0.992036		-0.365283	0.905629			0.920853		23.654	23.9847	24.3844	22.8443	23.6431	23.5232	23.5404	24.2096	23.4446	23.8481	23.3417	23.0421	22.7914	22.4155	23.6865	23.0837	24.0472	21.8782	24.5892	24.0624	22.9352
ERBB2IP	Protein LAP2	Q96RT1-7;Q96RT1-6;Q96RT1-4;Q96RT1-5;Q96RT1-3;E7EQW9;Q96RT1-2;Q96RT1;E9PCR8;B4DIP2	27.3646	27.1105	27.3424	27.1618	27.0272	27.1098		-0.202772	0.895861		-0.0833171	0.881823		-0.23264	0.870043			0.931736		27.3494	27.2891	27.4551	27.17	27.2077	26.9539	26.9539	27.8564	27.217	26.8504	27.1214	26.7895	27.8858	27.3066	26.9316	27.0084	26.8623	27.0296	27.4394	26.604	27.3662
ERC1	ELKS/Rab6-interacting/CAST family member 1	G8JLD3;Q8IUD2;Q8IUD2-3;F5H185;G8JLM9;Q8IUD2-4;Q8IUD2-2;F5H327;G8JLA4;Q8IUD2-5	25.2535	25.1783	25.0015	25.1005	24.6121	25.2068		-0.152913	0.872099		-0.566235	0.878117		0.205254	0.716258			0.938952		25.2058	25.217	25.3376	25.5195	25.0526	24.9628	24.8481	25.0233	25.1332	24.7234	25.3066	24.9977	25.3745	22.4775	25.1908	25.2785	25.5014	24.918	25.3273	25.2856	25.2961
ERLEC1	Endoplasmic reticulum lectin 1	B5MC72;Q96DZ1;Q96DZ1-2	25.3424	25.3903	25.6015	25.5121	25.5581	25.3262		0.169756	0.846671		0.167824	0.71784		-0.275292	0.710028			0.808468		25.3745	25.3811	25.2714	25.341	25.3376	25.4923	25.8552	25.5983	25.3511	25.7995	25.6264	25.2714	25.3511	25.6181	25.3811	25.632	25.6012	25.3239	25.2021	25.1332	25.6458
ERLIN2	Erlin-2	E5RHW4;O94905;E5RJ09	25.1717	24.9417	25.1114	24.5183	24.8104	24.8253		-0.653496	0.846519		-0.131297	0.912196		-0.286126	0.799818			0.914914		25.2207	25.002	25.2926	24.8997	24.824	25.1015	24.7945	25.391	25.1488	24.9361	24.8044	23.1082	25.2244	25.0484	24.6153	25.2678	24.3101	25.0526	24.895	24.2244	25.1293
ERO1LB	ERO1-like protein beta	Q86YB8;Q5TAE8	25.0471	24.7878	25.1956	25.0512	24.7359	24.8647		0.00404803	0.997933		-0.051902	0.989868		-0.330888	0.739229			0.972664		25.1795	25.0484	24.9134	24.7695	24.8811	24.7129	25.1604	25.2207	25.2058	24.7995	25.1681	25.0691	25.1681	22.9597	25.2535	25.2021	25.5285	25.1604	24.2815	25.1642	24.8528
ERP29	Endoplasmic reticulum resident protein 29	P30040;F8VY02	29.8828	29.91	29.9338	29.8125	29.8843	29.9294		-0.0702319	0.922523		-0.0257675	0.937374		-0.0043985	0.988703			0.962646		30.0737	29.6629	29.9117	29.8081	29.8741	30.0479	29.9814	29.8799	29.94	29.6475	29.8799	30.0479	29.6747	29.94	29.8858	29.8564	29.8549	29.8188	29.8973	29.8653	30.1361
ERP44	Endoplasmic reticulum resident protein 44	Q9BS26	29.6227	29.7299	29.67	29.4676	29.5263	29.5417		-0.155153	0.820014		-0.203608	0.664057		-0.128296	0.822376			0.715021		29.7373	29.6389	29.4919	29.6268	29.6714	29.8916	29.6389	29.632	29.7389	29.4862	29.4113	29.3599	29.6128	29.461	29.4842	29.651	29.509	29.5014	29.3044	29.8593	29.5014
ESAM	Endothelial cell-selective adhesion molecule	Q96AP7;F8WDW9	27.7228	28.0122	28.1519	27.7847	27.8134	27.9875		0.0618763	0.964513		-0.198774	0.842938		-0.164365	0.793943			0.842599		27.6865	27.4314	28.0505	28.1984	28.0864	27.7518	28.0453	28.4073	28.003	27.524	27.632	27.604	28.3787	28.1263	27.7325	27.509	27.8858	27.7833	28.1556	27.8799	28.1312
ESD	S-formylglutathione hydrolase	P10768;H7BZT7	29.9538	29.9909	30.0323	29.9485	30.0698	30.1531		-0.005301	0.9976		0.0789037	0.865972		0.120768	0.852615			0.914549		29.9259	29.9539	29.9814	30.0084	29.8653	30.099	30.1604	30.0479	29.8887	29.7581	30.196	30.2077	29.632	30.0737	30.1604	30.1842	29.8608	29.8682	30.393	30.0864	30.2647
ESYT1	Extended synaptotagmin-1	Q9BSJ8;Q9BSJ8-2;B3KY56	28.3547	28.6949	29.0203	28.2202	28.5293	28.5585		-0.134451	0.897866		-0.165565	0.836553		-0.461811	0.248462			0.215547		28.341	28.3992	28.3239	28.5646	28.5278	28.9923	28.8234	29.099	29.1386	28.019	28.1115	27.9923	28.7581	28.7129	28.2979	28.7195	28.3869	28.5609	28.6216	28.5052	28.5463
ESYT2	Extended synaptotagmin-2	H7BXI1;A0FGR8-2;A0FGR8;A0FGR8-6;C9JGI7;A0FGR8-4	25.3971	26.1698	26.466	25.0542	25.8423	26.0271		-0.342989	0.89749		-0.327474	0.79533		-0.438881	0.403388			0.252568		25.5075	25.1795	25.5045	25.772	26.3578	26.3795	26.4785	26.4488	26.4707	25.2207	23.7293	25.6209	25.6458	26.0588	26.0732	25.6676	25.5696	25.9089	26.3307	25.9716	25.8973
ETF1	Eukaryotic peptide chain release factor subunit 1	P62495;B7Z7P8;Q96CG1	28.6798	28.7267	28.6992	28.5678	28.7882	28.7876		-0.112024	0.891058		0.0614568	0.920264		0.0884705	0.872727			0.908785		28.7927	28.7227	28.524	28.6389	28.604	28.9372	28.7739	28.5718	28.7518	28.2262	28.6663	28.726	28.6527	28.9259	28.6764	28.9428	28.6075	28.6181	28.7708	28.6931	29.0686
ETFA	Electron transfer flavoprotein subunit alpha, mitochondrial	P13804;H0YLU7;P13804-2;H0YL12;H0YKF0;H0YK49;H0YNX6	28.0733	28.4492	28.573	28.5907	28.7901	28.6781		0.517425	0.76609		0.340899	0.802752		0.105138	0.90603			0.621664		28.0349	27.8741	28.3109	28.604	28.1361	28.6075	28.5969	28.7895	28.3325	28.4032	28.4629	28.3704	29.1263	29.21	28.8945	28.6898	28.3662	29.0004	28.6251	28.2759	28.8112
ETFB	Electron transfer flavoprotein subunit beta	P38117;P38117-2	26.744	27.181	27.1131	27.2471	27.4883	27.2396		0.503099	0.79462		0.307331	0.761677		0.126547	0.875099			0.547316		26.632	26.726	26.8741	27.3828	26.8623	27.2979	27.019	27.3662	26.9539	27.189	26.8504	27.141	27.8081	27.7708	27.5389	27.2445	27.3992	27.6181	27.1795	27.0296	27.1312
ETHE1	Persulfide dioxygenase ETHE1, mitochondrial	O95571	26.4015	26.7026	26.8849	26.7493	26.9129	26.6857		0.347858	0.798629		0.21026	0.843976		-0.199182	0.425513			0.588425		26.673	26.2058	26.3256	26.604	26.8858	26.6181	26.9089	26.9316	26.8142	26.6865	26.6181	26.632	27.0608	27.3828	26.8858	26.8264	26.5566	26.5653	26.6998	26.726	26.7518
EVI5L	EVI5-like protein	Q96CN4;Q96CN4-2	24.3102	24.1536	24.1606	24.152	24.3171	24.2365		-0.158233	0.958384		0.163499	0.84366		0.0758473	0.893053			1		23.9584	24.4738	24.4984	24.2821	24.1015	24.0772	24.4105	23.9225	24.1488	24.3511	24.9225	24.391	22.9432	24.2096	23.9933	24.7077	24.3578	24.3712	24.1719	24.2463	24.1565
EXOC1	Exocyst complex component 1	Q9NV70-2;Q9NV70	27.6193	27.4385	27.5249	27.4113	27.558	27.581		-0.207952	0.815905		0.119544	0.869332		0.056112	0.956755			0.951715		27.524	27.8324	27.5014	27.5014	27.141	27.673	27.5826	27.3325	27.6595	27.1795	27.391	27.4154	27.6595	27.7389	27.3662	27.6798	27.4473	27.3828	27.976	27.2262	27.7389
EXOC2	Exocyst complex component 2	Q96KP1	27.7091	27.5331	27.5107	27.7198	27.6085	27.6095		0.0107106	0.979657		0.0753989	0.832866		0.0988452	0.880235			0.829047		27.632	27.8564	27.6389	27.4234	27.4629	27.7129	27.2891	27.6389	27.604	27.6998	27.7518	27.632	27.7958	27.5609	27.5826	27.6865	27.604	27.3828	27.8324	27.5165	27.7064
EXOC3	Exocyst complex component 3	H7BXW1;O60645-2;Q6P2E8;O60645;D6RB59	27.1069	27.048	26.9141	27.19	27.1245	27.1449		0.0831097	0.897443		0.0764461	0.899342		0.230818	0.368887			0.790871		27.1115	27.1795	27.0296	27.1214	26.8623	27.1604	26.8019	26.9428	26.9977	27.2803	27.4154	27.1214	26.9428	27.2077	26.9539	27.3494	26.9869	27.0608	27.141	27.189	27.189
EXOC3L2	Exocyst complex component 3-like protein 2	Q2M3D2	22.801	23.4277	23.5078	23.3865	23.8187	23.9318		0.585512	0.817511		0.391052	0.878239		0.424056	0.601532			0.714863		23.2693	22.5357	22.5979	23.7796	22.9906	23.5128	23.0593	23.7251	23.7389	23.3775	23.8288	22.5803	23.7594	22.5579	24.8744	23.7314	24.1112	23.7852	24.0691	24.0443	23.8288
EXOC3L4	Exocyst complex component 3-like protein 4	Q17RC7	26.9116	26.9072	26.5777	26.947	26.8567	26.8112		0.0354656	0.930702		-0.0504545	0.963793		0.233496	0.711916			0.740805		26.8385	26.9202	26.976	26.673	27.0084	27.0401	26.673	26.7518	26.3084	27.0084	26.9089	26.7895	27.0813	26.8973	26.9539	26.5045	27.0711	27.0711	26.6865	26.8142	26.673
EXOC4	Exocyst complex component 4	Q96A65;B7Z321;F5H222;F5GZT1	26.7589	26.88	26.8172	27.0041	26.9636	27.0084		0.245249	0.776217		0.0836751	0.855974		0.191256	0.800765			0.849252		26.8741	26.5522	26.8504	26.7129	26.8973	27.0296	26.7771	26.7771	26.8973	26.9316	27.0914	27.1312	26.8623	26.9316	27.0296	27.0914	26.8019	26.7645	27.4234	26.7645	27.0813
EXOC5	Exocyst complex component 5	O00471;F8W9B8	27.0434	26.9348	26.9398	27.1081	27.3471	27.1533		0.0647238	0.93314		0.412253	0.618378		0.213531	0.802498			0.740264		26.8504	27.2714	27.0084	26.9202	26.9869	26.8973	26.726	27.2077	26.8858	27.3239	27.2262	26.8741	27.0084	27.7064	27.2891	27.1214	27.2714	27.2077	27.2354	26.7389	27.4314
EXOC6	Exocyst complex component 6	E7EW84;Q8TAG9;F2Z2Q3;E9PHI3;F2Z3K0	24.0051	23.5844	23.5072	23.9487	24.1035	23.9533		-0.0563447	0.97373		0.519158	0.825284		0.446119	0.759766			0.904581		23.7492	24.1095	24.1565	24.3031	23.6764	22.7735	24.0359	23.2961	23.1895	24.0526	24.0526	23.2283	24.4614	24.239	24.239	23.5917	24.3443	23.3046	24.0854	23.9933	24.4298
EXOC6B	Exocyst complex component 6B	Q9Y2D4;Q9Y2D4-2	25.6734	25.5496	25.7185	25.9387	25.7397	25.8212		0.265297	0.816762		0.190132	0.828757		0.102655	0.896208			0.853886		25.6784	26.0317	25.3101	25.239	25.6838	25.726	25.5492	25.8019	25.8044	25.8433	26.1642	25.8385	25.9089	25.604	25.9628	25.5926	25.7995	25.8481	25.9869	25.391	26.0588
EXOC7	Exocyst complex component 7	Q9UPT5-2;Q9UPT5-5;Q9UPT5-1;Q9UPT5-6;Q9UPT5;F5H1P1;F8W6Q7	26.7729	26.7266	26.6037	26.9777	26.9752	26.9406		0.204781	0.844827		0.248545	0.77475		0.336927	0.633449			0.756039		26.5285	26.976	26.8142	26.6595	26.4908	27.0296	26.4394	26.726	26.6458	26.632	27.2445	26.9428	27.0914	26.7645	27.1214	27.0608	26.9539	26.7895	26.8264	26.8142	27.3325
EXOC8	Exocyst complex component 8	Q8IYI6	26.6013	26.9072	26.5778	26.7853	26.7588	26.8968		0.183993	0.84847		-0.148468	0.852992		0.319029	0.600884			0.808202		26.8142	26.7129	26.2767	26.9316	26.8142	26.976	26.5696	26.5898	26.574	26.8019	26.604	26.8264	26.9089	27.0608	26.965	26.5667	26.4425	27.17	26.5898	26.7771	27.0505
EZR	Ezrin	P15311;E7EQR4	28.1704	28.0736	28.2989	28.2608	28.0052	28.249		0.0903608	0.971159		-0.0684091	0.990794		-0.0499008	0.983219			1		28.2399	29.027	27.2445	27.8564	28.7325	27.632	28.189	27.2803	29.4274	28.604	28.5128	28.267	27.6595	26.9869	29.1507	28.0813	27.8019	28.2354	28.258	27.611	28.8916
F11R	Junctional adhesion molecule A	B7Z5W1;Q9Y624;B7Z941	28.7268	28.9879	29.0879	28.6089	28.4919	28.6972		-0.11782	0.923083		-0.496048	0.602617		-0.390751	0.625968			0.592441		28.6181	28.9512	28.611	28.9372	29.2308	28.7958	28.7989	29.4354	29.0296	28.4976	28.1312	28.7129	29.094	28.6181	28.6004	28.1556	28.5934	28.9923	28.5898	28.6458	28.5609
F12	Coagulation factor XII;Coagulation factor XIIa heavy chain;Beta-factor XIIa part 1;Coagulation factor XIIa light chain	P00748	25.2515	25.3628	25.2519	25.1695	24.6033	24.8923		-0.0819815	0.970729		-0.759512	0.815262		-0.359653	0.890927			0.92272		25.3778	24.8997	25.4769	25.1604	25.2021	25.726	25.4583	24.4329	25.8647	25.6348	25.341	25.5344	24.1678	23.3864	25.6125	24.2656	25.1488	25.5014	25.4953	24.8481	23.7244
F13A1	Coagulation factor XIII A chain	P00488;F5H080	35.2867	35.4097	35.3745	35.3786	35.5039	35.4468		0.0919202	0.827622		0.0942135	0.840413		0.0722418	0.869179			0.825985		35.2689	35.3828	35.2084	35.2724	35.4241	35.5325	35.3203	35.4303	35.3731	35.3135	35.5062	35.4051	35.2897	35.6549	35.3796	35.595	35.386	35.2478	35.5062	35.4051	35.628
F2	Prothrombin;Activation peptide fragment 1;Activation peptide fragment 2;Thrombin light chain;Thrombin heavy chain	P00734;E9PIT3;C9JV37	28.1326	28.1923	28.1061	28.134	28.1424	28.0142		0.00135612	0.998201		-0.0498433	0.982005		-0.0919081	0.948371			1		27.9372	28.0453	28.4154	27.726	28.0864	28.7645	27.8623	28.1065	28.3494	28.0762	28.2803	27.9259	28.2535	28.2535	28.2077	28.217	27.8916	27.8445	28.1795	27.5389	28.4938
F5	Coagulation factor V;Coagulation factor V heavy chain;Coagulation factor V light chain	P12259	32.1489	32.0771	32.0982	32.0768	32.0751	32.0448		-0.0721421	0.913418		-0.00199461	0.997822		-0.0534034	0.925735			0.999388		32.2535	31.9539	32.2393	32.13	31.8792	32.2222	32.1901	32.0151	32.0896	32.0283	31.9435	32.005	32.3303	32.0927	31.9294	32.1422	32.1361	31.7965	32.1604	31.9746	32.2478
F8A1	Factor VIII intron 22 protein	P23610	26.6862	26.2827	26.664	26.4773	26.4319	26.4552		-0.208866	0.852946		0.149143	0.882148		-0.208838	0.789873			0.887069		26.7518	26.9539	26.3528	26.512	25.965	26.3712	26.5638	26.8385	26.5898	26.2553	26.7518	26.2426	26.6595	26.5898	26.2874	26.8019	26.0484	26.5898	26.4551	26.0629	26.7129
FABP5	Fatty acid-binding protein, epidermal	Q01469	28.1032	28.2446	28.4279	28.1821	28.1728	28.2367		0.0789601	0.948108		-0.071806	0.923501		-0.191193	0.637374			0.914682		28.1556	28.189	27.965	28.019	28.2714	28.4433	28.4976	28.3992	28.3869	28.2803	28.524	28.2445	27.6798	28.189	28.3869	28.2354	27.8799	28.203	28.4591	28.1984	28.0864
FADD	FAS-associated death domain protein	Q13158	26.0374	25.5447	25.708	25.6905	25.6904	25.7691		-0.346959	0.850023		0.145748	0.89418		0.0610592	0.905905			0.913264		26.5285	26.1507	25.433	25.918	25.2926	25.4234	25.5926	25.7569	25.7746	26.1312	25.4676	25.7364	25.4266	25.5195	25.7895	26.0914	25.3612	25.6622	25.7234	26.067	25.6237
FAF1	FAS-associated factor 1	Q9UNN5;B3KT28;B1ANM7;F5GZD2;Q9UNN5-2;B4DEJ6	25.2991	25.2046	25.1678	25.5224	25.3471	25.3432		0.22329	0.774896		0.14251	0.902517		0.175435	0.788266			0.883389		25.1214	25.5045	25.2714	24.8811	25.0813	25.6513	25.1833	25.3975	24.9225	25.5285	25.6209	25.5135	25.4266	25.797	25.1757	25.1371	25.2785	25.0935	25.3443	25.4831	25.452
FAH	Fumarylacetoacetase	P16930;Q53XA7	29.8756	29.5732	29.5597	29.809	29.8493	29.8199		-0.0666483	0.943813		0.2761	0.739972		0.260249	0.446571			0.680814		29.9539	30.0084	29.6646	29.8415	29.4073	29.4707	29.7146	29.4957	29.4688	29.9259	30.0479	29.8188	29.4433	30.0608	29.8385	29.8096	29.6881	29.8218	29.8829	29.8638	29.7113
FAM107B	Protein FAM107B	Q9H098;Q9H098-2;C9J6N5;C9JQ40;C9JW51;C9J3Q3;C9JYP1;C9J6Y8;C9JP05	24.7882	24.4869	24.9386	24.7943	24.6767	24.6271		0.00607729	0.996593		0.189809	0.869717		-0.311518	0.71797			0.913778		25.0567	24.6376	24.6703	24.0608	24.7846	24.6153	25.2426	24.9977	24.5754	24.6649	25.1871	24.9539	24.3712	24.4105	24.4234	25.1135	24.7594	24.6376	24.7695	24.2821	24.8191
FAM114A2	Protein FAM114A2	Q9NRY5;E7ESJ7;E5RGF9	27.4414	27.2406	27.1231	27.1256	27.2228	27.2294		-0.315783	0.688171		-0.0178714	0.991102		0.106323	0.885184			0.890983		27.4938	27.391	27.4394	27.4314	27.1015	27.189	26.9539	27.217	27.1984	27.0608	26.9977	27.1115	27.3325	26.8741	27.1312	27.6595	27.2262	26.9869	27.5754	27.3153	27.0401
FAM120A	Constitutive coactivator of PPAR-gamma-like protein 1	Q9NZB2;Q9NZB2-6;Q9NZB2-4	26.6338	26.717	26.7138	26.5044	26.4168	26.4797		-0.129464	0.87304		-0.30017	0.387975		-0.234106	0.604467			0.589901		26.4692	26.8142	26.6181	26.673	26.7389	26.7389	26.5754	26.8142	26.7518	26.4362	26.726	26.6181	26.2372	26.3511	26.2856	26.4754	26.5551	26.2767	26.5898	26.632	26.4202
FAM126A	Hyccin	Q9BYI3;B8ZZJ1;B8ZZA2;H7C0W7	25.6584	25.9236	26.144	25.9586	26.098	26.0441		0.300207	0.818371		0.174398	0.739756		-0.0999297	0.798791			0.366999		25.5983	25.9825	25.3943	25.7746	25.9089	26.0874	25.9271	26.2714	26.2335	25.8599	26.1565	25.8288	25.989	26.1253	26.2077	26.0484	26.0105	26.038	26.0813	25.9716	26.0854
FAM129A	Protein Niban	Q9BZQ8	26.7955	26.7149	26.7179	26.8154	26.917	26.8299		0.0198488	0.959107		0.202165	0.754825		0.111995	0.901752			0.927033		26.9089	26.7518	26.726	26.5682	26.726	26.8504	26.6595	26.632	26.8623	26.8264	26.7129	26.8019	26.9202	26.9977	26.965	26.6865	27.019	26.4707	27.1984	26.5898	27.0608
FAM136A	Protein FAM136A	E7EQY1;Q96C01;C9J2Y4	24.1096	24.7458	23.9591	24.3092	24.3983	24.1719		0.199564	0.962562		-0.347516	0.943518		0.212742	0.960286			0.99901		24.3844	24.6376	23.3069	25.1332	25.4394	23.6649	24.8288	24.6486	22.4	25.5433	25.3612	23.261	23.0713	22.9478	25.3679	23.5965	25.6811	25.2961	22.9953	25.1795	23.2165
FAM160B1	Protein FAM160B1	Q5W0V3;Q5W0V3-2	28.1686	28.0056	28.0786	28.1438	28.2576	28.224		-0.0247992	0.967149		0.251942	0.698802		0.145415	0.788302			0.837901		28.0762	28.1361	28.2935	28.0349	27.9316	28.0505	27.9539	28.2262	28.0557	28.3023	27.9031	28.1164	28.2535	28.4629	28.0137	28.3367	28.217	28.0711	28.1507	28.1842	28.49
FAM160B2	Protein FAM160B2	Q86V87;A6NNC3	24.0777	22.9219	23.1831	25.034	23.961	23.3325		0.956306	0.846811		1.03912	0.833865		0.149337	0.959753			0.70723		25.1371	24.5463	22.5496	24.2244	22.4606	22.0806	24.0481	22.8677	22.6337	25.8528	25.7441	23.4058	25.1332	25.6292	22.8016	24.1687	23.2444	23.1105	22.3415	24.7129	23.165
FAM175B	BRISC complex subunit Abro1	Q15018	26.0382	26.162	26.0144	26.1357	26.3159	26.3177		0.0975769	0.930279		0.1539	0.83885		0.303387	0.668516			0.849388		25.9248	26.2335	25.9562	26.2714	26.0854	26.1293	26.2207	25.8312	25.9912	26.4218	25.7895	25.8717	26.4598	26.3014	26.3861	26.0211	26.5551	26.5522	26.3629	26.3778	25.9781
FAM177A1	Protein FAM177A1	G3V583;Q8N128;Q8N128-2	25.017	26.1808	26.3169	24.7113	27.1165	26.0714		-0.305695	0.969371		0.935626	0.69944		-0.245555	0.95591			0.781561		26.2856	26.4567	22.3087	26.2335	26.3049	26.0041	26.019	26.4877	26.4441	24.2015	22.4707	25.8717	26.3014	26.6458	26.3861	27.8019	27.632	23.7176	26.0772	26.7389	27.7518
FAM195B	Protein FAM195B	I3L2L5;I3L4Q0;C9JLW8;I3L3A7;I3L317	23.9178	23.4713	23.7058	24.1832	24.5193	23.1004		0.265393	0.892213		1.04801	0.564655		-0.605422	0.771971			0.382949		24.317	23.5825	23.8537	23.1866	23.0077	24.2196	24.0359	22.8354	24.2463	24.3578	24.6486	24.3376	23.3887	24.4425	24.4413	24.5285	24.6649	23.1137	23.8385	22.4015	23.048
FAM213B	Prostamide/prostaglandin F synthase	Q8TBF2;Q8TBF2-3;Q8TBF2-4;Q8TBF2-2;Q8TBF2-5;Q8TBF2-7;Q8TBF2-6	27.7337	27.4805	27.5967	27.7287	27.4146	27.329		-0.00495799	0.997245		-0.0659043	0.947019		-0.26769	0.588			0.590694		27.673	28.019	27.509	27.3662	27.3494	27.726	27.604	27.4473	27.7389	27.726	27.7129	27.9595	27.5165	27.4234	27.2262	27.2445	27.7645	27.509	27.2803	27.1115	27.4154
FAM21A	WASH complex subunit FAM21B;WASH complex subunit FAM21A;WASH complex subunit FAM21C	F8W7U3;Q5SNT6;I3L0H6;Q641Q2;E7ESD2;I3L0C9;Q641Q2-2;F5H871;Q9Y4E1-3;F5H0J6;Q9Y4E1-2;Q9Y4E1;Q9Y4E1-4;Q5T1D7	26.3633	26.3819	26.2813	26.4283	26.5954	26.3791		0.0650247	0.914031		0.21348	0.841312		0.0978603	0.900608			0.912803		26.3393	26.2207	26.53	26.217	26.5492	26.3795	26.0935	26.4282	26.3222	26.2535	26.6458	26.4362	26.3778	27.019	26.3877	26.7895	26.1852	26.2096	26.5638	26.0567	26.6865
FAM3C	Protein FAM3C	Q92520	24.7452	24.7324	24.1785	23.5688	23.7822	24.2294		-1.17639	0.845869		-0.950188	0.837054		0.0508731	0.990809			0.955074		25.6891	22.6445	25.902	25.6403	23.0135	25.5433	23.512	26.3443	22.6792	23.2736	24.5099	22.4516	24.0403	24.0112	25.2463	23.6279	22.2434	23.9572	25.0148	25.2463	22.6993
FAM49B	Protein FAM49B	Q9NUQ9;E5RI16	27.822	27.7613	27.809	27.7375	27.6769	27.8691		-0.0845234	0.878238		-0.0843387	0.825512		0.0600875	0.901833			0.847601		27.8142	27.6595	27.9923	27.726	27.6663	27.8916	27.8081	27.6931	27.9259	27.7389	27.8799	27.6181	27.7129	27.6865	27.7581	27.5969	27.6663	27.6931	28.0557	27.7518	27.976
FAM63A	Protein FAM63A	Q8N5J2;Q8N5J2-3;Q8N5J2-4;Q8N5J2-2	29.4504	29.6134	29.5959	29.52	29.6462	29.7013		0.0695957	0.910999		0.0328037	0.963269		0.105351	0.676528			0.751435		29.4995	29.3869	29.4649	29.4174	29.5754	29.8474	29.5934	29.5573	29.6372	29.2935	29.7533	29.588	29.4453	29.7014	29.6424	29.7096	29.5315	29.5772	29.7014	29.7047	29.8218
FAM63B	Protein FAM63B	Q8NBR6-2;Q8NBR6;H0YLR1	24.6715	23.8852	24.4347	24.2206	24.7883	24.5662		-0.450988	0.879568		0.903093	0.792994		0.131524	0.95991			0.917528		24.7129	24.6865	24.6153	24.5105	22.4216	24.7234	24.4676	24.2961	24.5404	22.9091	24.6486	24.2678	25.0567	24.7846	24.867	24.9089	24.5926	24.8997	25.275	23.0544	25.0359
FAM65B	Protein FAM65B	Q9Y4F9;F5GX51	25.143	24.6281	23.9627	24.9806	23.3241	24.8588		-0.162364	0.906218		-1.30399	0.723452		0.896015	0.74765			0.410217		25.4583	25.1565	24.8142	24.3443	24.8858	24.654	24.3443	25.0567	22.4871	25.1871	25.0813	25.2244	24.4298	24.9539	22.6733	22.9265	22.7425	24.4362	25.1908	24.6096	25.1984
FAM65C	Protein FAM65C	F5H0X2;Q96MK2;Q96MK2-2	27.5948	27.6231	27.5253	27.8067	27.7613	27.6472		0.211911	0.808631		0.138206	0.840945		0.121975	0.706257			0.733939		27.5014	27.5898	27.6931	27.6527	27.3662	27.8504	27.4073	27.6595	27.509	27.7325	28.1214	27.6798	27.6931	27.8858	27.6251	27.7325	27.8019	27.673	27.6865	27.5165	27.7129
FAM89B	Protein FAM89B	E9PB01;Q8N5H3;E9PL72;Q8N5H3-2	23.2232	23.6177	23.0932	22.9083	23.9881	23.9789		-0.314924	0.852477		0.370393	0.756978		0.885614	0.538773			0.215488		23.4041	22.7625	23.503	23.7594	23.7796	23.3141	23.3253	22.971	22.9834	22.9179	22.6791	23.4546	22.5815	23.577	24.0359	24.1828	24.1565	24.6918	23.2015	23.9933	24.0288
FAM91A1	Protein FAM91A1	Q658Y4;E7ER68	26.1148	26.2024	26.3184	26.3214	26.2706	26.3286		0.206652	0.848817		0.0682141	0.949486		0.0101854	0.976616			0.927476		26.2408	26.1253	25.9781	25.9628	26.1234	26.521	26.2714	26.2589	26.425	26.1055	26.2225	26.2317	26.726	26.5045	26.1154	26.4266	26.0359	26.3629	26.2856	26.1738	26.4923
FAM98A	Protein FAM98A	E9PH82;Q8NCA5-2;Q8NCA5	25.7809	25.3683	25.8049	25.6663	24.424	23.656		-0.114604	0.825176		-0.944293	0.848033		-2.14888	0.540243			0.588081		25.6348	25.7945	25.9134	24.254	25.8858	25.965	25.7024	25.8264	25.8858	25.6944	25.6458	25.5404	25.7846	22.4088	25.9495	25.8336	23.5039	23.2533	23.0589	22.4541	25.8576
FARSA	Phenylalanine--tRNA ligase alpha subunit	Q9Y285;B4E363	26.6761	26.6103	26.4524	26.1248	26.2056	26.3164		-0.551296	0.684813		-0.404716	0.581682		-0.135946	0.895776			0.544954		26.5754	26.4551	26.9977	26.5754	26.4661	26.7895	26.6998	26.3612	26.2961	25.8834	26.1776	26.0752	26.3629	26.1908	26.1214	26.4536	26.0567	25.7619	26.512	26.3877	26.604
FARSB	Phenylalanine--tRNA ligase beta subunit	Q9NSD9;F5H6Y1	28.04	28.0238	27.8966	28.0224	27.9722	27.8933		-0.0176414	0.97982		-0.0516313	0.903292		-0.00321706	0.994267			0.916431		28.0296	28.0608	28.0296	27.9705	28.0608	28.0401	27.8445	27.8858	27.9595	27.8445	28.0557	28.3153	27.8741	27.9977	27.8142	28.1795	27.8973	27.8682	28.1065	27.7129	27.8858
FASN	Fatty acid synthase;[Acyl-carrier-protein] S-acetyltransferase;[Acyl-carrier-protein] S-malonyltransferase;3-oxoacyl-[acyl-carrier-protein] synthase;3-oxoacyl-[acyl-carrier-protein] reductase;3-hydroxyacyl-[acyl-carrier-protein] dehydratase;Enoyl-[acyl-carrier-protein] reductase;Oleoyl-[acyl-carrier-protein] hydrolase	P49327	31.3141	31.3215	31.3192	31.3587	31.4012	31.4167		0.0446814	0.816492		0.0796572	0.877619		0.097477	0.762531			0.922115		31.3088	31.341	31.2924	31.196	31.2814	31.4871	31.2478	31.2814	31.4284	31.3463	31.3303	31.4334	31.325	31.5527	31.2308	31.5343	31.2869	31.3515	31.4823	31.3033	31.5296
FBLN1	Fibulin-1	B1AHL2;P23142-4;F8W7M9;P23142-2;B1AHL4;P23142-3;P23142	23.7063	23.2407	23.7781	23.3591	24.0991	24.1226		-0.347227	0.864999		0.858425	0.598859		0.344445	0.900823			0.835784		23.2133	24.0105	23.895	23.8288	22.7473	23.146	23.654	25.2312	22.4491	23.1627	24.1869	23.1219	22.9647	23.8481	24.3443	24.002	24.2021	24.2021	23.9584	24.0691	24.2607
FBXL8	F-box/LRR-repeat protein 8	Q96CD0	22.3988	23.191	23.5285	23.3505	23.6507	23.334		0.951697	0.837004		0.459678	0.847042		-0.194467	0.595505			0.835163		20.6402	22.9579	23.5983	22.245	23.5285	23.7995	23.4041	23.5165	23.6649	23.5991	22.9921	23.0822	23.7286	23.7286	23.512	22.9842	24.3778	23.1932	23.2961	23.4298	23.417
FBXO7	F-box only protein 7	Q9Y3I1;Q5TI86;Q9Y3I1-2	26.074	25.6709	25.7258	25.9613	26.0964	25.9265		-0.11275	0.923254		0.425519	0.625274		0.200736	0.802714			0.790304		25.8694	26.1469	26.2058	25.5638	25.5983	25.8504	25.4953	26.0062	25.6757	26.0772	26.3256	26.0317	25.4105	26.4234	25.9539	25.9977	26.0105	26.0422	26.2021	25.5783	25.8834
FCER1G	High affinity immunoglobulin epsilon receptor subunit gamma	P30273	25.2456	24.812	24.1418	25.1246	25.7201	25.3723		-0.120955	0.98633		0.908173	0.873443		1.23048	0.861108			0.98541		26.7645	24.6782	24.2941	27.2625	22.7411	24.4322	22.4346	27.5165	22.4743	23.4509	23.0574	26.9089	27.0813	26.4089	23.7624	26.574	26.1352	23.8047	25.0526	26.2926	26.3393
FCGR2A	Low affinity immunoglobulin gamma Fc region receptor II-a;Low affinity immunoglobulin gamma Fc region receptor II-c	P12318-2;P12318;F5GXY9;F5GX41;P31995	24.604	25.3994	26.1112	24.1649	24.9606	23.3631		-0.439058	0.943291		-0.4388	0.946764		-2.74809	0.462358			0.744639		25.3943	22.9438	25.4738	26.48	26.2625	23.4556	25.9517	26.4661	25.9157	25.705	22.5113	25.228	23.2154	25.8166	25.239	22.757	26.0296	23.0088	22.8661	22.1317	25.4457
FDPS	Farnesyl pyrophosphate synthase	E9PCI9;P14324	29.0046	29.01	28.9319	29.0972	29.1749	29.2173		0.0926029	0.813899		0.164925	0.810065		0.285489	0.698184			0.790212		29.0322	28.9677	29.0137	28.8741	28.9002	29.2557	28.8973	28.6492	29.249	29.1483	29.17	29.1164	28.9539	29.1239	29.1819	29.341	29.0531	29.1532	29.1866	29.0608	29.4688
FER	Tyrosine-protein kinase Fer	P16591;P16591-2;P16591-3	25.5023	25.3978	25.2134	25.0675	25.702	25.5128		-0.43479	0.880343		0.304199	0.796029		0.299399	0.747182			0.89184		25.1449	25.6676	25.6944	24.9803	25.4923	25.7208	25.3679	25.228	25.0443	23.7645	25.7846	25.2785	25.4425	25.8361	25.5492	25.5463	25.8764	25.8741	25.5696	25.0148	25.5926
FERMT2	Fermitin family homolog 2	H0YJ34;Q96AC1-2;Q96AC1;Q96AC1-3	23.583	24.4356	24.3028	24.481	24.8076	24.5093		0.89799	0.818644		0.371968	0.633588		0.206477	0.871259			0.687103		22.468	25.0443	23.2367	24.4105	24.4923	24.4041	24.6649	24.3578	23.8858	24.6264	24.5869	24.1642	24.5463	25.065	24.8142	24.8528	24.4984	24.4862	25.0062	24.0526	24.4923
FERMT3	Fermitin family homolog 3	Q86UX7-2;Q86UX7;F5H1C6	35.8637	35.9646	35.8733	35.8866	35.9374	35.9832		0.022892	0.935705		-0.0271813	0.967429		0.109882	0.834854			0.931481		35.9374	35.8328	35.821	35.8352	35.9019	36.1566	35.9613	35.6549	36.0038	35.8375	35.9975	35.8928	35.8186	35.9613	35.8114	36.0592	35.9175	35.797	36.0793	35.9439	36.1126
FES	Tyrosine-protein kinase Fes/Fps	P07332;P07332-4;P07332-3;E7ENM8;P07332-2;E9PIJ7	25.8909	25.7718	25.9025	25.8034	25.9184	25.7743		-0.0874456	0.879411		0.146578	0.791536		-0.128184	0.876744			0.937303		25.9803	25.7077	25.9847	25.6096	25.772	25.9338	25.8191	26.2481	25.6403	25.7077	25.902	25.9338	25.6703	25.8528	25.8069	26.038	25.976	25.792	25.7846	25.5165	26.0041
FGA	Fibrinogen alpha chain;Fibrinopeptide A;Fibrinogen alpha chain	P02671;P02671-2	34.5877	34.7406	34.6617	34.6424	34.4313	34.3258		0.0547091	0.920641		-0.309342	0.619727		-0.335915	0.362294			0.234645		34.6198	34.5179	34.6253	34.5412	34.9505	34.7302	34.7252	34.5296	34.7302	34.7302	34.3698	34.6944	34.7751	34.3303	34.3892	34.5354	34.4702	34.1753	34.4146	34.3828	34.3303
FGB	Fibrinogen beta chain;Fibrinopeptide B;Fibrinogen beta chain	P02675;B4E1D3;D6REL8	35.2637	35.4354	35.4976	35.2159	35.1408	34.9793		-0.0478023	0.956229		-0.294607	0.671788		-0.518263	0.456522			0.369513		35.3236	35.1107	35.3568	35.2654	35.4853	35.5556	35.4611	35.4146	35.6171	35.212	34.9634	35.1938	35.4943	35.1641	34.9461	35.3698	35.0832	34.6629	35.0552	34.9374	35.2619
FGD3	FYVE, RhoGEF and PH domain-containing protein 3	Q5JSP0;F8W7P2;Q5JSP0-2	27.5043	27.3848	27.5767	27.6173	27.4785	27.3259		0.112995	0.913067		0.0936735	0.756824		-0.25077	0.671114			0.832361		27.2803	27.4938	27.7389	27.3494	27.3578	27.4473	27.6865	27.6527	27.391	27.2714	27.9372	27.7518	27.509	27.5826	27.3745	27.4785	27.4785	27.3066	27.5682	27.0711	27.3578
FGD4	FYVE, RhoGEF and PH domain-containing protein 4	B7Z493;E9PJX4;F8VWL3;Q96M96;F8W1R0;G3XA97	26.9652	26.8329	27.0389	26.9837	26.9672	27.0724		0.0185305	0.979155		0.134379	0.830071		0.0335204	0.958438			0.913702		27.0084	26.8264	27.0608	26.8741	26.6595	26.965	27.17	27.0608	26.8858	26.8858	27.3325	26.965	26.7518	27.1795	26.8264	26.9202	26.9428	27.0914	27.17	26.8019	27.2262
FGFR1OP2	FGFR1 oncogene partner 2	Q9NVK5-2;Q9NVK5	28.578	28.5116	28.4837	28.4481	28.4868	28.4201		-0.129864	0.857674		-0.0248704	0.989613		-0.0636226	0.864963			0.990636		28.6798	28.3578	28.6964	28.6998	28.267	28.5682	28.4433	28.6004	28.4073	28.3325	28.7195	28.3787	28.362	28.7549	28.1795	28.7864	28.2262	28.2891	28.4274	28.5646	28.3992
FGG	Fibrinogen gamma chain	P02679-2;P02679;C9JEU5;C9JC84	35.2229	35.3124	35.2946	35.1	35.0405	34.9019		-0.122897	0.816323		-0.271913	0.624771		-0.392701	0.532234			0.374873		35.2229	35.2157	35.2301	35.2689	35.2443	35.4241	35.1377	35.3033	35.4427	35.1975	34.9197	35.0348	35.2478	35.0673	34.8281	35.1716	35.0951	34.684	34.9063	34.78	35.2372
FH	Fumarate hydratase, mitochondrial	P07954-2;P07954	26.9069	27.0556	27.3959	27.2885	27.2665	27.3987		0.381641	0.62769		0.210878	0.672599		0.00276295	0.995204		+	0.0267257		26.8142	26.9977	26.9089	27.1115	26.9539	27.1015	27.217	27.5315	27.4394	27.2354	27.2803	27.2891	27.3494	27.4551	27.1312	27.2262	27.2535	27.2891	27.3494	27.4473	27.509
FHL1	Four and a half LIM domains protein 1	Q13642-1;F5GWR5;Q13642-5;Q13642-4;Q5JXI8;B7Z5V0;B7Z6U8;Q13642;Q5JXH8;Q5JXH7;Q5JXI3;Q13642-3;Q5JXH9;Q5JXI2;Q5JXI0	31.8571	32.2099	32.1396	32.0608	31.9666	32.028		0.203649	0.744126		-0.243344	0.795299		-0.111634	0.821477			0.699788		31.8645	31.8571	31.8497	32.1021	32.3672	32.1604	31.995	32.225	32.1989	31.9294	31.9882	32.2077	32.1177	31.6415	32.1694	32.1872	31.8682	31.8119	31.9916	32.0864	32.2222
FHL2	Four and a half LIM domains protein 2	Q14192	26.4424	26.2813	26.3479	26.2094	26.3874	26.2852		-0.233016	0.848825		0.10604	0.887619		-0.0627038	0.956545			0.975563		26.3645	26.6595	26.3031	26.1115	26.5045	26.228	25.9089	26.2607	26.8741	26.4394	26.2961	26.3325	25.7695	26.4862	26.0833	26.6595	26.3205	26.0338	26.4314	26.1908	26.4846
FHL3	Four and a half LIM domains protein 3	Q13643	25.8453	25.9578	25.9299	25.9891	25.5034	25.5168		0.143793	0.910006		-0.454472	0.699773		-0.4131	0.7927			0.817328		25.7569	26.0401	25.7389	26.0443	26.0547	25.7746	25.6096	26.3084	25.8717	26.2767	26.275	25.9716	25.433	25.1371	25.7182	25.3101	25.8481	25.9606	25.1795	26.0275	24.8997
FHOD1	FH1/FH2 domain-containing protein 1	Q9Y613;B4DVN5	31.3153	31.5108	31.4529	31.4082	31.4651	31.5156		0.0928413	0.846505		-0.045675	0.950271		0.0627022	0.892875			0.893195		31.3515	31.341	31.2535	31.4234	31.4334	31.6756	31.4871	31.4532	31.4184	31.4334	31.4871	31.4871	31.225	31.6066	31.2193	31.6415	31.393	31.2535	31.6458	31.6242	31.5389
FIBP	Acidic fibroblast growth factor intracellular-binding protein	O43427-2;O43427;H0YCE7;E9PSD3	26.2061	26.3458	26.5284	26.6486	26.4542	26.5885		0.442474	0.846737		0.108372	0.843876		0.0600158	0.948454			0.913978		25.3645	26.9316	26.3222	26.4441	26.2372	26.3562	26.673	26.5478	26.3645	26.4298	26.6458	26.5536	26.965	26.5389	26.2803	26.3795	26.6181	26.228	26.6595	26.604	26.8623
FIS1	Mitochondrial fission 1 protein	Q9Y3D6	25.4841	25.1604	25.2349	25.7003	25.7955	25.5314		0.216165	0.896222		0.635093	0.640667		0.296479	0.798672			0.760559		25.0772	25.8647	25.5105	25.5045	24.7895	25.1871	24.9933	25.3205	25.391	26.0275	26.1055	25.3239	25.3443	26.1946	25.6784	25.4488	25.8599	26.0752	25.5492	24.9847	25.5165
FKBP15	FK506-binding protein 15	Q5T1M5;Q5T1M5-2	26.5564	26.77	26.7479	26.7571	26.6583	26.6761		0.200653	0.74178		-0.111689	0.88443		-0.0717688	0.889218			0.912323		26.5696	26.632	26.4676	26.5898	26.6595	27.0608	26.5075	26.8858	26.8504	26.5898	26.8741	26.8385	26.726	26.965	26.4186	26.6458	26.604	26.604	26.8504	26.632	26.6181
FKBP1A	Peptidyl-prolyl cis-trans isomerase FKBP1A;Peptidyl-prolyl cis-trans isomerase	P62942;Q1JUQ5;Q5W0X3;A8MSS1;Q5VVH2	29.3011	29.2861	29.1583	29.3338	29.3476	29.2958		0.0326869	0.977659		0.0614891	0.97109		0.137478	0.820488			0.996674		29.2193	29.4374	29.2467	29.6268	28.6798	29.5518	29.3109	28.8294	29.3346	29.2803	29.7549	28.8887	29.4113	29.3023	29.3704	29.4134	29.3044	29.3992	29.3303	29.189	29.2647
FKBP2	Peptidyl-prolyl cis-trans isomerase FKBP2;Peptidyl-prolyl cis-trans isomerase	P26885;F5H0N4	29.2318	29.3776	29.5577	29.1632	29.2947	29.3823		-0.0685794	0.919532		-0.0829372	0.923051		-0.175422	0.623834			0.696179		29.3807	29.0839	29.2308	29.2935	29.3153	29.524	29.604	29.3828	29.6865	29.0686	29.4551	29.1532	28.976	29.6093	29.1628	29.461	28.9456	29.3001	29.4113	29.3452	29.4727
FKBP3	Peptidyl-prolyl cis-trans isomerase FKBP3	Q00688	28.1762	27.8464	28.0449	28.0632	27.8547	28.0355		-0.113	0.916696		0.00828536	0.989944		-0.00939687	0.992976			0.914655		27.9977	28.0914	28.4394	27.7389	27.9089	27.8916	28.0914	28.019	28.0243	28.524	27.8019	28.0762	27.8504	28.0349	27.9146	27.6251	27.8445	28.0762	27.8799	28.6251	27.5609
FKBP4	Peptidyl-prolyl cis-trans isomerase FKBP4;Peptidyl-prolyl cis-trans isomerase FKBP4, N-terminally processed	Q02790	24.7278	24.6842	23.9892	23.5047	24.5368	24.2324		-1.22315	0.824488		-0.147347	0.944493		0.243198	0.955994			0.909588		24.918	24.8811	24.3844	24.7895	24.6703	24.5926	25.0359	23.3097	23.622	25.1293	22.3783	23.3464	23.1648	23.7707	24.2244	25.1719	24.9803	24.9847	21.8468	25.3135	24.7846
FKBP5	Peptidyl-prolyl cis-trans isomerase FKBP5;Peptidyl-prolyl cis-trans isomerase FKBP5, N-terminally processed	B7Z8G2;Q13451;B7Z7Z8	26.1343	26.0177	26.1952	25.9784	26.0224	26.0543		-0.155859	0.897928		0.00476265	0.999198		-0.140934	0.805369			0.996782		26.1527	26.2058	26.0443	26.1115	26.0793	25.8623	26.2944	26.2408	26.0505	25.9361	25.4394	26.3894	26.1488	25.2207	26.0148	26.3066	26.5478	26.1214	25.7312	26.189	26.1757
FLAD1	FAD synthase;Molybdenum cofactor biosynthesis protein-like region;FAD synthase region	Q8NFF5-3;Q8NFF5-2;Q8NFF5;Q5T196	24.6666	24.2839	24.3644	24.0783	24.4048	24.3951		-0.58831	0.859502		0.120881	0.923533		0.0307077	0.958876			0.947953		24.8336	24.6376	24.5285	24.3239	24.0854	24.4425	24.3712	24.4614	24.2607	22.4765	24.6811	24.7129	24.4425	24.824	24.6703	24.2961	23.8288	24.6811	24.4362	24.217	24.2463
FLII	Protein flightless-1 homolog	Q13045;F5H407	31.2937	31.2556	31.1915	31.3492	31.4206	31.3073		0.0555229	0.895157		0.165074	0.493483		0.115811	0.67247			0.521482		31.2535	31.4083	31.2193	31.225	31.1901	31.3515	31.1544	31.2478	31.1724	31.2591	31.5203	31.3196	31.2979	31.4532	31.3879	31.3982	31.4433	31.2019	31.4134	31.2365	31.3776
FLNA	Filamin-A	P21333-2;P21333;Q5HY54	36.9792	37.0792	37.067	37.0364	37.0643	37.1088		0.0572666	0.847459		-0.0149542	0.975826		0.0417741	0.884253			0.885756		37.0773	36.886	36.9742	37.0572	37.0163	37.1641	37.0872	37.0266	37.0872	37.0369	37.0059	37.097	37.0059	37.1262	37.0266	37.1735	36.9308	37.097	37.1735	36.9634	37.2011
FLNB	Filamin-B	O75369-6;O75369-3;O75369-2;O75369-9;O75369;O75369-8	28.1543	25.111	25.134	27.5538	24.53	26.0125		-0.600565	0.955647		-0.580914	0.967886		0.878595	0.929887			0.861266		29.3578	26.2607	28.8445	28.8712	23.6358	22.8259	28.3787	23.4048	23.6184	23.5672	29.1724	29.0401	28.4354	22.6783	22.8831	28.6216	23.9373	23.6349	23.5138	28.4862	28.4154
FLOT1	Flotillin-1	O75955;B4DVY7;B0V109;A2AB10;F8VSI6;A2AB12	27.8626	27.9401	27.9739	28.0075	27.6647	27.7913		0.144855	0.835939		-0.275414	0.709681		-0.182589	0.624586			0.531249		27.8504	27.6663	28.0711	27.9595	27.7645	28.0965	27.976	28.003	27.9428	28.1361	28.0762	27.8916	27.9259	27.8741	27.7195	27.6181	27.4473	27.7129	27.6181	27.8916	27.9428
FLOT2	Flotillin-2	E7EMK3;Q14254	25.7707	25.742	26.0505	25.2685	24.0534	25.2109		-0.502139	0.813055		-1.68861	0.643142		-0.83963	0.40294			0.210379		25.6209	25.6595	26.0317	25.6622	25.7645	25.7995	25.8647	26.2891	25.9977	25.4008	24.4547	25.6376	25.5812	25.433	24.4232	22.9659	23.3916	25.1871	25.5433	24.7286	25.3844
FN1	Fibronectin;Anastellin;Ugl-Y1;Ugl-Y2;Ugl-Y3	E7ERA1;P02751-6;E9PE77;P02751-3;P02751-11;P02751;P02751-7;P02751-15;P02751-12;P02751-10;P02751-5;P02751-9;P02751-14;P02751-13;P02751-8;F8W7G7;P02751-4;E9PG29	29.9521	30.0768	30.0817	29.6307	29.5946	29.3797		-0.32141	0.799497		-0.482227	0.309865		-0.70199	0.335212			0.0702239		29.995	29.8004	30.0608	29.9539	29.9677	30.3088	30.1483	29.788	30.3088	29.5203	29.4113	29.5826	30.0084	29.5682	29.6022	29.5969	29.611	29.2759	29.5052	29.2007	29.5371
FN3K	Fructosamine-3-kinase	Q9H479;B3KNR9;B4DH12	29.5694	29.5722	29.3559	29.2753	29.4362	29.4099		-0.294111	0.817425		-0.135953	0.839195		0.0539908	0.879825			0.770474		29.5591	29.7096	29.4394	29.7469	29.4214	29.5481	29.3766	29.4649	29.2262	29.17	29.3951	29.5628	28.9732	29.4881	29.3001	29.2602	29.6964	29.461	29.2935	29.3704	29.5146
FN3KRP	Ketosamine-3-kinase	Q9HA64;F5H4E4	26.3216	26.0267	26.125	26.2613	25.7941	25.7411		-0.0602763	0.911071		-0.232645	0.914182		-0.383897	0.860994			0.912807		26.17	26.3762	26.4186	26.1449	25.5492	26.3861	26.0813	26.3222	25.9716	26.1661	26.4707	26.1585	26.2499	24.7338	25.9803	26.1095	26.3528	24.6315	26.3595	25.604	26.3695
FNBP1L	Formin-binding protein 1-like	Q5T0N5-3;Q5T0N5-4;Q5T0N5-2;Q5T0N5-5;Q5T0N5	25.5736	25.1791	25.1955	25.6093	25.4316	25.3509		0.0356622	0.97606		0.252535	0.774628		0.15545	0.886821			0.790542		25.8336	25.3205	25.5667	25.1488	24.9271	25.4614	25.4831	24.6264	25.4769	25.2891	25.7995	25.8997	25.4488	25.6181	25.5344	25.3205	25.2535	25.5404	25.2535	25.3745	25.2354
FNIP2	Folliculin-interacting protein 2	Q9P278;Q9P278-2;D6RFH5	26.9738	27.247	25.6128	26.3399	25.8915	25.3654		-0.633942	0.907689		-1.35542	0.835514		-0.247453	0.970544			0.939848		26.8973	27.0813	26.9428	26.8623	27.2535	27.6251	22.7703	27.0813	26.9869	27.3992	27.019	27.2803	23.661	22.1474	27.4234	26.9977	26.9977	28.391	22.6305	26.4583	23.9817
FNTA	Protein farnesyltransferase/geranylgeranyltransferase type-1 subunit alpha	P49354;E9PQP6;P49354-2	26.9399	26.8337	26.8739	26.7482	26.9568	26.9853		-0.19169	0.846173		0.123136	0.868698		0.111391	0.906192			0.935928		26.7389	27.1604	26.9202	26.4457	26.9539	27.1015	26.9428	26.6181	27.0608	26.5898	27.0711	26.632	26.6998	26.9977	26.965	27.0505	26.8142	26.7895	27.2445	26.6181	27.2891
FNTB	Protein farnesyltransferase subunit beta	B4DL54;H0YHI0;B4E1A0;P49356;B3KSC2	25.8293	25.3161	25.7302	25.6671	25.8243	25.7456		-0.162117	0.894643		0.50826	0.638298		0.0154533	0.991595			0.898003		25.4394	25.867	26.1814	24.976	25.6622	25.3101	25.2354	26.1507	25.8044	25.976	25.8044	25.4457	25.4425	26.0127	25.9672	25.5812	25.7364	25.1253	25.8336	25.6944	26.329
FOCAD	Focadhesin	Q5VW36	25.8045	25.511	25.5785	25.5219	25.4044	25.3405		-0.282542	0.818559		-0.106614	0.915423		-0.238014	0.79116			0.840073		25.989	25.8433	25.5812	25.1527	25.9316	25.4488	25.6153	25.7492	25.3712	25.4583	25.7796	25.705	25.1449	25.217	25.5255	25.6181	25.2571	25.5105	25.5983	24.8623	25.391
FRMD4B	FERM domain-containing protein 4B	E9PGA7;F5H6F3;Q9Y2L6-2;Q9Y2L6	27.6037	27.7318	27.6668	27.765	27.7582	27.7295		0.161295	0.848724		0.0263928	0.965178		0.0627073	0.947303			0.969657		27.673	27.3992	27.7389	27.6998	27.5754	27.9202	27.7895	27.2625	27.9484	27.8264	27.9539	27.8324	27.4473	27.7645	27.6931	27.8623	27.7129	27.6865	27.6663	27.7389	27.8264
FRY	Protein furry homolog	Q5TBA9	22.8714	23.1665	22.5195	23.2944	23.5477	22.7393		0.423056	0.885943		0.381189	0.83671		0.219842	0.625799			0.672053		22.8559	22.9085	22.8497	23.6608	23.232	22.6067	22.5763	22.4591	22.5231	23.1158	24.654	22.6203	22.7877	22.9079	23.9457	24.0025	23.3347	22.7815	22.5912	22.9764	22.6081
FRYL	Protein furry homolog-like	F5GX82;O94915;F2Z2S2	27.4769	27.1086	27.149	26.9022	27.2017	27.0538		-0.574705	0.801845		0.0930429	0.981694		-0.0951921	0.966416			0.980296		27.4629	27.7325	27.2354	27.1795	27.2262	26.9202	26.8973	27.4785	27.0711	26.6595	27.0914	26.3795	27.4785	26.6458	27.3153	28.4862	26.3595	27.5609	25.797	27.9484	26.9089
FSCN1	Fascin	Q16658	24.73	24.3331	25.038	24.0624	23.6044	24.3055		-0.667582	0.911233		-0.728706	0.855449		-0.732493	0.817611			0.924933		23.0983	25.4707	25.6209	23.1632	25.2678	24.5682	24.2048	25.4953	25.4138	23.0938	25.3778	22.3417	25.4362	23.4166	25.3975	23.158	22.4454	25.417	23.1362	23.5121	25.1565
FSTL1	Follistatin-related protein 1	Q12841;B4DTT5;B4DTZ8	26.5581	26.2925	26.4462	26.4537	26.2326	26.1715		-0.104418	0.914807		-0.059964	0.971459		-0.274711	0.797368			0.908158		26.8264	26.2299	26.6181	26.7645	25.945	26.1681	26.9316	26.1681	26.239	26.533	26.2354	26.3205	26.726	25.945	26.3695	26.1234	26.4923	26.2996	25.9998	26.4938	25.8927
FTH1	Ferritin heavy chain;Ferritin heavy chain, N-terminally processed;Ferritin	P02794;E9PRK8;E9PKY7;G3V192;E9PPQ4;G3V1D1	23.5567	23.5518	22.9514	23.9402	23.6283	23.5377		0.383536	0.914275		0.0764777	0.984345		0.586233	0.775985			0.919794		22.2069	24.0526	24.4105	23.3511	23.4298	23.8745	23.5231	22.3247	23.0065	24.8667	23.3432	23.5404	24.0105	24.391	24.1174	22.6132	23.3915	23.8191	24.1113	23.6757	22.5445
FUCA1	Tissue alpha-L-fucosidase	P04066	23.467	22.5947	22.9681	23.5706	23.0886	23.1574		0.103577	0.957657		0.493919	0.848808		0.189352	0.943256			0.860949		23.2678	23.3239	23.8093	22.817	22.4346	22.5324	22.7576	23.0084	23.1382	23.0953	23.915	23.1787	24.0935	22.3001	23.976	22.1558	23.9225	23.48	23.5285	23.7211	21.9
FUT8	Alpha-(1,6)-fucosyltransferase	Q9BYC5;G3XAD2;Q9BYC5-2;G3V5N0	25.1754	24.1712	25.0354	25.2449	25.3019	25.1982		0.0694332	0.961358		1.13072	0.7111		0.162836	0.717047			0.58823		25.6264	24.7746	25.1253	24.8904	22.942	24.6811	25.1371	24.9628	25.0062	25.2058	25.0975	24.945	25.7312	25.4551	24.7543	25.3745	25.6237	25.1214	25.4614	25.0691	25.141
FXR1	Fragile X mental retardation syndrome-related protein 1	B4DXZ6;P51114;E9PFF5;P51114-3;P51114-2;E7EU85	24.6425	24.2985	24.8872	24.6587	24.0926	24.5034		0.0162249	0.983542		-0.205898	0.943409		-0.383743	0.792914			0.83801		24.6811	24.3376	24.9089	23.4354	24.6264	24.8336	25.239	24.8528	24.5696	24.7286	24.4984	24.7594	24.6486	24.6918	24.217	24.2891	23.1726	24.275	25.1984	23.942	24.5983
FYB	FYN-binding protein	O15117-2;B4DLN2;O15117;F5H8I8	31.229	31.1689	31.3261	31.2382	31.1619	31.1797		0.00921106	0.986551		-0.00701714	0.991004		-0.146428	0.745365			0.911758		31.4083	31.0084	31.2703	31.13	31.1177	31.2591	31.4532	31.1842	31.341	31.1544	31.2759	31.3033	31.2193	31.2077	30.947	31.3088	31.1842	31.0349	31.1783	31.3879	31.1177
FYCO1	FYVE and coiled-coil domain-containing protein 1	Q9BQS8;B7ZKT7	26.3785	26.359	26.1681	26.487	26.2238	26.3334		0.108451	0.855047		-0.135137	0.843451		0.165307	0.823089			0.823378		26.452	26.3342	26.3494	26.17	26.4024	26.5045	25.9517	26.2408	26.3118	26.4346	26.5165	26.7129	26.2838	26.204	26.2732	25.9803	26.4378	26.527	26.0975	26.1194	26.5898
FYN	Non-specific protein-tyrosine kinase;Tyrosine-protein kinase Fyn	Q5R3A8;B3KPS6;P06241-2;P06241-3;P06241	25.8165	25.7694	26.2365	26.012	25.8363	25.7333		0.195467	0.913304		0.0669344	0.949416		-0.503255	0.661447			0.890157		25.965	26.1814	25.3031	25.7619	25.9338	25.6125	25.9562	26.632	26.1214	26.0588	25.4202	26.0629	26.506	26.0874	25.6153	26.0935	25.5492	26.2354	25.5754	25.3477	25.7746
G3BP1	Ras GTPase-activating protein-binding protein 1	Q13283;F5H4D6	26.8262	26.6482	26.8896	26.8579	26.789	26.9644		0.0316335	0.975852		0.140831	0.773321		0.0748116	0.906484			0.860847		26.8741	26.9316	26.673	26.4723	26.8264	26.6458	26.6458	27.0914	26.9316	26.4394	26.8623	27.0084	27.1214	26.7389	26.7895	26.7771	26.8504	26.8623	27.2262	26.9428	26.8264
G3BP2	Ras GTPase-activating protein-binding protein 2	Q9UN86-2;Q9UN86	24.4464	25.1777	24.5123	25.1699	24.8339	24.7078		0.72341	0.859718		-0.343811	0.837327		0.195461	0.964797			0.97801		25.2354	22.5905	25.5135	25.1332	25.2785	25.1214	25.391	22.4811	25.6649	25.1449	25.5195	24.895	25.1199	25.4425	25.0526	24.8528	23.9877	25.3645	23.0695	25.1293	25.2678
G6B	Protein G6b	B0UXC5;O95866-2;O95866-4;O95866-7;B7ZLJ5;O95866-6	29.6737	29.6898	29.816	28.9907	28.9636	29.1745		-0.683067	0.781933		-0.726146	0.385637		-0.641468	0.24914			0.19582		29.5052	29.6389	29.877	29.6814	29.7047	29.6831	29.8035	29.8959	29.7486	28.7927	28.3704	29.1015	29.6981	28.9484	29.3745	28.6663	28.8653	29.0084	29.4453	29.0864	29.158
G6PD	Glucose-6-phosphate 1-dehydrogenase	P11413;P11413-2;P11413-3;E9PD92	31.9705	32.0932	32.1431	31.9942	32.0148	31.9735		0.0237001	0.955033		-0.0783331	0.8656		-0.169534	0.724295			0.884364		32.0705	31.9294	31.9117	32.0896	31.9365	32.2535	32.2647	31.9081	32.2563	32.0673	31.9505	32.08	31.8792	32.0705	31.9505	32.1483	31.8901	31.9574	32.0479	31.8119	32.0769
GABARAPL2	Gamma-aminobutyric acid receptor-associated protein-like 2	H3BSM5;P60520;H3BQ50	22.425	22.7458	25.1268	23.5178	23.9717	24.2187		1.09279	0.802204		1.22589	0.709196		-0.908092	0.707075			0.215958		22.7208	21.7505	22.8037	23.1835	22.7546	22.2993	24.8528	25.1833	25.3443	24.1896	22.9469	24.3101	22.6246	23.0518	24.918	23.2939	24.623	24.7695	25.2133	23.1001	23.792
GAK	Cyclin-G-associated kinase	O14976;E9PGR2	27.4122	27.2189	27.3647	27.3188	27.404	27.3731		-0.0933746	0.859625		0.185106	0.707692		0.00837151	0.986933			0.917431		27.4394	27.4394	27.3578	27.217	27.1507	27.2891	27.2077	27.4629	27.4234	27.3745	27.4785	27.0813	27.341	27.611	27.3578	27.3494	27.2979	27.1507	27.6251	27.2535	27.4629
GALK1	Galactokinase	P51570;A6NJD0	27.5257	27.2719	27.2624	27.3736	27.5231	27.4584		-0.152119	0.818814		0.251218	0.705545		0.196086	0.603229			0.592598		27.5898	27.5165	27.4707	27.17	27.1984	27.4473	27.2535	27.2445	27.2891	27.4551	27.5463	27.3325	27.1604	27.7518	27.4785	27.4629	27.3992	27.5609	27.4785	27.2262	27.5682
GALK2	N-acetylgalactosamine kinase	B7ZAX5;Q01415-2;Q01415	26.5991	26.4472	26.5122	26.4883	26.4772	26.5193		-0.110878	0.932064		0.0300309	0.951238		0.00713476	0.987058			0.999847		26.8741	26.1214	26.8019	26.3528	26.441	26.5478	26.2979	26.6865	26.5522	26.7389	26.6595	26.4551	26.0995	26.5014	26.3031	26.4862	26.6181	26.4892	26.3662	26.5898	26.632
GALM	Aldose 1-epimerase	Q96C23;B8ZZ75;H7C1B5	25.6254	25.7202	25.8295	25.8373	25.8835	26.0587		0.211878	0.815518		0.163288	0.835996		0.22929	0.691418			0.688744		25.797	25.2996	25.7796	25.8093	25.4041	25.9473	25.8576	25.8044	25.8264	25.9955	25.8457	25.7846	25.7234	25.902	26.038	25.976	25.6181	26.3239	25.965	26.1565	25.7895
GALNT2	Polypeptide N-acetylgalactosaminyltransferase;Polypeptide N-acetylgalactosaminyltransferase 2;Polypeptide N-acetylgalactosaminyltransferase 2 soluble form	G3V1S6;Q10471;F5GYB2	25.4986	25.1494	25.406	25.2406	24.4434	24.9393		-0.258022	0.860976		-0.706053	0.84444		-0.466658	0.489263			0.78032		25.9111	25.3975	25.1871	25.5812	24.6209	25.2463	25.3101	25.3645	25.5433	25.5165	24.7441	25.1642	25.5374	22.7062	24.976	25.2244	24.867	24.6486	24.8858	24.9803	25.2426
GALT	Galactose-1-phosphate uridylyltransferase	P07902;G3V4G9;G3V3U5;G3V223;F2Z2X9	25.3439	25.66	25.5271	25.4468	25.4215	25.4584		0.102909	0.955407		-0.238472	0.835895		-0.0687105	0.964857			0.998965		25.2821	25.4362	25.3135	25.632	25.7871	25.5609	25.6096	25.5135	25.4583	25.7518	25.2244	24.8093	26.002	25.2856	24.8904	25.867	25.6431	25.7077	24.5225	25.3645	26.239
GAMT	Guanidinoacetate N-methyltransferase	Q14353;Q14353-2	26.4993	26.4136	26.2808	26.5343	26.4937	26.4136		0.0350717	0.977074		0.0801229	0.966734		0.132856	0.895587			0.990796		26.5419	26.3662	26.5898	26.4567	26.0711	26.7129	26.3118	26.1527	26.3778	26.0711	26.8385	26.8385	26.3894	26.6865	26.3205	27.0296	25.9383	25.8811	26.524	26.7895	26.4598
GANAB	Neutral alpha-glucosidase AB	Q14697;F5H6X6	31.9661	31.9076	31.9483	31.9987	32.0261	31.9422		0.0325389	0.895495		0.118466	0.758803		-0.00610956	0.975619			0.837864		31.9983	31.9848	31.9153	31.9814	31.9294	31.8119	31.8829	32.0151	31.947	31.9882	31.9153	32.0896	32.0017	32.0414	32.0576	32.1115	31.8937	31.8792	32.0117	31.995	31.8829
GAPDH	Glyceraldehyde-3-phosphate dehydrogenase	P04406;E7EUT4;E7EUT5;E7EU54	35.4247	35.4204	35.4401	35.3973	35.4697	35.4382		-0.0274795	0.955225		0.0493387	0.919984		-0.0018851	0.998036			0.999298		35.5032	35.2443	35.5267	35.4672	35.2584	35.5354	35.4733	35.5641	35.2828	35.3666	35.4763	35.3698	35.3763	35.6496	35.3101	35.4733	35.4458	35.402	35.5412	35.2828	35.5267
GAPVD1	GTPase-activating protein and VPS9 domain-containing protein 1	Q14C86-5;Q14C86-2;Q14C86;Q14C86-6;Q14C86-3;Q14C86-4;F8W9S7;C9IZ08	27.926	27.9159	28.0529	27.9291	27.9984	28.0842		0.00310183	0.998123		0.0825826	0.84146		0.0312734	0.930157			0.899976		28.0349	27.7453	27.9977	27.8682	27.9705	27.9089	28.0505	27.9146	28.1937	27.726	28.249	27.9705	27.7708	28.0557	28.1065	28.0296	27.8019	28.0401	28.1115	28.0296	28.1556
GARS	Glycine--tRNA ligase	P41250	30.4162	30.3886	30.3817	30.369	30.4151	30.5178		-0.047143	0.896309		0.026474	0.947784		0.136032	0.71348			0.848958		30.4823	30.2647	30.5014	30.341	30.362	30.4629	30.5203	30.3828	30.2422	30.4532	30.341	30.341	30.341	30.4234	30.5109	30.4727	30.2535	30.5389	30.5296	30.3828	30.6198
GART	Trifunctional purine biosynthetic protein adenosine-3;Phosphoribosylamine--glycine ligase;Phosphoribosylformylglycinamidine cyclo-ligase;Phosphoribosylglycinamide formyltransferase	P22102;P22102-2	28.827	28.6429	28.826	28.8703	28.8418	28.8997		0.0433257	0.959384		0.198893	0.796257		0.0736693	0.82098			0.874388		28.7802	28.6764	29.0243	28.6181	28.5718	28.7389	28.7708	28.7927	28.9146	29.0583	28.9705	28.877	28.5754	29.0453	28.6146	29.0243	28.6831	28.9202	28.9705	28.7292	28.9787
GAS2L1	GAS2-like protein 1	Q99501;E7EQM6;B5MCR7;Q99501-3;Q99501-2	27.3167	26.6794	26.4802	27.1833	26.8653	26.7884		-0.133458	0.852476		0.185921	0.774549		0.30822	0.747131			0.145986		27.2625	27.217	27.4707	26.4661	26.8858	26.6865	26.5522	26.8504	26.038	27.1214	27.2891	27.391	26.9316	26.8019	26.8973	26.9977	26.7645	26.5359	26.8858	26.7129	27.019
GBA2	Non-lysosomal glucosylceramidase	F5H7P6;Q9HCG7-2;Q9HCG7;Q9HCG7-3	24.7418	24.5133	23.8928	25.0387	25.0188	24.587		0.296934	0.89002		0.505474	0.847779		0.694178	0.856002			0.909459		25.0443	23.8884	25.2926	25.0443	25.3745	23.1213	22.8691	25.2643	23.5451	24.6703	25.1253	24.9134	25.4457	25.0062	25.0275	24.9361	25.1055	24.9495	25.3844	25.0443	22.9698
GBAS	Protein NipSnap homolog 2	O75323;C9K068;C9IYJ3;C9J7B1;H7C333	23.7216	23.1834	24.0441	25.1273	24.297	24.4579		1.40563	0.785899		1.11361	0.839938		0.413848	0.791918			0.818638		24.5285	24.4984	22.1381	24.7338	20.8558	23.9607	23.2459	24.4249	24.4614	24.8717	24.918	24.8858	25.8336	22.8267	25.217	24.604	24.5404	24.6096	24.6865	24.5285	24.0071
GBE1	1,4-alpha-glucan-branching enzyme	Q04446;E9PGM4	29.3601	29.6129	29.4221	29.5408	29.5765	29.7022		0.180683	0.808092		-0.0364539	0.928787		0.280109	0.402053			0.374287		29.3174	29.4093	29.3536	29.5014	29.6163	29.7211	29.4707	29.362	29.4334	29.4727	29.7309	29.651	29.3088	29.5518	29.7405	29.5352	29.4785	29.6424	29.7927	29.5609	29.8127
GBF1	Golgi-specific brefeldin A-resistance guanine nucleotide exchange factor 1	Q92538	27.2969	27.362	27.1263	27.1078	27.1089	27.0942		-0.189058	0.812161		-0.253124	0.6403		-0.0321883	0.908626			0.587177		27.2354	27.3662	27.2891	27.5826	27.1795	27.3239	27.2077	27.0401	27.1312	27.2803	27.1507	27.1984	26.8019	27.0813	27.1115	27.1115	27.1312	26.9977	27.1115	27.0505	27.217
GBP4	Guanylate-binding protein 4	Q96PP9	24.3738	24.6208	24.1523	23.4187	23.6367	23.7493		-0.955122	0.794981		-0.984089	0.765296		-0.40297	0.877212			0.800537		23.7594	25.0935	24.2685	24.6486	24.48	24.7338	24.2821	23.8858	24.2891	23.2243	23.771	23.976	22.7034	24.5165	22.8017	24.4738	22.7547	23.0216	24.7796	24.4298	22.7664
GC	Vitamin D-binding protein	D6RF35;P02774;D6RAK8;P02774-2;D6RBJ7	28.6244	28.5033	28.5303	28.3636	28.2683	28.2515		-0.260787	0.823669		-0.235014	0.781392		-0.278832	0.526793			0.592604		28.7927	28.3066	28.7739	28.6146	28.2123	28.6831	28.49	28.4551	28.6458	28.3951	28.3578	28.2077	28.4938	28.0914	28.1984	28.2935	28.49	28.0608	28.17	28.4512	28.3239
GCA	Grancalcin	H7BXD5;P28676;H7C2Z6	27.4651	27.2251	27.2143	27.3301	27.4754	27.4514		-0.135001	0.910176		0.250388	0.828081		0.237072	0.791073			0.920824		27.4394	27.632	27.3239	27.0813	27.3494	27.2445	27.0401	27.3494	27.2535	27.189	27.8623	27.2714	26.9977	27.7581	27.7708	27.2714	27.1015	27.7708	27.6865	27.0505	27.2979
GCC1	GRIP and coiled-coil domain-containing protein 1	Q96CN9	23.5543	22.7208	22.8172	23.0564	23.942	23.1549		-0.497863	0.879596		1.2212	0.615655		0.337713	0.886218			0.76864		23.0117	24.2749	23.3762	22.0707	22.9822	23.1095	23.6664	21.8487	22.9365	22.3076	24.1676	22.3335	23.417	24.1204	23.6763	24.6612	23.3101	23.8902	22.8524	23.2365	22.6405
GCLC	Glutamate--cysteine ligase catalytic subunit	P48506	24.3595	24.3357	24.274	24.8939	25.0272	24.9172		0.534404	0.850765		0.691534	0.828539		0.643189	0.767522			0.908349		23.1792	24.8385	25.0608	24.7796	22.9348	25.2926	24.9672	24.7995	23.0553	24.7796	25.1488	24.7945	24.8528	25.1604	25.0317	24.9539	24.9628	25.065	25.0401	24.9316	24.632
GCLM	Glutamate--cysteine ligase regulatory subunit	P48507	29.1205	29.3142	29.2229	29.2498	29.3617	29.36		0.12932	0.886749		0.0474928	0.968125		0.137108	0.679991			0.915964		29.0531	28.94	29.3683	29.1628	29.2262	29.5536	29.21	29.258	29.2007	29.3515	29.3992	29.3367	28.9117	29.6578	29.0839	29.4629	29.2422	29.1676	29.3724	29.4746	29.4254
GCN1L1	Translational activator GCN1	Q92616	23.8281	23.5208	23.286	23.7388	23.5491	23.6738		-0.0893439	0.926888		0.0282453	0.989766		0.387787	0.595505			0.871522		23.6757	24.019	23.7895	24.2432	22.9283	23.391	23.422	23.2345	23.2015	23.976	23.7695	23.2961	23.9134	23.6096	23.391	23.2291	23.9665	23.6865	23.9672	23.7594	23.2821
GDI1	Rab GDP dissociation inhibitor alpha	P31150;B4DHX4	30.7699	30.9851	31.0121	30.8344	30.8584	30.974		0.0644279	0.890508		-0.126713	0.838		-0.0380767	0.948544			0.790663		30.8608	30.7692	30.6798	30.7613	31.0217	31.1724	31.1422	30.94	30.9539	30.7453	30.9746	30.9046	30.7129	30.7692	30.8534	31.0737	30.7373	30.7453	31.0544	30.9539	31.1422
GDI2	Rab GDP dissociation inhibitor beta	P50395;E7EU23;P50395-2;Q5SX87	32.7045	32.7314	32.8126	32.6747	32.8118	32.8802		-0.0298284	0.962267		0.0803572	0.903668		0.0676912	0.797825			0.884538		32.7907	32.5956	32.7272	32.5822	32.6985	32.9135	32.8138	32.8157	32.8081	32.4967	32.9224	32.7454	32.5343	32.8682	32.6522	33.0958	32.6307	32.7613	33.0084	32.8271	32.9241
GET4	Golgi to ER traffic protein 4 homolog	Q7L5D6;Q7L5D6-2;C9JPA8;C9JHN8	24.8016	24.7927	24.9297	24.8987	25.0634	24.8525		0.0970373	0.919159		0.270624	0.764836		-0.0771564	0.958651			0.978022		24.48	24.9933	24.9316	24.7746	24.7846	24.8191	25.1135	24.9316	24.7441	25.1332	24.9672	24.9539	24.5404	25.3376	25.1871	25.0317	24.6971	24.6703	25.7286	24.7796	24.2317
GFOD1	Glucose-fructose oxidoreductase domain-containing protein 1	Q9NXC2	23.7129	23.7466	23.8301	24.0698	24.042	23.9231		0.356887	0.852861		0.295396	0.86966		0.0929718	0.96489			0.993692		22.8934	23.9847	24.2607	23.9225	24.3712	22.9461	22.5695	24.6892	24.2317	24.1751	24.1871	24.0691	23.8481	24.3307	24.0935	23.4904	24.2535	23.9672	24.2463	24.0772	23.4016
GFPT1	Glutamine--fructose-6-phosphate aminotransferase [isomerizing] 1	Q06210-2;Q06210	23.9104	23.7166	23.3809	24.1253	24.0975	24.0706		0.214883	0.891524		0.380927	0.809401		0.689643	0.58543			0.689539		24.1095	23.4923	24.1294	23.6971	23.3511	24.1015	23.7182	22.6981	23.7265	23.6209	24.1253	24.5983	24.1565	23.8288	23.7435	24.5285	24.2891	24.2678	23.7995	23.976	24.239
GGA1	ADP-ribosylation factor-binding protein GGA1	Q9UJY5-4;Q9UJY5-3;Q9UJY5;Q6IC75;B0QYR6;Q9UJY5-2	24.3341	23.9126	23.464	24.4323	23.5697	24.0931		0.0982436	0.965194		-0.342834	0.895103		0.629021	0.80029			0.850502		24.4488	24.374	24.1795	24.3511	22.7272	24.6595	22.6217	23.1495	24.6209	25.2652	23.7003	23.9409	24.823	24.244	23.7113	23.0777	23.246	24.6918	23.9917	24.3307	23.358
GGA3	ADP-ribosylation factor-binding protein GGA3	Q9NZ52;G3V1K5;Q9NZ52-2;B7Z456	25.0111	25.6847	25.246	25.7361	26.0194	25.8396		0.725045	0.813383		0.3347	0.817049		0.593661	0.66073			0.611305		24.2096	25.1642	25.6595	25.7077	25.4984	25.8481	25.4984	24.5344	25.705	25.3778	26.417	25.5344	25.6153	26.4938	26.0833	25.4583	26.0422	25.558	26.0874	25.8019	25.9111
GGCT	Gamma-glutamylcyclotransferase	O75223;B8ZZN4;E7EU55;B8ZZK2	25.9994	26.2661	25.9329	26.2594	26.1043	26.202		0.26	0.831308		-0.161845	0.870196		0.26905	0.647859			0.836959		26.0995	25.8336	26.065	26.4202	26.3443	26.0338	25.9293	25.772	26.0975	26.5507	26.2996	26.1852	26.002	25.7364	26.4473	25.8858	26.3477	26.4457	26.0793	25.9869	26.2961
GGH	Gamma-glutamyl hydrolase	Q92820;E5RGF0	25.8287	25.9911	25.7332	25.9199	26.4707	26.1593		0.0912517	0.956289		0.479603	0.603717		0.426115	0.378292			0.50606		25.9066	25.8457	25.7338	26.2979	25.7895	25.8858	25.654	25.8433	25.7024	25.9202	25.3712	25.6622	26.726	26.6865	26.4969	26.2856	26.4138	26.2661	26.3342	25.9825	26.0547
GGPS1	Geranylgeranyl pyrophosphate synthase	O95749;C9J6G3;C9J7M1	25.2957	24.9708	24.8455	24.6235	24.8564	24.001		-0.672241	0.849219		-0.114423	0.840631		-0.844438	0.80452			0.845924		24.9043	25.1253	25.8576	24.8433	24.9361	25.1332	24.9134	24.8385	24.7846	25.1015	25.3239	23.2592	24.8093	25.0359	24.7846	24.6918	24.9134	22.1975	25.5522	23.6114	24.6431
GID8	Glucose-induced degradation protein 8 homolog	Q9NWU2	24.3005	24.6211	24.1442	24.8219	24.9101	24.8872		0.521349	0.849679		0.289075	0.841199		0.743021	0.774283			0.890992		24.7077	24.604	23.59	24.632	24.4923	24.7389	24.5754	22.8088	25.0484	25.1174	23.9343	24.9716	25.2643	25.5135	24.7492	24.9803	24.3975	25.3975	24.4488	24.6376	25.065
GIPC1	PDZ domain-containing protein GIPC1	O14908;A8K4I3	24.2284	24.6284	24.0081	24.6108	24.254	23.9827		0.382384	0.919491		-0.374425	0.884607		-0.0253615	0.996035			0.988897		23.8093	25.217	23.659	25.1871	24.4738	24.2244	25.3066	24.6264	22.0912	25.6068	24.417	25.3031	23.1163	24.7645	24.5926	24.8142	22.8447	24.7846	24.3712	22.7732	24.002
GIPC3	PDZ domain-containing protein GIPC3	Q8TF64	26.8955	26.9075	26.7984	27.0949	27.1627	27.11		0.19944	0.879226		0.255234	0.672034		0.311629	0.792717			0.902181		26.9977	26.8623	26.8264	26.8142	26.7771	27.1312	27.3325	26.3629	26.6998	27.2262	27.5536	27.0608	26.5389	27.2714	27.0914	27.217	27.0711	27.3745	26.8019	27.019	27.2445
GIT1	ARF GTPase-activating protein GIT1	Q9Y2X7;Q9Y2X7-3	28.7593	28.8455	28.7506	28.8749	28.8331	28.8288		0.115618	0.813451		-0.0123552	0.989624		0.0781261	0.717474			0.931108		28.7096	28.8294	28.7389	28.7453	28.8623	28.9288	28.7421	28.7421	28.7676	28.9923	28.9567	28.7064	28.8445	28.8858	28.5499	29.0583	28.8385	28.7096	28.9231	28.8712	28.8112
GIT2	ARF GTPase-activating protein GIT2	F8W7V0;Q14161-9;Q14161-8;Q14161-5;Q14161;Q14161-7;Q14161-4;Q14161-3;F5H882;F8WAK2;F8VXI9;Q14161-2;Q14161-11;Q14161-6;Q14161-10;F8W822	23.7818	23.4932	23.1766	23.2485	23.5423	23.5542		-0.533328	0.808752		0.0491149	0.986219		0.377608	0.872144			0.940693		23.9043	23.5554	23.8858	23.4551	23.5016	23.5229	22.4617	23.7179	23.3501	24.0293	23.0643	22.7814	23.1188	22.4601	23.8288	23.6053	24.275	24.0772	23.265	24.2463	22.6282
GK	Glycerol kinase;Putative glycerol kinase 3	P32189-1;A6NJP5;P32189-2;P32189;F8W7S9;Q14409	28.2013	28.1631	28.2153	28.1842	28.1669	28.0913		-0.0171309	0.970095		0.00382964	0.996024		-0.123986	0.769864			0.947779		28.3662	28.1065	28.1312	28.1361	27.9869	28.3662	28.2123	28.1937	28.2399	28.1795	28.3066	28.1795	28.0711	28.1747	28.203	28.1984	28.0914	27.8858	28.0296	28.2847	28.1652
GK2	Glycerol kinase 2	Q14410	24.3836	25.4461	25.6876	24.9869	24.5509	25.5179		0.603275	0.907427		-0.895229	0.811709		-0.169705	0.874149			0.844342		22.4126	25.3376	25.4008	25.1332	25.6096	25.5955	25.7796	25.705	25.5783	25.5374	25.5841	23.5058	25.3205	25.3545	24.1742	25.5667	23.1081	25.2133	26.0975	25.3376	25.4234
GLA	Alpha-galactosidase A	P06280	25.7721	25.7933	25.9789	26.0476	25.9495	25.8177		0.275522	0.809975		0.156137	0.917814		-0.161149	0.818505			0.939349		25.5045	25.6944	26.1174	25.8361	25.7594	25.7846	26.0567	25.7645	26.1154	26.1908	25.8576	26.0833	26.0588	26.524	25.6348	26.3084	25.3307	25.5926	25.6944	25.8409	26.143
GLB1	Beta-galactosidase	P16278-3;P16278;E7EQ29;P16278-2	27.8595	27.8889	28.1037	27.9738	28.0996	28.0464		0.114294	0.911592		0.210782	0.71549		-0.0573459	0.938062			0.891371		27.9146	27.8682	27.7958	27.8019	27.7833	28.0813	28.0401	28.3452	27.9259	27.6931	27.9428	27.8081	28.4512	28.2262	28.0608	27.9705	28.141	28.1361	27.9923	27.8264	28.2308
GLG1	Golgi apparatus protein 1	Q92896;Q92896-3;Q92896-2;H3BM42	25.5342	25.4116	25.6654	25.4805	25.2527	24.9308		-0.053618	0.965364		-0.158844	0.829879		-0.734582	0.50408			0.484414		25.2021	25.8336	25.5667	25.1015	25.5463	25.5869	25.4266	25.4073	26.1623	25.6998	25.002	25.7466	25.4738	25.2571	25.1871	25.3205	25.2463	24.5638	25.1055	24.989	25.065
GLIPR2	Golgi-associated plant pathogenesis-related protein 1	Q5VZR0;Q9H4G4	23.9266	24.0932	24.2127	24.0856	23.434	23.853		0.159009	0.890485		-0.659171	0.804542		-0.359777	0.785468			0.819652		23.7995	24.1038	23.8764	23.6431	24.6431	23.9933	24.391	24.4676	23.7796	24.5711	23.9225	24.0691	23.7796	22.3652	23.9134	23.6865	23.7708	23.9406	24.417	23.4002	23.654
GLO1	Lactoylglutathione lyase	Q04760;Q04760-2	29.1771	28.9637	29.105	29.1045	29.0435	29.0807		-0.0725524	0.938047		0.0798051	0.878794		-0.0242635	0.964625			0.962316		29.4154	29.0889	29.027	28.8324	28.9031	29.1556	29.217	29.0737	29.0243	29.3766	29.249	29.003	28.7895	29.1164	28.8623	29.203	28.9923	29.2123	29.1984	28.7162	29.196
GLOD4	Glyoxalase domain-containing protein 4	E7EMY5;Q9HC38-2;B7Z403;Q9HC38;I3L3Q4	27.991	27.7608	27.8285	28.0301	27.9799	27.9301		0.0391717	0.956749		0.219126	0.773797		0.101587	0.693514			0.789578		28.1214	28.019	27.8324	27.9259	27.524	27.8324	27.9316	27.7645	27.7895	28.0711	28.2935	27.9539	27.8019	28.0711	27.9705	28.1263	27.7518	27.8916	28.0401	27.8799	27.9089
GLRX	Glutaredoxin-1	P35754	27.8184	27.7344	27.4341	27.9478	27.7324	27.762		0.129391	0.877138		-0.00203832	0.997948		0.327876	0.704711			0.701286		27.9202	27.7518	27.7833	27.8081	27.7771	27.6181	27.3578	27.5536	27.391	27.8741	28.2262	28.066	27.6251	28.0762	27.7833	27.5609	27.509	27.4629	28.2399	27.5682	27.7771
GLRX3	Glutaredoxin-3	O76003	28.9761	28.7529	28.7398	28.8821	28.9067	28.8754		-0.0940388	0.900781		0.153732	0.843614		0.135569	0.817751			0.914254		28.8324	28.9622	29.1337	28.5826	28.7195	28.9567	28.7129	28.7421	28.7645	28.9841	29.099	28.877	28.5682	29.109	28.8203	29.0243	28.673	28.8142	29.0164	28.5646	29.1065
GLS	Glutaminase kidney isoform, mitochondrial	O94925-3;O94925	25.5422	25.0525	26.5853	25.6922	25.6721	24.6255		0.149955	0.980478		0.619575	0.944424		-1.95982	0.672127			0.938507		23.7369	26.5135	26.3762	26.4815	22.4703	26.2058	26.0995	27.1795	26.4769	26.6181	26.038	23.2385	26.8741	22.4733	26.6998	26.8973	26.6181	23.8213	23.7922	27.3745	23.5139
GLTP	Glycolipid transfer protein	Q9NZD2;F5H0U5	26.1681	25.9651	25.626	26.386	25.8887	25.8353		0.217843	0.877954		-0.0763664	0.978516		0.209288	0.901727			0.845222		26.3205	26.0547	26.1293	26.0148	26.1391	25.7415	25.792	25.019	26.067	26.2151	26.5045	26.9316	25.8927	25.0567	26.521	25.6811	26.2961	26.1371	26.0169	26.143	25.0443
GLUD1	Glutamate dehydrogenase 1, mitochondrial	F5GYQ4;P00367;F8WA20;B4DGN5;B3KV55	27.2734	27.9496	27.849	27.7658	27.8066	27.8682		0.492402	0.791479		-0.143004	0.771998		0.0191744	0.976045			0.439123		27.5315	27.0084	27.2803	28.1214	27.7958	27.9316	27.6998	28.1214	27.726	27.8682	27.4707	27.4707	28.2535	27.7195	27.8445	27.7708	27.8916	27.7325	27.7453	27.8203	28.1747
GLUL	Glutamine synthetase	P15104;E7ESR6	23.1619	22.5771	22.9721	23.2798	24.0377	23.5085		0.117942	0.820398		1.46062	0.59156		0.536407	0.696729			0.310105		23.0119	23.232	23.2417	21.9017	22.8475	22.9819	22.6768	23.0856	23.154	23.136	23.2678	23.3778	23.3376	23.5475	23.6099	25.0619	23.9316	23.976	23.7559	23.5285	22.7738
GMDS	GDP-mannose 4,6 dehydratase	E9PI88;O60547	25.369	25.433	25.1545	25.2625	25.4783	24.7772		-0.106478	0.878874		0.04529	0.971595		-0.377368	0.949099			0.960835		25.5609	25.1984	25.3477	25.1871	25.632	25.48	25.0401	25.1135	25.3101	25.1214	25.3578	25.1095	25.4614	25.2785	25.452	25.8623	25.3205	22.0931	25.9606	25.4202	25.6348
GMFB	Glia maturation factor beta	E7EWZ9;P60983;G3V4P8	27.0764	27.0821	27.0776	27.1856	26.8656	27.2511		0.109193	0.8537		-0.216529	0.841477		0.173525	0.867999			0.853406		27.019	27.0401	27.17	26.6595	27.2803	27.3066	27.0813	27.3494	26.8019	27.1015	27.4154	27.217	27.0084	26.7645	27.019	27.0608	26.6181	26.8741	27.4551	27.0711	27.604
GMFG	Glia maturation factor gamma	O60234	30.383	30.554	30.4774	30.2283	30.1783	30.2524		-0.154713	0.851502		-0.375664	0.710512		-0.224991	0.588115			0.680004		30.3724	30.2193	30.5573	30.4532	30.933	30.2759	30.4334	30.4234	30.5754	30.0349	30.3515	30.4919	30.0349	29.9539	30.2077	30.2759	30.2759	30.1115	30.341	30.4334	30.1239
GMIP	GEM-interacting protein	E7ERB7;Q9P107	26.0753	25.5157	25.7307	25.7011	25.9546	25.8747		-0.374142	0.817847		0.438828	0.750099		0.143998	0.802856			0.71167		25.9517	26.4598	25.8142	25.5433	25.2244	25.7796	25.4707	26.0296	25.6918	25.3778	25.9202	25.9338	25.5725	26.17	25.6237	26.317	25.7077	25.8457	25.9825	25.7895	25.8811
GMPPA	Mannose-1-phosphate guanyltransferase alpha	Q96IJ6;Q96IJ6-2	27.0305	26.8353	26.9115	27.212	27.2442	27.2769		0.181422	0.895791		0.40895	0.705107		0.365413	0.710557			0.817245		26.9202	26.9089	27.2625	26.9089	26.632	26.965	26.509	27.4234	26.8019	27.3745	27.726	26.9089	26.8385	27.2714	26.976	27.1115	27.6181	27.3745	27.1507	27.2077	27.3745
GMPPB	Mannose-1-phosphate guanyltransferase beta	Q9Y5P6;Q9Y5P6-2	28.65	28.6783	28.6958	28.6226	28.7504	28.7643		-0.0273875	0.956101		0.0720437	0.899285		0.068517	0.854263			0.916354		28.7227	28.6663	28.5609	28.7453	28.4938	28.7958	28.604	28.7064	28.7771	28.5573	28.6629	28.8112	28.4591	28.7421	28.7096	28.9814	28.5682	28.805	28.8945	28.5934	28.7645
GMPR	GMP reductase 1	P36959	30.3573	30.5989	30.4797	30.473	30.5521	30.5317		0.115696	0.878644		-0.0468038	0.920538		0.0519416	0.949734			0.915283		30.5481	30.4629	30.0608	30.7533	30.4234	30.6198	30.8004	30.341	30.2979	30.6372	30.4433	30.4919	30.3196	30.4234	30.5754	30.6798	30.5296	30.6372	30.5109	30.5754	30.4032
GMPR2	GMP reductase;GMP reductase 2	H0YMB3;H0YLV5;Q6PKC0;H0YNJ6;Q9P2T1;Q9P2T1-2;Q86T14	26.6389	26.8951	26.9702	27.0886	27.1077	27.2053		0.449753	0.577848		0.212687	0.756358		0.235105	0.833027			0.591575		26.7518	26.7129	26.452	26.7518	26.8623	27.0711	27.391	26.4282	27.0914	26.9316	27.141	27.1312	27.1507	27.0914	27.1214	27.2979	26.9202	27.0084	27.0608	27.4629	27.2891
GMPS	GMP synthase [glutamine-hydrolyzing]	P49915;B4DUT7;F8W720	26.3224	26.0505	26.254	26.2689	26.0941	26.229		-0.0534948	0.965532		0.043605	0.97397		-0.0250084	0.958781			0.923314		26.632	26.48	25.8552	26.3084	26.0813	25.7619	26.3959	26.1055	26.2607	26.1776	26.228	26.632	26.038	26.2335	25.9225	26.3511	25.8694	26.0894	26.3894	26.0711	26.3662
GNA13	Guanine nucleotide-binding protein subunit alpha-13	Q14344;F8W818;F5H1G8	27.6545	27.7825	27.9828	27.5573	27.2328	27.6505		-0.0971972	0.9563		-0.549699	0.711646		-0.332316	0.5282			0.704744		27.7064	27.632	27.6251	27.8799	27.4862	27.9814	27.9814	28.0243	27.9428	27.2535	26.8741	27.8799	28.2216	27.4073	27.6865	26.726	27.1115	27.5463	27.8264	27.391	27.8385
GNAI2	Guanine nucleotide-binding protein G(i) subunit alpha-2	P04899;F5H4U5;P04899-4;B4E2X5;P04899-3;P04899-2;B3KTZ0;F5GZL8	29.1305	29.4717	29.4609	29.2652	29.0456	29.1941		0.134764	0.923506		-0.426124	0.253316		-0.266803	0.661005			0.753081		29.391	28.9787	29.0217	29.4976	29.362	29.5555	29.341	29.6407	29.4012	29.196	28.7645	29.2147	29.8858	29.1164	28.9787	29.0788	29.0084	28.9031	29.3023	29.17	29.4012
GNAQ	Guanine nucleotide-binding protein G(q) subunit alpha	P50148;B1AM21	29.0906	29.1329	29.5192	29.0446	28.9302	29.0575		-0.0460676	0.985		-0.202707	0.837819		-0.461681	0.564933			0.914831		28.9841	29.2714	29.0164	29.158	29.2647	28.976	29.341	29.9677	29.249	28.7613	28.1652	29.2979	29.9539	29.4134	28.8294	28.6216	28.8564	29.2331	29.0137	28.9174	29.066
GNAS	Guanine nucleotide-binding protein G(s) subunit alpha isoforms short;Guanine nucleotide-binding protein G(s) subunit alpha isoforms XLas	P63092-3;P63092-2;P63092;A6NI00;Q5JWF2-2;Q5JWF2	25.0136	25.2128	25.2527	25.0112	24.7468	24.6148		-0.00242122	0.997583		-0.466	0.648085		-0.637943	0.744708			0.87652		25.3745	24.8717	24.7945	25.2643	24.9316	25.4425	24.9716	25.48	25.3066	25.0148	24.7077	24.4862	25.8361	25.0317	24.7895	24.4425	24.7234	23.4256	25.0608	24.9495	25.0233
GNAZ	Guanine nucleotide-binding protein G(z) subunit alpha	P19086	28.0607	28.2492	28.4038	28.0815	27.8113	28.0492		0.0207791	0.989935		-0.437937	0.64017		-0.354599	0.761422			0.835311		27.9595	28.1312	28.0914	28.3704	28.1604	28.217	28.141	28.8534	28.217	27.9372	27.5165	28.1015	28.7708	28.2354	27.6389	27.632	27.7389	28.0557	28.1263	27.5754	28.4394
GNB1	Guanine nucleotide-binding protein G(I)/G(S)/G(T) subunit beta-1	P62873;B1AKQ9;B1AKQ8	31.1704	31.4261	31.6168	31.4509	31.5112	31.6466		0.280433	0.698292		0.0851874	0.871018		0.0297893	0.87595			0.0865303		31.2422	31.2019	31.0673	31.4919	31.3088	31.4775	31.6022	31.6329	31.6154	31.3088	31.4184	31.5844	31.4919	31.5934	31.4532	31.7006	31.2979	31.5799	31.6066	31.6586	31.7413
GNB2	Guanine nucleotide-binding protein G(I)/G(S)/G(T) subunit beta-2	P62879;E7EP32;C9JXA5;C9JIS1;C9JZN1;B3KPU1	28.8945	29.1668	29.1009	29.1074	28.9278	29.1549		0.212946	0.809592		-0.238972	0.811079		0.053956	0.939074			0.8371		29.027	28.6998	28.9567	29.393	29.0084	29.099	29.158	28.9869	29.158	29.2957	28.8829	29.0788	29.1724	29.2147	29.027	28.8799	28.5898	29.0164	29.2147	28.9512	29.4374
GNB2L1	Guanine nucleotide-binding protein subunit beta-2-like 1;Guanine nucleotide-binding protein subunit beta-2-like 1, N-terminally processed	D6RAC2;D6REE5;P63244;H0YAM7;H0Y8W2;H0Y8R5;D6RBD0;D6RFX4;H0YAF8;D6RHH4;D6R9Z1;D6R9L0	24.9429	24.2739	24.4021	24.9968	24.5785	24.8939		0.0539457	0.960677		0.304591	0.672527		0.491801	0.636836			0.23577		24.9089	24.7594	25.1604	24.2317	24.3511	24.239	24.3511	24.5522	24.3031	24.6153	25.1488	25.217	25.0062	24.8858	24.4041	24.5754	24.4488	24.7441	25.452	24.48	24.8997
GNB4	Guanine nucleotide-binding protein subunit beta-4	Q9HAV0	27.1789	27.4954	27.2549	27.2265	27.6568	27.4405		0.0475761	0.98149		0.161381	0.896015		0.185656	0.784479			0.916708		27.4785	27.3066	26.7518	27.524	27.2625	27.6998	27.189	27.2262	27.3494	27.0401	27.673	26.3545	27.8385	28.066	27.0914	27.9089	27.5609	27.1115	27.4154	27.7645	27.4707
GNB5	Guanine nucleotide-binding protein subunit beta-5	O14775-3;O14775-2;O14775;H0YNW7;Q96F32	26.7476	26.9335	26.8748	26.8096	27.1324	26.8111		0.0620325	0.922625		0.198967	0.82891		-0.0636762	0.947788			0.78233		26.8858	26.7389	26.6181	27.1115	26.8385	26.8504	26.8973	26.6458	27.0813	26.5898	27.0401	26.9089	26.6998	27.0505	26.965	27.5165	26.9977	26.4089	27.0084	26.965	26.8623
GNG11	Guanine nucleotide-binding protein G(I)/G(S)/G(O) subunit gamma-11	P61952	25.3462	26.5225	26.5877	26.5932	26.6005	26.4397		1.247	0.822024		0.0780773	0.95706		-0.147996	0.77065			0.650767		26.2077	23.5845	26.2463	26.2553	26.5225	26.7895	26.5478	26.6458	26.5696	26.3578	26.3359	27.0608	26.6181	26.8142	26.3153	27.0084	26.2643	26.2207	26.6865	26.5075	26.3443
GNG5	Guanine nucleotide-binding protein G(I)/G(S)/G(O) subunit gamma-5	P63218	27.0092	27.352	27.4227	27.1013	27.2421	27.556		0.0921569	0.957432		-0.109919	0.91767		0.133263	0.906625			0.845404		27.1507	27.1507	26.726	27.1604	27.3494	27.5463	27.5609	27.3494	27.3578	26.9869	26.6998	26.8504	27.8682	27.2625	27.4862	26.726	27.4938	27.3153	27.0505	27.8445	28.0137
GNL1	Guanine nucleotide-binding protein-like 1	P36915;A2AB27;B4DWZ0	25.7864	25.4686	25.5892	25.5675	25.7168	25.6555		-0.218963	0.844191		0.248143	0.824275		0.0662276	0.945303			0.921859		26.0935	25.5955	25.6703	25.4738	25.4583	25.4738	25.5195	25.8215	25.4266	25.8457	25.3101	25.433	25.6811	26.2244	25.4676	25.5404	25.6348	25.4488	25.867	25.341	25.965
GNPAT	Dihydroxyacetone phosphate acyltransferase	O15228;Q5TBH8;B4DNM9	23.9046	23.7267	24.4991	23.6423	24.0705	23.5259		-0.262264	0.929863		0.343848	0.848623		-0.973157	0.567334			0.856286		23.1863	24.7182	23.8093	23.4607	23.9069	23.8125	24.6649	24.7389	24.0935	23.094	23.3862	23.2554	24.8336	23.5713	23.4136	24.6707	24.6264	23.2026	22.7432	24.002	24.156
GNPDA1	Glucosamine-6-phosphate isomerase 2;Glucosamine-6-phosphate isomerase;Glucosamine-6-phosphate isomerase 1	Q8TDQ7-3;Q8TDQ7-2;Q8TDQ7;D6R917;D6RB13;D6RAY7;D6R9P4;P46926	24.2099	24.2185	23.295	24.7389	24.9516	24.908		0.529063	0.89299		0.73314	0.836546		1.61299	0.746297			0.897214		24.5522	25.2133	22.8642	24.9539	22.8157	24.8858	25.5404	22.7399	21.6046	23.895	24.2656	25.141	25.654	25.239	23.6989	25.767	25.1015	25.0062	23.1092	25.6376	25.8788
GNPNAT1	Glucosamine 6-phosphate N-acetyltransferase	Q96EK6;G3V5E4;G3V4W4	22.8227	23.5479	24.307	24.4328	24.3187	24.207		1.61007	0.763157		0.770831	0.834046		-0.0999424	0.968076			0.826311		21.529	23.5164	23.4227	22.026	23.5527	25.065	24.8385	23.2248	24.8576	24.6918	25.0691	24.8044	23.1659	24.8623	24.9584	23.9147	23.5396	24.6486	24.4974	24.8623	22.8198
GNS	N-acetylglucosamine-6-sulfatase	B4DTT0;H7C3P4;F6S8M0;B4DYH8;P15586;F5H4C6;F5H260	24.1608	24.5966	24.6957	24.6033	24.8069	25.0382		0.442564	0.861937		0.210299	0.816577		0.342456	0.716361			0.769452		24.7441	22.989	24.7492	24.8576	24.317	24.6153	24.5754	24.8093	24.7024	24.6107	24.4488	24.5105	24.8433	24.5833	24.8858	24.7695	24.989	24.5869	24.9933	25.0232	25.5492
GOLGA2	Golgin subfamily A member 2	Q08379;Q08379-2	26.3295	26.2696	26.095	26.1779	26.2422	26.1339		-0.151612	0.852677		-0.0274388	0.98753		0.0389139	0.952661			0.953455		26.4629	26.3728	26.1527	26.1352	26.3828	26.2909	26.1604	26.2021	25.9225	26.3629	25.8764	26.3273	26.1449	26.3494	25.772	26.0955	26.7518	26.0874	25.9716	26.0629	26.4138
GOLGA3	Golgin subfamily A member 3	Q08378;Q08378-2;Q08378-4	24.6987	24.5521	24.6393	24.7589	24.6467	24.9008		0.060232	0.931476		0.094608	0.915068		0.261526	0.646571			0.836773		24.6703	24.7286	24.6971	24.945	24.5165	24.1946	24.6153	24.6486	24.654	24.918	24.7492	24.945	24.4234	24.6757	24.5983	24.8142	24.4984	24.8811	25.1135	24.5812	25.0275
GOLGA4	Golgin subfamily A member 4	H0Y6I0;Q13439-3;Q13439-4;Q13439;F8W8Q7;C9JHJ5	23.2688	24.344	23.3465	23.1015	23.2313	24.4321		0	0		-1.1127	0.826334		1.08556	0.716569			0.815271		22.5026	23.1173	24.1866	25.1719	24.8904	22.9696	24.2837	23.3717	22.3842	23.666	22.7951	23.6062	22.3389	22.6824	25.0567	22.4127	22.7732	25.3066	23.7455	25.3101	23.3662
GOLGB1	Golgin subfamily B member 1	E7EP74;Q14789;E7EU81	28.2048	28.0814	27.7661	27.2024	27.8048	28.0291		-1.0024	0.85827		-0.276578	0.858647		0.262921	0.803194			0.921674		27.9869	28.0813	28.5463	27.7958	27.7064	28.7421	27.3992	28.2262	27.673	27.8264	24.4758	28.391	28.1164	28.3023	27.8264	27.5969	27.4938	28.0243	28.0914	27.6595	28.341
GOLPH3	Golgi phosphoprotein 3	Q9H4A6;F5H7W9	26.571	26.5592	26.4208	26.6241	26.5669	26.6301		0.0530936	0.96579		0.00772889	0.997648		0.209321	0.64158			0.985643		26.9428	26.2979	26.4723	26.5404	26.3477	26.7895	26.6181	26.3239	26.3205	26.533	26.8019	26.9316	26.2299	26.632	26.3975	27.0084	26.2299	26.5522	26.6458	26.533	26.7895
GOLPH3L	Golgi phosphoprotein 3-like	Q9H4A5;Q5T5I6;E9PFK1;F5H4M3	24.8605	24.1337	25.2379	24.4153	24.8036	23.9281		-0.445144	0.91457		0.669827	0.844305		-1.30975	0.570154			0.859789		24.9495	25.0975	24.5344	24.7543	22.7612	24.8858	25.239	25.3811	25.0935	22.338	25.3645	25.0317	24.9271	24.3239	24.9043	25.3376	24.6486	24.6649	22.5779	24.6431	23.8265
GOPC	Golgi-associated PDZ and coiled-coil motif-containing protein	F5H1Y4;Q9HD26-2;Q9HD26	24.9542	24.7963	24.5465	24.1502	24.0976	24.7614		-0.803962	0.819861		-0.698673	0.836418		0.214883	0.797676			0.902544		25.0732	24.9271	24.8623	24.8576	24.8717	24.6595	24.4425	24.3975	24.7995	24.4551	25.0062	24.5045	22.635	24.8858	24.4862	22.259	24.7594	24.7543	24.5404	25.1871	24.5638
GORASP2	Golgi reassembly-stacking protein 2	B4DEI4;Q9H8Y8;B4DKT0;Q9H8Y8-2	26.0016	26.1265	26.1779	26.2476	26.0289	26.3123		0.245988	0.815043		-0.0975831	0.936937		0.13439	0.879631			0.91549		26.2188	25.6568	26.1293	25.9716	26.2785	26.1293	26.038	26.0127	26.4831	26.1527	26.2838	26.0894	26.4645	26.3562	25.7286	26.3795	25.6513	26.4041	26.3778	25.9225	26.5448
GOT1	Aspartate aminotransferase, cytoplasmic;Aspartate aminotransferase	P17174;B7Z7E9;B7Z1I2	28.1573	27.8868	27.915	28.1813	27.8658	27.9616		0.0239135	0.976202		-0.0210228	0.972621		0.0466428	0.946742			0.58923		28.2308	28.249	27.9923	27.8264	27.8858	27.9484	27.7389	28.003	28.003	27.9031	28.1459	28.2891	28.3869	28.0296	27.9316	27.7064	27.7958	27.8203	27.976	27.7833	28.267
GP1BA	Platelet glycoprotein Ib alpha chain;Glycocalicin	P07359;E7ES66	32.4127	32.3369	32.4851	32.0986	31.6658	31.8158		-0.314165	0.852205		-0.671063	0.427825		-0.669273	0.378842			0.288308		32.4209	32.3568	32.4605	32.1483	32.3515	32.5109	32.2077	32.8042	32.4433	31.9643	31.4384	32.2563	32.7353	31.8645	31.8004	31.2979	31.7006	31.8347	31.9505	31.5664	31.9117
GP1BB	Platelet glycoprotein Ib beta chain	F5H0F6;P13224;P13224-2	30.3031	30.1472	30.6669	30.0554	29.7396	30.1241		-0.24779	0.914371		-0.40758	0.775043		-0.542795	0.330829			0.680487		30.4032	30.2193	30.2869	30.1842	29.9814	30.2759	30.5014	30.8534	30.6458	29.6198	29.2736	30.3196	31.0084	29.5128	30.0864	29.2354	30.1239	30.0608	29.94	30.2647	30.2308
GP5	Platelet glycoprotein V	P40197	32.2453	31.9847	32.0707	31.7076	31.1157	30.9887		-0.537667	0.785594		-0.868999	0.290855		-1.08205	0.252123		+	0.00521606		32.2019	32.3646	32.1694	31.7771	32.0348	32.1422	31.8608	32.4184	31.933	31.6415	31.2647	31.8004	32.1239	31.3515	30.9746	30.9117	31.225	30.8534	31.196	30.7692	31.1361
GP6	Platelet glycoprotein VI	Q9HCN6-2;Q9HCN6;Q9HCN6-3	29.325	29.2417	29.4193	29.1668	28.8961	28.9939		-0.158178	0.817261		-0.345542	0.737785		-0.425432	0.515646			0.408685		29.341	29.4688	29.1652	29.1337	29.3001	29.2913	29.1913	29.6798	29.3869	29.1937	29.1676	28.965	29.341	29.2054	28.8234	28.4976	29.0583	28.906	29.0004	28.8385	29.2308
GP9	Platelet glycoprotein IX	P14770	30.9439	31.0402	31.0576	30.7176	30.563	30.6642		-0.226304	0.886577		-0.477251	0.754731		-0.393405	0.544386			0.799559		31.2703	30.8081	30.7533	31.099	31.0608	30.9609	30.7771	31.1422	31.2535	30.6629	30.2077	30.7129	31.2869	30.9882	30.7292	29.8887	30.6458	30.7692	30.5934	30.4334	30.8608
GPCPD1	Glycerophosphocholine phosphodiesterase GPCPD1	Q9NPB8;H0Y565;E9PDI1	24.3393	23.9952	23.7202	23.5467	24.0468	23.8628		-0.792642	0.8167		0.051631	0.987533		0.142679	0.949244			0.922814		23.8093	23.8576	25.3511	23.9316	24.0772	23.9768	23.6971	23.8764	23.5869	24.2096	23.7895	22.5668	23.6209	22.857	24.002	24.824	24.5045	24.5344	23.6649	24.2961	22.9558
GPD1L	Glycerol-3-phosphate dehydrogenase 1-like protein;Glycerol-3-phosphate dehydrogenase [NAD(+)]	Q8N335;C9JM46;C9JFA7	26.7952	26.6267	26.7194	26.4846	26.7082	26.6267		-0.310627	0.834317		0.0814236	0.869559		-0.0926499	0.834424			0.902106		26.4598	26.8858	27.0401	26.5898	26.6865	26.604	26.558	26.8741	26.726	26.019	26.604	26.4769	26.8385	26.6181	26.506	26.7771	26.9316	26.8142	26.5522	26.5507	26.5898
GPD2	Glycerol-3-phosphate dehydrogenase, mitochondrial	P43304;P43304-2;F8W6E4	29.0612	29.1554	29.1587	28.8408	28.6818	28.7037		-0.220431	0.910836		-0.473612	0.846869		-0.455013	0.595284			0.921877		29.1604	28.8203	29.203	29.5772	29.0505	28.8385	29.027	29.3303	29.1189	28.8081	28.3578	28.4746	29.7227	29.6163	29.0686	27.5754	28.4668	29.109	28.7864	28.2979	28.6216
GPI	Glucose-6-phosphate isomerase	P06744;P06744-2	32.211	32.2316	32.2594	32.3021	32.3082	32.3256		0.0910234	0.795882		0.0766204	0.871583		0.0661421	0.887948			0.934762		32.1634	32.2106	32.2591	32.1694	32.3383	32.1872	32.2759	32.2019	32.3006	32.2535	32.3724	32.3515	32.2308	32.2279	32.2731	32.5389	32.1931	32.1604	32.5273	32.1813	32.4334
GPS1	COP9 signalosome complex subunit 1	Q13098-5;Q13098;Q13098-7;C9JFE4;Q13098-6	28.4373	28.2506	28.1476	28.3447	28.3935	28.4028		-0.0926865	0.765411		0.142963	0.830548		0.255206	0.461336			0.483038		28.391	28.4234	28.4976	28.2216	28.0711	28.4591	28.0813	28.0813	28.2803	28.2847	28.3951	28.3494	28.3494	28.5128	28.4976	28.2399	28.3239	28.4512	28.49	28.267	28.4032
GPSM3	G-protein-signaling modulator 3	E9PIP3;Q9Y4H4	26.9685	26.8412	27.3814	27.2107	26.8808	26.8084		0.242261	0.785533		0.0395406	0.955647		-0.573009	0.533062			0.323967		26.9977	26.965	26.9428	26.9202	26.7771	26.8264	26.9539	27.524	27.6663	27.0914	27.4473	27.3066	26.9977	26.726	26.976	27.1214	26.6998	27.0084	26.6595	26.5898	26.976
GPX1	Glutathione peroxidase 1	P07203	31.7431	31.9036	31.9826	31.816	31.8399	31.9448		0.0728203	0.923367		-0.063793	0.952862		-0.0377634	0.959181			0.936353		32.0832	31.4581	31.6881	31.8081	31.6022	32.3006	32.0512	31.7006	32.196	31.7493	31.8571	31.8608	31.7965	31.8157	32.0217	31.8719	31.6501	31.6714	32.1331	31.94	32.0348
GPX4	Phospholipid hydroperoxide glutathione peroxidase, mitochondrial	P36969-2;P36969	28.826	29.0546	29.0696	29.0694	29.0967	29.1113		0.243362	0.816857		0.0420804	0.943911		0.0416377	0.947988			0.849061		29.1435	28.8294	28.5052	29.0479	28.9484	29.1676	29.203	28.8264	29.1795	28.9923	29.2891	29.0788	28.9174	29.2123	29.0608	29.2308	28.8829	29.0375	29.1483	29.0217	29.2376
GPX7	Glutathione peroxidase 7	Q96SL4	25.7128	26.0167	25.9888	25.5098	25.5508	25.5206		-0.203013	0.880221		-0.465921	0.714659		-0.468161	0.712304			0.775806		26.2499	25.3811	25.5075	26.4473	25.9271	25.6757	26.6595	25.7518	25.5551	25.2996	25.6486	25.4073	25.6838	25.2821	25.4862	25.6403	25.7945	25.4425	25.7846	25.2317	25.6237
GRAP2	GRB2-related adapter protein 2	O75791;F5H1V3;B7Z8F8;B7Z8E3;F5H548	29.5365	29.5515	29.5734	29.5165	29.6089	29.6054		-0.0200076	0.980685		0.0574053	0.9471		0.0320368	0.958141			0.999962		29.5898	29.4354	29.5844	29.3452	29.4707	29.8385	29.5628	29.6578	29.4995	29.6093	29.7486	29.5052	29.203	29.5808	29.4862	29.8445	29.524	29.4394	29.6093	29.4842	29.8887
GRB10	Growth factor receptor-bound protein 10	Q13322-3;Q13322-2;Q13322-4;Q13322	24.5979	24.6562	24.2087	24.5722	24.5919	24.3482		-0.0257309	0.976396		-0.0643299	0.932885		0.13951	0.954098			0.92143		24.4425	24.8528	24.4984	24.7182	24.4362	24.8142	24.2891	24.2678	24.0691	24.4425	24.8288	24.5812	24.4362	24.7129	24.5869	24.3031	24.7645	23.0879	24.6486	24.8717	24.7846
GRB2	Growth factor receptor-bound protein 2	P62993;P62993-2	31.0435	31.1056	31.0649	30.9785	31.0492	31.0389		-0.0649991	0.853168		-0.0564121	0.9198		-0.0259242	0.948777			0.949851		31.1544	31.0084	30.9677	31.2365	30.9259	31.1544	31.225	30.995	30.9746	30.9259	31.0084	31.0608	30.9188	31.2647	31.0673	30.9746	30.8901	30.9882	31.0017	31.0544	31.1115
GRHPR	Glyoxylate reductase/hydroxypyruvate reductase	Q9UBQ7;Q5T946	28.6241	28.6533	28.6616	28.8491	28.9389	29.0035		0.225017	0.849999		0.285583	0.705739		0.34197	0.288385			0.554748		28.5352	28.4629	28.8741	28.5826	28.5754	28.8019	28.6697	28.6865	28.6285	28.7064	28.9231	29.217	28.5499	29.1115	28.9316	29.0531	28.6595	28.8534	29.114	29.0762	28.9705
GRIPAP1	GRIP1-associated protein 1	Q4V328;B1B0M1;F5H504;Q4V328-4;Q4V328-2;Q4V328-3	29.2355	29.4408	29.3637	29.26	29.3382	29.2992		0.0244509	0.961206		-0.102639	0.848429		-0.0644617	0.796526			0.843642		29.3174	29.2216	29.1676	29.3641	29.4532	29.5052	29.3869	29.3153	29.389	29.3153	29.2692	29.4154	29.0401	29.4532	29.2007	29.5555	29.1435	29.2308	29.4214	29.2123	29.3325
GRK5	G protein-coupled receptor kinase 5	G8JLE8;P34947	24.846	25.3153	25.039	25.0724	24.7289	25.5019		0.226395	0.892107		-0.586398	0.872699		0.462918	0.51824			0.919922		25.0772	24.8288	24.632	24.7846	25.1253	26.0359	24.8717	24.9043	25.341	25.0148	24.4215	25.2021	25.6513	25.705	22.7287	25.5014	24.9803	25.4266	25.7156	25.2643	25.6012
GRK6	G protein-coupled receptor kinase 6	P43250-2;F8W9W2;P43250-3;P43250;D6RHX8	27.1345	27.3764	27.0796	27.2251	27.1921	27.3886		0.0906471	0.894563		-0.184258	0.83982		0.309064	0.515043			0.740646		27.1312	27.1214	27.1507	27.0813	27.3153	27.7325	27.17	27.0711	26.9977	27.0401	27.4073	27.4234	27.0296	27.1507	27.1214	27.1984	27.2979	27.1984	27.5898	27.2803	27.4862
GSAP	Gamma-secretase-activating protein;Gamma-secretase-activating protein 16 kDa C-terminal form	A4D1B5;A4D1B5-3;A4D1B5-2	24.9457	24.8884	24.4761	25.281	25.2599	25.399		0.335292	0.813259		0.371479	0.756835		0.922873	0.704264			0.756603		25.3135	24.7846	24.7389	24.7441	24.632	25.2891	24.9043	23.1933	25.3307	25.002	25.3477	25.2133	25.5609	25.5667	25.0148	25.3645	25.0935	25.8288	25.3545	24.945	25.4676
GSDMD	Gasdermin-D	G3V1A6;P57764;E9PIB2	27.6243	26.8136	27.0898	27.2956	27.5058	27.3315		-0.328787	0.761869		0.692203	0.644347		0.241704	0.793126			0.410336		27.5682	27.6251	27.6798	26.8973	26.4122	27.1312	27.1984	27.1507	26.9202	27.2714	27.4551	27.0084	27.4473	27.6389	27.7195	27.6998	26.965	27.17	27.8445	27.0401	27.2714
GSK3A	Glycogen synthase kinase-3 alpha	P49840;A8MT37;F5H7D7	26.4829	26.2274	26.4504	26.4437	26.4144	26.3707		-0.039166	0.964548		0.186968	0.843526		-0.0796537	0.94946			0.969382		26.4692	26.4041	26.5754	26.3578	26.1449	26.1795	26.1681	26.143	27.0401	26.2571	26.8019	26.5344	26.1814	26.5374	26.5711	26.604	25.945	26.4984	26.4831	26.2661	26.2354
GSK3B	Glycogen synthase kinase-3 beta	P49841;P49841-2	27.7732	27.7641	27.8773	27.6484	27.6236	27.7311		-0.124754	0.84386		-0.14048	0.8412		-0.146224	0.839553			0.900258		27.9484	27.7958	27.5754	27.6998	27.611	27.9814	27.9202	27.6458	28.066	27.509	27.6458	27.7129	27.726	27.7581	27.5682	27.7771	27.391	27.5463	28.019	27.5389	27.8203
GSN	Gelsolin	P06396-2;F5H8M4;F8WA45	34.358	34.2738	34.2712	34.4517	34.5592	34.5911		0.0937096	0.91791		0.285446	0.699418		0.319915	0.350199			0.635055		34.581	34.1827	34.3101	34.3892	34.0753	34.3568	34.4272	34.1529	34.2336	34.581	34.6996	34.4272	34.099	34.5754	34.4396	34.7946	34.4272	34.5584	34.6787	34.5978	34.5296
GSPT1	Eukaryotic peptide chain release factor GTP-binding subunit ERF3A	P15170-2;P15170;H3BR35	30.2035	30.2356	30.3561	30.1767	30.2515	30.2054		-0.0268731	0.955223		0.0158989	0.988705		-0.150688	0.742686			0.922722		30.2422	30.1842	30.1842	30.1604	30.0737	30.4727	30.3828	30.2422	30.4433	30.1115	30.362	30.1724	30.0608	30.099	30.1842	30.4919	30.2308	30.0349	30.3828	30.0737	30.3303
GSR	Glutathione reductase, mitochondrial	P00390-2;P00390-3;P00390;P00390-5;P00390-4	29.5352	29.486	29.5581	29.456	29.5203	29.7635		-0.079154	0.91293		0.0343016	0.980653		0.205383	0.594738			0.824542		29.4551	29.651	29.4995	29.4194	29.4294	29.6093	29.6163	29.6527	29.4053	29.4957	29.1189	29.588	29.6216	29.7629	29.2602	29.2625	29.7958	29.5916	29.843	29.7645	29.8549
GSS	Glutathione synthetase	P48637;B6F210;B7Z514	25.7424	26.0162	25.9729	26.0737	25.8917	25.6057		0.331238	0.732534		-0.124492	0.792675		-0.3672	0.650263			0.374122		25.8647	25.6237	25.7389	25.9495	25.9955	26.1035	25.902	26.0041	26.0127	26.2979	25.8881	26.0854	26.0233	25.8433	26.0833	25.792	25.8481	25.8576	25.2426	25.4138	25.9089
GSTK1	Glutathione S-transferase kappa 1	Q9Y2Q3;Q9Y2Q3-3;Q9Y2Q3-2;E9PFN5;Q9Y2Q3-4	28.7566	28.8843	28.8741	28.8222	29.0044	28.7155		0.0655877	0.942809		0.12001	0.835893		-0.158582	0.624702			0.816217		28.8504	28.7064	28.7129	28.8945	28.6697	29.0889	28.8682	28.8682	28.8858	28.6527	28.9428	28.5352	29.158	29.1507	28.9202	29.099	28.8474	28.6355	28.6764	28.6355	28.9146
GSTM1	Glutathione S-transferase Mu 1	P09488;E7EWW9;P09488-2;B9ZVX7;H3BRM6	27.7785	27.819	27.4484	29.0894	28.9167	29.0232		1.3109	0.794303		1.09766	0.764593		1.57483	0.623433			0.621635		27.6527	26.604	29.0788	27.6998	26.5105	29.2467	27.4707	25.8528	29.0217	29.0296	28.5352	29.5146	29.2781	28.7421	28.6527	29.2007	29.0711	28.7389	28.8173	29.1747	29.362
GSTM2	Glutathione S-transferase Mu 2	P28161;E9PHN6;F6XZQ7;E9PEM9;E9PHN7;E9PLF1	27.3567	27.306	27.4269	27.991	27.8192	27.8178		0.63424	0.757677		0.513215	0.777675		0.390893	0.789355			0.73144		27.0914	26.965	28.0137	27.3828	26.632	27.9031	27.217	26.9977	28.066	28.019	28.0137	27.8858	28.0453	27.8973	27.4629	28.066	27.8504	27.4862	27.8564	27.6527	28.2759
GSTM3	Glutathione S-transferase Mu 3	P21266	28.6018	28.416	28.4898	28.9761	28.7986	28.7995		0.374247	0.700726		0.382581	0.665575		0.309713	0.714672			0.429131		28.8564	28.4823	28.4668	28.5499	28.5718	28.1263	28.6181	28.7802	28.0711	29.1239	28.9841	28.8564	28.94	28.6629	28.9089	28.9977	28.6251	28.611	29.0084	28.6527	28.9259
GSTM4	Glutathione S-transferase Mu 4	Q03013-2;Q03013;Q4JNT8;A6NNT0	23.775	23.2401	23.734	25.005	24.5325	24.4101		1.22998	0.809276		1.29233	0.711207		0.676091	0.882263			0.834632		23.0831	23.3749	24.867	23.7671	22.5056	23.4477	22.8602	23.1509	25.1908	23.594	25.0484	26.0813	25.2961	24.4838	23.2163	25.2926	25.1371	23.5024	22.9066	25.4769	25.7543
GSTM5	Glutathione S-transferase Mu 5	P46439;Q5T8R1;Q5T8Q9	23.2594	23.5805	23.2436	23.966	23.9733	23.583		0.70656	0.810676		0.392835	0.834188		0.339376	0.886948			0.888755		23.6776	22.2055	23.895	22.5863	24.1109	24.0443	22.6978	22.6955	24.3376	24.1795	24.1253	23.7895	23.7695	24.2116	23.7389	23.9933	23.9495	24.0691	23.9643	23.015	23.2835
GSTO1	Glutathione S-transferase omega-1	P78417;D3DRA3;Q5TA02;F5H7H0;Q5TA01	32.9035	32.8567	32.7483	32.8857	32.9461	32.9354		-0.0177835	0.974984		0.0893822	0.829162		0.187126	0.528045			0.808643		32.8366	32.9027	32.9712	32.9347	32.7129	32.9224	32.8737	32.6198	32.7514	32.8403	33.0299	33.0034	32.6692	32.9916	32.8214	32.9983	32.9729	32.8774	32.9522	32.8937	33.0184
GSTP1	Glutathione S-transferase P	P09211;A8MX94	32.8404	33.0338	33.051	32.9673	33.0246	33.1654		0.126888	0.770842		-0.00917117	0.990929		0.114392	0.866151			0.696503		32.8062	32.8195	32.8956	33.0299	32.9171	33.1544	33.1559	32.8233	33.1739	32.8366	33.0266	32.9712	33.0348	32.9831	32.9153	33.2478	32.9522	32.9797	33.2619	33.0117	33.4083
GSTT1	Glutathione S-transferase theta-1	P30711;E9PH92;C9JA47;G3XAK0	23.6174	24.2351	23.7828	23.8543	24.2234	24.057		0.236888	0.958004		-0.0117814	0.997616		0.274229	0.90534			0.974486		21.8581	24.6431	24.3511	23.5165	24.7338	24.4551	23.6209	24.7077	23.0197	23.2605	23.3072	24.4984	24.3511	24.3578	23.7196	24.6595	24.1565	24.4425	24.0935	24.5404	23.1516
GSTT2	Glutathione S-transferase theta-2B;Glutathione S-transferase theta-2	Q6ICJ4;P0CG30;B5MCL2;P0CG29	24.7093	24.6731	24.6239	25.2322	25.2512	25.1903		0.522889	0.898461		0.578063	0.870871		0.566392	0.889848			0.99		25.8552	22.7414	25.5315	25.5014	22.9924	25.5255	25.4676	22.6421	25.7619	25.2607	25.5983	24.8904	25.1795	25.7518	25.5609	24.3578	25.3342	25.4266	25.5955	23.9847	25.7543
GSTZ1	Maleylacetoacetate isomerase	G3V267;G3V5T0;G3V4T6;O43708-2;A6NED0;O43708;G3V3B9	23.8174	23.5122	24.1769	24.4402	24.3877	24.6229		0.622793	0.848679		0.875538	0.757945		0.446019	0.724625			0.749146		22.6384	24.7286	24.0854	24.08	23.9933	22.4631	24.2244	24.6096	23.6967	24.6757	24.3443	24.1946	24.5463	24.5225	24.895	23.8093	24.3239	24.5344	24.5463	24.239	25.1719
GTDC1	Glycosyltransferase-like domain-containing protein 1	Q4AE62-2;Q4AE62;B8ZZ45;Q4AE62-3;G5EA49;H7BYJ5	24.6347	24.561	24.7541	24.2323	23.8873	24.3906		-0.402305	0.861849		-0.673688	0.846586		-0.363471	0.597209			0.915823		24.6595	24.48	24.7645	24.5404	24.4614	24.6811	24.8142	24.6096	24.8385	24.5926	24.7182	23.1202	24.4984	21.9443	24.5983	24.7182	24.2883	23.9847	24.4862	24.5105	24.5812
GTPBP1	GTP-binding protein 1	O00178	26.7201	26.4107	26.4806	26.2726	26.1579	26.2175		-0.447443	0.770498		-0.252808	0.773859		-0.263019	0.540235			0.368765		27.0296	26.7645	26.3662	26.6595	26.3101	26.2625	26.632	26.5135	26.2961	26.3975	26.1871	26.189	26.317	26.2926	26.141	26.3427	25.8552	26.2553	26.1546	26.3728	26.0874
GTPBP2	GTP-binding protein 2	Q9BX10;Q9BX10-4;Q9BX10-2;H0Y7A5	29.5698	29.4466	29.5276	29.4703	29.5472	29.5151		-0.0995636	0.823997		0.100685	0.830419		-0.0125052	0.966101			0.913137		29.6865	29.5407	29.4823	29.3848	29.3473	29.6075	29.4804	29.5109	29.5916	29.4134	29.4012	29.5184	29.5481	29.4532	29.5259	29.6747	29.5352	29.3452	29.4765	29.5826	29.6561
GUCY1A3	Guanylate cyclase soluble subunit alpha-3	Q02108;D6RDW3	29.709	29.4573	29.3991	29.6288	29.616	29.5877		-0.0801886	0.855881		0.158644	0.672907		0.188582	0.50407			0.257899		29.7047	29.7309	29.6915	29.4394	29.3662	29.5664	29.4629	29.3494	29.3848	29.4532	29.7453	29.5682	29.7486	29.5071	29.6407	29.6998	29.6163	29.5184	29.6527	29.4881	29.6915
GUCY1B3	Guanylate cyclase soluble subunit beta-1	Q02153;E9PCN2;B7Z426;Q02153-2;B7Z685;D6RC99	29.0736	29.0311	28.8803	29.1332	29.1691	29.1388		0.059567	0.915602		0.138	0.841743		0.258511	0.711223			0.860156		29.0914	29.003	29.1263	28.8504	28.9428	29.3001	28.9622	28.5426	29.1361	28.9428	29.3869	29.0965	29.1065	29.3282	29.0375	29.2602	29.0505	29.0137	29.1747	29.0217	29.3452
GUK1	Guanylate kinase	Q16774;B1ANH5;B1ANH0;Q16774-2;F5GXL9;B1ANG9;B1ANH6;B1ANH2;B1ANH1;B1ANH3	26.6077	26.5753	26.6364	26.5663	26.6314	26.7333		-0.0414182	0.960585		0.056136	0.943052		0.0968601	0.774571			0.935094		26.8741	26.4073	26.5419	26.604	26.4089	26.7129	26.6865	26.4969	26.726	26.5135	26.7771	26.518	26.4567	26.8504	26.5374	26.7518	26.3861	26.6181	26.7518	26.7129	26.8504
GXYLT1	Glucoside xylosyltransferase 1	Q4G148-2;Q4G148	24.2129	24.2587	24.1564	24.1614	24.2186	23.9757		-0.051541	0.956701		-0.040067	0.94656		-0.180768	0.871179			0.921433		24.0275	24.3578	24.2535	24.3578	24.1719	24.2463	23.7995	24.5926	24.0772	23.8385	24.3376	24.002	24.4676	24.3101	24.1095	24.4105	24.0443	23.8385	24.019	23.7077	24.3376
GYG1	Glycogenin-1	P46976;P46976-2;C9JQ42;P46976-3;G5E9W8;D3DNH0	28.2809	27.5921	28.1612	28.2278	28.3656	28.2588		-0.0530988	0.954867		0.773488	0.486866		0.097623	0.869482			0.234421		28.3452	27.9923	28.5052	27.3745	27.5754	27.8264	28.1747	28.0965	28.2123	28.3704	28.1263	28.0608	28.3536	28.0864	28.362	28.8203	28.1937	28.0864	28.0608	28.5052	28.3828
GYS1	Glycogen [starch] synthase, muscle	P13807-2;P13807;B7Z806	28.0438	27.8155	27.9488	27.9766	28.0272	28.0294		-0.0672439	0.918708		0.211686	0.795603		0.0806149	0.906178			0.921311		28.0401	27.965	28.1263	27.8142	27.7581	27.8741	27.9428	27.8741	28.0296	27.8264	28.0864	28.2354	27.7581	28.2979	27.7389	28.1459	27.9259	27.8916	27.9705	27.8203	28.4354
HABP2	Hyaluronan-binding protein 2;Hyaluronan-binding protein 2 50 kDa heavy chain;Hyaluronan-binding protein 2 50 kDa heavy chain alternate form;Hyaluronan-binding protein 2 27 kDa light chain;Hyaluronan-binding protein 2 27 kDa light chain alternate form	F5H5M6;Q14520;B7Z8Q5	23.5505	24.1009	24.6998	23.3761	23.8807	24.1801		-0.174416	0.96539		-0.22022	0.903705		-0.519751	0.802502			0.836594		22.2339	24.1642	24.2535	23.4558	24.6153	24.2317	24.1488	25.275	24.6757	24.4105	23.197	22.0394	23.8576	23.3443	24.2258	24.4041	23.5486	24.9933	23.4172	23.7286	24.5812
HADH	Hydroxyacyl-coenzyme A dehydrogenase, mitochondrial	E9PF18;Q16836;Q16836-2	28.4923	28.3286	28.7096	28.9066	28.9985	28.7713		0.414302	0.667469		0.669863	0.260132		0.0617282	0.953574			0.210538		28.3662	28.5754	28.5352	28.3704	28.2535	28.362	28.4433	29.0057	28.6798	29.0401	28.7389	28.8203	29.027	29.1337	29.0531	29.0427	28.7645	29.114	28.9202	28.4938	28.5573
HADHA	Trifunctional enzyme subunit alpha, mitochondrial;Long-chain enoyl-CoA hydratase;Long chain 3-hydroxyacyl-CoA dehydrogenase	P40939	28.2466	28.5909	28.7504	28.6559	28.6972	28.5244		0.409284	0.784154		0.106336	0.903794		-0.225957	0.431109			0.654626		28.3109	28.3325	28.0965	28.6527	28.509	28.611	28.8203	28.7989	28.632	28.49	28.7421	28.3153	29.0762	29.1819	28.6075	28.6251	28.3745	28.4512	28.5052	28.5128	28.6285
HADHB	Trifunctional enzyme subunit beta, mitochondrial;3-ketoacyl-CoA thiolase	B4E2W0;P55084;F5GZQ3;B5MD38	28.2924	28.3014	28.6494	28.5562	28.6845	28.6031		0.26379	0.819236		0.383148	0.70623		-0.0463068	0.947155			0.655144		28.2847	28.1652	28.4274	28.6075	28.1556	28.141	28.6629	28.9316	28.3536	28.2445	28.5646	28.49	28.9259	28.9089	28.8264	28.5014	28.5014	28.7064	28.5128	28.5646	28.6285
HAGH	Hydroxyacylglutathione hydrolase, mitochondrial	H3BPK3;Q16775-2;Q16775;H3BPQ4	27.2438	27.1335	27.3183	27.408	27.2063	27.2805		0.164177	0.812786		0.072823	0.877344		-0.0378795	0.954831			0.836413		27.141	27.3828	27.2077	27.2077	27.0813	27.1115	27.3066	27.4785	27.17	27.5536	27.2891	27.509	27.2803	27.0505	27.3066	27.4073	27.0608	27.2979	27.0296	27.2262	27.5682
HARS	Histidine--tRNA ligase, cytoplasmic	D6REN6;P12081;B4DDD8;B4DY73;B3KWE1;B4E1C5;C9JWK3;E7ETE2	29.1606	29.1207	29.258	29.2748	29.2165	29.2288		0.114268	0.836001		0.0957761	0.852516		-0.0292296	0.956699			0.9247		29.1312	29.249	29.1015	29.019	29.0453	29.2979	29.141	29.4113	29.2216	29.2077	29.3992	29.391	29.1015	29.2625	29.027	29.3971	29.1795	29.0889	29.389	29.109	29.3282
HBA1	Hemoglobin subunit alpha	P69905	32.6322	32.4841	32.1093	33.7033	33.4588	33.2876		1.07109	0.653738		0.97468	0.749823		1.17825	0.532851			0.326683		32.5273	32.5844	32.7849	32.7292	32.4895	32.2336	32.4678	32.1269	31.7333	33.2619	33.9153	34.1901	33.4458	34.6944	33.0381	33.5754	32.5273	33.1694	34.3236	32.6777	32.9797
HBB	Hemoglobin subunit beta;LVV-hemorphin-7;Spinorphin	P68871	33.4291	33.359	32.8634	34.4183	34.4362	33.9936		0.989229	0.635884		1.07726	0.752512		1.13017	0.578859			0.408116		33.4334	33.0495	33.8042	33.5527	33.4943	33.0299	33.2336	32.9712	32.3854	33.933	34.4702	34.933	34.337	35.7677	33.8792	34.6522	33.4458	33.5641	35.1377	33.4209	33.8516
HBD	Hemoglobin subunit delta	P02042;E9PFT6;E9PEW8	26.423	26.6441	26.057	27.8826	27.6623	27.4918		1.45961	0.582025		1.01814	0.778537		1.43482	0.503949			0.255814		26.3762	26.3762	26.5165	26.9316	26.6181	26.3828	26.3427	26.1661	25.6622	27.604	28.2847	28.2262	27.4154	28.9705	27.1312	28.0813	26.4661	27.2077	28.5682	26.7129	27.4785
HBS1L	HBS1-like protein	Q9Y450-4;Q9Y450;B7Z1K2;B7Z524;H0YDX7;H0YES5	25.3619	25.235	25.3043	25.1402	24.7543	25.2028		-0.221687	0.859407		-0.480739	0.869312		-0.101501	0.912784			0.920848		24.945	25.5225	25.6181	24.8858	25.4614	25.3578	25.3645	25.3205	25.228	25.0608	25.5165	25.1449	24.8385	25.002	23.2014	25.4425	25.3712	25.0854	25.558	24.7286	25.4394
HCLS1	Hematopoietic lineage cell-specific protein	P14317;E7EVW7	30.3678	30.585	30.6882	30.4071	30.4891	30.5845		0.0392774	0.955708		-0.0958856	0.895554		-0.103663	0.874438			0.837899		30.2869	30.4234	30.393	30.6458	30.3088	30.8004	30.8004	30.4032	30.8608	30.1724	30.4234	30.7129	30.3196	30.6022	30.393	30.6964	30.2647	30.5109	30.7211	30.7129	30.393
HDAC6	Histone deacetylase 6	Q9UBN7;E7ERH6	27.9007	28.0705	28.0328	28.0833	28.098	28.2426		0.182579	0.819901		0.0274692	0.94535		0.209855	0.662158			0.651793		27.8682	28.1015	27.7325	28.0965	27.9595	28.1556	28.0243	28.1312	27.9428	27.9372	28.3023	28.1015	27.9923	28.1214	28.217	28.0505	28.003	28.1115	28.4113	28.3869	28.0608
HDDC2	HD domain-containing protein 2	Q7Z4H3-3;Q7Z4H3-2;Q7Z4H3	23.4968	23.2003	23.8488	23.0489	23.1725	23.618		-0.447874	0.854255		-0.0278114	0.98901		-0.230848	0.801836			0.69326		23.6564	23.7182	23.1157	23.0134	23.1577	23.4298	24.2879	23.5404	23.7182	23.5404	22.0777	23.6431	22.9344	22.9596	22.7773	23.6431	23.3101	23.5638	23.8576	23.6994	23.3511
HDGF	Hepatoma-derived growth factor	P51858;A8K8G0;Q5SZ08;Q5SZ07;B7Z525	25.1627	23.4149	23.68	23.2156	24.3554	24.9154		-1.9471	0.760362		0.940491	0.823337		1.23536	0.578539			0.58725		24.8093	25.4362	25.2426	22.7193	23.3089	24.2166	23.3483	22.7737	24.918	22.6194	22.7509	22.1684	25.3239	23.443	23.347	25.065	25.5667	24.8717	24.6671	25.2463	24.8764
HDHD1	Pseudouridine-5-phosphatase	E9PAV8;E7EVH9;F5H6B0;Q08623-3;Q08623	24.2416	24.7258	24.4015	24.2128	24.1182	24.7577		-0.02881	0.994399		-0.607599	0.840057		0.356193	0.868215			0.939991		24.239	25.0691	23.4169	24.3511	24.7492	25.0772	23.3008	25.2607	24.6431	23.5638	23.6043	24.7338	24.9495	23.171	25.2317	23.166	24.9043	24.7796	24.918	24.5638	24.7695
HDHD2	Haloacid dehalogenase-like hydrolase domain-containing protein 2	Q9H0R4;Q9H0R4-2	28.3795	28.3587	28.313	28.3958	28.4308	28.4413		0.0163453	0.987272		0.0721337	0.871121		0.12831	0.895929			0.999428		28.4823	28.0557	28.6004	28.4113	28.1747	28.49	28.5499	28.5934	27.7958	28.4746	28.5898	28.3066	28.2123	28.3662	28.2979	28.5352	28.524	28.5463	28.3992	28.2123	28.6075
HDHD3	Haloacid dehalogenase-like hydrolase domain-containing protein 3	Q9BSH5	23.6662	22.5827	22.516	23.7443	23.8984	23.3298		0.0781441	0.985122		1.31574	0.796888		0.813788	0.747296			0.871045		25.4569	22.765	22.7766	22.4491	22.2582	23.0408	22.051	23.2405	22.2565	22.4013	23.5567	24.4041	24.6153	24.4862	24.7543	24.7645	21.5888	24.2096	22.0137	23.5093	23.5867
HDLBP	Vigilin	Q00341;E7EM71;H0Y394	26.2049	25.8221	25.9606	26.3338	26.2921	26.1972		0.128972	0.858049		0.469967	0.0250228		0.236564	0.742854			0.246263		26.0711	26.3545	26.189	25.8504	25.792	25.824	25.8118	25.8623	26.2077	26.228	26.5898	26.143	26.3745	26.3239	26.3239	26.2926	26.228	26.3844	26.0547	26.4202	25.9293
HEATR5A	HEAT repeat-containing protein 5A	F5H619;Q86XA9;Q86XA9-2;E9PB09;B5MC49;H7C5W6	26.1438	26.1355	26.1958	26.1241	26.2499	26.0416		-0.0196789	0.944008		0.114415	0.881976		-0.154179	0.874946			0.96106		26.0995	26.1075	26.2244	25.9473	26.5344	25.9248	26.1273	26.6458	25.8142	26.1253	26.0691	26.2207	26.0813	26.2785	26.1738	26.1449	26.4024	25.8361	26.2607	26.0443	26.0254
HEATR5B	HEAT repeat-containing protein 5B	Q9P2D3-3;Q9P2D3	25.6548	25.3963	25.4547	25.5642	25.8458	25.81		-0.0905957	0.916719		0.449509	0.752307		0.355341	0.595563			0.729692		25.6209	25.8361	25.5075	25.6181	25.1604	25.4105	25.2961	25.4583	25.6096	25.3645	25.7234	25.3066	25.8623	25.4953	25.5315	26.2732	26.0833	25.4362	25.8858	25.9933	25.9248
HEBP1	Heme-binding protein 1	Q9NRV9;F5GWX2	25.9986	26.0353	25.8994	26.0951	26.2211	26.3432		0.0964735	0.957785		0.185865	0.869391		0.443782	0.787335			0.941597		26.2317	25.797	25.9672	26.2408	25.7796	26.0854	26.0588	25.4984	26.141	26.7129	25.7619	26.4567	25.4488	26.1293	26.7771	25.8647	26.1135	27.141	26.0317	26.433	25.767
HEBP2	Heme-binding protein 2	Q9Y5Z4;Q9Y5Z4-2	25.1216	25.8137	25.6792	25.0525	25.2436	24.407		-0.0690893	0.992252		-0.570072	0.756327		-1.27227	0.597115			0.897587		25.9316	25.6264	23.8067	25.5926	25.965	25.8834	25.6971	25.6811	25.6595	25.7945	25.8834	26.0567	22.4753	25.7415	24.9123	25.6998	24.6209	25.1681	22.947	25.0484	24.4643
HECTD3	E3 ubiquitin-protein ligase HECTD3	Q5T447;Q5T447-2	29.013	28.8868	28.9019	29.0369	29.1041	29.1472		0.0238725	0.930352		0.21726	0.759474		0.245278	0.507707			0.575147		29.0762	28.9841	28.9787	28.8081	28.7162	29.1361	28.8203	29.0084	28.877	29.0965	29.1239	28.9622	28.965	29.0737	29.0839	29.2692	28.9896	29.1189	29.2376	28.9923	29.2399
HECTD4	Probable E3 ubiquitin-protein ligase HECTD4	F8VWT9;Q9Y4D8-4;Q9Y4D8;Q9Y4D8-2	25.3389	25.4047	25.2169	25.4359	25.4769	25.4097		0.0970159	0.923355		0.0721664	0.842657		0.192814	0.767929			0.916307		24.9043	25.4394	25.673	25.3975	25.3679	25.4488	25.1253	25.1642	25.3612	25.6012	25.2607	25.4266	25.4551	25.4738	25.3239	25.5725	25.5374	25.4362	25.0813	25.4457	25.6757
HERC4	Probable E3 ubiquitin-protein ligase HERC4	Q5GLZ8-6;Q5GLZ8-3;Q5GLZ8-2;Q5GLZ8	27.0668	27.1902	27.1893	27.407	27.3538	27.3811		0.340203	0.827611		0.163551	0.828078		0.191855	0.819073			0.848873		27.1984	26.7129	27.2891	27.2625	27.019	27.2891	27.1115	27.3153	27.141	27.2445	27.6527	27.5609	27.17	27.5463	27.3066	27.4707	27.0914	27.3153	27.8504	27.0608	27.2979
HEXA	Beta-hexosaminidase;Beta-hexosaminidase subunit alpha	H3BS10;H3BP20;P06865;E9PGL4;H3BU85;H3BTD4	25.3029	25.5321	25.2982	25.249	25.3054	25.4039		-0.0538532	0.977748		-0.226707	0.839722		0.105667	0.917579			0.990726		25.6784	24.6376	25.5926	25.1795	26.0894	25.3273	24.7796	25.6568	25.4583	25.4298	24.7492	25.6376	25.1795	25.5374	25.228	25.2317	25.2244	25.3645	25.5522	25.2096	25.4892
HEXB	Beta-hexosaminidase subunit beta;Beta-hexosaminidase subunit beta chain B;Beta-hexosaminidase subunit beta chain A	P07686;Q5URX0;H0Y9B6;H0YA83	25.3747	25.542	25.4301	24.8319	25.43	24.8824		-0.542883	0.914038		-0.112002	0.796196		-0.547629	0.825642			0.944759		25.4362	25.3135	25.3745	25.4831	25.4645	25.6784	25.5135	25.1253	25.6513	25.6568	25.5075	22.2985	25.8647	25.4041	25.4984	25.5075	25.3101	25.341	23.4259	25.0526	25.7103
HGD	Homogentisate 1,2-dioxygenase	Q93099	26.0777	26.409	26.2438	26.1925	25.981	26.2675		0.114734	0.912945		-0.427979	0.646995		0.0237088	0.979922			0.853933		26.3477	25.9562	25.9293	26.5315	26.0914	26.604	26.217	26.0894	26.425	26.1015	26.4089	26.4282	25.8312	26.0275	25.8215	26.2317	25.8433	25.7389	26.604	26.512	26.2151
HGS	Hepatocyte growth factor-regulated tyrosine kinase substrate	O14964;E7EU53;O14964-2;I3L1E3	27.3678	27.2944	27.3806	27.4685	27.3807	27.4177		0.100718	0.892235		0.0863328	0.86935		0.0371339	0.951322			0.958522		27.2803	27.5969	27.2262	27.17	27.2979	27.4154	27.2714	27.4073	27.4629	27.5389	27.6663	27.2535	27.4154	27.17	27.5826	27.4551	27.3153	27.5014	27.5969	27.141	27.4314
HIBCH	3-hydroxyisobutyryl-CoA hydrolase, mitochondrial	Q6NVY1;Q6NVY1-2;B8ZZZ0	25.72	25.6299	26.0637	26.0016	25.837	25.949		0.28159	0.890552		0.207108	0.855544		-0.114694	0.899667			0.92157		25.6595	25.4583	26.0422	25.8504	25.705	25.3342	25.9517	26.4953	25.7441	26.1095	25.6181	25.4645	26.8142	26.3273	25.7077	25.4202	25.8927	26.0691	25.7441	25.8361	26.1469
HIF1AN	Hypoxia-inducible factor 1-alpha inhibitor	Q9NWT6	24.1226	23.7728	23.5018	23.7314	24.5248	23.9272		-0.391176	0.896643		0.751941	0.775758		0.425355	0.88711			0.916205		24.6875	23.8515	23.8288	22.6467	24.4923	24.1795	22.5666	23.7594	24.1795	24.8044	23.48	24.0526	22.5887	24.8528	24.317	24.3712	24.558	24.9584	23.1667	24.4984	23.0853
HINT1	Histidine triad nucleotide-binding protein 1	P49773;D6REP8;D6RE99;D6RD60	29.5063	29.4137	29.6005	29.5398	29.5372	29.6645		0.033497	0.937963		0.123519	0.868962		0.0640602	0.884733			0.890497		29.6198	29.4919	29.4073	29.4707	29.2957	29.4746	29.708	29.4649	29.6285	29.6389	29.5628	29.579	29.3787	29.326	29.5333	29.94	29.3494	29.5664	29.6372	29.579	29.8756
HINT2	Histidine triad nucleotide-binding protein 2, mitochondrial	Q9BX68	27.2004	27.6686	27.9729	28.1266	28.1016	27.8294		0.926165	0.739662		0.432953	0.834577		-0.143563	0.906771			0.670991		27.0914	27.1604	27.3494	27.4314	27.9705	27.604	28.0243	28.1556	27.7389	28.6964	27.4707	27.8264	28.5128	28.5315	28.5969	27.9977	27.2803	27.7581	28.3367	27.1984	28.0243
HINT3	Histidine triad nucleotide-binding protein 3	Q9NQE9	25.5442	25.9055	25.7292	24.5669	25.7903	25.3129		-0.977226	0.827718		-0.115159	0.842697		-0.416287	0.820265			0.665276		25.7895	25.2996	25.5433	25.7619	26.0711	25.8834	25.5195	25.7871	25.8811	25.4676	23.5566	23.3789	25.8647	25.8504	25.8142	25.9271	25.5696	25.8336	25.5165	25.7077	24.1939
HIST1H2BJ	Histone H2B;Histone H2B type 1-L;Histone H2B type 1-M;Histone H2B type 1-N;Histone H2B type 1-H;Histone H2B type 2-F;Histone H2B type 1-C/E/F/G/I;Histone H2B type 1-D;Histone H2B type F-S;Histone H2B type 1-K;Histone H2B type 3-B;Histone H2B type 2-E;Histone H2B type 1-B;Histone H2B type 1-O;Histone H2B type 1-J	B4DR52;Q99880;Q99879;Q99877;Q93079;Q5QNW6;P62807;P58876;P57053;O60814;Q5QNW6-2;Q8N257;Q16778;P33778;P23527;P06899	25.7561	25.7635	26.2591	25.565	23.6502	24.4205		-0.191088	0.97702		-2.11328	0.7484		-1.83862	0.712355			0.791605		25.2354	25.9781	26.0547	25.5638	25.5955	26.1312	25.8191	26.8973	26.0608	24.989	27.2077	27.2077	22.8554	26.3273	23.8812	22.0406	22.3519	22.125	23.408	26.1642	25.9847
HIST1H4A	Histone H4	P62805	23.5736	22.8801	22.8746	23.9621	23.741	23.6737		0.388549	0.851203		0	0		0.799017	0.603627			0.73123		23.3005	23.3511	24.0691	23.0628	22.2704	23.3072	22.9601	22.3083	23.3555	24.3101	24.1642	24.1795	23.1946	24.009	22.2116	23.9912	24.7521	23.054	23.6757	24.239	23.726
HIST2H2AA3	Histone H2A type 2-C;Histone H2A type 2-A	Q16777;Q6FI13	26.1919	26.3806	26.3909	28.3924	27.7894	27.8364		2.20049	0.651533		1.40876	0.67054		1.44548	0.653294			0.325509		26.4362	26.1681	25.9716	26.3612	26.5898	26.1908	25.9225	27.5165	25.7338	29.4591	28.995	28.1507	26.965	28.9622	27.3325	28.217	26.6458	27.9977	29.1771	26.8385	27.3325
HIST2H2AB	Histone H2A type 1-J;Histone H2A type 1-H;Histone H2A.J;Histone H2A type 1-C;Histone H2A type 3;Histone H2A type 1-D;Histone H2A type 1;Histone H2A type 1-B/E;Histone H2A;Histone H2AX;Histone H2A type 2-B	Q99878;Q96KK5;Q9BTM1;Q93077;Q7L7L0;P20671;P0C0S8;P04908;H0YFX9;C9JE22;P16104;Q9BTM1-2;Q8IUE6	26.1713	24.4815	24.418	28.3798	28.3674	27.6208		2.20849	0.673345		3.88586	0.489091		3.20278	0.504821			0.103384		26.346	26.1214	26.0464	24.9803	23.2961	25.1681	23.3645	25.2856	24.604	29.2847	29.3704	27.3325	27.5315	30.5389	28.1361	28.1214	26.673	28.3951	28.9202	25.1174	28.0505
HK1	Hexokinase;Hexokinase-1	B4DG62;P19367;E7ENR4;P19367-4;P19367-2;P19367-3	32.3954	32.3929	32.4109	32.3267	32.4221	32.5005		-0.068725	0.814602		0.0291726	0.967643		0.0895383	0.712108			0.83854		32.3169	32.4284	32.4408	32.3724	32.3169	32.4895	32.3672	32.3905	32.4751	32.3956	32.3436	32.3196	32.2478	32.6713	32.2979	32.3033	32.4159	32.4083	32.6133	32.4507	32.5296
HLA-A	HLA class I histocompatibility antigen, A-2 alpha chain	F8VU18;H3BM16;A9R9N7;P01892;H3BM09;A9R9N8	28.6533	28.8135	28.9189	28.3318	28.1804	28.324		-0.321486	0.87046		-0.633135	0.34534		-0.594863	0.649701			0.632666		28.3153	29.1507	28.4938	28.5278	29.027	28.8858	28.4394	29.5371	28.7802	28.3704	27.673	28.341	28.9428	28.1937	28.0453	28.189	28.2935	27.9539	28.509	28.2979	28.5352
HLA-B	HLA class I histocompatibility antigen, B-35 alpha chain;HLA class I histocompatibility antigen, B-53 alpha chain	P30685;P30491	27.5325	27.4566	27.5764	28.1058	27.6226	27.4817		0.573283	0.847074		0.165995	0.963585		-0.094687	0.958547			0.936907		28.391	26.8741	27.3325	28.7771	26.5014	27.0914	28.4433	26.8385	27.4473	27.9372	27.3828	28.877	28.2262	27.4629	27.8142	27.3992	27.8142	27.5969	27.3745	27.8142	27.141
HLA-C	HLA class I histocompatibility antigen, Cw-7 alpha chain	O19617;A2ABE5;A2ABE6;A2ABE7;F8VZB9;A2AEA2;A2AEA4;F5GXA6;P10321	22.0726	24.4868	24.6011	23.6126	24.12	24.1446		1.54004	0.820875		-0.366821	0.961295		-0.456542	0.924561			0.815449		20.7726	24.0265	21.4186	22.1351	25.6125	25.7129	25.8694	23.9933	23.9406	23.2678	24.3101	24.1565	22.716	23.7488	25.9338	23.8576	22.9398	25.8623	25.0854	22.734	22.8965
HLA-E	HLA class I histocompatibility antigen, alpha chain E	Q6DU44;F8VPA9;P13747	23.1193	24.1789	24.3129	23.0868	22.8327	23.4197		-0.0325143	0.992218		-1.34625	0.756135		-0.893278	0.713627			0.735661		23.0233	22.9306	23.4041	23.6971	24.9539	23.8858	23.391	24.3645	25.1833	23.1401	23.3749	21.8048	24.0275	21.7019	21.8603	24.1256	23.6431	23.4884	23.1513	24.4041	22.6349
HMGCL	Hydroxymethylglutaryl-CoA lyase, mitochondrial	B1AK13;P35914;F5GYT9;P35914-2	27.3076	27.1425	27.3077	27.5511	27.4854	27.4639		0.243559	0.817283		0.342919	0.570571		0.156209	0.745198			0.593134		27.1795	27.2803	27.4629	27.2625	26.976	27.189	27.2535	27.5682	27.1015	27.4629	27.6181	27.2262	27.8973	27.6389	27.5463	27.341	27.4154	27.5165	27.5165	27.4154	27.4073
HMHA1	Minor histocompatibility protein HA-1;Minor histocompatibility antigen HA-1	Q92619;H7C3G5;F6QP70;F5H4N1;F5H1R4;F5H4A3	31.0712	30.9557	31.0232	31.0398	31.1048	31.0871		-0.0314687	0.955925		0.149052	0.7373		0.06389	0.851427			0.913853		31.015	31.2869	30.9117	30.8004	30.9677	31.099	30.9677	31.1901	30.9117	31.0927	31.1724	30.947	30.947	31.1664	31.099	31.0864	31.0673	31.0927	31.0544	31.0349	31.1664
HN1L	Hematological and neurological expressed 1-like protein	Q9H910;B4DLH4;H3BU16;A6NGP5;Q9H910-2;H3BMV3;H3BMT0;H3BTV5;B4DL85	26.1408	26.5492	26.5916	26.58	26.3941	26.4264		0.439156	0.771182		-0.155085	0.881618		-0.165158	0.841834			0.835219		26.4969	25.8834	26.0422	26.4815	26.1154	27.0505	26.7129	26.2354	26.8264	26.4024	26.673	26.48	26.7645	26.2961	26.5754	26.4567	26.2481	26.1719	26.3745	26.4862	26.673
HNRNPA1	Heterogeneous nuclear ribonucleoprotein A1;Heterogeneous nuclear ribonucleoprotein A1, N-terminally processed	F8VXY0;F8VRQ1;F8W6I7;P09651-3;P09651-2;P09651;H0YH80;F8VZ49;F8VSB5;F8W1S7	23.0401	22.1966	22.9368	23.1054	23.2166	23.1686		0.0653454	0.978316		1.02006	0.817049		0.231761	0.956043			0.938537		23.3753	22.6583	23.0865	22.4053	21.3137	22.8707	23.0166	21.5446	24.2492	23.4178	22.1445	23.0955	23.7638	24.6713	22.2705	23.7642	22.1605	22.3567	24.471	22.205	23.6415
HNRNPA2B1	Heterogeneous nuclear ribonucleoproteins A2/B1	P22626-2;P22626	24.482	24.6039	24.3194	24.9723	24.8845	24.6692		0.490343	0.781749		0.280607	0.878366		0.349802	0.768174			0.836926		24.4984	24.3101	24.6376	24.6918	23.9672	25.1527	24.002	23.9672	24.989	24.7594	25.3031	25.1565	24.6703	25.5983	24.4298	25.0484	24.4614	24.7286	24.7746	24.5696	24.604
HNRNPA3	Heterogeneous nuclear ribonucleoprotein A3	E7EWI9;E7ERJ4;P51991-2;P51991	24.4229	23.3965	24.4015	24.0956	23.4575	23.2764		-0.327385	0.849291		0.0609269	0.990792		-1.12509	0.759829			0.808663		24.5869	24.3376	24.3443	23.9406	23.0345	23.2145	24.3645	24.6757	24.1642	24.5696	23.3391	24.317	24.1565	22.5896	24.141	22.9046	24.1946	24.3443	22.1874	24.7746	21.7993
HNRNPD	Heterogeneous nuclear ribonucleoprotein D0	D6RAF8;Q14103-3;Q14103;H0Y8G5;D6RD83;D6RF44;H0YA96;H7BXN2;B4DTC3;Q14103-4;Q14103-2;D6RBQ9	26.0929	25.8043	25.9782	25.6004	25.9551	25.6317		-0.492427	0.815407		0.150768	0.924395		-0.346503	0.798464			0.917523		26.441	26.2767	25.5609	25.772	25.5195	26.1214	26.3612	25.3545	26.2188	25.1565	25.6944	25.4614	26.0894	25.3376	25.8142	26.6181	26.0505	26.1273	25.275	25.5869	25.5374
HNRNPF	Heterogeneous nuclear ribonucleoprotein F;Heterogeneous nuclear ribonucleoprotein F, N-terminally processed	P52597;B4DKS8	25.585	25.0651	25.6649	25.2263	25.3307	24.5403		-0.358669	0.852555		0.265567	0.946732		-1.12456	0.750991			0.91637		25.2426	26.1312	25.3811	25.4707	25.6998	24.025	25.5638	25.6264	25.8044	25.5285	24.4962	25.3975	25.4831	23.874	25.9089	25.673	25.867	25.867	23.3071	25.772	23.2152
HNRNPH1	Heterogeneous nuclear ribonucleoprotein H;Heterogeneous nuclear ribonucleoprotein H, N-terminally processed	E9PCY7;G8JLB6;P31943;E7EQJ0;D6RAM1;D6R9T0;D6RFM3;D6RIT2;D6RIU0;D6RDU3;D6RJ04;D6RIH9;D6RBM0	26.3878	26.4214	26.5633	26.4994	26.5772	26.6858		0.111578	0.897298		0.15576	0.83662		0.122525	0.900179			0.91529		26.3894	26.4831	26.2909	26.3325	26.2188	26.7129	26.2058	26.5638	26.9202	26.7518	26.6181	26.5463	26.0813	26.5522	26.3307	26.6998	26.726	26.4041	26.8741	26.976	26.4892
HNRNPH3	Heterogeneous nuclear ribonucleoprotein H3	P31942-2;P31942;P31942-3;B4DHY1	25.0238	24.8911	25.0126	25.0769	25.3348	25.4361		0.0530669	0.956674		0.44374	0.711783		0.423496	0.650998			0.628453		24.9225	25.1214	25.0275	25.002	24.5225	25.1488	24.5344	25.2571	25.2463	25.3239	25.2996	25.019	24.6649	25.1604	25.0894	25.5344	25.5551	25.4583	25.5075	25.5841	25.1946
HNRNPK	Heterogeneous nuclear ribonucleoprotein K	Q5T6W5;P61978-3;Q5T6W2	29.1864	29.3414	29.4149	29.3122	29.4774	29.375		0.12573	0.894749		0.135962	0.843693		-0.0398556	0.949123			0.892054		29.2535	29.1795	29.1263	29.2331	29.3557	29.4354	29.4976	29.21	29.5371	29.3303	29.673	29.3109	28.9344	29.3745	29.4881	29.7533	29.2935	29.1771	29.5826	29.391	29.3494
HNRNPL	Heterogeneous nuclear ribonucleoprotein L	P14866;A6NIT8;B4DPK8	23.3902	24.1778	23.7499	23.926	23.383	23.5362		0.535817	0.873977		-0.794807	0.772362		-0.213656	0.938938			0.918997		23.6623	23.2034	23.3047	24.1763	24.2317	24.1253	23.8191	23.9299	23.5007	24.7964	24.2891	24.2463	22.3721	24.239	23.7077	22.2075	23.3778	24.019	24.0691	22.1804	23.8764
HNRNPR	Heterogeneous nuclear ribonucleoprotein R	O43390;O43390-2;Q2L7G6;E7ETM7	24.2122	24.1493	23.9439	23.8784	23.7967	22.8847		-0.333755	0.950445		-0.352617	0.911969		-1.05914	0.709661			0.909468		24.0772	24.0013	24.558	24.2096	23.1488	25.0894	24.5463	22.9962	24.2891	24.6264	24.4298	24.9225	21.535	24.632	24.0935	22.5117	23.9495	24.239	22.6345	22.0955	22.5699
HOOK3	Protein Hook homolog 3	Q86VS8	27.8901	27.991	28.0162	27.9125	28.0349	28.0572		0.0224447	0.963703		0.0438843	0.965054		0.0410775	0.955566			0.935765		27.9595	27.8019	27.9089	28.0557	27.8564	28.0608	28.0608	27.8564	28.1312	27.9146	28.1263	27.8385	27.7708	28.0453	27.9259	28.3787	27.7895	27.7389	28.258	28.2077	28.0243
HP	Haptoglobin;Haptoglobin alpha chain;Haptoglobin beta chain	P00738;Q0VAC5;I3L0D3;H3BS21	26.8033	27.266	27.3633	26.7325	26.8065	26.8398		-0.0708036	0.960558		-0.459498	0.754298		-0.523508	0.667776			0.710129		27.2979	26.2262	26.8858	27.8623	27.1214	26.8142	27.6798	27.391	27.019	26.8504	26.7771	26.452	26.8504	26.6595	26.9316	26.9089	26.726	26.9869	26.2838	26.7645	27.3239
HPCAL1	Hippocalcin-like protein 1	P37235;E9PC71	29.0559	29.0607	29.0313	29.0046	29.039	29.0263		-0.0512416	0.961205		-0.0216956	0.986949		-0.00495513	0.995444			1		29.2239	28.9732	28.9705	29.027	28.9174	29.2376	28.9869	28.8445	29.2625	28.8858	29.4134	29.1189	28.6004	29.3066	29.1239	28.9705	28.7549	28.9002	29.3683	28.9923	28.8445
HPRT1	Hypoxanthine-guanine phosphoribosyltransferase	P00492;H7BY78	29.6243	29.5739	29.6368	29.6758	29.7281	29.7021		0.0514887	0.91392		0.154228	0.829084		0.0652868	0.895143			0.937583		29.7064	29.6595	29.5071	29.5071	29.5826	29.632	29.7453	29.6372	29.5278	29.6492	29.7129	29.8339	29.5071	29.8294	29.5463	29.9814	29.5555	29.6424	29.8843	29.4842	29.7973
HPS1	Hermansky-Pudlak syndrome 1 protein	Q92902-2;Q92902-4;Q92902;Q5TAA8	23.9456	24.5022	22.3316	24.1996	24.4338	24.6395		0.25404	0.931318		-0.0684225	0.974296		2.30791	0.271853			0.132923		24.632	24.3239	22.8809	24.3101	24.5926	24.604	22.1675	22.6072	22.2202	24.3645	23.2289	24.895	24.3101	24.417	25.0975	23.8764	24.3443	25.3778	24.5869	23.8858	24.7077
HPS4	Hermansky-Pudlak syndrome 4 protein	Q9NQG7-3;Q9NQG7-4;Q9NQG7;F1LLU8;Q9NQG7-2;E5RG08;F8VYA9	24.4372	24.8564	24.399	24.0356	24.8993	24.5967		-0.401587	0.898236		0.0428408	0.982179		0.197765	0.899356			0.845307		24.6971	24.4425	24.1719	25.1984	24.417	24.9539	23.7208	24.9716	24.5045	24.5926	24.5869	24.5344	22.4283	25.019	24.7024	25.1757	24.7	24.0576	24.8858	24.8191	24.6244
HPSE	Heparanase;Heparanase 8 kDa subunit;Heparanase 50 kDa subunit	E9PGR1;Q9Y251;E9PCA9;E9PHC3	30.9362	30.7924	30.8789	30.9251	31.0324	30.906		-0.0111416	0.987264		0.239987	0.641575		0.0271028	0.954637			0.847866		31.1115	30.9046	30.7927	30.8081	30.8157	30.7533	30.8004	30.8756	30.9609	31.0283	30.8756	30.7292	31.0673	31.1783	30.8901	31.1422	30.9188	30.7927	31.0414	30.7292	31.0608
HPX	Hemopexin	P02790	27.9928	27.8345	27.7107	27.9286	27.8648	27.9174		-0.0641839	0.9649		0.0302746	0.962484		0.206723	0.818424			0.961607		27.9428	27.8324	28.203	27.7895	27.7325	27.9814	27.4707	27.7581	27.9031	28.2077	28.4154	27.5014	27.5898	27.9372	27.8203	28.0084	27.6931	27.9202	27.8504	27.5536	28.3452
HRG	Histidine-rich glycoprotein	P04196	26.5189	27.0658	26.7405	26.6104	26.8832	27.1439		0.0914327	0.912079		-0.182555	0.842893		0.403371	0.563335			0.3097		26.5404	26.5898	26.4266	27.189	26.8385	27.17	26.8264	26.7771	26.6181	26.5898	26.8973	26.6865	26.2678	26.9089	27.2354	26.5624	26.8264	27.0505	26.8142	27.217	27.4938
HS1BP3	HCLS1-binding protein 3	Q53T59;F6TR53;B5MC96	26.3858	26.6071	26.5837	26.5522	26.7534	26.6749		0.166423	0.904689		0.146303	0.86906		0.0911427	0.885326			0.916428		26.3205	26.0105	26.8264	26.3014	26.8741	26.6458	26.726	26.2607	26.7645	26.1312	26.7895	26.8142	26.4738	26.9202	26.5609	27.0084	26.524	26.5667	26.8142	26.632	26.6865
HSD17B10	3-hydroxyacyl-CoA dehydrogenase type-2	Q99714;Q99714-2;Q5H928	28.618	29.0199	29.1704	29.2304	29.3299	29.0758		0.612473	0.53797		0.310034	0.747458		-0.0945354	0.886287			0.2202		28.5389	28.6285	28.6865	28.9595	29.0164	29.0839	29.0505	29.3869	29.0737	29.1189	29.1724	29.099	29.5315	29.7565	29.3131	29.114	29.1361	29.0531	29.1263	28.8173	29.3066
HSD17B12	Very-long-chain 3-oxoacyl-CoA reductase	Q53GQ0;E9PI21	25.5364	25.8875	25.9002	24.481	25.1651	25.5327		-1.0554	0.818828		-0.722386	0.630069		-0.367419	0.705822			0.550788		25.2021	25.7286	25.6784	25.4425	25.7871	26.433	25.3645	26.1833	26.1527	24.9539	23.0334	23.976	25.9606	25.0275	24.9716	25.4298	25.2317	25.6676	25.5783	25.4488	25.4362
HSD17B4	Peroxisomal multifunctional enzyme type 2;(3R)-hydroxyacyl-CoA dehydrogenase;Enoyl-CoA hydratase 2	P51659;E7EWE5;E9PB82;F5HE57;G5E9S2;E7ET17;E7ER27;E7EPL9	31.023	31.2171	31.0246	31.0539	31.1819	31.1774		0.030954	0.956446		-0.0352627	0.973145		0.152765	0.57806			0.839871		31.1901	30.9814	30.8973	31.2591	30.9539	31.4384	31.0608	30.933	31.08	30.8756	31.0017	31.1483	31.1901	31.1783	31.0283	31.4032	31.1177	31.0479	31.2814	31.1842	31.196
HSP90AA1	Heat shock protein HSP 90-alpha	P07900;P07900-2;Q86U12	32.8309	32.9015	32.8278	32.912	32.9893	32.9577		0.0810865	0.820616		0.0877679	0.79412		0.129903	0.650167			0.612859		32.8553	32.7692	32.8682	32.8682	32.8195	33.0167	32.8403	32.7333	32.9099	32.9522	32.966	32.9312	32.7985	33.0332	32.8956	33.0299	32.9983	32.9417	32.9677	32.8478	33.0737
HSP90AB1	Heat shock protein HSP 90-beta	P08238	30.9255	31.0304	31.1338	30.9598	31.167	31.0706		0.034356	0.880033		0.136546	0.828776		-0.0631987	0.906232			0.703753		30.8756	30.94	30.9609	30.9882	30.9609	31.1422	31.099	30.9882	31.3142	30.8901	30.9259	31.0283	30.995	31.3724	30.995	31.2591	31.0414	30.8973	31.0349	31.0414	31.3088
HSP90AB2P	Putative heat shock protein HSP 90-beta 2	Q58FF8	24.9887	25.9124	25.8237	25.6503	26.8242	26.77		0.661535	0.93519		0.911784	0.350823		0.946372	0.710412			0.868518		25.7415	26.9202	22.3044	25.5165	26.1332	26.0874	26.5195	24.3334	26.6181	22.7128	26.7518	26.7389	26.3975	27.0084	26.726	26.5754	26.9869	26.7518	27.1604	26.6865	26.4815
HSP90AB4P	Putative heat shock protein HSP 90-beta 4	Q58FF6	26.12	25.7436	25.3568	24.3744	25.4884	25.6958		-1.74565	0.819138		-0.255205	0.869428		0.339009	0.710526			0.770778		27.0914	25.5609	25.7077	25.965	25.4394	25.8264	25.5926	24.9672	25.5105	23.0337	26.3325	25.5225	22.6088	26.1015	25.5983	25.4892	24.7645	25.9672	25.8834	25.558	25.3745
HSP90B1	Endoplasmin	P14625;E9PEX3	33.4107	33.5176	33.486	33.5646	33.6228	33.5655		0.153858	0.771545		0.105283	0.870724		0.0794977	0.687432			0.842732		33.5062	33.3303	33.3956	33.4458	33.4334	33.6735	33.5179	33.4458	33.4943	33.5641	33.6629	33.5978	33.4334	33.6944	33.4823	33.9063	33.4083	33.4823	33.6629	33.5641	33.5527
HSPA13	Heat shock 70 kDa protein 13	P48723;F5GWS8	24.1641	23.5201	24.0249	24.1858	23.6526	24.1005		0.0216635	0.954522		0.132559	0.948808		0.0756674	0.774493			0.428284		24.1795	24.1719	24.141	23.5522	22.9638	24.0443	23.9043	24.0608	24.1095	24.2096	24.3031	24.1946	24.0359	24.0526	23.5638	23.0357	23.9584	24.0359	24.1795	24.1095	24.0772
HSPA1A	Heat shock 70 kDa protein 1A	H0YG33;P08107;F8VZJ4;F5H1D3;F5GZ62;E7EP94;Q5SP16	32.1	32.1025	32.1171	32.1952	32.1535	32.2695		0.0952533	0.817984		0.0510381	0.896041		0.15245	0.726611			0.838461		32.2019	32.0117	32.0864	31.9983	32.025	32.2842	32.1574	31.995	32.1989	32.2814	32.2365	32.1361	32.1269	32.1422	32.0864	32.2647	32.1208	32.0544	32.3115	32.2591	32.4532
HSPA4	Heat shock 70 kDa protein 4	P34932;F5H3R0	30.2455	30.4122	30.3423	30.2882	30.4314	30.5775		0.0427688	0.94362		0.0191646	0.986533		0.235219	0.636519			0.680363		30.2979	30.2077	30.2308	30.341	30.2759	30.6198	30.2979	30.2759	30.4532	30.2193	30.5296	30.3303	30.0737	30.5014	30.362	30.6544	30.2077	30.3724	30.611	30.5109	30.8157
HSPA5	78 kDa glucose-regulated protein	P11021	33.6561	33.7508	33.8288	33.6145	33.7049	33.6849		-0.0415408	0.932264		-0.0459464	0.94372		-0.143876	0.660731			0.84836		33.8516	33.5412	33.5754	33.7553	33.5641	33.933	33.8328	33.6944	33.9591	33.4943	33.5978	33.7353	33.6307	33.6735	33.6198	33.9063	33.6198	33.5866	33.7454	33.6522	33.7553
HSPA6	Heat shock 70 kDa protein 6	P17066;B4DHP5	28.5468	30.3038	29.9867	30.6635	29.8032	29.8315		2.11678	0.837562		-0.500574	0.869038		-0.155287	0.947543			0.91138		30.7453	24.4126	30.4823	30.94	30.5844	29.3869	30.099	29.8264	30.0349	30.7927	30.2077	30.8534	30.8004	28.8203	30.4134	29.258	30.7211	30.7292	28.8534	30.2647	29.4785
HSPA8	Heat shock cognate 71 kDa protein	P11142;E9PKE3;E9PNE6;P11142-2;A8K7Q2;E9PN89	34.1814	34.2447	34.3634	34.2508	34.2437	34.2953		0.0693782	0.817746		-0.00105667	0.999102		-0.0681067	0.864876			0.833134		34.2478	34.1975	34.099	34.2193	34.2048	34.3101	34.3303	34.2478	34.5121	34.2619	34.2689	34.2897	34.1827	34.1377	34.2759	34.4083	34.1529	34.2478	34.2828	34.2048	34.4458
HSPA9	Stress-70 protein, mitochondrial	B7Z4V2;P38646;F5H3L8	27.4866	28.0007	28.0265	28.2077	28.2892	28.2154		0.721147	0.546359		0.288491	0.822307		0.188877	0.763703			0.21856		27.6458	27.3745	27.4394	28.1361	27.9977	27.8682	27.9539	28.1065	28.019	28.0243	28.2399	28.1115	28.4551	28.6898	28.2216	28.4433	27.8019	28.5352	28.0137	28.019	28.2935
HSPB1	Heat shock protein beta-1	P04792;B4DL87;F8WE04	33.0531	32.9542	33.0885	33.0113	32.919	32.9635		-0.041804	0.961576		-0.0352879	0.943423		-0.124982	0.705518			0.915691		33.2336	33.1407	32.7849	33.0151	33.0864	32.7613	33.2336	32.9695	33.0625	33.0167	32.8828	33.2178	32.9277	32.8271	32.9099	32.9539	32.9848	32.9452	32.9171	33.0927	32.8991
HSPD1	60 kDa heat shock protein, mitochondrial	P10809	29.5214	29.9076	30.0771	30.0322	30.226	30.0486		0.510736	0.682519		0.31847	0.760157		-0.0285117	0.948477			0.228162		29.6303	29.3951	29.5389	30.0608	29.8339	29.8279	30.1115	30.1115	30.0084	29.995	29.893	29.8682	30.3724	30.611	30.1483	30.2869	29.8579	30.0217	29.877	30.1115	30.1842
HSPE1	10 kDa heat shock protein, mitochondrial	P61604;B8ZZL8	29.5058	29.5969	29.8796	30.0305	30.1066	29.9335		0.524739	0.752499		0.509668	0.712284		0.0538247	0.957939			0.637121		29.6004	29.3217	29.5951	29.8142	29.3515	29.6251	30.0479	30.0084	29.5826	30.0479	29.7692	29.8916	30.4134	30.5934	30.2308	29.8096	29.7927	30.2647	29.94	29.4053	30.1239
HSPH1	Heat shock protein 105 kDa	Q92598-2;Q92598-3;Q92598;B4DYH1;B4DY72	28.1103	28.2014	28.1545	28.3699	28.2753	28.3513		0.259595	0.651524		0.0738179	0.944141		0.196758	0.709867			0.834732		28.0505	28.189	28.0914	27.8623	28.4354	28.3066	28.0762	28.189	28.1984	28.2308	28.4314	28.4512	28.3662	28.4785	28.2625	28.3787	27.9814	28.4073	28.2123	28.1604	28.6251
HTATIP2	Oxidoreductase HTATIP2	Q9BUP3-3;Q9BUP3;E9PI87	26.4327	26.1923	26.1675	26.545	26.3565	26.3267		0.112322	0.919292		0.16424	0.896494		0.159222	0.916015			0.939097		26.726	26.4041	26.1681	26.5165	25.8904	26.17	26.3877	26.0894	26.0254	26.8142	26.2244	26.3273	26.8142	26.9316	25.976	26.1965	26.3222	26.1273	25.8552	26.1449	27.1795
HTRA2	Serine protease HTRA2, mitochondrial	O43464-2;O43464-3;O43464;O43464-4	23.7308	24.5618	24.5299	24.8177	24.2676	24.7542		1.0869	0.639047		-0.294149	0.914757		0.224328	0.884271			0.769524		24.4105	23.2461	23.5358	24.8385	24.417	24.4298	24.3712	24.6031	24.6153	24.945	24.4614	24.7234	25.141	24.7543	24.918	22.7661	24.632	24.0854	25.4298	24.4041	25.0975
HTT	Huntingtin	P42858	28.4994	28.51	28.5166	28.5022	28.5083	28.6049		0.00279935	0.998454		-0.00173632	0.998521		0.0883174	0.742492			0.979151		28.4785	28.6831	28.3367	28.524	28.4746	28.5315	28.5014	28.5934	28.4551	28.3869	28.7958	28.3869	28.4394	28.7613	28.4433	28.3196	28.509	28.524	28.7421	28.611	28.5426
HUWE1	E3 ubiquitin-protein ligase HUWE1	Q7Z6Z7-3;Q7Z6Z7;Q7Z6Z7-2;H0Y5W0	29.2924	29.2369	29.2179	29.3659	29.3484	29.3001		0.0734951	0.862159		0.111501	0.828449		0.0821527	0.712211			0.842517		29.3303	29.2512	29.2957	29.0864	29.189	29.4354	29.1652	29.2216	29.267	29.2935	29.57	29.3044	29.2957	29.4274	29.2869	29.3131	29.3662	29.2216	29.3787	29.2422	29.3578
HYI	Putative hydroxypyruvate isomerase;Hydroxypyruvate isomerase	H0YB70;Q5T015;Q5T013-4;Q5T013;H0YB18;Q5T014;E7EWH8;Q5T013-2;Q5T013-3;Q5T017	24.631	25.6392	25.5621	25.3361	25.4757	25.8698		0.705121	0.852947		-0.163498	0.773918		0.307671	0.789885			0.710048		25.4953	22.9269	25.4707	25.6292	25.7871	25.5014	25.8764	25.7995	25.0105	25.2499	25.391	25.2021	25.5014	25.4041	25.6181	25.317	25.5638	25.7746	26.2426	25.7103	25.7518
HYOU1	Hypoxia up-regulated protein 1	E9PL22;F5H4Z5;Q9Y4L1;F5H4X7;E9PJ21;F5GWH9;B7Z909	30.4186	30.3633	30.4932	30.5737	30.636	30.5004		0.155094	0.813074		0.272741	0.701601		0.00717322	0.985547			0.686043		30.5296	30.4727	30.2535	30.3088	30.2422	30.5389	30.5844	30.4032	30.4919	30.6544	30.5664	30.611	30.4629	30.6714	30.5296	30.8608	30.4823	30.611	30.6458	30.393	30.3515
IAH1	Isoamyl acetate-hydrolyzing esterase 1 homolog	H7C5G1;B4DMV3;Q2TAA2	24.6456	24.0507	24.2131	24.7458	24.8516	25.183		0.100125	0.975762		0.800954	0.742992		0.969896	0.697364			0.838764		23.2748	25.2678	25.3943	23.2801	24.4614	24.4105	23.2964	25.2821	24.0608	24.4488	24.4141	24.918	25.2021	24.5225	25.2535	24.3239	25.3066	25.5045	25.0732	24.4362	25.7182
IARS	Isoleucine--tRNA ligase, cytoplasmic	P41252	26.4035	25.6748	25.805	25.8069	25.755	25.9652		-0.596557	0.705263		0.080126	0.973228		0.160163	0.89525			0.767937		26.0484	26.53	26.632	25.019	25.7234	26.2821	25.2317	26.0211	26.1623	25.8717	26.0711	25.7415	25.5433	26.1214	25.6153	25.4138	25.8694	25.9066	26.2002	25.6209	26.1332
ICAM2	Intercellular adhesion molecule 2	P13598	28.0771	28.0913	28.0086	28.0735	27.7596	27.7415		-0.00355291	0.998093		-0.331673	0.825259		-0.267094	0.775464			0.902153		27.5754	28.5898	28.066	27.6865	28.5898	27.9977	27.9923	28.189	27.8445	28.4073	27.7645	27.9428	28.1795	28.1115	27.7518	27.6663	27.509	28.0864	27.5969	27.3066	27.976
IDE	Insulin-degrading enzyme	P14735	25.7084	25.432	25.5159	25.8874	25.6453	25.7256		0.178986	0.886682		0.213262	0.835299		0.209702	0.704088			0.786644		25.1488	26.0359	25.9406	25.1984	25.5165	25.5812	25.2678	25.7103	25.5696	25.8881	25.8623	25.9584	25.8409	25.5841	25.4707	26.0464	25.48	25.8858	25.5841	25.6784	25.7543
IDH1	Isocitrate dehydrogenase [NADP] cytoplasmic	O75874	30.5201	30.465	30.5559	30.5196	30.5861	30.5566		-0.000504176	0.997057		0.121149	0.837079		0.000676791	1			0.966777		30.5109	30.5014	30.5481	30.5934	30.2535	30.5481	30.7129	30.4629	30.4919	30.4629	30.7292	30.4629	30.4234	30.6629	30.611	30.4334	30.6372	30.5109	30.6198	30.3828	30.7129
[truncated: 1,396 more rows]
