# Supplementary material
Source: publisher figshare collection journal article supplement (https://tandf.figshare.com/articles/dataset/_/6002054)
Supplement: Supplementary file 1 [file 2 › Salunkhe et al Table S2 Nov17.xlsx]

## Sheet: GO TERMS DE Proteins
Biological Process
#pathway ID	pathway description	Gene Nr.	FDR	Proteins in the network
GO.0072376	protein activation cascade	5	5.7e-05	APOH,C4BPA,CFH,GP5,VWF
GO.0007597	blood coagulation, intrinsic pathway	3	0.00229	APOH,GP5,VWF
GO.0030198	extracellular matrix organization	6	0.00229	EMILIN1,LTBP1,NID1,NID2,THBS1,VWF
GO.0072378	blood coagulation, fibrin clot formation	3	0.005	APOH,GP5,VWF
GO.0031589	cell-substrate adhesion	4	0.0275	GP5,NID1,NID2,VWF
GO.1903034	regulation of response to wounding	5	0.0357	APOH,C4BPA,CFH,GP5,THBS1
Molecular Function
#pathway ID	pathway description	Gene Nr.	FDR	Proteins in the network
GO.0001948	glycoprotein binding	5	1.57e-05	APOH,CFH,NID1,THBS1,VWF
GO.0005518	collagen binding	4	0.000165	NID1,NID2,THBS1,VWF
GO.0043394	proteoglycan binding	3	0.000609	CFH,NID1,THBS1
Cellular Component
#pathway ID	pathway description	Gene Nr.	FDR	Proteins in the network
GO.0005576	extracellular region	15	0.000177	APOH,C4BPA,CFH,DECR1,EMILIN1,FH,GP5,LTBP1,MMRN1,NID1,NID2,THBS1,TMED10,VAT1,VWF
GO.0044421	extracellular region part	14	0.000177	APOH,C4BPA,CFH,DECR1,EMILIN1,FH,GP5,LTBP1,NID1,NID2,THBS1,TMED10,VAT1,VWF
GO.0031012	extracellular matrix	6	0.000206	EMILIN1,LTBP1,NID1,NID2,THBS1,VWF
GO.0031988	membrane-bounded vesicle	13	0.000206	APOH,CFH,DECR1,EMILIN1,FH,GP5,MMRN1,NID1,NID2,THBS1,TMED10,VAT1,VWF
GO.0070062	extracellular exosome	12	0.000206	APOH,CFH,DECR1,EMILIN1,FH,GP5,NID1,NID2,THBS1,TMED10,VAT1,VWF
GO.0005578	proteinaceous extracellular matrix	5	0.00199	EMILIN1,LTBP1,NID1,NID2,VWF
GO.0031093	platelet alpha granule lumen	3	0.002	MMRN1,THBS1,VWF
GO.0031091	platelet alpha granule	3	0.0036	MMRN1,THBS1,VWF
GO.0030141	secretory granule	4	0.0162	MMRN1,THBS1,TMED10,VWF
GO.0044420	extracellular matrix component	3	0.0182	LTBP1,NID1,NID2
KEGG
#pathway ID	pathway description	Gene Nr.	FDR	Proteins in the network
4512	ECM-receptor interaction	3	0.0108	GP5,THBS1,VWF
4610	Complement and coagulation cascades	3	0.0108	C4BPA,CFH,VWF

## Sheet: GO TERMS DOWN DE Proteins
Biological Process
#pathway ID	pathway description	Gene Nr.	FDR	Proteins in the network
GO.0030198	extracellular matrix organization	6	0.000224	EMILIN1,LTBP1,NID1,NID2,THBS1,VWF
GO.0031589	cell-substrate adhesion	4	0.00844	GP5,NID1,NID2,VWF
GO.0030168	platelet activation	4	0.0336	GP5,MMRN1,THBS1,VWF
GO.0002576	platelet degranulation	3	0.0403	MMRN1,THBS1,VWF
GO.0006887	exocytosis	4	0.0403	MMRN1,THBS1,TMED10,VWF
GO.0071711	basement membrane organization	2	0.0403	NID1,NID2
Molecular Function
#pathway ID	pathway description	Gene Nr.	FDR	Proteins in the network
GO.0005518	collagen binding	4	4.91e-05	NID1,NID2,THBS1,VWF
GO.0001948	glycoprotein binding	3	0.0168	NID1,THBS1,VWF
GO.0043236	laminin binding	2	0.0415	NID1,THBS1
GO.0043394	proteoglycan binding	2	0.0415	NID1,THBS1
GO.0050431	transforming growth factor beta binding	2	0.0415	LTBP1,THBS1
Cellular Component
#pathway ID	pathway description	Gene Nr.	FDR	Proteins in the network
GO.0031012	extracellular matrix	6	6.52e-05	EMILIN1,LTBP1,NID1,NID2,THBS1,VWF
GO.0005578	proteinaceous extracellular matrix	5	0.000903	EMILIN1,LTBP1,NID1,NID2,VWF
GO.0031093	platelet alpha granule lumen	3	0.00186	MMRN1,THBS1,VWF
GO.0031091	platelet alpha granule	3	0.00255	MMRN1,THBS1,VWF
GO.0005576	extracellular region	10	0.00379	EMILIN1,GP5,LTBP1,MMRN1,NID1,NID2,THBS1,TMED10,VAT1,VWF
GO.0030141	secretory granule	4	0.00413	MMRN1,THBS1,TMED10,VWF
GO.0031988	membrane-bounded vesicle	9	0.00413	EMILIN1,GP5,MMRN1,NID1,NID2,THBS1,TMED10,VAT1,VWF
GO.0044420	extracellular matrix component	3	0.00521	LTBP1,NID1,NID2
GO.0044421	extracellular region part	9	0.00521	EMILIN1,GP5,LTBP1,NID1,NID2,THBS1,TMED10,VAT1,VWF
GO.0070062	extracellular exosome	8	0.00521	EMILIN1,GP5,NID1,NID2,THBS1,TMED10,VAT1,VWF
GO.0044433	cytoplasmic vesicle part	4	0.0195	MMRN1,THBS1,TMED10,VWF
KEGG
#pathway ID	pathway description	Gene Nr.	FDR	Proteins in the network
4512	ECM-receptor interaction	3	0.00551	GP5,THBS1,VWF

## Sheet: GO TERMS UP DE Proteins
Biological Process
#pathway ID	pathway description	Gene Nr.	FDR	Proteins in the network
GO.0072376	protein activation cascade	3	0.0146	APOH,C4BPA,CFH
