# Supplementary material
Source: publisher figshare collection journal article supplement (https://tandf.figshare.com/articles/dataset/_/6002054)
Supplement: Supplementary file 1 [file 2 › Salunkhe et al Table S3 Nov17.xlsx]

## Sheet: Salunkhe et al Table S3
Supplementary Table 3: Proteomic Analysis of Fresh Platelets and Control PC Lysates through Storage
Indicated are the Average Log2 LFQ in Fresh Platelets and Control PCs samples at Days 1, 2, 6 and 8 of Storage, Log2 LFQ fold ratios Control at different Days vs Fresh Platelets, FDR (T test),
Multiple Sample test ANOVA FDR, and the individual Log2 LFQ values on Fresh Platelets and Control PC Samples.
LFQ = Label Free Quantification; FDR = false discovery rate; C = Control; D = Day; D0 = Fresh Platelets.
			Average Log2 LFQ						Log2 LFQ Ratio and T test																					ANOVA		Log2 LFQ
Gene names	Protein names	Majority protein IDs	D0	D1	D2	D6	D8		D1 vs D0	FDR		D2 vs D0	FDR		D6 vs D0	FDR		D8 vs D0	FDR		D2 vs D1	FDR		D6 vs D1	FDR		D8 vs D1	FDR		FDR		D0 1	D0 2	D0 3	D1 1	D1 2	D1 3	C D2 1	C D2 2	C D2 3	C D6 1	C D6 2	C D6 3	C D8 1	C D8 2	C D8 3
A1BG	Alpha-1B-glycoprotein	P04217;P04217-2	27.5265	27.475	27.7239	27.4965	27.5977		-0.0514247	0.953603		0.197442	0.861278		-0.0299384	0.978929		0.0712732	0.921597		0.248866	0.469007		0.0214863	0.970466		0.122698	0.785027		0.85415		27.7833	27.7771	27.019	27.2262	27.5463	27.6527	27.6251	27.7325	27.8142	27.6527	27.3662	27.4707	27.3494	27.7708	27.673
A2M	Alpha-2-macroglobulin	H0YGH4;P01023	27.345	24.9628	27.094	26.6688	26.0279		-2.38216	0.612104		-0.251003	0.862749		-0.676191	0.569324		-1.31712	0.426739		2.13116	0.560183		1.70597	0.746222		1.06505	0.783268		0.519411		27.2891	27.5014	27.2445	26.1015	26.8385	21.9486	27.632	26.433	27.217	26.8858	26.3187	26.8019	25.2678	26.6458	26.17
AAMDC	Mth938 domain-containing protein	E9PR47;Q9H7C9;E9PNP3;E9PIQ4	25.4614	25.0677	25.1279	24.0996	24.4448		-0.393667	0.716139		-0.333444	0.847092		-1.36176	0.684219		-1.01657	0.548286		0.0602233	0.952663		-0.968093	0.782305		-0.6229	0.658384		0.636182		26.0752	25.1332	25.1757	25.0813	24.6264	25.4953	24.9847	24.8528	25.5463	24.867	25.1946	22.2372	24.8997	24.9628	23.4719
AARS	Alanine--tRNA ligase, cytoplasmic	P49588	29.9585	30.0503	29.9677	30.0349	30.1924		0.0918547	0.588874		0.00924873	0.873738		0.0764662	0.779363		0.233992	0.430666		-0.082606	0.513263		-0.0153885	0.970582		0.142137	0.529282		0.392622		29.9539	29.9814	29.94	30.1483	29.9677	30.0349	29.9814	29.9677	29.9539	30.0084	29.8887	30.2077	30.2077	30.0608	30.3088
AASDHPPT	L-aminoadipate-semialdehyde dehydrogenase-phosphopantetheinyl transferase	Q9NRN7;E9PNF3;E9PLW6	25.7949	26.0493	26.0113	25.6955	25.8619		0.254385	0.714019		0.216405	0.813326		-0.0994644	0.85238		0.0670052	0.868815		-0.0379804	0.963759		-0.353849	0.705183		-0.18738	0.784055		0.680451		25.8973	25.604	25.8834	26.1253	26.4186	25.604	25.9089	26.1253	25.9998	25.4583	25.6348	25.9933	25.7234	25.7312	26.1312
ABCC4	Multidrug resistance-associated protein 4	O15439-2;O15439;B7Z3Q7;O15439-3	25.3302	25.4385	25.6939	25.6018	25.9802		0.108241	0.865196		0.363691	0.79496		0.271622	0.704724		0.649935	0.455085		0.25545	0.456368		0.163381	0.688747		0.541694	0.383031		0.303644		24.9803	25.3239	25.6865	25.3273	25.6676	25.3205	25.8457	25.6096	25.6264	25.5492	25.5725	25.6838	25.7645	26.2445	25.9316
ABCD3	ATP-binding cassette sub-family D member 3	F5GYC1;E7EUE1;P28288-2;P28288	23.1918	24.0915	23.9963	23.6996	23.4475		0.899701	0.54983		0.804434	0.848782		0.507727	0.685431		0.255705	0.859309		-0.095267	0.903817		-0.391974	0.683302		-0.643996	0.646184		0.531599		23.0081	23.867	22.7004	24.6268	23.8093	23.8385	23.886	23.9933	24.1095	23.5983	23.5869	23.9134	23.8273	24.0105	22.5048
ABCE1	ATP-binding cassette sub-family E member 1	P61221;D6R9I9;D6RGF4	28.0066	28.0128	28.0379	28.048	28.1298		0.00628726	0.982264		0.0313155	0.828531		0.0414626	0.713636		0.123252	0.574152		0.0250282	0.934512		0.0351753	0.920598		0.116964	0.720318		0.77115		27.9977	27.9977	28.0243	28.0349	27.8385	28.1652	28.0505	27.9869	28.0762	28.0762	27.9814	28.0864	28.267	27.9814	28.141
ABCF1	ATP-binding cassette sub-family F member 1	Q8NE71-2;Q8NE71;H0YGW7	26.173	25.9517	26.1383	25.8926	25.8695		-0.221355	0.658175		-0.0347729	0.949117		-0.28041	0.656076		-0.303574	0.50406		0.186582	0.674107		-0.0590553	0.942784		-0.0822194	0.873308		0.635642		26.2803	26.1135	26.1253	26.0401	25.6431	26.1719	25.9428	26.2944	26.1776	25.558	25.9672	26.1527	25.6944	26.1194	25.7945
ABHD10	Mycophenolic acid acyl-glucuronide esterase, mitochondrial	Q9NUJ1;B7Z6A8	25.5838	25.7304	25.7875	25.8435	26.317		0.146534	0.740293		0.203688	0.823277		0.259665	0.793812		0.733165	0.453491		0.0571543	0.916192		0.113131	0.929167		0.586631	0.462736		0.523189		25.452	25.792	25.5075	25.902	25.8215	25.4676	25.6838	25.6513	26.0275	26.512	25.4488	25.5696	26.5195	26.632	25.7995
ABHD11	Alpha/beta hydrolase domain-containing protein 11	Q8NFV4-4;Q8NFV4;H7BYM8	26.2706	26.6796	26.9863	27.0275	27.2681		0.409038	0.744759		0.715722	0.820427		0.75698	0.642694		0.997559	0.472757		0.306684	0.679891		0.347942	0.814353		0.588521	0.525734		0.452691		26.3926	25.5926	26.8264	26.8385	27.1312	26.0691	27.0296	26.9977	26.9316	27.5165	26.9202	26.6458	27.0608	27.632	27.1115
ABHD14B	Alpha/beta hydrolase domain-containing protein 14B	B4DNR3;Q96IU4;F8W9U3;B4DQI4	29.5031	29.3643	29.2688	29.3135	29.3191		-0.138796	0.715725		-0.234377	0.678982		-0.189603	0.615433		-0.184022	0.429814		-0.0955804	0.808429		-0.050806	0.925543		-0.0452258	0.903091		0.59926		29.5146	29.4707	29.524	29.4473	29.5518	29.094	29.2869	29.3662	29.1532	29.3217	29.1795	29.4394	29.3452	29.2376	29.3745
ABHD16A	Abhydrolase domain-containing protein 16A	O95870;O95870-2;F6WSP1	26.6038	26.5321	26.8747	27.1169	27.5103		-0.0717347	0.963904		0.270952	0.876309		0.513095	0.710802		0.906546	0.514162		0.342686	0.677639		0.584829	0.629619		0.978281	0.411676		0.413942		25.8764	27.2891	26.6458	25.9473	27.1115	26.5374	26.673	27.0084	26.9428	26.9539	27.1984	27.1984	27.2445	27.4785	27.8081
ABHD4	Abhydrolase domain-containing protein 4	F5H6T0;B4DDH7;Q8TB40;F5GZC9;H0YFD5;F5H067	24.4776	24.2192	23.7183	23.8251	24.0595		-0.258411	0.798856		-0.759281	0.843536		-0.652507	0.73557		-0.418125	0.723112		-0.50087	0.774631		-0.394096	0.843474		-0.159714	0.86584		0.851154		24.8093	23.7995	24.824	23.9225	24.5404	24.1946	22.9386	25.0732	23.1431	24.4551	22.8406	24.1795	24.3307	23.4114	24.4362
ABHD5	1-acylglycerol-3-phosphate O-acyltransferase ABHD5	Q8WTS1	24.4502	24.191	24.4885	24.4604	24.7643		-0.259199	0.544067		0.0383224	0.97152		0.0101287	0.981056		0.314063	0.44839		0.297521	0.564343		0.269327	0.577236		0.573262	0.303532		0.347413		24.4041	24.3712	24.5754	24.275	24.2961	24.002	24.4862	24.8385	24.141	24.2961	24.4923	24.5926	24.9361	24.6865	24.6703
ABI1	Abl interactor 1	F5H1G9;F8WA55;F8WA56;A6NFN2;Q8IZP0-10;Q8IZP0-8;Q8IZP0-7;Q8IZP0-2;Q8IZP0-4;Q8IZP0-3;Q8IZP0-5;Q8IZP0-6;Q8IZP0-9;Q8IZP0;H7BXI6;Q8IZP0-11	30.0362	30.325	30.2225	30.2028	30.1874		0.288841	0.547529		0.186326	0.808083		0.166624	0.788348		0.151246	0.61122		-0.102514	0.719827		-0.122217	0.871786		-0.137594	0.561589		0.713852		29.8872	29.9677	30.2535	30.1483	30.4032	30.4234	30.3724	30.196	30.099	29.8534	30.2535	30.5014	30.1604	30.2535	30.1483
ABLIM1	Actin-binding LIM protein 1	F8WAB1;F8WAB0;F8W8M4;A6NKJ2;Q5T6N4;A6NCD9;Q5T6N2;O14639-2;O14639;Q5JVV3	27.0795	27.5871	27.3594	27.5421	27.3291		0.507615	0.543148		0.279946	0.850916		0.462628	0.628277		0.24966	0.732754		-0.227669	0.682576		-0.0449867	0.915415		-0.257954	0.566658		0.594623		26.6865	27.5014	27.0505	27.632	27.6663	27.4629	27.7895	27.2803	27.0084	27.3828	27.524	27.7195	27.632	27.0401	27.3153
ABLIM3	Actin-binding LIM protein 3	O94929-2;O94929-3;O94929	27.5445	27.1657	26.9825	26.9669	27.0706		-0.378801	0.45039		-0.562006	0.432172		-0.577574	0.772957		-0.473918	0.423721		-0.183205	0.266733		-0.198772	0.630968		-0.0951163	0.738414		0.192598		27.4314	27.509	27.6931	27.2262	27.0914	27.1795	26.9977	27.0296	26.9202	26.7645	26.976	27.1604	27.17	27.1795	26.8623
ABRACL	Costars family protein ABRACL	Q9P1F3	28.4188	28.2909	28.366	28.2176	28.3018		-0.127939	0.900114		-0.0528685	0.97048		-0.201225	0.813572		-0.117031	0.85351		0.0750707	0.927981		-0.0732861	0.944918		0.0109081	0.990404		0.969402		28.5389	27.9595	28.7581	28.1361	28.7771	27.9595	28.2399	28.2399	28.6181	28.1937	27.9202	28.5389	28.1115	28.3745	28.4194
ACAA1	3-ketoacyl-CoA thiolase, peroxisomal	P09110;C9JDE9;F5GXL8;H7C131;G5E935	26.8647	26.9927	26.7948	26.9172	26.7794		0.12797	0.752438		-0.0698783	0.874367		0.0525392	0.892931		-0.0852667	0.861275		-0.197849	0.562526		-0.0754312	0.898977		-0.213237	0.703706		0.814642		26.7895	26.7645	27.0401	27.2535	26.8504	26.8741	26.9202	26.7645	26.6998	26.8858	26.7645	27.1015	26.5711	27.1214	26.6458
ACACA	Acetyl-CoA carboxylase 1;Biotin carboxylase	Q13085-3;Q13085-2;Q13085;Q13085-4;F8W6G0	24.3611	23.0265	22.941	24.3503	24.5004		-1.33457	0.610718		-1.42013	0.788155		-0.010767	0.993324		0.139337	0.937576		-0.0855535	0.968688		1.3238	0.672367		1.47391	0.480397		0.450283		24.0552	25.2856	23.7425	22.294	22.4011	24.3844	23.3289	22.8952	22.5987	24.4984	23.1914	25.3612	24.7645	23.5649	25.1719
ACADM	Medium-chain specific acyl-CoA dehydrogenase, mitochondrial	B7Z9I1;Q5T4U5;P11310;P11310-2;B4DJE7	26.3533	26.6285	26.5812	26.8509	27.1454		0.275264	0.802009		0.227981	0.874656		0.497631	0.698668		0.792168	0.478855		-0.0472832	0.954604		0.222367	0.845052		0.516904	0.466658		0.471384		26.0935	27.019	25.9473	26.7129	27.0084	26.1642	26.8142	26.5045	26.425	26.965	26.5165	27.0711	27.17	27.2262	27.0401
ACADSB	Short/branched chain specific acyl-CoA dehydrogenase, mitochondrial	B4DQ51;P45954	25.9957	25.9976	26.3905	26.5302	26.824		0.00184059	0.997551		0.394716	0.426814		0.534425	0.575355		0.82824	0.440139		0.392875	0.287207		0.532585	0.545356		0.826399	0.351571		0.197607		26.0752	25.9361	25.976	25.8504	25.918	26.2244	26.3511	26.3762	26.4441	26.7389	26.2335	26.6181	26.4346	26.9869	27.0505
ACADVL	Very long-chain specific acyl-CoA dehydrogenase, mitochondrial	G3V1M7;P49748-2;P49748;F5H2A9	26.5654	26.6239	26.8634	26.9624	27.0213		0.0585607	0.960416		0.298068	0.824586		0.396985	0.671596		0.455976	0.581219		0.239508	0.762872		0.338425	0.78009		0.397415	0.674759		0.687341		26.1469	26.5624	26.9869	26.3239	27.2535	26.2944	26.8264	26.7771	26.9869	27.1984	26.8264	26.8623	26.8264	27.4234	26.8142
ACAP2	Arf-GAP with coiled-coil, ANK repeat and PH domain-containing protein 2	Q15057	27.3696	26.7383	27.3728	27.0683	27.1131		-0.631288	0.522633		0.00327873	0.996783		-0.301217	0.663004		-0.25648	0.613205		0.634567	0.217144		0.33007	0.541437		0.374808	0.383707		0.239419		27.5536	26.9869	27.5682	26.965	26.604	26.6458	27.3239	27.4707	27.3239	27.189	26.976	27.0401	27.0914	27.2077	27.0401
ACAT1	Acetyl-CoA acetyltransferase, mitochondrial	P24752;H0YEL7;G3XAB4	23.21	22.4707	24.1163	23.3318	23.4834		0	0		0	0		0	0		0.273427	0.909272		0	0		0	0		1.01268	0.659062		0.573597		23.6299	23.8954	22.1047	22.9597	21.4723	22.9803	24.6328	23.6288	24.0872	22.9899	23.4883	23.5173	24.7594	22.2006	23.4902
ACAT2	Acetyl-CoA acetyltransferase, cytosolic	Q9BWD1;B7Z233	29.0202	29.3934	29.1512	29.3118	29.3257		0.373209	0.539176		0.130962	0.82591		0.291655	0.624368		0.305529	0.60982		-0.242247	0.377796		-0.0815544	0.879474		-0.0676804	0.908924		0.565268		28.8142	29.0788	29.1676	29.1984	29.4995	29.4823	29.1483	29.1937	29.1115	29.2193	29.17	29.5463	29.6544	28.94	29.3828
ACBD3	Golgi resident protein GCP60	Q9H3P7	25.3671	24.3888	25.2258	25.3885	25.3267		-0.97824	0.660182		-0.141224	0.82659		0.0214189	0.981627		-0.0403907	0.942922		0.837016	0.629994		0.999659	0.688855		0.93785	0.630167		0.585297		25.1871	25.3679	25.5463	25.0894	25.1795	22.8976	25.2535	25.3066	25.1174	25.0275	25.3811	25.7569	25.4008	24.9584	25.6209
ACLY	ATP-citrate synthase	E7ENH9;P53396;P53396-2;B4E3P0	31.1285	31.1304	31.1518	31.215	31.2009		0.00192006	0.998533		0.0233409	0.949234		0.086539	0.816055		0.072422	0.723674		0.0214208	0.928551		0.0846189	0.86193		0.070502	0.737869		0.909793		31.2308	30.9882	31.1664	31.1483	30.995	31.2478	31.2077	31.13	31.1177	31.0927	31.1239	31.4284	31.2591	31.13	31.2135
ACO1	Cytoplasmic aconitate hydratase;Aconitate hydratase	P21399;Q9HBB2;Q59FI0	30.1792	30.1465	30.2067	30.2832	30.2958		-0.0326449	0.915448		0.0275523	0.950559		0.104067	0.770122		0.116601	0.65404		0.0601972	0.68389		0.136712	0.653644		0.149246	0.461741		0.655991		30.2422	30.0084	30.2869	30.1724	30.2193	30.0479	30.2647	30.2193	30.1361	30.3515	30.1361	30.362	30.3515	30.1842	30.3515
ACO2	Aconitate hydratase, mitochondrial	A2A274;Q99798;F5H2A5;B4DW08	27.3947	27.6762	27.713	28.0438	28.1646		0.281584	0.687758		0.318305	0.813821		0.649169	0.594221		0.769895	0.44528		0.0367209	0.961536		0.367585	0.641954		0.488311	0.471906		0.298819		27.189	27.6798	27.3153	27.6998	28.0137	27.3153	27.8324	27.4862	27.8203	28.0608	27.8445	28.2262	28.258	28.4032	27.8324
ACOT13	Acyl-coenzyme A thioesterase 13;Acyl-coenzyme A thioesterase 13, N-terminally processed	F5H2L4;Q9NPJ3	24.8906	24.9399	24.7722	25.1771	24.5887		0.0492535	0.968962		-0.118383	0.935631		0.286472	0.779238		-0.30189	0.879908		-0.167636	0.832354		0.237218	0.83917		-0.351144	0.865423		0.925017		24.391	25.452	24.8288	24.7543	25.5014	24.5638	24.7077	24.9225	24.6865	25.1371	25.4138	24.9803	25.4457	25.2571	23.0633
ACOT7	Cytosolic acyl coenzyme A thioester hydrolase	O00154-4;O00154-6;O00154;B4DUX0;O00154-5;O00154-2;O00154-3	28.4797	28.1357	28.4098	28.3006	28.4372		-0.344037	0.550567		-0.0698884	0.91179		-0.179061	0.714981		-0.0425231	0.910092		0.274148	0.293561		0.164975	0.58301		0.301514	0.32629		0.362815		28.7162	28.2445	28.4785	28.0401	28.2308	28.1361	28.4194	28.5165	28.2935	28.17	28.341	28.391	28.341	28.5352	28.4354
ACOT8	Acyl-coenzyme A thioesterase 8	H7C5A7;E9PJN0;A6NDT2;O14734;H0Y698;Q9BR14;E9PMC4;G5E995;E9PIS4;E9PRD4	24.0349	25.1613	23.9009	24.8226	24.9646		1.12637	0.604198		-0.134043	0.972222		0.787668	0.721144		0.929698	0.618342		-1.26041	0.326955		-0.338701	0.547296		-0.196671	0.770609		0.453204		24.019	25.2207	22.865	25.0062	25.2133	25.2643	24.7594	23.6118	23.3314	24.7286	25.0105	24.7286	24.976	24.5105	25.4073
ACOT9	Acyl-coenzyme A thioesterase 9, mitochondrial	Q9Y305-3;Q9Y305-2;Q9Y305;Q9Y305-4	24.8789	25.0811	24.2117	25.0873	25.157		0.202175	0.824633		-0.667233	0.850702		0.208382	0.832986		0.278054	0.57021		-0.869408	0.639416		0.00620651	0.999		0.0758788	0.914853		0.666517		24.6918	24.7024	25.2426	24.5522	25.5463	25.1449	24.7746	25.1174	22.7431	25.6403	24.6811	24.9406	25.217	25.0975	25.1565
ACOX1	Peroxisomal acyl-coenzyme A oxidase 1	Q15067-2;Q15067;F5GYQ8;F5H0M0	29.2124	29.4215	29.1538	29.3459	29.294		0.209093	0.669648		-0.0586052	0.940146		0.133494	0.829091		0.0815461	0.850377		-0.267698	0.355073		-0.075599	0.895568		-0.127547	0.618282		0.697349		28.9372	29.4785	29.2216	29.4629	29.5146	29.2869	29.2216	28.9977	29.2422	29.2891	29.1288	29.6198	29.3869	29.1435	29.3515
ACP1	Low molecular weight phosphotyrosine protein phosphatase	P24666;G5E9R5;B5MCC7;P24666-3;P24666-2;F2Z2Q9;C9JNS5	28.5338	28.6098	28.6154	28.9102	28.9275		0.0760282	0.860844		0.0816358	0.87477		0.376405	0.603978		0.393762	0.437184		0.0056076	0.993052		0.300377	0.589613		0.317734	0.46024		0.314391		28.6931	28.3992	28.509	28.8593	28.391	28.579	28.6424	28.4394	28.7645	28.965	28.7895	28.976	29.0634	28.7708	28.9484
ACP2	Lysosomal acid phosphatase	P11117;E9PHY0;E9PQY3;F5H1S6;E9PP23;B7Z7D2;F5GWV7	25.5445	25.0795	25.3916	25.1907	25.3518		-0.465006	0.544473		-0.152866	0.829987		-0.3538	0.566304		-0.19266	0.655477		0.31214	0.499759		0.111206	0.870967		0.272346	0.617431		0.421055		25.3443	25.7518	25.5374	24.7338	25.3443	25.1604	25.2926	25.3778	25.5045	25.2643	25.1095	25.1984	25.1795	25.5869	25.2891
ACSBG1	Long-chain-fatty-acid--CoA ligase ACSBG1	F5H4U6;Q96GR2	24.1991	23.3328	24.2214	24.0336	23.9899		-0.866308	0.480623		0.022344	0.987311		-0.165534	0.772115		-0.20918	0.557146		0.888652	0.349361		0.700775	0.544007		0.657128	0.411503		0.285262		23.9495	24.3239	24.3239	22.9089	23.33	23.7594	24.5404	24.3443	23.7796	23.9495	23.8481	24.3031	23.976	23.9495	24.0443
ACSL1	Long-chain-fatty-acid--CoA ligase 1	E7EPM6;P33121;B7Z452;P33121-2;B7Z3Z9	25.6868	25.6052	25.7684	25.5827	25.4073		-0.0815792	0.615307		0.0816123	0.842582		-0.104119	0.735564		-0.2795	0.472614		0.163191	0.420899		-0.0225398	0.944342		-0.19792	0.476485		0.322433		25.6153	25.772	25.673	25.5754	25.5725	25.6676	25.9111	25.7129	25.6811	25.4073	25.6703	25.6703	25.2354	25.5955	25.391
ACSL4	Long-chain-fatty-acid--CoA ligase 4	O60488-2;O60488	28.3381	28.3082	28.5937	28.4429	28.4274		-0.0298818	0.931843		0.255594	0.742975		0.104829	0.782712		0.0893097	0.723429		0.285475	0.349525		0.13471	0.795921		0.119191	0.698091		0.508886		28.3745	28.4274	28.2123	28.391	28.1263	28.4073	28.524	28.5573	28.6998	28.2979	28.3578	28.673	28.2759	28.524	28.4823
ACSL5	Long-chain-fatty-acid--CoA ligase 5	Q9ULC5;Q9ULC5-3;B4DX30;Q9ULC5-4	24.0816	24.5076	24.7302	24.9441	25.4064		0.425919	0.740231		0.648549	0.803898		0.862507	0.613341		1.32472	0.438323		0.22263	0.847479		0.436588	0.704844		0.898805	0.415319		0.32313		23.5889	24.824	23.832	23.8761	24.7796	24.867	25.2499	24.3031	24.6376	24.7077	25.239	24.8858	25.5045	25.6012	25.1135
ACSS1	Acetyl-coenzyme A synthetase 2-like, mitochondrial;Acetyl-coenzyme A synthetase	Q9NUB1-2;Q9NUB1;Q6ZV30;F5H6F4;F8W7Y1;E9PC79	24.6822	25.854	25.8196	26.0459	26.1969		1.17181	0.738525		1.13739	0.849224		1.36371	0.741916		1.51471	0.654453		-0.0344213	0.939809		0.191893	0.707364		0.342894	0.470614		0.678483		22.0064	26.019	26.0211	25.6181	26.0793	25.8647	25.9043	25.6757	25.8788	26.0608	25.8973	26.1795	26.3359	26.3031	25.9517
ACSS2	Acetyl-coenzyme A synthetase, cytoplasmic	F6WZD5;Q9NR19;Q5QPH3;E7EWU3;B3KUV2	26.7001	26.6216	26.6531	26.6361	26.5347		-0.0785586	0.852438		-0.0470753	0.949046		-0.064045	0.929886		-0.165449	0.743415		0.0314833	0.877022		0.0145137	0.981521		-0.0868899	0.820041		0.941292		26.4815	26.632	26.9869	26.533	26.632	26.6998	26.7518	26.632	26.5754	26.317	26.7771	26.8142	26.3728	26.8142	26.417
ACTA1	Actin, alpha cardiac muscle 1;Actin, gamma-enteric smooth muscle;Actin, aortic smooth muscle;Actin, alpha skeletal muscle	P68032;P63267;P62736;P68133;F5H1C1;Q5T8M8;A6NL76;B4DUI8;Q5T8M7;E9PG30;E7EQV5	34.1053	34.7991	34.6623	34.106	33.8748		0.693783	0.48483		0.556962	0.80123		0.000723521	0.998859		-0.230461	0.672371		-0.13682	0.766027		-0.693059	0.575672		-0.924244	0.258462		0.282742		34.3828	34.1679	33.7653	34.6253	35.0673	34.7047	34.8974	34.6253	34.4642	34.7099	33.7849	33.8233	33.8233	33.6944	34.1068
ACTB	Actin, cytoplasmic 1;Actin, cytoplasmic 1, N-terminally processed	P60709;B4E335;B4DW52	37.5719	37.6075	37.768	37.6869	37.6298		0.035642	0.805021		0.196142	0.808188		0.115054	0.579625		0.0579338	0.453585		0.1605	0.473206		0.0794118	0.682469		0.0222918	0.865168		0.342558		37.5556	37.6116	37.5484	37.5047	37.6589	37.6589	37.834	37.6185	37.8516	37.6321	37.7175	37.7111	37.6253	37.6388	37.6253
ACTBL2	Beta-actin-like protein 2	Q562R1	27.0414	27.1525	27.064	27.3294	27.3988		0.111142	0.894935		0.0226237	0.961142		0.288077	0.711252		0.357451	0.428965		-0.0885188	0.915516		0.176935	0.889718		0.246309	0.733452		0.687676		27.217	26.9202	26.9869	27.4707	27.3828	26.604	27.0608	27.1015	27.0296	26.9202	27.6527	27.4154	27.3745	27.2979	27.524
ACTG1	Actin, cytoplasmic 2;Actin, cytoplasmic 2, N-terminally processed	P63261;F5H0N0;I3L3I4;I3L3I0;I3L1U9	29.8772	30.3761	30.2114	30.3824	30.4173		0.49887	0.615459		0.334253	0.843195		0.50519	0.712301		0.540134	0.564744		-0.164617	0.577221		0.00631968	0.997104		0.0412642	0.888005		0.59409		29.8019	30.4823	29.3473	30.2647	30.362	30.5014	30.3724	30.2535	30.0084	30.0479	30.2759	30.8234	30.6022	30.3088	30.341
ACTL6A	Actin-like protein 6A	O96019-2;O96019;C9JQT2;H7C5S0	23.2088	24.0687	23.9946	23.5003	23.7938		0.85986	0.740376		0.785833	0.843361		0.291509	0.915827		0.584993	0.778045		-0.0740274	0.969183		-0.568351	0.815366		-0.274867	0.859963		0.825072		24.0443	21.5888	23.9933	23.4954	23.49	25.2206	24.317	24.002	23.6649	23.0422	23.2641	24.1946	24.0359	23.4049	23.9406
ACTN1	Alpha-actinin-1	P12814-3	34.1166	34.2973	34.3084	34.3239	34.2826		0.180697	0.540459		0.191833	0.843097		0.207343	0.616262		0.166008	0.470741		0.0111364	0.987251		0.0266457	0.933889		-0.0146891	0.90794		0.736328		34.099	34.2408	34.01	34.2619	34.3892	34.2408	34.6735	34.099	34.1529	34.402	34.1679	34.402	34.3101	34.2549	34.2828
ACTN4	Alpha-actinin-4	O43707;D6PXK4;E7EV83	30.6997	30.9539	30.8525	30.9618	30.7533		0.254264	0.480748		0.152834	0.850321		0.262114	0.612728		0.0536016	0.805218		-0.10143	0.834097		0.00785001	0.984801		-0.200663	0.438293		0.576922		30.5844	30.7613	30.7533	31.0673	30.8829	30.9117	31.1664	30.5754	30.8157	31.08	30.7771	31.0283	30.8309	30.6285	30.8004
ACTR10	Actin-related protein 10	Q9NZ32;F5H5L9	27.1363	26.9565	27.3391	27.4315	26.9914		-0.179855	0.615563		0.20274	0.802104		0.295142	0.645626		-0.144963	0.739352		0.382596	0.383225		0.474998	0.555727		0.0348924	0.953498		0.400741		27.1015	27.2262	27.0813	26.7389	27.019	27.1115	27.5609	27.3153	27.141	27.632	27.1015	27.5609	27.3239	26.7645	26.8858
ACTR1A	Alpha-centractin	P61163;B4DXP9;F5H3I4	30.4663	30.6844	30.556	30.7401	30.6569		0.218154	0.520339		0.0897655	0.830541		0.27382	0.605575		0.190653	0.463444		-0.128389	0.383499		0.0556653	0.892744		-0.0275014	0.788823		0.34867		30.3303	30.5296	30.5389	30.6198	30.6881	30.7453	30.5573	30.6285	30.4823	30.7533	30.5481	30.9188	30.6964	30.6285	30.6458
ACTR1B	Beta-centractin	P42025;G5E9Q5	26.7625	27.0322	26.9435	26.9552	26.8636		0.269677	0.719376		0.18101	0.79135		0.192736	0.633263		0.101119	0.624907		-0.0886669	0.92025		-0.0769405	0.94193		-0.168558	0.81352		0.834321		26.6595	26.8385	26.7895	26.4846	27.2625	27.3494	27.1312	26.8973	26.8019	26.9202	26.8142	27.1312	26.976	26.7645	26.8504
ACTR2	Actin-related protein 2	P61160;E9PF41;G3V1L8;F5H6T1	32.2114	32.3665	32.3428	32.4287	32.4766		0.155073	0.616375		0.13139	0.788145		0.217236	0.612922		0.265186	0.440435		-0.0236829	0.949792		0.062163	0.904795		0.110114	0.662657		0.489312		32.1634	32.1813	32.2897	32.2563	32.5618	32.2814	32.4678	32.3357	32.225	32.3033	32.3542	32.6285	32.4823	32.4581	32.4895
ACTR3	Actin-related protein 3	P61158;B4DXW1;F5H3P5;B4DTI0	33.7327	33.8068	33.8522	33.9097	33.9867		0.0740598	0.842343		0.119456	0.851865		0.177027	0.696398		0.254019	0.513474		0.0453962	0.895084		0.102968	0.75997		0.17996	0.446193		0.567579		33.5062	33.7946	33.8974	33.684	33.9417	33.7946	33.9153	33.9677	33.6735	33.8233	33.8792	34.0266	33.9505	33.9505	34.0592
ACY1	Aminoacylase-1	C9JMV9;C9J6I6;Q03154;C9J9D8;C9JWD4	23.0108	23.5898	23.0542	23.2184	22.6894		0	0		0	0		0	0		0	0		0	0		0	0		0	0		0.815776		23.2502	22.6879	23.0943	22.9411	24.6441	23.184	22.0204	23.6158	23.5266	22.5695	24.1831	22.9026	23.212	21.9753	22.8809
ACYP1	Acylphosphatase;Acylphosphatase-1	G3V2U7;P07311	27.049	26.5554	26.7723	26.664	26.7243		-0.493598	0.47682		-0.276732	0.816438		-0.385047	0.572244		-0.324704	0.596962		0.216866	0.390069		0.108551	0.723749		0.168893	0.761106		0.390439		27.3066	26.9089	26.9316	26.7389	26.4488	26.4785	26.7645	26.8264	26.726	26.673	26.673	26.6458	27.0608	26.3861	26.726
ADAM10	Disintegrin and metalloproteinase domain-containing protein 10	A8MY20;O14672;B4DU28	29.2423	29.3562	29.4458	29.4609	29.7247		0.113913	0.744126		0.203479	0.795682		0.218655	0.657764		0.482445	0.446077		0.0895665	0.709883		0.104742	0.784184		0.368532	0.398968		0.303394		29.0864	29.461	29.1795	29.2625	29.4995	29.3066	29.3196	29.4532	29.5646	29.5754	29.3174	29.49	29.5033	29.8324	29.8385
ADCY6	Adenylate cyclase type 6	O43306-2;O43306	24.3343	24.4787	24.8998	25.0267	25.11		0.144368	0.932046		0.565549	0.816926		0.692433	0.618986		0.775738	0.552633		0.421181	0.687456		0.548065	0.673456		0.63137	0.578868		0.561809		24.2096	25.0275	23.7658	23.7241	25.0148	24.6971	24.4488	25.1293	25.1214	25.0894	24.976	25.0148	24.7441	25.5841	25.002
ADD1	Alpha-adducin	E7EV99;E7ENY0;P35611-2;A2A3N8;P35611;P35611-3;Q86XM2;Q96D30;H0Y9H2	29.5253	29.7063	29.6673	29.6295	29.56		0.181018	0.674934		0.141986	0.83375		0.104226	0.829702		0.0347404	0.914614		-0.0390326	0.906469		-0.0767918	0.886776		-0.146278	0.560931		0.78439		29.5898	29.2913	29.6948	29.8653	29.5407	29.7129	29.7549	29.5389	29.708	29.5518	29.4804	29.8564	29.5808	29.6093	29.49
ADD3	Gamma-adducin	Q9UEY8-2;Q9UEY8	28.2559	28.5294	28.3907	28.1792	28.3669		0.273436	0.478885		0.134808	0.819382		-0.0767523	0.741466		0.110954	0.706902		-0.138627	0.596231		-0.350188	0.513974		-0.162482	0.60433		0.348069		28.1604	28.258	28.3494	28.4938	28.6629	28.4314	28.3282	28.5682	28.2759	28.2123	28.0762	28.249	28.5609	28.203	28.3367
ADH5	Alcohol dehydrogenase class-3	P11766	30.2887	30.3857	30.2882	30.4354	30.3499		0.0970427	0.794838		-0.000436783	0.999017		0.146721	0.775606		0.0612138	0.863391		-0.0974795	0.51753		0.0496782	0.903835		-0.0358289	0.796677		0.823706		30.0217	30.362	30.4823	30.4334	30.3828	30.341	30.4032	30.2193	30.2422	30.5296	30.2193	30.5573	30.3515	30.2647	30.4334
ADK	Adenosine kinase	B7Z800;P55263-2;P55263;P55263-3	26.8827	26.7091	26.8195	27.1399	26.8194		-0.173574	0.689627		-0.0631841	0.938718		0.25721	0.570242		-0.063249	0.833568		0.11039	0.854585		0.430784	0.537728		0.110325	0.799619		0.471201		26.976	26.7518	26.9202	26.7645	26.4425	26.9202	27.1312	26.7518	26.5754	27.1984	27.0608	27.1604	26.9428	26.8973	26.6181
ADO	2-aminoethanethiol dioxygenase	Q96SZ5	24.0676	23.3958	23.3499	22.6532	23.7626		-0.671795	0.709463		-0.71775	0.761973		-1.41447	0.621937		-0.305045	0.740676		-0.045955	0.981838		-0.742671	0.82392		0.36675	0.825205		0.5688		24.5105	24.0275	23.6649	23.8481	22.2142	24.1253	23.2259	23.3503	23.4735	23.6649	22.9603	21.3343	23.6211	24.3059	23.3608
ADPGK	ADP-dependent glucokinase	Q9BRR6-2;Q9BRR6;H3BRS6;E7EQY8	23.6503	23.373	22.9344	23.8478	24.0756		-0.277315	0.931088		-0.715834	0.807287		0.197547	0.95048		0.42528	0.789128		-0.438519	0.862085		0.474862	0.910996		0.702595	0.770113		0.823067		22.652	24.0526	24.2463	24.1841	21.6316	24.3031	23.0247	23.187	22.5916	23.3654	22.8168	25.3612	24.4105	24.4923	23.3238
ADPRH	[Protein ADP-ribosylarginine] hydrolase	P54922	27.1815	26.5724	27.1602	27.2152	26.9433		-0.609095	0.544169		-0.0212339	0.987572		0.0336787	0.972602		-0.238185	0.818457		0.587861	0.209788		0.642773	0.480098		0.370909	0.673545		0.487125		27.3662	26.6998	27.4785	26.8019	26.4138	26.5014	27.1795	27.1312	27.17	27.3745	27.1795	27.0914	26.8385	27.5536	26.4378
ADRBK1	Beta-adrenergic receptor kinase 1	P25098;E9PRV7	27.6735	27.4525	27.607	27.6514	27.6915		-0.221011	0.654141		-0.0664965	0.930402		-0.0220782	0.973021		0.0180683	0.971077		0.154514	0.309794		0.198933	0.497244		0.239079	0.381071		0.614471		28.003	27.4785	27.5389	27.4473	27.4707	27.4394	27.5609	27.5536	27.7064	27.5682	27.673	27.7129	27.6181	27.8385	27.6181
ADRM1	Proteasomal ubiquitin receptor ADRM1	Q16186;E9PEC0	25.7789	25.1462	25.8947	25.4549	25.2902		-0.632716	0.476945		0.115844	0.881475		-0.324031	0.656435		-0.488741	0.47363		0.74856	0.110591		0.308685	0.530828		0.143975	0.609339		0.170787		26.1546	25.5696	25.6125	25.002	25.1795	25.2571	25.9361	25.8741	25.8741	25.417	25.3578	25.5898	25.4298	25.141	25.2996
ADSL	Adenylosuccinate lyase	P30566;E7ERF4;P30566-2;B4DUM2	28.785	28.609	28.6611	28.5116	28.5443		-0.175994	0.674914		-0.123899	0.846652		-0.273492	0.59752		-0.240787	0.474475		0.0520954	0.92305		-0.0974973	0.870655		-0.0647926	0.870035		0.635181		28.8682	28.6697	28.8173	28.7864	28.341	28.6998	28.7357	28.8203	28.4274	28.6285	28.3452	28.5609	28.4354	28.6998	28.4976
ADSS	Adenylosuccinate synthetase isozyme 2	F8W9D6;P30520	25.2361	25.8116	25.6438	25.531	25.5643		0.575504	0.479462		0.407695	0.826068		0.29487	0.645515		0.328208	0.536266		-0.167809	0.51023		-0.280633	0.53378		-0.247296	0.441053		0.276994		25.4138	25.3811	24.9134	25.9134	25.6403	25.8811	25.5667	25.772	25.5926	25.5105	25.6431	25.4394	25.5344	25.6971	25.4614
AFAP1	Actin filament-associated protein 1	Q8N556;E9PDT7	24.9806	25.8196	25.2656	24.9404	25.3113		0.838993	0.799333		0.285055	0.967736		-0.040137	0.99045		0.330711	0.916174		-0.553938	0.688762		-0.87913	0.642809		-0.508282	0.690839		0.928535		22.6012	25.8361	26.5045	25.9584	26.317	25.1833	25.4073	26.0317	24.3578	24.9134	25.7208	24.1871	25.3975	25.9043	24.632
AFTPH	Aftiphilin	Q6ULP2-5;Q6ULP2-2;Q6ULP2-4;Q6ULP2;B8ZZI9;Q6ULP2-3	24.0639	24.5418	23.4051	23.8385	23.3313		0.477901	0.495087		-0.658873	0.832427		-0.225393	0.838912		-0.732663	0.676384		-1.13677	0.457714		-0.703294	0.585387		-1.21056	0.494554		0.618422		23.8481	24.1642	24.1795	24.6865	24.3578	24.5812	24.2244	23.7796	22.2112	24.1332	24.275	23.1074	23.7389	24.2821	21.9728
AGAP2	Arf-GAP with GTPase, ANK repeat and PH domain-containing protein 2	Q99490-2;F8VVT9;Q99490	25.3057	24.9231	25.3517	25.1404	25.1136		-0.382636	0.620556		0.0459232	0.970394		-0.16535	0.774509		-0.192158	0.721672		0.42856	0.531987		0.217286	0.796044		0.190478	0.769842		0.662021		25.5404	25.019	25.3578	25.3239	24.8528	24.5926	25.0148	25.3511	25.6891	25.2571	25.228	24.9361	24.8717	25.3877	25.0813
AGFG1	Arf-GAP domain and FG repeat-containing protein 1	F5GYJ2;P52594-2;P52594-3;P52594;E9PHX7;B8ZZY2;C9J2I0	25.7684	25.6256	25.8728	25.7358	25.4207		-0.142782	0.82634		0.104439	0.919974		-0.0325743	0.971865		-0.347631	0.558295		0.247221	0.542873		0.110208	0.864096		-0.204849	0.54548		0.527948		25.5225	26.1871	25.5955	25.8741	25.433	25.5696	25.8166	25.7103	26.0914	25.4984	25.8997	25.8093	25.4551	25.4425	25.3645
AGL	Glycogen debranching enzyme;4-alpha-glucanotransferase;Amylo-alpha-1,6-glucosidase	P35573;P35573-2;P35573-3	28.661	28.6415	28.9808	28.7399	28.8211		-0.019481	0.953628		0.319802	0.691571		0.0789242	0.771171		0.160133	0.553349		0.339283	0.311578		0.0984052	0.803706		0.179614	0.549388		0.323218		28.6964	28.7292	28.5573	28.805	28.5014	28.6181	29.0111	28.8474	29.0839	28.8712	28.6389	28.7096	28.8712	28.9259	28.6663
AGO2	Protein argonaute-2	Q9UKV8;Q9UKV8-2	25.7422	23.4477	25.5347	25.6098	25.3077		-2.29447	0.379039		-0.207453	0.813665		-0.132349	0.732915		-0.434446	0.645829		2.08701	0.186802		2.16212	0.514102		1.86002	0.324848		0.12445		25.5898	25.6784	25.9584	24.0754	23.3391	22.9287	25.5955	25.4362	25.5725	25.7077	25.5609	25.5609	25.5463	25.7619	24.615
AGPS	Alkyldihydroxyacetonephosphate synthase, peroxisomal	O00116;F5H632	26.8634	26.6788	26.8912	27.0051	26.9173		-0.184619	0.73019		0.0278473	0.980348		0.141753	0.824525		0.0538921	0.924163		0.212467	0.374816		0.326372	0.547159		0.238511	0.462677		0.647085		26.4999	26.9202	27.17	26.8142	26.604	26.6181	26.9977	26.8019	26.8741	27.17	26.8264	27.019	26.7389	27.0813	26.9316
AGT	Angiotensinogen;Angiotensin-1;Angiotensin-2;Angiotensin-3;Angiotensin-4;Angiotensin 1-9;Angiotensin 1-7;Angiotensin 1-5;Angiotensin 1-4	P01019	25.5039	25.2181	25.239	24.2445	25.0777		-0.285837	0.787757		-0.26495	0.879561		-1.25949	0.72097		-0.426212	0.67617		0.0208867	0.982364		-0.973653	0.795932		-0.140375	0.816761		0.702569		26.2058	25.317	24.989	24.9933	25.1565	25.5045	25.391	24.7945	25.5315	25.141	22.1883	25.4041	25.3205	24.7182	25.1946
AHCY	Adenosylhomocysteinase	P23526;F5H737	28.3597	28.7348	28.3743	28.5286	28.6618		0.375006	0.461172		0.0145149	0.984034		0.168863	0.615326		0.302025	0.432906		-0.360491	0.336337		-0.206143	0.542484		-0.0729802	0.744487		0.241159		28.4154	28.4194	28.2445	28.7927	28.6004	28.8112	28.5682	28.1842	28.3704	28.6251	28.4823	28.4785	28.7581	28.5609	28.6663
AHCYL2	Putative adenosylhomocysteinase 3;Adenosylhomocysteinase	Q96HN2-2;H0Y8B3;F8W7N8;D7UEQ7;Q96HN2-3;D9N155	29.1035	29.0551	29.1783	29.1931	29.1074		-0.0483507	0.931519		0.0748526	0.912133		0.0895863	0.88515		0.0039463	0.988291		0.123203	0.763292		0.137937	0.861071		0.052297	0.881118		0.950505		29.3174	28.8741	29.1189	29.2123	28.7927	29.1604	29.2399	28.9841	29.3109	29.3557	28.8593	29.3641	29.104	29.1913	29.027
AHSA1	Activator of 90 kDa heat shock protein ATPase homolog 1	O95433;G3V438;B4DUR9;H0YJG7;H0YJ63	27.3353	27.7478	27.2823	27.7441	27.4066		0.412471	0.521216		-0.0530313	0.927541		0.408841	0.617565		0.0712554	0.879744		-0.465502	0.269782		-0.00363032	0.999651		-0.341216	0.479438		0.358628		27.5389	27.3066	27.1604	27.7581	27.9316	27.5536	27.2077	27.2077	27.4314	27.8142	27.3992	28.019	27.632	27.1015	27.4862
AHSG	Alpha-2-HS-glycoprotein;Alpha-2-HS-glycoprotein chain A;Alpha-2-HS-glycoprotein chain B	C9JV77;F5H0Q5;P02765	27.1822	27.5259	27.3542	27.0689	27.2433		0.343737	0.468781		0.172075	0.814236		-0.113243	0.885478		0.0611134	0.933614		-0.171662	0.537284		-0.45698	0.629926		-0.282624	0.706239		0.691948		27.1604	27.1507	27.2354	27.5969	27.5898	27.391	27.4629	27.1604	27.4394	26.9316	26.6998	27.5754	26.7389	27.7195	27.2714
AIDA	Axin interactor, dorsalization-associated protein	F5H715;Q96BJ3;Q96BJ3-2	23.6446	23.2393	23.4006	22.6818	23.114		-0.405314	0.814074		-0.244004	0.863351		-0.962791	0.58954		-0.530624	0.548878		0.16131	0.938885		-0.557477	0.815982		-0.12531	0.946879		0.655774		23.8481	23.7895	23.2961	24.0275	23.6971	21.9932	23.2416	23.9584	23.0018	22.9587	22.3032	22.7835	23.391	23.3236	22.6273
AIFM1	Apoptosis-inducing factor 1, mitochondrial	O95831-3;O95831;O95831-2	26.0071	26.456	26.0009	26.4642	26.041		0.448869	0.606689		-0.00621796	0.99598		0.457023	0.589952		0.0338682	0.94149		-0.455087	0.564033		0.00815392	0.994997		-0.415001	0.537356		0.480142		26.2767	25.9134	25.8312	26.3205	26.9202	26.1273	25.8858	25.654	26.4629	26.5285	26.5045	26.3595	26.2714	25.945	25.9066
AIMP1	Aminoacyl tRNA synthase complex-interacting multifunctional protein 1;Endothelial monocyte-activating polypeptide 2	Q12904;Q12904-2;B4DNK3	27.5056	27.7015	27.5755	27.7325	27.7558		0.195929	0.548517		0.0699177	0.889781		0.226873	0.621455		0.250169	0.495924		-0.126012	0.537982		0.0309436	0.91819		0.0542399	0.737927		0.447051		27.3239	27.632	27.5609	27.6527	27.7195	27.7325	27.6181	27.4154	27.6931	27.5898	27.7453	27.8623	27.8203	27.6389	27.8081
AIMP2	Aminoacyl tRNA synthase complex-interacting multifunctional protein 2	A8MU58;F8W950;Q13155	25.8936	25.9513	26.2998	25.8594	25.7124		0.0577068	0.940805		0.406181	0.803443		-0.0342159	0.973698		-0.181283	0.81197		0.348475	0.434306		-0.0919228	0.858578		-0.23899	0.618597		0.519584		25.7024	25.604	26.3745	25.9606	25.8409	26.0526	26.0793	26.2021	26.6181	25.7645	25.7103	26.1035	25.4138	25.6811	26.0422
AIP	AH receptor-interacting protein	O00170;E9PPD7;E9PMH2	26.8893	27.0909	27.0689	27.0875	27.0425		0.201588	0.762974		0.179544	0.889092		0.198133	0.789507		0.153196	0.841041		-0.0220445	0.971555		-0.00345484	0.994449		-0.0483926	0.9276		0.946105		27.2262	26.4122	27.0296	27.0505	27.2354	26.9869	26.6998	27.0914	27.4154	26.9539	27.0914	27.217	27.0401	26.7129	27.3745
AK1	Adenylate kinase isoenzyme 1	Q5T9B7;P00568;H0Y4J6	30.5284	30.3767	30.6417	30.532	30.632		-0.151714	0.730136		0.113259	0.848491		0.00363541	0.989602		0.103547	0.781498		0.264973	0.487977		0.155349	0.74218		0.25526	0.555184		0.623762		30.393	30.4629	30.7292	30.2535	30.2308	30.6458	30.4919	30.6798	30.7533	30.4919	30.5109	30.5934	30.4334	30.6544	30.8081
AK2	Adenylate kinase 2, mitochondrial;Adenylate kinase 2, mitochondrial;Adenylate kinase 2, mitochondrial, N-terminally processed	F8W1A4;P54819-2;P54819;P54819-5;P54819-6;E7EWH4;P54819-3;F8VZG5;F8VY04;P54819-4;G3V213	29.2513	29.4145	29.4579	29.3747	29.4562		0.163193	0.611118		0.206644	0.820155		0.123462	0.731125		0.204901	0.588917		0.0434507	0.562852		-0.0397313	0.84825		0.0417074	0.876758		0.561823		29.3325	29.0531	29.3683	29.4174	29.4453	29.3807	29.509	29.4234	29.4413	29.4688	29.2913	29.3641	29.5682	29.5536	29.2467
AK3	GTP:AMP phosphotransferase AK3, mitochondrial	Q9UIJ7;E7ET30;Q9UIJ7-2	27.6024	27.6496	27.8204	28.2565	28.2027		0.0471395	0.952792		0.217947	0.825647		0.654111	0.585641		0.600267	0.556381		0.170808	0.65016		0.606971	0.53243		0.553127	0.527197		0.370452		27.2803	27.5898	27.9372	27.524	27.9539	27.4707	27.8019	27.9202	27.7389	28.3066	28.0557	28.4073	28.5014	28.524	27.5826
AKAP10	A-kinase anchor protein 10, mitochondrial	O43572;E7EMD6	23.5184	22.5109	24.1192	23.7469	23.1544		-1.00754	0.668388		0.600838	0.792814		0.228452	0.885431		-0.364023	0.810387		1.60837	0.403366		1.23599	0.663773		0.643512	0.770997		0.518661		23.8858	22.7837	23.8858	21.057	23.1311	23.3445	23.8764	24.0772	24.4041	23.3645	23.3239	24.5522	22.6566	24.1095	22.697
AKR1A1	Alcohol dehydrogenase [NADP(+)]	P14550;Q5T621	29.0115	28.5864	28.8596	29.0338	29.0499		-0.42506	0.500839		-0.151838	0.826965		0.0222956	0.963808		0.0384127	0.943126		0.273222	0.506992		0.447355	0.533907		0.463472	0.464385		0.471403		29.1189	28.9259	28.9896	28.8142	28.4938	28.4512	29.114	28.7357	28.7292	29.2625	28.8385	29.0004	29.4433	28.9869	28.7195
AKR1B1	Aldose reductase	P15121;E9PCX2	28.8737	28.869	28.8569	28.8175	28.8132		-0.00466728	0.997779		-0.0167573	0.985742		-0.0562242	0.920122		-0.0604909	0.879494		-0.01209	0.980278		-0.0515569	0.895079		-0.0558236	0.797048		0.993268		28.9231	28.579	29.1189	28.9677	28.9231	28.7162	29.0164	28.9539	28.6004	28.9259	28.8534	28.673	28.8324	28.7389	28.8682
AKR7A2	Aflatoxin B1 aldehyde reductase member 2	O43488;H3BLU7	30.3476	30.3874	30.6728	30.533	30.4658		0.0398591	0.952518		0.325206	0.799523		0.185424	0.770835		0.118237	0.83697		0.285347	0.413926		0.145564	0.738271		0.0783774	0.85521		0.665395		30.7129	30.099	30.2308	30.5296	30.2193	30.4134	30.8608	30.5203	30.6372	30.7129	30.4727	30.4134	30.1842	30.6198	30.5934
AKT1	RAC-alpha serine/threonine-protein kinase	P31749;B7Z5R1	25.9575	25.7028	26.3955	26.1198	25.9944		-0.254738	0.761819		0.437942	0.795784		0.162303	0.863972		0.0369212	0.964896		0.69268	0.233673		0.417042	0.592873		0.29166	0.582469		0.47068		26.4754	25.5045	25.8927	25.7746	25.391	25.9428	26.3066	26.4122	26.4676	25.8215	26.3795	26.1585	25.7543	26.2335	25.9955
AKT2	RAC-beta serine/threonine-protein kinase	P31751;B3KP61;Q0VAN0;C9K000	27.2402	27.2003	27.2562	27.1228	27.0661		-0.0399024	0.932138		0.0159931	0.971356		-0.117418	0.804379		-0.174118	0.569777		0.0558955	0.87733		-0.0775153	0.911512		-0.134216	0.730592		0.793508		27.1984	27.1312	27.391	27.3578	26.9539	27.2891	27.217	27.2625	27.2891	26.8264	27.2354	27.3066	27.1795	27.1214	26.8973
AKT3	RAC-gamma serine/threonine-protein kinase	Q9Y243-2;Q9Y243	24.5355	23.833	23.672	23.9376	23.6057		-0.702418	0.675063		-0.863468	0.794713		-0.597848	0.662754		-0.929724	0.654778		-0.16105	0.949766		0.10457	0.968527		-0.227306	0.933054		0.857628		24.4041	24.5105	24.6918	23.1002	23.4098	24.989	23.976	24.417	22.623	24.1719	24.4676	23.1733	24.9089	23.8155	22.0928
ALAD	Delta-aminolevulinic acid dehydratase	P13716;P13716-2	30.563	30.6582	30.6989	30.7069	30.7669		0.0952555	0.731056		0.135902	0.817151		0.143926	0.778653		0.203899	0.532961		0.0406462	0.911303		0.0486705	0.943106		0.108643	0.769366		0.835141		30.5664	30.6022	30.5203	30.8534	30.5014	30.6198	30.8157	30.5844	30.6964	30.6458	30.4532	31.0217	30.8459	30.5573	30.8973
ALDH16A1	Aldehyde dehydrogenase family 16 member A1	Q8IZ83;Q8IZ83-3;F8WBH3;F5H4B6	28.9408	29.2913	29.2738	29.5272	29.435		0.350455	0.548166		0.332965	0.838108		0.586424	0.573195		0.494178	0.431429		-0.0174904	0.965953		0.235969	0.683031		0.143723	0.698199		0.286836		28.6865	28.995	29.141	29.4334	29.0453	29.3951	29.3325	29.2399	29.249	29.4154	29.3971	29.7692	29.4785	29.2913	29.5352
ALDH1A1	Retinal dehydrogenase 1	P00352;H0Y4S2	27.2541	27.1711	27.555	27.3561	27.4065		-0.08299	0.924649		0.300951	0.804332		0.102023	0.90826		0.152429	0.779166		0.383941	0.409707		0.185013	0.850691		0.235419	0.60123		0.694568		27.2445	26.8858	27.632	27.4551	26.8504	27.2077	27.5826	27.4785	27.604	27.3153	27.0401	27.7129	27.4551	27.4234	27.341
ALDH4A1	Delta-1-pyrroline-5-carboxylate dehydrogenase, mitochondrial	D2D4A3;P30038;P30038-2	24.4943	24.7535	24.3989	24.6519	25.0268		0.25919	0.855923		-0.0954399	0.88509		0.157544	0.734979		0.532519	0.597438		-0.35463	0.783551		-0.101646	0.958652		0.273329	0.863407		0.755153		24.6865	24.2096	24.5869	24.48	25.7364	24.0441	24.317	24.3511	24.5285	24.6971	24.632	24.6264	24.5105	25.7077	24.8623
ALDH9A1	4-trimethylaminobutyraldehyde dehydrogenase	P49189;B4DXY7	26.8168	26.996	27.1096	27.1027	27.0289		0.17915	0.661172		0.292749	0.671034		0.285915	0.70595		0.212038	0.475812		0.113599	0.739978		0.106766	0.909502		0.0328884	0.937542		0.691133		26.8973	26.8142	26.7389	26.7895	26.9539	27.2445	27.0296	27.0914	27.2077	26.6865	27.4234	27.1984	26.9202	26.9869	27.1795
ALDOA	Fructose-bisphosphate aldolase A;Fructose-bisphosphate aldolase	P04075;H3BQN4;H3BPS8;H3BUH7;H3BR04	34.1708	34.5524	34.2951	34.404	34.4656		0.381583	0.498413		0.124283	0.831055		0.233192	0.576205		0.2948	0.457885		-0.2573	0.37299		-0.14839	0.580858		-0.0867831	0.762443		0.281564		34.0832	34.3303	34.099	34.4823	34.7047	34.4702	34.4396	34.2193	34.2265	34.4209	34.402	34.3892	34.5238	34.3033	34.5698
ALDOC	Fructose-bisphosphate aldolase C;Fructose-bisphosphate aldolase	P09972;B7Z1N6;B7Z3K7;A8MVZ9	27.6486	28.0148	27.7925	28.0502	27.95		0.366235	0.542588		0.14389	0.84907		0.401613	0.613136		0.301357	0.522349		-0.222345	0.596653		0.0353781	0.964435		-0.0648785	0.881534		0.523728		27.4551	27.7453	27.7453	28.17	27.7581	28.1164	27.5898	27.7581	28.0296	27.7833	28.0137	28.3536	27.9202	27.7645	28.1652
ALOX12	Arachidonate 12-lipoxygenase, 12S-type	P18054	32.254	32.4312	32.4948	32.5907	32.5134		0.177205	0.702994		0.240874	0.788192		0.336711	0.621194		0.25944	0.581771		0.0636686	0.726215		0.159505	0.629994		0.0822347	0.760499		0.503563		32.0609	32.5618	32.1392	32.4654	32.3196	32.5085	32.5911	32.4775	32.4159	32.6372	32.4384	32.6964	32.6501	32.3489	32.5412
AMDHD2	Putative N-acetylglucosamine-6-phosphate deacetylase	Q9Y303;Q9Y303-2;Q9Y303-3;H3BTZ6;H3BSV9	25.2493	26.208	25.7922	23.2416	25.2748		0.958776	0.722492		0.542913	0.895704		-2.00763	0.72606		0.0255254	0.990212		-0.415862	0.325542		-2.9664	0.581855		-0.93325	0.463122		0.492713		26.6998	23.2811	25.767	26.2607	26.2244	26.1391	25.7543	26.0526	25.5696	26.0588	21.2127	22.4535	25.5926	25.9066	24.3252
AMPD2	AMP deaminase 2	H0Y360;Q01433;Q01433-2;E9PNG0;Q01433-3;Q01433-4	30.4547	30.5569	30.4572	30.4781	30.4801		0.102203	0.79387		0.00253359	0.996434		0.0233917	0.952692		0.0253588	0.938293		-0.0996691	0.714329		-0.078811	0.841386		-0.0768439	0.784772		0.929137		30.5109	30.611	30.2422	30.6458	30.6629	30.362	30.4032	30.393	30.5754	30.4032	30.5296	30.5014	30.4234	30.5934	30.4234
ANGPT1	Angiopoietin-1	Q15389;E7ERK4;B4DTQ9	27.2918	27.4776	26.9277	26.8649	26.828		0.185837	0.789284		-0.36406	0.821788		-0.42688	0.654965		-0.46377	0.502966		-0.549897	0.443075		-0.612717	0.557318		-0.649607	0.374648		0.38939		27.0711	27.673	27.1312	27.1214	27.6865	27.6251	26.7389	26.6865	27.3578	26.5255	27.1604	26.9089	26.8623	26.6458	26.976
ANK1	Ankyrin-1	P16157-10;P16157-8;P16157-5;P16157-16;P16157-3;P16157;P16157-12;P16157-14;P16157-11;P16157-9;P16157-6;P16157-7;P16157-4;P16157-13;P16157-15;P16157-21;E7EVX7;P16157-2	29.3891	29.4774	29.506	29.5565	29.483		0.0883013	0.943676		0.116953	0.940131		0.16746	0.885308		0.093888	0.920425		0.0286516	0.965796		0.0791588	0.933215		0.00558662	0.992408		0.991247		28.7227	29.8872	29.5573	29.7818	29.1115	29.5389	29.6475	29.3787	29.4919	29.7211	29.1984	29.7502	29.6697	29.2422	29.5371
ANKFY1	Rabankyrin-5	I3L2C5;Q9P2R3;Q9P2R3-2;Q9P2R3-4;F5H754	26.8332	26.6843	26.6736	26.8541	26.8092		-0.148978	0.662456		-0.159645	0.80299		0.0208289	0.968768		-0.0240186	0.920904		-0.0106672	0.983952		0.169807	0.784658		0.124959	0.723877		0.753622		26.8264	26.7645	26.9089	26.7389	26.4754	26.8385	26.8142	26.7389	26.4676	26.9428	26.5898	27.0296	26.8142	26.9539	26.6595
ANKMY2	Ankyrin repeat and MYND domain-containing protein 2	Q8IV38;G3V0G5	25.3799	25.9052	25.5299	25.434	25.7681		0.525346	0.482306		0.150001	0.847427		0.0541636	0.944053		0.388228	0.550729		-0.375345	0.218449		-0.471183	0.551695		-0.137118	0.73957		0.338042		25.4362	25.6181	25.0854	25.8264	25.8788	26.0105	25.5463	25.4394	25.604	25.3811	25.1795	25.7415	25.8288	25.48	25.9955
ANKRD13A	Ankyrin repeat domain-containing protein 13A	Q8IZ07;H0YIN8	25.5911	25.4394	25.8898	25.5901	25.7589		-0.151745	0.734991		0.298638	0.790745		-0.00106875	0.997216		0.167747	0.756723		0.450383	0.387452		0.150676	0.815891		0.319492	0.558366		0.575995		25.8336	25.4202	25.5195	25.4738	25.2207	25.6237	25.6096	26.1623	25.8973	25.3239	25.6971	25.7492	25.433	26.0691	25.7746
ANKRD28	Serine/threonine-protein phosphatase 6 regulatory ankyrin repeat subunit A	O15084-4;O15084;O15084-1;O15084-2;B4DIW9	26.4652	26.7771	26.7239	26.5861	26.8185		0.311865	0.615902		0.258699	0.810075		0.120881	0.789795		0.353323	0.498355		-0.0531667	0.916878		-0.190985	0.761198		0.0414575	0.927333		0.509673		26.5359	26.6595	26.2002	27.0401	26.4892	26.8019	26.7518	26.6181	26.8019	26.4425	26.5898	26.726	26.8019	26.9539	26.6998
ANKS1A	Ankyrin repeat and SAM domain-containing protein 1A	Q92625;Q05CP0	26.1298	26.3107	26.2279	25.9258	26.1494		0.180885	0.750226		0.0981534	0.929672		-0.204011	0.800286		0.0196107	0.943419		-0.0827312	0.928166		-0.384896	0.734893		-0.161274	0.761975		0.813936		25.9584	26.1757	26.2553	26.2372	26.6865	26.0084	26.6181	26.2589	25.8069	25.5492	25.7746	26.4536	26.1095	26.0691	26.2696
ANO6	Anoctamin-6	E9PB30;Q4KMQ2;Q4KMQ2-2;E9PCT2	27.2124	27.5083	27.3545	27.5043	27.7703		0.295914	0.736698		0.142135	0.920761		0.291907	0.778817		0.557916	0.561738		-0.153779	0.256532		-0.00400734	0.987098		0.262002	0.381965		0.51594		27.5315	27.5609	26.5448	27.4629	27.4938	27.5682	27.3066	27.3578	27.3992	27.4234	27.611	27.4785	27.7064	27.9316	27.673
ANP32B	Acidic leucine-rich nuclear phosphoprotein 32 family member B	Q92688-2;Q92688;Q5T6W8	23.4995	23.6971	23.4158	24.7661	24.5845		0	0		-0.0836684	0.983625		1.26661	0.592386		1.085	0.460519		-0.28127	0.857683		1.06901	0.148997		0.887398	0.0591133		0.296342		24.1129	22.7483	23.6373	23.6819	23.7097	23.6997	23.2938	24.4425	22.5112	24.6431	24.8909	24.7645	24.604	24.4738	24.6757
ANXA1	Annexin A1;Annexin	P04083;Q5T3N1	26.5523	26.9632	27.2013	27.1657	27.1813		0.410911	0.672128		0.649024	0.821306		0.613434	0.62597		0.629005	0.472951		0.238113	0.824341		0.202524	0.890165		0.218094	0.794616		0.614152		26.7129	26.7645	26.1795	27.141	26.3992	27.3494	27.4629	26.632	27.509	27.0914	26.726	27.6798	27.1604	26.8973	27.4862
ANXA11	Annexin A11	E9PDK5;B4DVE7;P50995	30.2403	30.2221	30.2343	30.3327	30.2857		-0.0181732	0.930348		-0.00598145	0.983585		0.0924034	0.791352		0.0454439	0.791139		0.0121918	0.927648		0.110577	0.790091		0.0636171	0.6628		0.811669		30.1361	30.2759	30.3088	30.196	30.1724	30.2979	30.2077	30.2759	30.2193	30.2077	30.2422	30.5481	30.3515	30.2077	30.2979
ANXA2	Annexin;Annexin A2;Putative annexin A2-like protein	H0YN42;P07355;H0YMM1;H0YKS4;H0YMD0;H0YMU9;P07355-2;A6NMY6;H0YKL9;H0YKZ7;H0YLV6;H0YMT9;H0YKX9;H0YKV8;H0YMW4;H0YM50	24.3079	25.0184	25.5722	25.3684	25.284		0.710487	0.718706		1.26432	0.811987		1.06051	0.659918		0.976072	0.594367		0.553836	0.512037		0.350022	0.77989		0.265586	0.801546		0.509335		23.0179	24.6703	25.2354	25.632	24.8191	24.604	25.8741	25.5255	25.317	25.5926	25.4394	25.0732	25.6292	25.5045	24.7182
ANXA3	Annexin A3;Annexin	P12429;D6RA82	28.6924	28.95	28.921	28.7313	28.8896		0.257602	0.623576		0.228608	0.795999		0.0389379	0.94297		0.19729	0.657346		-0.0289936	0.955471		-0.218664	0.688502		-0.0603116	0.903489		0.675324		28.5014	28.906	28.6697	28.6964	28.9787	29.1747	28.995	28.7357	29.0322	28.7421	28.5573	28.8945	28.8415	28.6865	29.141
ANXA4	Annexin A4;Annexin	P09525;Q6P452;B4DDF9	28.7642	28.6891	28.7891	28.9358	28.8726		-0.0750567	0.873105		0.024936	0.972481		0.171562	0.776647		0.108438	0.792913		0.0999928	0.658597		0.246618	0.654177		0.183495	0.51009		0.718288		28.7518	29.0243	28.5165	28.7421	28.5203	28.805	28.8799	28.7389	28.7486	28.8234	29.21	28.7739	29.0111	28.8142	28.7927
ANXA5	Annexin A5;Annexin	P08758;E7ENQ5;D6RBL5;D6RBE9;E9PHT9	29.6249	29.6099	29.8788	29.6321	29.3985		-0.0150394	0.997149		0.253816	0.938787		0.0071551	0.994021		-0.226422	0.889456		0.268855	0.872199		0.0221945	0.987797		-0.211383	0.858506		0.964552		30.7129	28.8445	29.3174	30.1115	29.7341	28.9841	30.8234	29.5371	29.2759	29.9539	29.5555	29.3869	29.94	29.4413	28.8142
ANXA6	Annexin A6;Annexin	A6NN80;E9PGK1;P08133;B7Z582;E5RK69;E7EMC6	24.2664	23.9391	25.0136	24.0656	24.4225		-0.327249	0.890694		0.747222	0.825716		-0.200801	0.960186		0.156183	0.945403		1.07447	0.448535		0.126448	0.977628		0.483431	0.821359		0.878039		24.6703	25.1095	23.0192	23.1746	23.6494	24.9933	25.0732	24.7543	25.2133	24.8433	22.1777	25.1757	25.1719	23.111	24.9847
ANXA7	Annexin;Annexin A7	B4DT77;B4DHY4;P20073-2;P20073	30.1412	30.2079	30.1818	30.2886	30.3673		0.0667292	0.867774		0.0406513	0.939124		0.147417	0.734828		0.226163	0.52325		-0.0260779	0.942143		0.0806878	0.872886		0.159433	0.574646		0.635594		29.94	30.2077	30.2759	30.0217	30.2193	30.3828	30.1361	30.2979	30.1115	30.341	30.1115	30.4134	30.4629	30.3088	30.3303
AP1B1	AP-1 complex subunit beta-1	Q10567-2;Q10567	30.637	30.7127	30.7156	30.7524	30.7822		0.0757027	0.690991		0.0786082	0.827421		0.115453	0.572612		0.145238	0.449312		0.00290553	0.993625		0.0397504	0.879815		0.0695349	0.677691		0.560817		30.611	30.6285	30.6714	30.6198	30.8385	30.6798	30.6285	30.8385	30.6798	30.7292	30.7047	30.8234	30.8004	30.7771	30.7692
AP1G1	AP-1 complex subunit gamma-1	B3KXW5;O43747;O43747-2;E7EUH1;F5GZV5	29.4503	29.5169	29.5553	29.5697	29.5992		0.0665983	0.79044		0.105003	0.822318		0.119401	0.699684		0.148911	0.564622		0.0384051	0.880172		0.0528024	0.876655		0.0823123	0.746484		0.733591		29.5555	29.3325	29.4629	29.6544	29.4294	29.4668	29.4492	29.5916	29.6251	29.4473	29.6578	29.604	29.4823	29.7309	29.5844
AP1G2	AP-1 complex subunit gamma-like 2	O75843;B4E3E1;Q86V28	26.5277	26.4152	26.2928	26.4715	26.4304		-0.112499	0.674046		-0.234896	0.815499		-0.056132	0.875267		-0.0972538	0.821791		-0.122397	0.720381		0.0563672	0.90862		0.0152454	0.978831		0.79897		26.5898	26.425	26.5682	26.527	26.4614	26.2571	26.1642	26.527	26.1871	26.275	26.4938	26.6458	26.6458	26.5359	26.1095
AP1M1	AP-1 complex subunit mu-1	Q9BXS5;Q9BXS5-2;B4DDG7;E7ENJ6	28.9141	29.1473	29.0572	29.1313	29.025		0.23314	0.486322		0.143084	0.810812		0.217118	0.695663		0.110907	0.637786		-0.0900567	0.597153		-0.0160224	0.908787		-0.122234	0.558156		0.361446		28.8385	28.9923	28.9117	29.1652	29.1652	29.1115	29.2007	28.9869	28.9841	29.17	29.0634	29.1604	28.8712	29.0557	29.1483
AP1S1	AP-1 complex subunit sigma-1A	P61966;H7C1E4;P61966-2	25.828	25.5478	25.9664	25.8887	26.163		-0.280195	0.611335		0.13834	0.846163		0.0607007	0.927626		0.334988	0.561795		0.418535	0.316691		0.340895	0.608584		0.615183	0.380787		0.360707		26.0854	25.7695	25.6292	25.3645	25.7746	25.5045	26.1115	25.9066	25.8811	26.17	25.8504	25.6458	26.4425	25.8881	26.1585
AP1S2	AP-1 complex subunit sigma-2	P56377;A6NH01;H7BZG6;H0Y673;E9PE78;B7Z3M9;B4DSU4	26.8709	27.1815	27.1245	27.2608	27.4208		0.310653	0.731687		0.253652	0.86352		0.389935	0.757469		0.549951	0.56552		-0.0570011	0.876367		0.0792821	0.920963		0.239298	0.383734		0.649568		26.5898	27.5536	26.4692	27.2354	27.1015	27.2077	27.3494	27.0813	26.9428	26.8741	27.2625	27.6458	27.4938	27.2979	27.4707
AP2A1	AP-2 complex subunit alpha-1	O95782-2;O95782	30.0654	30.152	30.2187	30.2589	30.274		0.0866458	0.69741		0.153301	0.804661		0.193493	0.622939		0.208646	0.500229		0.0666555	0.457781		0.106847	0.593148		0.122	0.444789		0.364435		29.9117	30.1483	30.1361	30.1604	30.1842	30.1115	30.2535	30.2422	30.1604	30.1604	30.2647	30.3515	30.3088	30.341	30.1724
AP2A2	AP-2 complex subunit alpha-2	O94973;O94973-2;C9J1S3;O94973-3;E9PJJ7;E7ESQ4	26.6865	26.799	26.7294	26.7687	26.9518		0.112486	0.848465		0.0428963	0.970581		0.0821082	0.900869		0.265243	0.657838		-0.0695896	0.906639		-0.0303777	0.964605		0.152757	0.763909		0.867865		26.5754	27.0401	26.4441	27.0401	26.6181	26.7389	26.5754	26.5624	27.0505	26.7518	26.5566	26.9977	26.9202	26.6998	27.2354
AP2B1	AP-2 complex subunit beta	P63010;P63010-2;Q7Z451;F5GYG9	29.1262	29.0056	29.4671	29.2668	29.2472		-0.120595	0.543017		0.340925	0.428145		0.14056	0.613948		0.120996	0.499993		0.46152	0.115802		0.261155	0.552523		0.24159	0.300428		0.122929		29.0557	29.141	29.1819	28.965	28.9705	29.0813	29.3971	29.5296	29.4746	29.3683	29.1628	29.2692	29.2781	29.2935	29.17
AP2M1	AP-2 complex subunit mu	E9PFW3;Q96CW1-2;Q96CW1;F5H0H0;B4DJB1;C9JJ47	27.9636	27.9939	27.8882	28.068	27.9983		0.03029	0.960582		-0.0754172	0.846427		0.104457	0.772093		0.0347093	0.860214		-0.105707	0.861391		0.0741673	0.924723		0.00441933	0.993549		0.909861		27.8741	28.019	27.9977	28.2535	27.5969	28.1312	27.9869	27.9259	27.7518	27.9146	28.0137	28.2759	27.9977	28.1115	27.8858
AP2S1	AP-2 complex subunit sigma	P53680;P53680-2	27.1379	26.667	27.0167	26.7212	26.8036		-0.470916	0.551012		-0.121191	0.86339		-0.416669	0.571846		-0.334275	0.471377		0.349725	0.564362		0.0542475	0.946986		0.136641	0.822098		0.455694		27.1507	27.2979	26.965	26.9428	26.8264	26.2317	26.7389	27.1604	27.1507	26.5898	26.6998	26.8741	26.9869	26.7645	26.6595
AP3B1	AP-3 complex subunit beta-1	E5RJ68;O00203;F5GXG9;F5H093	28.3795	28.2132	28.4834	28.4101	28.4941		-0.166356	0.627242		0.103877	0.853498		0.0305945	0.927899		0.114617	0.697067		0.270233	0.357739		0.196951	0.552019		0.280973	0.3975		0.428524		28.2123	28.5352	28.391	28.1164	28.1652	28.3578	28.4785	28.6181	28.3536	28.3325	28.4785	28.4194	28.4512	28.3992	28.632
AP3D1	AP-3 complex subunit delta-1	O14617;O14617-5;O14617-4;G5E988;O14617-2;E7EMM2;O14617-3	28.0522	27.9093	28.2519	28.2434	28.229		-0.142884	0.659234		0.1997	0.808551		0.191234	0.618793		0.176781	0.520229		0.342584	0.295284		0.334118	0.484158		0.319665	0.29783		0.239083		27.9923	27.9428	28.2216	27.9089	27.7895	28.0296	28.1937	28.1507	28.4113	28.2625	28.17	28.2979	28.267	28.2077	28.2123
AP3M1	AP-3 complex subunit mu-1	Q9Y2T2	28.1229	27.9804	28.2268	28.3731	28.2591		-0.14256	0.727688		0.103911	0.884845		0.25016	0.59983		0.13623	0.730749		0.246471	0.571697		0.392721	0.538442		0.278791	0.525974		0.504857		27.9484	28.2891	28.1312	28.1361	27.7389	28.066	28.0864	28.0813	28.5128	28.3662	28.362	28.391	28.1459	28.5052	28.1263
AP3S1	AP-3 complex subunit sigma-1	Q92572	26.172	26.5731	26.5589	26.6954	26.5774		0.401097	0.454722		0.386827	0.658376		0.523402	0.642093		0.405345	0.458779		-0.0142701	0.950716		0.122305	0.794797		0.00424767	0.991777		0.267626		26.0254	26.2961	26.1946	26.5045	26.5285	26.6865	26.4692	26.632	26.5754	26.7518	26.8623	26.4723	26.7771	26.3511	26.604
AP4B1	AP-4 complex subunit beta-1;AP complex subunit beta	Q9Y6B7;B1ALD0;B7Z4X3	24.2032	23.9249	24.2623	23.9078	23.1158		-0.278363	0.584008		0.0591075	0.974218		-0.295382	0.778807		-1.08744	0.571115		0.33747	0.691913		-0.0170193	0.989688		-0.809077	0.661703		0.585437		24.48	24.0854	24.0443	24.0691	23.867	23.8385	23.6022	24.8336	24.3511	24.0691	23.3101	24.3443	21.7793	24.217	23.3511
AP4M1	AP-4 complex subunit mu-1	C9IZL5;C9JC87;O00189;H7C0A0;H7BZV3;C9JWL4	23.6541	23.6187	23.4672	23.1617	23.8869		-0.0354112	0.98584		-0.18689	0.919235		-0.492342	0.714787		0.232797	0.828811		-0.151478	0.934145		-0.456931	0.829236		0.268208	0.858917		0.799088		24.3031	23.1961	23.463	24.6757	23.0137	23.1666	23.5638	22.9707	23.867	23.5983	22.8064	23.0805	23.3645	24.1166	24.1795
APAF1	Apoptotic protease-activating factor 1	O14727-4;O14727;C9JLV4;O14727-3;O14727-2;O14727-5	27.1038	26.7953	26.657	26.6899	26.685		-0.308507	0.545926		-0.446811	0.482157		-0.413933	0.518121		-0.418893	0.411187		-0.138304	0.736922		-0.105426	0.859912		-0.110385	0.78498		0.266313		27.1015	27.17	27.0401	27.0401	26.5075	26.8385	26.673	26.7771	26.521	26.6458	26.6595	26.7645	26.7771	26.632	26.6458
APEH	Acylamino-acid-releasing enzyme	C9JIF9;P13798;H7C393;H7C1U0	23.4015	23.5377	23.7098	23.4874	24.7251		0.136227	0.95996		0.308337	0.960022		0.0859566	0.981712		1.32365	0.553377		0.17211	0.952472		-0.0502701	0.990515		1.18742	0.385919		0.803196		23.2251	24.8093	22.1699	23.3763	23.0271	24.2096	24.6486	24.5285	21.9523	24.3511	24.558	21.5531	24.5165	25.1604	24.4984
APLP2	Amyloid-like protein 2	F5GZY0;Q06481-3;H7BXI4;Q06481;Q06481-4;Q06481-2;Q06481-5;F5H845	26.7637	26.6487	26.7611	26.6052	26.5778		-0.115005	0.895889		-0.0025959	0.997314		-0.158471	0.82996		-0.185878	0.810511		0.112409	0.869196		-0.0434666	0.946621		-0.0708733	0.913479		0.943568		27.0401	26.976	26.275	26.509	26.4394	26.9977	26.5359	26.6865	27.0608	26.4846	26.6181	26.7129	26.2463	26.5898	26.8973
APMAP	Adipocyte plasma membrane-associated protein	H0Y512;Q9HDC9-2;Q9HDC9	23.7547	22.7154	24.1784	23.5642	24.9321		-1.03932	0.621581		0.4237	0.87453		-0.190482	0.943829		1.17742	0.580696		1.46302	0.2402		0.848842	0.660832		2.21674	0.335687		0.324804		22.4647	24.4551	24.3443	23.3155	22.6902	22.1405	23.8875	24.4234	24.2244	23.1304	23.0885	24.4738	24.317	25.8811	24.5983
APOA1	Apolipoprotein A-I;Proapolipoprotein A-I;Truncated apolipoprotein A-I	P02647;F8W696	29.9066	30.2279	30.2155	29.9364	30.6194		0.321252	0.74558		0.308856	0.833394		0.0297826	0.96886		0.712732	0.626977		-0.0123959	0.992881		-0.291469	0.801285		0.39148	0.80573		0.718051		29.9677	30.2077	29.5444	30.341	30.7211	29.6216	30.5844	29.7973	30.2647	30.0349	29.877	29.8973	30.2077	31.6964	29.9539
APOA1BP	NAD(P)H-hydrate epimerase	Q8NCW5-2;Q8NCW5;Q5T3I4	27.4557	27.2367	27.6326	27.4853	27.661		-0.218992	0.675469		0.176921	0.82135		0.0295506	0.949978		0.205281	0.711366		0.395913	0.373834		0.248543	0.643151		0.424273	0.478753		0.510041		27.3828	27.2979	27.6865	27.4473	26.965	27.2979	27.5014	27.7645	27.632	27.6251	27.4073	27.4234	27.8081	27.8858	27.2891
APOA2	Apolipoprotein A-II;Proapolipoprotein A-II;Truncated apolipoprotein A-II	P02652	24.5493	24.4525	25.1961	24.3252	24.4403		-0.0968202	0.977547		0.646763	0.854186		-0.224119	0.945251		-0.108982	0.969306		0.743584	0.760251		-0.127299	0.976524		-0.0121619	0.99751		0.943253		25.4645	25.1488	23.0346	24.8481	25.8481	22.6614	25.8044	24.9406	24.8433	25.4892	24.1332	23.3531	23.867	25.867	23.5869
APOA4	Apolipoprotein A-IV	P06727	25.877	26.3898	25.9984	26.5934	26.558		0.512772	0.712221		0.121345	0.935812		0.716405	0.613782		0.680933	0.56249		-0.391427	0.684839		0.203633	0.897998		0.168161	0.892873		0.583587		26.3239	26.0041	25.3031	25.7695	27.1214	26.2785	26.0443	25.7619	26.189	26.2979	26.5285	26.9539	26.2625	27.1507	26.2607
APOB	Apolipoprotein B-100;Apolipoprotein B-48	P04114;F5H109	26.4239	28.0194	28.063	27.8786	28.1098		1.59554	0.667894		1.63913	0.821619		1.4547	0.726031		1.68593	0.626968		0.0435899	0.972436		-0.14084	0.919572		0.0903962	0.960432		0.613436		24.7645	28.9231	25.5841	27.3992	28.5426	28.1164	27.5754	28.3828	28.2308	27.4862	27.9372	28.2123	27.3325	29.0375	27.9595
APOBEC3C	DNA dC->dU-editing enzyme APOBEC-3C	Q9NRW3	24.8098	24.9029	24.3716	24.1845	23.8728		0.0931505	0.921697		-0.438126	0.826313		-0.625303	0.626076		-0.936946	0.442426		-0.531277	0.459021		-0.718453	0.54235		-1.0301	0.168616		0.291918		24.3511	24.7441	25.3342	25.0359	24.7234	24.9495	24.1871	24.019	24.9089	23.8858	24.1332	24.5344	24.0105	23.632	23.976
APOBEC3G	DNA dC->dU-editing enzyme APOBEC-3G	Q9HC16	25.5665	24.2457	26.0797	25.7993	25.6559		-1.32087	0.479388		0.513107	0.750667		0.232736	0.782416		0.0893695	0.899048		1.83397	0.207201		1.5536	0.561745		1.41024	0.39114		0.188976		25.6918	25.5433	25.4645	23.8061	24.0084	24.9225	26.2517	25.7796	26.2077	25.2463	25.9912	26.1604	25.1719	26.0935	25.7024
APOBR	Apolipoprotein B receptor	Q0VD83;H3BU97;C9J815;Q0VD83-3	25.3451	25.4548	25.7997	25.8057	25.8459		0.109735	0.905494		0.454552	0.802425		0.460583	0.710533		0.500801	0.553807		0.344817	0.488762		0.350847	0.698625		0.391066	0.438252		0.583039		25.8694	24.9089	25.2571	25.3511	25.3031	25.7103	25.4923	25.8834	26.0233	26.1449	25.3205	25.9517	26.0484	25.6998	25.7895
APOC1	Apolipoprotein C-I;Truncated apolipoprotein C-I	P02654	23.216	24.2539	22.9882	23.1766	23.716		1.03794	0.548218		-0.227842	0.842304		-0.0394192	0.981705		0.499998	0.593831		-1.26578	0.31002		-1.07736	0.584202		-0.537942	0.673656		0.35948		23.1583	23.5869	22.9027	23.7239	25.0359	24.002	22.9675	23.2127	22.7843	23.9495	22.7946	22.7856	23.6209	24.2803	23.2467
APOC2	Apolipoprotein C-II;Proapolipoprotein C-II	P02655	22.7132	24.4658	23.3297	23.352	23.7915		1.75257	0.574113		0.616442	0.862198		0.63874	0.778263		1.07826	0.615312		-1.13613	0.565228		-1.11383	0.643113		-0.674314	0.7404		0.57531		23.7796	21.3822	22.9779	23.5134	25.7415	24.1424	23.506	22.3264	24.1565	23.8288	23.0558	23.1712	23.1033	24.6281	23.6431
APOC3	Apolipoprotein C-III	P02656	24.4244	27.3689	25.6248	24.7118	26.5709		2.94449	0.543588		1.20035	0.795242		0.287334	0.939875		2.14652	0.576294		-1.74414	0.525817		-2.65716	0.584859		-0.79797	0.851992		0.488488		24.3101	25.9225	23.0407	26.4723	29.6629	25.9716	25.8481	25.4394	25.5869	25.4707	23.3101	25.3545	25.3778	28.9705	25.3645
APOE	Apolipoprotein E	P02649;H0Y7L5;E9PEV4;E7ERP7	27.2603	27.8773	27.64	27.5498	27.4571		0.617027	0.590165		0.379696	0.828988		0.289469	0.778083		0.196761	0.829808		-0.237331	0.560829		-0.327558	0.629344		-0.420266	0.488129		0.55997		27.1115	27.8799	26.7895	27.8203	28.1937	27.6181	27.5682	27.6389	27.7129	27.7195	27.5389	27.391	27.2979	27.8019	27.2714
APOH	Beta-2-glycoprotein 1	P02749	26.0983	26.3307	25.8776	25.6741	26.2907		0.232398	0.723477		-0.220706	0.861124		-0.424185	0.700674		0.192357	0.750536		-0.453103	0.39586		-0.656583	0.526404		-0.040041	0.788444		0.400404		26.4378	25.6237	26.2335	26.4024	26.329	26.2607	26.1273	25.4738	26.0317	26.1035	25.4266	25.4923	26.204	26.3153	26.3528
APP	Amyloid beta A4 protein;N-APP;Soluble APP-alpha;Soluble APP-beta;C99;Beta-amyloid protein 42;Beta-amyloid protein 40;C83;P3(42);P3(40);C80;Gamma-secretase C-terminal fragment 59;Gamma-secretase C-terminal fragment 57;Gamma-secretase C-terminal fragment 50;C31	B4DII8;P05067-8;P05067;P05067-7;P05067-9;E9PEV0;P05067-4;P05067-6;E9PG40;P05067-3;P05067-5;P05067-10;H7C0V9	30.589	30.6404	30.4903	30.3121	30.4003		0.0513337	0.926913		-0.0986951	0.882423		-0.276911	0.633998		-0.188706	0.65608		-0.150029	0.531331		-0.328245	0.543848		-0.24004	0.443483		0.438679		30.2869	30.8004	30.6798	30.4727	30.7771	30.6714	30.4334	30.4532	30.5844	30.2979	30.2869	30.3515	30.2979	30.3828	30.5203
APPL1	DCC-interacting protein 13-alpha	Q9UKG1	27.9047	27.8907	27.8385	27.8641	28.0107		-0.0139529	0.959943		-0.0661367	0.881992		-0.040603	0.86216		0.106091	0.758543		-0.0521838	0.872933		-0.0266501	0.929514		0.120044	0.743194		0.799626		27.9539	27.9705	27.7895	28.003	27.8858	27.7833	27.7195	28.019	27.7771	27.7518	27.9089	27.9316	27.9539	27.8203	28.258
APPL2	DCC-interacting protein 13-beta	Q8NEU8;F8W1P5;F5GZG0	30.3191	30.4967	30.4157	30.437	30.443		0.177642	0.552674		0.0965792	0.827841		0.117864	0.7892		0.123863	0.564061		-0.0810623	0.566443		-0.0597776	0.91016		-0.053779	0.685387		0.746828		30.4334	30.1724	30.3515	30.5754	30.4134	30.5014	30.4334	30.4727	30.341	30.2759	30.3303	30.7047	30.4032	30.4433	30.4823
APRT	Adenine phosphoribosyltransferase	P07741;H3BQZ9;G5E9J2;H3BQB1;H3BQF1	30.9222	30.8142	30.9794	31.048	30.9305		-0.108037	0.670245		0.0572561	0.852055		0.125848	0.857165		0.00832176	0.943819		0.165293	0.474201		0.233885	0.795238		0.116359	0.552671		0.821206		30.8973	31.0084	30.8608	30.6881	30.8004	30.9539	31.0544	30.8756	31.0084	30.8157	30.8081	31.5203	30.947	30.9046	30.94
ARAF	Serine/threonine-protein kinase A-Raf	P10398	26.0053	25.4324	26.0169	25.9435	25.9367		-0.572835	0.502805		0.0116533	0.984197		-0.0617536	0.880881		-0.0685749	0.911365		0.584488	0.270818		0.511081	0.544187		0.50426	0.469483		0.345746		25.9089	26.1776	25.9293	25.3679	25.2244	25.705	25.8623	26.1546	26.0338	26.067	26.0401	25.7234	25.8264	26.3712	25.6125
ARAP1	Arf-GAP with Rho-GAP domain, ANK repeat and PH domain-containing protein 1	Q96P48-3;Q96P48;E7EU13;Q96P48-2;Q96P48-4;Q96P48-1;Q96P48-7;Q96P48-5	29.9528	29.8443	30.1114	29.9363	30.0429		-0.108553	0.800115		0.158529	0.824837		-0.0165869	0.981691		0.0900942	0.803082		0.267082	0.307126		0.091966	0.872511		0.198647	0.44323		0.630937		29.7549	29.8843	30.2193	29.805	29.7195	30.0084	30.099	30.1361	30.099	29.7373	29.8872	30.1842	29.995	30.099	30.0349
ARCN1	Coatomer subunit delta	P48444;B0YIW6;E9PEU4	29.3633	29.0978	29.484	29.4781	29.6203		-0.265499	0.490117		0.120787	0.795334		0.114889	0.71131		0.257073	0.454853		0.386286	0.109286		0.380388	0.454215		0.522572	0.170856		0.0726534		29.3473	29.2354	29.5071	29.1483	29.0137	29.1312	29.4532	29.4881	29.5109	29.4012	29.4668	29.5664	29.6948	29.6629	29.5033
ARF1	ADP-ribosylation factor 1	P84077;F5H3A6	31.7686	31.7065	31.8618	31.8674	31.745		-0.0620874	0.717259		0.0931994	0.882151		0.0987835	0.659718		-0.0236556	0.952338		0.155287	0.680189		0.160871	0.580001		0.0384318	0.924554		0.844105		31.7653	31.8195	31.7211	31.8195	31.6372	31.6629	31.6798	32.1604	31.7453	31.8157	31.9746	31.8119	31.8042	31.4629	31.9677
ARF3	ADP-ribosylation factor 3	P61204;F5H423;B7ZB63	26.8129	23.8264	24.6841	22.5738	23.3601		-2.98648	0.499561		-2.12873	0.803931		-4.23912	0.145215		-3.4528	0.4268		0.857759	0.84372		-1.25263	0.673486		-0.466311	0.868903		0.295462		26.533	26.8142	27.0914	22.6683	23.3186	25.4923	23.4711	27.3828	23.1985	22.7304	22.1152	22.8757	22.2136	24.6983	23.1683
ARF4	ADP-ribosylation factor 4	P18085;C9JPM4;C9JAK5	28.5859	28.3452	28.8284	28.5178	28.392		-0.240672	0.753422		0.242493	0.379477		-0.068107	0.585934		-0.193922	0.519827		0.483165	0.501461		0.172565	0.873268		0.0467498	0.959948		0.49764		28.5898	28.5463	28.6216	28.7129	27.7581	28.5646	28.8324	28.8142	28.8385	28.5203	28.524	28.509	28.4629	28.2077	28.5052
ARF5	ADP-ribosylation factor 5	P84085;C9J1Z8	28.2648	28.3284	28.117	28.2977	28.0799		0.0636342	0.906574		-0.147788	0.85274		0.0328865	0.944838		-0.184873	0.654557		-0.211422	0.639788		-0.0307477	0.961749		-0.248507	0.589673		0.710322		28.3662	28.3828	28.0453	28.6004	28.1312	28.2535	28.3828	27.9705	27.9977	28.4823	28.1937	28.217	28.1312	28.258	27.8504
ARF6	ADP-ribosylation factor 6	P62330	27.4666	27.6796	27.7379	27.7463	27.8368		0.212986	0.789033		0.271333	0.82292		0.279739	0.717383		0.370253	0.564662		0.0583471	0.933749		0.0667534	0.942343		0.157267	0.807915		0.743394		27.3239	27.8682	27.2077	28.0349	27.2714	27.7325	27.8623	27.7195	27.632	27.5536	27.6931	27.9923	27.6931	27.726	28.0914
ARFGAP1	ADP-ribosylation factor GTPase-activating protein 1	Q8N6T3;F8W1U7;F8VWH9;E7EV62;Q8N6T3-2;E5RHT6;B7Z8H8;Q8N6T3-3;E5RHC5	25.1639	24.9346	24.9536	24.5217	23.9439		-0.229307	0.590217		-0.210368	0.85078		-0.642237	0.613484		-1.22003	0.56108		0.0189381	0.984629		-0.41293	0.687503		-0.990726	0.60812		0.540714		25.0691	25.2207	25.2021	25.1135	24.6971	24.9933	24.6865	24.7286	25.4457	24.5225	25.019	24.0236	22.5793	25.2133	24.0391
ARFGAP2	ADP-ribosylation factor GTPase-activating protein 2	Q8N6H7;G5E9L0;E9PQP3;E9PIY6;B4DX29;B4E327;E9PMU9	27.3292	27.2721	27.2525	27.2447	27.2826		-0.0570946	0.910956		-0.0766379	0.910965		-0.0844529	0.882755		-0.0465965	0.910695		-0.0195433	0.953723		-0.0273584	0.963725		0.010498	0.977145		0.987964		27.1015	27.2891	27.5969	27.2714	27.1214	27.4234	27.3992	27.2077	27.1507	27.0608	27.1795	27.4938	27.189	27.2354	27.4234
ARFGAP3	ADP-ribosylation factor GTPase-activating protein 3	Q9NP61;C9JZR4;E9PB03	24.3554	23.026	24.1416	23.9739	24.0452		-1.3294	0.500042		-0.213823	0.84592		-0.381535	0.744238		-0.310266	0.566841		1.11558	0.351594		0.947867	0.593629		1.01914	0.422148		0.293938		24.7543	24.1174	24.1946	23.645	23.1796	22.2535	23.9847	24.1795	24.2607	24.2535	24.3443	23.3239	24.0691	24.0359	24.0306
ARFGEF1	Brefeldin A-inhibited guanine nucleotide-exchange protein 1	Q9Y6D6;E5RIF2	28.5008	28.3214	28.7441	28.7156	28.6838		-0.17939	0.482279		0.243249	0.405623		0.214736	0.614388		0.182981	0.442183		0.422639	0.100569		0.394126	0.551906		0.362371	0.194038		0.112127		28.4976	28.5536	28.4512	28.2535	28.3869	28.3239	28.7739	28.7453	28.7129	28.5682	28.6898	28.8887	28.5898	28.7195	28.7421
ARFGEF2	Brefeldin A-inhibited guanine nucleotide-exchange protein 2	Q9Y6D5	25.0668	25.0307	25.4962	25.6568	25.3453		-0.0361226	0.952975		0.429454	0.761891		0.590025	0.593253		0.278517	0.553249		0.465577	0.316448		0.626148	0.533325		0.31464	0.476493		0.243083		25.0401	24.8433	25.317	25.0148	24.7846	25.2926	25.604	25.4202	25.4645	25.632	25.4457	25.8927	25.3135	25.2058	25.5165
ARFIP1	Arfaptin-1	P53367	26.3027	26.5427	26.6901	26.2896	26.5194		0.240093	0.610355		0.387447	0.834697		-0.0130215	0.981699		0.2167	0.732804		0.147353	0.645334		-0.253115	0.583503		-0.023393	0.975173		0.557681		26.558	26.1055	26.2445	26.4614	26.673	26.4938	26.518	26.9202	26.632	26.2151	26.1312	26.5225	26.189	26.9202	26.4488
ARFRP1	ADP-ribosylation factor-related protein 1	Q13795;H0Y2L5;Q13795-2	24.0961	23.8295	23.3679	23.2099	23.1602		-0.266603	0.787715		-0.728175	0.791703		-0.886238	0.704226		-0.935904	0.526086		-0.461571	0.608449		-0.619635	0.787491		-0.6693	0.501886		0.643642		24.2678	23.4611	24.5593	23.7077	23.632	24.1488	23.4923	22.7016	23.9098	23.9225	23.7077	21.9994	23.7492	22.5015	23.2299
ARHGAP1	Rho GTPase-activating protein 1	Q07960;E9PCG8;H0YE29	31.3772	31.3739	31.3989	31.314	31.4665		-0.00331752	0.986478		0.0217355	0.961716		-0.0632159	0.811048		0.0893364	0.758138		0.025053	0.895908		-0.0598984	0.833116		0.0926539	0.73358		0.792422		31.4384	31.4284	31.2647	31.3672	31.341	31.4134	31.2814	31.4234	31.4919	31.2703	31.2135	31.4581	31.3724	31.6756	31.3515
ARHGAP10	Rho GTPase-activating protein 10	A1A4S6;H0Y8W5	27.5285	27.1841	27.3087	27.1921	27.2031		-0.344444	0.594898		-0.219795	0.849971		-0.33641	0.714649		-0.325408	0.549904		0.124649	0.817138		0.00803439	0.994642		0.0190366	0.957193		0.702675		27.7064	27.1795	27.6998	27.341	27.2354	26.976	27.019	27.6181	27.2891	27.2979	27.5014	26.7771	27.1214	27.2803	27.2077
ARHGAP15	Rho GTPase-activating protein 15	Q53QZ3	24.2371	23.7569	24.0054	23.0165	23.3764		-0.480151	0.690373		-0.231681	0.911116		-1.22057	0.655808		-0.860706	0.551766		0.24847	0.887702		-0.740414	0.813505		-0.380555	0.803525		0.683515		24.5285	24.2463	23.9365	22.9672	24.2021	24.1015	23.1092	24.275	24.632	21.5966	24.3376	23.1154	22.4873	24.0526	23.5892
ARHGAP17	Rho GTPase-activating protein 17	Q68EM7-2;Q68EM7;Q68EM7-6;Q68EM7-5;Q68EM7-4;C9IZD3	26.7921	26.7448	26.7549	26.6463	26.5039		-0.0473436	0.939592		-0.0372136	0.981864		-0.145871	0.774903		-0.288286	0.586819		0.0101299	0.993008		-0.0985279	0.877565		-0.240943	0.647571		0.835127		26.6595	26.6458	27.0711	26.9869	26.7645	26.4831	26.4346	27.2262	26.604	26.4504	26.6865	26.8019	26.4846	26.7645	26.2625
ARHGAP18	Rho GTPase-activating protein 18	Q8N392;Q8N392-2	31.2125	31.1437	31.2882	31.2494	31.2122		-0.0688388	0.824582		0.0756219	0.855242		0.0368716	0.900967		-0.000389735	0.998082		0.144461	0.495216		0.10571	0.761734		0.068449	0.769194		0.754666		31.13	31.13	31.3776	31.2019	30.9814	31.2478	31.2308	31.325	31.3088	31.1361	31.3088	31.3033	31.2535	31.1239	31.2591
ARHGAP21	Rho GTPase-activating protein 21	Q5T5U3;E9PED6;E7ESW5;F8W9U9;Q5T5U3-3;F8W7V1	25.8941	25.5409	26.0308	25.7171	25.5876		-0.353216	0.542444		0.136713	0.864756		-0.177055	0.616312		-0.306531	0.659462		0.489929	0.421306		0.176161	0.772561		0.0466849	0.960792		0.550875		25.945	25.7746	25.9628	25.6891	25.2207	25.7129	25.7129	26.3187	26.0608	25.6676	25.6403	25.8433	25.2354	26.1234	25.4041
ARHGAP25	Rho GTPase-activating protein 25	F5H3I2;G5E9G2;P42331-4;H7C4P1;E7EU69;E9PFQ7;P42331-3;P42331;C9JB56	25.4334	25.3048	25.3009	25.3797	25.4594		-0.128592	0.729998		-0.132508	0.864467		-0.0537364	0.958687		0.0260188	0.941377		-0.00391642	0.995713		0.0748552	0.942198		0.15461	0.702859		0.959955		25.3031	25.5898	25.4073	25.0813	25.452	25.3811	25.2856	25.5812	25.0359	24.8764	25.4362	25.8264	25.6513	25.452	25.275
ARHGAP35	Rho GTPase-activating protein 35	Q9NRY4-2;Q9NRY4;A2RRE5	23.5955	23.8226	24.0313	24.1791	23.9474		0.227109	0.922674		0.435844	0.88527		0.583656	0.781441		0.351903	0.846823		0.208735	0.701277		0.356547	0.655203		0.124793	0.845428		0.887357		22.1657	24.1719	24.4488	23.8858	23.4564	24.1255	24.2535	23.8385	24.002	24.1719	23.9584	24.4071	24.2535	23.7182	23.8704
ARHGAP4	Rho GTPase-activating protein 4	P98171;P98171-2;F5GZW3;E7EQN5;E9PCM6	27.3379	27.1308	27.1886	27.1727	27.0867		-0.207135	0.661952		-0.149261	0.835707		-0.165208	0.72621		-0.251181	0.553674		0.0578734	0.760838		0.0419267	0.8815		-0.0440464	0.84026		0.55128		27.3325	27.0914	27.5898	27.2625	27.1214	27.0084	27.2262	27.1507	27.189	27.2077	27.1214	27.189	27.019	27.0711	27.17
ARHGAP6	Rho GTPase-activating protein 6	O43182-4;O43182;B4DN07;H7BYE6;O43182-5;O43182-2;B7Z8H7;O43182-3	30.6829	30.8255	30.6525	30.8381	30.7175		0.142576	0.6071		-0.0304228	0.930125		0.155218	0.630692		0.034612	0.880345		-0.172998	0.422609		0.0126425	0.970741		-0.107964	0.662525		0.506856		30.8004	30.6198	30.6285	30.7533	30.9539	30.7692	30.6629	30.7373	30.5573	30.7129	30.8756	30.9259	30.8534	30.6881	30.611
ARHGDIA	Rho GDP-dissociation inhibitor 1	P52565;A8MXW0	30.5459	30.8079	30.6858	31.0926	31.0484		0.262051	0.714569		0.13998	0.894808		0.546777	0.612414		0.502501	0.551889		-0.12207	0.707402		0.284726	0.57057		0.240451	0.593604		0.414151		30.2193	31.015	30.4032	30.6458	30.947	30.8309	30.8829	30.5203	30.6544	30.9046	31.1483	31.225	31.2759	30.7453	31.1239
ARHGDIB	Rho GDP-dissociation inhibitor 2	P52566;F5H3P3;F5H6Q0;H0YGX7;F5H2R5	32.0806	32.4174	32.2531	32.3873	32.3004		0.336774	0.528781		0.172497	0.811672		0.306762	0.632486		0.219814	0.553228		-0.164276	0.608501		-0.0300115	0.948825		-0.11696	0.779605		0.456195		31.9983	32.1634	32.08	32.2786	32.6458	32.3276	32.375	32.2759	32.1084	32.2535	32.4359	32.4727	32.3436	32.0705	32.4871
ARHGEF1	Rho guanine nucleotide exchange factor 1	Q92888;Q92888-3;Q92888-2;Q6NX52	26.4968	26.819	26.5097	26.5659	26.5626		0.322187	0.505124		0.0128632	0.97706		0.0691191	0.831704		0.0658162	0.881393		-0.309324	0.287651		-0.253068	0.56889		-0.256371	0.574005		0.524366		26.4298	26.4425	26.6181	26.7771	26.726	26.9539	26.3959	26.515	26.6181	26.5419	26.417	26.7389	26.7771	26.2244	26.6865
ARHGEF12	Rho guanine nucleotide exchange factor 12	Q9NZN5-2;Q9NZN5;E9PMR6	26.9957	26.6085	26.9921	26.8328	26.5919		-0.387138	0.543363		-0.00354322	0.99563		-0.162875	0.740925		-0.403746	0.476615		0.383595	0.340872		0.224263	0.672154		-0.0166079	0.975255		0.321231		26.9316	26.8019	27.2535	26.6181	26.3811	26.8264	27.0505	27.0401	26.8858	26.7129	27.0084	26.7771	26.5609	26.7771	26.4378
ARHGEF2	Rho guanine nucleotide exchange factor 2	Q5VY93;Q92974-3;Q92974-2;Q92974;F5H3H5;B7Z977	27.7141	27.5286	27.7388	27.3954	27.5426		-0.18554	0.458613		0.0247033	0.963731		-0.318666	0.583683		-0.171472	0.54918		0.210243	0.422165		-0.133126	0.687873		0.014068	0.961899		0.321234		27.6865	27.7895	27.6663	27.5463	27.5609	27.4785	27.5609	27.7581	27.8973	27.3992	27.2262	27.5609	27.4785	27.726	27.4234
ARHGEF6	Rho guanine nucleotide exchange factor 6	F5H8B2;B7Z3C7;Q15052-2;Q15052	23.9941	24.407	23.9624	24.0949	24.2638		0.412938	0.713717		-0.0316334	0.992627		0.100786	0.952797		0.269719	0.805693		-0.444571	0.710509		-0.312152	0.761156		-0.143219	0.740027		0.907958		24.4425	24.3578	23.1818	24.4862	24.5105	24.2244	24.9316	23.6649	23.2908	24.48	23.5511	24.2535	23.9847	24.3578	24.4488
ARHGEF7	Rho guanine nucleotide exchange factor 7	B1ALK7;B7Z6G2;Q14155-1;Q14155-5;Q14155-6;Q14155-2;Q14155-3;Q14155;E7EUY6;H0YFH7;E9PDQ5	27.9395	27.7739	28.1689	27.9942	28.0601		-0.165537	0.527485		0.229408	0.760114		0.0546761	0.779293		0.12058	0.651851		0.394945	0.199138		0.220213	0.558707		0.286117	0.391531		0.240553		27.8682	28.0243	27.9259	27.7129	27.8445	27.7645	28.066	28.1604	28.2803	27.9595	27.9316	28.0914	27.8741	28.17	28.1361
ARL1	ADP-ribosylation factor-like protein 1	B4DWW1;P40616;F8VYN9;B4DZG7	25.3897	25.0654	27.0088	26.9737	25.968		-0.324279	0.955524		1.61918	0.842635		1.58402	0.758097		0.578332	0.902695		1.94346	0.394602		1.9083	0.572756		0.90261	0.764528		0.686946		27.1795	26.8741	22.1154	23.7016	24.8215	26.673	27.2354	26.6998	27.0914	26.6458	26.9428	27.3325	27.1984	24.42	26.2856
ARL2	ADP-ribosylation factor-like protein 2	P36404;G3V184	24.9619	25.1297	25.0879	25.0642	25.0005		0.167807	0.773517		0.125945	0.845022		0.102303	0.877464		0.0386111	0.911154		-0.0418619	0.93997		-0.0655041	0.942775		-0.129196	0.780726		0.93707		25.002	24.7234	25.1604	25.4707	25.0608	24.8576	25.0526	25.1095	25.1015	25.0608	24.7441	25.3877	24.9406	25.0894	24.9716
ARL3	ADP-ribosylation factor-like protein 3	P36405	27.0778	27.0879	27.2904	27.0207	27.1141		0.0101325	0.980738		0.212632	0.829915		-0.0570876	0.862736		0.0363274	0.676276		0.202499	0.593287		-0.0672201	0.917309		0.0261949	0.949711		0.605763		27.0505	27.0813	27.1015	27.2891	27.1604	26.8142	27.2445	27.4473	27.1795	26.9202	26.8973	27.2445	27.1115	27.0608	27.17
ARL6IP5	PRA1 family protein 3	O75915	26.8049	26.9968	27.3759	27.7909	28.0877		0.191879	0.920956		0.571035	0.834925		0.986037	0.633494		1.28283	0.514658		0.379157	0.565187		0.794158	0.535904		1.09095	0.397769		0.347503		25.7945	27.6663	26.9539	26.441	27.217	27.3325	27.4314	27.4073	27.2891	27.7129	27.6251	28.0349	27.8564	28.6424	27.7645
ARL8B	ADP-ribosylation factor-like protein 8B	Q9NVJ2	27.3366	27.3811	27.623	27.9261	27.8307		0.0445379	0.960885		0.286395	0.84758		0.589575	0.614303		0.494155	0.553588		0.241857	0.619756		0.545037	0.5427		0.449617	0.374048		0.396059		26.9869	27.8916	27.1312	27.1604	27.6251	27.3578	27.9316	27.5463	27.391	27.8324	27.8445	28.1015	27.7325	27.8973	27.8623
ARMC1	Armadillo repeat-containing protein 1	Q9NVT9;E5RJ86	24.1177	23.3214	24.6148	24.7589	24.4808		-0.796243	0.754344		0.497121	0.888497		0.641179	0.792181		0.363164	0.863762		1.29336	0.377237		1.43742	0.546365		1.15941	0.445429		0.539382		25.1253	24.8093	22.4184	23.407	24.148	22.4093	24.2744	24.6703	24.8997	24.5926	24.7389	24.945	24.1924	24.6376	24.6126
ARMC6	Armadillo repeat-containing protein 6	Q6NXE6-2;Q6NXE6;B4E1N1;F5GYG2	24.4733	24.3117	23.6552	24.538	24.6039		-0.161614	0.739145		-0.818168	0.842478		0.064628	0.926783		0.130594	0.863473		-0.656554	0.72535		0.226242	0.588373		0.292208	0.650841		0.665539		24.7746	24.5045	24.141	24.2961	24.2678	24.3712	24.5812	24.2961	22.0882	24.4362	24.4234	24.7543	24.632	25.0233	24.1565
ARMC8	Armadillo repeat-containing protein 8	A8MTG8;Q8IUR7-2;Q8IUR7;Q8IUR7-3;F5GWK4;B7Z637;B7Z441;H0YGM5;G5E9V6;Q8IUR7-6;G5E9V7	25.68	26.1379	25.6702	25.936	25.7776		0.457853	0.47828		-0.00989151	0.989963		0.255989	0.824354		0.0975494	0.828772		-0.467744	0.361335		-0.201864	0.584581		-0.360303	0.481222		0.364439		25.6649	25.6649	25.7103	26.3273	26.0338	26.0526	25.3679	25.7338	25.9089	25.8504	26.0127	25.945	25.9225	25.9869	25.4234
ARMT1	Protein-glutamate O-methyltransferase	Q9H993;F5GZY1	26.3514	26.4331	26.5454	26.8682	26.5436		0.0816606	0.71419		0.193974	0.827263		0.516735	0.566367		0.192118	0.751448		0.112313	0.795368		0.435074	0.536138		0.110457	0.862667		0.516061		26.2463	26.3959	26.4122	26.4378	26.3256	26.5359	26.5754	26.8019	26.2589	26.7771	26.6865	27.141	26.5463	26.1194	26.965
ARPC1A	Actin-related protein 2/3 complex subunit 1A	E9PF58;Q92747;B4DLQ7	27.2524	27.0479	27.525	27.2673	27.3972		-0.204501	0.846449		0.272606	0.808894		0.0148735	0.98105		0.144772	0.745504		0.477107	0.581832		0.219374	0.873123		0.349273	0.72754		0.702175		27.5014	27.0296	27.2262	27.673	26.3894	27.0813	27.5754	27.4314	27.5682	27.2714	27.3992	27.1312	27.4629	27.5682	27.1604
ARPC1B	Actin-related protein 2/3 complex subunit 1B	O15143;F8WCG3	32.9643	33.2298	32.8509	33.1866	33.1639		0.265559	0.543331		-0.113377	0.834439		0.222387	0.655784		0.199656	0.618861		-0.378935	0.193176		-0.0431722	0.908602		-0.0659027	0.840808		0.312931		32.7514	33.0299	33.1115	33.1529	33.3568	33.1798	32.8664	32.8497	32.8366	33.0266	33.2164	33.3169	33.2759	32.94	33.2759
ARPC2	Actin-related protein 2/3 complex subunit 2	O15144	32.6995	32.8777	32.8453	32.8946	32.9012		0.178254	0.503992		0.145821	0.804611		0.195143	0.596928		0.201744	0.387959		-0.0324338	0.873273		0.0168889	0.957217		0.0234896	0.856948		0.32798		32.6671	32.684	32.7473	32.8042	32.9626	32.8664	32.8271	32.9435	32.7653	32.9099	32.7672	33.0067	32.8571	32.9241	32.9224
ARPC3	Actin-related protein 2/3 complex subunit 3	O15145;B4DM63	31.7254	31.8786	31.7783	31.622	31.9045		0.153197	0.610362		0.0529003	0.904844		-0.103378	0.654567		0.179144	0.448182		-0.100297	0.719925		-0.256575	0.533519		0.0259469	0.898172		0.322418		31.6458	31.6881	31.8422	31.8422	31.7653	32.0283	31.6415	31.94	31.7533	31.6501	31.6586	31.5573	31.8937	31.9117	31.9081
ARPC4	Actin-related protein 2/3 complex subunit 4	P59998;F8WCF6;C9JWM7;F8WDD7;E7ETI0;H7C0A3;F6TTL5	32.4633	32.0054	32.7078	32.2731	32.294		-0.45795	0.540765		0.244456	0.826559		-0.190245	0.778283		-0.169301	0.797816		0.702406	0.106213		0.267705	0.554322		0.288649	0.493899		0.303765		32.5014	32.0958	32.7927	31.94	32.0217	32.0544	32.8271	32.5956	32.7006	32.4605	32.08	32.2786	32.1331	32.622	32.1269
ARPC5	Actin-related protein 2/3 complex subunit 5	O15511;B1ALC0;O15511-2	31.1554	31.0299	31.2452	31.2871	31.2564		-0.125474	0.627849		0.0898863	0.845665		0.131757	0.735316		0.100992	0.704872		0.215361	0.214517		0.257231	0.549586		0.226466	0.39425		0.393418		31.0084	31.1544	31.3033	30.9746	31.0737	31.0414	31.2193	31.3088	31.2077	31.3303	31.1177	31.4134	31.3515	31.1361	31.2814
ARPC5L	Actin-related protein 2/3 complex subunit 5-like protein	Q9BPX5	25.8082	25.9148	25.9939	25.7524	25.8455		0.106621	0.88028		0.185721	0.812419		-0.0557505	0.891016		0.0373522	0.880107		0.0790997	0.911184		-0.162372	0.860732		-0.0692692	0.908974		0.813524		25.6237	25.867	25.9338	25.9134	26.3205	25.5105	25.9225	25.9738	26.0854	25.8118	25.5551	25.8904	25.918	25.8166	25.8019
ARRB1	Beta-arrestin-1	P49407-2	30.7236	30.7571	30.6722	30.868	30.8172		0.0334657	0.941617		-0.0514463	0.932668		0.144393	0.781788		0.0936	0.812056		-0.084912	0.702652		0.110927	0.848049		0.0601343	0.848689		0.811627		30.6458	30.9677	30.5573	30.7613	30.6198	30.8901	30.7692	30.6629	30.5844	30.8004	30.6798	31.1239	30.8901	30.6285	30.933
ARRB2	Beta-arrestin-2	P32121-2;P32121;P32121-3;H0Y688;Q68DZ5	24.1155	23.7264	24.0496	22.7521	23.7735		-0.389108	0.719421		-0.0659192	0.969687		-1.36342	0.801084		-0.34201	0.695601		0.323189	0.77189		0	0		0.0470982	0.973285		0.295804		24.1946	23.6906	24.4614	23.1496	23.7174	24.3123	23.9537	23.5911	24.604	22.9274	22.9404	22.3885	24.239	23.7742	23.3073
ARRDC1	Arrestin domain-containing protein 1	Q5T370;Q8N5I2;F2Z3I4;Q5T371	23.6155	22.8033	23.2634	23.431	23.1968		-0.812211	0.549812		-0.352097	0.861068		-0.184533	0.885623		-0.418722	0.654743		0.460114	0.768734		0.627678	0.750924		0.39349	0.769674		0.786617		23.5165	23.5404	23.7895	22.0387	23.0621	23.309	22.3163	23.4676	24.0062	23.2328	22.8236	24.2365	22.5789	23.181	23.8304
ASAH1	Acid ceramidase;Acid ceramidase subunit alpha;Acid ceramidase subunit beta	E7ERV9;E7EMM4;Q13510;Q13510-2;E9PDS0	24.0745	24.0513	25.0032	25.0425	23.5325		-0.0232728	0.997701		0.92864	0.82759		0.967965	0.712487		-0.542044	0.838079		0.951913	0.487625		0.991238	0.583952		-0.518771	0.821498		0.564526		22.574	24.5522	25.0975	23.5061	23.5462	25.1015	25.3578	24.976	24.6757	25.1642	24.9316	25.0317	22.8402	25.0443	22.713
ASAP1	Arf-GAP with SH3 domain, ANK repeat and PH domain-containing protein 1	Q9ULH1;F8WBW0;Q9ULH1-2;H0YBF7	29.9568	29.984	30.0814	30.1391	30.1023		0.0272566	0.936304		0.124648	0.822596		0.182332	0.632613		0.145542	0.580044		0.0973918	0.511173		0.155075	0.55518		0.118285	0.469233		0.477237		29.7755	30.0084	30.0864	30.0864	29.9539	29.9117	30.0217	30.0864	30.1361	30.099	30.099	30.2193	30.1724	30.0608	30.0737
ASAP2	Arf-GAP with SH3 domain, ANK repeat and PH domain-containing protein 2	O43150	29.2532	29.5425	29.4883	29.5775	29.5987		0.289211	0.546481		0.235017	0.814928		0.324277	0.640063		0.345457	0.52673		-0.0541941	0.731349		0.0350666	0.942595		0.0562464	0.865462		0.502582		29.0608	29.5146	29.1842	29.5628	29.4274	29.6372	29.5389	29.4668	29.4591	29.326	29.6612	29.7453	29.7502	29.3662	29.6798
ASL	Argininosuccinate lyase	P04424;E7EMI0;E9PE48;F8W943	28.4891	28.587	28.538	28.7431	28.7598		0.0979576	0.653515		0.0489572	0.864373		0.254011	0.64841		0.270761	0.445908		-0.0490004	0.827283		0.156053	0.787108		0.172803	0.46286		0.454951		28.4154	28.5278	28.524	28.6251	28.4629	28.673	28.5826	28.604	28.4274	28.7129	28.5052	29.0111	28.8324	28.6389	28.8081
ASMTL	N-acetylserotonin O-methyltransferase-like protein	O95671-2;O95671;E7ER97;F5GXH4	26.337	27.0582	26.532	26.9582	26.9268		0.721195	0.495922		0.19503	0.849247		0.621217	0.583105		0.589827	0.46249		-0.526166	0.211303		-0.0999781	0.752447		-0.131368	0.68175		0.215554		25.9539	26.4815	26.5754	27.1795	26.976	27.019	26.6998	26.4938	26.4024	27.0914	26.8973	26.8858	27.141	26.7771	26.8623
ASNA1	ATPase ASNA1	O43681	28.2982	28.1549	28.518	28.5345	28.3798		-0.143262	0.703467		0.219759	0.792757		0.236342	0.659012		0.0816129	0.71895		0.363021	0.362412		0.379604	0.553677		0.224875	0.444795		0.369371		28.203	28.217	28.4746	28.1747	27.9705	28.3196	28.3282	28.5426	28.6831	28.6181	28.2891	28.6964	28.3452	28.391	28.4032
ASPSCR1	Tether containing UBX domain for GLUT4	Q9BZE9;Q9BZE9-2;Q9BZE9-3;C9JAL9;Q9BZE9-4	24.444	24.1326	24.3588	23.8262	24.3373		-0.311404	0.816607		-0.0851536	0.863106		-0.617721	0.759224		-0.106649	0.885242		0.22625	0.874244		-0.306317	0.916488		0.204755	0.886716		0.88015		24.4298	24.2535	24.6486	24.7796	24.4551	23.163	24.3645	24.2821	24.4298	24.4234	22.563	24.4923	24.8904	24.0772	24.0443
ASRGL1	Isoaspartyl peptidase/L-asparaginase;Isoaspartyl peptidase/L-asparaginase alpha chain;Isoaspartyl peptidase/L-asparaginase beta chain	Q7L266;Q7L266-2	23.448	23.9962	23.9405	24.1125	23.9887		0.548264	0.729885		0.492553	0.850896		0.664534	0.715323		0.540689	0.704506		-0.0557105	0.941846		0.116271	0.896116		-0.00757408	0.991397		0.710285		24.3239	22.4217	23.5983	23.5684	24.3844	24.0359	23.7895	24.1095	23.9225	24.2244	24.0772	24.0359	23.8191	24.2244	23.9225
ATE1	Arginyl-tRNA--protein transferase 1	O95260-2;F5GXE4;B4E107	27.9775	28.2377	27.9932	28.2377	28.2445		0.260231	0.730459		0.0157534	0.991592		0.26027	0.788087		0.26701	0.732429		-0.244478	0.388514		3.94185e-05	0.999848		0.00677872	0.989873		0.768411		27.524	28.4938	27.9146	28.0965	28.3452	28.2714	27.8973	28.1507	27.9316	28.0084	28.1115	28.5934	28.249	28.0137	28.4707
ATG16L1	Autophagy-related protein 16-1	E7EVC7;Q676U5-2;Q676U5;Q676U5-3;E7EVS5;Q676U5-5;Q676U5-4	23.7775	23.8037	23.4496	23.5935	22.924		0.0261739	0.970563		-0.327875	0.888611		-0.183981	0.78175		-0.853461	0.518969		-0.354049	0.810158		-0.210155	0.706434		-0.879635	0.44054		0.614024		23.8481	23.391	24.0935	24.0608	23.632	23.7182	22.3523	24.1015	23.895	23.5165	23.4551	23.8089	23.3376	23.2491	22.1854
ATG3	Ubiquitin-like-conjugating enzyme ATG3	Q9NT62;Q9NT62-2	27.0024	26.8598	27.1916	27.2466	26.9073		-0.142638	0.662181		0.189224	0.754283		0.244214	0.602117		-0.0951163	0.620215		0.331862	0.286101		0.386852	0.553824		0.0475216	0.862958		0.195983		26.8973	27.0084	27.1015	26.7771	26.7518	27.0505	27.141	27.2077	27.2262	27.1795	27.2625	27.2979	26.8385	26.8858	26.9977
ATG4B	Cysteine protease ATG4B	Q9Y4P1-6;Q9Y4P1;Q9Y4P1-2;C9JIK8;H7C2A6;F8WD71;F5H7P2;Q9Y4P1-4	24.8969	24.9671	24.8354	25.1098	25.2663		0.0701256	0.909897		-0.0615241	0.939884		0.212868	0.69373		0.369423	0.520809		-0.13165	0.809947		0.142742	0.841865		0.299297	0.565898		0.51896		24.6486	25.0317	25.0105	25.2926	24.7846	24.824	24.7129	25.1015	24.6918	25.1642	24.9225	25.2426	25.4707	25.0148	25.3135
ATG5	Autophagy protein 5	Q9H1Y0;Q9H1Y0-2	25.3326	25.6341	25.7022	25.4654	25.822		0.301533	0.78832		0.369666	0.830518		0.132838	0.917994		0.489455	0.569666		0.0681324	0.935933		-0.168695	0.902448		0.187922	0.785026		0.740888		24.7077	25.5105	25.7796	26.1585	25.5195	25.2244	25.6595	25.8433	25.604	25.4234	25.0526	25.9202	25.8528	25.8312	25.7821
ATG7	Ubiquitin-like modifier-activating enzyme ATG7	O95352;E9PB95;O95352-2	26.5471	26.5835	26.6277	26.7571	26.5387		0.0363572	0.967385		0.0805321	0.961442		0.209915	0.852825		-0.00848262	0.988574		0.0441748	0.950744		0.173557	0.879926		-0.0448399	0.909319		0.962066		27.0296	26.1661	26.4457	26.8385	26.341	26.5711	26.6181	26.9428	26.3222	26.3662	26.5725	27.3325	26.632	26.521	26.4629
ATG9A	Autophagy-related protein 9A	Q7Z3C6-2;Q7Z3C6;H7C1G6;H7C152	24.3886	24.5038	23.8195	23.8323	23.5622		0.115232	0.880991		-0.569078	0.817724		-0.556278	0.73656		-0.826375	0.567427		-0.68431	0.302531		-0.67151	0.686947		-0.941607	0.470206		0.566522		24.0526	24.2891	24.824	24.6486	24.6757	24.1871	23.7895	24.0935	23.5754	24.4551	24.1565	22.8852	24.1174	23.9672	22.6019
ATIC	Bifunctional purine biosynthesis protein PURH;Phosphoribosylaminoimidazolecarboxamide formyltransferase;IMP cyclohydrolase	E9PBU3;P31939;F5GWY2	30.5253	30.4009	30.5974	30.5753	30.6105		-0.12434	0.667775		0.0721277	0.832416		0.0500088	0.725325		0.0852133	0.553379		0.196468	0.454822		0.174349	0.583926		0.209553	0.445064		0.391762		30.5844	30.4433	30.5481	30.5109	30.2193	30.4727	30.611	30.6798	30.5014	30.5844	30.5481	30.5934	30.5664	30.6629	30.6022
ATL3	Atlastin-3	F5H6I7;Q6DD88;C9JUU1	25.7965	25.9184	26.4561	26.3771	26.9035		0.12188	0.945511		0.659559	0.829682		0.58056	0.742383		1.10694	0.523735		0.53768	0.393207		0.45868	0.536471		0.985059	0.181808		0.395581		24.7695	26.6595	25.9606	25.9157	26.1371	25.7024	26.0732	26.518	26.7771	26.1194	26.518	26.4938	26.8623	26.8504	26.9977
ATOX1	Copper transport protein ATOX1	E5RGN3;E5RIM7;O00244	26.0448	26.3187	26.2902	26.363	26.4621		0.273881	0.665947		0.245384	0.831803		0.31824	0.68215		0.417313	0.548897		-0.0284971	0.95512		0.0443592	0.941249		0.143431	0.737603		0.609977		26.1174	25.6811	26.3359	26.2979	26.521	26.1371	26.4831	26.067	26.3205	26.228	26.2571	26.604	26.3325	26.341	26.7129
ATP1A1	Sodium/potassium-transporting ATPase subunit alpha-1	B7Z3U6;P05023;F5H3A1;H7BXX5;P05023-2	23.9942	24.192	24.1877	23.6582	24.5319		0.197735	0.847754		0.193481	0.90665		-0.336037	0.850571		0.537682	0.434573		-0.00425402	0.997992		-0.533772	0.841304		0.339947	0.73043		0.737404		23.9648	24.1946	23.8232	23.4733	24.7182	24.3844	24.6096	24.5165	23.437	24.1488	22.4546	24.3712	24.4984	24.7129	24.3844
ATP2A2	Sarcoplasmic/endoplasmic reticulum calcium ATPase 2	P16615;P16615-5;P16615-2;P16615-3;P16615-4;H7C5W9	27.0633	27.3865	27.4387	27.9617	28.2617		0.323236	0.84248		0.375456	0.869279		0.898389	0.661782		1.1984	0.522349		0.05222	0.942502		0.575152	0.553835		0.875168	0.391355		0.380638		26.0359	27.965	27.189	26.9539	27.4862	27.7195	27.3239	27.5609	27.4314	27.7645	28.1556	27.965	27.8445	28.4354	28.5052
ATP2A3	Sarcoplasmic/endoplasmic reticulum calcium ATPase 3	Q93084-4;Q93084-2;Q93084-3;Q93084-7;Q93084;Q93084-6;Q93084-5	29.4676	29.7063	30.0313	30.422	30.7437		0.238752	0.913567		0.563664	0.850569		0.954458	0.684903		1.2761	0.537034		0.324912	0.599863		0.715705	0.553789		1.03734	0.360023		0.428135		28.3196	30.6458	29.4374	29.2123	29.8203	30.0864	30.1724	29.9814	29.94	30.2077	30.362	30.6964	30.4727	30.8756	30.8829
ATP2C1	Calcium-transporting ATPase type 2C member 1	H0Y2Q7;P98194-2;P98194-4;P98194;P98194-3;P98194-5;P98194-6;G3XAH8;E7ERC6;H0Y9V7;G8JLN9;H0Y8X9;H0Y9S7	26.3822	26.3024	26.6918	26.7231	26.8012		-0.0798626	0.94857		0.309563	0.803908		0.340834	0.703832		0.41899	0.528592		0.389425	0.622013		0.420696	0.73063		0.498852	0.553204		0.604344		25.976	26.604	26.5667	25.6568	26.5374	26.7129	26.509	26.7645	26.8019	26.8385	26.9316	26.3992	26.7389	26.6998	26.965
ATP5A1	ATP synthase subunit alpha, mitochondrial	P25705;A8K092	30.6295	30.9642	30.792	31.2253	31.4561		0.33479	0.670169		0.162537	0.832992		0.595807	0.583196		0.826612	0.41304		-0.172253	0.785512		0.261017	0.783752		0.491822	0.463208		0.239523		30.3515	30.7211	30.8157	30.7613	31.4433	30.6881	30.8973	30.6629	30.8157	31.3828	31.0283	31.2647	31.362	31.5481	31.4581
ATP5B	ATP synthase subunit beta, mitochondrial;ATP synthase subunit beta	P06576;F8VPV9;H0YH81;F8W079	30.8143	31.1362	31.1225	31.4555	31.7464		0.321908	0.688566		0.3082	0.793573		0.641195	0.566793		0.932079	0.417136		-0.0137088	0.988878		0.319287	0.690961		0.610171	0.437022		0.241485		30.4919	30.8901	31.0608	30.8004	31.5799	31.0283	31.1783	30.947	31.2422	31.6372	31.3672	31.362	31.6586	31.9916	31.5889
ATP5C1	ATP synthase subunit gamma;ATP synthase subunit gamma, mitochondrial	B4DL14;P36542-2;P36542	27.2641	27.5471	27.185	27.7432	28.1381		0.282967	0.664408		-0.0791149	0.880196		0.479144	0.614645		0.873997	0.399558		-0.362082	0.454682		0.196177	0.848665		0.591031	0.410357		0.207855		27.019	27.4154	27.3578	27.3828	27.9259	27.3325	27.141	27.2535	27.1604	28.0349	27.3745	27.8203	27.9484	28.1164	28.3494
ATP5D	ATP synthase subunit delta, mitochondrial	P30049	26.3107	26.361	26.1834	26.6117	26.6896		0.0502739	0.744336		-0.127268	0.887948		0.301028	0.699846		0.378911	0.565488		-0.177542	0.727532		0.250754	0.744681		0.328637	0.580022		0.564767		26.2767	26.4073	26.2481	26.425	26.3153	26.3427	26.3307	25.7645	26.4551	27.0505	26.4488	26.3359	26.976	26.8741	26.2188
ATP5J	ATP synthase-coupling factor 6, mitochondrial	A8MUH2;P18859	23.6768	25.6031	24.9168	25.7117	25.8219		1.92636	0.550438		1.24001	0.826418		2.03497	0.614846		2.1451	0.474609		-0.686347	0.719032		0.108605	0.943312		0.218733	0.835222		0.38817		22.1048	25.1946	23.7309	25.4266	26.3427	25.0401	25.767	23.5345	25.4488	25.8504	25.3066	25.9781	26.1095	25.5841	25.772
ATP5O	ATP synthase subunit O, mitochondrial	P48047	28.7668	29.1136	29.0383	29.3048	29.5138		0.346854	0.545638		0.27156	0.834382		0.538025	0.594405		0.747037	0.365193		-0.0752939	0.890416		0.191171	0.81499		0.400183	0.466581		0.259631		28.6964	28.8682	28.7357	28.9031	29.4214	29.0164	29.2399	28.9923	28.8829	29.6268	29.1937	29.094	29.4354	29.7357	29.3704
ATP5S	ATP synthase subunit s, mitochondrial	Q99766;Q8WXQ4	24.069	22.9205	23.5321	23.4739	23.4683		-1.14854	0.553695		-0.536903	0.860425		-0.595099	0.778666		-0.600768	0.550456		0.611635	0.761113		0.553439	0.855638		0.54777	0.697715		0.77879		24.1174	23.7796	24.3101	23.7995	22.6075	22.3545	24.0443	24.3645	22.1876	24.4425	23.7987	22.1806	23.7759	23.7964	22.8325
ATP6AP2	Renin receptor	B7Z9I3;O75787;H0Y750;B7Z1I9;H7C240;H7C3E1;B7Z413	22.8125	24.1093	23.6575	23.7251	24.0472		1.29682	0.577097		0.845032	0.860285		0.912634	0.702429		1.23471	0.551233		-0.451787	0.858063		-0.384185	0.690304		-0.0621077	0.941959		0.670561		24.1055	21.8095	22.5224	23.7594	24.558	24.0105	21.9227	24.4234	24.6264	23.9495	23.3778	23.8481	23.6649	24.2821	24.1946
ATP6V0A2	V-type proton ATPase 116 kDa subunit a isoform 2;V-type proton ATPase subunit a	Q9Y487;Q8TBM3;F5H5F3	24.3389	23.2645	24.7049	23.5084	23.9727		-1.07441	0.422062		0.366053	0.703402		-0.830486	0.613565		-0.366219	0.821422		1.44046	0.105787		0.243922	0.861906		0.708189	0.672839		0.34154		24.5285	24.3239	24.1642	23.3886	23.4687	22.9361	24.7594	24.7234	24.632	23.0753	24.1642	23.2856	24.1488	24.9716	22.7976
ATP6V0D1	V-type proton ATPase subunit d 1	F5GYQ1;P61421;F8WEN9	26.998	27.0849	27.3279	26.9783	27.3769		0.0869503	0.882221		0.329952	0.806143		-0.0196578	0.982605		0.378935	0.395599		0.243001	0.740399		-0.106608	0.919549		0.291985	0.560274		0.634347		27.0084	27.1115	26.8741	26.6865	27.3239	27.2445	27.1984	27.0084	27.7771	27.141	26.5225	27.2714	27.4073	27.391	27.3325
ATP6V1A	V-type proton ATPase catalytic subunit A	B7Z1R5;P38606;B7Z2V6	31.0013	30.9761	31.0498	30.9953	31.0358		-0.0252272	0.960407		0.0484854	0.953898		-0.00601705	0.98937		0.0345408	0.93953		0.0737127	0.459589		0.0192102	0.932568		0.059768	0.665214		0.980053		30.7373	30.947	31.3196	30.9882	31.0283	30.9117	31.0737	31.0673	31.0084	31.0608	30.8901	31.0349	31.1115	31.0283	30.9677
ATP6V1B2	V-type proton ATPase subunit B, brain isoform	P21281;B4DFM5	28.6947	28.5943	28.6695	28.6522	28.6821		-0.100393	0.794256		-0.025128	0.968165		-0.0424671	0.915001		-0.0125732	0.967909		0.0752652	0.771888		0.0579262	0.889394		0.0878201	0.738236		0.935114		28.5718	28.6004	28.9117	28.6831	28.6964	28.4032	28.5898	28.6831	28.7357	28.7357	28.6931	28.5278	28.6527	28.7581	28.6355
ATP6V1C1	V-type proton ATPase subunit C 1	P21283;E7EV59	27.5275	27.5605	27.6502	27.6104	27.6462		0.0329723	0.941285		0.12264	0.85419		0.082852	0.865203		0.118682	0.79678		0.0896676	0.662325		0.0498797	0.908476		0.0857099	0.808373		0.931641		27.6931	27.2714	27.6181	27.6251	27.4314	27.6251	27.5389	27.6663	27.7453	27.7958	27.4314	27.604	27.4862	27.8916	27.5609
ATP6V1D	V-type proton ATPase subunit D	G3V2S6;Q9Y5K8;G3V2V6;H0YJH8	25.707	23.3531	24.4945	25.5903	25.9739		-2.35384	0.547651		-1.21248	0.825605		-0.11668	0.934917		0.266951	0.80601		1.14137	0.72534		2.23716	0.553332		2.6208	0.410262		0.391023		25.3612	26.0547	25.705	24.7182	23.7155	21.6257	22.4279	25.2785	25.7771	26.3325	25.317	25.1214	25.9111	25.3511	26.6595
ATP6V1E1	V-type proton ATPase subunit E 1	P36543;P36543-2;A8MUN4;C9J8H1	27.8353	27.9683	28.1015	27.9727	28.0547		0.133005	0.786039		0.266211	0.825975		0.137404	0.836692		0.219361	0.699797		0.133207	0.805474		0.00439962	0.997963		0.0863565	0.859098		0.880179		27.604	27.7708	28.1312	28.0608	27.7833	28.0608	27.8564	28.4668	27.9814	27.9316	27.7064	28.2803	27.9031	28.3869	27.8741
ATP6V1F	V-type proton ATPase subunit F	Q16864;C9J2K4	24.0445	24.0842	23.6486	23.8986	22.9883		0.0396665	0.923196		-0.395917	0.860643		-0.145948	0.808912		-1.05625	0.461281		-0.435583	0.720084		-0.185615	0.796409		-1.09591	0.404855		0.454703		23.8576	24.2317	24.0443	23.9933	24.0275	24.2317	24.5812	22.8481	23.5165	23.9406	23.5613	24.1938	23.7389	22.3655	22.8604
ATP6V1G1	V-type proton ATPase subunit G 1	O75348	27.1658	27.0767	27.351	27.1171	27.1491		-0.0891266	0.754752		0.185225	0.819366		-0.0487239	0.915497		-0.0167319	0.971574		0.274352	0.360581		0.0404027	0.92002		0.0723947	0.852422		0.663634		27.1312	27.0084	27.3578	27.1604	27.0401	27.0296	27.4473	27.4551	27.1507	27.1507	27.2803	26.9202	26.8973	27.3992	27.1507
ATP6V1H	V-type proton ATPase subunit H	Q9UI12-2;Q9UI12;G3V126	26.5763	26.6196	26.787	26.6366	26.7349		0.0433178	0.955649		0.210655	0.854514		0.0602423	0.943873		0.15854	0.822417		0.167337	0.506622		0.0169245	0.891448		0.115222	0.727691		0.878029		26.1814	26.5075	27.0401	26.6458	26.5536	26.6595	26.8623	26.9089	26.5898	26.6458	26.6458	26.6181	26.8019	26.9089	26.4938
ATP8A1	Phospholipid-transporting ATPase IA	Q9Y2Q0-3;Q9Y2Q0-2;Q9Y2Q0	26.9074	26.9831	27.2177	27.1489	27.3198		0.0757516	0.941132		0.310375	0.842115		0.24151	0.792395		0.412375	0.638411		0.234623	0.486622		0.165758	0.708504		0.336624	0.470088		0.678089		26.4614	27.509	26.7518	26.7771	27.0608	27.1115	27.3153	27.0401	27.2979	26.976	27.2354	27.2354	27.1312	27.611	27.217
ATPAF1	ATP synthase mitochondrial F1 complex assembly factor 1	I3L448;Q5TC12;H0YD21;I3L1W9;A8MRA7;B7Z7D6;B7Z7I6;H0YEW4	25.1068	24.3371	24.0105	24.0425	24.1982		-0.769703	0.549634		-1.0963	0.835241		-1.0643	0.618175		-0.908514	0.63522		-0.326597	0.919357		-0.294598	0.884801		-0.138811	0.951679		0.832952		25.1055	24.8336	25.3811	24.0754	24.0269	24.9089	24.5105	22.0595	25.4614	24.8811	23.1955	24.0508	23.0239	24.0099	25.5609
ATXN10	Ataxin-10	Q9UBB4;E7ESH8;Q9UBB4-2	25.2225	25.1291	25.0383	25.0919	25.0784		-0.0933259	0.716491		-0.184123	0.813766		-0.130606	0.850502		-0.144093	0.597912		-0.0907968	0.73075		-0.0372804	0.969892		-0.0507666	0.866003		0.9186		25.1332	25.2207	25.3135	25.2535	25.1449	24.989	25.1833	24.9043	25.0275	25.1908	24.6486	25.4362	25.0233	24.9584	25.2535
ATXN2L	Ataxin-2-like protein	Q8WWM7;Q8WWM7-6;Q8WWM7-5;Q8WWM7-4;A8K1R6;Q8WWM7-2;Q63ZY4;H3BUF6	23.9821	23.4202	23.4718	22.979	23.5397		-0.561908	0.718381		-0.510319	0.829549		-1.0031	0.627453		-0.442419	0.682111		0.0515893	0.966034		-0.441188	0.809226		0.119489	0.903174		0.580975		24.2821	23.1232	24.5411	24.1795	23.0005	23.0806	23.582	23.4556	23.3778	22.4231	23.5983	22.9157	23.4923	23.5285	23.5983
B2M	Beta-2-microglobulin;Beta-2-microglobulin form pI 5.3	F5H6I0;P61769;H0YLF3	29.698	30.0375	29.9454	30.2646	30.3625		0.339466	0.675625		0.247372	0.828064		0.566504	0.616497		0.664441	0.427049		-0.0920944	0.886789		0.227037	0.836732		0.324975	0.549042		0.414005		29.4073	30.0864	29.6004	29.8504	30.4433	29.8188	29.995	30.0737	29.7676	30.341	29.8593	30.5934	30.4433	30.4134	30.2308
BABAM1	BRISC and BRCA1-A complex member 1	Q9NWV8;H9KV33;Q9NWV8-3;Q9NWV8-2	24.7954	25.3701	24.1878	24.8322	23.889		0.574648	0.612082		-0.607594	0.854844		0.0367915	0.988731		-0.90641	0.508312		-1.18224	0.498129		-0.537856	0.862794		-1.48106	0.297247		0.625213		25.1681	24.141	25.0772	25.4831	25.5955	25.0317	25.0894	22.8092	24.6649	25.8504	25.5014	23.1449	23.7895	23.48	24.3975
BAD	Bcl2-associated agonist of cell death	Q92934;F5GY71	23.4681	24.7231	23.4932	24.213	23.3468		1.25499	0.65773		0.0250963	0.99586		0.744853	0.787228		-0.121319	0.964588		-1.2299	0.276313		-0.510139	0.55374		-1.37631	0.38408		0.564396		25.0233	23.632	21.7492	24.6865	24.7492	24.7338	24.2021	23.0814	23.1962	24.0275	24.4862	24.1253	22.6779	23.2691	24.0935
BAG2	BAG family molecular chaperone regulator 2	O95816;B4DXE2	24.8796	24.9648	24.858	24.8779	25.0273		0.0851892	0.964103		-0.021553	0.985474		-0.00166066	0.997323		0.147702	0.838539		-0.106742	0.95226		-0.0868498	0.968762		0.0625127	0.974415		0.995785		25.1371	24.3645	25.1371	25.9998	24.0275	24.867	24.7796	24.9803	24.8142	24.9672	24.7441	24.9225	25.2891	24.9495	24.8433
BAG5	BAG family molecular chaperone regulator 5	Q9UL15;Q9UL15-2	28.4472	28.5735	28.8495	28.5594	28.6334		0.126254	0.610639		0.402271	0.796645		0.112123	0.778333		0.18614	0.785448		0.276018	0.608015		-0.0141303	0.977649		0.0598863	0.933133		0.733637		28.5969	28.3787	28.3662	28.509	28.6075	28.604	28.4314	28.8887	29.2285	28.3494	28.5898	28.7389	28.5315	29.1288	28.2399
BAG6	Large proline-rich protein BAG6	B0UX83;G3V1Z5;P46379-2;P46379;P46379-3;F8VX53;F8VXY4;E7EMZ4	27.8358	27.8305	28.2547	28.0453	28.1787		-0.00526937	0.994421		0.418894	0.907162		0.209479	0.594571		0.342943	0.395291		0.424164	0.321019		0.214748	0.67373		0.348213	0.44139		0.203909		27.8081	27.8019	27.8973	27.9316	27.5463	28.0137	28.2714	28.2123	28.2803	27.9923	27.9977	28.1459	28.1937	28.2714	28.0711
BANF1	Barrier-to-autointegration factor;Barrier-to-autointegration factor, N-terminally processed	O75531	26.3397	26.8426	26.6772	26.9594	27.0679		0.502925	0.569793		0.3375	0.810492		0.619626	0.620582		0.728148	0.448949		-0.165424	0.65672		0.116701	0.871953		0.225223	0.560227		0.304439		26.0955	26.1095	26.8142	26.5653	26.965	26.9977	26.8264	26.6458	26.5595	26.8623	26.7895	27.2262	27.0813	26.9428	27.1795
BANK1	B-cell scaffold protein with ankyrin repeats	Q8NDB2-3;Q8NDB2-2;Q8NDB2;Q8NDB2-4	26.6832	26.4623	26.81	26.4618	26.5337		-0.220892	0.546756		0.126794	0.842863		-0.22145	0.683343		-0.149536	0.624735		0.347685	0.228509		-0.000558217	0.999769		0.0713558	0.628347		0.324696		26.7389	26.4723	26.8385	26.4692	26.4073	26.5105	26.673	26.8142	26.9428	26.4969	26.2426	26.6458	26.5014	26.632	26.4676
BAX	Apoptosis regulator BAX	Q07812-5;Q07812-8;Q07812;Q07812-2;Q07812-7	26.3238	26.3299	26.2181	26.3628	26.2842		0.0060215	0.975815		-0.105775	0.843246		0.0390066	0.942826		-0.0396875	0.938615		-0.111796	0.719971		0.0329851	0.960668		-0.045709	0.93309		0.962408		26.3239	26.3376	26.3101	26.3049	26.4567	26.228	26.0359	26.1965	26.4218	26.5898	26.4441	26.0547	26.4378	25.8997	26.515
BCAP31	B-cell receptor-associated protein 31	P51572;P51572-2;C9JSP1;C9JQ75;C9J0M4	27.5511	27.1215	27.3334	27.8123	28.2546		-0.429612	0.709814		-0.217632	0.895659		0.261185	0.826835		0.703576	0.550287		0.211981	0.444937		0.690797	0.453531		1.13319	0.130533		0.248538		26.7895	28.1507	27.7129	26.965	27.2979	27.1015	27.4234	27.3325	27.2445	27.9428	27.6798	27.8142	28.1263	28.2714	28.3662
BCAT1	Branched-chain-amino-acid aminotransferase, cytosolic	P54687-4;P54687;F5H5E4;P54687-2;P54687-3	24.1663	24.9474	24.0386	23.4403	23.4781		0.781105	0.608687		-0.127614	0.9711		-0.725911	0.733939		-0.68819	0.674068		-0.908719	0.510486		-1.50702	0.545693		-1.4693	0.413191		0.510927		23.3481	24.558	24.5926	25.4488	24.6595	24.7338	24.8433	24.2021	23.0706	24.5105	23.1254	22.6851	23.3033	24.4362	22.6947
BCL2L1	Bcl-2-like protein 1	Q5QP56;Q9H1R6;Q5TE64;Q07817-2;Q07817-3;Q07817	26.2509	26.6119	26.4713	26.4684	26.5015		0.360966	0.490861		0.220385	0.839028		0.217447	0.770491		0.250526	0.42352		-0.140582	0.682602		-0.14352	0.719218		-0.11044	0.706188		0.32406		26.2225	26.2678	26.2625	26.3975	26.7518	26.6865	26.604	26.2785	26.5315	26.3894	26.452	26.5638	26.4598	26.4692	26.5754
BCR	Breakpoint cluster region protein	P11274;P11274-2;H0Y2V4	25.4751	25.5282	25.5194	25.6398	25.4819		0.0530446	0.939452		0.0442727	0.970196		0.164708	0.747984		0.00677299	0.988592		-0.0087719	0.993318		0.111664	0.846699		-0.0462716	0.946154		0.962014		25.6811	25.1488	25.5955	25.824	25.3307	25.4298	25.6181	25.1833	25.7569	25.6125	25.6153	25.6918	25.726	25.5983	25.1214
BICD2	Protein bicaudal D homolog 2	Q8TD16;Q8TD16-2	27.1456	27.2174	27.4393	27.0341	27.1989		0.0717971	0.870407		0.293704	0.792246		-0.111491	0.80398		0.05329	0.916698		0.221907	0.466223		-0.183288	0.572943		-0.018507	0.968508		0.493133		27.2625	27.3239	26.8504	27.3325	27.1214	27.1984	27.2625	27.632	27.4234	26.9977	27.1507	26.9539	27.141	27.4473	27.0084
BID	BH3-interacting domain death agonist;BH3-interacting domain death agonist p15;BH3-interacting domain death agonist p13;BH3-interacting domain death agonist p11	P55957;P55957-2;P55957-4	30.043	30.259	30.1512	30.3156	30.0116		0.215991	0.548951		0.108143	0.871144		0.272629	0.655135		-0.0314299	0.904166		-0.107848	0.766277		0.0566374	0.917569		-0.247421	0.350191		0.522714		29.8712	30.1842	30.0737	30.1842	30.2308	30.362	30.4234	30.0217	30.0084	30.1724	30.1724	30.6022	30.0864	29.94	30.0084
BIN2	Bridging integrator 2	Q9UBW5;F5H0W4;Q9UBW5-2	32.6741	32.9167	32.7788	33.0106	32.9374		0.242653	0.615405		0.104727	0.862285		0.336505	0.615132		0.263285	0.547524		-0.137925	0.375446		0.0938517	0.827495		0.0206324	0.915566		0.420704		32.4799	32.9557	32.5866	32.8081	32.9899	32.9522	32.7633	32.7593	32.8138	32.8403	32.9983	33.1931	33.0414	32.859	32.9117
BIRC6	Baculoviral IAP repeat-containing protein 6	Q9NR09	25.1958	24.0841	25.3385	24.24	24.1685		-1.11175	0.627583		0.142658	0.850482		-0.95586	0.673561		-1.0273	0.654648		1.25441	0.505693		0.155892	0.969711		0.0844479	0.983081		0.665268		25.1253	24.976	25.4862	25.3376	24.2589	22.6557	25.217	25.3031	25.4953	22.9714	24.7945	24.9539	22.4263	25.2996	24.7796
BLMH	Bleomycin hydrolase	Q13867;E7EMN3	29.3972	29.5519	29.4214	29.3957	29.519		0.15471	0.621487		0.0241311	0.96126		-0.00151698	0.989602		0.121812	0.594861		-0.130579	0.690184		-0.156227	0.672772		-0.0328979	0.924103		0.691359		29.4433	29.3431	29.4053	29.4532	29.7613	29.4413	29.4194	29.2602	29.5844	29.4053	29.3346	29.4473	29.5573	29.3557	29.6441
BLOC1S1	Biogenesis of lysosome-related organelles complex 1 subunit 1	G8JLQ3;P78537-2;P78537	24.4798	23.3736	24.8305	24.0301	24.643		-1.10619	0.591566		0.350638	0.833342		-0.449755	0.865393		0.1632	0.889144		1.45683	0.354691		0.656439	0.860425		1.26939	0.460018		0.593614		24.945	23.8296	24.6649	22.3922	23.3844	24.3443	24.9134	24.8288	24.7492	25.0567	22.3524	24.6811	24.7995	24.0162	25.1135
BLOC1S4	Biogenesis of lysosome-related organelles complex 1 subunit 4	Q9NUP1	23.8897	24.2466	24.5422	23.3296	24.6464		0.35693	0.862497		0.652562	0.844404		-0.560038	0.782738		0.756758	0.657422		0.295632	0.774963		-0.916969	0.585563		0.399827	0.721491		0.469848		24.5225	22.5826	24.5638	23.4649	24.654	24.6209	24.7796	24.2891	24.558	23.7969	23.1796	23.0124	24.2678	24.867	24.8044
BLVRA	Biliverdin reductase A	P53004	29.3733	29.6743	29.5135	29.564	29.4527		0.30096	0.540071		0.140245	0.824514		0.190683	0.675536		0.0793819	0.796475		-0.160715	0.500717		-0.110277	0.797402		-0.221578	0.452397		0.467604		29.393	29.5426	29.1842	29.7146	29.7973	29.5109	29.5969	29.4234	29.5203	29.4765	29.4862	29.7292	29.5536	29.4571	29.3473
BLVRB	Flavin reductase (NADPH)	P30043	26.0653	25.5429	25.3245	25.7669	25.8365		-0.522356	0.589134		-0.740779	0.833956		-0.298391	0.83253		-0.22875	0.740672		-0.218423	0.797838		0.223965	0.901004		0.293606	0.694231		0.65616		25.8504	26.4831	25.8623	25.1055	25.6944	25.8288	24.867	25.7024	25.4041	25.0567	26.5682	25.6757	25.7695	25.5492	26.1908
BNIP2	BCL2/adenovirus E1B 19 kDa protein-interacting protein 2	H7C096;Q12982;Q12982-2	27.9848	27.9398	28.3989	27.9239	27.7704		-0.0449931	0.970635		0.414119	0.826484		-0.0609372	0.96932		-0.214462	0.829299		0.459112	0.487031		-0.0159442	0.990836		-0.169469	0.822992		0.675593		28.0296	27.3494	28.5754	27.9705	27.5165	28.3325	28.1842	28.6216	28.391	27.4938	28.2535	28.0243	27.8264	28.0453	27.4394
BOLA2	BolA-like protein 2	Q9H3K6	27.6683	27.933	27.8434	27.8714	27.8142		0.26466	0.606001		0.175061	0.806853		0.203118	0.728058		0.145855	0.802766		-0.089599	0.850018		-0.0615419	0.935808		-0.118805	0.855104		0.867398		27.5014	27.7518	27.7518	28.1937	27.7195	27.8858	27.6389	27.9428	27.9484	27.5826	27.8858	28.1459	27.5014	27.7195	28.2216
BPNT1	3(2),5-bisphosphate nucleotidase 1	B4DUS9;O95861;C9JI50;O95861-2;A6NF51;F8W1J0	27.153	27.0119	26.9905	27.0822	27.0194		-0.141059	0.803074		-0.162528	0.861446		-0.0708186	0.904965		-0.133588	0.8221		-0.0214685	0.97009		0.0702407	0.871453		0.00747172	0.989769		0.943328		27.341	26.7771	27.341	27.189	27.0084	26.8385	26.8142	27.2714	26.8858	27.1984	26.9977	27.0505	27.2354	26.7518	27.0711
BRAF	Serine/threonine-protein kinase B-raf;RAF proto-oncogene serine/threonine-protein kinase	H7C560;P15056;B4E1N6;H7C155;B4E0X2;P04049;P04049-2	24.1162	23.8904	23.7783	24.1257	24.5882		-0.225802	0.92402		-0.337866	0.930087		0.00948461	0.994787		0.471976	0.744035		-0.112064	0.966071		0.235287	0.934957		0.697778	0.549405		0.907684		24.6096	22.9445	24.7945	23.1312	23.8219	24.7182	24.3712	22.515	24.4488	22.8067	24.6209	24.9495	24.5522	24.5638	24.6486
BRCC3	Lys-63-specific deubiquitinase BRCC36	P46736-3;H9KVA9;P46736-4;P46736-2;P46736	25.6692	24.7509	25.8889	25.9831	26.0957		-0.918246	0.774491		0.219699	0.850288		0.313948	0.757749		0.426545	0.570424		1.13795	0.682556		1.23219	0.773052		1.34479	0.662953		0.686106		25.2317	26.1055	25.6703	26.019	22.3762	25.8576	25.9977	25.867	25.8019	25.5754	26.0691	26.3049	26.2244	25.8385	26.2244
BRE	BRCA1-A complex subunit BRE	Q9NXR7;F8W733;Q9NXR7-4;Q9NXR7-3;Q9NXR7-1;C9J2G0;H7BYD8	26.4552	26.0526	26.4673	26.2744	26.505		-0.402561	0.709521		0.0121206	0.992601		-0.180775	0.851362		0.0498142	0.938734		0.414681	0.572819		0.221786	0.871726		0.452375	0.550153		0.710823		26.6595	25.9672	26.7389	26.4105	25.4583	26.2891	26.3778	26.673	26.3511	25.9825	26.141	26.6998	26.4984	26.4645	26.5522
BRK1	Protein BRICK1	F5H577;Q8WUW1;Q8WUW1-2	27.5508	28.1662	27.7153	27.8027	27.6793		0.615316	0.441631		0.164474	0.888422		0.251822	0.614228		0.128421	0.43473		-0.450843	0.517496		-0.363495	0.546686		-0.486896	0.243498		0.399291		27.509	27.5826	27.5609	28.0137	28.3196	28.1652	28.2262	27.6663	27.2535	27.8858	27.5463	27.976	27.7325	27.6527	27.6527
BROX	BRO1 domain-containing protein BROX	B7Z9G5;Q5VW32;F5GXQ0	27.5608	27.653	27.6783	27.707	27.6396		0.0922476	0.817171		0.117506	0.823617		0.146243	0.800624		0.0787684	0.833721		0.0252584	0.951204		0.0539958	0.944448		-0.0134792	0.981471		0.960081		27.5315	27.4314	27.7195	27.8682	27.6595	27.4314	27.5898	27.7453	27.6998	27.5536	27.4862	28.0813	27.5315	27.5014	27.8858
BSDC1	BSD domain-containing protein 1	B4DM89;C9JB13;Q9NW68-2;Q9NW68;Q9NW68-8;Q9NW68-7;Q9NW68-3;Q9NW68-5;Q9NW68-9	24.1317	24.7104	24.8986	23.5789	24.3592		0.57865	0.673951		0.766925	0.810984		-0.552785	0.839425		0.227544	0.852456		0.188274	0.775318		-1.13144	0.688276		-0.351106	0.699693		0.598943		23.41	24.8811	24.104	25.2021	24.4551	24.4738	24.918	24.7129	25.065	24.6153	24.1946	21.9269	24.7024	24.5105	23.8648
BSG	Basigin	I3L4S8;I3NI00;P35613-2;P35613;I3L1R4;I3L192;P35613-3;P35613-4;I3L4L2	26.3411	26.3645	26.767	26.8444	26.9557		0.0233129	0.976933		0.425847	0.807185		0.503295	0.614542		0.614552	0.521973		0.402534	0.32132		0.479982	0.53062		0.591239	0.424123		0.338637		26.0233	26.8264	26.1738	26.4346	26.5433	26.1154	26.8623	26.6998	26.7389	26.965	26.6595	26.9089	26.6998	27.341	26.8264
BTBD11	Ankyrin repeat and BTB/POZ domain-containing protein BTBD11	A6QL63-3;A6QL63;A6QL63-2;E9PHS4	25.1729	23.0516	24.6295	23.7745	23.3713		-2.12124	0.465146		-0.543356	0.744869		-1.39843	0.0260326		-1.80159	0.435103		1.57789	0.217434		0.722812	0.546618		0.319652	0.835448		0.182618		25.1984	25.239	25.0813	23.2072	22.5437	23.4041	24.4984	24.9628	24.4274	23.7695	23.8093	23.7445	22.3464	24.239	23.5285
BTK	Tyrosine-protein kinase BTK	Q06187;Q5JY90	31.0857	31.1618	31.0363	31.2052	31.148		0.0761388	0.787861		-0.0493679	0.911237		0.119553	0.778939		0.0622953	0.772754		-0.125507	0.547027		0.0434138	0.920255		-0.0138435	0.936407		0.730039		30.9259	31.1177	31.2135	31.0608	31.1544	31.2703	31.0673	31.13	30.9117	31.0283	31.1842	31.4032	31.1724	31.1053	31.1664
BZW1	Basic leucine zipper and W2 domain-containing protein 1	Q7L1Q6;Q7L1Q6-4;Q7L1Q6-3;Q7L1Q6-2;C9IZ80	27.8092	27.7911	27.8899	27.8918	27.7082		-0.0180925	0.949359		0.0807336	0.871704		0.0826111	0.793513		-0.100968	0.653671		0.0988261	0.647281		0.100704	0.689913		-0.0828756	0.429865		0.585139		27.6595	27.8142	27.9539	27.7895	27.8385	27.7453	27.8081	27.7958	28.066	27.7771	27.8741	28.0243	27.726	27.7325	27.6663
BZW2	Basic leucine zipper and W2 domain-containing protein 2	E7ETZ4;Q9Y6E2;B5MCE7;Q75MG1;B5MCH7	26.4411	26.5501	26.7663	26.7675	26.5063		0.109011	0.877242		0.325178	0.798803		0.326354	0.657825		0.0652275	0.903553		0.216167	0.594624		0.217343	0.67275		-0.0437832	0.907902		0.558436		26.5898	26.0338	26.6998	26.8264	26.3256	26.4984	26.9539	26.7129	26.632	26.726	26.8504	26.726	26.4645	26.4892	26.5653
C10orf11	Leucine-rich repeat-containing protein C10orf11	A6NG64;Q9H2I8	24.8042	24.5063	24.8366	24.0147	23.7971		-0.297877	0.721755		0.0323868	0.982543		-0.789556	0.736025		-1.00716	0.505442		0.330264	0.510736		-0.491679	0.853174		-0.709283	0.480478		0.558555		25.3307	24.417	24.6649	24.2244	24.7543	24.5404	24.8433	25.0854	24.5812	24.5165	24.8764	22.651	24.2317	23.066	24.0935
C10orf54	Platelet receptor Gi24	H0Y2M9;Q9H7M9	26.5198	26.964	26.2935	26.4427	26.5977		0.444201	0.815501		-0.22626	0.940667		-0.0771224	0.979053		0.0779324	0.965495		-0.67046	0.354955		-0.521323	0.582137		-0.366268	0.560756		0.809718		26.2714	27.7895	25.4984	27.0505	27.3325	26.509	26.2926	26.4567	26.1312	26.6595	26.2661	26.4024	26.6998	26.4614	26.632
C10orf76	UPF0668 protein C10orf76	Q5T2E6	24.7538	24.9356	25.2252	24.8892	25.1507		0.181775	0.856535		0.471412	0.8258		0.135394	0.890248		0.39692	0.673057		0.289637	0.662554		-0.0463804	0.941712		0.215145	0.731776		0.717895		24.5165	24.3376	25.4073	24.6649	25.2607	24.8811	24.8481	25.1984	25.6292	24.9672	24.824	24.8764	24.8623	25.4645	25.1253
C11orf54	Ester hydrolase C11orf54	Q9H0W9-2;Q9H0W9;E9PJU8;E9PQS1;Q9H0W9-4;Q9H0W9-3;E9PPB5	27.3716	27.0344	27.3146	27.1578	27.2225		-0.337132	0.591114		-0.0569534	0.940315		-0.213815	0.715088		-0.149073	0.827779		0.280179	0.424047		0.123317	0.815148		0.188059	0.76521		0.703894		27.5754	27.0608	27.4785	27.1604	27.141	26.8019	27.1795	27.341	27.4234	27.141	27.0084	27.3239	27.1312	27.6389	26.8973
C11orf68	UPF0696 protein C11orf68	Q9H3H3;Q9H3H3-2;Q9H3H3-3	24.6515	24.4949	24.6295	23.9529	23.4934		-0.156616	0.646972		-0.0220896	0.982805		-0.698625	0.770773		-1.1581	0.6219		0.134526	0.703291		-0.542009	0.848167		-1.00149	0.671478		0.70036		24.4738	24.6376	24.8433	24.5344	24.5463	24.4041	24.8764	24.632	24.3799	24.7945	22.449	24.6153	21.7032	24.0854	24.6918
C11orf73	Protein Hikeshi	Q53FT3;E9PPG8	26.2264	25.1079	25.3758	26.0455	26.1823		-1.11852	0.662044		-0.850584	0.806674		-0.180894	0.713357		-0.0440788	0.930919		0.267934	0.933826		0.937624	0.760712		1.07444	0.638547		0.648886		26.1507	26.1623	26.3662	25.6838	23.39	26.2499	25.5492	24.2121	26.3662	25.8191	26.0443	26.2732	25.8433	26.4831	26.2207
C12orf10	UPF0160 protein MYG1, mitochondrial	F8VR84;Q9HB07;F8VQQ3;F5H641	24.4778	24.2455	24.5391	24.1175	25.0689		-0.232232	0.924418		0.0612977	0.98924		-0.360312	0.878144		0.591137	0.722799		0.29353	0.902816		-0.12808	0.957863		0.823369	0.478949		0.847566		24.8997	25.3376	23.1961	24.6264	23.3712	24.7389	25.2021	25.3066	23.1085	25.0233	23.4548	23.8743	24.824	25.2535	25.1293
C14orf166	UPF0568 protein C14orf166	Q9Y224;G3V4C6	27.0598	27.3049	27.204	27.0784	27.3785		0.245047	0.661525		0.144175	0.895996		0.0185572	0.981317		0.318688	0.621328		-0.100872	0.871638		-0.22649	0.547656		0.0736408	0.87271		0.713175		27.2535	26.6998	27.2262	27.3066	27.217	27.391	27.4314	26.7895	27.391	27.2077	27.0084	27.019	27.0296	27.5969	27.509
C15orf52	Uncharacterized protein C15orf52	Q6ZUT6-2;Q6ZUT6-4;Q6ZUT6	24.5278	25.1333	23.8964	24.9932	23.9432		0.605482	0.609322		-0.631382	0.827445		0.465406	0.725443		-0.584641	0.797717		-1.23686	0.359135		-0.140076	0.910604		-1.19012	0.57947		0.561595		24.7077	24.976	23.8998	25.2996	24.6865	25.4138	24.7182	23.2529	23.7182	24.6264	25.4862	24.867	25.0732	22.3075	24.4488
C16orf62	UPF0505 protein C16orf62	Q7Z3J2;G5E9I3;E7EWW0;F5H7K1;H3BVG8;C9J7I2;Q7Z3J2-2	25.2325	23.698	25.3854	25.2389	25.2413		-1.53448	0.552594		0.152885	0.889194		0.00635974	0.991847		0.00884883	0.988417		1.68737	0.395989		1.54084	0.58669		1.54333	0.463345		0.322689		25.7619	24.8997	25.0359	23.9256	22.278	24.8904	25.4138	25.3745	25.3679	24.9933	25.1449	25.5783	25.2856	25.341	25.0975
C17orf59	Uncharacterized protein C17orf59	Q96GS4	24.8305	22.8634	24.4891	24.9054	24.6214		-1.96712	0.55492		-0.341405	0.895673		0.07492	0.905101		-0.209092	0.560549		1.62572	0.510225		2.04204	0.553238		1.75803	0.451977		0.342381		24.7846	24.7441	24.9628	24.4328	21.7012	22.4561	23.196	25.2021	25.0691	24.654	24.7695	25.2926	24.4362	24.604	24.824
C17orf75	Protein Njmu-R1	Q9HAS0	24.4188	23.7928	24.8548	24.0299	24.3664		-0.625949	0.753496		0.43604	0.675394		-0.388855	0.78022		-0.0523313	0.880165		1.06199	0.559788		0.237094	0.940903		0.573617	0.769813		0.678752		24.3376	24.3376	24.5812	24.824	22.2867	24.2678	24.8764	24.9803	24.7077	24.4298	23.0903	24.5696	24.4923	24.1332	24.4738
C19orf25	UPF0449 protein C19orf25	Q9UFG5;E7EP72;Q9UFG5-2	23.9601	24.4345	23.6701	23.5017	23.5776		0.474359	0.716226		-0.290045	0.87632		-0.458419	0.841935		-0.382494	0.761352		-0.764404	0.546336		-0.932778	0.751184		-0.856853	0.560486		0.787077		24.2096	24.2411	23.4298	24.7389	24.8997	23.6649	23.0515	23.6092	24.3496	22.0923	23.7534	24.6595	22.6981	23.9495	24.0854
C19orf66	UPF0515 protein C19orf66	Q9NUL5-2;Q9NUL5	20.7363	22.3367	19.5159	21.2227	23.1849		1.60037	0.615191		-1.22047	0.67548		0.4864	0.890419		2.44855	0.37083		-2.82084	0.351464		-1.11397	0.850742		0.848173	0.765773		0.312838		21.1435	20.3133	20.7522	20.2816	23.8108	22.9178	19.2741	19.9363	19.3372	19.9978	20.1159	23.5545	22.8807	23.8829	22.7911
C1orf123	UPF0587 protein C1orf123	Q9NWV4	27.7014	28.1769	27.7543	28.3916	27.9955		0.475433	0.666988		0.0528997	0.973178		0.690196	0.574314		0.294029	0.725224		-0.422534	0.674285		0.214762	0.871715		-0.181405	0.865893		0.599113		27.632	28.0813	27.391	28.7162	28.2535	27.5609	28.2803	27.4073	27.5754	28.189	28.3367	28.6492	27.8203	27.6458	28.5203
C1orf198	Uncharacterized protein C1orf198	Q9H425;G5EA08;A8K8R8;E5RI90	27.9189	28.1433	28.196	28.2875	28.2215		0.22441	0.64661		0.277096	0.817707		0.368654	0.613038		0.302616	0.549653		0.0526867	0.897639		0.144245	0.584315		0.0782064	0.615874		0.499562		27.8916	27.6527	28.2123	28.0762	28.2077	28.1459	28.1459	27.9869	28.4551	28.1842	28.267	28.4113	28.249	28.2891	28.1263
C1orf50	Uncharacterized protein C1orf50	Q9BV19	23.7044	24.2478	23.3647	24.2561	23.8159		0.543364	0.547058		-0.339722	0.889782		0.551692	0.613519		0.111433	0.898976		-0.883086	0.50471		0.00832812	0.98974		-0.431931	0.536108		0.526998		23.7077	24.1095	23.2961	24.1332	24.1488	24.4614	23.9406	22.2865	23.867	24.0275	24.3239	24.417	23.9043	23.3412	24.2021
C1QBP	Complement component 1 Q subcomponent-binding protein, mitochondrial	Q07021;I3L3Q7;I3L3B0	26.1061	24.3627	26.6106	27.7446	27.7731		-1.74343	0.764669		0.504466	0.961508		1.63843	0.726243		1.66691	0.655136		2.24789	0.657874		3.38186	0.583965		3.41034	0.461255		0.571426		27.5969	27.5165	23.205	22.5649	27.8081	22.7152	27.8504	28.0349	23.9465	27.7325	27.509	27.9923	27.5609	28.0453	27.7129
C20orf27	UPF0687 protein C20orf27	Q9GZN8;Q9GZN8-2	24.0214	25.8717	26.1706	24.3047	23.9074		1.8504	0.60176		2.14925	0.827207		0.283375	0.952973		-0.113902	0.973799		0.298843	0.477121		-1.56703	0.618911		-1.9643	0.43984		0.46195		22.4803	23.4196	26.1642	25.5812	26.0691	25.965	26.0254	26.3222	26.1642	25.7182	24.5498	22.6462	24.1894	25.1757	22.3572
C21orf33	ES1 protein homolog, mitochondrial	P30042;H7C1F6;H7C2G3;H7C455;P30042-2	26.9227	27.3858	27.016	27.3039	27.3855		0.46315	0.548876		0.0933386	0.921887		0.381256	0.57353		0.462863	0.411748		-0.369811	0.619343		-0.0818939	0.932958		-0.000286738	1		0.502849		27.0084	26.8973	26.8623	27.4629	27.7518	26.9428	27.2979	26.5898	27.1604	27.2714	27.5389	27.1015	27.2077	27.4938	27.4551
C2CD5	C2 domain-containing protein 5	Q86YS7;Q86YS7-2;B4DRN7;F5H2A1;F5H5R1;F5H3N1	27.7997	27.9522	28.0143	27.9975	27.9086		0.152531	0.744186		0.214629	0.831898		0.197792	0.724061		0.108915	0.859238		0.0620975	0.887125		0.0452607	0.911571		-0.043616	0.942566		0.884432		28.0137	27.4938	27.8916	28.1263	27.8799	27.8504	28.1263	27.7708	28.1459	27.8564	28.0296	28.1065	27.8504	28.2714	27.604
C2orf88	Small membrane A-kinase anchor protein	Q9BSF0	26.8466	26.8872	26.7086	26.8968	27.2592		0.0405992	0.977371		-0.137923	0.951015		0.0502644	0.978811		0.412678	0.696232		-0.178522	0.872972		0.00966517	0.996966		0.372079	0.651531		0.823841		26.3811	27.6663	26.4923	26.2767	27.1312	27.2535	27.1507	26.604	26.3712	26.5682	27.3578	26.7645	27.1214	27.217	27.4394
C3	Complement C3;Complement C3 beta chain;C3-beta-c;Complement C3 alpha chain;C3a anaphylatoxin;Acylation stimulating protein;Complement C3b alpha chain;Complement C3c alpha chain fragment 1;Complement C3dg fragment;Complement C3g fragment;Complement C3d fragment;Complement C3f fragment;Complement C3c alpha chain fragment 2	P01024;B4E216	30.4424	30.4935	30.4922	30.2383	30.2642		0.0511214	0.832229		0.0498002	0.905186		-0.204172	0.62439		-0.178267	0.566451		-0.00132116	0.998472		-0.255294	0.585295		-0.229389	0.504104		0.479974		30.3724	30.4629	30.4919	30.3303	30.5481	30.6022	30.4433	30.362	30.6714	30.0737	30.2077	30.4334	30.0479	30.393	30.3515
C3orf58	Deleted in autism protein 1	Q8NDZ4	24.4256	24.5914	24.7171	24.2521	24.4301		0.165846	0.554544		0.291527	0.595341		-0.173438	0.795831		0.00454966	0.982325		0.125682	0.605922		-0.339284	0.687994		-0.161296	0.564623		0.461327		24.4234	24.4298	24.4234	24.5225	24.7594	24.4923	24.6649	24.6431	24.8433	23.8157	24.3031	24.6376	24.391	24.5754	24.3239
C4A;C4B	Complement C4-A;Complement C4 beta chain;Complement C4-A alpha chain;C4a anaphylatoxin;C4b-A;C4d-A;Complement C4 gamma chain;Complement C4-B;Complement C4 beta chain;Complement C4-B alpha chain;C4a anaphylatoxin;C4b-B;C4d-B;Complement C4 gamma chain	B0UZ83;Q5JNX2;B0V2C8;Q6U2E9;A2BHY4;F8VZD8;F8VW91;F8VSI2;P0C0L5;P0C0L4;F8VX64;F8VNV9;F5GXS0;A6H8M8	27.1461	27.1569	27.2199	27.0046	26.9367		0.0107231	0.989604		0.0737553	0.968232		-0.141527	0.877579		-0.209498	0.739076		0.0630322	0.933764		-0.15225	0.852181		-0.220221	0.472657		0.886164		26.6998	27.4234	27.3153	27.1984	27.141	27.1312	27.5463	26.7389	27.3745	27.0296	26.6181	27.3662	27.17	26.7895	26.8504
C4BPA	C4b-binding protein alpha chain	P04003	22.7677	23.9739	23.6266	23.353	23.19		1.20617	0.588921		0	0		0	0		0	0		-0.347297	0.840804		-0.62085	0.772289		-0.783829	0.682736		0.599468		23.0683	22.0465	23.1882	23.9065	25.0275	22.9876	23.7715	23.1666	23.9416	23.3438	23.5931	23.1222	23.9674	22.3323	23.2704
C4orf33	UPF0462 protein C4orf33	Q8N1A6;D6RIT3	24.142	25.5426	24.6887	24.2244	23.7604		1.40065	0.527574		0.54673	0.83299		0.0824165	0.965938		-0.381528	0.858839		-0.853918	0.278868		-1.31823	0.505863		-1.78218	0.430146		0.369954		25.0608	23.9225	23.4425	25.3778	25.8623	25.3877	25.0608	24.5754	24.4298	24.1253	23.9495	24.5983	24.4923	24.4488	22.3402
C5	Complement C5;Complement C5 beta chain;Complement C5 alpha chain;C5a anaphylatoxin;Complement C5 alpha chain	P01031;H0Y4U2	25.3426	25.3599	25.4847	25.3458	24.9731		0.0172971	0.990001		0.142085	0.939507		0.00317764	0.99586		-0.369523	0.773015		0.124788	0.868982		-0.0141195	0.982862		-0.38682	0.70602		0.823676		24.8481	25.1565	26.0233	25.6348	25.2317	25.2133	25.2785	25.2463	25.9293	25.1833	25.3376	25.5165	25.2096	24.239	25.4707
C5orf51	UPF0600 protein C5orf51	A6NDU8	27.2752	26.9861	27.1395	27.1976	27.1997		-0.289064	0.543425		-0.135697	0.851192		-0.077596	0.839071		-0.0754484	0.840766		0.153367	0.559495		0.211468	0.488655		0.213615	0.438444		0.539489		27.4073	27.019	27.3992	27.019	26.9202	27.019	26.976	27.1015	27.341	27.1795	27.1507	27.2625	27.2077	27.341	27.0505
C7orf25	UPF0415 protein C7orf25	Q9BPX7	25.6942	25.1367	25.6483	25.9812	25.4656		-0.557546	0.461436		-0.0459016	0.964168		0.286957	0.615991		-0.228633	0.50329		0.511644	0.354493		0.844503	0.474747		0.328913	0.376948		0.198003		25.7569	25.5165	25.8093	25.2996	25.1214	24.989	25.452	25.4953	25.9977	25.8576	25.8858	26.2002	25.4551	25.5638	25.3778
C8A	Complement component C8 alpha chain	P07357	23.4462	23.5897	24.081	23.5708	22.2652		0.143518	0.948549		0.634831	0.840701		0.124678	0.96802		0	0		0.491313	0.744366		-0.0188408	0.999579		-1.32448	0.605706		0.594545		23.9394	22.9467	23.4524	22.3392	24.1763	24.2535	24.0854	24.1642	23.9933	24.019	22.1105	24.583	23.7035	20.9178	22.1743
C9orf64	UPF0553 protein C9orf64	Q5T6V5;Q5T6V7	25.3717	24.8734	25.4075	25.0962	24.9806		-0.498312	0.548661		0.0357958	0.940714		-0.275555	0.599678		-0.391119	0.446592		0.534108	0.400029		0.222757	0.794006		0.107193	0.868439		0.320764		25.4645	25.2499	25.4008	25.3342	24.6376	24.6486	25.5374	25.4425	25.2426	25.0105	25.1253	25.1527	24.9539	25.1984	24.7895
C9orf89	Bcl10-interacting CARD protein	Q96LW7-2;Q96LW7	25.0009	23.479	25.0555	24.871	25.1073		-1.52191	0.58968		0.0545953	0.960906		-0.129889	0.837014		0.106439	0.87957		1.5765	0.458562		1.39202	0.636125		1.62835	0.469831		0.358222		24.9089	24.6865	25.4073	22.4861	22.7713	25.1795	25.0732	25.1527	24.9406	24.8093	24.9225	24.8811	25.0526	25.4551	24.8142
CA1	Carbonic anhydrase 1	P00915;E5RH81;E5RHP7;E5RIF9;E5RG43;E5RFE7;E5RGU8;E5RFL2;H0YBE2	26.7181	25.8679	25.168	25.6146	23.6122		-0.850194	0.674617		-1.55009	0.824572		-1.10345	0.65863		-3.10587	0.461256		-0.699899	0.827885		-0.253257	0.908746		-2.25568	0.467552		0.453098		25.6458	27.611	26.8973	26.4394	25.002	26.1623	25.792	22.973	26.7389	26.3762	25.0443	25.4234	25.5492	23.1504	22.1369
CA13	Carbonic anhydrase 13	Q8N1Q1	27.7745	28.1813	27.803	27.9303	27.9538		0.406773	0.621375		0.0284913	0.983397		0.155739	0.839548		0.179245	0.832899		-0.378281	0.423731		-0.251033	0.627189		-0.227528	0.727649		0.718435		27.976	28.0762	27.2714	28.4274	28.066	28.0505	28.0557	27.7708	27.5826	28.0243	27.7581	28.0084	28.3704	27.611	27.8799
CA2	Carbonic anhydrase 2	P00918	31.5363	32.0034	31.9547	31.846	31.92		0.467147	0.616682		0.418371	0.797421		0.30968	0.682278		0.383747	0.550773		-0.0487754	0.954384		-0.157466	0.863724		-0.0833995	0.89732		0.613556		31.2759	31.9046	31.4284	31.5934	32.0316	32.3854	31.8157	31.7613	32.2869	31.901	31.6285	32.0084	31.781	31.8645	32.1146
CAB39	Calcium-binding protein 39	Q9Y376	29.083	28.7954	29.018	28.7688	28.9011		-0.28755	0.660188		-0.0649802	0.904408		-0.314185	0.609027		-0.181894	0.550404		0.22257	0.6705		-0.0266355	0.977096		0.105656	0.841107		0.605542		29.2467	28.9259	29.0762	29.1984	28.5352	28.6527	28.8415	29.1337	29.0788	28.8324	28.5536	28.9202	28.9622	28.9146	28.8264
CACYBP	Calcyclin-binding protein	Q9HB71;Q5R370;B3KSF1	28.0156	28.007	27.6751	28.0033	27.8507		-0.00855954	0.987076		-0.340506	0.671844		-0.0123425	0.981432		-0.164931	0.669617		-0.331947	0.375508		-0.00378291	0.999084		-0.156371	0.745336		0.484918		27.9595	27.9031	28.1842	27.8081	28.2759	27.9372	27.6663	27.7064	27.6527	27.7771	28.1312	28.1015	27.6798	28.1015	27.7708
CAD	CAD protein;Glutamine-dependent carbamoyl-phosphate synthase;Aspartate carbamoyltransferase;Dihydroorotase	F8VPD4;P27708	28.4467	28.3411	28.519	28.545	28.5197		-0.105542	0.660623		0.0722713	0.833198		0.0983543	0.711296		0.0729796	0.693958		0.177813	0.379069		0.203896	0.555343		0.178521	0.447791		0.43893		28.3828	28.4073	28.5499	28.4113	28.217	28.3951	28.604	28.4938	28.4591	28.5826	28.4274	28.6251	28.4154	28.579	28.5646
CALCOCO1	Calcium-binding and coiled-coil domain-containing protein 1	Q9P1Z2-2;Q9P1Z2-3;Q9P1Z2;E7EWT6;Q9P1Z2-4;E9PGB0	28.1767	28.2315	27.9769	28.1597	27.9537		0.0548178	0.94153		-0.199783	0.863785		-0.0169347	0.98157		-0.222994	0.667065		-0.254601	0.63102		-0.0717525	0.89372		-0.277812	0.46153		0.737584		28.2847	28.4433	27.8019	28.0914	28.4668	28.1361	28.2847	28.0349	27.611	28.3109	28.003	28.1652	27.8564	27.9031	28.1015
CALD1	Caldesmon	Q05682-4;Q05682-2;Q05682;Q05682-6;C9J813	33.2071	33.2711	32.9285	33.1111	32.884		0.0640221	0.483798		-0.278561	0.428957		-0.0960363	0.748019		-0.323148	0.879494		-0.342583	0.107724		-0.160058	0.629785		-0.38717	0.097416		0.109638		33.2193	33.2193	33.1827	33.2478	33.2897	33.2759	32.9814	32.9452	32.859	32.9967	33.3033	33.0332	32.8627	32.8422	32.947
CALM1	Calmodulin	H0Y7A7;P62158;E7ETZ0;E7EMB3;Q96HY3;G3V361	33.8668	33.7782	33.633	33.8907	33.9283		-0.0885913	0.843342		-0.233785	0.807044		0.0239499	0.95317		0.061512	0.859502		-0.145194	0.627883		0.112541	0.800964		0.150103	0.688285		0.502635		33.6735	34.0753	33.8516	33.8516	33.9417	33.5412	33.7047	33.5527	33.6415	33.8328	33.933	33.9063	33.8974	33.8042	34.0832
CALR	Calreticulin	P27797	32.4314	32.9571	32.586	32.866	32.7258		0.525678	0.459618		0.154613	0.848834		0.434605	0.579069		0.294398	0.544705		-0.371065	0.348531		-0.0910734	0.801544		-0.23128	0.471035		0.295687		32.2365	32.6394	32.4184	32.8497	33.0266	32.995	32.7454	32.333	32.6798	32.717	32.8627	33.0184	32.8774	32.5132	32.7868
CALU	Calumenin	O43852-3;O43852;F5H4F5;F5H1Q9;H0Y875	29.6322	29.7843	29.6688	29.7602	29.817		0.152116	0.736484		0.0365334	0.966907		0.127926	0.781749		0.184816	0.668078		-0.115582	0.499815		-0.0241896	0.919731		0.0327009	0.887602		0.699331		29.3599	29.9117	29.6251	29.6646	29.7911	29.8973	29.6865	29.6251	29.6948	29.7597	29.7786	29.7421	29.94	29.7771	29.7341
CAMK1	Calcium/calmodulin-dependent protein kinase type 1	Q14012;H7C071	29.9009	30.2189	30.0248	30.2672	30.2114		0.317969	0.402477		0.123855	0.805274		0.366241	0.80778		0.310537	0.4416		-0.194114	0.243001		0.0482718	0.787501		-0.0074323	0.976417		0.182833		29.8096	29.9117	29.9814	30.2647	30.2077	30.1842	30.1115	29.9814	29.9814	30.2869	30.1842	30.3303	30.2647	30.0608	30.3088
CAMK2B	Calcium/calmodulin-dependent protein kinase type II subunit gamma;Calcium/calmodulin-dependent protein kinase type II subunit beta	Q5SWX3;Q13555-10;Q13555-5;Q13555-4;Q13555-3;Q13555-7;Q13555-9;Q13555-2;Q13555-8;Q13555;Q13555-6;Q8WU40;H0Y6G2;Q13554-7;Q13554-4;Q13554-6;Q13554-3;Q13554-8;Q13554-5;Q13554-2;Q13554	26.8229	26.6733	27.0381	27.0651	26.9524		-0.149563	0.713654		0.215228	0.796497		0.242238	0.644492		0.129485	0.738368		0.364791	0.244344		0.391802	0.541566		0.279048	0.439268		0.322819		26.8142	27.0505	26.604	26.7518	26.7518	26.5165	26.965	27.0084	27.141	27.1214	26.9428	27.1312	26.7771	27.0296	27.0505
CAMK2D	Calcium/calmodulin-dependent protein kinase type II subunit delta	D6R938;E9PBG7;E9PF82;Q13557-8;Q13557-12;Q13557-10;Q13557;Q13557-6;Q13557-11;Q13557-9;Q13557-5;Q13557-3;Q13557-4	24.9852	25.0367	24.6765	24.0094	25.2191		0.0515175	0.979961		-0.308608	0.940281		-0.975722	0.795356		0.233904	0.894871		-0.360125	0.826436		-1.02724	0.801742		0.182386	0.720523		0.836826		23.6088	25.6181	25.7286	25.1527	25.2133	24.7441	25.2891	25.2643	23.4762	25.0484	21.7084	25.2714	25.0233	25.1601	25.4738
CAND1	Cullin-associated NEDD8-dissociated protein 1	Q86VP6;Q86VP6-2	31.154	31.1527	31.3033	31.2452	31.2613		-0.00128746	0.997811		0.149265	0.406788		0.0911738	0.731646		0.107257	0.515476		0.150552	0.306336		0.0924613	0.786474		0.108545	0.526072		0.484003		31.1115	31.1664	31.1842	31.1177	31.0927	31.2478	31.2869	31.3142	31.3088	31.1422	31.1901	31.4032	31.3357	31.1724	31.2759
CANX	Calnexin	P27824;B4E2T8;H0Y9Q7	28.4243	28.8934	29.0048	29.4489	29.7099		0.469072	0.754206		0.580502	0.832813		1.02461	0.62057		1.28558	0.472655		0.11143	0.895299		0.555541	0.570221		0.816513	0.387175		0.326501		27.4862	29.3044	28.4823	28.3828	29.099	29.1984	29.258	28.8504	28.906	29.4254	29.4919	29.4294	29.4727	29.7771	29.8799
CAP1	Adenylyl cyclase-associated protein 1	Q01518;F5H6Z3	33.6712	33.7408	33.7768	33.6687	33.6414		0.0696576	0.791488		0.105651	0.83394		-0.00242233	0.992566		-0.0297445	0.899372		0.0359929	0.832224		-0.07208	0.707077		-0.0994021	0.43288		0.636931		33.8516	33.5641	33.5978	33.6944	33.8233	33.7047	33.8422	33.684	33.8042	33.6944	33.5866	33.7252	33.6415	33.6198	33.6629
CAPN1	Calpain-1 catalytic subunit	P07384;H7C5Z3	33.0147	32.995	33.1065	33.0645	33.0569		-0.0197271	0.952931		0.091774	0.85051		0.0498136	0.849095		0.042263	0.859168		0.111501	0.560413		0.0695407	0.679266		0.0619901	0.707302		0.807842		33.1544	32.8516	33.0381	32.9557	33.0927	32.9365	33.2193	33.1068	32.9933	33.0512	33.0528	33.0896	33.0927	33.1052	32.9729
CAPN2	Calpain-2 catalytic subunit	H0Y323;P17655	27.875	27.4553	27.5988	27.5862	27.7927		-0.419687	0.612745		-0.276264	0.832386		-0.288836	0.630462		-0.0823542	0.721953		0.143422	0.843371		0.130851	0.902892		0.337332	0.603353		0.565173		27.7708	27.8142	28.0401	26.9539	27.604	27.8081	27.4785	27.6181	27.6998	27.3239	27.6389	27.7958	27.8682	27.7645	27.7453
CAPN7	Calpain-7	Q9Y6W3	24.4134	24.6362	23.8161	23.9387	22.9591		0.222825	0.713803		-0.597335	0.807775		-0.474724	0.664467		-1.45437	0.477601		-0.820161	0.435686		-0.69755	0.540751		-1.6772	0.395058		0.321748		24.6486	24.5812	24.0105	24.8191	24.6096	24.48	24.1341	24.2961	23.018	23.5025	24.3578	23.9558	24.1135	22.1763	22.5873
CAPNS1	Calpain small subunit 1	P04632	31.6154	31.6983	31.9351	31.6352	31.7826		0.0828896	0.930074		0.319664	0.80612		0.0197334	0.981153		0.167154	0.743274		0.236774	0.676279		-0.0631561	0.934762		0.0842648	0.879097		0.724446		31.8459	31.2077	31.7927	31.5527	32.1239	31.4184	31.8682	31.7888	32.1483	31.6798	31.6458	31.5799	31.8347	31.7088	31.8042
CAPZA1	F-actin-capping protein subunit alpha-1	P52907	31.0571	31.5224	31.1676	31.6285	31.5999		0.465359	0.528234		0.110536	0.864287		0.571395	0.614223		0.542803	0.446875		-0.354823	0.285777		0.106035	0.907964		0.0774434	0.78672		0.300506		30.7771	31.2703	31.1239	31.717	31.4727	31.3776	31.2193	31.1783	31.1053	31.2365	31.6372	32.0117	31.5799	31.5109	31.7088
CAPZA2	F-actin-capping protein subunit alpha-2	P47755;F8W9N7;B4DE01	31.8562	32.274	32.1852	32.3169	32.2732		0.417828	0.481888		0.329093	0.82355		0.460747	0.5945		0.417055	0.421651		-0.0887349	0.71979		0.0429192	0.941015		-0.000773112	0.997838		0.293129		31.6714	32.0512	31.8459	32.4359	32.2048	32.1813	32.1239	32.1177	32.3142	32.1783	32.1813	32.5911	32.3061	32.2048	32.3088
CAPZB	F-actin-capping protein subunit beta	P47756-2;B1AK87;B1AK88;E7EQ40	32.8044	33.0613	32.9518	32.9723	33.1075		0.256852	0.483574		0.147326	0.824668		0.167895	0.656726		0.303101	0.45182		-0.109526	0.600853		-0.0889575	0.725026		0.0462481	0.797329		0.382109		32.6458	32.8828	32.8847	33.0657	33.0785	33.0398	33.1146	32.9365	32.8042	32.978	32.8385	33.1006	33.1783	32.966	33.1783
CARD16	Caspase recruitment domain-containing protein 16	Q5EG05-2;Q5EG05;E9PQW1	24.9254	24.8248	24.8471	24.7696	24.5328		-0.100639	0.943594		-0.0783024	0.972133		-0.155824	0.916272		-0.392614	0.731703		0.0223363	0.965024		-0.0551853	0.93376		-0.291976	0.462167		0.878548		24.6486	24.3307	25.797	24.6431	24.9043	24.9271	24.7234	25.0894	24.7286	24.9406	24.9225	24.4457	24.417	24.7645	24.417
CARD6	Caspase recruitment domain-containing protein 6	Q9BX69	26.5751	23.4153	26.3245	22.6532	25.892		-3.15972	0.547771		-0.250551	0.984592		-3.92181	0.612471		-0.68306	0.903485		2.90917	0.495519		0	0		2.47666	0.537102		0.474885		27.8858	23.4484	28.391	24.1206	23.3888	22.7367	28.2979	22.9239	27.7518	21.9815	22.5715	23.4067	27.4862	27.3662	22.8236
CARD8	Caspase recruitment domain-containing protein 8	Q9Y2G2;G3XAM9;E9PEM7	24.3121	23.7596	24.2535	24.3626	24.3017		-0.552473	0.622381		-0.0585887	0.845095		0.0505091	0.943204		-0.0103792	0.96157		0.493884	0.575625		0.602982	0.67366		0.542094	0.566204		0.530074		24.3376	24.4041	24.1946	23.1363	23.6937	24.4488	24.2535	24.2463	24.2607	24.317	24.0526	24.7182	24.2891	24.3843	24.2317
CARHSP1	Calcium-regulated heat stable protein 1	Q9Y2V2	25.4696	23.4526	23.3318	23.4523	23.7602		-2.01694	0.556757		-2.13779	0.831678		-2.01726	0.6133		-1.70937	0.551603		-0.120848	0.966599		-0.000323613	1		0.307571	0.863086		0.453702		25.4266	23.9316	27.0505	24.1488	23.9173	22.2918	24.4234	22.1823	23.3896	23.7037	23.8888	22.7644	24.417	23.1322	23.7314
CARKD	ATP-dependent (S)-NAD(P)H-hydrate dehydratase	B4DKX7;Q8IW45;Q8IW45-2;Q8IW45-4;B4DQR1	24.8456	24.3704	24.7315	24.7656	24.6786		-0.475198	0.44305		-0.1141	0.825054		-0.0800495	0.897577		-0.167013	0.645672		0.361099	0.229156		0.395149	0.584434		0.308185	0.439854		0.4069		24.6918	24.9225	24.9225	24.4923	24.3511	24.2678	24.6918	24.8433	24.6595	24.4923	24.6595	25.1449	24.7645	24.4425	24.8288
CARM1	Histone-arginine methyltransferase CARM1	Q86X55-1;Q86X55;Q86X55-2	24.8891	23.6987	24.5379	24.4377	23.3741		-1.19042	0.556554		-0.351257	0.832833		-0.451394	0.617279		-1.515	0.447733		0.839167	0.563926		0.73903	0.730937		-0.32458	0.870444		0.361144		25.0275	25.0359	24.604	24.2961	24.3376	22.4624	24.4614	24.6971	24.4551	24.4362	24.7389	24.1381	24.2678	23.2922	22.5623
CARS	Cysteine--tRNA ligase, cytoplasmic	P49589;P49589-3;B4DKY1;P49589-2;A8MVQ3	27.011	27.2278	27.2257	27.315	27.1946		0.216844	0.617944		0.214667	0.799839		0.304038	0.660552		0.183608	0.594085		-0.00217692	0.993117		0.0871938	0.872549		-0.0332355	0.807677		0.585618		26.7645	27.2077	27.0608	27.2262	27.3066	27.1507	27.3578	27.2077	27.1115	27.1312	27.217	27.5969	27.2445	27.1984	27.141
CASP2	Caspase-2;Caspase-2 subunit p18;Caspase-2 subunit p13;Caspase-2 subunit p12	C9JRS0;P42575-2;P42575	23.445	23.5663	24.6644	23.9229	24.339		0.12129	0.949752		1.21934	0.815135		0.477811	0.789761		0.89393	0.52209		1.09805	0.377213		0.356522	0.872547		0.772641	0.478271		0.455435		22.5776	23.9094	23.8481	22.9602	24.3674	23.3714	24.3176	24.6865	24.989	23.1071	24.6595	24.002	24.1719	24.4738	24.3712
CASP3	Caspase-3;Caspase-3 subunit p17;Caspase-3 subunit p12	P42574;A8MVM1	29.1585	29.2747	29.4117	29.394	29.397		0.116187	0.674714		0.253169	0.761601		0.235448	0.621012		0.238474	0.597484		0.136981	0.595846		0.11926	0.814246		0.122286	0.786312		0.649132		29.2445	29.066	29.1652	29.3494	29.1065	29.3683	29.4053	29.2891	29.5407	29.21	29.3662	29.6058	29.6697	29.104	29.4174
CASP4	Caspase-4;Caspase-4 subunit 1;Caspase-4 subunit 2	P49662;F8W830;P49662-2	25.4604	24.5159	25.7027	25.4823	25.8105		-0.944498	0.621805		0.242219	0.871629		0.0218938	0.985717		0.350045	0.696551		1.18672	0.423574		0.966392	0.63741		1.29454	0.439596		0.390892		25.6125	24.7995	25.9694	23.4518	25.3778	24.7182	25.4645	25.902	25.7415	25.1095	25.6012	25.7364	25.7234	25.9847	25.7234
CASP6	Caspase-6;Caspase-6 subunit p18;Caspase-6 subunit p11	P55212;D6RHU3;P55212-2	28.0932	27.9555	28.1002	28.106	28.0534		-0.137713	0.729102		0.00699933	0.991521		0.012771	0.980793		-0.0398871	0.909112		0.144712	0.537647		0.150484	0.764007		0.097826	0.72376		0.848433		27.8504	28.2123	28.217	27.8564	28.1361	27.8741	28.1842	28.0505	28.066	28.003	27.9869	28.3282	28.1015	28.1214	27.9372
CASP7	Caspase-7;Caspase-7 subunit p20;Caspase-7 subunit p11	B4DUB5;P55210;P55210-3;Q5SVL1;A6NF73;Q5SVL2;P55210-2	23.8952	24.1239	22.8444	23.4485	23.3619		0.228697	0.827881		-1.05088	0.843929		-0.446772	0.750346		-0.533381	0.740869		-1.27958	0.212867		-0.675468	0.53716		-0.762078	0.570084		0.45801		24.6264	23.3101	23.7492	23.9495	24.1332	24.2891	23.1775	22.2977	23.0579	23.7796	23.5869	22.9789	22.333	24.1147	23.6378
CASP9	Caspase;Caspase-9;Caspase-9 subunit p35;Caspase-9 subunit p10	Q5JRU8;F8VVS7;P55211;H0Y3S8;Q5JRU2;P55211-3;P55211-2;B4E1A3	25.8368	23.7063	26.02	25.999	26.0338		-2.13046	0.543986		0.183212	0.850203		0.162225	0.72646		0.19697	0.644047		2.31367	0.375563		2.29268	0.552979		2.32743	0.430167		0.240743		26.0588	25.8647	25.5869	22.334	23.2535	25.5315	26.329	25.9998	25.7312	25.9225	26.0833	25.9912	26.019	25.8764	26.2058
CASS4	Cas scaffolding protein family member 4	Q9NQ75;Q9NQ75-2	30.7234	30.7774	30.6852	30.841	30.8279		0.0540085	0.891101		-0.0382144	0.948941		0.117606	0.796331		0.10449	0.765685		-0.0922228	0.513746		0.0635974	0.881072		0.0504818	0.822594		0.787176		30.5934	30.9746	30.6022	30.6629	30.8234	30.8459	30.6964	30.6544	30.7047	30.6714	30.8234	31.0283	30.7047	30.8459	30.933
CAST	Calpastatin	E7ESM9;G5E9D3;B7Z468;P20810-5;P20810-7;P20810-6;E7ES10;E9PCH5;E7EVY3;B7Z574;P20810-4;G5E946;P20810-2;P20810;P20810-3;E9PDE4;H0Y9H6;H0Y7F0;F8W7E0;E7EQ12	26.4792	26.6107	25.7734	26.0442	26.0011		0.13147	0.877751		-0.705812	0.686939		-0.435001	0.621363		-0.478119	0.456582		-0.837283	0.329959		-0.566471	0.59582		-0.609589	0.444128		0.293197		26.2188	26.7389	26.48	27.0711	26.6181	26.143	25.9606	25.5285	25.8312	25.8576	25.8973	26.3778	26.0935	25.8409	26.0691
CAT	Catalase	P04040	31.4575	31.9056	31.6991	31.857	31.8307		0.448139	0.55048		0.241672	0.831996		0.39951	0.592719		0.373202	0.462381		-0.206467	0.617942		-0.0486291	0.946837		-0.0749372	0.882399		0.421481		31.3303	31.5889	31.4532	31.901	32.196	31.6198	31.7731	31.7533	31.5709	31.8719	32.0705	31.6285	31.8937	31.9916	31.6066
CBL	E3 ubiquitin-protein ligase CBL	P22681	27.006	26.9079	27.0215	26.9509	26.8199		-0.0980689	0.622276		0.0154845	0.967019		-0.0551332	0.89167		-0.186118	0.506383		0.113553	0.416678		0.0429357	0.923004		-0.0880489	0.617832		0.601532		26.9316	27.1214	26.965	26.8504	26.976	26.8973	26.9539	27.019	27.0914	26.7129	27.0084	27.1312	26.6998	26.8858	26.8741
CBR1	Carbonyl reductase [NADPH] 1	P16152;E9PQ63;A8MTM1;B4DFK7	29.5653	29.8	29.6861	29.9637	29.8862		0.234708	0.483359		0.120844	0.809956		0.398462	0.543186		0.320945	0.382921		-0.113864	0.665127		0.163754	0.592326		0.0862376	0.706478		0.210297		29.5969	29.588	29.5109	29.8459	29.8945	29.6595	29.8564	29.5682	29.6337	29.8916	30.0737	29.9259	29.94	29.7786	29.94
CC2D1B	Coiled-coil and C2 domain-containing protein 1B	H7C1U3;Q5T0F9-2;Q5T0F9;H0Y517;G8JLF2;Q5T0F9-3	24.9878	23.7578	24.2941	24.8648	24.9565		-1.23001	0.553651		-0.693722	0.845706		-0.123013	0.854638		-0.031381	0.964031		0.536286	0.820728		1.107	0.588795		1.19863	0.460934		0.530215		25.228	25.2058	24.5297	22.9719	24.945	23.3566	22.9548	25.0233	24.9043	24.8997	24.8904	24.8044	24.8288	25.2021	24.8385
CCBL2	Kynurenine--oxoglutarate transaminase 3	Q6YP21-3;Q6YP21;Q6YP21-2	24.3953	23.9204	24.8708	24.8857	24.9192		-0.47488	0.804352		0.475459	0.865694		0.490391	0.783604		0.523902	0.735969		0.950339	0.375982		0.965271	0.541632		0.998781	0.411167		0.523242		24.2317	25.5463	23.4079	23.2419	23.9672	24.5522	24.7492	24.7182	25.1449	24.8904	24.7995	24.9672	24.7895	24.9406	25.0275
CCDC22	Coiled-coil domain-containing protein 22	O60826;F5GXW9	24.2116	23.8265	24.201	24.6394	24.7369		-0.385075	0.84849		-0.0106125	0.997612		0.42786	0.780441		0.52535	0.69465		0.374463	0.861708		0.812935	0.653747		0.910425	0.497246		0.734163		24.8528	23.1499	24.632	23.08	23.5515	24.8481	23.114	24.6649	24.824	24.6376	24.5522	24.7286	24.604	24.7492	24.8576
CCDC53	WASH complex subunit CCDC53	F5GWI9;F5GXZ7;F5GZ97;Q9Y3C0	22.5893	23.2156	24.0855	22.8888	23.525		0.626306	0.796767		1.49614	0.796638		0.299427	0.94287		0.935686	0.674884		0.869839	0.301546		-0.326879	0.910331		0.30938	0.658484		0.636845		23.505	20.8204	23.4425	23.6409	23.2345	22.7715	23.867	24.2406	24.1488	23.4225	23.8858	21.358	23.6971	23.3376	23.5404
CCDC58	Coiled-coil domain-containing protein 58	C9JQ41;H7C525;Q4VC31	24.4555	25.4735	24.3859	24.8149	25.4352		1.01792	0.614199		-0.0696507	0.987585		0.359396	0.886032		0.979659	0.597109		-1.08757	0.50626		-0.658524	0.687608		-0.0382608	0.945929		0.639675		25.0105	25.2463	23.1099	25.5898	25.4298	25.4008	25.3135	24.7746	23.0696	23.8146	25.4394	25.1908	25.7821	25.3943	25.1293
CCDC6	Coiled-coil domain-containing protein 6	Q16204	27.0727	26.9074	26.878	27.0598	27.1493		-0.165384	0.640662		-0.194771	0.800159		-0.0129814	0.981749		0.0765572	0.803881		-0.0293872	0.910182		0.152403	0.687419		0.241941	0.339074		0.4774		27.2445	26.8623	27.1115	26.8142	26.9539	26.9539	26.8504	26.7645	27.019	26.9539	27.2714	26.9539	27.1312	27.2354	27.0813
CCDC88A	Girdin	Q3V6T2-2;Q3V6T2;B7ZM78;Q3V6T2-4;Q3V6T2-3	24.8125	24.4317	24.209	23.6441	24.5911		-0.380714	0.699633		-0.60343	0.788176		-1.16839	0.656346		-0.221312	0.803143		-0.222715	0.677568		-0.787677	0.721946		0.159403	0.489061		0.530271		24.1253	25.1174	25.1946	24.3844	24.5869	24.3239	23.8764	24.141	24.6096	24.6971	23.8093	22.4258	24.6811	24.5285	24.5638
CCDC91	Coiled-coil domain-containing protein 91	Q7Z6B0-3;Q7Z6B0-2;Q7Z6B0;F5H1Z3;F5H7G3	24.0417	24.743	24.7995	24.8916	24.9817		0.701302	0.610843		0.757788	0.790758		0.849876	0.632469		0.939978	0.555242		0.0564868	0.939489		0.148574	0.799793		0.238677	0.784759		0.523214		24.2463	24.6918	23.1871	24.6757	24.7441	24.8093	25.0359	24.3101	25.0526	25.2096	24.7895	24.6757	24.9361	24.391	25.6181
CCDC93	Coiled-coil domain-containing protein 93	F8W9X7;Q567U6	25.0089	24.8133	25.2182	24.8023	24.8421		-0.195599	0.878219		0.209327	0.82567		-0.206605	0.886386		-0.166773	0.852286		0.404926	0.721972		-0.011006	0.999448		0.0288264	0.98799		0.936373		25.0443	24.8336	25.1488	25.4738	23.9556	25.0105	25.5195	24.9406	25.1946	23.8504	25.3066	25.2499	25.1871	24.1372	25.2021
CCL5	C-C motif chemokine 5;RANTES(3-68);RANTES(4-68)	P13501	29.5215	30.1197	29.4608	29.1058	28.9347		0.598181	0.675011		-0.0606518	0.940528		-0.415693	0.614933		-0.586761	0.43301		-0.658833	0.565057		-1.01387	0.584963		-1.18494	0.427367		0.320727		29.5573	29.2239	29.7833	29.8489	31.0608	29.4492	29.5844	29.509	29.2891	29.3971	28.9146	29.0057	29.0864	28.8234	28.8945
CCND3	G1/S-specific cyclin-D3	P30281;E9PAS4;Q5T8J1;P30281-2	23.7716	23.0488	23.2664	23.7097	23.2841		-0.722699	0.744271		-0.505159	0.814111		-0.0618795	0.926794		-0.487448	0.713656		0.21754	0.934516		0.66082	0.828058		0.235251	0.924501		0.854626		24.1332	23.7389	23.4425	23.5522	24.1719	21.4225	23.2861	23.6209	22.8922	23.7796	23.6209	23.7286	22.3062	23.8385	23.7077
CCNY	Cyclin-Y	B7Z8E4;Q8ND76-3;Q8ND76-2;Q8ND76	23.9642	24.0969	24.0901	23.4879	23.8429		0.132654	0.909356		0.125907	0.906657		-0.476315	0.744433		-0.12136	0.930144		-0.00674693	0.995791		-0.608969	0.725539		-0.254014	0.863495		0.820898		23.5091	24.1015	24.2821	24.3239	24.48	23.4868	23.9584	24.3101	24.002	24.317	23.0115	23.1352	24.1488	24.4862	22.8937
CCS	Copper chaperone for superoxide dismutase;Superoxide dismutase [Cu-Zn]	O14618;E9PP76	28.2812	28.8929	28.9672	28.9299	28.8585		0.611697	0.611146		0.68593	0.80318		0.648671	0.651898		0.577305	0.585854		0.0742327	0.886513		0.036974	0.861754		-0.0343914	0.76137		0.470759		28.4473	28.8799	27.5165	28.906	28.9344	28.8385	28.965	28.6629	29.2736	28.9259	29.0164	28.8474	28.7927	28.906	28.877
CCT2	T-complex protein 1 subunit beta	P78371;P78371-2;F5GWF6;F8VQ14	31.143	31.25	31.3027	31.313	31.4406		0.106989	0.661228		0.159682	0.737637		0.169987	0.612659		0.297529	0.379125		0.052693	0.787164		0.0629978	0.861639		0.19054	0.439147		0.29182		31.1361	31.0737	31.2193	31.3828	31.225	31.1422	31.2422	31.3357	31.3303	31.2814	31.2193	31.4384	31.5203	31.3982	31.4032
CCT3	T-complex protein 1 subunit gamma	P49368;B4DUR8;P49368-2	31.1334	31.0468	31.2058	31.1916	31.21		-0.0865707	0.72751		0.0724125	0.848372		0.0582314	0.841743		0.0766271	0.696421		0.158983	0.457943		0.144802	0.67979		0.163198	0.459857		0.623425		31.1544	31.015	31.2308	31.1544	31.0673	30.9188	31.2814	31.2308	31.1053	31.1422	31.0864	31.3463	31.3033	31.1724	31.1544
CCT4	T-complex protein 1 subunit delta	P50991;B7Z9L0;F5H5W3;B7Z2F4	31.2075	30.9826	31.2261	31.2939	31.316		-0.224931	0.585571		0.0186024	0.972369		0.0864379	0.7963		0.108512	0.733872		0.243533	0.306613		0.311369	0.541248		0.333443	0.388668		0.322034		31.0864	31.1177	31.4184	31.08	30.8459	31.0217	31.2365	31.2814	31.1604	31.3303	31.1842	31.3672	31.4483	31.2019	31.2979
CCT5	T-complex protein 1 subunit epsilon	P48643;E7EWW2;E7ENZ3;B7ZAR1;E9PCA1;B4DYD8	31.0171	31.0603	31.1529	31.0635	31.1299		0.0431938	0.922955		0.135813	0.828115		0.0463727	0.940104		0.112785	0.696717		0.0926189	0.676249		0.00317891	0.999384		0.0695909	0.743318		0.890938		31.0608	30.8004	31.1901	31.0217	31.2193	30.94	31.1544	31.2308	31.0737	31.1177	30.8081	31.2647	31.1544	31.1177	31.1177
CCT6A	T-complex protein 1 subunit zeta	P40227;B4DPJ8;A6NCD2	31.3415	31.2099	31.43	31.5185	31.4563		-0.131631	0.643553		0.0884609	0.833995		0.177024	0.627151		0.114771	0.645117		0.220092	0.219539		0.308654	0.476894		0.246401	0.375346		0.268804		31.393	31.1783	31.4532	31.2478	31.2703	31.1115	31.4083	31.4532	31.4284	31.4919	31.4483	31.6154	31.5573	31.4032	31.4083
CCT7	T-complex protein 1 subunit eta	Q99832;B8ZZC9;F5GZK5;Q99832-4;B7Z1C9;Q99832-2	30.6973	30.6763	30.7234	30.7329	30.7493		-0.0209846	0.952883		0.0261046	0.946959		0.0355466	0.942766		0.0519524	0.827136		0.0470893	0.806334		0.0565313	0.911321		0.072937	0.731027		0.976092		30.7129	30.5481	30.8309	30.8004	30.5573	30.6714	30.7292	30.6798	30.7613	30.5203	30.7453	30.933	30.7129	30.8385	30.6964
CCT8	T-complex protein 1 subunit theta	B4DEM7;P50990;G5E9B2;B4DQH4	31.4326	31.5839	31.5684	31.5584	31.5873		0.151302	0.545236		0.135761	0.812338		0.125756	0.616767		0.15462	0.513331		-0.0155411	0.951097		-0.0255464	0.935514		0.00331815	0.991226		0.579577		31.3724	31.4871	31.4384	31.6964	31.4532	31.6022	31.5709	31.6329	31.5014	31.5573	31.4678	31.6501	31.5844	31.4727	31.7047
CD109	CD109 antigen	Q6YHK3;Q6YHK3-4;Q6YHK3-2;Q6YHK3-3	28.3725	28.5148	28.4565	28.591	28.6663		0.142312	0.882264		0.0840855	0.968332		0.218491	0.852607		0.293804	0.738342		-0.0582263	0.967407		0.0761795	0.96378		0.151492	0.88119		0.976484		27.9595	28.5934	28.5646	28.0084	28.5682	28.9677	27.965	28.2759	29.1288	28.0914	28.4234	29.258	28.1459	28.6998	29.1532
CD151	Tetraspanin;CD151 antigen	E9PL82;E9PRJ3;E9PMR4;P48509	27.1827	27.1429	22.1829	25.4127	23.9845		-0.0398515	0.995126		-4.99981	0.604393		-1.77006	0.77733		-3.19821	0.514984		-4.95996	0.114711		-1.73021	0.803135		-3.15836	0.423165		0.319674		29.1115	25.6348	26.8019	27.7895	26.0422	27.5969	21.8288	22.0345	22.6854	27.611	26.976	21.651	26.228	22.7591	22.9665
CD226	CD226 antigen	Q15762	27.8962	28.129	27.895	27.9503	28.276		0.232777	0.794789		-0.00122579	0.998963		0.054086	0.968612		0.379733	0.677934		-0.234002	0.334611		-0.178691	0.677959		0.146957	0.701377		0.701833		27.3828	28.5352	27.7708	28.1604	28.1556	28.0711	27.7581	27.8973	28.0296	27.7195	27.976	28.1556	28.0243	28.2759	28.5278
CD2AP	CD2-associated protein	Q9Y5K6	28.3079	28.4184	28.5398	28.5225	28.6831		0.110446	0.749224		0.231881	0.815742		0.214565	0.614242		0.375187	0.422382		0.121436	0.690036		0.10412	0.801054		0.264741	0.421996		0.303193		28.2399	28.217	28.4668	28.4473	28.2216	28.5862	28.5682	28.3951	28.6561	28.4938	28.4591	28.6146	28.6931	28.6798	28.6764
CD36	Platelet glycoprotein 4	E7EU05;P16671;D9IX66;E9PLT1;D9IX68	31.0834	31.4303	31.416	31.6886	31.6849		0.346841	0.666261		0.332513	0.796474		0.605157	0.564922		0.601424	0.45735		-0.0143274	0.985853		0.258317	0.71629		0.254583	0.672576		0.37051		30.7292	31.4284	31.0927	31.1604	31.8271	31.3033	31.4032	31.5799	31.2647	31.781	31.5435	31.7413	31.7088	31.8829	31.4629
CD40LG	CD40 ligand;CD40 ligand, membrane form;CD40 ligand, soluble form	P29965;Q3L8U2	24.3879	22.6849	24.9612	25.0941	24.053		-1.70301	0.552744		0.573343	0.853025		0.706239	0.744342		-0.334865	0.913184		2.27635	0.207667		2.40925	0.585593		1.36814	0.618653		0.37944		23.0265	25.2891	24.8481	21.7085	23.1312	23.215	25.0894	24.7129	25.0813	25.019	25.3545	24.9089	22.104	25.1833	24.8717
CD47	Leukocyte surface antigen CD47	Q08722-2;Q08722-3;Q08722-4;Q08722	26.8336	26.5883	26.7951	26.1133	24.8457		-0.245328	0.62042		-0.0385564	0.983635		-0.720366	0.778449		-1.98795	0.570998		0.206772	0.824321		-0.475037	0.880131		-1.74262	0.603976		0.607068		26.6865	26.976	26.8385	26.3049	26.8142	26.6458	26.4846	26.4692	27.4314	26.9202	27.0608	24.3587	22.8315	27.3578	24.3477
CD69	Early activation antigen CD69	Q07108;B4E009	25.0162	25.4905	24.3228	25.051	24.6625		0.474223	0.543191		-0.69348	0.832931		0.0347627	0.960119		-0.353792	0.564092		-1.1677	0.459992		-0.439461	0.542448		-0.828015	0.324828		0.470881		24.8288	25.3342	24.8858	25.2996	25.4073	25.7645	23.0814	25.0484	24.8385	24.8481	25.1293	25.1757	24.6209	24.9495	24.417
CD84	SLAM family member 5	Q9UIB8-3;Q9UIB8-2;Q9UIB8;Q9UIB8-6;Q9UIB8-5;Q9UIB8-4	28.0675	28.4235	28.4836	28.3831	28.5195		0.356064	0.569771		0.416114	0.806186		0.315648	0.683925		0.451987	0.575811		0.0600503	0.897622		-0.0404154	0.931286		0.0959231	0.876133		0.626245		27.6865	28.267	28.249	28.3662	28.3992	28.5052	28.1747	28.5862	28.6898	28.1604	28.5898	28.3992	28.0813	28.9089	28.5682
CD9	Tetraspanin;CD9 antigen	B4DPP0;A6NNI4;G8JLH6;P21926	30.9685	31.3898	31.2421	31.2002	31.4853		0.421213	0.714046		0.273541	0.846041		0.231636	0.776327		0.516771	0.471291		-0.147671	0.897129		-0.189576	0.89572		0.0955588	0.915017		0.734212		30.6458	31.341	30.9188	31.1783	32.0864	30.9046	31.1239	31.6415	30.9609	30.9882	31.0414	31.5709	31.5618	31.3879	31.5062
CD99	CD99 antigen	A6NIW1;P14209;A8MQT7;H7C2F2;P14209-2	25.5141	25.6199	25.9514	25.1654	24.8428		0.105796	0.930024		0.437321	0.81552		-0.348747	0.822497		-0.671354	0.50483		0.331525	0.720794		-0.454543	0.82856		-0.77715	0.451735		0.493648		25.9361	25.1449	25.4614	25.5105	26.1927	25.1565	25.4614	26.2002	26.1927	25.4551	25.8166	24.2244	25.239	24.5869	24.7024
CDC37	Hsp90 co-chaperone Cdc37;Hsp90 co-chaperone Cdc37, N-terminally processed	Q16543	29.9851	29.9345	29.7162	29.8099	29.7812		-0.050553	0.8661		-0.26884	0.818748		-0.175131	0.573766		-0.203878	0.549943		-0.218287	0.543312		-0.124578	0.688651		-0.153325	0.670365		0.528122		30.0608	30.0217	29.8726	30.0217	29.7469	30.0349	29.8858	29.7786	29.4842	29.837	29.7771	29.8157	29.8564	29.5754	29.9117
CDC42	Cell division control protein 42 homolog	P60953;E7ETU3;P60953-1;Q5JYX0	29.4241	29.6181	29.552	29.45	29.7309		0.193986	0.695873		0.127904	0.864641		0.0259285	0.959944		0.306846	0.522866		-0.0660826	0.88055		-0.168058	0.642532		0.11286	0.723096		0.533172		29.1532	29.6407	29.4785	29.4492	29.8081	29.5969	29.3325	29.6337	29.6898	29.4234	29.5052	29.4214	29.6424	29.8623	29.6881
CDC42BPB	Serine/threonine-protein kinase MRCK beta	Q9Y5S2	29.286	29.4984	29.4804	29.5093	29.6213		0.212456	0.553414		0.194409	0.82475		0.223334	0.617303		0.335356	0.448867		-0.0180467	0.943535		0.0108782	0.979046		0.1229	0.54452		0.321556		29.217	29.4473	29.1937	29.4012	29.6389	29.4551	29.4413	29.5664	29.4334	29.4214	29.4453	29.6612	29.5536	29.668	29.6424
CDK16	Cyclin-dependent kinase 16	F5H203;B7Z8T0;Q00536;E5RGN0	23.467	24.6953	23.6672	23.6873	22.7863		1.2283	0.549653		0	0		0.22028	0.943549		-0.680699	0.638564		-1.02811	0.38384		-1.00802	0.764503		-1.909	0.38108		0.50258		23.4224	24.062	22.9166	24.6896	23.9698	25.4266	23.8973	23.7111	23.3931	25.3811	23.1259	22.5548	21.8673	23.3645	23.1271
CDK17	Cyclin-dependent kinase 17	F5H6Z0;Q00537-2;Q00537	24.6133	23.9993	24.7501	24.0666	24.2354		-0.613998	0.621014		0.136794	0.896321		-0.546631	0.612248		-0.377894	0.675577		0.750793	0.415298		0.0673669	0.96137		0.236104	0.829778		0.460089		24.9271	24.1332	24.7796	24.558	23.3626	24.0772	24.6209	24.8904	24.7389	23.9672	24.1565	24.0762	23.7286	24.3511	24.6264
CDK2	Cyclin-dependent kinase 2	G3V5T9;P24941;E7ESI2;P24941-2	25.6308	25.0695	25.5183	25.6114	25.6699		-0.561288	0.614868		-0.112548	0.935638		-0.0193984	0.98111		0.0391032	0.945785		0.44874	0.596106		0.541889	0.6289		0.600391	0.465607		0.565017		25.3612	26.0359	25.4953	25.0062	24.5983	25.604	25.8433	25.0935	25.6181	25.4394	25.5045	25.8904	25.4583	25.7895	25.7619
CDK5	Cyclin-dependent-like kinase 5	Q00535;Q00535-2	27.3756	26.6979	27.3379	26.9717	26.995		-0.677739	0.497878		-0.0376898	0.971149		-0.403943	0.607952		-0.380635	0.523222		0.640049	0.308977		0.273795	0.683005		0.297104	0.564221		0.297921		27.632	27.3153	27.1795	26.8973	26.3943	26.8019	27.1312	27.2714	27.611	26.9428	26.7645	27.2077	26.7645	27.2445	26.976
CDK5RAP3	CDK5 regulatory subunit-associated protein 3	Q96JB5;F5H3I5;Q96JB5-2;Q96JB5-3	26.5164	26.6972	26.414	26.5564	26.4852		0.180808	0.713765		-0.102432	0.885968		0.0400391	0.95179		-0.0311737	0.942092		-0.283241	0.255739		-0.140769	0.687635		-0.211982	0.410794		0.614798		26.3595	26.3393	26.8504	26.7645	26.5754	26.7518	26.4692	26.4488	26.3239	26.6595	26.3778	26.632	26.4202	26.4457	26.5898
CDKN2D	Cyclin-dependent kinase 4 inhibitor D	P55273	29.3346	28.8643	29.2623	28.8122	28.6231		-0.470393	0.58923		-0.0723845	0.959517		-0.522493	0.645565		-0.711496	0.522149		0.398009	0.127843		-0.0520999	0.922146		-0.241102	0.708079		0.358629		29.8653	28.9977	29.141	28.877	28.9231	28.7927	29.2847	29.3131	29.189	28.5389	28.8445	29.0531	28.3367	29.1214	28.4113
CDV3	Protein CDV3 homolog	Q9UKY7;Q9UKY7-2	28.7465	28.9228	28.8969	29.0091	29.0873		0.176268	0.589898		0.150402	0.829248		0.262623	0.615277		0.340717	0.447791		-0.0258662	0.934734		0.0863546	0.693765		0.164449	0.464679		0.348369		28.6865	28.9316	28.6216	28.8385	28.9567	28.9732	29.0839	28.805	28.8019	28.906	29.0427	29.0788	29.203	28.9622	29.0965
CELF2	CUGBP Elav-like family member 2	Q5VZZ6;E9PC62;O95319-5;O95319-2;O95319;O95319-4;O95319-3	26.1176	26.4073	26.3499	26.5086	26.6654		0.289718	0.615578		0.232354	0.837158		0.39098	0.641221		0.547777	0.452644		-0.0573635	0.873488		0.101262	0.829938		0.258059	0.414632		0.36966		25.8336	26.4769	26.0422	26.4984	26.3894	26.3342	26.5463	26.1507	26.3528	26.3135	26.4862	26.726	26.604	26.8385	26.5536
CEP131	Centrosomal protein of 131 kDa	Q9UPN4-2;Q9UPN4;I3L2J8;Q9UPN4-3;I3L2X7	25.6127	25.2674	24.3112	24.7397	25.3689		-0.345292	0.618843		-1.30148	0.812091		-0.873024	0.757479		-0.243793	0.668087		-0.956188	0.678116		-0.527732	0.873024		0.101498	0.849718		0.740302		25.2571	25.8191	25.7619	25.5667	25.0484	25.1871	25.1095	25.452	22.3722	25.5195	25.7441	22.9554	25.4298	25.5754	25.1015
CEP170	Centrosomal protein of 170 kDa	Q5SW79;Q5SW79-3;Q5SW79-2;H0Y2V6	25.6987	26.0074	25.6276	25.8065	25.5291		0.308706	0.590112		-0.0710971	0.943767		0.107723	0.777542		-0.169606	0.618557		-0.379803	0.510623		-0.200982	0.689359		-0.478312	0.382677		0.467231		25.9202	25.6209	25.5551	26.1015	25.7338	26.1871	26.0127	25.5225	25.3477	25.9248	25.705	25.7895	25.4008	25.6403	25.5463
CFB	Complement factor B;Complement factor B Ba fragment;Complement factor B Bb fragment	B4E1Z4;E7EVA3;P00751;E7ETN3;B0UXW4;H7C5H1;P00751-2	27.3863	27.7346	27.6648	27.6506	27.5996		0.348297	0.719366		0.278553	0.846267		0.264354	0.777751		0.213306	0.809824		-0.0697441	0.917917		-0.083943	0.920451		-0.134991	0.847466		0.855172		26.8623	27.8973	27.3992	27.3494	28.0401	27.8142	27.632	27.524	27.8385	27.4234	27.7895	27.7389	27.2535	27.8858	27.6595
CFH	Complement factor H	P08603;P08603-2	27.9391	28.199	28.2115	28.0541	28.12		0.259942	0.569542		0.272434	0.810379		0.115019	0.783485		0.180969	0.715161		0.0124919	0.98468		-0.144923	0.814812		-0.0789731	0.888112		0.758894		28.0762	27.9146	27.8264	27.9814	28.4032	28.2123	27.9977	28.17	28.4668	27.8081	28.189	28.1652	27.7645	28.3787	28.217
CFHR1	Complement factor H-related protein 1	B1AKG0;Q03591	22.962	24.1193	23.5839	23.9304	22.8972		1.15729	0.493286		0.621916	0.811131		0.968339	0.595884		0	0		-0.535374	0.376161		-0.18895	0.861565		-1.22215	0.466083		0.355099		23.4172	22.3917	23.0772	23.9134	23.9584	24.4862	23.7895	23.6273	23.3349	24.2779	23.5285	23.9847	21.7465	23.4744	23.4706
CFHR2	Complement factor H-related protein 2	P36980-2;P36980	23.1468	23.9812	23.1285	23.2148	23.1005		0.834454	0.528319		-0.0182667	0.992191		0.0680046	0.931469		-0.0463257	0.931312		-0.852721	0.455498		-0.76645	0.544963		-0.88078	0.380507		0.406474		22.9542	23.4846	23.0015	24.163	24.3131	23.4676	22.5935	22.944	23.8481	23.3345	23.4298	22.8801	22.8624	23.1855	23.2535
CFL1	Cofilin-1	P23528;E9PP50;G3V1A4;E9PK25;E9PQB7;E9PS23;E9PLJ3	34.3309	34.3101	34.4309	34.5166	34.417		-0.0207914	0.96307		0.0999908	0.846193		0.185698	0.661384		0.0861295	0.705056		0.120782	0.740961		0.20649	0.688655		0.106921	0.762693		0.701928		34.1901	34.3568	34.4458	34.0592	34.4883	34.3828	34.4458	34.2828	34.5641	34.3828	34.4883	34.6787	34.4146	34.3303	34.5062
CFL2	Cofilin-2	Q9Y281;G3V5P4	23.4525	22.8353	23.5896	23.9311	24.28		-0.617172	0.758069		0.137107	0.971011		0.478596	0.79363		0.827468	0.595614		0.754279	0.598294		1.09577	0.587268		1.44464	0.386935		0.508606		22.2586	23.9043	24.1946	23.5166	21.8832	23.1062	24.1095	23.8288	22.8305	23.5674	24.3778	23.8481	24.1565	24.2096	24.4738
CHCHD3	MICOS complex subunit MIC19	C9JRZ6;Q9NX63;F8WAR4;G3V1K1	25.605	26.2943	25.4895	26.0053	26.0462		0.689337	0.533447		-0.115413	0.889241		0.400293	0.617363		0.44128	0.521295		-0.80475	0.320877		-0.289044	0.763218		-0.248057	0.740018		0.312744		25.417	25.8694	25.5285	26.5754	26.4738	25.8336	25.7746	25.4298	25.2643	26.2535	25.7518	26.0105	25.8858	25.8457	26.4073
CHID1	Chitinase domain-containing protein 1	Q9BWS9-3;Q9BWS9;Q9BWS9-2;E9PI70;E9PIP0;E9PRL3;E9PPH0;E9PPA0	26.8547	26.5542	26.8113	26.5796	26.4489		-0.300459	0.616983		-0.0434246	0.972293		-0.275076	0.656185		-0.405773	0.514042		0.257034	0.573556		0.025383	0.908438		-0.105314	0.671685		0.480559		27.0711	26.4953	26.9977	26.632	26.441	26.5898	26.4583	27.1015	26.8741	26.5754	26.5595	26.604	26.3256	26.5898	26.4314
CHKB	Choline/ethanolamine kinase	Q9Y259	27.223	26.8742	27.0423	27.0365	27.1981		-0.348855	0.613021		-0.18071	0.851176		-0.186543	0.777245		-0.0249138	0.969397		0.168145	0.442383		0.162313	0.571724		0.323942	0.410406		0.54972		27.17	26.8741	27.6251	26.965	26.726	26.9316	27.0505	26.965	27.1115	27.0608	27.0296	27.019	27.0608	27.3828	27.1507
CHMP1A	Charged multivesicular body protein 1a	Q9HD42;F8VUA2;F8VVT7;F5H875	26.8721	27.0081	25.8673	26.3865	26.6691		0.135962	0.90718		-1.0048	0.815223		-0.485579	0.704121		-0.203008	0.798766		-1.14076	0.423485		-0.62154	0.618361		-0.33897	0.65463		0.453086		27.391	26.4234	26.8019	27.4394	27.0608	26.524	24.9628	25.9933	26.6458	26.4831	26.7518	25.9248	26.9202	26.604	26.4831
CHMP1B	Charged multivesicular body protein 1b	Q7LBR1	26.7856	26.6219	26.7721	25.9068	26.2356		-0.163632	0.814986		-0.0134474	0.992282		-0.878798	0.772549		-0.550004	0.431755		0.150185	0.882336		-0.715166	0.555417		-0.386372	0.569419		0.303362		26.965	26.8019	26.5898	27.0711	26.5448	26.2499	26.518	26.518	27.2803	26.1719	25.9933	25.5551	25.9869	26.4378	26.2821
CHMP2A	Charged multivesicular body protein 2a	O43633	25.7457	23.9301	25.7736	25.7253	25.574		-1.81559	0.552657		0.0278645	0.985528		-0.0204239	0.98459		-0.171665	0.861532		1.84346	0.396477		1.79517	0.575477		1.64393	0.470329		0.322791		26.1391	25.0854	26.0127	23.0503	23.1332	25.6068	25.673	25.8044	25.8433	25.6153	25.9202	25.6403	25.1253	25.6971	25.8997
CHMP2B	Charged multivesicular body protein 2b	C9J0A7;Q9UQN3;B4DJG8	23.989	24.5411	22.5692	23.6839	23.0422		0.552094	0.787803		-1.41986	0.787378		-0.305083	0.890611		-0.946857	0.676388		-1.97195	0.238405		-0.857176	0.504786		-1.49895	0.402913		0.369697		24.6918	24.7594	22.5159	24.2317	24.8336	24.558	21.6788	22.7927	23.236	23.8576	23.4569	23.7373	23.4067	22.0016	23.7182
CHMP3	Charged multivesicular body protein 3	Q9Y3E7-2;Q9Y3E7;Q9Y3E7-3;Q9Y3E7-4	24.91	23.804	25.1596	24.7332	24.3772		-1.10598	0.613066		0.249551	0.88927		-0.176828	0.882347		-0.53285	0.746063		1.35554	0.467843		0.929156	0.697765		0.573135	0.803337		0.620592		24.5983	24.8044	25.3273	23.6258	22.7672	25.019	24.4551	25.2821	25.7415	25.2058	24.0667	24.9271	23.0949	25.065	24.9716
CHMP4A	Charged multivesicular body protein 4a	H0YI46;Q9BY43;Q14D22;E9PQI5;E9PQ80;E9PSI1	26.6747	26.4555	26.537	26.5472	26.4775		-0.219228	0.615428		-0.137726	0.842975		-0.127461	0.780611		-0.19714	0.601574		0.0815016	0.436188		0.091767	0.725021		0.0220884	0.85863		0.609512		26.9316	26.433	26.6595	26.4362	26.4122	26.518	26.5551	26.5696	26.4862	26.604	26.4057	26.632	26.533	26.4089	26.4908
CHMP4B	Charged multivesicular body protein 4b	Q9H444	26.4909	26.9911	26.4958	26.693	26.6063		0.500172	0.496419		0.00489426	0.991901		0.202082	0.612019		0.115314	0.73188		-0.495278	0.308947		-0.29809	0.587741		-0.384858	0.464528		0.286458		26.5898	26.4953	26.3877	26.7771	27.2535	26.9428	26.5653	26.3325	26.5898	26.5898	26.6998	26.7895	26.7645	26.3679	26.6865
CHMP5	Charged multivesicular body protein 5	Q9NZZ3;Q9NZZ3-2	25.1612	24.2174	25.0345	23.8804	24.3067		-0.943717	0.715501		-0.126697	0.940414		-1.28076	0.661311		-0.854475	0.725744		0.81702	0.716574		-0.337041	0.937938		0.0892423	0.983341		0.799068		24.6376	25.5638	25.2821	22.4176	25.1946	25.0401	25.5898	24.7695	24.7441	22.4016	25.2058	24.0337	22.4386	25.3443	25.1371
CHMP6	Charged multivesicular body protein 6	Q96FZ7;I3L4A1;I3L3E4;I3L4G8	23.3702	24.8778	24.9861	24.9295	24.8762		1.5076	0.623329		1.61597	0.796169		1.55937	0.662886		1.50604	0.586271		0.108372	0.897214		0.0517705	0.908749		-0.0015653	0.997284		0.477776		24.256	24.5638	21.2906	24.7234	24.7846	25.1253	24.867	24.5869	25.5045	24.8997	24.9847	24.9043	25.0105	25.0484	24.5696
CHORDC1	Cysteine and histidine-rich domain-containing protein 1	Q9UHD1;Q9UHD1-2;E9PPQ5	27.2924	27.0797	27.314	27.0543	27.1968		-0.212667	0.627027		0.0216586	0.976678		-0.238017	0.658472		-0.0955187	0.804164		0.234326	0.261249		-0.0253499	0.931498		0.117149	0.488081		0.448941		27.5463	27.0505	27.2803	26.9869	27.1015	27.1507	27.2445	27.3066	27.391	27.0296	26.9539	27.1795	27.141	27.1604	27.2891
CHP1	Calcineurin B homologous protein 1	Q99653;H0YKE7;F5GX29;H0YNG9;H0YLY7	26.1835	25.8943	26.0367	25.9661	26.4361		-0.289155	0.539253		-0.146832	0.853548		-0.217384	0.695409		0.25258	0.507346		0.142324	0.791143		0.071771	0.917659		0.541735	0.381069		0.371874		26.1965	26.2188	26.1352	25.9316	26.065	25.6865	26.1115	26.3014	25.6971	26.0526	26.189	25.6568	26.6181	26.4676	26.2225
CHUK	Inhibitor of nuclear factor kappa-B kinase subunit alpha	O15111	25.8098	25.9949	26.103	26.0988	26.0003		0.185138	0.773835		0.293197	0.85034		0.289079	0.725588		0.190554	0.771508		0.108059	0.882776		0.103941	0.836991		0.0054156	0.99186		0.850826		25.4831	26.2571	25.6891	25.9869	25.8647	26.1332	25.6784	26.515	26.1154	25.9202	26.0732	26.3031	26.1776	26.0691	25.7543
CIAPIN1	Anamorsin	Q6FI81-3;Q6FI81;H3BV90;H3BT65	25.891	26.3103	25.951	26.4413	26.1994		0.419309	0.485836		0.0599778	0.925825		0.550306	0.83994		0.308418	0.551901		-0.359331	0.345073		0.130997	0.726021		-0.110891	0.799627		0.26954		25.6784	26.0317	25.9628	26.1927	26.2535	26.4846	26.1449	25.8433	25.8647	26.3443	26.4041	26.5754	26.2426	25.9225	26.433
CIRBP	Cold-inducible RNA-binding protein	Q14011;B4E2X2	24.9678	24.8291	23.8298	25.5004	24.7005		-0.13869	0.954743		-1.13799	0.845607		0.532668	0.570752		-0.267295	0.833606		-0.999297	0.778614		0.671358	0.815216		-0.128605	0.963148		0.734373		25.1946	24.9043	24.8044	23.3498	25.1527	25.9847	24.8093	21.452	25.228	25.2678	25.7846	25.4488	25.1565	23.7131	25.2317
CKAP5	Cytoskeleton-associated protein 5	Q14008-2;Q14008;Q14008-3	30.9275	30.6914	30.9948	30.9255	30.9488		-0.23613	0.557057		0.0672925	0.86217		-0.00204595	0.993346		0.0213464	0.90911		0.303422	0.368098		0.234084	0.585383		0.257476	0.438596		0.358671		30.8608	30.8608	31.0608	30.8385	30.4823	30.7533	30.947	31.1115	30.9259	30.94	30.8081	31.0283	30.9746	30.8973	30.9746
CLASP1	CLIP-associating protein 1	E7EUA5;F8WA11;Q7Z460-2;B7ZLX3;F5GWS0;Q7Z460-3;Q7Z460;F5H2E2;F5GWM7	27.0918	26.7224	27.2487	26.9175	26.9286		-0.369339	0.55532		0.156867	0.849722		-0.174245	0.656136		-0.163166	0.59191		0.526206	0.3495		0.195094	0.673252		0.206173	0.553154		0.320742		27.2625	26.9316	27.0813	26.8504	26.4785	26.8385	26.9428	27.3325	27.4707	26.8741	27.0401	26.8385	26.9316	27.0401	26.8142
CLASP2	CLIP-associating protein 2	E7ERI8;E7EW49;F5H604;E3W994;O75122;E9PBA6;F5H3X0	25.4353	25.0227	25.4418	25.5594	24.2711		-0.412556	0.529136		0.00652377	0.987135		0.124194	0.657143		-1.16416	0.708516		0.419079	0.358503		0.53675	0.540949		-0.751605	0.812471		0.701538		25.4892	25.3273	25.4892	25.2317	24.7389	25.0975	25.3307	25.5841	25.4105	25.4831	25.6757	25.5195	25.5926	25.433	21.7876
CLEC11A	C-type lectin domain family 11 member A	Q9Y240;C9JXV2	25.1433	25.0821	25.1005	24.9598	24.6604		-0.0612303	0.961025		-0.042853	0.984033		-0.183551	0.890987		-0.482915	0.681588		0.0183773	0.969779		-0.122321	0.904194		-0.421684	0.587694		0.794838		25.2535	25.7466	24.4298	25.3031	25.1095	24.8336	25.2096	25.0813	25.0105	25.4008	24.9089	24.5696	24.7746	25.0813	24.1253
CLEC16A	Protein CLEC16A	F5H4D0;Q2KHT3-2;Q2KHT3	23.7838	23.5349	23.7639	23.7586	23.6448		-0.248924	0.787712		-0.0199121	0.991612		-0.0252107	0.983957		-0.138984	0.868353		0.229012	0.653268		0.223713	0.853721		0.10994	0.815035		0.95062		23.5755	24.4046	23.3713	23.7492	23.5453	23.3101	23.7182	23.48	24.0935	23.5404	23.391	24.3443	23.9134	23.5045	23.5165
CLEC1B	C-type lectin domain family 1 member B	Q9P126-2;Q9P126;H7BYT8	27.9325	27.6068	27.7726	27.8045	27.8938		-0.325668	0.537581		-0.159852	0.854036		-0.127972	0.817804		-0.03873	0.93891		0.165816	0.720258		0.197697	0.761742		0.286938	0.550547		0.734037		27.726	28.1065	27.965	27.6389	27.7581	27.4234	27.4551	28.0243	27.8385	27.6931	28.1164	27.604	27.6458	28.203	27.8324
CLIC1	Chloride intracellular channel protein 1	O00299	34.1839	34.3769	34.3551	34.4455	34.2586		0.193022	0.659569		0.171148	0.829541		0.261574	0.658463		0.0747083	0.847005		-0.0218747	0.916545		0.0685514	0.860687		-0.118314	0.569943		0.584725		34.1679	34.4334	33.9505	34.4334	34.2828	34.4146	34.4083	34.402	34.2549	34.2619	34.4823	34.5922	34.3033	34.1223	34.3502
CLIC4	Chloride intracellular channel protein 4	Q9Y696;F5H1F8	31.0314	31.2295	31.162	31.0983	31.2323		0.198075	0.480248		0.130571	0.819955		0.0668977	0.799883		0.200863	0.416359		-0.0675042	0.56063		-0.131177	0.673918		0.00278791	0.987682		0.33664		31.0864	31.0608	30.947	31.2193	31.3088	31.1604	31.1177	31.2019	31.1664	30.9677	31.0737	31.2535	31.2647	31.1842	31.2478
CLINT1	Clathrin interactor 1	Q14677-2;Q14677-3	29.1691	29.182	29.088	29.0106	29.1251		0.0129204	0.970526		-0.0810947	0.885421		-0.158541	0.699681		-0.0439828	0.901647		-0.0940151	0.596163		-0.171462	0.48446		-0.0569032	0.770637		0.689249		28.9787	29.3828	29.1459	29.1263	29.1913	29.2285	29.0965	29.2054	28.9622	28.965	29.0111	29.0557	29.2285	28.9841	29.1628
CLIP1	CAP-Gly domain-containing linker protein 1	P30622-2;P30622-1;P30622;F5H0P3;F5H0N7	28.8641	28.8686	28.8297	28.9253	28.8989		0.00446892	0.990542		-0.0343386	0.935293		0.0611731	0.815288		0.0348256	0.859408		-0.0388076	0.876432		0.0567042	0.859535		0.0303567	0.87303		0.88539		28.9787	28.8973	28.7162	28.7989	28.7958	29.0111	28.9089	28.7389	28.8415	28.906	28.8534	29.0164	28.8887	28.8653	28.9428
CLIP2	CAP-Gly domain-containing linker protein 2	F5GYW3;Q9UDT6-2;Q9UDT6	28.7941	28.7923	28.4006	28.4718	28.6691		-0.00186793	0.996183		-0.393515	0.823028		-0.32235	0.603412		-0.125065	0.773279		-0.391647	0.30828		-0.320482	0.571881		-0.123197	0.670869		0.325635		29.0634	28.6527	28.6663	28.7581	28.8385	28.7802	28.4938	28.5573	28.1507	28.4433	28.3787	28.5934	28.8741	28.6355	28.4976
CLSTN1	Calsyntenin-1;Soluble Alc-alpha;CTF1-alpha	B4E3Q1;O94985-2;O94985;Q5SR54	24.8675	23.0955	24.5195	24.8635	24.0638		-1.77197	0.52699		-0.348016	0.943531		-0.00396983	0.997817		-0.803738	0.770472		1.42396	0.527824		1.768	0.538835		0.968237	0.693911		0.648742		25.2891	25.6703	23.6431	23.3651	23.3526	22.5688	25.3511	25.5195	22.6878	23.691	25.8142	25.0854	24.6376	22.2646	25.2891
CLTA	Clathrin light chain A	P09496-2;P09496-4;P09496-3;P09496;F8WF69;F5H6N3	29.2951	29.601	29.1407	29.3843	29.3832		0.305845	0.493252		-0.15449	0.835657		0.0891336	0.773017		0.0880203	0.745758		-0.460335	0.211257		-0.216712	0.598026		-0.217825	0.51155		0.269874		29.2193	29.3683	29.2979	29.6093	29.7405	29.4532	29.217	29.1288	29.0762	29.5071	29.4334	29.2123	29.4492	29.5184	29.1819
CLTB	Clathrin light chain B	P09497-2;P09497	27.6559	27.6411	27.611	27.7749	27.7353		-0.0147915	0.977333		-0.0448748	0.951977		0.11901	0.852357		0.079373	0.841679		-0.0300833	0.923643		0.133801	0.847566		0.0941645	0.739518		0.890428		27.9595	27.5609	27.4473	27.7195	27.4394	27.7645	27.6181	27.5969	27.6181	28.0243	27.4862	27.8142	27.8203	27.6595	27.726
CLTC	Clathrin heavy chain 1	Q00610-2;Q00610	33.4935	33.5901	33.7417	33.8097	33.7971		0.0965881	0.688043		0.248183	0.759583		0.316218	0.568748		0.303661	0.452116		0.151595	0.217774		0.21963	0.493909		0.207073	0.219689		0.172365		33.3436	33.6307	33.5062	33.5754	33.6307	33.5641	33.7252	33.7849	33.715	33.7946	33.7553	33.8792	33.7353	33.8233	33.8328
CLU	Clusterin;Clusterin beta chain;Clusterin alpha chain;Clusterin	P10909-4;P10909;P10909-5;P10909-2;E7ETA7;H0YLK8;H0YC35;P10909-3;E7ERK6	31.4854	32.0101	31.7115	31.7556	31.698		0.524731	0.610546		0.226099	0.873889		0.270173	0.782436		0.212584	0.808216		-0.298632	0.506539		-0.254558	0.61837		-0.312147	0.469129		0.660013		31.1664	32.1115	31.1783	31.8459	32.0544	32.13	31.9848	31.4083	31.7413	31.8756	31.5156	31.8756	31.8271	31.4134	31.8534
CMIP	C-Maf-inducing protein	Q8IY22;Q8IY22-2;Q8IY22-3	30.5097	30.573	30.5592	30.4759	30.4941		0.0633214	0.842648		0.049455	0.853558		-0.0338332	0.885077		-0.0156587	0.94276		-0.0138664	0.969134		-0.0971546	0.8439		-0.0789801	0.821424		0.909959		30.5014	30.5844	30.4433	30.3515	30.7047	30.6629	30.5014	30.5389	30.6372	30.4134	30.4032	30.611	30.393	30.4433	30.6458
CMPK1	UMP-CMP kinase	P30085;Q5T0D2	30.1635	30.3457	30.1805	30.4134	30.3051		0.182219	0.578657		0.017067	0.974466		0.249966	0.646098		0.141691	0.706889		-0.165152	0.473645		0.0677465	0.88873		-0.040528	0.90921		0.609366		30.3303	30.0737	30.0864	30.3515	30.4433	30.2422	30.3196	30.0737	30.1483	30.2535	30.341	30.6458	30.5203	30.0864	30.3088
CNBP	Cellular nucleic acid-binding protein	P62633-2;P62633-5;P62633;P62633-4;E9PDR7;B4DP17;P62633-3	23.3723	23.5733	23.2785	23.6958	22.654		0.200975	0.852729		-0.0937792	0.940413		0.323492	0.658408		-0.718302	0.433965		-0.294755	0.810659		0.122517	0.936569		-0.919278	0.442832		0.36054		23.5522	23.2136	23.3511	23.6431	22.8672	24.2096	23.0602	23.8137	22.9617	23.3645	24.0011	23.7217	22.8573	22.6804	22.4242
CNDP2	Cytosolic non-specific dipeptidase	Q96KP4;Q96KP4-2	30.0608	30.0827	30.2129	30.2192	30.303		0.0218226	0.949769		0.152088	0.799539		0.15834	0.737143		0.242107	0.46673		0.130266	0.558225		0.136517	0.796587		0.220285	0.433757		0.562251		29.94	30.2077	30.0349	30.0864	29.9539	30.2077	30.3303	30.1361	30.1724	30.2193	29.995	30.4433	30.4134	30.2308	30.2647
CNN2	Calponin;Calponin-2	B4DDF4;B4DUT8;Q99439;E7ENR3;Q99439-2	32.7606	33.0822	32.8792	32.9668	32.9713		0.321602	0.608185		0.118554	0.895561		0.206228	0.744763		0.210706	0.711535		-0.203047	0.555468		-0.115374	0.793487		-0.110896	0.771385		0.698249		32.3854	32.9865	32.9099	32.9099	33.1975	33.1392	33.02	32.648	32.9695	32.829	32.9522	33.1192	33.1223	32.7211	33.0705
CNOT1	CCR4-NOT transcription complex subunit 1	A5YKK6;A5YKK6-2;F8WA87;A5YKK6-3;A5YKK6-4	27.9329	28.2144	28.2522	28.3532	28.3622		0.281493	0.669998		0.319304	0.814495		0.420309	0.658492		0.429312	0.569506		0.0378113	0.936035		0.138816	0.877556		0.147819	0.825178		0.660839		27.8142	27.6998	28.2847	28.5165	28.0813	28.0453	28.1652	28.2979	28.2935	27.9539	28.5052	28.6004	28.3869	28.7292	27.9705
CNOT10	CCR4-NOT transcription complex subunit 10	Q9H9A5-4;Q9H9A5-3;Q9H9A5-2;Q9H9A5;F8WAF2;H7C1X9	23.2001	22.9487	23.6259	23.0683	22.8704		-0.251413	0.754189		0.425776	0.807625		-0.131838	0.831189		-0.329681	0.704266		0.67719	0.466752		0.119575	0.90974		-0.0782681	0.946007		0.537479		23.1766	22.9193	23.5045	22.9266	22.5025	23.417	23.5475	23.2049	24.1253	22.8716	23.3101	23.0231	23.0729	22.2776	23.2607
CNP	2,3-cyclic-nucleotide 3-phosphodiesterase	P09543-2;P09543;F8W7I0	27.1853	27.2798	27.1739	27.4471	27.3319		0.0944818	0.815271		-0.0114352	0.986255		0.261773	0.584729		0.146574	0.839333		-0.105917	0.817453		0.167292	0.702959		0.0520922	0.955867		0.825665		27.0401	27.2714	27.2445	27.5014	27.0401	27.2979	27.3662	26.976	27.1795	27.4154	27.4629	27.4629	27.4862	26.7771	27.7325
CNPY2		F8W031;F8VXJ7;F8W1K5	26.5109	26.9957	26.6897	26.832	26.5864		0.484709	0.460309		0.178781	0.825106		0.321016	0.614716		0.0754935	0.916984		-0.305928	0.431142		-0.163692	0.797422		-0.409215	0.564247		0.558491		26.632	26.533	26.3679	26.8142	27.0914	27.0813	26.8623	26.4551	26.7518	27.0711	26.5507	26.8741	26.6865	26.0752	26.9977
CNPY3	Protein canopy homolog 3	Q9BT09	27.7114	27.6472	27.5094	27.8344	27.7618		-0.0641823	0.862719		-0.201982	0.833887		0.122959	0.808129		0.0504513	0.879789		-0.1378	0.690063		0.187141	0.659526		0.114634	0.413811		0.583665		27.6527	27.965	27.5165	27.5826	27.6527	27.7064	27.7895	27.3153	27.4234	27.6527	27.7895	28.0608	27.7453	27.8142	27.726
CNST	Consortin	Q6PJW8;Q6PJW8-2	28.6851	28.3757	28.8287	28.6434	28.9534		-0.309453	0.716572		0.14361	0.879628		-0.0417608	0.959399		0.268223	0.676816		0.453063	0.455278		0.267693	0.744826		0.577677	0.45048		0.509149		28.3494	29.0914	28.6146	27.9259	28.5315	28.6697	28.6629	28.9031	28.9202	28.5014	28.7389	28.6898	28.673	29.1288	29.0583
COASY	Bifunctional coenzyme A synthase;Phosphopantetheine adenylyltransferase;Dephospho-CoA kinase	Q13057;Q13057-2	27.2114	27.1597	27.446	27.2138	27.3195		-0.0516281	0.837208		0.234636	0.82966		0.0024821	0.992816		0.108149	0.719561		0.286264	0.513448		0.0541102	0.91227		0.159777	0.469559		0.678462		27.3828	27.0813	27.17	27.217	27.1115	27.1507	27.0813	27.604	27.6527	27.2262	26.976	27.4394	27.3066	27.189	27.4629
COG1	Conserved oligomeric Golgi complex subunit 1	Q8WTW3;E9PBL8	24.5792	24.6553	24.0387	24.0026	23.304		0.0761147	0.905314		-0.540543	0.844597		-0.576652	0.74065		-1.27519	0.470341		-0.616658	0.611798		-0.652767	0.722304		-1.3513	0.397938		0.511692		24.417	24.3712	24.9495	24.4425	24.7846	24.7389	25.0275	23.7979	23.2907	24.8433	22.9926	24.1719	24.1795	23.1887	22.5439
COG2	Conserved oligomeric Golgi complex subunit 2	B7Z2Y2;Q14746-2;Q14746;F5H1E5;B7Z7N2	24.6199	23.5318	24.6899	24.5845	24.5418		-1.08812	0.526851		0.0700652	0.920024		-0.0353788	0.953272		-0.0780786	0.837278		1.15819	0.310059		1.05275	0.546797		1.01005	0.40402		0.201989		24.3645	24.6376	24.8576	22.9214	23.4718	24.2021	24.6811	24.5696	24.8191	24.6209	24.7286	24.4041	24.4488	24.654	24.5225
COG3	Conserved oligomeric Golgi complex subunit 3	Q96JB2;Q96JB2-2	24.2058	23.8175	25.08	24.9128	25.1327		-0.388271	0.877313		0.874214	0.83374		0.706988	0.621199		0.926908	0.451378		1.26248	0.52611		1.09526	0.688356		1.31518	0.537915		0.470778		24.7796	24.239	23.5988	24.391	22.1712	24.8904	24.989	24.9584	25.2926	24.9089	24.9672	24.8623	25.2133	25.2354	24.9495
COG4	Conserved oligomeric Golgi complex subunit 4	Q9H9E3;Q9H9E3-3;Q9H9E3-2	24.1732	23.6573	23.3268	23.9316	24.4053		-0.515863	0.539961		-0.84633	0.82404		-0.241574	0.77378		0.232153	0.634694		-0.330467	0.871847		0.274289	0.817284		0.748016	0.397673		0.565277		24.3578	24.0443	24.1174	23.9672	23.7594	23.2454	23.895	24.1174	21.9681	24.239	24.1253	23.4305	24.7389	24.2021	24.275
COG5	Conserved oligomeric Golgi complex subunit 5	Q9UP83-3;Q9UP83;Q9UP83-2	23.5946	23.381	23.1432	24.1399	23.7207		-0.213634	0.956136		-0.451393	0.864792		0.545279	0.702408		0.126068	0.943056		-0.237759	0.950325		0.758913	0.860486		0.339702	0.915075		0.907248		24.1946	22.8088	23.7805	24.5165	21.0453	24.5812	22.8004	22.6018	24.0275	24.2168	23.9495	24.2535	24.0359	24.4738	22.6524
COL6A3	Collagen alpha-3(VI) chain	E7ENL6;E9PCV6;E9PFQ6;P12111-2;P12111;P12111-3;E9PGQ9	23.6196	23.2261	24.2018	23.9208	23.7796		0	0		0.582204	0.850923		0.30125	0.875266		0.159992	0.930422		0.97566	0.364652		0.694706	0.555005		0.553448	0.609472		0.708721		22.6467	23.5606	24.6515	23.2936	23.1157	23.2692	24.1488	23.5594	24.8972	24.2096	24.2096	23.3434	22.9206	24.2463	24.1719
COLGALT1	Procollagen galactosyltransferase 1	Q8NBJ5;E9PC06	24.6581	24.4188	24.5537	24.6658	24.4363		-0.239312	0.667495		-0.104424	0.939254		0.00767899	0.989465		-0.221824	0.778733		0.134888	0.843742		0.246991	0.588739		0.0174885	0.985076		0.8869		24.6918	24.3376	24.945	24.2821	24.4105	24.5638	24.8576	24.0854	24.7182	24.5285	24.6209	24.8481	23.9225	24.7995	24.5869
COMMD2	COMM domain-containing protein 2	F8WBW1;Q86X83	23.618	23.3308	23.8499	23.726	22.3791		-0.287224	0.84796		0.231802	0.89223		0.107955	0.923064		-1.23899	0.569696		0.519026	0.697069		0.395179	0.835595		-0.951763	0.678184		0.522582		23.4277	23.2319	24.1946	23.2603	22.5375	24.1946	23.2671	23.9933	24.2891	23.4448	23.6757	24.0575	22.2216	21.1324	23.7831
COMMD3	COMM domain-containing protein 3	Q9UBI1;H0Y4E5;Q5T8Z0;H0Y4W0	24.5165	23.0514	23.8843	23.9482	24.9295		-1.46514	0.52237		-0.632185	0.888187		-0.56826	0.850716		0.413049	0.593501		0.832955	0.774794		0.89688	0.823303		1.87819	0.328732		0.663765		24.019	24.8764	24.654	23.7179	23.2477	22.1885	25.2096	24.7024	21.741	24.8764	21.9492	25.019	25.2021	24.6595	24.9271
COMMD5	COMM domain-containing protein 5	Q9GZQ3;H0YEQ6;E9PJE4	25.5265	23.1564	25.377	25.4103	25.3401		-2.37004	0.47154		-0.149476	0.92836		-0.116191	0.934666		-0.186349	0.839475		2.22057	0.2193		2.25385	0.536424		2.18369	0.28318		0.0827197		26.2077	25.0105	25.3612	22.5094	22.9839	23.976	25.1833	25.5404	25.4073	25.2354	25.1214	25.8741	25.1488	25.558	25.3135
COMMD8	COMM domain-containing protein 8	Q9NX08	24.063	23.2778	23.694	24.4253	24.5145		-0.78522	0.745156		-0.369074	0.932925		0.362263	0.848792		0.451432	0.776034		0.416146	0.885653		1.14748	0.618921		1.23665	0.470128		0.686229		24.7995	22.7913	24.5983	22.354	22.9099	24.5696	24.1642	24.6703	22.2473	24.5404	24.3844	24.3511	24.5165	24.5285	24.4984
COMMD9	COMM domain-containing protein 9	Q9P000;B4DQW0;Q9P000-2	25.915	25.9127	26.2239	25.9368	26.0424		-0.00236003	0.997509		0.308905	0.801325		0.0217527	0.970674		0.127332	0.742805		0.311265	0.503957		0.0241127	0.952636		0.129692	0.673851		0.599331		25.8788	25.6944	26.1719	25.726	26.0317	25.9803	26.1908	25.9495	26.5315	26.0505	25.8215	25.9383	26.1927	25.9716	25.9628
COMT	Catechol O-methyltransferase	P21964-2;P21964;E7EMS6;F8WBW9;E7EUU8	25.8132	26.3054	26.1243	26.1924	26.4717		0.492153	0.690626		0.31106	0.884745		0.379154	0.782758		0.658489	0.569042		-0.181093	0.811961		-0.113	0.87313		0.166336	0.452585		0.678434		25.0567	26.5638	25.8191	26.1719	26.3049	26.4394	26.6865	25.8288	25.8576	26.1738	25.8973	26.506	26.4629	26.4629	26.4892
COPA	Coatomer subunit alpha;Xenin;Proxenin	P53621;P53621-2	30.4822	30.3052	30.5535	30.6364	30.58		-0.177078	0.557415		0.0712999	0.820852		0.154151	0.616909		0.0978203	0.511548		0.248378	0.303385		0.33123	0.543534		0.274899	0.373909		0.234631		30.4629	30.4823	30.5014	30.393	30.1604	30.362	30.5014	30.611	30.5481	30.5014	30.7533	30.6544	30.611	30.6372	30.4919
COPB1	Coatomer subunit beta	P53618	29.687	29.9072	29.8476	29.9052	29.8505		0.220193	0.543296		0.16064	0.804565		0.218169	0.619949		0.163514	0.548089		-0.0595525	0.847364		-0.0020237	0.999993		-0.0566781	0.798945		0.583713		29.5499	29.8096	29.7014	29.8173	30.0479	29.8564	30.0084	29.7096	29.8249	29.7692	29.8726	30.0737	29.8945	29.7453	29.9117
COPB2	Coatomer subunit beta	B4DZI8;P35606	29.5231	29.7967	29.662	29.7968	29.8432		0.273586	0.549458		0.13895	0.822791		0.27375	0.627765		0.320101	0.459534		-0.134636	0.256483		0.000164668	1		0.0465151	0.727736		0.32545		29.3088	29.6389	29.6216	29.7629	29.7708	29.8564	29.6595	29.6285	29.6981	29.5951	29.8415	29.9539	29.7645	29.8534	29.9117
COPE	Coatomer subunit epsilon	F5H1E1;O14579;O14579-2;A6NE29	28.4901	28.7951	28.8199	28.9796	28.933		0.305052	0.615142		0.329858	0.799651		0.489489	0.608813		0.442973	0.550088		0.0248063	0.928167		0.184437	0.662959		0.137921	0.726753		0.452676		28.3745	28.8741	28.2216	28.7958	28.7096	28.8799	28.9787	28.7389	28.7421	28.7958	28.9539	29.189	29.1361	29.0137	28.6492
COPG1	Coatomer subunit gamma-1	Q9Y678	29.3255	29.52	29.6021	29.6343	29.5201		0.19453	0.480041		0.276617	0.489386		0.308822	0.571195		0.194667	0.368903		0.0820866	0.619613		0.114292	0.790556		0.000136693	1		0.294504		29.2781	29.3766	29.3217	29.5591	29.4093	29.5916	29.5184	29.6216	29.6663	29.4254	29.7146	29.7629	29.4938	29.5222	29.5444
COPG2	Coatomer subunit gamma-2	Q9UBF2	27.5195	27.768	27.61	27.7381	27.8058		0.248482	0.487199		0.0904833	0.88022		0.218623	0.644803		0.286252	0.393238		-0.157998	0.649621		-0.0298589	0.948812		0.0377706	0.823359		0.506259		27.5463	27.4154	27.5969	27.6865	27.726	27.8916	27.611	27.8445	27.3745	27.8081	27.509	27.8973	27.7895	27.7833	27.8445
COPS2	COP9 signalosome complex subunit 2	P61201;P61201-2;B4DIH5	28.8884	29.1454	29.0971	29.0407	29.142		0.256944	0.631612		0.208649	0.821242		0.152251	0.759291		0.253638	0.561597		-0.0482947	0.897334		-0.104693	0.829376		-0.00330607	0.991907		0.623797		29.099	28.604	28.9622	29.2007	28.9288	29.3066	28.995	29.2354	29.0608	29.0453	28.9259	29.1507	29.1628	29.2285	29.0349
COPS3	COP9 signalosome complex subunit 3	Q9UNS2	28.2185	28.1575	28.3632	28.4654	28.3171		-0.0609964	0.865941		0.144704	0.845023		0.246953	0.643264		0.0985928	0.797841		0.205701	0.461288		0.30795	0.5398		0.159589	0.587856		0.522087		28.1984	28.0296	28.4274	28.1312	28.0608	28.2803	28.4746	28.1795	28.4354	28.3109	28.4707	28.6146	28.3066	28.1507	28.4938
COPS4	COP9 signalosome complex subunit 4	Q9BT78;D6RFN0;D6RAX7;B3KST5;D6RD63	28.5389	28.7594	28.6064	28.6152	28.5549		0.220537	0.541109		0.0675042	0.893861		0.0763251	0.777852		0.0160109	0.953028		-0.153033	0.59718		-0.144212	0.642492		-0.204526	0.45998		0.601834		28.6216	28.604	28.391	28.8973	28.7453	28.6355	28.5573	28.4629	28.7989	28.5165	28.6798	28.6492	28.5315	28.6898	28.4433
COPS5	COP9 signalosome complex subunit 5	Q92905	27.6736	27.1293	27.7549	27.5134	27.706		-0.544223	0.543292		0.0813033	0.920697		-0.160196	0.778698		0.0324217	0.94338		0.625526	0.315423		0.384027	0.584476		0.576645	0.389434		0.304467		27.9259	27.3494	27.7453	26.7518	27.3828	27.2535	27.6389	27.6998	27.9259	27.5463	27.3828	27.611	27.6998	27.8142	27.604
COPS6	COP9 signalosome complex subunit 6	E7EM64;Q7L5N1	27.9044	27.9342	27.768	28.0842	28.0169		0.0297661	0.943841		-0.136415	0.79534		0.179754	0.614124		0.112528	0.549221		-0.166181	0.649147		0.149988	0.786249		0.0827618	0.823536		0.467098		27.9539	27.9089	27.8504	27.8682	28.189	27.7453	27.8142	27.8858	27.604	27.9372	28.189	28.1263	28.0505	28.0914	27.9089
COPS7A	COP9 signalosome complex subunit 7a	Q9UBW8;F5GYF7;F5H248;F5H7C6;F5H4U8	26.5443	26.7808	26.8194	26.798	26.9028		0.236501	0.669056		0.275106	0.810456		0.253656	0.606603		0.358476	0.43935		0.0386054	0.946612		0.0171553	0.979806		0.121975	0.785629		0.51535		26.3695	26.6595	26.604	26.452	27.0401	26.8504	26.726	26.9428	26.7895	26.6458	26.8741	26.8741	26.9089	26.8019	26.9977
COPS7B	COP9 signalosome complex subunit 7b	Q9H9Q2;Q9H9Q2-3;Q9H9Q2-2	26.0092	26.1623	26.328	26.2911	26.059		0.153043	0.745884		0.318823	0.80456		0.281863	0.629225		0.0497761	0.915998		0.16578	0.700872		0.12882	0.77907		-0.103267	0.794442		0.585031		26.0296	26.2463	25.7518	26.3031	25.9428	26.2408	26.4676	26.4785	26.038	26.1814	26.2926	26.3992	26.1075	25.8433	26.2262
COPS8	COP9 signalosome complex subunit 8	Q99627;E9PGT6;B8ZZP3;Q99627-2;H7C3S9	27.4405	27.3235	27.6017	27.8033	27.5748		-0.117047	0.748559		0.161142	0.838132		0.362748	0.578947		0.134245	0.653797		0.278189	0.446385		0.479795	0.559056		0.251292	0.555058		0.282117		27.3494	27.4707	27.5014	27.4234	27.0608	27.4862	27.6181	27.6931	27.4938	27.7453	27.8081	27.8564	27.7518	27.3828	27.5898
COPZ1	Coatomer subunit zeta-1	F8VVA7;P61923;F8VWL5;F8VYZ4;F8VS17;F8VXB1;F8VUC5;F8W156	27.2112	27.6994	27.3263	27.5167	27.6646		0.488279	0.546476		0.115113	0.888565		0.305564	0.715478		0.453468	0.565428		-0.373166	0.309117		-0.182715	0.807289		-0.034811	0.962093		0.521359		26.9316	27.5609	27.141	27.7389	27.8504	27.509	27.4154	27.189	27.3745	27.3066	27.3578	27.8858	27.5014	27.391	28.1015
CORO1A	Coronin-1A;Coronin	P31146;H3BRY3	32.8868	33.0814	32.968	32.975	33.0575		0.194579	0.547028		0.0812467	0.895342		0.0882352	0.850261		0.170664	0.510668		-0.113332	0.769177		-0.106344	0.85736		-0.0239143	0.907882		0.808027		33.0017	32.7868	32.8719	33.1223	33.1679	32.9539	33.1254	33.0927	32.686	33.2178	32.9882	32.7191	33.1115	33.1052	32.9557
CORO1B	Coronin-1B;Coronin	Q9BR76;F5H390;H0Y3L6;E7EW44	30.778	30.9135	30.8409	31.0416	30.9745		0.135548	0.69058		0.0629215	0.922323		0.263629	0.673402		0.196498	0.556002		-0.0726261	0.738957		0.128082	0.795856		0.06095	0.468968		0.599026		30.5573	30.8157	30.9609	30.9188	30.8608	30.9609	30.9539	30.8973	30.6714	30.7849	31.0864	31.2535	30.995	30.947	30.9814
CORO1C	Coronin-1C;Coronin	Q9ULV4;A7MAP0;B4E3S0;H0YHL7	33.7005	33.763	33.6223	33.78	33.7759		0.0625089	0.72185		-0.0781771	0.789609		0.0795212	0.69418		0.0754395	0.657233		-0.140686	0.433357		0.0170123	0.948793		0.0129306	0.958096		0.494661		33.7653	33.6522	33.684	33.7653	33.8608	33.6629	33.6735	33.6522	33.5412	33.87	33.7047	33.7653	33.8792	33.6735	33.7751
CORO7	Coronin-7;Coronin	P57737-2;P57737;I3L416;I3L167	25.1769	25.1183	25.5929	25.3441	25.2255		-0.0586497	0.891147		0.416038	0.810676		0.167159	0.771682		0.0485973	0.9167		0.474688	0.207983		0.225808	0.641741		0.107247	0.764567		0.355666		25.1055	24.989	25.4362	25.0732	25.0317	25.2499	25.4738	25.7441	25.5609	25.4953	25.0975	25.4394	25.0608	25.4707	25.1449
COTL1	Coactosin-like protein	Q14019;H3BT58	31.7449	31.7412	31.7726	31.8563	31.689		-0.00374095	0.997195		0.0276775	0.989711		0.111407	0.942376		-0.055933	0.963659		0.0314185	0.936105		0.115148	0.828729		-0.0521921	0.886604		0.991799		32.0544	30.8608	32.3196	31.4967	31.9188	31.8081	31.7453	31.8271	31.7453	31.7413	31.8497	31.978	31.6714	31.5799	31.8157
COX5A	Cytochrome c oxidase subunit 5A, mitochondrial	P20674;H3BRM5;H3BV69;H3BNX8	25.3115	26.6308	25.9534	26.5308	25.5142		1.31924	0.664448		0.641851	0.891211		1.21926	0.711794		0.202655	0.966788		-0.677393	0.678027		-0.0999845	0.933173		-1.11659	0.769828		0.855644		23.3354	26.228	26.3712	26.019	27.1604	26.7129	26.976	26.0296	24.8546	26.4984	26.5419	26.5522	26.3811	22.6005	27.5609
COX5B	Cytochrome c oxidase subunit 5B, mitochondrial	P10606	25.5507	23.6667	26.1619	26.014	26.3746		-1.88401	0.609156		0.611202	0.810487		0.463303	0.683212		0.823882	0.435401		2.49521	0.432829		2.34731	0.583655		2.70789	0.433057		0.319342		25.5898	25.6486	25.4138	23.4308	21.7897	25.7796	26.4754	25.2714	26.7389	26.3712	26.2996	25.3712	26.1681	26.7895	26.1661
COX6B1	Cytochrome c oxidase subunit 6B1	P14854	28.8165	29.3128	28.9801	29.3211	29.5974		0.496317	0.484302		0.163554	0.844384		0.504604	0.568482		0.780917	0.427639		-0.332763	0.422516		0.00828679	0.988964		0.2846	0.652062		0.285201		28.6561	28.9977	28.7958	29.158	29.4804	29.3001	29.2399	28.8203	28.8799	29.196	29.21	29.5573	29.8188	29.141	29.8324
COX7A2	Cytochrome c oxidase subunit 7A2, mitochondrial	D6RIE3;D6RGV5;P14406	25.613	25.544	26.5215	26.5767	26.8675		-0.0689557	0.976715		0.908508	0.668656		0.963685	0.586238		1.25455	0.381992		0.977464	0.614081		1.03264	0.722314		1.32351	0.528609		0.454604		25.7364	25.705	25.3975	26.0211	26.6595	23.9514	26.6865	26.1391	26.7389	27.1604	26.4266	26.143	26.7129	27.1507	26.7389
CP	Ceruloplasmin	E9PFZ2;P00450;H7C5R1	26.5658	26.055	26.4422	25.9769	26.0134		-0.510789	0.548891		-0.12361	0.894252		-0.588867	0.655509		-0.552365	0.564888		0.387179	0.320994		-0.0780773	0.942258		-0.0415757	0.963007		0.52776		27.019	26.3545	26.3239	25.8599	26.3031	26.002	26.3992	26.4738	26.4536	25.8694	25.5404	26.521	25.5014	26.4234	26.1154
CPNE1	Copine-1	Q99829;A6PVH9;F2Z2V0;E7ENH5;Q5JX58;Q5JX59;Q5JX60;Q5JX44;Q5JX56;Q5JX55;Q5JX45	29.3469	28.9251	29.4959	29.3096	29.3945		-0.421798	0.4797		0.148956	0.692685		-0.0373821	0.894124		0.0475667	0.903504		0.570754	0.215528		0.384416	0.548947		0.469365	0.436638		0.266902		29.3724	29.3001	29.3683	29.027	28.6697	29.0788	29.5315	29.5109	29.4453	29.1288	29.4274	29.3724	29.1337	29.6527	29.3971
CPNE2	Copine-2	Q96FN4;Q719H8	26.2039	24.8997	25.967	25.9904	25.9329		-1.30427	0.664906		-0.236987	0.843341		-0.213506	0.789929		-0.27103	0.712009		1.06728	0.651126		1.09076	0.760782		1.03324	0.694907		0.636915		25.9803	25.945	26.6865	25.8858	22.8727	25.9406	25.9517	25.9111	26.038	25.9628	25.7695	26.239	26.0211	26.1623	25.6153
CPNE3	Copine-3	O75131;E5RG68	29.4677	29.1739	29.6892	29.5404	29.6501		-0.293793	0.4515		0.221464	0.473125		0.0726687	0.757401		0.182336	0.516242		0.515257	0.0936999		0.366461	0.527823		0.476128	0.247757		0.0699671		29.389	29.5071	29.5071	29.1556	29.1015	29.2647	29.673	29.6931	29.7014	29.4194	29.5646	29.6372	29.57	29.8066	29.5736
CPOX	Oxygen-dependent coproporphyrinogen-III oxidase, mitochondrial	P36551	24.6931	24.927	24.7609	24.8546	24.6657		0.233976	0.553474		0.067873	0.96168		0.161521	0.775095		-0.0273806	0.971339		-0.166103	0.806146		-0.0724557	0.908826		-0.261357	0.705064		0.905915		24.632	24.5522	24.895	24.8044	24.945	25.0317	25.1174	24.275	24.8904	25.1757	24.7286	24.6595	24.48	25.1795	24.3376
CPPED1	Serine/threonine-protein phosphatase CPPED1	Q9BRF8;Q9BRF8-2	25.6296	26.334	26.1124	26.0642	26.2422		0.704395	0.72804		0.482729	0.867172		0.434529	0.839017		0.612542	0.733361		-0.221666	0.794027		-0.269866	0.844958		-0.0918535	0.913792		0.823226		25.989	24.2678	26.632	26.189	26.9089	25.9043	26.0935	26.3695	25.8741	25.8927	26.4831	25.8166	26.2535	26.5014	25.9716
CPT1A	Carnitine O-palmitoyltransferase 1, liver isoform	P50416;P50416-2	24.2708	24.672	24.9563	25.3497	25.4715		0.401164	0.855356		0.68549	0.84516		1.07885	0.676138		1.20068	0.561865		0.284325	0.722953		0.677684	0.583932		0.799517	0.438383		0.5121		22.8141	25.275	24.7234	24.019	25.0608	24.9361	25.0401	25.0443	24.7846	25.5135	25.2856	25.2499	25.5926	25.5014	25.3205
CPT2	Carnitine O-palmitoyltransferase 2, mitochondrial	P23786	25.4803	23.9777	25.2993	25.5828	25.4127		-1.5026	0.546236		-0.180964	0.875685		0.10251	0.907674		-0.0676575	0.900235		1.32164	0.442741		1.60511	0.555904		1.43494	0.444057		0.303554		25.632	25.1332	25.6757	25.2501	23.3403	23.3428	25.2607	24.9271	25.7103	25.6237	25.1642	25.9606	25.4583	25.5926	25.1871
CRAT	Carnitine O-acetyltransferase	P43155-2;P43155;C9JBD1;P43155-3	25.772	25.7332	26.0793	26.2445	26.2265		-0.0387891	0.936089		0.307267	0.813143		0.472519	0.577053		0.454461	0.475674		0.346056	0.321352		0.511308	0.45688		0.49325	0.351829		0.247039		25.5433	26.0338	25.7389	25.7695	25.8093	25.6209	26.2607	25.902	26.0752	26.3307	26.1015	26.3014	26.3662	26.3307	25.9825
CRBN	Protein cereblon	F5H3U1;Q96SW2-2;Q96SW2	24.6798	24.7316	23.6465	25.0195	24.7329		0.0517775	0.954244		-1.03327	0.829233		0.339664	0.759005		0.0530821	0.943272		-1.08504	0.595552		0.287886	0.745558		0.00130463	0.997279		0.55697		24.6971	25.1253	24.217	24.5638	24.7129	24.918	24.4738	24.5754	21.8904	24.6757	25.4738	24.9089	24.9628	24.6376	24.5983
CRELD2	Cysteine-rich with EGF-like domain protein 2	Q6UXH1-4;Q6UXH1;Q6UXH1-6;Q6UXH1-5;A6PWM2;Q6UXH1-3;Q6UXH1-2	24.9175	25.2175	24.8418	25.2738	25.1573		0.299999	0.713415		-0.0757052	0.964068		0.356285	0.713533		0.239814	0.798593		-0.375704	0.489072		0.0562859	0.933124		-0.0601851	0.937777		0.695564		24.8433	25.417	24.4923	25.3778	24.9406	25.3342	25.1015	24.5105	24.9134	25.0233	25.417	25.3811	25.4425	24.6649	25.3645
CRK	Adapter molecule crk	P46108	25.5448	25.3489	25.3073	25.677	25.6628		-0.195819	0.719177		-0.237451	0.824206		0.132241	0.826473		0.118	0.827405		-0.0416323	0.876791		0.32806	0.531514		0.313819	0.436785		0.437571		25.9157	25.3844	25.3342	25.3877	25.1946	25.4645	25.3342	25.2133	25.3745	25.5014	25.8166	25.7129	25.4551	25.8361	25.6971
CRKL	Crk-like protein	P46109	29.1825	29.2146	29.2542	29.1803	29.2649		0.0320772	0.940947		0.0717074	0.907009		-0.00218836	0.992482		0.0823739	0.739332		0.0396303	0.935135		-0.0342655	0.948605		0.0502968	0.862773		0.972059		29.019	29.2285	29.3001	29.267	29.3578	29.019	29.3807	29.0137	29.3683	29.0322	29.1015	29.4073	29.326	29.1556	29.3131
CRLF3	Cytokine receptor-like factor 3	Q8IUI8;B4DJU5	29.6227	29.8789	29.6198	30.0842	29.8845		0.256241	0.720014		-0.00287056	0.997646		0.461503	0.63328		0.261772	0.711522		-0.259111	0.449821		0.205262	0.674492		0.00553131	0.991784		0.506564		29.588	30.0608	29.2193	30.0737	29.6964	29.8667	29.7581	29.6268	29.4746	29.94	30.2647	30.0479	30.0217	29.5969	30.0349
CRTAP	Cartilage-associated protein	C9JP16;Q8NB01;O75718;B3KQR7;B3KUP0	25.4642	25.7209	25.5721	25.8743	25.1943		0.256716	0.537431		0.107864	0.903804		0.410114	0.59658		-0.269898	0.822604		-0.148853	0.771232		0.153398	0.767722		-0.526615	0.665296		0.635358		25.6153	25.3443	25.433	25.6237	25.7103	25.8288	25.3745	25.3745	25.9672	26.1253	25.6568	25.8409	24.2535	25.6403	25.6891
CRYL1	Lambda-crystallin homolog	Q9Y2S2-2;Q9Y2S2	26.6023	27.0776	27.1141	27.2745	27.096		0.475285	0.702944		0.511791	0.823286		0.672186	0.663955		0.493711	0.650315		0.036506	0.966157		0.196901	0.861575		0.0184263	0.982719		0.649065		27.3494	26.4598	25.9977	27.2445	26.673	27.3153	27.4473	26.8973	26.9977	27.2803	26.8973	27.6458	27.3066	26.8019	27.1795
CRYZ	Quinone oxidoreductase	Q08257;A6NN60;A6NP24;C9JH92;Q08257-2	26.3839	26.8099	26.8067	26.8313	26.8305		0.425999	0.788278		0.422848	0.864834		0.4474	0.780372		0.446613	0.758491		-0.00315094	0.997356		0.0214005	0.984083		0.020614	0.988375		0.883892		26.8019	25.3307	27.019	26.6865	27.2803	26.4629	26.6458	27.2077	26.5667	26.8504	26.9977	26.6458	26.8741	27.2714	26.346
CRYZL1	Quinone oxidoreductase-like protein 1	O95825;A6NMA8;A6NND8;A6NHJ8;C9K0F7;H7C3I5;B3KQ77;C9JAL0	26.5128	26.6903	26.6959	26.7656	26.9512		0.177472	0.730137		0.183064	0.864126		0.252783	0.735115		0.438353	0.553731		0.00559107	0.992702		0.075311	0.872798		0.260881	0.552444		0.636602		26.4661	26.8741	26.1984	26.7129	26.632	26.726	26.8858	26.8142	26.3877	26.632	26.6458	27.019	26.8385	26.726	27.2891
CS	Citrate synthase;Citrate synthase, mitochondrial	B4DJV2;O75390	29.1019	28.9816	29.1997	29.4108	29.5968		-0.120361	0.825181		0.0977268	0.845525		0.308819	0.614785		0.494855	0.448345		0.218088	0.665996		0.42918	0.585252		0.615217	0.428488		0.320701		29.0427	29.21	29.0531	28.7549	29.3787	28.8112	29.3174	29.0349	29.2467	29.6233	29.2262	29.3828	29.4314	29.9117	29.4473
CSDE1	Cold shock domain-containing protein E1	E9PGZ0;G5E9Q2;O75534-2;O75534;E9PLT0	25.8548	26.0004	24.9295	25.8008	25.7206		0.145629	0.738754		-0.925278	0.845902		-0.0540549	0.9602		-0.134213	0.740598		-1.07091	0.64988		-0.199684	0.83677		-0.279842	0.296238		0.730693		26.1757	25.7103	25.6784	25.9869	25.9271	26.0874	25.9716	25.8973	22.9197	26.2643	25.3811	25.7569	25.6703	25.797	25.6944
CSE1L	Exportin-2	P55060-3;P55060;F8W904;B4DUC5;E7EPX1	29.1361	29.0412	29.157	29.198	29.1328		-0.0948925	0.665381		0.0208906	0.95972		0.0619265	0.869156		-0.00331624	0.989001		0.115783	0.375184		0.156819	0.673371		0.0915763	0.707728		0.799321		29.1937	28.9977	29.217	29.094	28.9896	29.0401	29.1065	29.1337	29.2308	29.1065	29.0762	29.4113	29.0839	29.3088	29.0057
CSK	Tyrosine-protein kinase CSK	P41240;E7EQW6	30.482	30.4875	30.4622	30.3827	30.5201		0.0054938	0.98259		-0.0198294	0.971468		-0.0993188	0.749954		0.0381387	0.833526		-0.0253232	0.923175		-0.104813	0.694207		0.0326449	0.769563		0.75428		30.5754	30.341	30.5296	30.5296	30.5296	30.4032	30.5481	30.3088	30.5296	30.3724	30.2647	30.5109	30.5389	30.4919	30.5296
CSNK1A1	Casein kinase I isoform alpha	P48729;Q71TU5;P48729-2;E5RG27;D6RGE5	24.1711	23.5425	23.4061	23.7094	23.5643		-0.62856	0.47835		-0.764948	0.667393		-0.46169	0.735564		-0.606791	0.472658		-0.136388	0.590396		0.16687	0.910164		0.0217698	0.973342		0.502758		24.3712	24.275	23.867	23.632	23.4551	23.5404	23.3239	23.2961	23.5983	23.4676	23.1584	24.5021	23.417	23.9383	23.3376
CSNK2A1	Casein kinase II subunit alpha	E7EU96;Q5U5J2;P68400;P68400-2	27.252	27.2147	27.0792	27.3407	27.3559		-0.0373116	0.920674		-0.172759	0.831047		0.0887375	0.777098		0.103873	0.747357		-0.135447	0.650315		0.126049	0.579154		0.141184	0.572357		0.505484		27.1214	27.1795	27.4551	27.3239	27.1312	27.189	27.189	26.8504	27.1984	27.3153	27.3325	27.3745	27.189	27.4314	27.4473
CSNK2A2	Casein kinase II subunit alpha	P19784;H3BSA1;H3BV19	27.5603	27.5127	27.5478	27.5918	27.5342		-0.0476087	0.902729		-0.0125421	0.97191		0.0314744	0.878374		-0.0260957	0.923086		0.0350666	0.92392		0.0790831	0.85592		0.021513	0.959161		0.969191		27.4314	27.5969	27.6527	27.5165	27.3153	27.7064	27.4938	27.5315	27.6181	27.5536	27.5898	27.632	27.4862	27.6931	27.4234
CSNK2B	Casein kinase II subunit beta	Q5SRQ6;P67870;Q5SRQ3	24.2135	25.1706	25.1655	25.5332	25.6876		0.957088	0.729979		0.951928	0.842882		1.31963	0.704397		1.47408	0.582212		-0.00516001	0.995667		0.362539	0.688076		0.516992	0.512602		0.564967		25.3612	22.1981	25.0813	25.317	24.6486	25.5463	25.1795	25.1488	25.1681	25.5135	25.5754	25.5105	25.8881	25.3679	25.8069
CSRP1	Cysteine and glycine-rich protein 1	P21291;B3KVC9;E9PS42;E9PND2;E9PP21	32.002	32.0519	32.0581	32.2135	32.3138		0.0499102	0.850258		0.0561422	0.889105		0.211516	0.62229		0.311821	0.427515		0.00623194	0.955129		0.161606	0.547871		0.261911	0.172497		0.207376		31.8234	32.0283	32.1544	32.0184	32.0447	32.0927	32.0348	32.1146	32.025	32.1544	32.2048	32.2814	32.2842	32.3594	32.2979
CST3	Cystatin-C	P01034	23.6936	22.5501	23.2524	23.416	23.8232		-1.14354	0.617459		-0.44128	0.919692		-0.277586	0.92415		0.129547	0.948456		0.702261	0.722515		0.865955	0.707465		1.27309	0.448067		0.754996		24.114	24.5225	22.4444	23.0144	22.7453	21.8906	23.6907	21.7703	24.2961	22.4573	23.2096	24.5812	24.5344	22.9317	24.0034
CTBP1	C-terminal-binding protein 1	Q13363-2;Q13363;D6RAX2;E7ESU7;E7EPF8;E9PGB1	26.2298	25.1278	26.2789	26.2581	26.1454		-1.10203	0.706269		0.049085	0.957857		0.0283127	0.928082		-0.0844103	0.868198		1.15111	0.643676		1.13034	0.759149		1.01762	0.708012		0.662153		26.2643	26.2571	26.1681	23.0686	26.4908	25.824	26.0813	26.1234	26.632	26.1075	26.2499	26.417	25.7286	26.3975	26.3101
CTDSPL	CTD small phosphatase-like protein	O15194-2;O15194;H7C2S4	23.0094	23.3239	23.4	23.6946	23.2866		0.314499	0.857381		0.390635	0.903916		0.685272	0.780384		0.277205	0.843087		0.0761363	0.969637		0.370773	0.88151		0	0		0.931632		22.3078	22.595	24.1253	23.9706	23.1199	22.8811	23.5285	22.4325	24.239	22.6269	23.7389	24.7182	23.1484	23.2779	23.4335
CTGF	Connective tissue growth factor	P29279;P29279-2	27.61	27.7694	27.1818	27.168	27.2052		0.159422	0.856825		-0.428218	0.810298		-0.441973	0.713431		-0.404722	0.656898		-0.58764	0.355371		-0.601395	0.627993		-0.564143	0.536962		0.559717		27.3992	28.0813	27.3494	27.5898	28.217	27.5014	27.2535	27.141	27.1507	26.604	27.391	27.509	26.8973	26.9539	27.7645
CTNND1	Catenin delta-1	E9PIE5;C9JZR2;F8WA43;O60716-8;O60716-7;O60716-5;O60716-3;O60716-6;O60716-4;O60716-2;O60716;O60716-24;O60716-23;O60716-21;O60716-19;O60716-22;O60716-20;O60716-16;O60716-18;O60716-15;O60716-17;O60716-13;O60716-11;O60716-14;O60716-12;O60716-10;O60716-9;O60716-32;O60716-31;O60716-29;O60716-27;O60716-30;O60716-28;O60716-26;O60716-25	26.3091	26.1574	26.3677	26.0686	26.173		-0.151666	0.789355		0.058623	0.939532		-0.240475	0.675482		-0.136148	0.776303		0.210289	0.583979		-0.0888093	0.879913		0.0155182	0.979442		0.655079		26.5624	26.0359	26.329	26.3828	26.2225	25.867	26.239	26.4138	26.4504	26.0874	25.9428	26.1757	26.141	26.391	25.9869
CTPS1	CTP synthase 1	P17812;B4DR64	28.7333	28.6814	28.9516	28.9447	28.9236		-0.0518754	0.921471		0.218321	0.764795		0.211391	0.593121		0.190335	0.548907		0.270196	0.492414		0.263266	0.640382		0.24221	0.583667		0.466974		28.7195	28.6389	28.8415	28.8445	28.8294	28.3704	28.9567	28.8712	29.027	28.877	28.9117	29.0453	28.7581	28.9622	29.0505
CTPS2	CTP synthase 2	Q9NRF8	27.7329	27.5601	27.8476	27.8063	27.8307		-0.172774	0.588593		0.11474	0.80399		0.0733935	0.875148		0.0977847	0.668413		0.287514	0.257585		0.246168	0.644362		0.270559	0.375199		0.471969		27.7453	27.5969	27.8564	27.6663	27.4314	27.5826	27.7895	27.9089	27.8445	27.6798	27.6527	28.0864	27.9202	27.8264	27.7453
CTSA	Lysosomal protective protein;Lysosomal protective protein 32 kDa chain;Lysosomal protective protein 20 kDa chain	P10619;Q5JZH0	29.2011	29.4861	29.1604	29.6452	29.3445		0.285004	0.837818		-0.0407333	0.985616		0.444079	0.764996		0.143354	0.90802		-0.325738	0.625935		0.159075	0.877883		-0.141651	0.841433		0.79644		28.6595	30.1115	28.8324	29.3023	29.9814	29.1747	29.4254	29.1214	28.9344	29.6458	29.4113	29.8785	29.2193	29.2262	29.588
CTSC	Dipeptidyl peptidase 1;Dipeptidyl peptidase 1 exclusion domain chain;Dipeptidyl peptidase 1 heavy chain;Dipeptidyl peptidase 1 light chain	F5HGG6;P53634	27.8057	28.1742	28.214	28.172	28.0762		0.36854	0.500506		0.408264	0.819536		0.366311	0.809878		0.270512	0.448032		0.0397237	0.953716		-0.00222905	0.999813		-0.0980282	0.768002		0.470712		27.8142	27.6998	27.9031	28.2308	28.3325	27.9595	28.3787	27.8081	28.4551	28.2354	28.2354	28.0453	28.0349	28.2123	27.9814
CTSD	Cathepsin D;Cathepsin D light chain;Cathepsin D heavy chain	P07339;H7C469;H7C1V0;C9JH19	28.3546	28.7304	28.6137	28.5455	28.6814		0.375873	0.552203		0.25915	0.80854		0.190933	0.78769		0.32682	0.564607		-0.116723	0.675752		-0.18494	0.791936		-0.0490526	0.895091		0.637297		28.1507	28.6595	28.2535	28.6798	28.7096	28.8019	28.8264	28.4394	28.5754	28.7453	28.1652	28.726	28.9512	28.6146	28.4785
CTSW	Cathepsin W	P56202;E9PI30	27.2966	27.8606	27.8339	27.3735	27.6907		0.564049	0.744822		0.537326	0.851027		0.0768986	0.978476		0.394074	0.819538		-0.0267232	0.963884		-0.48715	0.55669		-0.169975	0.800035		0.784722		26.4831	28.5682	26.8385	27.6389	28.141	27.8019	27.7645	27.7129	28.0243	27.0505	27.5609	27.509	27.2625	27.7958	28.0137
CTTN	Src substrate cortactin	Q14247	32.2492	32.5027	32.3115	32.3501	32.4064		0.253553	0.518985		0.0623436	0.880914		0.100903	0.778742		0.157251	0.549626		-0.191209	0.271205		-0.15265	0.584399		-0.096302	0.325086		0.369543		32.4108	32.2222	32.1146	32.5132	32.5296	32.4654	32.3568	32.2106	32.3672	32.4605	32.3879	32.2019	32.4159	32.375	32.4284
CUL1	Cullin-1	Q13616;E7EWR0;B3KTW0	25.9715	24.4726	25.9892	25.8939	26.126		-1.4989	0.590299		0.0177224	0.982546		-0.0776596	0.90022		0.154521	0.738868		1.51662	0.478515		1.42124	0.640423		1.65342	0.468673		0.362476		25.8409	25.8457	26.228	22.7748	24.989	25.654	25.9716	25.9271	26.0691	26.1871	25.6181	25.8764	26.3494	25.8741	26.1546
CUL2	Cullin-2	Q13617;G3V1S2;Q5T2B7;Q5T2B5	27.7721	27.7879	27.7647	27.9957	27.8639		0.0158513	0.959323		-0.00732613	0.984321		0.223588	0.626115		0.0918465	0.594246		-0.0231775	0.942032		0.207737	0.674472		0.0759951	0.779503		0.532747		27.7064	27.7895	27.8203	27.8916	27.604	27.8682	27.8504	27.7708	27.673	27.7645	28.0864	28.1361	27.7645	27.965	27.8623
CUL3	Cullin-3	Q13618-2;Q13618;Q13618-3	27.874	27.6704	27.8199	27.9472	27.8278		-0.2036	0.674613		-0.0541401	0.940745		0.0731322	0.915631		-0.0462093	0.908981		0.14946	0.537383		0.276732	0.646167		0.157391	0.479921		0.71078		28.0349	27.5682	28.019	27.5315	27.6595	27.8203	27.8445	27.7064	27.9089	27.8019	27.7771	28.2625	27.8019	27.8858	27.7958
CUL4A	Cullin-4A	Q13619;Q13619-2	26.42	26.3051	26.5645	26.5856	26.3719		-0.114879	0.777842		0.144487	0.829706		0.165579	0.778519		-0.0481262	0.911041		0.259366	0.445505		0.280458	0.670483		0.0667528	0.879533		0.661917		26.417	26.239	26.604	26.4488	26.0854	26.3811	26.433	26.6865	26.574	26.8973	26.3778	26.4815	26.2909	26.632	26.1927
CUL4B	Cullin-4B	Q13620-3;Q13620-1;Q13620	24.7561	24.11	23.4119	24.2256	24.2925		-0.646004	0.542655		-1.34412	0.820052		-0.530453	0.578718		-0.463557	0.551411		-0.698114	0.656344		0.115552	0.908358		0.182447	0.834534		0.453176		25.0275	24.5812	24.6595	23.7389	23.976	24.6153	23.6431	24.3511	22.2416	24.3307	24.2607	24.0854	24.4425	23.8481	24.5869
CUL5	Cullin-5	Q93034	26.751	26.5975	27.0071	27.0928	26.9457		-0.153503	0.610465		0.25606	0.807638		0.341738	0.624366		0.194701	0.594267		0.409563	0.168059		0.495241	0.541845		0.348204	0.380605		0.299327		26.8973	26.604	26.7518	26.6181	26.6595	26.515	27.0505	26.9202	27.0505	26.8142	27.0813	27.3828	27.0711	27.0401	26.726
CUTA	Protein CutA	O60888-3;O60888;O60888-2;C9IZG4	26.7557	26.9684	27.0382	27.0439	27.3134		0.212762	0.615994		0.282541	0.809438		0.288195	0.647721		0.557716	0.458937		0.0697791	0.874908		0.0754325	0.837254		0.344954	0.426107		0.372169		26.8973	26.8973	26.4723	26.9869	26.9316	26.9869	27.2714	27.0914	26.7518	26.9202	26.976	27.2354	27.0813	27.5609	27.2979
CXCL12	Stromal cell-derived factor 1;SDF-1-beta(3-72);SDF-1-alpha(3-67)	P48061-2;P48061-5;P48061;P48061-6;P48061-3;P48061-4	25.213	24.9526	24.7369	25.0716	24.6435		-0.260401	0.915832		-0.476093	0.863897		-0.141387	0.869049		-0.569458	0.544206		-0.215693	0.94401		0.119013	0.969854		-0.309057	0.880222		0.945942		25.3679	25.4041	24.867	25.1908	26.1757	23.4912	23.472	25.3443	25.3943	25.4105	25.1871	24.6172	24.1313	24.9089	24.8904
CXCL2	C-X-C motif chemokine 3;GRO-gamma(5-73);C-X-C motif chemokine 2;GRO-beta(5-73)	P19876;P19875	25.4532	24.0458	25.6684	24.3821	24.7623		-1.40741	0.608303		0.215197	0.851657		-1.07109	0.682347		-0.690926	0.798331		1.62261	0.487275		0.336318	0.937056		0.716485	0.840647		0.695695		25.3877	25.5075	25.4645	22.6785	23.6719	25.7871	26.1946	25.4362	25.3745	24.1253	25.8142	23.2069	25.9955	25.6348	22.6566
CXCL5	C-X-C motif chemokine 5;ENA-78(8-78);ENA-78(9-78);C-X-C motif chemokine;C-X-C motif chemokine 6;Small-inducible cytokine B6, N-processed variant 1;Small-inducible cytokine B6, N-processed variant 2;Small-inducible cytokine B6, N-processed variant 3	P42830;D6RF92;P80162	23.7003	24.77	23.5518	23.3264	22.7986		1.0697	0.615336		-0.148458	0.970554		-0.373903	0.885536		-0.901703	0.74035		-1.21815	0.302486		-1.4436	0.553649		-1.9714	0.44093		0.554032		25.0062	23.1667	22.928	24.9043	24.9134	24.4923	22.9449	23.505	24.2055	24.4544	23.1473	22.3774	21.0694	23.8711	23.4552
CYB5R1	NADH-cytochrome b5 reductase 1	Q9UHQ9;H7C0R7	23.6356	24.3529	24.3751	24.4795	24.6716		0.717354	0.76967		0.739537	0.86397		0.84393	0.75218		1.03602	0.631195		0.0221831	0.993164		0.126576	0.938617		0.318665	0.764405		0.797855		21.9531	24.4923	24.4614	23.6147	25.0401	24.4041	23.2584	25.1332	24.7338	24.604	24.0854	24.7492	24.6431	24.5285	24.8433
CYB5R3	NADH-cytochrome b5 reductase 3;NADH-cytochrome b5 reductase 3 membrane-bound form;NADH-cytochrome b5 reductase 3 soluble form	P00387-2;P00387;P00387-3;B1AHF3	28.8923	28.8988	29.1109	29.3074	29.4998		0.0065581	0.995738		0.21866	0.918724		0.415136	0.778064		0.607515	0.629947		0.212102	0.493479		0.408578	0.555446		0.600957	0.335174		0.617412		28.1164	29.7833	28.7771	28.7096	28.8829	29.104	29.0711	29.0401	29.2216	29.027	29.4053	29.49	29.2891	29.5389	29.6714
CYC1	Cytochrome c1, heme protein, mitochondrial	P08574	23.0971	22.8697	23.661	24.0125	24.2888		0	0		0.56391	0.845253		0.915407	0.658001		1.19166	0.51623		0.791304	0.316429		1.1428	0.607954		1.41905	0.191577		0.292781		21.9639	23.5104	23.817	23.2353	22.4935	22.8804	23.9043	23.3606	23.7182	23.9847	24.2096	23.8433	24.2021	24.4923	24.1719
CYCS	Cytochrome c	C9JFR7;P99999	26.6403	26.537	26.9143	27.4255	27.3056		-0.103371	0.921197		0.273916	0.845987		0.785116	0.567559		0.665263	0.458371		0.377288	0.578902		0.888487	0.524875		0.768634	0.386599		0.289509		26.3629	27.1015	26.4567	26.3545	26.2481	27.0084	26.6998	27.2535	26.7895	27.7129	27.189	27.3745	27.524	27.1214	27.2714
CYFIP1	Cytoplasmic FMR1-interacting protein 1	Q7L576;E7EQ04;Q7L576-2	31.5316	31.3632	31.7495	31.5237	31.539		-0.168365	0.503279		0.217864	0.823702		-0.00786654	0.981741		0.00736237	0.963947		0.386229	0.209207		0.160498	0.580385		0.175727	0.392935		0.238979		31.4967	31.4871	31.611	31.3568	31.3196	31.4134	31.6839	31.8973	31.6671	31.4334	31.4581	31.6798	31.4775	31.6285	31.5109
CYFIP2	Cytoplasmic FMR1-interacting protein 2	E7EVJ5;E7EVF4;Q96F07-2;E7EWA4;Q96F07;F5H583	25.6766	25.1862	25.5868	25.4453	25.6232		-0.490398	0.749627		-0.0897719	0.960649		-0.231318	0.731894		-0.0533835	0.909069		0.400627	0.816436		0.25908	0.902632		0.437015	0.763167		0.884421		25.3975	25.9781	25.654	25.6811	24.0583	25.8191	25.2535	25.2643	26.2426	25.1908	25.5869	25.558	25.7312	25.4953	25.6431
CYLD	Ubiquitin carboxyl-terminal hydrolase CYLD	F5H2R7;Q9NQC7-2;Q9NQC7;H3BS09	23.4229	23.2049	24.2701	23.4662	23.759		0	0		0.847295	0.789179		0.0433203	0.981403		0.336193	0.860389		1.06529	0.212713		0.261317	0.64876		0.55419	0.721923		0.607811		23.3772	24.2641	22.6273	23.2102	23.1759	23.2285	24.0691	24.6971	24.0443	23.7796	23.417	23.202	23.8058	24.7796	22.6917
CYTH2	Cytohesin-2	Q99418-2;Q99418;G5E9B7	27.2097	26.9247	27.1823	26.9188	27.0778		-0.284997	0.614796		-0.0273647	0.977746		-0.290893	0.643344		-0.131861	0.80945		0.257633	0.406103		-0.00589561	0.98562		0.153136	0.702905		0.560009		27.5389	27.0711	27.019	26.9869	26.9977	26.7895	26.9869	27.2535	27.3066	26.9977	26.9202	26.8385	26.8385	27.3239	27.0711
DAAM1	Disheveled-associated activator of morphogenesis 1	Q9Y4D1-2;Q9Y4D1;Q9Y4D1-3	27.655	27.6937	27.6707	27.6677	27.8987		0.0386518	0.953872		0.0156708	0.97089		0.0126915	0.98155		0.243657	0.604055		-0.022981	0.968737		-0.0259603	0.97835		0.205005	0.758676		0.796646		27.8081	27.6181	27.5389	27.2979	27.8973	27.8858	27.6663	27.6527	27.6931	27.8741	27.5536	27.5754	27.8264	28.217	27.6527
DAB2	Disabled homolog 2	P98082-3;P98082;P98082-2	27.7292	27.7607	27.7459	27.8045	27.7449		0.0314566	0.948264		0.0167141	0.984797		0.0752589	0.94361		0.0157089	0.972386		-0.0147425	0.972587		0.0438023	0.969876		-0.0157477	0.968413		0.99896		27.4785	27.9259	27.7833	27.6595	27.7195	27.9031	27.6865	27.5754	27.976	27.2625	28.0296	28.1214	27.5969	27.7064	27.9316
DAG1	Dystroglycan;Alpha-dystroglycan;Beta-dystroglycan	Q14118	26.5757	26.8134	26.1597	26.2611	26.0326		0.237655	0.713848		-0.416068	0.814552		-0.314652	0.677545		-0.543126	0.522501		-0.653723	0.128467		-0.552307	0.496633		-0.780781	0.330831		0.23758		26.2481	26.9869	26.4923	26.6998	26.976	26.7645	26.1757	26.0975	26.2058	26.2944	26.2961	26.1927	26.1391	25.6891	26.2696
DAK	Bifunctional ATP-dependent dihydroxyacetone kinase/FAD-AMP lyase (cyclizing);ATP-dependent dihydroxyacetone kinase;FAD-AMP lyase (cyclizing)	Q3LXA3;H0YCY6	28.7314	28.8766	28.8849	28.9642	28.9106		0.145242	0.545777		0.153511	0.792647		0.232878	0.597614		0.179226	0.458827		0.00826899	0.979914		0.0876363	0.767035		0.0339839	0.866157		0.47811		28.6561	28.7453	28.7927	28.7802	28.8682	28.9814	28.7195	28.9456	28.9896	28.8415	29.019	29.0322	28.805	28.9372	28.9896
DAPP1	Dual adapter for phosphotyrosine and 3-phosphotyrosine and 3-phosphoinositide	Q9UN19;Q9UN19-2	28.4144	28.5089	28.1668	28.2457	28.0863		0.0944462	0.801682		-0.247653	0.791167		-0.168732	0.734376		-0.328148	0.491918		-0.3421	0.166068		-0.263178	0.559573		-0.422594	0.0673534		0.243182		28.6798	28.189	28.3745	28.5352	28.5052	28.4862	28.0813	28.17	28.249	28.1164	28.267	28.3536	28.066	28.0813	28.1115
DARS	Aspartate--tRNA ligase, cytoplasmic	P14868;Q68CR9	30.2893	30.2915	30.4483	30.371	30.4066		0.00225639	0.996855		0.159007	0.842474		0.0816867	0.859642		0.117308	0.748913		0.156751	0.436091		0.0794303	0.771467		0.115052	0.475545		0.734085		30.0479	30.2535	30.5664	30.2077	30.4134	30.2535	30.4532	30.5296	30.362	30.3196	30.3303	30.4629	30.393	30.4032	30.4234
DARS2	Aspartate--tRNA ligase, mitochondrial	Q6PI48	23.1645	23.8614	22.2303	23.3302	23.154		0	0		0	0		0.165781	0.926379		0	0		0	0		-0.531114	0.724384		0	0		0.413174		22.4451	23.988	23.0603	23.6574	24.5228	23.4039	21.2813	22.2546	23.1548	22.7642	23.427	23.7995	23.1047	23.2262	23.1312
DAZAP1	DAZ-associated protein 1	Q96EP5-2;Q96EP5	26.2588	26.6339	26.2477	26.4105	26.5372		0.375094	0.539318		-0.0110607	0.994812		0.151705	0.714937		0.278385	0.656941		-0.386155	0.564614		-0.223389	0.585527		-0.0967096	0.875737		0.68657		26.0505	26.317	26.4089	26.5754	26.4999	26.8264	26.7518	25.8215	26.17	26.4923	26.2732	26.4661	26.8741	26.1055	26.632
DBN1	Drebrin	A8MV58;D6R9W4	30.4677	30.9348	30.3139	30.5324	30.5499		0.4671	0.5032		-0.153864	0.854734		0.0646547	0.891495		0.0821317	0.851808		-0.620964	0.207573		-0.402445	0.148085		-0.384968	0.299207		0.24415		30.4032	30.7692	30.2308	30.8901	30.9814	30.933	30.5296	30.1361	30.2759	30.5389	30.5664	30.4919	30.6881	30.5481	30.4134
DBNL	Drebrin-like protein	Q9UJU6-2;B4DDP6;B4DDD6;C9J7P1	30.9923	31.173	30.9671	31.1525	31.1131		0.180752	0.620147		-0.0251681	0.967932		0.160183	0.710675		0.120769	0.807179		-0.20592	0.24235		-0.0205688	0.933234		-0.0599829	0.885798		0.67034		30.7927	31.196	30.9882	31.2535	31.1604	31.1053	31.0217	30.9188	30.9609	31.196	31.0479	31.2135	31.341	30.8081	31.1901
DBT	Lipoamide acyltransferase component of branched-chain alpha-keto acid dehydrogenase complex, mitochondrial	Q5VVL7;P11182;F5H1F9	22.4843	24.1685	24.9954	26.1629	25.1251		1.68428	0.615496		2.51115	0.820104		3.6786	0.691803		2.64086	0.553158		0.826873	0.738624		1.99432	0.529359		0.95658	0.781095		0.390191		21.7787	24.3683	21.3058	25.391	23.6347	23.4799	26.4938	24.88	23.6125	25.9694	26.0547	26.4645	22.6653	26.6595	26.0505
DCAF7	DDB1- and CUL4-associated factor 7	E9PCY4;P61962	24.2895	24.4047	24.6428	23.3549	23.572		0.11518	0.953634		0.353221	0.864767		-0.934667	0.725948		-0.717578	0.654137		0.238041	0.818599		-1.04985	0.678972		-0.832757	0.549244		0.537744		24.7389	23.2864	24.8433	23.6105	24.7846	24.8191	24.6376	24.6096	24.6811	22.266	24.5165	23.2821	22.992	23.4418	24.2821
DCD	Dermcidin;Survival-promoting peptide;DCD-1	P81605;P81605-2	23.5807	23.9966	24.6934	24.8571	23.7863		0.41586	0.851284		1.11266	0.84577		1.27637	0.619819		0.205553	0.908903		0.696799	0.849717		0.860509	0.767836		-0.210307	0.92669		0.786864		23.1751	23.1245	24.4425	25.3975	23.4396	23.1525	23.133	24.0382	26.9089	23.9696	25.341	25.2607	22.879	24.7286	23.7512
DCP1A	mRNA-decapping enzyme 1A	Q9NPI6	24.5511	24.6831	24.8986	24.4992	24.8226		0.131957	0.911165		0.347513	0.826384		-0.0519416	0.94334		0.271529	0.653292		0.215556	0.872701		-0.183898	0.90123		0.139572	0.89747		0.846646		24.7695	24.3376	24.5463	24.6209	24.0772	25.3511	24.7492	24.5105	25.4362	24.2535	24.8142	24.4298	24.6153	25.2207	24.632
DCTD	Deoxycytidylate deaminase	P32321;P32321-2;D6RBJ9	26.8268	26.9528	26.8512	27.2464	27.115		0.12601	0.751393		0.0243746	0.971745		0.419629	0.593112		0.288177	0.563493		-0.101636	0.685688		0.293619	0.531029		0.162167	0.694189		0.323441		26.726	26.673	27.0813	27.0914	26.8019	26.965	26.7771	26.7895	26.9869	27.3153	27.1795	27.2445	27.0813	26.8973	27.3662
DCTN1	Dynactin subunit 1	E7EX90;E9PFS5;A8MWX9;E9PGE1;A8MY36;Q14203;G5E9H4;Q14203-2;Q6AWB1	30.3907	30.5	30.505	30.5661	30.5966		0.109321	0.764552		0.114322	0.851694		0.175352	0.73497		0.205929	0.566111		0.00500107	0.991078		0.0660311	0.898745		0.0966078	0.70903		0.741804		30.1724	30.4334	30.5664	30.3828	30.4629	30.6544	30.6285	30.4532	30.4334	30.3303	30.6881	30.6798	30.6544	30.4727	30.6629
DCTN2	Dynactin subunit 2	F5H2S7;Q13561;Q13561-3;Q13561-2;F5H223;F8WAG8;F8W1I6;F8VW18	30.2981	30.3515	30.4437	30.4976	30.5535		0.0533632	0.842339		0.145546	0.834784		0.199409	0.655002		0.255362	0.469665		0.0921828	0.681157		0.146046	0.584195		0.201999	0.184178		0.46697		30.1239	30.2979	30.4727	30.362	30.3515	30.341	30.5573	30.2535	30.5203	30.3828	30.4727	30.6372	30.4919	30.5664	30.6022
DCTN3	Dynactin subunit 3	O75935-3;O75935;F8W786;Q8NB28;O75935-2	27.587	27.5458	27.5974	27.5754	27.4669		-0.0412242	0.959626		0.0104357	0.994821		-0.0115496	0.989974		-0.120073	0.88134		0.0516599	0.950398		0.0296745	0.979418		-0.0788485	0.910862		0.996229		27.9539	27.189	27.6181	27.7389	27.2803	27.6181	27.189	27.611	27.9923	27.1214	27.9869	27.6181	27.3992	27.9202	27.0813
DCTN4	Dynactin subunit 4	Q9UJW0;Q9UJW0-3;Q9UJW0-2	27.8261	27.6449	27.7782	27.8815	27.9262		-0.181149	0.704447		-0.0478834	0.942391		0.0554441	0.947016		0.100123	0.807286		0.133266	0.555827		0.236593	0.76031		0.281272	0.42642		0.736806		27.5389	27.9202	28.019	27.8142	27.5165	27.604	27.7581	27.726	27.8504	27.4938	27.976	28.1747	27.9869	27.7833	28.0084
DCTN5	Dynactin subunit 5	H3BR94;H3BN51;Q9BTE1;H3BUD2;H3BS05;H3BQA4	25.9524	25.9915	26.1643	25.992	26.2477		0.0391388	0.96774		0.211943	0.864621		0.0395641	0.97152		0.295333	0.680672		0.172805	0.76558		0.000425339	1		0.256194	0.678458		0.839153		26.0359	25.4923	26.329	26.3612	25.8694	25.7441	26.4346	26.0935	25.965	25.6998	26.0317	26.2445	26.2244	26.5255	25.9933
DCTN6	Dynactin subunit 6	O00399;E5RK00	22.9979	23.1044	24.4567	24.5025	24.335		0	0		1.45878	0.477241		1.50463	0.644629		1.33707	0.426809		1.35228	0.395417		1.39814	0.579576		1.23058	0.471367		0.284548		22.7047	22.8507	23.4383	23.4588	21.9355	23.9189	24.632	24.2096	24.5285	24.918	23.8456	24.7441	24.6096	23.7578	24.6376
DCTPP1	dCTP pyrophosphatase 1	Q9H773	23.0036	23.2096	23.4089	22.6606	23.3028		0.205977	0.834192		0.405348	0.824539		-0.343007	0.774689		0.299213	0.806849		0.199371	0.804303		-0.548984	0.658436		0.0932363	0.94398		0.645199		22.6939	22.7695	23.5474	23.3376	23.5638	22.7273	23.4923	23.6743	23.0602	23.0465	22.7851	22.1501	23.7508	23.6431	22.5145
DCUN1D1	DCN1-like protein;DCN1-like protein 1	C9JVE2;Q96GG9;E7ETP2;C9J8R4;C9JRU6;C9J0B2;C9JUW4	27.4834	27.53	27.7149	27.7474	27.5293		0.0465279	0.931322		0.231511	0.828569		0.263948	0.656433		0.0458717	0.890533		0.184984	0.596333		0.217421	0.749413		-0.000656128	0.999769		0.617497		27.391	27.6931	27.3662	27.8081	27.4073	27.3745	27.8019	27.7389	27.604	27.8741	27.4707	27.8973	27.3992	27.509	27.6798
DCXR	L-xylulose reductase	Q7Z4W1	28.2054	27.8902	27.9511	27.7173	27.8809		-0.315259	0.754237		-0.25427	0.878597		-0.488162	0.726867		-0.324535	0.746486		0.0609894	0.854613		-0.172903	0.7957		-0.00927544	0.983256		0.755627		28.9567	27.6458	28.0137	27.9705	27.8858	27.8142	27.7389	28.003	28.1115	28.0608	27.4314	27.6595	27.8564	28.1065	27.6798
DDAH2	N(G),N(G)-dimethylarginine dimethylaminohydrolase 2	O95865;H0Y7N1;A3KGN5;Q5SSV3;Q5SRR8	27.5247	27.5288	27.6051	27.4423	27.6432		0.00417646	0.996034		0.0804164	0.918859		-0.0823727	0.88559		0.118519	0.823189		0.0762399	0.923348		-0.0865491	0.928549		0.114342	0.873538		0.941259		27.3066	27.8682	27.3992	27.8264	27.0084	27.7518	27.6798	27.604	27.5315	27.5826	27.2891	27.4551	27.7389	27.4073	27.7833
DDB1	DNA damage-binding protein 1	Q16531;F5GY55;B4DZP5	29.1293	29.23	29.4033	29.3475	29.406		0.100621	0.675009		0.273936	0.691076		0.218195	0.593073		0.276649	0.425867		0.173315	0.376374		0.117574	0.659157		0.176028	0.42843		0.248511		29.0296	29.2445	29.114	29.3109	29.2625	29.1164	29.3662	29.49	29.3536	29.3001	29.2913	29.4512	29.3367	29.3951	29.4862
DDI2	Protein DDI1 homolog 2	Q5TDH0;Q5TDH0-3;Q5TDH0-2	23.9988	24.509	23.5939	23.8337	23.2621		0.510195	0.8019		-0.404907	0.904645		-0.165096	0.955293		-0.736745	0.710159		-0.915102	0.269761		-0.675292	0.619076		-1.24694	0.162979		0.605333		24.6865	22.462	24.8481	24.6096	24.3712	24.5463	23.3054	24.0854	23.391	23.6865	24.5638	23.2509	23.6096	23.0122	23.1644
DDOST	Dolichyl-diphosphooligosaccharide--protein glycosyltransferase 48 kDa subunit	P39656;E7EWT1	26.0781	26.3137	26.7135	26.9072	27.1331		0.23559	0.786582		0.635427	0.790299		0.829073	0.616071		1.05495	0.432559		0.399837	0.451037		0.593483	0.523817		0.819365	0.0653603		0.26881		25.7364	26.726	25.772	26.3222	26.3745	26.2445	27.0914	26.3762	26.673	26.9428	26.5711	27.2077	27.141	27.0505	27.2077
DDT	D-dopachrome decarboxylase;D-dopachrome decarboxylase-like protein	P30046;B5MC82;B7Z522;A6NHG4	28.0722	27.8999	28.5042	28.3696	28.6232		-0.17222	0.842622		0.432081	0.789771		0.297449	0.742459		0.551009	0.563541		0.604301	0.324573		0.469669	0.584517		0.723229	0.436328		0.414008		28.1263	27.604	28.4862	27.7518	28.3023	27.6458	28.604	28.4073	28.5014	28.1842	28.6355	28.2891	28.4354	29.0889	28.3452
DDX1	ATP-dependent RNA helicase DDX1	Q92499;B4DME8;B4DPN6	27.7275	27.8695	27.8375	28.063	28.0162		0.141931	0.73673		0.109927	0.863264		0.335446	0.608881		0.288644	0.549045		-0.032004	0.921653		0.193515	0.585531		0.146713	0.649716		0.464173		27.5014	27.9814	27.6998	27.8504	27.7389	28.019	27.8858	27.9202	27.7064	27.9316	28.1115	28.1459	27.8385	28.17	28.0401
DDX19A	ATP-dependent RNA helicase DDX19A	Q9NUU7;I3L0H8;F8W9W5;I3L352;B4DRZ7	23.125	23.5287	23.0948	23.9075	21.8629		0.403693	0.882585		-0.030194	0.994567		0.782507	0.779826		-1.26207	0.551366		-0.433887	0.831824		0.378814	0.908572		-1.66577	0.436821		0.471912		24.5285	22.5168	22.3296	23.4425	24.7543	22.3892	22.4428	23.5479	23.2936	22.9915	23.7796	24.9514	21.4784	22.2114	21.8989
DDX19B	ATP-dependent RNA helicase DDX19B	Q9UMR2;H3BQK0;Q9UMR2-2;E7EMK4;H3BN59;Q9UMR2-3	26.6362	27.0074	26.6602	26.7187	26.8171		0.371272	0.451411		0.024051	0.973734		0.0825195	0.88593		0.180946	0.437403		-0.347221	0.421339		-0.288752	0.673822		-0.190325	0.460479		0.522989		26.6865	26.6181	26.604	26.8504	27.1214	27.0505	26.3645	26.8019	26.8142	26.3926	26.7129	27.0505	26.8973	26.7645	26.7895
DDX3X	ATP-dependent RNA helicase DDX3X	O00571-2;O00571;B4DLU5	28.5443	28.5979	28.3495	28.4923	28.4274		0.0535762	0.881616		-0.194815	0.841531		-0.0520236	0.920188		-0.116911	0.618883		-0.248391	0.4207		-0.1056	0.874095		-0.170487	0.594105		0.654765		28.5352	28.6663	28.4314	28.726	28.3745	28.6931	28.2625	28.4073	28.3787	28.3494	28.341	28.7864	28.3494	28.5499	28.3828
DDX6	Probable ATP-dependent RNA helicase DDX6	P26196	27.4221	27.3872	27.4999	27.4971	27.5127		-0.0348822	0.951379		0.0778065	0.912397		0.0750376	0.909019		0.0906175	0.828433		0.112689	0.578088		0.10992	0.856721		0.1255	0.557615		0.933302		27.1115	27.6458	27.509	27.524	27.3662	27.2714	27.4073	27.5609	27.5315	27.2535	27.4862	27.7518	27.4394	27.509	27.5898
DECR1	2,4-dienoyl-CoA reductase, mitochondrial	B7Z6B8;Q16698;E5RJG7;E5RFV2	27.8587	28.0641	27.7766	28.3089	28.3015		0.205333	0.72867		-0.0821171	0.835653		0.450179	0.56182		0.44272	0.431885		-0.28745	0.590137		0.244846	0.759351		0.237387	0.70854		0.293868		27.8142	27.8081	27.9539	28.019	28.4668	27.7064	27.8623	27.6595	27.8081	28.3828	28.341	28.203	28.2714	28.5165	28.1164
DEF6	Differentially expressed in FDCP 6 homolog	Q9H4E7;F5H853	23.151	23.912	22.6413	23.7401	22.4692		0.761021	0.465725		0	0		0.589176	0.576822		0	0		-1.27067	0.103668		-0.171845	0.706763		-1.4428	0.164566		0.170908		22.8382	23.374	23.2407	23.8093	23.8576	24.0691	22.7388	22.4687	22.7165	23.5551	23.9495	23.7158	22.5594	22.073	22.7751
DENND2C	DENN domain-containing protein 2C	Q68D51;C9JPG4;Q68D51-2;Q68D51-3	26.535	26.5905	26.4409	26.5149	26.1569		0.0555058	0.824362		-0.0940272	0.922308		-0.020052	0.945161		-0.37808	0.42553		-0.149533	0.794496		-0.0755577	0.828486		-0.433586	0.372668		0.456129		26.5682	26.6181	26.4186	26.4536	26.6998	26.6181	26.5522	26.7389	26.0317	26.604	26.5448	26.3959	26.0127	26.3545	26.1035
DENND3	DENN domain-containing protein 3	E9PF32;H0YAY3;A2RUS2;A2RUS2-2	28.6919	28.5098	28.7433	28.7364	28.7826		-0.182158	0.717708		0.0513929	0.907092		0.0444978	0.91583		0.0906461	0.740015		0.23355	0.532617		0.226655	0.694535		0.272804	0.504599		0.609668		28.5609	28.8829	28.632	28.4591	28.2714	28.7989	28.6831	28.7357	28.8112	28.6697	28.6251	28.9146	28.8829	28.7227	28.7421
DENND4A	C-myc promoter-binding protein	Q7Z401;E7EPL3;H3BTW5	25.5856	25.9146	25.8475	25.7835	25.6676		0.329042	0.477952		0.261923	0.703379		0.19793	0.715174		0.0820351	0.5362		-0.067119	0.817879		-0.131112	0.849336		-0.247007	0.401965		0.454339		25.5135	25.5783	25.6649	25.9869	26.0233	25.7338	25.8552	25.7312	25.9562	25.8264	25.4862	26.038	25.673	25.6595	25.6703
DENND4C	DENN domain-containing protein 4C	Q5VZ89;Q5VZ89-6;Q5VZ89-5;Q5VZ89-2;B7Z660	25.5017	23.7252	24.8647	24.7397	25.5036		-1.7765	0.545905		-0.636998	0.854728		-0.762026	0.744735		0.00189273	0.994843		1.1395	0.688632		1.01447	0.813968		1.77839	0.464764		0.608725		25.5105	25.4105	25.5841	22.4529	23.2335	25.4892	23.2533	25.8093	25.5315	23.2254	25.3342	25.6595	25.7645	25.2571	25.4892
DENR	Density-regulated protein	F8VVL1;O43583	26.4489	26.3651	26.3709	25.9126	25.8497		-0.0838248	0.921257		-0.0779915	0.95864		-0.536289	0.681925		-0.599256	0.550376		0.00583331	0.992482		-0.452464	0.668321		-0.515431	0.462245		0.522571		26.9428	26.2207	26.1833	26.1738	26.5536	26.3679	26.0752	26.5653	26.4723	25.9955	26.3712	25.3712	25.8191	25.4425	26.2874
DERA	Deoxyribose-phosphate aldolase	Q9Y315;E9PPM8;G3V158	27.4579	27.4173	27.5229	27.5846	27.6749		-0.0406049	0.953622		0.065019	0.94061		0.126692	0.82177		0.217058	0.623407		0.105624	0.798001		0.167297	0.759642		0.257662	0.462236		0.723195		27.1604	27.4551	27.7581	27.4473	27.1795	27.6251	27.3828	27.6998	27.4862	27.4394	27.5754	27.7389	27.7195	27.6527	27.6527
DGKA	Diacylglycerol kinase alpha;Diacylglycerol kinase	P23743;G3V4E1	26.235	26.1116	26.5204	26.4374	26.1455		-0.12332	0.852084		0.285419	0.818594		0.202386	0.776213		-0.0894718	0.859604		0.408739	0.361955		0.325705	0.584286		0.0338478	0.929299		0.478716		26.5898	25.8834	26.2317	26.3256	26.1565	25.8528	26.4723	26.6865	26.4024	26.4441	26.2499	26.6181	26.0567	26.1965	26.1833
DGKG	Diacylglycerol kinase gamma	P49619-3;P49619;H0YGX1;F5GX27;P49619-2	27.6279	27.8618	27.8129	27.647	27.789		0.233861	0.660351		0.184953	0.834001		0.0190449	0.981789		0.161096	0.747789		-0.0489076	0.800701		-0.214816	0.585856		-0.0727647	0.821912		0.68037		27.8973	27.6798	27.3066	27.9595	27.7518	27.8741	27.7389	27.8916	27.8081	27.5463	27.8264	27.5682	28.003	27.6251	27.7389
DGKH	Diacylglycerol kinase eta	B4DZ34;Q86XP1-3;Q86XP1-2;Q86XP1;F5GYP2	24.7641	23.7771	23.8959	24.5547	24.1499		-0.986952	0.659756		-0.868201	0.853217		-0.209335	0.87494		-0.614153	0.682218		0.118751	0.971705		0.777617	0.694364		0.372799	0.841773		0.838535		24.317	24.3239	25.6513	22.6396	23.9528	24.7389	21.8983	25.0401	24.7492	24.6096	24.6376	24.417	23.3632	24.7695	24.317
DGKZ	Diacylglycerol kinase;Diacylglycerol kinase zeta	E9PNL8;A8MVN1;B7Z6M3;Q13574-2;G3V0F6;E9PPW4;Q13574-3;Q13574	23.6486	23.6429	22.764	23.1851	23.1989		-0.00569344	0.997757		-0.884625	0.826742		-0.463501	0.777831		-0.449739	0.798764		-0.878932	0.494546		-0.457808	0.560289		-0.444045	0.719471		0.700096		24.7077	23.2961	22.942	24.0105	23.5404	23.3778	23.1479	21.7795	23.3645	23.2532	23.1496	23.1525	23.4151	22.3537	23.8278
DHRS4	Dehydrogenase/reductase SDR family member 4	Q9BTZ2;E2QRL8;Q9BTZ2-4	23.4204	24.278	24.1138	24.635	22.844		0.857636	0.729248		0.693438	0.863242		1.21459	0.661606		0	0		-0.164199	0.96692		0.356956	0.921218		-1.43401	0.497154		0.604562		22.5491	23.9925	23.7196	25.1642	25.0275	22.6424	24.0486	22.7089	25.5841	25.2207	25.3135	23.3707	22.9403	23.0841	22.5076
DHRS7	Dehydrogenase/reductase SDR family member 7	F8W9Q4;H0YJ66;Q9Y394-2;Q9Y394;H0YJE4	24.711	24.6916	24.9522	25.0661	25.6321		-0.0193907	0.996705		0.241162	0.886521		0.355116	0.774642		0.921057	0.516316		0.260553	0.872781		0.374507	0.857117		0.940447	0.525588		0.578992		23.9723	25.275	24.8858	23.6075	25.1332	25.3342	25.0608	24.6703	25.1253	25.2133	25.0401	24.945	25.3031	26.038	25.5551
DHX29	ATP-dependent RNA helicase DHX29	Q7Z478	27.6167	27.344	27.3966	27.4268	27.277		-0.272694	0.702898		-0.220128	0.845591		-0.189962	0.791375		-0.339667	0.579797		0.0525653	0.89838		0.0827319	0.877456		-0.0669734	0.81247		0.680633		28.0608	27.509	27.2803	27.141	27.5165	27.3745	27.3325	27.5682	27.2891	27.2354	27.5898	27.4551	27.2445	27.3153	27.2714
DIABLO	Diablo homolog, mitochondrial	Q9NR28-2;Q9NR28;F5H796;F5GX50;F5GYH3;F5GXT8;H7BZK7;Q9NR28-3	26.2384	26.3033	25.9379	26.0581	25.7902		0.0648848	0.943305		-0.300572	0.803052		-0.180281	0.821228		-0.448263	0.515939		-0.365457	0.579208		-0.245166	0.847293		-0.513148	0.480274		0.612686		26.3443	25.9316	26.4394	25.8457	26.3645	26.6998	25.6622	26.0359	26.1154	26.3712	25.6181	26.1852	25.9293	25.9428	25.4984
DIAPH1	Protein diaphanous homolog 1	B9ZVX0;E9PHQ0;E7ET75;E9PEZ3;H9KV28;O60610-2;E9PEZ2;O60610;E7ERW8;E7EMV0	32.0728	32.2157	32.1771	32.0478	32.0291		0.142836	0.787845		0.104216	0.890786		-0.0250034	0.960508		-0.0436948	0.929444		-0.0386194	0.952857		-0.167839	0.790066		-0.18653	0.73071		0.888888		31.9643	31.94	32.3142	31.9983	32.5156	32.1331	32.0017	32.4654	32.0641	31.9188	32.1931	32.0316	31.7849	32.2842	32.0184
DIS3L2	DIS3-like exonuclease 2	F5H051;F5H291;Q8IYB7-3;Q8IYB7-2;Q8IYB7	24.083	23.4221	23.7308	23.4406	23.0648		-0.660858	0.590287		-0.352161	0.845125		-0.642377	0.656826		-1.01816	0.448142		0.308697	0.741129		0.0184809	0.992013		0	0		0.468725		24.3101	23.5945	24.3443	23.9272	23.4233	22.9158	24.2463	23.4649	23.4812	24.019	22.8813	23.4215	23.2864	23.1806	22.7274
DLD	Dihydrolipoyl dehydrogenase, mitochondrial;Dihydrolipoyl dehydrogenase	F5H4I0;P09622;E9PEX6;B4DT69;B4DHG0	26.8385	26.6966	26.2844	26.8837	26.7972		-0.141879	0.843469		-0.554035	0.834626		0.0452836	0.960193		-0.0412165	0.916396		-0.412155	0.54688		0.187163	0.863751		0.100663	0.863461		0.481238		27.1015	26.5754	26.8385	26.2926	27.0711	26.726	26.4614	26.4785	25.9134	27.2803	26.632	26.7389	26.8504	26.7895	26.7518
DLGAP4	Disks large-associated protein 4	Q9Y2H0-3;Q9Y2H0-1;Q9Y2H0;F8WF49	25.7006	25.0803	25.7747	25.7505	25.6891		-0.620349	0.525648		0.0740089	0.939698		0.0498358	0.970786		-0.0115217	0.987367		0.694358	0.212378		0.670184	0.574102		0.608827	0.435606		0.476946		25.4105	26.0874	25.604	25.2996	24.918	25.0233	25.767	25.9672	25.5898	25.1604	25.9539	26.1371	25.2133	25.9248	25.9293
DLST	Dihydrolipoyllysine-residue succinyltransferase component of 2-oxoglutarate dehydrogenase complex, mitochondrial	P36957;B7Z5W8	24.2578	22.8723	23.9776	24.5244	24.5675		-1.3855	0.539835		-0.280256	0.927551		0.266547	0.82567		0.309696	0.805373		1.10524	0.537904		1.65204	0.546158		1.69519	0.382566		0.364398		24.7129	23.4623	24.5983	22.1644	23.8272	22.6254	22.8201	24.4862	24.6264	24.7389	24.5522	24.2821	24.2821	25.1527	24.2678
DMD	Dystrophin	P11532-4;P11532;F5GZT3;H0YFQ3;F5H6K1;P11532-3;P11532-2	28.2294	28.6418	26.2558	26.276	25.3404		0.412443	0.711214		-1.97358	0.828612		-1.95339	0.779013		-2.889	0.522768		-2.38602	0.563286		-2.36584	0.763262		-3.30144	0.435271		0.678636		27.8081	28.9372	27.9428	28.3704	28.9869	28.5682	28.3452	27.6595	22.7627	21.8461	27.9814	29.0004	27.8385	22.9148	25.2678
DMTN	Dematin	Q08495;B4DI75;E5RJ56;E5RIE7;E9PD40;E5RIG5;E5RGQ0	30.5482	30.7891	30.5597	30.5058	30.6109		0.240902	0.554399		0.0114574	0.985993		-0.0423864	0.92915		0.0627206	0.847616		-0.229445	0.396005		-0.283288	0.551633		-0.178181	0.480149		0.558767		30.5203	30.7211	30.4032	30.8608	30.7692	30.7373	30.7453	30.4134	30.5203	30.6372	30.2869	30.5934	30.7129	30.4234	30.6964
DNAJA1	DnaJ homolog subfamily A member 1	P31689	26.2025	26.3904	26.0847	26.0425	25.6691		0.187826	0.669719		-0.117843	0.844927		-0.160015	0.738687		-0.533403	0.436398		-0.305669	0.280934		-0.347841	0.538865		-0.721229	0.160215		0.196941		26.4073	25.965	26.2354	26.3187	26.558	26.2944	26.0874	26.0296	26.1371	26.2133	25.9406	25.9738	25.772	25.6891	25.5463
DNAJA2	DnaJ homolog subfamily A member 2	O60884	27.5832	27.8408	27.6254	27.5087	27.7636		0.25765	0.610834		0.0421823	0.967624		-0.0744756	0.840509		0.180407	0.620636		-0.215467	0.595114		-0.332125	0.536573		-0.0772432	0.804431		0.511629		27.8264	27.3992	27.524	27.632	27.976	27.9146	27.391	27.8741	27.611	27.5165	27.5389	27.4707	27.8916	27.7195	27.6798
DNAJB1	DnaJ homolog subfamily B member 1	B4DX52;P25685	25.6093	26.0536	26.0518	26.1199	25.9726		0.444274	0.529549		0.442469	0.793894		0.510581	0.612467		0.363251	0.460462		-0.00180562	0.998242		0.0663071	0.919902		-0.0810235	0.770721		0.496209		25.5463	25.417	25.8647	25.8647	26.1946	26.1015	26.1115	25.6237	26.4202	25.8069	26.1984	26.3545	26.0732	25.895	25.9495
DNAJB11	DnaJ homolog subfamily B member 11	Q9UBS4;H7C2Y5	25.6617	26.2145	24.8452	26.1572	25.9328		0.552811	0.695984		-0.8165	0.863823		0.495532	0.726267		0.271046	0.834016		-1.36931	0.580025		-0.057279	0.953441		-0.281764	0.767397		0.645783		25.019	26.4923	25.4738	25.6998	26.5045	26.4394	26.067	22.7875	25.6811	26.1507	26.0127	26.3084	26.0874	25.4008	26.3101
DNAJB2	DnaJ homolog subfamily B member 2	P25686;P25686-2;C9JRD2;C9JXB9	26.6315	26.4529	26.4931	26.5926	26.7129		-0.178569	0.537226		-0.138415	0.854362		-0.0389074	0.945665		0.0813986	0.620274		0.0401535	0.937615		0.139661	0.814912		0.259967	0.248721		0.687739		26.509	26.6595	26.726	26.433	26.3795	26.5463	26.4908	26.2114	26.7771	26.4551	26.4138	26.9089	26.6998	26.7129	26.726
DNAJC10	DnaJ homolog subfamily C member 10	Q8IXB1;F8W884;Q8IXB1-2	25.3315	25.3653	25.5836	25.3195	25.3653		0.0337912	0.93281		0.252025	0.825349		-0.0120436	0.978918		0.0337893	0.9395		0.218234	0.323732		-0.0458349	0.861599		-1.90735e-06	0.99999		0.544441		25.5315	25.3066	25.1565	25.3273	25.2856	25.4831	25.4923	25.6209	25.6376	25.2678	25.391	25.2996	25.0935	25.5225	25.48
DNAJC13	DnaJ homolog subfamily C member 13	O75165	26.4257	26.115	26.1204	26.1071	26.1773		-0.310666	0.546994		-0.305328	0.82529		-0.31863	0.624414		-0.248352	0.657564		0.00533803	0.963678		-0.00796382	0.979603		0.0623137	0.881302		0.54067		26.604	26.1194	26.5536	26.1642	26.0995	26.0813	26.1253	26.1585	26.0772	25.9738	26.0975	26.2499	25.9869	26.5029	26.0422
DNAJC3	DnaJ homolog subfamily C member 3	Q13217	27.9514	28.4782	28.0075	28.105	28.2348		0.526803	0.544701		0.0561536	0.968004		0.153584	0.833107		0.283359	0.630894		-0.47065	0.321219		-0.37322	0.555391		-0.243444	0.469745		0.43049		28.1115	28.2262	27.5165	28.267	28.5426	28.6251	28.2123	28.0084	27.8019	28.0608	27.9259	28.3282	28.362	28.1115	28.2308
DNAJC6	Putative tyrosine-protein phosphatase auxilin	D3DQ66;O75061;O75061-2;O75061-3	23.5072	24.2556	23.7367	23.4882	23.3231		0.748351	0.695439		0.229526	0.971145		-0.018987	0.992091		-0.18406	0.956409		-0.518826	0.850109		-0.767338	0.724908		-0.932412	0.724099		0.95054		23.065	22.6133	24.8433	24.1332	24.2891	24.3443	24.7895	24.6703	21.7503	24.7796	23.0428	22.6423	25.1371	23.244	21.5883
DNAJC7	DnaJ homolog subfamily C member 7	Q99615;Q7Z784	26.4423	26.1428	26.1756	26.0937	26.1366		-0.299506	0.837554		-0.266631	0.920099		-0.348576	0.841931		-0.305639	0.846947		0.0328744	0.96961		-0.0490704	0.964516		-0.00613276	0.994456		0.968339		27.4073	25.5433	26.3762	26.317	25.9998	26.1115	25.7619	26.1055	26.6595	26.4041	25.5463	26.3307	26.632	25.4923	26.2856
DNAJC8	DnaJ homolog subfamily C member 8	O75937	23.5373	23.4657	22.9804	23.0161	23.0226		-0.0715885	0.967963		-0.556864	0.849037		-0.521162	0.741809		-0.514687	0.570158		-0.485276	0.802755		-0.449574	0.848053		-0.443098	0.727877		0.867703		23.7594	22.8853	23.9672	23.1353	24.4234	22.8383	22.2945	24.1057	22.541	22.3297	23.017	23.7017	23.1701	22.8727	23.025
DNAJC9	DnaJ homolog subfamily C member 9	Q8WXX5	24.829	24.3843	24.9461	25.1414	24.9374		-0.444696	0.67031		0.117087	0.937407		0.312453	0.622024		0.108363	0.825367		0.561783	0.591996		0.757149	0.573713		0.55306	0.552001		0.534546		24.9225	24.5754	24.989	24.867	23.722	24.5638	24.8142	24.5165	25.5075	25.2463	25.2021	24.976	24.7995	24.7846	25.228
DNM1	Dynamin-1	Q05193-3;Q05193-4;Q05193;Q05193-5;Q05193-2;F8W9W1	28.2286	28.2578	28.129	28.1961	28.3307		0.0292301	0.958894		-0.0996049	0.888141		-0.0324427	0.971774		0.102141	0.833382		-0.128835	0.610643		-0.0616728	0.931619		0.0729109	0.843444		0.907937		27.9089	28.3494	28.4274	28.1263	28.4394	28.2077	28.1795	28.1937	28.0137	27.8564	28.2847	28.4473	28.5463	28.17	28.2759
DNM2	Dynamin-2	P50570;P50570-2	30.2866	30.1405	30.4163	30.2781	30.425		-0.146075	0.552847		0.129695	0.659908		-0.00846799	0.981088		0.138462	0.466906		0.27577	0.271504		0.137607	0.708231		0.284537	0.374613		0.293574		30.3303	30.2535	30.2759	30.0608	30.2869	30.0737	30.3724	30.4134	30.4629	30.1361	30.2647	30.4334	30.4433	30.5014	30.3303
DNM3	Dynamin-3	Q9UQ16-2;Q9UQ16-3;C9JXE5;Q9UQ16;Q9UQ16-4;E5RHK8;Q6P2G1;E5RIK2	28.5696	28.3111	28.7169	28.5154	28.4811		-0.258489	0.695428		0.147301	0.874526		-0.0541204	0.944247		-0.0884635	0.883572		0.40579	0.233645		0.204369	0.583577		0.170026	0.603542		0.574931		28.1984	28.5426	28.9677	28.3239	28.4394	28.17	28.7096	28.8264	28.6146	28.5934	28.3704	28.5826	28.5128	28.6458	28.2847
DNPEP	Aspartyl aminopeptidase	E7ETB3;Q9ULA0;H0YGP0;E7EMB6;E7EWP4	26.0628	25.9727	25.8644	25.9411	26.0035		-0.0900949	0.920955		-0.198341	0.851		-0.121719	0.847751		-0.0593243	0.93038		-0.108246	0.861207		-0.0316238	0.965659		0.0307706	0.967593		0.946516		25.6568	26.3828	26.1488	25.6918	25.8904	26.3359	25.6838	25.8528	26.0567	25.9043	25.965	25.9539	26.1488	26.1565	25.705
DOCK10	Dedicator of cytokinesis protein 10	B3FL70;Q96BY6	28.4152	28.035	28.2569	28.127	28.0463		-0.380194	0.626521		-0.158325	0.889428		-0.288263	0.715859		-0.368895	0.569958		0.22187	0.648089		0.0919317	0.875391		0.0112991	0.983633		0.629467		27.976	28.5052	28.7645	28.2979	27.9869	27.8203	28.249	28.524	27.9977	28.0243	28.2803	28.0762	28.1459	28.1015	27.8916
DOCK11	Dedicator of cytokinesis protein 11	A6NIW2;Q5JSL3	27.7484	27.4572	27.8896	27.612	27.7653		-0.291203	0.465864		0.141209	0.820929		-0.136374	0.775357		0.0168978	0.972635		0.432411	0.0614313		0.154829	0.767573		0.3081	0.504869		0.448106		27.673	27.6865	27.8858	27.4473	27.509	27.4154	27.8858	27.8973	27.8858	27.5315	27.4073	27.8973	27.4234	27.8324	28.0401
DOCK5	Dedicator of cytokinesis protein 5	Q9H7D0;H0Y7N4	27.5369	27.3686	27.6977	27.4097	27.526		-0.168304	0.54957		0.160782	0.830315		-0.127211	0.713199		-0.0109132	0.986945		0.329086	0.327808		0.0410938	0.872217		0.157391	0.769822		0.635606		27.611	27.3745	27.6251	27.3239	27.3745	27.4073	27.4785	27.7581	27.8564	27.3239	27.3662	27.5389	27.1507	27.9031	27.524
DOCK7	Dedicator of cytokinesis protein 7	Q96N67-4;Q96N67-3;Q96N67-5;Q96N67-2;Q96N67-6;Q96N67;H0Y7L2	25.8558	25.8528	26.0656	25.9501	26.0711		-0.00296847	0.998663		0.209803	0.849909		0.0943267	0.838777		0.215258	0.629591		0.212771	0.631514		0.0972951	0.788498		0.218226	0.487253		0.734104		25.5841	25.9225	26.0608	25.8069	25.767	25.9847	25.772	26.0338	26.391	26.0401	25.8019	26.0084	26.2021	25.8623	26.1488
DOCK8	Dedicator of cytokinesis protein 8	E9PH09;Q8NF50-3;Q8NF50-2;Q8NF50;F8W9H3;A2A369	28.438	28.232	28.4239	28.3966	28.4332		-0.205932	0.549913		-0.0140209	0.984412		-0.0413202	0.886387		-0.00473213	0.986411		0.191911	0.46547		0.164612	0.542958		0.2012	0.410754		0.541971		28.5014	28.2625	28.5499	28.1361	28.3109	28.249	28.3023	28.6075	28.362	28.362	28.3494	28.4785	28.3494	28.5389	28.4113
DOK1	Docking protein 1	Q99704;Q99704-3	32.81	33.026	32.9318	33.0272	32.951		0.216017	0.574932		0.121848	0.833396		0.217223	0.633405		0.140989	0.574714		-0.0941696	0.727097		0.00120544	0.999015		-0.0750287	0.758026		0.598925		32.7593	32.9763	32.6944	33.1887	32.9046	32.9848	33.0657	32.9295	32.8004	32.9224	32.9574	33.2019	32.9609	32.8737	33.0184
DOK2	Docking protein 2	O60496;E5RJ11	29.0587	29.4388	29.4484	29.6777	29.6296		0.380126	0.557776		0.389684	0.849301		0.618949	0.579791		0.570899	0.435034		0.00955772	0.987323		0.238823	0.707882		0.190772	0.578312		0.294679		29.0375	29.3367	28.8019	29.3282	29.2869	29.7014	29.3599	29.3724	29.6128	29.391	29.837	29.805	29.5628	29.6181	29.708
DOK3	Docking protein 3	D6RAM3;Q7L591;D6RC22	30.1065	30.3248	30.18	30.259	30.2316		0.218291	0.589597		0.0734927	0.87672		0.152535	0.736643		0.125132	0.740037		-0.144798	0.360625		-0.0657558	0.862754		-0.0931587	0.744126		0.677188		30.099	30.3088	29.9117	30.393	30.362	30.2193	30.2193	30.1483	30.1724	30.099	30.2647	30.4134	30.2308	30.0608	30.4032
DPP3	Dipeptidyl peptidase 3	Q9NY33;G3V1D3;G3V180;F5H8L6;F5GXD5	28.6189	28.995	28.8227	29.1105	28.9675		0.376083	0.469968		0.203828	0.821658		0.491645	0.518876		0.348582	0.503068		-0.172255	0.43497		0.115562	0.670907		-0.0275008	0.955439		0.254569		28.4938	28.6764	28.6865	28.906	28.9428	29.1361	28.8355	28.7325	28.9002	29.1263	29.0401	29.1652	29.0479	28.6798	29.1747
DPP7	Dipeptidyl peptidase 2	Q9UHL4	26.138	26.4703	26.0415	26.2578	26.5683		0.332336	0.744256		-0.0964654	0.964963		0.119854	0.919239		0.430391	0.653798		-0.428801	0.487116		-0.212482	0.705922		0.0980555	0.822284		0.634513		25.673	26.8504	25.8904	26.3877	26.7518	26.2714	26.3728	26.0894	25.6622	26.4202	26.2678	26.0854	26.6595	26.3861	26.6595
DPP9	Dipeptidyl peptidase 9	Q86TI2;Q86TI2-2;Q86TI2-4;Q86TI2-3;H7BYF3;Q86TI2-5	26.3826	26.3674	26.2785	26.0356	25.8919		-0.0151183	0.968801		-0.104101	0.9067		-0.346922	0.594477		-0.490618	0.439645		-0.0889829	0.887825		-0.331804	0.543832		-0.4755	0.377267		0.327602		26.4008	26.2244	26.5225	26.3325	26.5419	26.228	25.9406	26.6181	26.2767	26.1642	25.945	25.9977	25.8409	26.1194	25.7156
DPYD	Dihydropyrimidine dehydrogenase [NADP(+)]	Q12882	27.1034	27.1155	27.279	26.9399	26.8334		0.0120405	0.989636		0.175529	0.863913		-0.163589	0.797478		-0.27	0.654348		0.163488	0.707238		-0.17563	0.762258		-0.28204	0.526373		0.538131		27.5389	26.8741	26.8973	27.217	27.3153	26.8142	27.1015	27.4551	27.2803	26.9202	27.0608	26.8385	26.965	26.8623	26.673
DPYSL2	Dihydropyrimidinase-related protein 2	Q16555;B4DR31	30.9032	30.8373	30.9758	31.1102	31.1055		-0.065932	0.879917		0.072635	0.929203		0.206955	0.700581		0.20226	0.618456		0.138567	0.598779		0.272887	0.50174		0.268192	0.324882		0.505217		30.8829	30.6544	31.1724	30.9046	30.8459	30.7613	31.13	31.0283	30.7692	31.0283	31.1239	31.1783	31.2077	31.0414	31.0673
DRG2	Developmentally-regulated GTP-binding protein 2	P55039;A8MZF9	24.6065	24.8891	25.3542	24.8143	25.2274		0.28263	0.706896		0.747726	0.756187		0.20779	0.775986		0.620904	0.457871		0.465097	0.390961		-0.0748393	0.918589		0.338275	0.488085		0.293894		24.4862	24.3101	25.0233	24.6209	25.1795	24.867	25.0935	25.48	25.4892	24.7945	24.6209	25.0275	25.0105	25.3307	25.341
DSCR3	Down syndrome critical region protein 3	A8MTY9;O14972;B7Z6B1;H7C5I8;A8MY26;B7Z606;E7EWN9	24.4581	24.8307	23.845	24.4416	24.3481		0.3726	0.660928		-0.613128	0.84399		-0.016517	0.980469		-0.109997	0.809961		-0.985728	0.535293		-0.389117	0.723581		-0.482597	0.561255		0.619636		24.417	24.5404	24.417	24.4614	25.3877	24.6431	22.7012	24.0443	24.7895	24.6595	24.1015	24.5638	24.5225	24.5285	23.9933
DST	Dystonin	F8W9J4;Q03001;E7ERU0;E7ERU2;E9PEB9;E9PHM6;Q03001-8	25.1731	22.6061	25.7491	24.1796	24.9886		-2.56693	0.507575		0.576048	0.850627		-0.993443	0.741253		-0.184444	0.925592		3.14298	0.208607		1.57349	0.644108		2.38249	0.380875		0.280615		23.9404	25.8093	25.7695	22.5325	21.5335	23.7523	26.1965	25.4105	25.6403	22.8637	24.1526	25.5225	24.1401	25.6125	25.2133
DSTN	Destrin	P60981;P60981-2;F6RFD5	30.787	30.3755	30.548	30.5988	30.7185		-0.411428	0.512025		-0.238978	0.822266		-0.188126	0.600185		-0.0684764	0.757944		0.17245	0.556148		0.223302	0.579198		0.342952	0.388457		0.250181		30.8756	30.6544	30.8309	30.1724	30.5109	30.4433	30.6372	30.5934	30.4134	30.5481	30.6285	30.6198	30.6372	30.8385	30.6798
DTNBP1	Dysbindin	A6NFV8;Q96EV8;F5GY46;Q96EV8-2;D6RCT8	23.5091	24.1819	24.0566	24.1981	23.2561		0.672814	0.713065		0.547539	0.848531		0.689047	0.72682		-0.25301	0.890868		-0.125275	0.897601		0.0162328	0.990103		-0.925824	0.481056		0.592791		24.1332	24.0608	22.3331	23.8138	23.9878	24.7441	24.2607	24.1946	23.7145	23.8288	24.368	24.3975	23.0346	24.1015	22.6321
DTX3L	E3 ubiquitin-protein ligase DTX3L	Q8TDB6	24.4124	24.6683	24.4959	24.4756	24.5726		0.25583	0.604983		0.0834662	0.884173		0.0631911	0.883289		0.160194	0.701162		-0.172364	0.700069		-0.192639	0.784585		-0.0956364	0.860451		0.807618		24.3712	24.3376	24.5285	24.5983	24.945	24.4614	24.2463	24.6431	24.5983	24.3101	24.7389	24.3778	24.2607	24.7338	24.7234
DTYMK	Thymidylate kinase	P23919;H7C312	28.0156	27.5147	27.7384	27.5662	27.7883		-0.500824	0.564804		-0.277191	0.803877		-0.449408	0.612771		-0.227294	0.662892		0.223633	0.607631		0.0514158	0.940454		0.27353	0.579642		0.423747		28.3367	27.6595	28.0505	27.8445	27.5014	27.1984	27.6931	27.7325	27.7895	27.673	27.524	27.5014	27.7581	27.9202	27.6865
DUSP22	Dual specificity protein phosphatase 22	Q9NRW4;Q9NRW4-2	26.2845	25.7837	26.2647	26.003	26.067		-0.500835	0.664209		-0.0198663	0.992675		-0.281488	0.821473		-0.217575	0.828389		0.480968	0.352493		0.219347	0.790179		0.28326	0.470706		0.689418		25.867	25.9361	27.0505	25.7895	25.5725	25.989	26.1253	26.5433	26.1253	25.6181	26.1927	26.1984	25.989	26.2535	25.9584
DUSP23	Dual specificity protein phosphatase 23	Q9BVJ7	26.5658	26.5148	26.4204	26.4815	26.4719		-0.0510515	0.945037		-0.14538	0.937509		-0.084341	0.945018		-0.0938835	0.891146		-0.0943286	0.927803		-0.0332896	0.97846		-0.0428321	0.940447		0.997155		26.9869	26.3629	26.3477	26.3101	26.6865	26.5478	25.767	26.632	26.8623	25.8904	26.7645	26.7895	26.1253	26.6865	26.604
DUSP3	Dual specificity protein phosphatase 3	P51452;Q8IYJ9	30.6888	30.6197	30.9222	31.0278	31.1336		-0.0691853	0.835526		0.233393	0.815541		0.338996	0.579387		0.444729	0.403378		0.302579	0.389779		0.408181	0.542997		0.513915	0.328558		0.204897		30.7129	30.5844	30.7692	30.4334	30.8234	30.6022	31.0349	30.947	30.7849	30.9539	31.225	30.9046	31.0414	31.2478	31.1115
DYM	Dymeclin	Q7RTS9;Q7RTS9-2	24.1281	23.3473	24.327	23.6861	24.0768		-0.780809	0.548823		0.198943	0.883757		-0.442012	0.713421		-0.0512238	0.94461		0.979752	0.338106		0.338797	0.808304		0.729586	0.441727		0.371512		24.4551	23.5983	24.3307	23.018	23.0832	23.9406	24.0691	24.7024	24.2096	23.9584	23.1773	23.9225	23.8288	24.2607	24.141
DYNC1H1	Cytoplasmic dynein 1 heavy chain 1	Q14204	29.9953	29.9524	30.0595	29.9849	30.0074		-0.0429141	0.982324		0.0642052	0.983645		-0.0103855	0.993375		0.0121129	0.992385		0.107119	0.8884		0.0325286	0.978672		0.055027	0.946353		0.999934		29.6407	29.1435	31.2019	29.6865	29.788	30.3828	29.7802	30.1115	30.2869	29.6441	29.8973	30.4134	29.7064	29.9539	30.362
DYNC1I2	Cytoplasmic dynein 1 intermediate chain 2	F8W8S0;Q13409-6;Q13409-3;B7ZA04;Q13409-2;Q13409-5;Q13409;E7EQL5;E7ET01;E7ETL8;E7EQU2;E7ESD3;E7EMU4;E7EV09	24.7149	24.1871	24.3987	24.8657	24.7752		-0.527767	0.825356		-0.316217	0.896148		0.150846	0.943743		0.0603733	0.970617		0.21155	0.920825		0.678613	0.794122		0.58814	0.756672		0.878631		24.5285	23.7995	25.8166	24.3307	22.9415	25.2891	24.4488	24.1488	24.5983	24.4425	25.1527	25.002	24.6209	24.3844	25.3205
DYNC1LI1	Cytoplasmic dynein 1 light intermediate chain 1	Q9Y6G9;E9PHI6	26.7237	26.8175	27.0067	26.8748	26.8142		0.0937309	0.922091		0.282984	0.827777		0.151051	0.849806		0.0904617	0.862899		0.189253	0.72732		0.0573196	0.952418		-0.0032692	0.994516		0.877721		26.4122	26.6181	27.141	26.604	26.604	27.2445	26.8504	27.1507	27.019	26.604	27.17	26.8504	26.8142	26.8142	26.8142
DYNC2H1	Cytoplasmic dynein 2 heavy chain 1	Q8NCM8;Q8NCM8-2;Q49AI6	25.718	24.9021	24.8116	23.7604	25.4013		-0.81584	0.787988		-0.90638	0.843714		-1.95757	0.683679		-0.316702	0.837906		-0.0905393	0.987332		-1.14173	0.859515		0.499139	0.875764		0.799066		25.5492	25.705	25.8997	23.638	23.9274	27.141	25.6838	22.9466	25.8044	24.2289	21.1095	25.9428	25.8858	26.1332	24.1848
DYNLL1	Dynein light chain 1, cytoplasmic	P63167	30.1588	30.2157	30.0611	30.1064	30.132		0.0569032	0.925867		-0.0977058	0.909924		-0.0524839	0.953049		-0.0268485	0.961019		-0.154609	0.682307		-0.109387	0.893672		-0.0837517	0.826555		0.972729		29.8872	30.4532	30.1361	30.0084	30.341	30.2979	29.8309	30.099	30.2535	29.8188	30.0084	30.4919	29.9117	30.2308	30.2535
DYNLL2	Dynein light chain 2, cytoplasmic	Q96FJ2	25.864	26.0297	25.7912	26.3024	26.0295		0.165676	0.825048		-0.0728779	0.961793		0.438378	0.655224		0.165494	0.837795		-0.238554	0.301895		0.272702	0.549516		-0.000181834	1		0.529872		25.3844	26.3477	25.8599	26.0874	26.0084	25.9933	25.8504	25.8717	25.6513	26.3273	26.1661	26.4138	26.0813	25.7024	26.3049
DYNLRB1	Dynein light chain roadblock-type 1;Dynein light chain roadblock-type 2	B4DFR2;Q9NP97;B1AKR6;Q8TF09	26.0452	22.9531	25.3673	23.865	24.6244		-3.09215	0.497844		-0.677911	0.845127		-2.18019	0.620158		-1.4208	0.59523		2.41423	0.399721		0.911956	0.860416		1.67135	0.61736		0.464102		25.9338	25.6292	26.5725	24.6703	22.4861	21.7027	26.0588	26.019	24.024	22.2156	25.9361	23.4434	25.6944	25.5315	22.6473
DYRK1A	Dual specificity tyrosine-phosphorylation-regulated kinase 1A	F8W9I9;Q13627-3;Q13627-4;Q13627-5;Q13627-2;Q13627;F8WAP0	24.5486	25.4025	24.9341	25.3361	24.7553		0.853944	0.617266		0.385499	0.895505		0.787533	0.781171		0.206737	0.903924		-0.468445	0.693071		-0.0664107	0.984614		-0.647207	0.53764		0.849238		23.5307	24.7945	25.3205	25.5754	25.228	25.4041	25.5105	25.3511	23.9406	24.7645	26.976	24.2678	24.0526	25.4488	24.7645
ECE1	Endothelin-converting enzyme 1	B4DKB2;P42892-3;P42892-2;P42892-4;P42892	26.1779	26.9085	26.4648	26.6132	26.6818		0.730593	0.610716		0.286971	0.901275		0.435353	0.776226		0.50391	0.668375		-0.443621	0.54298		-0.29524	0.685643		-0.226683	0.39462		0.664063		25.6376	27.1115	25.7846	26.7518	26.9977	26.976	26.329	26.0254	27.0401	26.3844	26.4362	27.019	26.6998	26.6458	26.6998
ECH1	Delta(3,5)-Delta(2,4)-dienoyl-CoA isomerase, mitochondrial	Q13011	27.5484	27.695	27.6061	27.7788	27.9862		0.146595	0.762716		0.0577056	0.972168		0.230439	0.7896		0.437817	0.505481		-0.0888894	0.923901		0.0838439	0.921291		0.291222	0.411242		0.737498		27.2714	27.8799	27.4938	27.5754	27.7771	27.7325	28.0813	27.0505	27.6865	28.2445	27.4394	27.6527	27.8741	28.17	27.9146
ECHDC1	Ethylmalonyl-CoA decarboxylase	Q9NTX5-3;Q9NTX5-6;Q9NTX5-2;Q9NTX5	24.2452	26.0193	25.5333	25.7522	26.9827		1.77411	0.714079		1.28807	0.863341		1.50694	0.778298		2.73746	0.522223		-0.486036	0.921373		-0.267171	0.96048		0.963351	0.70673		0.71037		26.8019	24.0044	21.9293	27.1507	24.0215	26.8858	27.1015	26.4645	23.0339	26.5898	26.976	23.6907	26.8264	27.0505	27.0711
ECHS1	Enoyl-CoA hydratase, mitochondrial	P30084	26.9261	27.337	27.1654	27.8184	27.7857		0.410847	0.666938		0.239267	0.853227		0.89226	0.582486		0.859579	0.445921		-0.171581	0.679584		0.481412	0.536825		0.448732	0.426122		0.233072		26.3545	27.3325	27.0914	27.0711	27.6595	27.2803	27.2354	27.1795	27.0813	27.9539	27.6931	27.8081	27.8858	27.7453	27.726
ECI2	Enoyl-CoA delta isomerase 2, mitochondrial	O75521-2;O75521;F8WAW4;F8W6J1;F1LLU7;C9JB63	22.9611	23.7264	23.021	23.002	23.1196		0.765303	0.659724		0.0599041	0.970134		0.0409145	0.966829		0.158563	0.743949		0	0		-0.724389	0.735412		0	0		0.681915		22.9225	23.1146	22.8461	24.8546	23.4236	22.9008	23.5873	22.6115	22.8641	23.4425	22.5883	22.9751	23.3577	23.2361	22.7651
ECM1	Extracellular matrix protein 1	Q16610;Q16610-4;Q16610-2	26.5682	26.6787	26.7117	26.473	26.7974		0.110521	0.932445		0.143515	0.939153		-0.0951722	0.943701		0.229179	0.819086		0.0329946	0.955286		-0.205693	0.750613		0.118659	0.770234		0.88449		26.038	27.3325	26.3342	26.3629	26.9089	26.7645	26.533	26.7518	26.8504	26.3307	26.6458	26.4425	26.8019	26.7518	26.8385
ECM29	Proteasome-associated protein ECM29 homolog	Q5VYK3;B3KXF2	27.6381	27.1957	27.6907	27.4272	27.4059		-0.44243	0.544967		0.0526066	0.920119		-0.210907	0.60064		-0.232205	0.437701		0.495037	0.375938		0.231524	0.687446		0.210225	0.645776		0.293463		27.6931	27.6458	27.5754	26.9977	27.0505	27.5389	27.5536	27.9146	27.604	27.3325	27.4707	27.4785	27.3745	27.4938	27.3494
EDC4	Enhancer of mRNA-decapping protein 4	Q6P2E9;Q6P2E9-2	25.2484	25.6858	25.5823	25.6333	25.482		0.437408	0.442204		0.333965	0.849528		0.384948	0.65035		0.233612	0.565941		-0.103444	0.792132		-0.0524604	0.949596		-0.203796	0.599963		0.549109		25.3545	25.2535	25.1371	25.6513	25.5869	25.8191	25.5522	25.8336	25.3612	25.2607	25.6096	26.0296	25.433	25.2714	25.7415
EEA1	Early endosome antigen 1	Q15075	27.8276	27.8948	27.8921	27.9504	27.9361		0.0671558	0.868502		0.0644385	0.887059		0.122748	0.711686		0.108477	0.650661		-0.00271734	0.99607		0.0555922	0.909793		0.0413208	0.900456		0.898031		27.9202	27.9031	27.6595	27.6527	27.976	28.0557	27.9705	27.9539	27.7518	27.8623	28.0349	27.9539	27.8564	27.9705	27.9814
EEF1A1	Putative elongation factor 1-alpha-like 3;Elongation factor 1-alpha 1	Q5VTE0;P68104;Q6IQ15;F8W6I0	30.8674	31.0163	30.7549	30.4822	30.3496		0.148938	0.728469		-0.112469	0.863864		-0.385213	0.568615		-0.517739	0.465249		-0.261407	0.384849		-0.53415	0.47526		-0.666677	0.312663		0.213518		30.7047	30.7613	31.1361	30.9746	31.1842	30.8901	30.8829	30.7533	30.6285	30.4629	30.5109	30.4727	30.5754	30.1115	30.362
EEF1B2	Elongation factor 1-beta	P24534	29.653	29.8693	29.8158	29.9354	29.9143		0.216368	0.588381		0.162802	0.825832		0.28242	0.698301		0.261352	0.551062		-0.053566	0.869142		0.0660521	0.92017		0.0449842	0.880947		0.692178		29.4571	29.8474	29.6544	29.9814	29.8339	29.7927	30.0084	29.7227	29.7162	29.6441	29.8973	30.2647	29.8234	29.7958	30.1239
EEF1D	Elongation factor 1-delta	E9PK01;P29692;E9PRY8;P29692-2;E9PPR1;E9PL12;E9PQ49;E9PI39;E9PMW7;E9PBQ9;E9PIZ1;H0YCK7	29.04	29.2347	29.0013	28.6524	28.6391		0.194732	0.673748		-0.0386442	0.944098		-0.387571	0.577825		-0.400869	0.429396		-0.233376	0.449022		-0.582303	0.471178		-0.595601	0.277249		0.191101		29.2054	28.8081	29.1065	29.114	29.4688	29.1214	29.0531	29.0137	28.9372	28.5352	28.7389	28.6831	28.5646	28.6697	28.6831
EEF1E1	Eukaryotic translation elongation factor 1 epsilon-1	O43324;D6RBD7;C9J1V9;C9JLK5;H0YAL7	25.9733	26.3756	26.5361	26.3031	26.3564		0.402308	0.546965		0.562858	0.683836		0.329814	0.61553		0.383174	0.499815		0.16055	0.683751		-0.0724932	0.908324		-0.0191332	0.974474		0.342132		25.7492	26.0296	26.141	26.3778	26.604	26.1449	26.4785	26.7389	26.391	26.1546	26.2426	26.512	26.1273	26.3943	26.5478
EEF1G	Elongation factor 1-gamma	P26641;B4DTG2;B4DUP0	30.8438	30.8039	30.8894	30.9041	31.0032		-0.0398966	0.904886		0.0456015	0.863809		0.0602531	0.800447		0.159352	0.47212		0.0854982	0.725687		0.10015	0.813053		0.199249	0.465998		0.558562		30.7849	30.7927	30.9539	30.6544	30.7692	30.9882	30.8309	30.94	30.8973	30.8157	30.8682	31.0283	31.0608	30.947	31.0017
EEF2	Elongation factor 2	P13639;B4DPU3;F5H370	28.7152	28.6815	28.8252	28.6262	28.5725		-0.0337442	0.970516		0.109955	0.940244		-0.0890611	0.934256		-0.142778	0.854475		0.143699	0.487255		-0.0553169	0.873542		-0.109034	0.579547		0.879989		28.524	29.3282	28.2935	28.6355	28.5826	28.8264	28.8355	28.8916	28.7486	28.5682	28.5682	28.7421	28.5646	28.6251	28.5278
EFEMP1	EGF-containing fibulin-like extracellular matrix protein 1	Q12805-2;Q12805-4;Q12805-3;Q12805;B4DW75;E9PGL6	26.6918	26.8303	26.8223	26.5995	26.654		0.138505	0.776034		0.130524	0.854371		-0.0923068	0.878213		-0.0377744	0.930183		-0.00798098	0.97187		-0.230811	0.637572		-0.176279	0.468367		0.653418		26.9089	26.8019	26.3645	26.8504	26.6865	26.9539	26.8142	26.8385	26.8142	26.4692	26.4908	26.8385	26.604	26.726	26.632
EFHD2	EF-hand domain-containing protein D2	Q96C19;C9JTI6;H0Y4Y4	24.7383	24.9653	24.9662	25.0446	25.0639		0.226978	0.488175		0.227916	0.826745		0.306338	0.588587		0.325567	0.551947		0.00093778	0.998656		0.0793597	0.832365		0.0985889	0.825359		0.655315		24.8433	24.6431	24.7286	24.9316	24.9495	25.0148	25.1095	24.5983	25.1908	25.1527	24.8481	25.1332	25.0443	24.7695	25.3778
EFNB1	Ephrin-B1	P98172	26.1764	26.4645	26.2693	25.9628	25.9151		0.288192	0.53351		0.0928955	0.841322		-0.213601	0.613767		-0.261292	0.530612		-0.195297	0.533084		-0.501793	0.553715		-0.549484	0.392318		0.246017		26.1719	26.2517	26.1055	26.673	26.3494	26.3712	26.1095	26.3778	26.3205	25.767	26.0854	26.0359	25.8973	26.1507	25.6971
EFTUD1	Elongation factor Tu GTP-binding domain-containing protein 1	Q7Z2Z2;Q7Z2Z2-2	25.4826	25.4422	25.7993	25.5805	25.5123		-0.0403201	0.956457		0.316729	0.809685		0.097936	0.84354		0.0297171	0.936635		0.357049	0.531549		0.138256	0.873917		0.0700372	0.899498		0.65399		25.6568	25.5374	25.2535	25.0484	25.5812	25.6971	25.5433	25.8504	26.0041	25.6209	25.3511	25.7695	25.4362	25.433	25.6676
EGF	Pro-epidermal growth factor;Epidermal growth factor	E7EVD2;P01133;P01133-2	25.9207	25.9228	25.7259	25.4307	25.6923		0.00205358	0.997169		-0.194887	0.845122		-0.490009	0.588903		-0.228491	0.672687		-0.19694	0.761297		-0.492063	0.551531		-0.230545	0.731356		0.514869		25.7746	25.8044	26.1833	25.5433	26.0062	26.2188	25.8019	25.4041	25.9716	25.4831	25.4614	25.3477	25.4362	26.0169	25.6237
EHBP1	EH domain-binding protein 1	Q8NDI1-3;Q8NDI1-2;Q8NDI1	23.7358	24.0392	23.6135	24.1497	23.2349		0.303317	0.552655		-0.122295	0.860322		0.413829	0.755002		-0.500914	0.653176		-0.425611	0.414532		0.110512	0.853609		-0.804231	0.48127		0.370123		23.7594	23.6096	23.8385	24.0359	23.7995	24.2821	23.8858	23.391	23.5638	24.1253	24.0275	24.2961	23.895	23.3807	22.429
EHBP1L1	EH domain-binding protein 1-like protein 1	Q8N3D4;E9PIH6	25.9916	26.1174	25.2624	25.8488	25.4578		0.125848	0.717077		-0.729193	0.68259		-0.142775	0.644594		-0.533782	0.455285		-0.855042	0.224053		-0.268623	0.546532		-0.65963	0.372624		0.194651		25.9869	26.1115	25.8764	26.0752	25.9584	26.3187	25.5812	25.217	24.989	25.7543	25.9157	25.8764	25.8093	25.2891	25.275
EHD1	EH domain-containing protein 1	Q9H4M9;F5H5B6;B4DZH9;C9JC03;C9J2Z4	31.4017	31.3389	31.3403	31.5858	31.6163		-0.0628338	0.912557		-0.0614281	0.961501		0.184034	0.737551		0.214577	0.67018		0.00140572	0.997845		0.246868	0.568558		0.277411	0.469383		0.648646		31.099	31.6629	31.4433	31.362	31.1724	31.4823	31.6839	31.2193	31.1177	31.5799	31.4727	31.7047	31.6198	31.4134	31.8157
EHD3	EH domain-containing protein 3	Q9NZN3	33.1675	33.2889	33.1988	33.3115	33.3203		0.121371	0.816784		0.031297	0.974097		0.14402	0.795543		0.152809	0.751525		-0.0900739	0.599641		0.0226491	0.899782		0.0314382	0.812636		0.834638		32.7965	33.4581	33.2478	33.3568	33.2619	33.2478	33.3303	33.1468	33.1192	33.2759	33.2759	33.3828	33.3956	33.2619	33.3033
EHD4	EH domain-containing protein 4	Q9H223	28.1175	27.9605	28.1739	28.2121	28.1666		-0.157029	0.547296		0.0564035	0.895278		0.0946236	0.735567		0.0490735	0.739548		0.213433	0.396246		0.251653	0.548522		0.206103	0.248943		0.378965		28.2308	28.0557	28.066	28.0084	27.9814	27.8916	28.3109	28.2077	28.003	28.0762	28.2535	28.3066	28.1361	28.1652	28.1984
EHHADH	Peroxisomal bifunctional enzyme;Enoyl-CoA hydratase/3,2-trans-enoyl-CoA isomerase;3-hydroxyacyl-CoA dehydrogenase	Q08426;Q08426-2;F5GWL9	25.3694	24.2938	25.1121	24.6953	23.9095		-1.07556	0.617644		-0.257317	0.812579		-0.674121	0.658691		-1.45991	0.551877		0.818248	0.609308		0.401443	0.889392		-0.384345	0.888341		0.605568		25.3811	25.3101	25.417	25.0526	22.9385	24.8904	25.3645	25.0813	24.8904	25.2785	24.9584	23.8489	22.2532	24.632	24.8433
EIF1	Eukaryotic translation initiation factor 1	P41567	24.6125	25.0048	24.8308	24.213	24.7061		0.392275	0.816251		0.218299	0.928944		-0.399528	0.904858		0.0935631	0.944812		-0.173976	0.881743		-0.791803	0.837824		-0.298712	0.762165		0.919617		23.9584	25.6622	24.217	24.6209	24.6649	25.7286	25.0148	24.48	24.9977	22.5755	24.1095	25.9539	24.7695	24.4676	24.8811
EIF1AX	Eukaryotic translation initiation factor 1A, X-chromosomal	P47813	24.1524	25.1725	23.3874	24.5745	24.2762		1.02013	0.546933		-0.765017	0.864526		0.422141	0.781059		0.123803	0.929862		-1.78514	0.443535		-0.597984	0.548362		-0.896322	0.319597		0.503081		24.5983	23.1251	24.7338	25.0062	25.3205	25.1908	21.5947	24.4984	24.0691	24.5983	24.3307	24.7945	24.3101	23.9316	24.5869
EIF2A	Eukaryotic translation initiation factor 2A;Eukaryotic translation initiation factor 2A, N-terminally processed	Q9BY44;B4DQ14;F8WAE5;B4DF96;Q9BY44-2	26.742	27.3761	27.0623	27.2567	27.3122		0.634066	0.525226		0.320299	0.825465		0.514643	0.615775		0.570218	0.477959		-0.313766	0.386266		-0.119422	0.644901		-0.0638472	0.750994		0.302813		26.8385	27.0914	26.2961	27.4551	27.3153	27.3578	27.3239	26.9202	26.9428	27.1795	27.2077	27.3828	27.3662	27.1795	27.391
EIF2AK2	Interferon-induced, double-stranded RNA-activated protein kinase	E9PC80;P19525	25.434	25.3698	25.4793	25.3897	25.3971		-0.0641225	0.8116		0.0453529	0.884647		-0.0442429	0.934368		-0.0368436	0.602017		0.109475	0.714004		0.0198797	0.979025		0.0272789	0.915191		0.950707		25.417	25.4583	25.4266	25.4707	25.1681	25.4707	25.5609	25.3307	25.5463	25.141	25.3443	25.6838	25.4041	25.4362	25.3511
EIF2B1	Translation initiation factor eIF-2B subunit alpha	Q14232;B4DGX0;F5H0D0	27.783	27.5582	27.7913	27.6313	27.4652		-0.224803	0.669451		0.00822894	0.992253		-0.151744	0.716083		-0.317833	0.470835		0.233032	0.628243		0.0730597	0.902303		-0.0930297	0.823431		0.539944		28.003	27.6663	27.6798	27.611	27.2803	27.7833	27.5389	28.0453	27.7895	27.7518	27.6181	27.524	27.3494	27.5754	27.4707
EIF2B2	Translation initiation factor eIF-2B subunit beta	P49770	24.9832	25.2075	24.3759	24.9401	24.7216		0.224306	0.626734		-0.607278	0.826591		-0.0430215	0.652718		-0.261559	0.573562		-0.831584	0.517031		-0.267328	0.630165		-0.485865	0.467654		0.558273		24.9977	24.989	24.9628	25.5255	25.0484	25.0484	23.3376	24.8904	24.8997	24.945	24.9803	24.895	24.8044	24.976	24.3844
EIF2B3	Translation initiation factor eIF-2B subunit gamma	Q9NR50-3;Q9NR50-2;Q9NR50;H0Y580	26.5496	26.7171	26.6265	26.3688	26.4125		0.167542	0.719549		0.0769774	0.889661		-0.180801	0.708471		-0.137105	0.746022		-0.0905641	0.798007		-0.348342	0.55267		-0.304646	0.486734		0.482108		26.5696	26.3273	26.7518	26.7771	26.8973	26.4769	26.5754	26.5653	26.7389	26.4138	26.228	26.4645	26.4969	26.5667	26.1738
EIF2B4	Translation initiation factor eIF-2B subunit delta	F5H6W1;E7ERK9;Q9UI10-3;Q9UI10;Q9UI10-2;F8W8L6	23.9498	23.9085	23.8508	23.7059	23.4987		-0.0412153	0.968391		-0.0989768	0.958179		-0.243866	0.894165		-0.451083	0.566211		-0.0577615	0.968985		-0.202651	0.936098		-0.409868	0.72181		0.944877		23.8093	24.1174	23.9225	24.1871	23.2078	24.3307	23.4199	23.5869	24.5455	22.5105	24.0608	24.5463	23.4104	23.0751	24.0105
EIF2B5	Translation initiation factor eIF-2B subunit epsilon	E9PC74;Q13144	25.286	23.1688	25.3306	25.1002	24.1988		-2.11714	0.447714		0.0445811	0.970075		-0.185815	0.815514		-1.08715	0.523973		2.16172	0.207038		1.93132	0.502964		1.02999	0.546071		0.197303		25.391	24.8433	25.6237	23.8275	23.3599	22.3191	25.1871	25.5225	25.2821	24.9316	25.4105	24.9584	25.1332	24.0511	23.4122
EIF2S1	Eukaryotic translation initiation factor 2 subunit 1	P05198	28.6461	28.7395	28.744	28.6353	28.7028		0.0934022	0.72065		0.0978616	0.824114		-0.0108655	0.976522		0.0566483	0.740896		0.00445938	0.991065		-0.104268	0.794543		-0.036754	0.876388		0.791286		28.6458	28.5536	28.7389	28.6075	28.8916	28.7195	28.6458	28.7357	28.8504	28.5128	28.7645	28.6285	28.7802	28.7031	28.6251
EIF2S2	Eukaryotic translation initiation factor 2 subunit 2	P20042	27.6993	28.0218	27.4179	27.4726	27.2195		0.322437	0.668292		-0.281391	0.824991		-0.226672	0.764506		-0.479855	0.550113		-0.603828	0.348561		-0.549109	0.547755		-0.802291	0.378541		0.32262		27.976	27.3325	27.7895	28.3452	28.0137	27.7064	27.217	27.6458	27.391	27.7645	27.391	27.2625	27.341	26.8623	27.4551
EIF2S3	Eukaryotic translation initiation factor 2 subunit 3;Putative eukaryotic translation initiation factor 2 subunit 3-like protein	P41091;Q2VIR3;F8W810;Q2VIR3-2	29.4467	29.6184	29.6299	29.7387	29.6142		0.171727	0.480187		0.183221	0.667732		0.291976	0.61527		0.167488	0.457604		0.0114937	0.888498		0.120248	0.827253		-0.0042394	0.978673		0.470934		29.3704	29.5146	29.4551	29.6424	29.6285	29.5844	29.6458	29.6578	29.5862	29.4512	29.8249	29.94	29.5407	29.6004	29.7014
EIF3A	Eukaryotic translation initiation factor 3 subunit A	F5H335;Q14152	27.4903	27.4685	27.7807	27.5087	27.5886		-0.0217361	0.942318		0.290372	0.658317		0.0184345	0.9778		0.0982742	0.734963		0.312108	0.31258		0.0401707	0.946797		0.12001	0.733716		0.519913		27.4938	27.5536	27.4234	27.6181	27.3325	27.4551	27.7958	27.8799	27.6663	27.6865	27.2077	27.632	27.3745	27.6458	27.7453
EIF3B	Eukaryotic translation initiation factor 3 subunit B	B4DV79;F8W8C8;P55884;P55884-2	28.4217	28.4109	28.646	28.6671	28.5257		-0.010753	0.983386		0.224334	0.791783		0.245395	0.659519		0.10408	0.779125		0.235087	0.395406		0.256148	0.571529		0.114833	0.672702		0.488343		28.2262	28.3325	28.7064	28.3282	28.2935	28.611	28.6004	28.6181	28.7195	28.5862	28.6285	28.7864	28.4591	28.5646	28.5536
EIF3C	Eukaryotic translation initiation factor 3 subunit C;Eukaryotic translation initiation factor 3 subunit C-like protein	B4DVQ5;F5H4V1;Q99613;B5ME19;B4DVU3;C9J1F3;B4DDN4;H3BRV0;B4DRU0	27.066	27.1555	27.2918	26.9815	26.8797		0.0895392	0.824709		0.225864	0.799443		-0.0844714	0.774857		-0.186242	0.715302		0.136325	0.761989		-0.174011	0.694863		-0.275781	0.624286		0.530227		26.9316	27.0401	27.2262	27.1604	27.3745	26.9316	27.0711	27.524	27.2803	27.0711	26.8973	26.976	26.521	27.1312	26.9869
EIF3D	Eukaryotic translation initiation factor 3 subunit D	B4DVY1;A8MWD3;O15371	26.8972	26.8879	26.8954	26.7738	26.8414		-0.00934601	0.971407		-0.00185458	0.996262		-0.12347	0.775469		-0.0557982	0.79852		0.00749143	0.972099		-0.114124	0.814379		-0.0464522	0.769108		0.848592		26.9316	27.0084	26.7518	26.8019	26.8858	26.976	26.9869	26.8973	26.8019	26.7389	26.574	27.0084	26.7645	26.8858	26.8741
EIF3E	Eukaryotic translation initiation factor 3 subunit E	P60228;E5RGA2	27.6189	27.1912	27.6196	27.36	27.1744		-0.42769	0.556459		0.000719706	0.997789		-0.258927	0.63454		-0.444477	0.474919		0.42841	0.427345		0.168763	0.848535		-0.0167872	0.985698		0.395887		27.4938	27.5609	27.8019	27.2979	26.7895	27.4862	27.5536	27.6663	27.6389	27.2803	27.217	27.5826	26.8504	27.3066	27.3662
EIF3F	Eukaryotic translation initiation factor 3 subunit F	B4DMT5;B3KSH1;O00303	27.7581	27.3851	27.7275	27.5324	27.6575		-0.372953	0.483312		-0.0305627	0.96336		-0.225707	0.685949		-0.100563	0.714895		0.342391	0.302632		0.147247	0.780245		0.27239	0.376271		0.359724		27.9146	27.5826	27.7771	27.2979	27.341	27.5165	27.5754	27.7389	27.8682	27.2714	27.673	27.6527	27.5609	27.7453	27.6663
EIF3G	Eukaryotic translation initiation factor 3 subunit G	O75821	25.2881	25.1703	25.3109	25.2811	25.2219		-0.117785	0.890523		0.0227248	0.985961		-0.00706991	0.990923		-0.0661882	0.927008		0.140509	0.834843		0.110715	0.877917		0.0515963	0.932837		0.983887		24.8288	25.4008	25.6348	24.976	24.9977	25.5374	25.2856	25.6153	25.0317	25.4298	25.2607	25.1527	25.4923	25.1293	25.0443
EIF3H	Eukaryotic translation initiation factor 3 subunit H	O15372;E5RJT0	25.6742	25.624	25.1799	24.7555	24.0474		-0.0502561	0.979794		-0.494345	0.84622		-0.918762	0.74182		-1.6268	0.458958		-0.444089	0.686497		-0.868505	0.779965		-1.57655	0.396374		0.48486		26.6595	24.9271	25.4362	24.7543	26.1527	25.965	24.8385	25.4298	25.2714	24.9977	25.9043	23.3645	23.8191	24.7594	23.5638
EIF3I	Eukaryotic translation initiation factor 3 subunit I	Q13347	27.2341	27.3453	27.3628	27.3542	27.2907		0.111275	0.787166		0.128678	0.862963		0.120081	0.729337		0.0566336	0.838076		0.0174033	0.97696		0.00880623	0.985004		-0.0546411	0.862816		0.931814		27.0711	27.2077	27.4234	27.17	27.5682	27.2979	27.1015	27.341	27.6458	27.3325	27.3066	27.4234	27.2077	27.3578	27.3066
EIF3J	Eukaryotic translation initiation factor 3 subunit J	B4DUI3;F5H425;O75822	24.5702	23.4065	24.4062	24.8013	23.1138		-1.16361	0.478574		-0.163979	0.927646		0.231174	0.606634		-1.45632	0.555833		0.999633	0.453524		1.39479	0.55312		-0.292708	0.90524		0.392085		24.6153	24.4088	24.6865	23.4213	22.7784	24.02	23.6676	25.0105	24.5404	24.7024	24.9271	24.7746	22.6314	24.824	21.8861
EIF3K	Eukaryotic translation initiation factor 3 subunit K	B7ZAM9;Q9UBQ5	27.1039	26.9176	27.3725	27.3579	27.209		-0.186268	0.703081		0.268629	0.799968		0.254025	0.731788		0.105085	0.747075		0.454898	0.328201		0.440293	0.58187		0.291353	0.447948		0.453307		26.9202	27.0505	27.341	27.0608	27.019	26.673	27.3325	27.217	27.5682	27.1115	27.217	27.7453	27.2979	27.1214	27.2077
EIF3L	Eukaryotic translation initiation factor 3 subunit L	B0QY89;Q9Y262;G8JLH4;B0QY90	28.5842	28.7154	28.5771	28.6672	28.5999		0.131155	0.527527		-0.00707944	0.973703		0.0829709	0.841879		0.0157407	0.916186		-0.138234	0.3207		-0.0481841	0.92152		-0.115414	0.463584		0.760957		28.524	28.6424	28.5862	28.6561	28.7771	28.7129	28.5898	28.6251	28.5165	28.4512	28.6216	28.9288	28.5352	28.6964	28.5682
EIF3M	Eukaryotic translation initiation factor 3 subunit M	Q7L2H7;B4E2Q4;H0YCQ8	27.1801	27.1093	27.202	26.9783	26.8438		-0.0707575	0.804105		0.0218684	0.987479		-0.201804	0.61991		-0.33633	0.433529		0.0926259	0.900241		-0.131046	0.760252		-0.265572	0.431167		0.592965		27.217	27.2625	27.0608	27.217	27.1795	26.9316	27.3992	26.7129	27.4938	26.9316	26.8623	27.141	26.9539	26.8385	26.7389
EIF4A1	Eukaryotic initiation factor 4A-I	P60842	30.9491	30.8892	31.1067	30.8543	31.0336		-0.0599283	0.743425		0.157584	0.810313		-0.0948105	0.850619		0.0844854	0.655562		0.217512	0.314026		-0.0348822	0.952881		0.144414	0.414777		0.568238		30.8459	30.947	31.0544	30.933	30.8157	30.9188	30.9882	31.13	31.2019	30.6372	30.7533	31.1724	30.9814	31.0017	31.1177
EIF4A2	Eukaryotic initiation factor 4A-II;Eukaryotic initiation factor 4A-II, N-terminally processed	Q14240-2	27.7453	27.2182	27.9604	27.7514	27.811		-0.527096	0.543382		0.21508	0.846263		0.00608381	0.992389		0.0656954	0.916919		0.742176	0.10855		0.53318	0.500737		0.592791	0.222491		0.243868		27.4314	27.5969	28.2077	27.0608	27.2445	27.3494	28.0137	27.8916	27.976	27.8623	27.7325	27.6595	27.7064	27.9372	27.7895
EIF4B	Eukaryotic translation initiation factor 4B	E7EPC9;E7EX17;P23588;B4DS13	28.4771	28.7354	28.6119	28.7445	28.3625		0.258266	0.575398		0.134764	0.86585		0.267387	0.726687		-0.114612	0.83794		-0.123502	0.759487		0.00912094	0.991646		-0.372878	0.476744		0.636522		28.579	28.6216	28.2308	28.8264	28.7864	28.5934	28.7989	28.3239	28.7129	28.362	28.8081	29.0634	28.5128	27.9814	28.5934
EIF4E	Eukaryotic translation initiation factor 4E	D6RBW1;P06730;P06730-3;P06730-2;H0Y8J7	28.7597	28.5098	28.8842	28.6906	28.729		-0.249861	0.585393		0.124557	0.86139		-0.0690975	0.89863		-0.0307115	0.931159		0.374419	0.307498		0.180764	0.708266		0.21915	0.422322		0.511488		29.0084	28.6146	28.6561	28.5052	28.3992	28.6251	28.8415	29.0788	28.7325	28.4785	28.6561	28.9372	28.7031	28.6424	28.8415
EIF4G1	Eukaryotic translation initiation factor 4 gamma 1	E7EX73;E9PGM1;E7EUU4;Q04637-5;Q04637-4;Q04637-3;Q04637;E9PFM1;Q04637-6;G5E9S1;C9JF13	29.1674	29.0908	29.1665	29.0548	29.1402		-0.0765457	0.717068		-0.000921885	0.997323		-0.11255	0.778832		-0.0271937	0.928133		0.0756238	0.727283		-0.0360044	0.941357		0.049352	0.868713		0.907912		29.0889	29.1507	29.2625	29.1771	28.9814	29.114	29.1724	29.2869	29.0401	28.965	28.906	29.2935	28.9512	29.1628	29.3066
EIF4G2	Eukaryotic translation initiation factor 4 gamma 2	P78344;D3DQV9;P78344-2;H0Y3P2	29.1714	29.2656	29.4033	29.2037	29.1927		0.0942637	0.528588		0.231983	0.52456		0.03239	0.874983		0.0213184	0.868078		0.137719	0.351309		-0.0618738	0.814969		-0.0729453	0.617775		0.288017		29.1724	29.141	29.2007	29.2512	29.3217	29.2239	29.391	29.4823	29.3367	29.1115	29.1652	29.3346	29.1604	29.2913	29.1263
EIF4H	Eukaryotic translation initiation factor 4H	Q15056-2;Q15056	29.33	29.2176	29.4565	29.3719	29.5022		-0.11237	0.71217		0.126493	0.827106		0.0419019	0.931619		0.172202	0.557755		0.238863	0.286724		0.154272	0.688081		0.284572	0.307322		0.452445		29.524	29.2467	29.2193	29.1361	29.3044	29.2123	29.3515	29.5033	29.5146	29.1819	29.3766	29.5573	29.4746	29.5808	29.4512
EIF5	Eukaryotic translation initiation factor 5	P55010;H0YLZ1;H0YN40	26.7975	26.2631	26.9754	26.5015	26.567		-0.534451	0.539065		0.177847	0.855904		-0.296059	0.683545		-0.230492	0.728604		0.712297	0.203294		0.238392	0.625732		0.303959	0.55975		0.294065		26.9089	26.4024	27.0813	26.4999	26.204	26.0854	26.9869	27.019	26.9202	26.3695	26.5754	26.5595	26.275	26.8623	26.5638
EIF5A	Eukaryotic translation initiation factor 5A-1;Eukaryotic translation initiation factor 5A;Eukaryotic translation initiation factor 5A-1-like	P63241;I3L397;I3L504;P63241-2;Q6IS14	30.6883	30.9454	30.8068	31.1102	31.2147		0.257146	0.608698		0.118547	0.841949		0.42193	0.620987		0.526428	0.442693		-0.138599	0.652209		0.164784	0.836255		0.269281	0.526421		0.338016		30.4727	30.8309	30.7613	30.7211	31.1544	30.9609	30.8901	30.7771	30.7533	30.8459	31.0414	31.4433	31.2924	30.995	31.3568
EIF5B	Eukaryotic translation initiation factor 5B	O60841	25.3863	25.4388	24.5566	25.8393	25.6469		0.0524839	0.959008		-0.829685	0.880441		0.453021	0.726666		0.260573	0.745058		-0.882169	0.792366		0.400537	0.665158		0.208089	0.547142		0.790573		25.5165	24.7895	25.8528	25.391	25.3101	25.6153	25.895	25.8361	21.9387	26.3477	25.5522	25.6181	25.5754	25.8457	25.5195
EIF6	Eukaryotic translation initiation factor 6	P56537;B7ZBG9	26.4953	26.8454	26.8365	26.7735	26.6749		0.350073	0.578438		0.341181	0.841454		0.278151	0.658833		0.179589	0.821923		-0.00889206	0.991333		-0.0719223	0.921127		-0.170485	0.837538		0.763914		26.4378	26.726	26.3222	26.6181	26.7771	27.141	27.019	26.726	26.7645	26.8264	26.518	26.976	26.9316	26.0955	26.9977
ELAVL1	ELAV-like protein 1	Q15717	25.1203	25.6642	23.4072	23.9277	24.407		0.543826	0.703347		-1.71311	0.810472		-1.19267	0.730217		-0.713319	0.770455		-2.25694	0.457793		-1.73649	0.618397		-1.25714	0.57174		0.623894		24.2019	25.6012	25.558	25.9539	25.2244	25.8142	22.9674	21.5866	25.6676	25.8019	22.4988	23.4823	25.1871	22.6695	25.3645
ELMO1	Engulfment and cell motility protein 1	Q92556;B4DJV6;Q92556-3	27.4631	27.6253	27.8198	27.6373	27.6305		0.162149	0.71181		0.356702	0.761291		0.174215	0.746822		0.167411	0.618304		0.194553	0.447427		0.0120659	0.985196		0.00526237	0.988482		0.502104		27.217	27.5898	27.5826	27.524	27.5315	27.8203	27.7771	27.8142	27.8682	27.3992	27.6865	27.8264	27.5536	27.6251	27.7129
ELP5	Elongator complex protein 5	I3L1Q3;Q8TE02;Q8TE02-4;I3L2A9;I3L2T0;I3L3N8;I3L437;Q8TE02-3;Q8TE02-2	23.7727	23.6982	23.6415	22.8218	23.2212		-0.0745366	0.960782		-0.131259	0.91942		-0.950984	0.327951		-0.551547	0.548173		-0.0567226	0.974335		-0.876447	0.627977		-0.477011	0.762292		0.522737		23.7594	23.7995	23.7594	23.9949	24.417	22.6827	23.756	24.0853	23.0832	22.7762	22.9998	22.6892	22.9343	23.867	22.8623
EMC1	ER membrane protein complex subunit 1	Q8N766-4;Q8N766-2;Q8N766;Q5TG60;H7BYA9;Q8N766-3	23.8699	22.623	23.0619	22.9902	24.1125		0	0		0	0		-0.879759	0.735289		0.242585	0.86971		0	0		0.367144	0.896083		1.48949	0.40146		0.518454		23.1297	23.5384	24.9416	22.0543	22.2493	23.5654	22.9277	22.4341	23.824	23.7594	23.4245	21.7866	23.5983	24.5522	24.1871
EMC2	ER membrane protein complex subunit 2	Q15006;H0YAS9	24.9389	25.397	24.143	25.3313	25.1088		0.458034	0.453827		-0.795909	0.880926		0.392347	0.592056		0.169905	0.690303		-1.25394	0.677181		-0.0656865	0.920469		-0.288129	0.564683		0.746305		24.9628	24.9406	24.9134	25.5638	25.4362	25.1908	21.5912	25.217	25.6209	25.5165	25.433	25.0443	25.433	25.0359	24.8576
EMC8	ER membrane protein complex subunit 8	O43402;C9JB21	24.1447	24.2318	23.5921	24.8874	24.7546		0.0871525	0.95786		-0.552544	0.862692		0.742715	0.674507		0.609932	0.619831		-0.639696	0.675516		0.655563	0.583962		0.522779	0.471772		0.492696		23.2337	24.4614	24.7389	23.8446	24.1698	24.6811	23.0051	22.9669	24.8044	25.1795	24.4551	25.0275	24.654	25.0401	24.5696
EMD	Emerin	P50402;Q5HY57	26.9445	27.1201	27.1003	27.2917	27.4595		0.175549	0.880627		0.155767	0.917654		0.347186	0.735441		0.514971	0.581503		-0.0197811	0.984279		0.171638	0.864127		0.339423	0.6653		0.697316		26.425	27.5463	26.8623	26.8623	26.8385	27.6595	27.2262	27.189	26.8858	27.17	27.2979	27.4073	27.189	27.673	27.5165
EMILIN1	EMILIN-1	Q9Y6C2	30.5381	30.4933	30.4583	30.3347	30.3374		-0.044817	0.954155		-0.0797869	0.940895		-0.203423	0.779202		-0.200748	0.733663		-0.03497	0.850097		-0.158606	0.587854		-0.155931	0.38105		0.7842		30.196	30.995	30.4234	30.5296	30.5573	30.393	30.4823	30.3724	30.5203	30.2422	30.3088	30.4532	30.3303	30.3303	30.3515
EML2	Echinoderm microtubule-associated protein-like 2	O95834;O95834-2;F5GYW5;C9JRL6	29.5647	30.0966	29.8246	29.9304	29.8765		0.5319	0.423995		0.2599	0.808576		0.365702	0.814022		0.311807	0.500138		-0.271999	0.270261		-0.166197	0.544953		-0.220093	0.486136		0.210943		29.4957	29.7276	29.4707	30.0084	30.2077	30.0737	29.7708	29.7771	29.9259	29.9117	29.9117	29.9677	29.7692	29.7613	30.099
EML3	Echinoderm microtubule-associated protein-like 3	B7WPE2;Q32P44;G3V195;H0Y3M3;Q32P44-2;G3V1D0	27.3876	27.1687	27.374	27.3393	27.4529		-0.218921	0.54602		-0.0136147	0.984951		-0.0483138	0.877442		0.0652517	0.816844		0.205306	0.488112		0.170607	0.537814		0.284173	0.330078		0.487995		27.4938	27.1984	27.4707	27.1312	27.1214	27.2535	27.1604	27.4154	27.5463	27.2445	27.4073	27.3662	27.3494	27.4629	27.5463
EML4	Echinoderm microtubule-associated protein-like 4	B5MBZ0;Q9HC35;B5MCW9	26.7301	27.0248	26.6232	26.9567	26.8448		0.294692	0.574319		-0.106953	0.841123		0.226563	0.710055		0.1147	0.622188		-0.401644	0.425004		-0.0681286	0.936508		-0.179992	0.706416		0.522894		26.7518	26.7389	26.6998	26.965	27.3325	26.7771	26.4218	26.8019	26.6458	26.6865	26.8858	27.2979	26.6998	26.8264	27.0084
ENDOD1	Endonuclease domain-containing 1 protein	O94919	27.8615	28.0064	27.9157	28.4095	28.6272		0.144843	0.783266		0.0541712	0.927929		0.548031	0.809368		0.765729	0.376794		-0.0906715	0.857217		0.403188	0.544851		0.620886	0.349541		0.112651		27.7325	28.0813	27.7708	27.726	28.0084	28.2847	28.0762	27.8264	27.8445	28.4591	28.3951	28.3745	28.5315	28.6146	28.7357
ENO1	Alpha-enolase	P06733;P06733-2	34.0667	34.2186	34.1244	34.4222	34.3726		0.151958	0.548415		0.057752	0.853259		0.355499	0.612812		0.305954	0.473043		-0.0942065	0.376706		0.203541	0.683818		0.153996	0.579545		0.348625		34.0348	33.9677	34.1975	34.1604	34.2619	34.2336	34.1377	34.1604	34.0753	34.2619	34.2897	34.715	34.5354	34.1679	34.4146
ENO2	Gamma-enolase;Enolase	P09104;B7Z2X9;F5H0C8	29.7438	30.222	30.0146	30.235	30.2534		0.478131	0.615007		0.270734	0.851976		0.491171	0.675619		0.509551	0.581437		-0.207397	0.442466		0.0130399	0.985167		0.0314204	0.95446		0.552487		29.4785	30.362	29.391	30.0608	30.2535	30.3515	30.0349	29.8973	30.1115	30.1239	30.0608	30.5203	30.2535	29.9677	30.5389
ENOPH1	Enolase-phosphatase E1	D6RA00;Q9UHY7-2;Q9UHY7	24.7801	25.2137	25.8711	24.6127	26.2946		0.433608	0.926086		1.09099	0.834376		-0.167418	0.979061		1.5145	0.571051		0.657381	0.827687		-0.601027	0.916696		1.08089	0.70357		0.758616		25.8927	25.6811	22.7666	26.7389	23.0881	25.8142	26.4425	25.5195	25.6513	22.3666	25.6403	25.8312	26.3712	26.1565	26.3562
ENOSF1	Mitochondrial enolase superfamily member 1	Q7L5Y1;A6NMP3;F5H1W8;B3KSL6;Q7L5Y1-2	26.6453	22.7939	23.1152	22.5125	23.8267		-3.85138	0.547169		-3.53006	0.835966		-4.13281	0.591591		-2.81857	0.549617		0	0		0	0		0	0		0.284359		28.579	27.8142	23.5427	22.0356	23.8321	22.5141	22.3236	23.376	23.6461	22.4086	22.0508	23.078	23.7347	23.4764	24.2691
ENPP4	Bis(5-adenosyl)-triphosphatase ENPP4	Q9Y6X5	24.5199	25.0516	24.9479	25.0355	25.2848		0.531712	0.523871		0.427973	0.684278		0.515621	0.746063		0.764881	0.424471		-0.103739	0.816585		-0.0160917	0.979625		0.233169	0.574648		0.19468		24.3031	24.5754	24.6811	24.7796	25.3477	25.0275	24.8764	24.9271	25.0401	25.0894	24.8997	25.1174	25.2244	25.2856	25.3443
ENSA	Alpha-endosulfine	A6NMQ3;C9JUF4;Q5T5H1;O43768-2;O43768;E9PB69;O43768-3;O43768-4;O43768-6;O43768-5;O43768-7;D6RE62;O43768-8	27.2078	27.2321	27.2609	27.4076	27.4933		0.0243708	0.967192		0.053098	0.957894		0.199806	0.734948		0.285545	0.5622		0.0287272	0.928644		0.175435	0.583267		0.261175	0.351884		0.528374		26.8973	27.509	27.217	27.3662	27.1507	27.1795	27.1015	27.3745	27.3066	27.5014	27.2979	27.4234	27.4629	27.4707	27.5463
EOGT	EGF domain-specific O-linked N-acetylglucosamine transferase	Q5NDL2;A8K2U1;Q5NDL2-3;B4E243	25.9487	25.6863	26.166	25.9965	25.9279		-0.262364	0.718854		0.21729	0.828913		0.0477867	0.943976		-0.0208499	0.968378		0.479654	0.368223		0.310151	0.644305		0.241514	0.624034		0.493129		26.0464	25.5754	26.2244	25.9495	25.3101	25.7995	26.1946	26.1469	26.1565	26.0148	26.0567	25.918	25.9517	25.8647	25.9672
EPB41	Protein 4.1	H3BLV6;P11171-2;P11171;P11171-4;P11171-3;E9PEX0;P11171-5;P11171-6;E9PEW9;C9JTS2;P11171-7	27.8694	28.1364	27.8059	28.1001	27.878		0.267082	0.673344		-0.0634003	0.961102		0.230793	0.717029		0.00866826	0.987242		-0.330482	0.508907		-0.0362886	0.941507		-0.258413	0.58484		0.645453		27.5014	27.9705	28.1361	28.2759	27.8799	28.2535	28.066	27.5014	27.8504	28.0137	28.1263	28.1604	28.0914	27.611	27.9316
EPB41L3	Band 4.1-like protein 3;Band 4.1-like protein 3, N-terminally processed	A8K968;Q9Y2J2-2;Q9Y2J2;F5GX05;Q9Y2J2-3;E7EUF8;F5H7W5	24.9329	24.6834	24.829	24.9863	25.4988		-0.249512	0.817933		-0.10394	0.952696		0.0533498	0.977877		0.565836	0.566994		0.145571	0.831639		0.302862	0.847818		0.815348	0.379766		0.568241		25.5165	24.3239	24.9584	24.3239	24.6209	25.1055	24.8288	24.6264	25.0317	25.2961	24.275	25.3877	25.2244	25.6125	25.6595
EPHX2	Bifunctional epoxide hydrolase 2;Cytosolic epoxide hydrolase 2;Lipid-phosphate phosphatase	P34913;B4E1M2;E5RFU2;G3V134;E5RFH6	27.803	27.6361	28.314	27.8479	28.021		-0.166932	0.738789		0.510986	0.813951		0.0449238	0.953217		0.217985	0.739088		0.677917	0.280417		0.211856	0.695031		0.384917	0.486297		0.402966		27.9977	27.4629	27.9484	27.4785	27.6527	27.7771	28.0505	28.2354	28.6561	27.6181	27.8142	28.1115	27.6527	28.3494	28.0608
EPN1	Epsin-1	Q9Y6I3-3;Q9Y6I3;Q9Y6I3-1;B4DU91	25.2494	26.0924	25.3405	25.9903	24.3593		0.842977	0.52676		0.0910886	0.973551		0.740943	0.615142		-0.890109	0.676549		-0.751888	0.524849		-0.102034	0.911331		-1.73309	0.451143		0.437105		24.6595	25.5812	25.5075	26.0233	26.0443	26.2096	25.8385	24.3493	25.8336	26.1371	25.5014	26.3325	25.824	24.2016	23.0523
EPRS	Bifunctional glutamate/proline--tRNA ligase;Glutamate--tRNA ligase;Proline--tRNA ligase	P07814	27.1563	27.4823	27.2799	27.2655	27.3936		0.325923	0.590478		0.123601	0.864377		0.109168	0.878633		0.237204	0.655095		-0.202322	0.421226		-0.216754	0.755093		-0.0887184	0.821754		0.688498		27.0401	26.9428	27.4862	27.391	27.673	27.3828	27.3066	27.2354	27.2979	26.9316	27.341	27.524	27.2077	27.341	27.632
EPS15	Epidermal growth factor receptor substrate 15	P42566;B1AUU8	28.9129	29.0377	29.0217	29.0315	28.9856		0.12487	0.621638		0.108889	0.809424		0.118595	0.715616		0.07271	0.731697		-0.015981	0.928021		-0.00627454	0.984698		-0.0521596	0.745811		0.710306		28.9923	28.9787	28.7676	29.0965	28.9456	29.0711	29.0349	29.0737	28.9567	28.9002	29.0531	29.141	28.9456	29.0711	28.94
EPS15L1	Epidermal growth factor receptor substrate 15-like 1	A2RRF3;Q9UBC2;Q9UBC2-2	29.573	29.6794	29.7237	29.8055	29.8044		0.106427	0.794895		0.150721	0.833818		0.232463	0.656026		0.231359	0.577235		0.0442937	0.816805		0.126036	0.635419		0.124933	0.617916		0.561767		29.4512	29.8504	29.4174	29.6458	29.5844	29.8081	29.708	29.6814	29.7818	29.7502	29.7849	29.8814	29.8623	29.6578	29.893
ERAP1	Endoplasmic reticulum aminopeptidase 1	Q9NZ08;Q9NZ08-2	29.8806	29.6699	29.8493	29.8099	29.7523		-0.210691	0.902763		-0.0312926	0.991258		-0.0706762	0.973521		-0.128291	0.931		0.179398	0.804452		0.140015	0.859719		0.0824	0.901201		0.992163		28.8799	30.0084	30.7533	29.9259	29.7771	29.3066	30.1115	29.995	29.4413	30.0084	29.8279	29.5934	30.0349	29.8066	29.4154
ERAP2	Endoplasmic reticulum aminopeptidase 2	Q6P179-3;Q6P179	23.9201	23.5151	24.0077	23.3369	23.7315		-0.405011	0.824964		0.0875791	0.973379		-0.583277	0.739246		-0.188616	0.894413		0.49259	0.67831		-0.178267	0.921508		0.216394	0.868519		0.799134		24.5225	22.914	24.3239	22.598	23.8783	24.0691	23.654	23.9847	24.3844	22.8443	23.6431	23.5232	23.5404	24.2096	23.4446
ERBB2IP	Protein LAP2	Q96RT1-7;Q96RT1-6;Q96RT1-4;Q96RT1-5;Q96RT1-3;E7EQW9;Q96RT1-2;Q96RT1;E9PCR8;B4DIP2	27.1782	27.0435	27.3646	27.1105	27.3424		-0.134783	0.761915		0.186321	0.821729		-0.067702	0.886106		0.164193	0.828048		0.321103	0.323542		0.0670808	0.882995		0.298976	0.679905		0.695736		27.1115	26.976	27.4473	26.9977	27.2354	26.8973	27.3494	27.2891	27.4551	27.17	27.2077	26.9539	26.9539	27.8564	27.217
ERC1	ELKS/Rab6-interacting/CAST family member 1	G8JLD3;Q8IUD2;Q8IUD2-3;F5H185;G8JLM9;Q8IUD2-4;Q8IUD2-2;F5H327;G8JLA4;Q8IUD2-5	25.5707	25.2471	25.2535	25.1783	25.0015		-0.323599	0.542311		-0.317204	0.830053		-0.392356	0.623245		-0.569153	0.431388		0.0063947	0.983088		-0.0687574	0.920583		-0.245554	0.444125		0.318999		25.824	25.4266	25.4614	25.2499	25.1135	25.3778	25.2058	25.217	25.3376	25.5195	25.0526	24.9628	24.8481	25.0233	25.1332
ERLEC1	Endoplasmic reticulum lectin 1	B5MC72;Q96DZ1;Q96DZ1-2	25.1332	25.2079	25.3424	25.3903	25.6015		0.0747859	0.90931		0.209198	0.844426		0.257112	0.715491		0.468386	0.549404		0.134412	0.390239		0.182326	0.540361		0.3936	0.416088		0.44733		25.4298	25.2463	24.7234	25.1871	25.2996	25.1371	25.3745	25.3811	25.2714	25.341	25.3376	25.4923	25.8552	25.5983	25.3511
ERLIN2	Erlin-2	E5RHW4;O94905;E5RJ09	24.2245	24.1342	25.1717	24.9417	25.1114		-0.090318	0.9765		0.947248	0.846825		0.7172	0.803118		0.886934	0.732633		1.03757	0.337203		0.807518	0.569294		0.977252	0.430173		0.66516		22.1858	25.1604	25.3273	23.4448	24.2821	24.6757	25.2207	25.002	25.2926	24.8997	24.824	25.1015	24.7945	25.391	25.1488
ERO1LB	ERO1-like protein beta	Q86YB8;Q5TAE8	25.3188	24.1813	25.0471	24.7878	25.1956		-1.13752	0.661646		-0.271656	0.811828		-0.530924	0.601736		-0.123145	0.720407		0.865859	0.673565		0.606591	0.852887		1.01437	0.649782		0.606151		25.1757	25.5898	25.1908	22.441	24.9271	25.1757	25.1795	25.0484	24.9134	24.7695	24.8811	24.7129	25.1604	25.2207	25.2058
ERP29	Endoplasmic reticulum resident protein 29	P30040;F8VY02	29.7601	29.7595	29.8828	29.91	29.9338		-0.000511805	0.998141		0.122704	0.852785		0.149974	0.711052		0.17373	0.550122		0.123215	0.719543		0.150485	0.673849		0.174241	0.466134		0.67953		29.7645	29.5898	29.9259	29.6458	29.7211	29.9117	30.0737	29.6629	29.9117	29.8081	29.8741	30.0479	29.9814	29.8799	29.94
ERP44	Endoplasmic reticulum resident protein 44	Q9BS26	29.5275	29.8866	29.6227	29.7299	29.67		0.359083	0.5483		0.0951913	0.890287		0.202383	0.721748		0.142431	0.723758		-0.263892	0.382257		-0.1567	0.687006		-0.216653	0.437299		0.480511		29.6527	29.7129	29.217	29.8973	30.0349	29.7276	29.7373	29.6389	29.4919	29.6268	29.6714	29.8916	29.6389	29.632	29.7389
ESAM	Endothelial cell-selective adhesion molecule	Q96AP7;F8WDW9	27.7153	28.1193	27.7228	28.0122	28.1519		0.404028	0.611827		0.00747808	0.996023		0.296847	0.734599		0.436566	0.562944		-0.39655	0.445309		-0.107181	0.860271		0.0325381	0.943643		0.523311		27.2891	28.1115	27.7453	27.976	28.3109	28.0711	27.6865	27.4314	28.0505	28.1984	28.0864	27.7518	28.0453	28.4073	28.003
ESD	S-formylglutathione hydrolase	P10768;H7BZT7	29.7856	30.0602	29.9538	29.9909	30.0323		0.274583	0.601813		0.168122	0.826686		0.205241	0.612208		0.246687	0.47734		-0.106461	0.776396		-0.0693417	0.909982		-0.0278956	0.95572		0.55827		29.8035	29.8973	29.6561	30.1483	30.2647	29.7676	29.9259	29.9539	29.9814	30.0084	29.8653	30.099	30.1604	30.0479	29.8887
ESYT1	Extended synaptotagmin-1	Q9BSJ8;Q9BSJ8-2;B3KY56	28.2079	28.2038	28.3547	28.6949	29.0203		-0.00407028	0.997533		0.146765	0.936697		0.486953	0.722875		0.812399	0.522982		0.150835	0.817217		0.491023	0.629387		0.816469	0.381407		0.413988		27.4394	28.7771	28.4073	27.7064	28.4113	28.4938	28.341	28.3992	28.3239	28.5646	28.5278	28.9923	28.8234	29.099	29.1386
ESYT2	Extended synaptotagmin-2	H7BXI1;A0FGR8-2;A0FGR8;A0FGR8-6;C9JGI7;A0FGR8-4	25.4454	25.7509	25.3971	26.1698	26.466		0.305483	0.726665		-0.0482686	0.971458		0.724366	0.616511		1.0206	0.433764		-0.353752	0.541933		0.418883	0.673847		0.715113	0.39		0.2032		25.1449	25.9271	25.2643	25.5344	25.5255	26.1927	25.5075	25.1795	25.5045	25.772	26.3578	26.3795	26.4785	26.4488	26.4707
ETF1	Eukaryotic peptide chain release factor subunit 1	P62495;B7Z7P8;Q96CG1	28.494	28.6705	28.6798	28.7267	28.6992		0.17657	0.547264		0.185848	0.813017		0.232749	0.620796		0.205203	0.462097		0.00927798	0.977828		0.056179	0.905326		0.0286338	0.908732		0.561945		28.4154	28.5499	28.5165	28.8081	28.6389	28.5646	28.7927	28.7227	28.524	28.6389	28.604	28.9372	28.7739	28.5718	28.7518
ETFA	Electron transfer flavoprotein subunit alpha, mitochondrial	P13804;H0YLU7;P13804-2;H0YL12;H0YKF0;H0YK49;H0YNX6	27.7027	28.1418	28.0733	28.4492	28.573		0.439092	0.584066		0.370598	0.797628		0.746522	0.571057		0.870269	0.432088		-0.0684942	0.897616		0.30743	0.66559		0.431177	0.441904		0.26807		27.3828	28.0864	27.6389	28.0505	28.4154	27.9595	28.0349	27.8741	28.3109	28.604	28.1361	28.6075	28.5969	28.7895	28.3325
ETFB	Electron transfer flavoprotein subunit beta	P38117;P38117-2	26.6535	26.8127	26.744	27.181	27.1131		0.159216	0.8026		0.0905291	0.875094		0.527497	0.597853		0.459559	0.457276		-0.0686868	0.917567		0.368281	0.674473		0.300343	0.624868		0.397408		26.4707	26.604	26.8858	26.5045	27.2077	26.726	26.632	26.726	26.8741	27.3828	26.8623	27.2979	27.019	27.3662	26.9539
ETHE1	Persulfide dioxygenase ETHE1, mitochondrial	O95571	26.4536	26.2287	26.4015	26.7026	26.8849		-0.224951	0.816716		-0.0521406	0.970884		0.24898	0.772048		0.431246	0.554024		0.17281	0.827746		0.473931	0.627029		0.656197	0.426616		0.47204		26.433	26.019	26.9089	26.1312	26.726	25.8288	26.673	26.2058	26.3256	26.604	26.8858	26.6181	26.9089	26.9316	26.8142
EVI5L	EVI5-like protein	Q96CN4;Q96CN4-2	24.7306	24.2687	24.3102	24.1536	24.1606		-0.461912	0.612317		-0.420418	0.815553		-0.577009	0.599477		-0.56999	0.458307		0.0414937	0.966226		-0.115098	0.901717		-0.108079	0.880199		0.472826		24.9672	24.4551	24.7695	24.7492	24.1253	23.9316	23.9584	24.4738	24.4984	24.2821	24.1015	24.0772	24.4105	23.9225	24.1488
EXOC1	Exocyst complex component 1	Q9NV70-2;Q9NV70	27.5416	26.976	27.6193	27.4385	27.5249		-0.565667	0.417812		0.0776653	0.890271		-0.103136	0.840013		-0.0167777	0.96169		0.643332	0.218432		0.462531	0.535531		0.548889	0.306584		0.239471		27.5826	27.3828	27.6595	26.976	26.8504	27.1015	27.524	27.8324	27.5014	27.5014	27.141	27.673	27.5826	27.3325	27.6595
EXOC2	Exocyst complex component 2	Q96KP1	27.7971	27.3096	27.7091	27.5331	27.5107		-0.48752	0.545001		-0.0879834	0.925527		-0.263988	0.713842		-0.286408	0.622517		0.399536	0.236228		0.223531	0.588421		0.201111	0.536997		0.400477		28.1214	27.4314	27.8385	27.4073	27.3325	27.189	27.632	27.8564	27.6389	27.4234	27.4629	27.7129	27.2891	27.6389	27.604
EXOC3	Exocyst complex component 3	H7BXW1;O60645-2;Q6P2E8;O60645;D6RB59	27.1095	27.0623	27.1069	27.048	26.9141		-0.0471948	0.923933		-0.00260417	0.995822		-0.0614332	0.88643		-0.195333	0.567049		0.0445906	0.897774		-0.0142384	0.978087		-0.148138	0.647439		0.730779		27.1507	26.8973	27.2803	26.9089	26.9977	27.2803	27.1115	27.1795	27.0296	27.1214	26.8623	27.1604	26.8019	26.9428	26.9977
EXOC3L2	Exocyst complex component 3-like protein 2	Q2M3D2	22.6524	22.7795	22.801	23.4277	23.5078		0	0		0	0		0.775306	0.624361		0.855426	0.514765		0	0		0.648131	0.640206		0.728251	0.476093		0.470789		22.36	23.3522	22.2449	22.4759	23.4397	22.423	23.2693	22.5357	22.5979	23.7796	22.9906	23.5128	23.0593	23.7251	23.7389
EXOC3L4	Exocyst complex component 3-like protein 4	Q17RC7	27.0242	26.8115	26.9116	26.9072	26.5777		-0.212697	0.69459		-0.112671	0.815062		-0.117059	0.771724		-0.44652	0.444062		0.100026	0.847822		0.0956376	0.90748		-0.233824	0.693533		0.479835		26.9202	27.0813	27.0711	26.4394	26.9869	27.0084	26.8385	26.9202	26.976	26.673	27.0084	27.0401	26.673	26.7518	26.3084
EXOC4	Exocyst complex component 4	Q96A65;B7Z321;F5H222;F5GZT1	26.8973	26.9147	26.7589	26.88	26.8172		0.0173874	0.968141		-0.138455	0.849169		-0.0173842	0.978647		-0.0801875	0.810375		-0.155842	0.562671		-0.0347716	0.923099		-0.0975749	0.549296		0.832339		27.1507	26.7518	26.7895	26.8142	26.965	26.965	26.8741	26.5522	26.8504	26.7129	26.8973	27.0296	26.7771	26.7771	26.8973
EXOC5	Exocyst complex component 5	O00471;F8W9B8	27.1039	26.7986	27.0434	26.9348	26.9398		-0.305248	0.547831		-0.0604477	0.910464		-0.169041	0.584458		-0.164045	0.65527		0.244801	0.558186		0.136208	0.765933		0.141203	0.77023		0.608875		27.1507	27.0296	27.1312	26.7518	26.604	27.0401	26.8504	27.2714	27.0084	26.9202	26.9869	26.8973	26.726	27.2077	26.8858
EXOC6	Exocyst complex component 6	E7EW84;Q8TAG9;F2Z2Q3;E9PHI3;F2Z3K0	24.2502	24.0552	24.0051	23.5844	23.5072		-0.195023	0.807158		-0.245176	0.860474		-0.665899	0.70997		-0.743078	0.534329		-0.0501531	0.909112		-0.470876	0.76477		-0.548054	0.460955		0.593004		24.8142	23.8191	24.1174	23.9043	24.1126	24.1488	23.7492	24.1095	24.1565	24.3031	23.6764	22.7735	24.0359	23.2961	23.1895
EXOC6B	Exocyst complex component 6B	Q9Y2D4;Q9Y2D4-2	25.7776	25.5445	25.6734	25.5496	25.7185		-0.233011	0.729883		-0.10415	0.940648		-0.227963	0.781343		-0.0590343	0.929839		0.128862	0.828711		0.00504812	0.996553		0.173977	0.555324		0.890863		26.0935	25.3031	25.9361	25.5609	25.6784	25.3943	25.6784	26.0317	25.3101	25.239	25.6838	25.726	25.5492	25.8019	25.8044
EXOC7	Exocyst complex component 7	Q9UPT5-2;Q9UPT5-5;Q9UPT5-1;Q9UPT5-6;Q9UPT5;F5H1P1;F8W6Q7	26.8091	26.3535	26.7729	26.7266	26.6037		-0.455556	0.537434		-0.0362015	0.960337		-0.0824795	0.862832		-0.205373	0.503871		0.419354	0.445049		0.373076	0.641886		0.250182	0.603502		0.464899		26.8858	26.7771	26.7645	26.2607	26.1135	26.6865	26.5285	26.976	26.8142	26.6595	26.4908	27.0296	26.4394	26.726	26.6458
EXOC8	Exocyst complex component 8	Q8IYI6	26.8713	27.0193	26.6013	26.9072	26.5778		0.14795	0.668165		-0.270033	0.801152		0.0359173	0.918112		-0.293528	0.448391		-0.417983	0.378423		-0.112033	0.687457		-0.441479	0.163427		0.290577		26.976	26.965	26.673	26.9869	26.9202	27.1507	26.8142	26.7129	26.2767	26.9316	26.8142	26.976	26.5696	26.5898	26.574
EZR	Ezrin	P15311;E7EQR4	27.3385	28.1245	28.1704	28.0736	28.2989		0.786023	0.542246		0.831932	0.805424		0.735109	0.652017		0.960382	0.591599		0.0459092	0.978775		-0.0509141	0.972594		0.17436	0.91545		0.730443		26.8264	27.2803	27.9089	27.7895	28.3951	28.189	28.2399	29.027	27.2445	27.8564	28.7325	27.632	28.189	27.2803	29.4274
F11R	Junctional adhesion molecule A	B7Z5W1;Q9Y624;B7Z941	28.783	28.9837	28.7268	28.9879	29.0879		0.200646	0.617896		-0.0562566	0.919097		0.204893	0.672965		0.304932	0.565399		-0.256903	0.503011		0.00424703	0.997359		0.104286	0.851806		0.566377		28.7739	28.8887	28.6865	29.0375	29.1459	28.7676	28.6181	28.9512	28.611	28.9372	29.2308	28.7958	28.7989	29.4354	29.0296
F12	Coagulation factor XII;Coagulation factor XIIa heavy chain;Beta-factor XIIa part 1;Coagulation factor XIIa light chain	P00748	24.8382	24.33	25.2515	25.3628	25.2519		-0.508226	0.794254		0.413289	0.864496		0.524644	0.766969		0.413767	0.810676		0.921515	0.480778		1.03287	0.583458		0.921993	0.571699		0.636055		25.4551	25.2891	23.7703	24.1364	23.5749	25.2785	25.3778	24.8997	25.4769	25.1604	25.2021	25.726	25.4583	24.4329	25.8647
F13A1	Coagulation factor XIII A chain	P00488;F5H080	35.1728	35.2735	35.2867	35.4097	35.3745		0.100667	0.675575		0.113906	0.798897		0.236858	0.613618		0.201748	0.445236		0.0132383	0.95347		0.136191	0.672871		0.101081	0.549933		0.392026		35.0512	35.2265	35.2408	35.1641	35.3666	35.2897	35.2689	35.3828	35.2084	35.2724	35.4241	35.5325	35.3203	35.4303	35.3731
F2	Prothrombin;Activation peptide fragment 1;Activation peptide fragment 2;Thrombin light chain;Thrombin heavy chain	P00734;E9PIT3;C9JV37	28.0556	28.1306	28.1326	28.1923	28.1061		0.0749722	0.92395		0.077041	0.94866		0.136688	0.90068		0.0504856	0.940386		0.00206884	0.998073		0.0617154	0.960948		-0.0244865	0.967666		0.996021		27.7833	28.4746	27.9089	28.0453	27.9595	28.3869	27.9372	28.0453	28.4154	27.726	28.0864	28.7645	27.8623	28.1065	28.3494
F5	Coagulation factor V;Coagulation factor V heavy chain;Coagulation factor V light chain	P12259	31.9668	32.2123	32.1489	32.0771	32.0982		0.245494	0.606134		0.18213	0.834575		0.110333	0.833094		0.131449	0.736169		-0.063364	0.805705		-0.13516	0.687426		-0.114044	0.458089		0.691839		31.7888	32.2619	31.8497	32.2478	32.1842	32.2048	32.2535	31.9539	32.2393	32.13	31.8792	32.2222	32.1901	32.0151	32.0896
F8A1	Factor VIII intron 22 protein	P23610	26.0764	26.2656	26.6862	26.2827	26.664		0.189233	0.69023		0.609786	0.816311		0.20636	0.77352		0.587653	0.424023		0.420553	0.386274		0.017128	0.979443		0.39842	0.32565		0.30566		25.767	26.1469	26.3153	26.2821	26.1738	26.341	26.7518	26.9539	26.3528	26.512	25.965	26.3712	26.5638	26.8385	26.5898
FABP5	Fatty acid-binding protein, epidermal	Q01469	28.2791	27.8959	28.1032	28.2446	28.4279		-0.383191	0.547872		-0.175917	0.84379		-0.0344995	0.962492		0.148808	0.723179		0.207274	0.458773		0.348691	0.545734		0.531998	0.21803		0.320679		27.9977	28.2714	28.5682	27.9923	27.7195	27.976	28.1556	28.189	27.965	28.019	28.2714	28.4433	28.4976	28.3992	28.3869
FADD	FAS-associated death domain protein	Q13158	25.8907	23.9496	26.0374	25.5447	25.708		-1.94105	0.557383		0.146744	0.930171		-0.345994	0.711163		-0.182664	0.733575		2.08779	0.368295		1.59505	0.583821		1.75838	0.442219		0.281804		26.3031	25.6403	25.7286	23.5348	22.859	25.4551	26.5285	26.1507	25.433	25.918	25.2926	25.4234	25.5926	25.7569	25.7746
FAF1	FAS-associated factor 1	Q9UNN5;B3KT28;B1ANM7;F5GZD2;Q9UNN5-2;B4DEJ6	25.5305	25.0532	25.2991	25.2046	25.1678		-0.477317	0.628396		-0.231382	0.795473		-0.325899	0.704922		-0.362687	0.502143		0.245935	0.77598		0.151418	0.919621		0.11463	0.900208		0.733593		25.5869	25.3477	25.6568	25.6513	24.5105	24.9977	25.1214	25.5045	25.2714	24.8811	25.0813	25.6513	25.1833	25.3975	24.9225
FAH	Fumarylacetoacetase	P16930;Q53XA7	29.6231	29.608	29.8756	29.5732	29.5597		-0.0150757	0.964219		0.252518	0.818864		-0.0499522	0.915917		-0.0634257	0.808557		0.267594	0.445725		-0.0348765	0.951557		-0.04835	0.868467		0.51469		29.7405	29.509	29.6198	29.7818	29.5315	29.5109	29.9539	30.0084	29.6646	29.8415	29.4073	29.4707	29.7146	29.4957	29.4688
FAM107B	Protein FAM107B	Q9H098;Q9H098-2;C9J6N5;C9JQ40;C9JW51;C9J3Q3;C9JYP1;C9J6Y8;C9JP05	25.0002	24.6364	24.7882	24.4869	24.9386		-0.36381	0.674193		-0.211967	0.866711		-0.513275	0.676739		-0.0615966	0.942874		0.151843	0.723814		-0.149465	0.871697		0.302213	0.601058		0.638746		25.5696	24.6971	24.7338	24.4551	24.5869	24.867	25.0567	24.6376	24.6703	24.0608	24.7846	24.6153	25.2426	24.9977	24.5754
FAM114A2	Protein FAM114A2	Q9NRY5;E7ESJ7;E5RGF9	27.3105	26.913	27.4414	27.2406	27.1231		-0.397525	0.485649		0.130878	0.790028		-0.0698922	0.852351		-0.187427	0.564862		0.528402	0.221726		0.327632	0.551571		0.210098	0.530152		0.242887		27.4473	27.1604	27.3239	26.8504	27.1115	26.7771	27.4938	27.391	27.4394	27.4314	27.1015	27.189	26.9539	27.217	27.1984
FAM120A	Constitutive coactivator of PPAR-gamma-like protein 1	Q9NZB2;Q9NZB2-6;Q9NZB2-4	26.7102	26.6129	26.6338	26.717	26.7138		-0.0972773	0.71739		-0.0763766	0.889229		0.006766	0.982202		0.00359917	0.988202		0.0209007	0.950278		0.104043	0.576392		0.100876	0.638795		0.846921		26.8385	26.7518	26.5404	26.5898	26.5492	26.6998	26.4692	26.8142	26.6181	26.673	26.7389	26.7389	26.5754	26.8142	26.7518
FAM126A	Hyccin	Q9BYI3;B8ZZJ1;B8ZZA2;H7C0W7	25.9477	25.4899	25.6584	25.9236	26.144		-0.457802	0.47624		-0.289303	0.793746		-0.0240746	0.953216		0.196326	0.584768		0.168499	0.684074		0.433728	0.489256		0.654128	0.217992		0.240029		25.8264	25.9111	26.1055	25.5463	25.5225	25.4008	25.5983	25.9825	25.3943	25.7746	25.9089	26.0874	25.9271	26.2714	26.2335
FAM129A	Protein Niban	Q9BZQ8	26.5075	26.6281	26.7955	26.7149	26.7179		0.120598	0.774622		0.288026	0.817309		0.207369	0.698871		0.210433	0.596807		0.167427	0.504293		0.0867704	0.848412		0.0898348	0.758919		0.562115		26.2463	26.6865	26.5898	26.7895	26.604	26.4908	26.9089	26.7518	26.726	26.5682	26.726	26.8504	26.6595	26.632	26.8623
FAM136A	Protein FAM136A	E7EQY1;Q96C01;C9J2Y4	24.8682	24.9135	24.1096	24.7458	23.9591		0.0452741	0.973085		-0.758613	0.813759		-0.122412	0.950062		-0.909107	0.655167		-0.803887	0.564464		-0.167686	0.94442		-0.954381	0.67426		0.733629		24.867	24.5869	25.1508	24.654	24.317	25.7695	24.3844	24.6376	23.3069	25.1332	25.4394	23.6649	24.8288	24.6486	22.4
FAM160B1	Protein FAM160B1	Q5W0V3;Q5W0V3-2	27.8462	28.1137	28.1686	28.0056	28.0786		0.267508	0.550203		0.322438	0.760692		0.159457	0.659373		0.232417	0.534602		0.0549297	0.816999		-0.108051	0.666437		-0.0350914	0.893617		0.342527		27.6595	27.976	27.9031	28.1795	28.1747	27.9869	28.0762	28.1361	28.2935	28.0349	27.9316	28.0505	27.9539	28.2262	28.0557
FAM160B2	Protein FAM160B2	Q86V87;A6NNC3	24.8416	22.8637	24.0777	22.9219	23.1831		-1.97792	0.443831		-0.763969	0.843107		-1.91976	0.570037		-1.65849	0.424261		1.21395	0.559389		0.0581633	0.984752		0	0		0.395867		24.9803	24.9406	24.604	22.2405	23.6383	22.7123	25.1371	24.5463	22.5496	24.2244	22.4606	22.0806	24.0481	22.8677	22.6337
FAM175B	BRISC complex subunit Abro1	Q15018	26.4282	26.6103	26.0382	26.162	26.0144		0.182107	0.814477		-0.390052	0.678499		-0.266183	0.597859		-0.413848	0.440553		-0.572159	0.454163		-0.448291	0.654788		-0.595955	0.464213		0.347537		26.4629	26.3325	26.4892	27.189	26.3511	26.2909	25.9248	26.2335	25.9562	26.2714	26.0854	26.1293	26.2207	25.8312	25.9912
FAM177A1	Protein FAM177A1	G3V583;Q8N128;Q8N128-2	26.372	25.1143	25.017	26.1808	26.3169		-1.25774	0.744548		-1.35502	0.844163		-0.191201	0.682917		-0.0550874	0.908183		-0.097278	0.991168		1.06654	0.847506		1.20266	0.751625		0.816338		26.1681	26.433	26.515	26.3828	22.1705	26.7895	26.2856	26.4567	22.3087	26.2335	26.3049	26.0041	26.019	26.4877	26.4441
FAM195B	Protein FAM195B	I3L2L5;I3L4Q0;C9JLW8;I3L3A7;I3L317	23.1084	22.5561	23.9178	23.4713	23.7058		0	0		0.809399	0.845352		0	0		0.597487	0.647323		1.36161	0.177913		0	0		1.1497	0.410508		0.333182		23.0112	22.7147	23.5992	22.5078	22.5779	22.5828	24.317	23.5825	23.8537	23.1866	23.0077	24.2196	24.0359	22.8354	24.2463
FAM213B	Prostamide/prostaglandin F synthase	Q8TBF2;Q8TBF2-3;Q8TBF2-4;Q8TBF2-2;Q8TBF2-5;Q8TBF2-7;Q8TBF2-6	27.6832	27.5905	27.7337	27.4805	27.5967		-0.0927308	0.805706		0.0504882	0.961351		-0.202665	0.726779		-0.0864709	0.828722		0.143219	0.700673		-0.109934	0.814676		0.00625992	0.98603		0.75751		27.7958	27.8385	27.4154	27.6865	27.524	27.5609	27.673	28.019	27.509	27.3662	27.3494	27.726	27.604	27.4473	27.7389
FAM21A	WASH complex subunit FAM21B;WASH complex subunit FAM21A;WASH complex subunit FAM21C	F8W7U3;Q5SNT6;I3L0H6;Q641Q2;E7ESD2;I3L0C9;Q641Q2-2;F5H871;Q9Y4E1-3;F5H0J6;Q9Y4E1-2;Q9Y4E1;Q9Y4E1-4;Q5T1D7	26.3841	26.0161	26.3633	26.3819	26.2813		-0.368	0.4028		-0.0207748	0.968273		-0.00219218	0.993094		-0.102799	0.695726		0.347225	0.280697		0.365808	0.540208		0.265201	0.42931		0.303224		26.3562	26.4551	26.341	26.0914	25.9293	26.0275	26.3393	26.2207	26.53	26.217	26.5492	26.3795	26.0935	26.4282	26.3222
FAM3C	Protein FAM3C	Q92520	25.7892	25.55	24.7452	24.7324	24.1785		-0.239179	0.709106		-1.04397	0.843345		-1.0568	0.713421		-1.61068	0.582665		-0.804795	0.76105		-0.817623	0.797311		-1.3715	0.629275		0.768006		26.0041	25.5492	25.8142	25.2244	25.8764	25.5492	25.6891	22.6445	25.902	25.6403	23.0135	25.5433	23.512	26.3443	22.6792
FAM49B	Protein FAM49B	Q9NUQ9;E5RI16	27.6304	27.9353	27.822	27.7613	27.809		0.304946	0.555829		0.191629	0.825133		0.13092	0.771544		0.178684	0.623335		-0.113316	0.608858		-0.174026	0.537724		-0.126261	0.468808		0.511423		27.391	27.8203	27.6798	27.9372	27.9259	27.9428	27.8142	27.6595	27.9923	27.726	27.6663	27.8916	27.8081	27.6931	27.9259
FAM63A	Protein FAM63A	Q8N5J2;Q8N5J2-3;Q8N5J2-4;Q8N5J2-2	29.2237	29.5179	29.4504	29.6134	29.5959		0.294214	0.728885		0.226717	0.809179		0.389701	0.620008		0.372219	0.50374		-0.0674973	0.935376		0.0954863	0.926286		0.0780048	0.910365		0.661718		29.0111	29.5536	29.1065	29.027	29.5591	29.9677	29.4995	29.3869	29.4649	29.4174	29.5754	29.8474	29.5934	29.5573	29.6372
FAM63B	Protein FAM63B	Q8NBR6-2;Q8NBR6;H0YLR1	24.014	24.471	24.6715	23.8852	24.4347		0.456933	0.728052		0.657511	0.808489		-0.128862	0.969271		0.420675	0.731729		0.200579	0.388318		-0.585795	0.828472		-0.0362581	0.898843		0.767719		24.3376	24.6486	23.056	24.3778	24.6376	24.3975	24.7129	24.6865	24.6153	24.5105	22.4216	24.7234	24.4676	24.2961	24.5404
FAM65B	Protein FAM65B	Q9Y4F9;F5GX51	24.7503	23.2075	25.143	24.6281	23.9627		-1.5428	0.486514		0.392684	0.798074		-0.122269	0.841355		-0.787577	0.682138		1.93548	0.254994		1.42053	0.548888		0.755218	0.743434		0.332225		24.7077	25.0148	24.5285	22.3838	23.1654	24.0734	25.4583	25.1565	24.8142	24.3443	24.8858	24.654	24.3443	25.0567	22.4871
FAM65C	Protein FAM65C	F5H0X2;Q96MK2;Q96MK2-2	27.4429	27.5151	27.5948	27.6231	27.5253		0.07223	0.704643		0.151917	0.822791		0.180241	0.713126		0.0824045	0.711747		0.0796865	0.631366		0.108011	0.846875		0.0101744	0.971189		0.736635		27.3494	27.524	27.4551	27.509	27.4394	27.5969	27.5014	27.5898	27.6931	27.6527	27.3662	27.8504	27.4073	27.6595	27.509
FAM89B	Protein FAM89B	E9PB01;Q8N5H3;E9PL72;Q8N5H3-2	23.9574	23.8076	23.2232	23.6177	23.0932		-0.149832	0.906547		-0.734257	0.819569		-0.339766	0.748137		-0.864209	0.452705		-0.584425	0.508145		-0.189934	0.872791		-0.714378	0.435404		0.396462		24.5754	23.632	23.6649	23.5165	24.3778	23.5285	23.4041	22.7625	23.503	23.7594	23.7796	23.3141	23.3253	22.971	22.9834
FAM91A1	Protein FAM91A1	Q658Y4;E7ER68	26.26	26.0573	26.1148	26.2024	26.3184		-0.202673	0.546061		-0.145203	0.814318		-0.0575752	0.913355		0.0584755	0.708825		0.0574703	0.862745		0.145098	0.835979		0.261148	0.42337		0.613688		26.2535	26.3187	26.2077	26.2207	25.9111	26.0401	26.2408	26.1253	25.9781	25.9628	26.1234	26.521	26.2714	26.2589	26.425
FAM98A	Protein FAM98A	E9PH82;Q8NCA5-2;Q8NCA5	25.8564	24.0225	25.7809	25.3683	25.8049		-1.83393	0.592536		-0.0755444	0.851013		-0.488199	0.778191		-0.0516008	0.752406		1.75839	0.503255		1.34574	0.750986		1.78233	0.515594		0.477842		25.9157	25.8741	25.7796	22.3223	23.6969	26.0484	25.6348	25.7945	25.9134	24.254	25.8858	25.965	25.7024	25.8264	25.8858
FARSA	Phenylalanine--tRNA ligase alpha subunit	Q9Y285;B4E363	26.6756	26.5989	26.6761	26.6103	26.4524		-0.0766748	0.924266		0.000507355	0.999305		-0.0652167	0.926554		-0.223204	0.695802		0.0771821	0.912989		0.0114581	0.987409		-0.146529	0.780968		0.903744		26.8973	26.2909	26.8385	26.673	26.8504	26.2732	26.5754	26.4551	26.9977	26.5754	26.4661	26.7895	26.6998	26.3612	26.2961
FARSB	Phenylalanine--tRNA ligase beta subunit	Q9NSD9;F5H6Y1	28.0062	27.8204	28.04	28.0238	27.8966		-0.185792	0.704564		0.0338192	0.961159		0.0176125	0.973801		-0.109632	0.750507		0.219611	0.433431		0.203404	0.594017		0.0761592	0.785468		0.584982		28.1984	27.7389	28.0813	27.9484	27.604	27.9089	28.0296	28.0608	28.0296	27.9705	28.0608	28.0401	27.8445	27.8858	27.9595
FASN	Fatty acid synthase;[Acyl-carrier-protein] S-acetyltransferase;[Acyl-carrier-protein] S-malonyltransferase;3-oxoacyl-[acyl-carrier-protein] synthase;3-oxoacyl-[acyl-carrier-protein] reductase;3-hydroxyacyl-[acyl-carrier-protein] dehydratase;Enoyl-[acyl-carrier-protein] reductase;Oleoyl-[acyl-carrier-protein] hydrolase	P49327	31.199	31.2461	31.3141	31.3215	31.3192		0.0470695	0.826194		0.115049	0.813176		0.122508	0.724424		0.120223	0.589425		0.0679798	0.577233		0.0754382	0.842358		0.0731538	0.705505		0.706671		31.1544	31.325	31.1177	31.2422	31.1604	31.3357	31.3088	31.341	31.2924	31.196	31.2814	31.4871	31.2478	31.2814	31.4284
FBLN1	Fibulin-1	B1AHL2;P23142-4;F8W7M9;P23142-2;B1AHL4;P23142-3;P23142	22.6018	23.7345	23.7063	23.2407	23.7781		0	0		1.10448	0.763257		0.638883	0.665271		1.17631	0.593054		-0.0281785	0.977897		-0.493773	0.689646		0.0436522	0.988506		0.595236		23.1799	22.3902	22.2353	23.3693	24.0904	23.7437	23.2133	24.0105	23.895	23.8288	22.7473	23.146	23.654	25.2312	22.4491
FBXL8	F-box/LRR-repeat protein 8	Q96CD0	23.3452	23.6988	22.3988	23.191	23.5285		0.35366	0.824917		-0.94637	0.836502		-0.154186	0.919425		0.183337	0.500027		-1.30003	0.599293		-0.507846	0.86111		-0.170323	0.911024		0.697295		23.4041	23.3353	23.2961	23.8185	24.6717	22.6063	20.6402	22.9579	23.5983	22.245	23.5285	23.7995	23.4041	23.5165	23.6649
FBXO7	F-box only protein 7	Q9Y3I1;Q5TI86;Q9Y3I1-2	25.8974	25.4212	26.074	25.6709	25.7258		-0.47618	0.578203		0.176602	0.800616		-0.226557	0.613173		-0.171651	0.660659		0.652782	0.382931		0.249624	0.799786		0.304529	0.695121		0.384286		25.989	25.8504	25.8528	25.5463	24.918	25.7995	25.8694	26.1469	26.2058	25.5638	25.5983	25.8504	25.4953	26.0062	25.6757
FCER1G	High affinity immunoglobulin epsilon receptor subunit gamma	P30273	25.4549	26.6578	25.2456	24.812	24.1418		1.20282	0.716187		-0.209361	0.973734		-0.642994	0.898146		-1.31312	0.798162		-1.41218	0.517645		-1.84582	0.68774		-2.51594	0.564454		0.78559		26.2262	26.8142	23.3244	26.8264	27.4551	25.6918	26.7645	24.6782	24.2941	27.2625	22.7411	24.4322	22.4346	27.5165	22.4743
FCGR2A	Low affinity immunoglobulin gamma Fc region receptor II-a;Low affinity immunoglobulin gamma Fc region receptor II-c	P12318-2;P12318;F5GXY9;F5GX41;P31995	25.7053	24.9384	24.604	25.3994	26.1112		-0.766966	0.805712		-1.10135	0.822266		-0.305974	0.926544		0.405834	0.629803		-0.33438	0.9381		0.460992	0.93286		1.1728	0.698055		0.811831		25.4892	25.3679	26.2589	25.8166	22.6389	26.3595	25.3943	22.9438	25.4738	26.48	26.2625	23.4556	25.9517	26.4661	25.9157
FDPS	Farnesyl pyrophosphate synthase	E9PCI9;P14324	28.754	28.9281	29.0046	29.01	28.9319		0.174088	0.78732		0.250543	0.81701		0.256002	0.725167		0.177839	0.785511		0.0764548	0.847268		0.0819136	0.907359		0.00375048	0.994726		0.835452		28.4394	29.1065	28.7162	28.6424	29.0914	29.0505	29.0322	28.9677	29.0137	28.8741	28.9002	29.2557	28.8973	28.6492	29.249
FER	Tyrosine-protein kinase Fer	P16591;P16591-2;P16591-3	25.3838	24.8074	25.5023	25.3978	25.2134		-0.57638	0.523935		0.118523	0.911553		0.013986	0.987852		-0.170423	0.733146		0.694903	0.297861		0.590366	0.554809		0.405957	0.411393		0.371562		25.6153	25.5045	25.0317	24.945	24.5638	24.9134	25.1449	25.6676	25.6944	24.9803	25.4923	25.7208	25.3679	25.228	25.0443
FERMT2	Fermitin family homolog 2	H0YJ34;Q96AC1-2;Q96AC1;Q96AC1-3	25.2972	24.2722	23.583	24.4356	24.3028		-1.02499	0.551814		-1.71424	0.82648		-0.861591	0.610777		-0.994377	0.479453		-0.689249	0.719278		0.163398	0.855752		0.0306123	0.977319		0.447684		25.1527	24.7543	25.9847	24.1565	24.7286	23.9316	22.468	25.0443	23.2367	24.4105	24.4923	24.4041	24.6649	24.3578	23.8858
FERMT3	Fermitin family homolog 3	Q86UX7-2;Q86UX7;F5H1C6	35.8164	35.8935	35.8637	35.9646	35.8733		0.0770938	0.721393		0.0472819	0.888807		0.148111	0.712499		0.0568899	0.859168		-0.0298119	0.822063		0.0710169	0.855621		-0.0202039	0.951871		0.847002		35.6892	35.9439	35.8162	35.8838	35.8399	35.957	35.9374	35.8328	35.821	35.8352	35.9019	36.1566	35.9613	35.6549	36.0038
FES	Tyrosine-protein kinase Fes/Fps	P07332;P07332-4;P07332-3;E7ENM8;P07332-2;E9PIJ7	26.0222	25.8639	25.8909	25.7718	25.9025		-0.158309	0.79906		-0.131333	0.853394		-0.250395	0.659702		-0.119734	0.828795		0.0269756	0.970038		-0.0920868	0.908814		0.0385749	0.961454		0.89099		25.7771	26.1623	26.1273	25.9977	25.4707	26.1234	25.9803	25.7077	25.9847	25.6096	25.772	25.9338	25.8191	26.2481	25.6403
FGA	Fibrinogen alpha chain;Fibrinopeptide A;Fibrinogen alpha chain	P02671;P02671-2	34.7479	35.0004	34.5877	34.7406	34.6617		0.252536	0.665365		-0.160227	0.834005		-0.007267	0.989384		-0.0862274	0.834022		-0.412763	0.313668		-0.259803	0.666622		-0.338763	0.436494		0.475799		34.4883	34.7454	35.01	34.78	35.2408	34.9806	34.6198	34.5179	34.6253	34.5412	34.9505	34.7302	34.7252	34.5296	34.7302
FGB	Fibrinogen beta chain;Fibrinopeptide B;Fibrinogen beta chain	P02675;B4E1D3;D6REL8	35.2717	35.5101	35.2637	35.4354	35.4976		0.238397	0.664984		-0.00798289	0.991449		0.163752	0.74132		0.225928	0.565607		-0.24638	0.511668		-0.0746447	0.898854		-0.012469	0.978591		0.595184		35.0389	35.2759	35.5002	35.2549	35.7226	35.5527	35.3236	35.1107	35.3568	35.2654	35.4853	35.5556	35.4611	35.4146	35.6171
FGD3	FYVE, RhoGEF and PH domain-containing protein 3	Q5JSP0;F8W7P2;Q5JSP0-2	27.6282	27.6226	27.5043	27.3848	27.5767		-0.00557645	0.989391		-0.12384	0.864127		-0.243343	0.614947		-0.0514755	0.885361		-0.118264	0.731165		-0.237767	0.55055		-0.0458991	0.868202		0.623723		27.6389	27.4314	27.8142	27.5826	27.5463	27.7389	27.2803	27.4938	27.7389	27.3494	27.3578	27.4473	27.6865	27.6527	27.391
FGD4	FYVE, RhoGEF and PH domain-containing protein 4	B7Z493;E9PJX4;F8VWL3;Q96M96;F8W1R0;G3XA97	26.911	26.588	26.9652	26.8329	27.0389		-0.323051	0.614801		0.0541611	0.876506		-0.0781918	0.789559		0.127817	0.599085		0.377212	0.487142		0.244859	0.760687		0.450868	0.463417		0.448756		26.8142	26.9539	26.965	26.8623	26.1757	26.726	27.0084	26.8264	27.0608	26.8741	26.6595	26.965	27.17	27.0608	26.8858
FGFR1OP2	FGFR1 oncogene partner 2	Q9NVK5-2;Q9NVK5	28.3982	28.3254	28.578	28.5116	28.4837		-0.0728537	0.852032		0.179782	0.800062		0.113405	0.783027		0.0854632	0.676875		0.252636	0.538192		0.186259	0.780352		0.158317	0.672169		0.694918		28.341	28.5128	28.341	28.2308	28.1556	28.5898	28.6798	28.3578	28.6964	28.6998	28.267	28.5682	28.4433	28.6004	28.4073
FGG	Fibrinogen gamma chain	P02679-2;P02679;C9JEU5;C9JC84	35.0489	35.3731	35.2229	35.3124	35.2946		0.324196	0.590763		0.173957	0.800678		0.263509	0.619937		0.245658	0.558902		-0.150239	0.659327		-0.0606867	0.915553		-0.0785383	0.856528		0.527988		34.8608	35.01	35.2759	35.1415	35.6442	35.3336	35.2229	35.2157	35.2301	35.2689	35.2443	35.4241	35.1377	35.3033	35.4427
FH	Fumarate hydratase, mitochondrial	P07954-2;P07954	26.8907	27.3631	26.9069	27.0556	27.3959		0.472425	0.527925		0.0162067	0.983727		0.164937	0.735963		0.505239	0.447452		-0.456219	0.221808		-0.307489	0.54077		0.032814	0.921432		0.206405		26.9089	26.632	27.1312	27.4314	27.4785	27.1795	26.8142	26.9977	26.9089	27.1115	26.9539	27.1015	27.217	27.5315	27.4394
FHL1	Four and a half LIM domains protein 1	Q13642-1;F5GWR5;Q13642-5;Q13642-4;Q5JXI8;B7Z5V0;B7Z6U8;Q13642;Q5JXH8;Q5JXH7;Q5JXI3;Q13642-3;Q5JXH9;Q5JXI2;Q5JXI0	32.0602	31.9755	31.8571	32.2099	32.1396		-0.0846755	0.78802		-0.203098	0.83465		0.149708	0.706232		0.0794411	0.775622		-0.118422	0.541118		0.234383	0.578722		0.164117	0.551741		0.312021		32.1544	31.8901	32.1361	31.9046	32.1392	31.8829	31.8645	31.8571	31.8497	32.1021	32.3672	32.1604	31.995	32.225	32.1989
FHL2	Four and a half LIM domains protein 2	Q14192	26.0858	26.6388	26.4424	26.2813	26.3479		0.553001	0.551077		0.356551	0.71688		0.19549	0.650723		0.262044	0.711025		-0.19645	0.806457		-0.357512	0.732024		-0.290957	0.770232		0.645359		26.1135	26.0526	26.0914	26.441	27.2077	26.2678	26.3645	26.6595	26.3031	26.1115	26.5045	26.228	25.9089	26.2607	26.8741
FHL3	Four and a half LIM domains protein 3	Q13643	24.8459	25.7754	25.8453	25.9578	25.9299		0.929517	0.494217		0.999404	0.315584		1.11194	0.410824		1.08402	0.387071		0.0698865	0.872384		0.182423	0.706649		0.154506	0.789782		0.0687392		24.7338	24.895	24.9089	25.5433	25.9111	25.8717	25.7569	26.0401	25.7389	26.0443	26.0547	25.7746	25.6096	26.3084	25.8717
FHOD1	FH1/FH2 domain-containing protein 1	Q9Y613;B4DVN5	31.2183	31.3119	31.3153	31.5108	31.4529		0.0935993	0.790699		0.0969804	0.84866		0.292449	0.612982		0.234549	0.515987		0.00338109	0.991829		0.198849	0.599513		0.140949	0.478181		0.387651		31.1177	31.4384	31.099	31.225	31.2478	31.4629	31.3515	31.341	31.2535	31.4234	31.4334	31.6756	31.4871	31.4532	31.4184
FIBP	Acidic fibroblast growth factor intracellular-binding protein	O43427-2;O43427;H0YCE7;E9PSD3	26.1501	24.0878	26.2061	26.3458	26.5284		-2.06223	0.544472		0.0560335	0.984059		0.195759	0.764587		0.378383	0.552346		2.11826	0.456398		2.25798	0.56738		2.44061	0.437732		0.314326		26.4754	26.1927	25.7821	22.6756	23.4645	26.1234	25.3645	26.9316	26.3222	26.4441	26.2372	26.3562	26.673	26.5478	26.3645
FIS1	Mitochondrial fission 1 protein	Q9Y3D6	25.1806	25.0443	25.4841	25.1604	25.2349		-0.136285	0.852931		0.303529	0.845503		-0.0202535	0.982106		0.0543187	0.940293		0.439814	0.487469		0.116032	0.895346		0.190604	0.669875		0.759804		25.4234	25.4266	24.6918	24.8576	24.9933	25.2821	25.0772	25.8647	25.5105	25.5045	24.7895	25.1871	24.9933	25.3205	25.391
FKBP15	FK506-binding protein 15	Q5T1M5;Q5T1M5-2	26.4685	26.6313	26.5564	26.77	26.7479		0.162797	0.547925		0.0879116	0.82955		0.301528	0.615835		0.279382	0.516314		-0.0748857	0.659696		0.138731	0.802048		0.116585	0.731452		0.509715		26.4723	26.5754	26.3578	26.632	26.726	26.5359	26.5696	26.632	26.4676	26.5898	26.6595	27.0608	26.5075	26.8858	26.8504
FKBP1A	Peptidyl-prolyl cis-trans isomerase FKBP1A;Peptidyl-prolyl cis-trans isomerase	P62942;Q1JUQ5;Q5W0X3;A8MSS1;Q5VVH2	29.2454	29.5299	29.3011	29.2861	29.1583		0.28442	0.752903		0.0556927	0.973516		0.0406825	0.98172		-0.0871188	0.929585		-0.228727	0.396011		-0.243738	0.83348		-0.371539	0.466715		0.890666		28.6595	29.8415	29.2354	29.3745	29.6093	29.6058	29.2193	29.4374	29.2467	29.6268	28.6798	29.5518	29.3109	28.8294	29.3346
FKBP2	Peptidyl-prolyl cis-trans isomerase FKBP2;Peptidyl-prolyl cis-trans isomerase	P26885;F5H0N4	29.0817	29.3094	29.2318	29.3776	29.5577		0.22772	0.539747		0.150075	0.789587		0.295897	0.58556		0.476037	0.426418		-0.0776456	0.806479		0.0681763	0.871523		0.248316	0.459949		0.268896		29.0401	29.1913	29.0137	29.4073	29.3848	29.1361	29.3807	29.0839	29.2308	29.2935	29.3153	29.524	29.604	29.3828	29.6865
FKBP3	Peptidyl-prolyl cis-trans isomerase FKBP3	Q00688	28.1097	28.3506	28.1762	27.8464	28.0449		0.240932	0.700736		0.06648	0.943362		-0.263226	0.657039		-0.0647411	0.870134		-0.174452	0.72006		-0.504159	0.541013		-0.305674	0.459629		0.430622		28.1015	27.8324	28.3951	28.2354	28.6561	28.1604	27.9977	28.0914	28.4394	27.7389	27.9089	27.8916	28.0914	28.019	28.0243
FKBP4	Peptidyl-prolyl cis-trans isomerase FKBP4;Peptidyl-prolyl cis-trans isomerase FKBP4, N-terminally processed	Q02790	24.9657	25.4175	24.7278	24.6842	23.9892		0.451799	0.632431		-0.237886	0.854918		-0.281551	0.731272		-0.976516	0.554253		-0.689685	0.359128		-0.733349	0.545498		-1.42831	0.425099		0.33525		25.4073	24.9495	24.5404	25.5492	25.0062	25.6971	24.918	24.8811	24.3844	24.7895	24.6703	24.5926	25.0359	23.3097	23.622
FKBP5	Peptidyl-prolyl cis-trans isomerase FKBP5;Peptidyl-prolyl cis-trans isomerase FKBP5, N-terminally processed	B7Z8G2;Q13451;B7Z7Z8	26.3622	26.0761	26.1343	26.0177	26.1952		-0.286118	0.620099		-0.22798	0.678877		-0.344549	0.706079		-0.166998	0.522907		0.0581373	0.92355		-0.058431	0.937699		0.11912	0.821747		0.53035		26.3256	26.4441	26.317	26.3307	25.6918	26.2058	26.1527	26.2058	26.0443	26.1115	26.0793	25.8623	26.2944	26.2408	26.0505
FLAD1	FAD synthase;Molybdenum cofactor biosynthesis protein-like region;FAD synthase region	Q8NFF5-3;Q8NFF5-2;Q8NFF5;Q5T196	24.3057	24.0557	24.6666	24.2839	24.3644		-0.249999	0.708461		0.360856	0.837603		-0.0217775	0.974604		0.0587165	0.872581		0.610855	0.325151		0.228221	0.76763		0.308715	0.547493		0.348085		24.3443	24.0443	24.5285	24.4425	23.867	23.8576	24.8336	24.6376	24.5285	24.3239	24.0854	24.4425	24.3712	24.4614	24.2607
FLII	Protein flightless-1 homolog	Q13045;F5H407	31.2125	31.0305	31.2937	31.2556	31.1915		-0.182062	0.574807		0.0811831	0.853248		0.0430533	0.87759		-0.0209897	0.926896		0.263245	0.295493		0.225115	0.532284		0.161072	0.422179		0.347649		31.3776	31.1422	31.1177	31.0673	30.9188	31.1053	31.2535	31.4083	31.2193	31.225	31.1901	31.3515	31.1544	31.2478	31.1724
FLNA	Filamin-A	P21333-2;P21333;Q5HY54	36.8911	37.0028	36.9792	37.0792	37.067		0.111628	0.664226		0.0880241	0.83132		0.188087	0.600455		0.175865	0.458612		-0.0236041	0.928279		0.0764592	0.790992		0.064237	0.721507		0.459075		36.78	36.9086	36.9848	36.9308	37.1358	36.9417	37.0773	36.886	36.9742	37.0572	37.0163	37.1641	37.0872	37.0266	37.0872
FLNB	Filamin-B	O75369-6;O75369-3;O75369-2;O75369-9;O75369;O75369-8	28.2506	26.7566	28.1543	25.111	25.134		-1.49393	0.815924		-0.0962327	0.983301		-3.1396	0.651798		-3.11661	0.525683		1.3977	0.843634		-1.64567	0.880693		-1.62268	0.824762		0.695691		28.3066	28.0914	28.3536	21.9105	29.3325	29.027	29.3578	26.2607	28.8445	28.8712	23.6358	22.8259	28.3787	23.4048	23.6184
FLOT1	Flotillin-1	O75955;B4DVY7;B0V109;A2AB10;F8VSI6;A2AB12	27.717	28.0918	27.8626	27.9401	27.9739		0.37475	0.551669		0.145599	0.846089		0.223125	0.662038		0.256919	0.505199		-0.229151	0.594697		-0.151625	0.803252		-0.11783	0.75089		0.521645		27.509	27.9031	27.7389	27.9031	28.3745	27.9977	27.8504	27.6663	28.0711	27.9595	27.7645	28.0965	27.976	28.003	27.9428
FLOT2	Flotillin-2	E7EMK3;Q14254	25.4429	24.8047	25.7707	25.742	26.0505		-0.638225	0.737177		0.327794	0.801455		0.29915	0.641081		0.607589	0.448103		0.966019	0.563804		0.937375	0.68714		1.24581	0.488645		0.476924		25.6209	25.5983	25.1095	23.4128	25.705	25.2961	25.6209	25.6595	26.0317	25.6622	25.7645	25.7995	25.8647	26.2891	25.9977
FN1	Fibronectin;Anastellin;Ugl-Y1;Ugl-Y2;Ugl-Y3	E7ERA1;P02751-6;E9PE77;P02751-3;P02751-11;P02751;P02751-7;P02751-15;P02751-12;P02751-10;P02751-5;P02751-9;P02751-14;P02751-13;P02751-8;F8W7G7;P02751-4;E9PG29	30.0489	30.1715	29.9521	30.0768	30.0817		0.122578	0.690522		-0.0968049	0.865366		0.0279452	0.960438		0.0328217	0.942783		-0.219383	0.358715		-0.0946331	0.832999		-0.0897566	0.821849		0.818667		29.9117	30.2535	29.9814	30.1239	30.1483	30.2422	29.995	29.8004	30.0608	29.9539	29.9677	30.3088	30.1483	29.788	30.3088
FN3K	Fructosamine-3-kinase	Q9H479;B3KNR9;B4DH12	29.2634	29.5924	29.5694	29.5722	29.3559		0.329018	0.856444		0.306	0.917712		0.308791	0.876932		0.0925198	0.962219		-0.0230172	0.942316		-0.0202262	0.963601		-0.236498	0.430587		0.944848		30.362	28.0453	29.3828	29.461	29.6181	29.6981	29.5591	29.7096	29.4394	29.7469	29.4214	29.5481	29.3766	29.4649	29.2262
FN3KRP	Ketosamine-3-kinase	Q9HA64;F5H4E4	25.9409	26.0614	26.3216	26.0267	26.125		0.12049	0.888002		0.380634	0.81683		0.0857887	0.934835		0.184075	0.7351		0.260144	0.649871		-0.0347017	0.97937		0.0635846	0.921161		0.803705		26.2571	25.5898	25.976	25.7871	25.8717	26.5255	26.17	26.3762	26.4186	26.1449	25.5492	26.3861	26.0813	26.3222	25.9716
FNBP1L	Formin-binding protein 1-like	Q5T0N5-3;Q5T0N5-4;Q5T0N5-2;Q5T0N5-5;Q5T0N5	25.2725	25.319	25.5736	25.1791	25.1955		0.0465444	0.837498		0.301128	0.810485		-0.0934016	0.850056		-0.0769984	0.916187		0.254583	0.508058		-0.139946	0.815126		-0.123543	0.866582		0.687934		25.391	25.2244	25.2021	25.2096	25.4202	25.3273	25.8336	25.3205	25.5667	25.1488	24.9271	25.4614	25.4831	24.6264	25.4769
FNIP2	Folliculin-interacting protein 2	Q9P278;Q9P278-2;D6RFH5	26.8482	24.0238	26.9738	27.247	25.6128		-2.8243	0.553691		0.125668	0.852942		0.398799	0.656401		-1.23533	0.730881		2.94997	0.422148		3.2231	0.556684		1.58898	0.76012		0.453368		26.5624	26.9316	27.0505	23.0851	26.8264	22.16	26.8973	27.0813	26.9428	26.8623	27.2535	27.6251	22.7703	27.0813	26.9869
FNTA	Protein farnesyltransferase/geranylgeranyltransferase type-1 subunit alpha	P49354;E9PQP6;P49354-2	26.9557	26.6711	26.9399	26.8337	26.8739		-0.284603	0.530956		-0.0158138	0.982686		-0.121962	0.849101		-0.0817629	0.837928		0.268789	0.430114		0.162641	0.828644		0.20284	0.565006		0.733837		26.976	27.1015	26.7895	26.6181	26.7771	26.6181	26.7389	27.1604	26.9202	26.4457	26.9539	27.1015	26.9428	26.6181	27.0608
FNTB	Protein farnesyltransferase subunit beta	B4DL54;H0YHI0;B4E1A0;P49356;B3KSC2	25.7494	25.6797	25.8293	25.3161	25.7302		-0.0696557	0.9531		0.0798702	0.970966		-0.433308	0.736519		-0.0192299	0.985781		0.149526	0.789611		-0.363652	0.595383		0.0504258	0.946462		0.765017		26.3595	25.1293	25.7594	25.6486	25.767	25.6237	25.4394	25.867	26.1814	24.976	25.6622	25.3101	25.2354	26.1507	25.8044
FOCAD	Focadhesin	Q5VW36	25.5604	24.4971	25.8045	25.511	25.5785		-1.06328	0.611896		0.244099	0.816458		-0.0493603	0.959708		0.0181605	0.970443		1.30738	0.453868		1.01392	0.672679		1.08144	0.537542		0.437434		25.8481	25.452	25.3811	25.1719	23.1286	25.1908	25.989	25.8433	25.5812	25.1527	25.9316	25.4488	25.6153	25.7492	25.3712
FRMD4B	FERM domain-containing protein 4B	E9PGA7;F5H6F3;Q9Y2L6-2;Q9Y2L6	27.7366	27.8319	27.6037	27.7318	27.6668		0.0952892	0.686284		-0.132899	0.828875		-0.00479952	0.989202		-0.0698058	0.898771		-0.228188	0.452232		-0.100089	0.81458		-0.165095	0.763038		0.83674		27.6931	27.8504	27.6663	27.8682	27.7129	27.9146	27.673	27.3992	27.7389	27.6998	27.5754	27.9202	27.7895	27.2625	27.9484
FRY	Protein furry homolog	Q5TBA9	22.8668	23.2945	22.8714	23.1665	22.5195		0.427757	0.834137		0.00462341	0.995849		0.299737	0.778678		-0.347289	0.512493		-0.423134	0.833953		-0.128021	0.969466		-0.775046	0.687339		0.784275		22.5581	23.1178	22.9244	24.1847	21.7965	23.9024	22.8559	22.9085	22.8497	23.6608	23.232	22.6067	22.5763	22.4591	22.5231
FRYL	Protein furry homolog-like	F5GX82;O94915;F2Z2S2	27.6702	27.1643	27.4769	27.1086	27.149		-0.505952	0.529661		-0.193319	0.843128		-0.561595	0.574401		-0.521264	0.473467		0.312632	0.506908		-0.0556437	0.921076		-0.0153122	0.982897		0.325874		27.6389	27.9089	27.4629	26.9089	27.3578	27.2262	27.4629	27.7325	27.2354	27.1795	27.2262	26.9202	26.8973	27.4785	27.0711
FSCN1	Fascin	Q16658	22.9301	25.4161	24.73	24.3331	25.038		2.48598	0.408394		1.79989	0.818624		1.40303	0.611916		2.10788	0.419298		-0.68609	0.725282		-1.08296	0.619147		-0.378101	0.730313		0.325725		22.2976	23.6844	22.8083	25.5285	25.4953	25.2244	23.0983	25.4707	25.6209	23.1632	25.2678	24.5682	24.2048	25.4953	25.4138
FSTL1	Follistatin-related protein 1	Q12841;B4DTT5;B4DTZ8	27.1017	27.1066	26.5581	26.2925	26.4462		0.00497246	0.997819		-0.543548	0.826585		-0.809137	0.658548		-0.655444	0.621997		-0.54852	0.487414		-0.814109	0.555819		-0.660417	0.476751		0.524888		26.4378	27.9814	26.8858	27.0914	27.5826	26.6458	26.8264	26.2299	26.6181	26.7645	25.945	26.1681	26.9316	26.1681	26.239
FTH1	Ferritin heavy chain;Ferritin heavy chain, N-terminally processed;Ferritin	P02794;E9PRK8;E9PKY7;G3V192;E9PPQ4;G3V1D1	24.5436	24.0668	23.5567	23.5518	22.9514		-0.476805	0.487785		-0.986931	0.798801		-0.991805	0.850237		-1.59219	0.405126		-0.510125	0.765026		-0.515	0.541013		-1.11539	0.38383		0.367485		24.604	24.3511	24.6757	24.2463	24.1253	23.8288	22.2069	24.0526	24.4105	23.3511	23.4298	23.8745	23.5231	22.3247	23.0065
FUCA1	Tissue alpha-L-fucosidase	P04066	23.1575	23.867	23.467	22.5947	22.9681		0.709455	0.667078		0.30949	0.853421		-0.562847	0.658967		-0.189475	0.8335		-0.399965	0.730327		-1.2723	0.537572		-0.89893	0.466974		0.348012		22.9293	22.7053	23.838	23.0617	24.6535	23.8858	23.2678	23.3239	23.8093	22.817	22.4346	22.5324	22.7576	23.0084	23.1382
FUT8	Alpha-(1,6)-fucosyltransferase	Q9BYC5;G3XAD2;Q9BYC5-2;G3V5N0	24.6765	25.2006	25.1754	24.1712	25.0354		0.524106	0.891284		0.498952	0.936983		-0.505318	0.911696		0.358889	0.917248		-0.0251541	0.975813		-1.02942	0.632114		-0.165216	0.622839		0.879691		22.0855	25.417	26.527	25.3578	24.9584	25.2856	25.6264	24.7746	25.1253	24.8904	22.942	24.6811	25.1371	24.9628	25.0062
FXR1	Fragile X mental retardation syndrome-related protein 1	B4DXZ6;P51114;E9PFF5;P51114-3;P51114-2;E7EU85	24.6978	24.1948	24.6425	24.2985	24.8872		-0.502998	0.752219		-0.0552692	0.971532		-0.399267	0.782974		0.189378	0.807736		0.447729	0.755416		0.103732	0.969817		0.692376	0.648288		0.782713		24.9584	24.217	24.918	24.6757	23.075	24.8336	24.6811	24.3376	24.9089	23.4354	24.6264	24.8336	25.239	24.8528	24.5696
FYB	FYN-binding protein	O15117-2;B4DLN2;O15117;F5H8I8	31.1552	31.3209	31.229	31.1689	31.3261		0.16573	0.714559		0.0738195	0.937411		0.0137571	0.981926		0.170938	0.708149		-0.09191	0.755284		-0.151972	0.539271		0.00520897	0.985423		0.784337		31.1053	31.4629	30.8973	31.3357	31.2703	31.3568	31.4083	31.0084	31.2703	31.13	31.1177	31.2591	31.4532	31.1842	31.341
FYCO1	FYVE and coiled-coil domain-containing protein 1	Q9BQS8;B7ZKT7	26.2293	26.0021	26.3785	26.359	26.1681		-0.227195	0.650649		0.149218	0.843291		0.129651	0.793962		-0.0611877	0.894861		0.376413	0.241442		0.356846	0.534017		0.166007	0.648196		0.447355		26.3778	25.9406	26.3695	25.9089	25.918	26.1795	26.452	26.3342	26.3494	26.17	26.4024	26.5045	25.9517	26.2408	26.3118
FYN	Non-specific protein-tyrosine kinase;Tyrosine-protein kinase Fyn	Q5R3A8;B3KPS6;P06241-2;P06241-3;P06241	25.8391	24.4188	25.8165	25.7694	26.2365		-1.42028	0.661696		-0.0225652	0.985644		-0.0696691	0.869264		0.397449	0.55087		1.39771	0.595911		1.35061	0.708856		1.81773	0.525403		0.512565		25.6622	26.0359	25.8191	25.5551	22.1999	25.5014	25.965	26.1814	25.3031	25.7619	25.9338	25.6125	25.9562	26.632	26.1214
G3BP1	Ras GTPase-activating protein-binding protein 1	Q13283;F5H4D6	26.6826	26.4012	26.8262	26.6482	26.8896		-0.281371	0.612545		0.143618	0.817802		-0.0344505	0.938358		0.206998	0.594854		0.424989	0.375083		0.24692	0.686429		0.488368	0.437958		0.379216		26.533	26.8019	26.7129	26.7129	26.1738	26.317	26.8741	26.9316	26.673	26.4723	26.8264	26.6458	26.6458	27.0914	26.9316
G3BP2	Ras GTPase-activating protein-binding protein 2	Q9UN86-2;Q9UN86	25.0624	23.5328	24.4464	25.1777	24.5123		-1.52953	0.549932		-0.615915	0.875855		0.11535	0.856093		-0.55002	0.833595		0.913612	0.749598		1.64488	0.554001		0.979507	0.760765		0.710681		25.2996	25.2499	24.6376	22.6649	22.962	24.9716	25.2354	22.5905	25.5135	25.1332	25.2785	25.1214	25.391	22.4811	25.6649
G6B	Protein G6b	B0UXC5;O95866-2;O95866-4;O95866-7;B7ZLJ5;O95866-6	29.4685	29.4478	29.6737	29.6898	29.816		-0.0206903	0.983383		0.205238	0.88826		0.221272	0.820626		0.347498	0.679368		0.225928	0.435702		0.241962	0.451152		0.368188	0.156822		0.681013		28.9787	30.1115	29.3153	29.4073	29.5146	29.4214	29.5052	29.6389	29.877	29.6814	29.7047	29.6831	29.8035	29.8959	29.7486
G6PD	Glucose-6-phosphate 1-dehydrogenase	P11413;P11413-2;P11413-3;E9PD92	31.9024	31.9161	31.9705	32.0932	32.1431		0.0137386	0.974443		0.0681508	0.907049		0.190782	0.714122		0.24066	0.595451		0.0544122	0.816796		0.177043	0.660165		0.226922	0.51864		0.613883		31.8195	32.1544	31.7333	32.0348	31.7771	31.9365	32.0705	31.9294	31.9117	32.0896	31.9365	32.2535	32.2647	31.9081	32.2563
GABARAPL2	Gamma-aminobutyric acid receptor-associated protein-like 2	H3BSM5;P60520;H3BQ50	23.4596	24.0009	22.425	22.7458	25.1268		0.541272	0.867972		-1.03463	0.8447		-0.71386	0.816479		1.66717	0.564036		0	0		0	0		1.1259	0.476084		0.320123		25.0813	23.7732	21.5244	25.1954	23.2931	23.5143	22.7208	21.7505	22.8037	23.1835	22.7546	22.2993	24.8528	25.1833	25.3443
GAK	Cyclin-G-associated kinase	O14976;E9PGR2	27.3449	27.1217	27.4122	27.2189	27.3647		-0.223266	0.688515		0.0672696	0.930263		-0.125975	0.80106		0.0197709	0.969048		0.290536	0.321768		0.0972913	0.795388		0.243037	0.460022		0.561488		27.6798	27.2535	27.1015	27.2714	26.9428	27.1507	27.4394	27.4394	27.3578	27.217	27.1507	27.2891	27.2077	27.4629	27.4234
GALK1	Galactokinase	P51570;A6NJD0	27.6398	27.4386	27.5257	27.2719	27.2624		-0.201159	0.665002		-0.114094	0.819993		-0.367909	0.646475		-0.377419	0.431155		0.0870641	0.839694		-0.166751	0.796252		-0.17626	0.658989		0.306439		27.7195	27.6389	27.5609	27.7129	27.4234	27.1795	27.5898	27.5165	27.4707	27.17	27.1984	27.4473	27.2535	27.2445	27.2891
GALK2	N-acetylgalactosamine kinase	B7ZAX5;Q01415-2;Q01415	26.309	26.3182	26.5991	26.4472	26.5122		0.00915845	0.987212		0.290123	0.824552		0.138151	0.615764		0.203154	0.553037		0.280965	0.682356		0.128992	0.848193		0.193996	0.708297		0.738827		26.275	26.3612	26.2909	26.2678	26.632	26.0547	26.8741	26.1214	26.8019	26.3528	26.441	26.5478	26.2979	26.6865	26.5522
GALM	Aldose 1-epimerase	Q96C23;B8ZZ75;H7C1B5	25.9808	25.7236	25.6254	25.7202	25.8295		-0.257196	0.842299		-0.355404	0.852567		-0.260593	0.829479		-0.151353	0.869323		-0.0982081	0.923404		-0.00339699	0.999641		0.105843	0.887343		0.917544		25.2926	26.0317	26.6181	25.6209	25.275	26.275	25.797	25.2996	25.7796	25.8093	25.4041	25.9473	25.8576	25.8044	25.8264
GALNT2	Polypeptide N-acetylgalactosaminyltransferase;Polypeptide N-acetylgalactosaminyltransferase 2;Polypeptide N-acetylgalactosaminyltransferase 2 soluble form	G3V1S6;Q10471;F5GYB2	25.2371	25.2918	25.4986	25.1494	25.406		0.0546595	0.944576		0.261452	0.847472		-0.087691	0.943126		0.168849	0.743906		0.206793	0.745647		-0.142351	0.904487		0.11419	0.784108		0.84729		25.0975	25.6292	24.9847	25.4138	25.4769	24.9847	25.9111	25.3975	25.1871	25.5812	24.6209	25.2463	25.3101	25.3645	25.5433
GALT	Galactose-1-phosphate uridylyltransferase	P07902;G3V4G9;G3V3U5;G3V223;F2Z2X9	25.6023	25.3348	25.3439	25.66	25.5271		-0.267507	0.673001		-0.258346	0.78371		0.0577183	0.850432		-0.0751368	0.740522		0.009161	0.991872		0.325225	0.669251		0.19237	0.730398		0.50792		25.726	25.632	25.4488	25.6622	25.4105	24.9316	25.2821	25.4362	25.3135	25.632	25.7871	25.5609	25.6096	25.5135	25.4583
GAMT	Guanidinoacetate N-methyltransferase	Q14353;Q14353-2	26.4334	26.3548	26.4993	26.4136	26.2808		-0.0785885	0.721749		0.065904	0.863407		-0.0197919	0.980287		-0.152604	0.552144		0.144492	0.507022		0.0587966	0.93242		-0.0740153	0.746257		0.777045		26.3256	26.452	26.5225	26.2463	26.4536	26.3645	26.5419	26.3662	26.5898	26.4567	26.0711	26.7129	26.3118	26.1527	26.3778
GANAB	Neutral alpha-glucosidase AB	Q14697;F5H6X6	31.8426	31.9509	31.9661	31.9076	31.9483		0.108268	0.620997		0.123532	0.823031		0.0649872	0.779187		0.105686	0.564411		0.0152639	0.929257		-0.0432809	0.872069		-0.00258191	0.990385		0.622758		31.7613	31.947	31.8195	31.9259	32.0512	31.8756	31.9983	31.9848	31.9153	31.9814	31.9294	31.8119	31.8829	32.0151	31.947
GAPDH	Glyceraldehyde-3-phosphate dehydrogenase	P04406;E7EUT4;E7EUT5;E7EU54	35.2316	35.4046	35.4247	35.4204	35.4401		0.172997	0.61008		0.193133	0.791644		0.188744	0.656544		0.208447	0.549465		0.0201365	0.954804		0.0157471	0.970354		0.03545	0.900207		0.644202		35.1415	35.1641	35.3892	35.3956	35.5354	35.2828	35.5032	35.2443	35.5267	35.4672	35.2584	35.5354	35.4733	35.5641	35.2828
GAPVD1	GTPase-activating protein and VPS9 domain-containing protein 1	Q14C86-5;Q14C86-2;Q14C86;Q14C86-6;Q14C86-3;Q14C86-4;F8W9S7;C9IZ08	27.8233	27.8438	27.926	27.9159	28.0529		0.0204932	0.952176		0.102689	0.853481		0.0925814	0.739639		0.229646	0.521973		0.0821959	0.762292		0.0720882	0.765814		0.209153	0.467465		0.558511		27.6527	27.9372	27.8799	27.8504	27.7325	27.9484	28.0349	27.7453	27.9977	27.8682	27.9705	27.9089	28.0505	27.9146	28.1937
GARS	Glycine--tRNA ligase	P41250	30.2439	30.234	30.4162	30.3886	30.3817		-0.00990931	0.976966		0.172209	0.810858		0.144697	0.613323		0.137802	0.58965		0.182118	0.558628		0.154607	0.68628		0.147711	0.671167		0.598778		30.3088	30.1361	30.2869	30.4234	30.2308	30.0479	30.4823	30.2647	30.5014	30.341	30.362	30.4629	30.5203	30.3828	30.2422
GART	Trifunctional purine biosynthetic protein adenosine-3;Phosphoribosylamine--glycine ligase;Phosphoribosylformylglycinamidine cyclo-ligase;Phosphoribosylglycinamide formyltransferase	P22102;P22102-2	28.6418	28.6165	28.827	28.6429	28.826		-0.0253607	0.954355		0.185163	0.81374		0.00112534	0.991252		0.184187	0.440663		0.210524	0.592416		0.0264861	0.960878		0.209548	0.552344		0.525874		28.6285	28.6004	28.6964	28.7927	28.3536	28.7031	28.7802	28.6764	29.0243	28.6181	28.5718	28.7389	28.7708	28.7927	28.9146
GAS2L1	GAS2-like protein 1	Q99501;E7EQM6;B5MCR7;Q99501-3;Q99501-2	27.0954	27.2613	27.3167	26.6794	26.4802		0.165914	0.655184		0.22131	0.803038		-0.415989	0.609142		-0.615223	0.478553		0.0553958	0.808844		-0.581903	0.508861		-0.781137	0.396149		0.208056		26.8623	27.2445	27.1795	27.1795	27.2979	27.3066	27.2625	27.217	27.4707	26.4661	26.8858	26.6865	26.5522	26.8504	26.038
GBA2	Non-lysosomal glucosylceramidase	F5H7P6;Q9HCG7-2;Q9HCG7;Q9HCG7-3	23.3811	24.1395	24.7418	24.5133	23.8928		0.75842	0.719324		1.36069	0.79625		1.13228	0.722484		0.511744	0.834763		0.602268	0.65369		0.373856	0.896479		-0.246675	0.9064		0.733583		22.514	24.7492	22.8801	23.6149	23.9225	24.8811	25.0443	23.8884	25.2926	25.0443	25.3745	23.1213	22.8691	25.2643	23.5451
GBAS	Protein NipSnap homolog 2	O75323;C9K068;C9IYJ3;C9J7B1;H7C333	24.0682	23.4231	23.7216	23.1834	24.0441		-0.645164	0.664293		-0.346579	0.935076		-0.884837	0.804628		-0.0241617	0.987592		0.298585	0.89802		-0.239674	0.957487		0.621002	0.572708		0.923944		23.1133	24.5045	24.5869	23.8153	23.2746	23.1793	24.5285	24.4984	22.1381	24.7338	20.8558	23.9607	23.2459	24.4249	24.4614
GBE1	1,4-alpha-glucan-branching enzyme	Q04446;E9PGM4	29.2079	29.5669	29.3601	29.6129	29.4221		0.358946	0.481141		0.152208	0.803249		0.405025	0.68329		0.214128	0.478374		-0.206739	0.373745		0.046079	0.901972		-0.144818	0.505096		0.203598		29.1937	29.066	29.3641	29.6544	29.4073	29.6389	29.3174	29.4093	29.3536	29.5014	29.6163	29.7211	29.4707	29.362	29.4334
GBF1	Golgi-specific brefeldin A-resistance guanine nucleotide exchange factor 1	Q92538	27.0873	27.0254	27.2969	27.362	27.1263		-0.0618509	0.941618		0.209639	0.81916		0.274752	0.684202		0.0390924	0.928429		0.27149	0.573621		0.336603	0.672568		0.100943	0.852856		0.618951		26.8264	27.0608	27.3745	27.3662	27.0505	26.6595	27.2354	27.3662	27.2891	27.5826	27.1795	27.3239	27.2077	27.0401	27.1312
GBP4	Guanylate-binding protein 4	Q96PP9	23.8536	24.227	24.3738	24.6208	24.1523		0.37335	0.901404		0.520171	0.886543		0.767164	0.75809		0.298705	0.880036		0.146822	0.948978		0.393814	0.863458		-0.0746441	0.972193		0.910002		24.7645	24.5285	22.2679	22.9818	25.002	24.6971	23.7594	25.0935	24.2685	24.6486	24.48	24.7338	24.2821	23.8858	24.2891
GC	Vitamin D-binding protein	D6RF35;P02774;D6RAK8;P02774-2;D6RBJ7	28.7995	28.7216	28.6244	28.5033	28.5303		-0.077919	0.761808		-0.175081	0.833418		-0.296136	0.616567		-0.269163	0.422655		-0.0971616	0.845284		-0.218217	0.694677		-0.191244	0.47754		0.602188		28.8858	28.7325	28.7802	28.6898	28.5862	28.8887	28.7927	28.3066	28.7739	28.6146	28.2123	28.6831	28.49	28.4551	28.6458
GCA	Grancalcin	H7BXD5;P28676;H7C2Z6	27.4844	26.986	27.4651	27.2251	27.2143		-0.498385	0.472147		-0.0192719	0.977609		-0.259295	0.620111		-0.270021	0.522752		0.479113	0.239964		0.23909	0.575451		0.228364	0.469836		0.238465		27.5389	27.2891	27.6251	27.0401	26.8264	27.0914	27.4394	27.632	27.3239	27.0813	27.3494	27.2445	27.0401	27.3494	27.2535
GCC1	GRIP and coiled-coil domain-containing protein 1	Q96CN9	23.7688	23.4032	23.5543	22.7208	22.8172		-0.365615	0.67497		-0.214548	0.918486		-1.04802	0.613849		-0.951637	0.565396		0.151066	0.894923		-0.682409	0.583122		-0.586023	0.670007		0.523851		23.3239	23.654	24.3285	23.2011	23.48	23.5285	23.0117	24.2749	23.3762	22.0707	22.9822	23.1095	23.6664	21.8487	22.9365
GCLC	Glutamate--cysteine ligase catalytic subunit	P48506	24.9672	23.9846	24.3595	24.3357	24.274		-0.982646	0.549956		-0.607688	0.842622		-0.631537	0.776816		-0.693237	0.667401		0.374959	0.858962		0.351109	0.909733		0.289409	0.880894		0.876138		25.3679	24.7846	24.7492	23.0999	24.6517	24.2021	23.1792	24.8385	25.0608	24.7796	22.9348	25.2926	24.9672	24.7995	23.0553
GCLM	Glutamate--cysteine ligase regulatory subunit	P48507	29.1594	29.3689	29.1205	29.3142	29.2229		0.209482	0.542623		-0.0389525	0.950713		0.154788	0.71247		0.0634912	0.565491		-0.248435	0.503264		-0.0546945	0.917237		-0.145991	0.501933		0.594458		29.1604	29.094	29.2239	29.509	29.3807	29.217	29.0531	28.94	29.3683	29.1628	29.2262	29.5536	29.21	29.258	29.2007
GCN1L1	Translational activator GCN1	Q92616	23.9908	24.2084	23.8281	23.5208	23.286		0.217598	0.838654		-0.162674	0.86261		-0.46996	0.735681		-0.704789	0.441726		-0.380272	0.650244		-0.687558	0.688694		-0.922387	0.411638		0.467453		23.9672	24.3511	23.654	23.7389	24.8842	24.002	23.6757	24.019	23.7895	24.2432	22.9283	23.391	23.422	23.2345	23.2015
GDI1	Rab GDP dissociation inhibitor alpha	P31150;B4DHX4	30.6828	30.7514	30.7699	30.9851	31.0121		0.0685412	0.744807		0.0870934	0.826482		0.302276	0.615412		0.329223	0.434559		0.0185521	0.933865		0.233735	0.599268		0.260682	0.379183		0.30221		30.5664	30.7129	30.7692	30.6544	30.8385	30.7613	30.8608	30.7692	30.6798	30.7613	31.0217	31.1724	31.1422	30.94	30.9539
GDI2	Rab GDP dissociation inhibitor beta	P50395;E7EU23;P50395-2;Q5SX87	32.5626	32.5833	32.7045	32.7314	32.8126		0.0206401	0.887677		0.141851	0.822131		0.168748	0.659389		0.249907	0.404387		0.121211	0.442999		0.148108	0.664195		0.229267	0.13973		0.319364		32.4702	32.6066	32.611	32.5504	32.6285	32.5709	32.7907	32.5956	32.7272	32.5822	32.6985	32.9135	32.8138	32.8157	32.8081
GET4	Golgi to ER traffic protein 4 homolog	Q7L5D6;Q7L5D6-2;C9JPA8;C9JHN8	24.8823	24.9772	24.8016	24.7927	24.9297		0.094909	0.84267		-0.08063	0.939015		-0.0895335	0.850642		0.0474307	0.926048		-0.175539	0.669009		-0.184443	0.531606		-0.0474784	0.880581		0.859241		24.824	24.632	25.1908	25.0772	25.0062	24.8481	24.48	24.9933	24.9316	24.7746	24.7846	24.8191	25.1135	24.9316	24.7441
GFOD1	Glucose-fructose oxidoreductase domain-containing protein 1	Q9NXC2	23.5795	23.6629	23.7129	23.7466	23.8301		0.0834459	0.959585		0.133436	0.968312		0.167129	0.940421		0.250624	0.904272		0.0499903	0.972487		0.083683	0.963084		0.167178	0.922645		0.998484		24.0443	22.6169	24.0772	23.4757	23.4302	24.0829	22.8934	23.9847	24.2607	23.9225	24.3712	22.9461	22.5695	24.6892	24.2317
GFPT1	Glutamine--fructose-6-phosphate aminotransferase [isomerizing] 1	Q06210-2;Q06210	23.7778	23.827	23.9104	23.7166	23.3809		0.0491441	0.976133		0.132553	0.927818		-0.0612628	0.959083		-0.396904	0.711903		0.083409	0.963696		-0.110407	0.957497		-0.446048	0.770618		0.890904		23.8288	24.1946	23.3101	22.8512	24.5771	24.0526	24.1095	23.4923	24.1294	23.6971	23.3511	24.1015	23.7182	22.6981	23.7265
GGA1	ADP-ribosylation factor-binding protein GGA1	Q9UJY5-4;Q9UJY5-3;Q9UJY5;Q6IC75;B0QYR6;Q9UJY5-2	23.5422	24.3098	24.3341	23.9126	23.464		0.767599	0.615309		0.791938	0.793152		0.370428	0.871981		-0.0781212	0.970657		0.0243384	0.964839		-0.397171	0.860532		-0.84572	0.579358		0.713175		22.8926	24.5105	23.2234	24.019	24.4488	24.4614	24.4488	24.374	24.1795	24.3511	22.7272	24.6595	22.6217	23.1495	24.6209
GGA3	ADP-ribosylation factor-binding protein GGA3	Q9NZ52;G3V1K5;Q9NZ52-2;B7Z456	26.2352	25.8021	25.0111	25.6847	25.246		-0.433126	0.60994		-1.22416	0.812232		-0.55055	0.608907		-0.989292	0.482243		-0.791034	0.47327		-0.117423	0.853476		-0.556166	0.56117		0.357085		26.3992	26.527	25.7796	25.6376	26.0691	25.6998	24.2096	25.1642	25.6595	25.7077	25.4984	25.8481	25.4984	24.5344	25.705
GGCT	Gamma-glutamylcyclotransferase	O75223;B8ZZN4;E7EU55;B8ZZK2	26.4804	26.0545	25.9994	26.2661	25.9329		-0.425845	0.621769		-0.480993	0.735339		-0.214237	0.713807		-0.547418	0.444973		-0.0551472	0.949157		0.211609	0.84602		-0.121572	0.863547		0.456057		26.2262	26.673	26.5419	25.5754	26.1035	26.4846	26.0995	25.8336	26.065	26.4202	26.3443	26.0338	25.9293	25.772	26.0975
GGH	Gamma-glutamyl hydrolase	Q92820;E5RGF0	25.6235	25.9732	25.8287	25.9911	25.7332		0.349694	0.542483		0.205199	0.792909		0.36761	0.624899		0.109772	0.746107		-0.144495	0.608067		0.0179157	0.979099		-0.239922	0.463891		0.464681		25.5404	25.8717	25.4583	25.9293	25.8069	26.1833	25.9066	25.8457	25.7338	26.2979	25.7895	25.8858	25.654	25.8433	25.7024
GGPS1	Geranylgeranyl pyrophosphate synthase	O95749;C9J6G3;C9J7M1	24.4586	25.2657	25.2957	24.9708	24.8455		0.80705	0.727682		0.837091	0.846902		0.512212	0.838597		0.386851	0.858846		0.0300414	0.971873		-0.294838	0.546453		-0.420199	0.293453		0.768476		25.654	22.7724	24.9495	25.3975	25.1174	25.2821	24.9043	25.1253	25.8576	24.8433	24.9361	25.1332	24.9134	24.8385	24.7846
GID8	Glucose-induced degradation protein 8 homolog	Q9NWU2	24.487	23.3452	24.3005	24.6211	24.1442		-1.14173	0.622429		-0.186412	0.922635		0.134115	0.860371		-0.342751	0.848913		0.955319	0.619961		1.27585	0.626855		0.79898	0.759704		0.663599		24.1871	24.2891	24.9847	22.1483	24.7182	23.1692	24.7077	24.604	23.59	24.632	24.4923	24.7389	24.5754	22.8088	25.0484
GIPC1	PDZ domain-containing protein GIPC1	O14908;A8K4I3	24.5878	23.4478	24.2284	24.6284	24.0081		-1.13998	0.621292		-0.359325	0.865193		0.0406539	0.97278		-0.579678	0.81719		0.780652	0.72191		1.18063	0.6739		0.560299	0.862039		0.799226		24.6595	24.3495	24.7543	24.7945	23.4582	22.0906	23.8093	25.217	23.659	25.1871	24.4738	24.2244	25.3066	24.6264	22.0912
GIPC3	PDZ domain-containing protein GIPC3	Q8TF64	26.7694	26.7698	26.8955	26.9075	26.7984		0.000420888	0.999254		0.12609	0.889561		0.138144	0.850095		0.0289923	0.973935		0.125669	0.772199		0.137723	0.856344		0.0285714	0.978289		0.97965		26.3562	26.8504	27.1015	27.1015	26.5898	26.6181	26.9977	26.8623	26.8264	26.8142	26.7771	27.1312	27.3325	26.3629	26.6998
GIT1	ARF GTPase-activating protein GIT1	Q9Y2X7;Q9Y2X7-3	28.7959	28.8843	28.7593	28.8455	28.7506		0.0884463	0.663333		-0.0365403	0.905276		0.0495993	0.839128		-0.045236	0.783472		-0.124987	0.334259		-0.038847	0.861827		-0.133682	0.274014		0.512168		28.726	28.9259	28.7357	28.8355	28.8916	28.9259	28.7096	28.8294	28.7389	28.7453	28.8623	28.9288	28.7421	28.7421	28.7676
GIT2	ARF GTPase-activating protein GIT2	F8W7V0;Q14161-9;Q14161-8;Q14161-5;Q14161;Q14161-7;Q14161-4;Q14161-3;F5H882;F8WAK2;F8VXI9;Q14161-2;Q14161-11;Q14161-6;Q14161-10;F8W822	23.0502	23.7625	23.7818	23.4932	23.1766		0.712289	0.784065		0.731585	0.860942		0.442977	0.875766		0.126349	0.963359		0.0192966	0.968485		-0.269312	0.568591		-0.585939	0.552244		0.836814		23.9425	24.0691	21.139	23.7594	23.976	23.5522	23.9043	23.5554	23.8858	23.4551	23.5016	23.5229	22.4617	23.7179	23.3501
GK	Glycerol kinase;Putative glycerol kinase 3	P32189-1;A6NJP5;P32189-2;P32189;F8W7S9;Q14409	28.1586	28.1283	28.2013	28.1631	28.2153		-0.0302308	0.960124		0.0427513	0.968464		0.00450261	0.992647		0.0567436	0.905888		0.0729822	0.825744		0.0347335	0.945549		0.0869745	0.721397		0.987571		28.3494	28.3367	27.7895	28.0349	28.0349	28.3153	28.3662	28.1065	28.1312	28.1361	27.9869	28.3662	28.2123	28.1937	28.2399
GK2	Glycerol kinase 2	Q14410	22.2469	24.0929	24.3836	25.4461	25.6876		1.84601	0.612091		2.13675	0.818174		3.19921	0.816021		3.44074	0.406492		0.290745	0.946251		1.35321	0.68109		1.59473	0.513126		0.302856		21.2938	23.579	21.8679	22.9747	23.2808	26.0233	22.4126	25.3376	25.4008	25.1332	25.6096	25.5955	25.7796	25.705	25.5783
GLA	Alpha-galactosidase A	P06280	25.7039	25.5374	25.7721	25.7933	25.9789		-0.166475	0.856296		0.0682303	0.971904		0.0894521	0.935323		0.274995	0.744329		0.234706	0.626364		0.255927	0.54715		0.44147	0.384288		0.734161		25.2317	26.3307	25.5492	25.6622	25.3376	25.6125	25.5045	25.6944	26.1174	25.8361	25.7594	25.7846	26.0567	25.7645	26.1154
GLB1	Beta-galactosidase	P16278-3;P16278;E7EQ29;P16278-2	27.6085	27.9595	27.8595	27.8889	28.1037		0.350967	0.589741		0.250966	0.822945		0.280313	0.706661		0.495195	0.510816		-0.100001	0.501112		-0.0706533	0.861207		0.144228	0.672519		0.424818		27.4234	28.003	27.3992	27.9146	28.0608	27.9031	27.9146	27.8682	27.7958	27.8019	27.7833	28.0813	28.0401	28.3452	27.9259
GLG1	Golgi apparatus protein 1	Q92896;Q92896-3;Q92896-2;H3BM42	25.7844	26.0278	25.5342	25.4116	25.6654		0.24334	0.777331		-0.250258	0.863172		-0.372855	0.72958		-0.119006	0.906056		-0.493598	0.393102		-0.616195	0.54286		-0.362347	0.603309		0.612445		25.8717	26.2535	25.228	25.8504	26.2678	25.965	25.2021	25.8336	25.5667	25.1015	25.5463	25.5869	25.4266	25.4073	26.1623
GLIPR2	Golgi-associated plant pathogenesis-related protein 1	Q5VZR0;Q9H4G4	24.1528	23.0634	23.9266	24.0932	24.2127		-1.08936	0.617955		-0.226185	0.89567		-0.0595919	0.978592		0.0599804	0.962177		0.863172	0.511002		1.02977	0.628292		1.14934	0.462917		0.503101		23.5045	24.9348	24.019	23.9139	22.0513	23.2249	23.7995	24.1038	23.8764	23.6431	24.6431	23.9933	24.391	24.4676	23.7796
GLO1	Lactoylglutathione lyase	Q04760;Q04760-2	28.9293	28.7207	29.1771	28.9637	29.105		-0.208591	0.614828		0.247747	0.800832		0.0343653	0.93916		0.17565	0.549351		0.456338	0.335677		0.242956	0.631282		0.38424	0.381787		0.323584		29.0914	28.8916	28.805	28.9174	28.5352	28.7096	29.4154	29.0889	29.027	28.8324	28.9031	29.1556	29.217	29.0737	29.0243
GLOD4	Glyoxalase domain-containing protein 4	E7EMY5;Q9HC38-2;B7Z403;Q9HC38;I3L3Q4	27.829	27.7708	27.991	27.7608	27.8285		-0.0582148	0.752807		0.16196	0.807755		-0.0681992	0.856061		-0.000468572	0.996913		0.220175	0.394901		-0.00998433	0.985012		0.0577463	0.764177		0.571241		27.9089	27.7518	27.8264	27.8799	27.7195	27.7129	28.1214	28.019	27.8324	27.9259	27.524	27.8324	27.9316	27.7645	27.7895
GLRX	Glutaredoxin-1	P35754	27.9476	27.6711	27.8184	27.7344	27.4341		-0.276527	0.750674		-0.129196	0.88636		-0.21323	0.756358		-0.513483	0.478865		0.147331	0.833656		0.0632966	0.945235		-0.236956	0.728125		0.558819		28.0505	27.5389	28.2535	28.0505	27.1795	27.7833	27.9202	27.7518	27.7833	27.8081	27.7771	27.6181	27.3578	27.5536	27.391
GLRX3	Glutaredoxin-3	O76003	28.8297	28.4756	28.9761	28.7529	28.7398		-0.354169	0.526818		0.146387	0.842625		-0.0768007	0.87606		-0.0898921	0.773537		0.500556	0.194401		0.277368	0.544861		0.264277	0.135799		0.285844		28.8355	28.611	29.0427	28.4433	28.4668	28.5165	28.8324	28.9622	29.1337	28.5826	28.7195	28.9567	28.7129	28.7421	28.7645
GLS	Glutaminase kidney isoform, mitochondrial	O94925-3;O94925	26.2879	23.2043	25.5422	25.0525	26.5853		-3.08352	0.527836		-0.745665	0.853622		-1.23533	0.757032		0.297427	0.728662		2.33786	0.376341		1.8482	0.678575		3.38095	0.170004		0.326281		26.0975	26.5344	26.2317	23.8838	23.0667	22.6626	23.7369	26.5135	26.3762	26.4815	22.4703	26.2058	26.0995	27.1795	26.4769
GLTP	Glycolipid transfer protein	Q9NZD2;F5H0U5	26.1558	25.7456	26.1681	25.9651	25.626		-0.410283	0.549735		0.012284	0.985218		-0.190725	0.713318		-0.529813	0.561609		0.422567	0.408595		0.219558	0.773386		-0.11953	0.89888		0.506622		26.2926	25.945	26.2299	26.0894	25.6703	25.4769	26.3205	26.0547	26.1293	26.0148	26.1391	25.7415	25.792	25.019	26.067
GLUD1	Glutamate dehydrogenase 1, mitochondrial	F5GYQ4;P00367;F8WA20;B4DGN5;B3KV55	27.3719	27.7842	27.2734	27.9496	27.849		0.412219	0.675388		-0.098554	0.904654		0.577631	0.58274		0.477102	0.460042		-0.510773	0.542578		0.165412	0.892578		0.0648836	0.94677		0.386485		27.1214	27.4629	27.5315	27.3828	28.4234	27.5463	27.5315	27.0084	27.2803	28.1214	27.7958	27.9316	27.6998	28.1214	27.726
GLUL	Glutamine synthetase	P15104;E7ESR6	24.0089	22.7613	23.1619	22.5771	22.9721		-1.2476	0.545536		-0.847045	0.786628		-1.43185	0.60593		-1.03678	0.549301		0.400554	0.577541		-0.184249	0.909759		0.210823	0.801538		0.370778		22.8978	24.7577	24.3712	22.8346	23.2421	22.2072	23.0119	23.232	23.2417	21.9017	22.8475	22.9819	22.6768	23.0856	23.154
GMDS	GDP-mannose 4,6 dehydratase	E9PI88;O60547	25.3045	25.313	25.369	25.433	25.1545		0.00849978	0.968208		0.0645173	0.893827		0.128541	0.772968		-0.14994	0.564225		0.0560176	0.867322		0.120041	0.811487		-0.15844	0.505304		0.599198		25.2607	25.239	25.4138	25.3376	25.3844	25.217	25.5609	25.1984	25.3477	25.1871	25.632	25.48	25.0401	25.1135	25.3101
GMFB	Glia maturation factor beta	E7EWZ9;P60983;G3V4P8	26.8968	26.5954	27.0764	27.0821	27.0776		-0.30136	0.615605		0.179578	0.848184		0.185343	0.822421		0.180769	0.767671		0.480938	0.108915		0.486703	0.552052		0.482129	0.380082		0.471698		27.1115	26.518	27.0608	26.6458	26.5507	26.5898	27.019	27.0401	27.17	26.6595	27.2803	27.3066	27.0813	27.3494	26.8019
GMFG	Glia maturation factor gamma	O60234	30.2934	30.5774	30.383	30.554	30.4774		0.283976	0.512047		0.0896002	0.855274		0.260605	0.704124		0.184018	0.442132		-0.194376	0.510272		-0.0233714	0.977213		-0.0999578	0.668703		0.616572		30.3515	30.2308	30.2979	30.6458	30.4234	30.6629	30.3724	30.2193	30.5573	30.4532	30.933	30.2759	30.4334	30.4234	30.5754
GMIP	GEM-interacting protein	E7ERB7;Q9P107	25.9522	25.5068	26.0753	25.5157	25.7307		-0.445389	0.501411		0.123018	0.889127		-0.436484	0.608683		-0.221527	0.643767		0.568408	0.350166		0.00890541	0.990206		0.223862	0.638106		0.34777		25.8927	25.8288	26.1352	25.5955	25.3239	25.6012	25.9517	26.4598	25.8142	25.5433	25.2244	25.7796	25.4707	26.0296	25.6918
GMPPA	Mannose-1-phosphate guanyltransferase alpha	Q96IJ6;Q96IJ6-2	27.217	27.0815	27.0305	26.8353	26.9115		-0.135489	0.799167		-0.186422	0.850642		-0.381668	0.632689		-0.3055	0.711529		-0.0509332	0.897536		-0.24618	0.585236		-0.170012	0.8083		0.730657		27.5389	26.8858	27.2262	27.217	27.0084	27.019	26.9202	26.9089	27.2625	26.9089	26.632	26.965	26.509	27.4234	26.8019
GMPPB	Mannose-1-phosphate guanyltransferase beta	Q9Y5P6;Q9Y5P6-2	28.4374	28.4524	28.65	28.6783	28.6958		0.015	0.971876		0.212551	0.680126		0.240878	0.605665		0.258376	0.413521		0.197551	0.578952		0.225878	0.6894		0.243376	0.537421		0.449063		28.49	28.4354	28.3869	28.5463	28.1652	28.6458	28.7227	28.6663	28.5609	28.7453	28.4938	28.7958	28.604	28.7064	28.7771
GMPR	GMP reductase 1	P36959	30.4492	30.4344	30.3573	30.5989	30.4797		-0.0148373	0.976306		-0.0918859	0.904222		0.149669	0.734101		0.0305551	0.949947		-0.0770486	0.896035		0.164506	0.783856		0.0453924	0.936044		0.867513		30.2422	30.5481	30.5573	30.6198	30.1724	30.5109	30.5481	30.4629	30.0608	30.7533	30.4234	30.6198	30.8004	30.341	30.2979
GMPR2	GMP reductase;GMP reductase 2	H0YMB3;H0YLV5;Q6PKC0;H0YNJ6;Q9P2T1;Q9P2T1-2;Q86T14	26.4327	27.0037	26.6389	26.8951	26.9702		0.570969	0.52745		0.206181	0.836321		0.46235	0.60955		0.537514	0.563616		-0.364787	0.389031		-0.108618	0.857403		-0.0334549	0.974593		0.471113		26.2821	26.7771	26.239	27.217	26.7645	27.0296	26.7518	26.7129	26.452	26.7518	26.8623	27.0711	27.391	26.4282	27.0914
GMPS	GMP synthase [glutamine-hydrolyzing]	P49915;B4DUT7;F8W720	26.1539	26.0275	26.3224	26.0505	26.254		-0.126446	0.764817		0.168481	0.886233		-0.103393	0.874419		0.100111	0.822569		0.294926	0.600366		0.0230529	0.97037		0.226557	0.441669		0.764596		25.867	26.3926	26.2021	26.1253	26.0233	25.9338	26.632	26.48	25.8552	26.3084	26.0813	25.7619	26.3959	26.1055	26.2607
GNA13	Guanine nucleotide-binding protein subunit alpha-13	Q14344;F8W818;F5H1G8	27.4112	27.9056	27.6545	27.7825	27.9828		0.494387	0.548212		0.24331	0.828528		0.37134	0.674388		0.571683	0.458144		-0.251078	0.458343		-0.123047	0.869071		0.0772959	0.821491		0.348738		26.9977	27.6389	27.5969	27.7325	28.17	27.8142	27.7064	27.632	27.6251	27.8799	27.4862	27.9814	27.9814	28.0243	27.9428
GNAI2	Guanine nucleotide-binding protein G(i) subunit alpha-2	P04899;F5H4U5;P04899-4;B4E2X5;P04899-3;P04899-2;B3KTZ0;F5GZL8	28.9461	29.5358	29.1305	29.4717	29.4609		0.589756	0.5412		0.18438	0.853748		0.52562	0.598323		0.514863	0.478509		-0.405376	0.477507		-0.0641359	0.925113		-0.0748933	0.888148		0.326525		28.6146	29.2781	28.9456	29.1771	29.8264	29.604	29.391	28.9787	29.0217	29.4976	29.362	29.5555	29.341	29.6407	29.4012
GNAQ	Guanine nucleotide-binding protein G(q) subunit alpha	P50148;B1AM21	28.9349	29.2348	29.0906	29.1329	29.5192		0.299913	0.669635		0.155746	0.854239		0.197992	0.734472		0.58433	0.515391		-0.144166	0.773428		-0.101921	0.888186		0.284417	0.703656		0.499904		28.632	29.2077	28.965	29.0349	29.5934	29.0762	28.9841	29.2714	29.0164	29.158	29.2647	28.976	29.341	29.9677	29.249
GNAS	Guanine nucleotide-binding protein G(s) subunit alpha isoforms short;Guanine nucleotide-binding protein G(s) subunit alpha isoforms XLas	P63092-3;P63092-2;P63092;A6NI00;Q5JWF2-2;Q5JWF2	24.9929	23.5213	25.0136	25.2128	25.2527		-1.47157	0.584595		0.0207094	0.985121		0.219913	0.698714		0.259855	0.565416		1.49228	0.477289		1.69148	0.584907		1.73142	0.467292		0.32559		25.0608	25.065	24.8528	22.4491	22.9506	25.1642	25.3745	24.8717	24.7945	25.2643	24.9316	25.4425	24.9716	25.48	25.3066
GNAZ	Guanine nucleotide-binding protein G(z) subunit alpha	P19086	27.8881	28.0348	28.0607	28.2492	28.4038		0.146694	0.805248		0.172593	0.830094		0.361114	0.609436		0.515675	0.522869		0.0258993	0.966531		0.21442	0.736041		0.368981	0.60795		0.500601		27.6181	28.0813	27.965	27.9259	28.3828	27.7958	27.9595	28.1312	28.0914	28.3704	28.1604	28.217	28.141	28.8534	28.217
GNB1	Guanine nucleotide-binding protein G(I)/G(S)/G(T) subunit beta-1	P62873;B1AKQ9;B1AKQ8	31.1812	31.4781	31.1704	31.4261	31.6168		0.296826	0.620705		-0.0107969	0.986967		0.244822	0.660894		0.435609	0.444101		-0.307623	0.445899		-0.0520045	0.924285		0.138783	0.719517		0.304025		31.015	31.4678	31.0608	31.225	31.7413	31.4678	31.2422	31.2019	31.0673	31.4919	31.3088	31.4775	31.6022	31.6329	31.6154
GNB2	Guanine nucleotide-binding protein G(I)/G(S)/G(T) subunit beta-2	P62879;E7EP32;C9JXA5;C9JIS1;C9JZN1;B3KPU1	28.9573	29.0801	28.8945	29.1668	29.1009		0.122844	0.660825		-0.0627778	0.904652		0.209553	0.657644		0.143683	0.569929		-0.185622	0.498475		0.0867087	0.856447		0.0208391	0.914793		0.518033		28.8264	29.0914	28.9539	29.0453	29.1866	29.0084	29.027	28.6998	28.9567	29.393	29.0084	29.099	29.158	28.9869	29.158
GNB2L1	Guanine nucleotide-binding protein subunit beta-2-like 1;Guanine nucleotide-binding protein subunit beta-2-like 1, N-terminally processed	D6RAC2;D6REE5;P63244;H0YAM7;H0Y8W2;H0Y8R5;D6RBD0;D6RFX4;H0YAF8;D6RHH4;D6R9Z1;D6R9L0	25.131	23.9468	24.9429	24.2739	24.4021		-1.18428	0.583636		-0.188166	0.843912		-0.857109	0.789016		-0.728911	0.42846		0.996113	0.524778		0.32717	0.890652		0.455368	0.780751		0.406451		24.8385	25.3943	25.1604	24.5638	22.6444	24.632	24.9089	24.7594	25.1604	24.2317	24.3511	24.239	24.3511	24.5522	24.3031
GNB4	Guanine nucleotide-binding protein subunit beta-4	Q9HAV0	27.2065	27.3721	27.1789	27.4954	27.2549		0.16555	0.712858		-0.0276044	0.983508		0.288877	0.677141		0.0483119	0.9089		-0.193155	0.720288		0.123327	0.803885		-0.117238	0.546881		0.696124		27.2714	27.4394	26.9089	27.2535	27.4234	27.4394	27.4785	27.3066	26.7518	27.524	27.2625	27.6998	27.189	27.2262	27.3494
GNB5	Guanine nucleotide-binding protein subunit beta-5	O14775-3;O14775-2;O14775;H0YNW7;Q96F32	27.0273	26.7194	26.7476	26.9335	26.8748		-0.30793	0.678302		-0.279694	0.790276		-0.0938244	0.854258		-0.152452	0.750309		0.0282358	0.969248		0.214106	0.800569		0.155478	0.807687		0.728193		26.8264	27.3239	26.9316	27.0084	26.2874	26.8623	26.8858	26.7389	26.6181	27.1115	26.8385	26.8504	26.8973	26.6458	27.0813
GNG11	Guanine nucleotide-binding protein G(I)/G(S)/G(O) subunit gamma-11	P61952	26.2715	26.6078	25.3462	26.5225	26.5877		0.33632	0.660834		-0.92535	0.842067		0.250952	0.777788		0.316229	0.634538		-1.26167	0.542294		-0.0853685	0.878982		-0.0200914	0.835838		0.530287		26.1332	26.7771	25.9043	26.632	26.632	26.5595	26.2077	23.5845	26.2463	26.2553	26.5225	26.7895	26.5478	26.6458	26.5696
GNG5	Guanine nucleotide-binding protein G(I)/G(S)/G(O) subunit gamma-5	P63218	27.3246	27.9456	27.0092	27.352	27.4227		0.621024	0.584306		-0.315442	0.849968		0.0274334	0.981088		0.0981312	0.912428		-0.936466	0.198026		-0.593591	0.481969		-0.522893	0.281011		0.320033		26.6458	27.5826	27.7453	28.0505	27.7833	28.003	27.1507	27.1507	26.726	27.1604	27.3494	27.5463	27.5609	27.3494	27.3578
GNL1	Guanine nucleotide-binding protein-like 1	P36915;A2AB27;B4DWZ0	25.5134	25.3987	25.7864	25.4686	25.5892		-0.114711	0.884015		0.27298	0.822375		-0.0448049	0.929126		0.0757847	0.870946		0.387691	0.560673		0.0699062	0.933944		0.190496	0.771422		0.691487		25.558	25.228	25.7543	25.7846	24.9628	25.4488	26.0935	25.5955	25.6703	25.4738	25.4583	25.4738	25.5195	25.8215	25.4266
GNPAT	Dihydroxyacetone phosphate acyltransferase	O15228;Q5TBH8;B4DNM9	24.8831	23.9669	23.9046	23.7267	24.4991		-0.916208	0.50852		-0.978518	0.805371		-1.15645	0.668101		-0.384013	0.656177		-0.0623093	0.966686		0	0		0.532195	0.408799		0.32034		25.3877	24.4425	24.8191	23.9495	23.9955	23.9558	23.1863	24.7182	23.8093	23.4607	23.9069	23.8125	24.6649	24.7389	24.0935
GNPDA1	Glucosamine-6-phosphate isomerase 2;Glucosamine-6-phosphate isomerase;Glucosamine-6-phosphate isomerase 1	Q8TDQ7-3;Q8TDQ7-2;Q8TDQ7;D6R917;D6RB13;D6RAY7;D6R9P4;P46926	24.3276	24.0352	24.2099	24.2185	23.295		-0.292401	0.913677		-0.117747	0.983049		-0.109151	0.978265		-1.03265	0.748702		0.174654	0.951101		0.18325	0.958158		-0.740253	0.822082		0.932564		23.6649	25.5926	23.7253	22.8256	24.5671	24.7129	24.5522	25.2133	22.8642	24.9539	22.8157	24.8858	25.5404	22.7399	21.6046
GNPNAT1	Glucosamine 6-phosphate N-acetyltransferase	Q96EK6;G3V5E4;G3V4W4	23.8115	24.2768	22.8227	23.5479	24.307		0.465312	0.752089		0	0		-0.263599	0.935107		0.495457	0.756212		-1.45409	0.455705		-0.728911	0.843603		0.030145	0.989736		0.662171		23.2694	24.5111	23.6539	24.651	23.41	24.7695	21.529	23.5164	23.4227	22.026	23.5527	25.065	24.8385	23.2248	24.8576
GNS	N-acetylglucosamine-6-sulfatase	B4DTT0;H7C3P4;F6S8M0;B4DYH8;P15586;F5H4C6;F5H260	23.9242	23.6303	24.1608	24.5966	24.6957		-0.293952	0.908311		0.236548	0.952779		0.672406	0.733153		0.771507	0.618145		0.5305	0.805904		0.966358	0.644169		1.06546	0.479914		0.691604		22.7479	24.7077	24.317	22.6	23.6258	24.6649	24.7441	22.989	24.7492	24.8576	24.317	24.6153	24.5754	24.8093	24.7024
GOLGA2	Golgin subfamily A member 2	Q08379;Q08379-2	26.2462	26.3498	26.3295	26.2696	26.095		0.103636	0.881259		0.0833371	0.930807		0.0234521	0.978992		-0.151152	0.776214		-0.0202993	0.969463		-0.0801843	0.897292		-0.254788	0.564262		0.803182		25.8576	26.4785	26.4024	26.4008	26.0588	26.5898	26.4629	26.3728	26.1527	26.1352	26.3828	26.2909	26.1604	26.2021	25.9225
GOLGA3	Golgin subfamily A member 3	Q08378;Q08378-2;Q08378-4	24.6633	24.4767	24.6987	24.5521	24.6393		-0.186656	0.750368		0.0353394	0.971807		-0.11128	0.896695		-0.0240485	0.96354		0.221996	0.449938		0.0753765	0.932574		0.162608	0.571669		0.882469		24.9134	24.2821	24.7945	24.3578	24.3645	24.7077	24.6703	24.7286	24.6971	24.945	24.5165	24.1946	24.6153	24.6486	24.654
GOLGA4	Golgin subfamily A member 4	H0Y6I0;Q13439-3;Q13439-4;Q13439;F8W8Q7;C9JHJ5	24.4224	25.2033	23.2688	24.344	23.3465		0.780863	0.722956		-1.15357	0.825064		-0.0784486	0.981928		-1.07586	0.66472		-1.93443	0.251607		-0.859311	0.706607		-1.85673	0.391461		0.490109		25.3778	25.1055	22.7839	25.3205	24.945	25.3443	22.5026	23.1173	24.1866	25.1719	24.8904	22.9696	24.2837	23.3717	22.3842
GOLGB1	Golgin subfamily B member 1	E7EP74;Q14789;E7EU81	28.4158	27.476	28.2048	28.0814	27.7661		-0.939873	0.484428		-0.211034	0.845428		-0.334431	0.76241		-0.649716	0.477515		0.72884	0.396075		0.605442	0.680244		0.290157	0.76241		0.436877		28.5934	28.4938	28.1604	27.509	26.965	27.9539	27.9869	28.0813	28.5463	27.7958	27.7064	28.7421	27.3992	28.2262	27.673
GOLPH3	Golgi phosphoprotein 3	Q9H4A6;F5H7W9	26.4765	26.9658	26.571	26.5592	26.4208		0.489327	0.607699		0.0944901	0.932395		0.0827211	0.890432		-0.0556984	0.908938		-0.394837	0.594619		-0.406606	0.673089		-0.545026	0.463342		0.558125		26.4425	26.2225	26.7645	27.1115	27.3153	26.4707	26.9428	26.2979	26.4723	26.5404	26.3477	26.7895	26.6181	26.3239	26.3205
GOLPH3L	Golgi phosphoprotein 3-like	Q9H4A5;Q5T5I6;E9PFK1;F5H4M3	24.8118	24.7325	24.8605	24.1337	25.2379		-0.0792859	0.804449		0.0486622	0.959764		-0.678072	0.750196		0.426049	0.442468		0.127948	0.798087		-0.598786	0.809822		0.505335	0.32621		0.558039		24.9628	24.7286	24.7441	24.7796	24.8717	24.5463	24.9495	25.0975	24.5344	24.7543	22.7612	24.8858	25.239	25.3811	25.0935
GOPC	Golgi-associated PDZ and coiled-coil motif-containing protein	F5H1Y4;Q9HD26-2;Q9HD26	24.9008	23.757	24.9542	24.7963	24.5465		-1.14388	0.66114		0.0533339	0.983548		-0.104577	0.943553		-0.354328	0.741646		1.19721	0.510686		1.0393	0.685263		0.789549	0.690712		0.550349		24.5869	24.3844	25.7312	24.4551	22.2288	24.5869	25.0732	24.9271	24.8623	24.8576	24.8717	24.6595	24.4425	24.3975	24.7995
GORASP2	Golgi reassembly-stacking protein 2	B4DEI4;Q9H8Y8;B4DKT0;Q9H8Y8-2	25.6425	26.0277	26.0016	26.1265	26.1779		0.385244	0.663967		0.359131	0.832647		0.483973	0.659422		0.535423	0.564376		-0.0261129	0.966389		0.0987295	0.80336		0.15018	0.727674		0.581738		25.1449	26.1871	25.5955	25.9089	26.1469	26.0275	26.2188	25.6568	26.1293	25.9716	26.2785	26.1293	26.038	26.0127	26.4831
GOT1	Aspartate aminotransferase, cytoplasmic;Aspartate aminotransferase	P17174;B7Z7E9;B7Z1I2	28.3723	28.0738	28.1573	27.8868	27.915		-0.298482	0.479165		-0.214965	0.828628		-0.485463	0.521624		-0.45731	0.407211		0.0835164	0.725773		-0.186981	0.549111		-0.158829	0.550444		0.19498		28.2714	28.4668	28.3787	27.9977	28.0349	28.189	28.2308	28.249	27.9923	27.8264	27.8858	27.9484	27.7389	28.003	28.003
GP1BA	Platelet glycoprotein Ib alpha chain;Glycocalicin	P07359;E7ES66	32.1109	32.4018	32.4127	32.3369	32.4851		0.290853	0.668485		0.301824	0.810218		0.225997	0.771491		0.374173	0.604331		0.0109711	0.966566		-0.0648562	0.888976		0.0833206	0.862272		0.658992		31.7088	32.4847	32.1392	32.2842	32.5435	32.3776	32.4209	32.3568	32.4605	32.1483	32.3515	32.5109	32.2077	32.8042	32.4433
GP1BB	Platelet glycoprotein Ib beta chain	F5H0F6;P13224;P13224-2	30.1691	30.5328	30.3031	30.1472	30.6669		0.363761	0.674825		0.134077	0.897837		-0.0218995	0.982581		0.497812	0.54772		-0.229684	0.595529		-0.38566	0.583511		0.134051	0.794178		0.450482		29.6964	30.5573	30.2535	30.6372	30.7771	30.1842	30.4032	30.2193	30.2869	30.1842	29.9814	30.2759	30.5014	30.8534	30.6458
GP5	Platelet glycoprotein V	P40197	32.6234	32.4555	32.2453	31.9847	32.0707		-0.167876	0.794418		-0.378078	0.810741		-0.638651	0.569387		-0.552633	0.514693		-0.210203	0.560832		-0.470775	0.536022		-0.384757	0.497397		0.322848		32.3515	33.01	32.5085	32.2193	32.7088	32.4384	32.2019	32.3646	32.1694	31.7771	32.0348	32.1422	31.8608	32.4184	31.933
GP6	Platelet glycoprotein VI	Q9HCN6-2;Q9HCN6;Q9HCN6-3	29.1477	29.3225	29.325	29.2417	29.4193		0.174863	0.745251		0.177295	0.845717		0.0940126	0.84985		0.27164	0.618151		0.00243251	0.996372		-0.08085	0.873266		0.0967776	0.841146		0.760527		28.8799	29.4294	29.1337	29.0711	29.5014	29.3951	29.341	29.4688	29.1652	29.1337	29.3001	29.2913	29.1913	29.6798	29.3869
GP9	Platelet glycoprotein IX	P14770	30.7144	31.0345	30.9439	31.0402	31.0576		0.320157	0.688193		0.229519	0.864251		0.325839	0.726638		0.343206	0.667645		-0.0906385	0.840555		0.00568199	0.975597		0.023049	0.958472		0.734262		30.2077	31.1901	30.7453	31.0017	31.0283	31.0737	31.2703	30.8081	30.7533	31.099	31.0608	30.9609	30.7771	31.1422	31.2535
GPCPD1	Glycerophosphocholine phosphodiesterase GPCPD1	Q9NPB8;H0Y565;E9PDI1	24.7297	24.334	24.3393	23.9952	23.7202		-0.395685	0.632082		-0.390325	0.860964		-0.734447	0.575212		-1.0095	0.437597		0.00535965	0.99755		-0.338763	0.55703		-0.61382	0.331577		0.464973		25.0062	24.2244	24.9584	24.1095	24.317	24.5754	23.8093	23.8576	25.3511	23.9316	24.0772	23.9768	23.6971	23.8764	23.5869
GPD1L	Glycerol-3-phosphate dehydrogenase 1-like protein;Glycerol-3-phosphate dehydrogenase [NAD(+)]	Q8N335;C9JM46;C9JFA7	26.8647	26.4052	26.7952	26.6267	26.7194		-0.459508	0.486685		-0.0694529	0.939601		-0.237937	0.599144		-0.145323	0.654523		0.390055	0.453548		0.22157	0.584342		0.314185	0.44963		0.390259		27.0296	26.726	26.8385	26.632	26.2926	26.2909	26.4598	26.8858	27.0401	26.5898	26.6865	26.604	26.558	26.8741	26.726
GPD2	Glycerol-3-phosphate dehydrogenase, mitochondrial	P43304;P43304-2;F8W6E4	28.7094	29.0183	29.0612	29.1554	29.1587		0.308976	0.548389		0.351882	0.838731		0.446037	0.613758		0.449371	0.430855		0.0429058	0.936109		0.137061	0.880751		0.140395	0.730348		0.509731		28.5499	28.7518	28.8264	28.8324	29.2714	28.9512	29.1604	28.8203	29.203	29.5772	29.0505	28.8385	29.027	29.3303	29.1189
GPI	Glucose-6-phosphate isomerase	P06744;P06744-2	32.2184	32.0752	32.211	32.2316	32.2594		-0.143223	0.67773		-0.00740306	0.984814		0.0131836	0.969734		0.0410093	0.833385		0.13582	0.57289		0.156406	0.680505		0.184232	0.479266		0.605945		32.2222	32.0896	32.3436	32.0576	32.2563	31.9117	32.1634	32.2106	32.2591	32.1694	32.3383	32.1872	32.2759	32.2019	32.3006
GPS1	COP9 signalosome complex subunit 1	Q13098-5;Q13098;Q13098-7;C9JFE4;Q13098-6	28.3733	28.1591	28.4373	28.2506	28.1476		-0.214216	0.611191		0.0640583	0.862374		-0.122706	0.778623		-0.225648	0.516368		0.278275	0.361724		0.0915101	0.872745		-0.0114314	0.977364		0.452886		28.5165	28.2123	28.391	28.3109	27.9539	28.2123	28.391	28.4234	28.4976	28.2216	28.0711	28.4591	28.0813	28.0813	28.2803
GPSM3	G-protein-signaling modulator 3	E9PIP3;Q9Y4H4	26.8316	26.8976	26.9685	26.8412	27.3814		0.0659631	0.964986		0.136889	0.948618		0.00963974	0.992905		0.54982	0.662873		0.070926	0.897854		-0.0563234	0.936264		0.483857	0.50618		0.700019		26.2463	27.726	26.5225	27.1984	26.9539	26.5404	26.9977	26.965	26.9428	26.9202	26.7771	26.8264	26.9539	27.524	27.6663
GPX1	Glutathione peroxidase 1	P07203	31.6602	31.9078	31.7431	31.9036	31.9826		0.247578	0.658144		0.0829074	0.940371		0.243415	0.772652		0.322354	0.594461		-0.164671	0.720231		-0.00416374	0.999236		0.0747757	0.854841		0.782262		31.4334	32.0084	31.5389	32.0084	31.9224	31.7927	32.0832	31.4581	31.6881	31.8081	31.6022	32.3006	32.0512	31.7006	32.196
GPX4	Phospholipid hydroperoxide glutathione peroxidase, mitochondrial	P36969-2;P36969	29.0852	28.9407	28.826	29.0546	29.0696		-0.144492	0.718201		-0.259194	0.826677		-0.030599	0.944274		-0.0155856	0.971866		-0.114702	0.840514		0.113893	0.788439		0.128906	0.745865		0.72774		28.9344	29.019	29.3023	29.109	28.7676	28.9456	29.1435	28.8294	28.5052	29.0479	28.9484	29.1676	29.203	28.8264	29.1795
GPX7	Glutathione peroxidase 7	Q96SL4	25.3514	25.8107	25.7128	26.0167	25.9888		0.459351	0.660486		0.361485	0.84456		0.665334	0.621026		0.637424	0.580173		-0.0978661	0.927795		0.205983	0.860773		0.178073	0.862581		0.676122		25.065	25.8997	25.0894	26.2535	25.6264	25.5522	26.2499	25.3811	25.5075	26.4473	25.9271	25.6757	26.6595	25.7518	25.5551
GRAP2	GRB2-related adapter protein 2	O75791;F5H1V3;B7Z8F8;B7Z8E3;F5H548	29.4731	29.3885	29.5365	29.5515	29.5734		-0.0846392	0.690415		0.0634155	0.855278		0.0783469	0.869122		0.100239	0.618463		0.148055	0.388284		0.162986	0.761173		0.184878	0.381496		0.708533		29.509	29.5609	29.3494	29.461	29.3196	29.3848	29.5898	29.4354	29.5844	29.3452	29.4707	29.8385	29.5628	29.6578	29.4995
GRB10	Growth factor receptor-bound protein 10	Q13322-3;Q13322-2;Q13322-4;Q13322	24.5116	24.1215	24.5979	24.6562	24.2087		-0.390035	0.736659		0.0863552	0.890797		0.144634	0.742239		-0.302872	0.460316		0.47639	0.650824		0.534669	0.720811		0.0871627	0.944529		0.614237		24.4614	24.3975	24.6757	23.3675	24.1253	24.8717	24.4425	24.8528	24.4984	24.7182	24.4362	24.8142	24.2891	24.2678	24.0691
GRB2	Growth factor receptor-bound protein 2	P62993;P62993-2	30.9937	30.9719	31.0435	31.1056	31.0649		-0.021759	0.941128		0.0498053	0.86486		0.1119	0.730839		0.0711753	0.746634		0.0715644	0.775426		0.133659	0.759891		0.0929343	0.755221		0.826806		30.9188	31.0673	30.995	30.8608	31.1361	30.9188	31.1544	31.0084	30.9677	31.2365	30.9259	31.1544	31.225	30.995	30.9746
GRHPR	Glyoxylate reductase/hydroxypyruvate reductase	Q9UBQ7;Q5T946	28.4451	28.7001	28.6241	28.6533	28.6616		0.255	0.550917		0.178938	0.807158		0.208188	0.597116		0.216413	0.381879		-0.0760619	0.881547		-0.0468114	0.923198		-0.0385863	0.902677		0.602538		28.4629	28.3787	28.4938	28.5536	28.9428	28.604	28.5352	28.4629	28.8741	28.5826	28.5754	28.8019	28.6697	28.6865	28.6285
GRIPAP1	GRIP1-associated protein 1	Q4V328;B1B0M1;F5H504;Q4V328-4;Q4V328-2;Q4V328-3	29.1438	29.2901	29.2355	29.4408	29.3637		0.146221	0.545583		0.0916882	0.822984		0.296986	0.723824		0.219861	0.431311		-0.0545324	0.650641		0.150766	0.539593		0.0736402	0.462309		0.207619		29.1115	29.267	29.0531	29.3303	29.3023	29.2376	29.3174	29.2216	29.1676	29.3641	29.4532	29.5052	29.3869	29.3153	29.389
GRK5	G protein-coupled receptor kinase 5	G8JLE8;P34947	25.0392	25.099	24.846	25.3153	25.039		0.0597909	0.955488		-0.193161	0.889603		0.276089	0.849757		-0.000197093	0.999583		-0.252952	0.565095		0.216298	0.880168		-0.059988	0.907502		0.855933		24.4862	25.5955	25.0359	24.8385	25.3135	25.1449	25.0772	24.8288	24.632	24.7846	25.1253	26.0359	24.8717	24.9043	25.341
GRK6	G protein-coupled receptor kinase 6	P43250-2;F8W9W2;P43250-3;P43250;D6RHX8	26.9956	27.257	27.1345	27.3764	27.0796		0.261389	0.61024		0.138863	0.797677		0.380758	0.627		0.0839895	0.740491		-0.122526	0.72017		0.11937	0.890181		-0.177399	0.647675		0.523475		26.8504	27.1604	26.976	27.189	27.0505	27.5315	27.1312	27.1214	27.1507	27.0813	27.3153	27.7325	27.17	27.0711	26.9977
GSAP	Gamma-secretase-activating protein;Gamma-secretase-activating protein 16 kDa C-terminal form	A4D1B5;A4D1B5-3;A4D1B5-2	25.3936	25.012	24.9457	24.8884	24.4761		-0.38166	0.62753		-0.447973	0.801269		-0.505253	0.614515		-0.91754	0.59461		-0.0663128	0.940603		-0.123593	0.910947		-0.53588	0.761831		0.691136		25.4614	25.6181	25.1015	24.8336	24.7441	25.4583	25.3135	24.7846	24.7389	24.7441	24.632	25.2891	24.9043	23.1933	25.3307
GSDMD	Gasdermin-D	G3V1A6;P57764;E9PIB2	27.0836	27.1249	27.6243	26.8136	27.0898		0.0412483	0.941233		0.540724	0.705653		-0.27003	0.742006		0.006169	0.987963		0.499475	0.164296		-0.311278	0.673823		-0.0350793	0.89993		0.247187		27.3828	26.8385	27.0296	26.9977	27.1507	27.2262	27.5682	27.6251	27.6798	26.8973	26.4122	27.1312	27.1984	27.1507	26.9202
GSK3A	Glycogen synthase kinase-3 alpha	P49840;A8MT37;F5H7D7	26.309	26.3254	26.4829	26.2274	26.4504		0.0163396	0.983252		0.173841	0.827956		-0.0816288	0.860757		0.14133	0.858787		0.157501	0.774412		-0.0979684	0.906851		0.12499	0.892471		0.906822		26.5898	26.1075	26.2299	26.632	25.9111	26.433	26.4692	26.4041	26.5754	26.3578	26.1449	26.1795	26.1681	26.143	27.0401
GSK3B	Glycogen synthase kinase-3 beta	P49841;P49841-2	27.5117	27.5076	27.7732	27.7641	27.8773		-0.00404358	0.997759		0.261502	0.823938		0.252389	0.714394		0.365671	0.553637		0.265546	0.430062		0.256432	0.583804		0.369714	0.416265		0.506701		27.1795	27.8019	27.5536	27.4073	27.6527	27.4629	27.9484	27.7958	27.5754	27.6998	27.611	27.9814	27.9202	27.6458	28.066
GSN	Gelsolin	P06396-2;F5H8M4;F8WA45	34.1243	34.2871	34.358	34.2738	34.2712		0.162762	0.583844		0.23364	0.794509		0.149414	0.727279		0.146881	0.633189		0.0708783	0.820592		-0.0133476	0.972246		-0.0158806	0.94565		0.689798		34.0832	34.2965	33.9933	34.2549	34.3236	34.2828	34.581	34.1827	34.3101	34.3892	34.0753	34.3568	34.4272	34.1529	34.2336
GSPT1	Eukaryotic peptide chain release factor GTP-binding subunit ERF3A	P15170-2;P15170;H3BR35	30.1231	30.2698	30.2035	30.2356	30.3561		0.146712	0.539657		0.0804214	0.821574		0.112447	0.773738		0.232965	0.450305		-0.0662905	0.642753		-0.0342649	0.943089		0.0862535	0.682585		0.538781		30.1115	30.1842	30.0737	30.2647	30.1724	30.3724	30.2422	30.1842	30.1842	30.1604	30.0737	30.4727	30.3828	30.2422	30.4433
GSR	Glutathione reductase, mitochondrial	P00390-2;P00390-3;P00390;P00390-5;P00390-4	29.4703	29.0833	29.5352	29.486	29.5581		-0.386949	0.548162		0.0649223	0.925691		0.0157572	0.981291		0.0878048	0.832772		0.451871	0.289699		0.402706	0.536507		0.474754	0.385411		0.308378		29.267	29.7549	29.389	28.8445	29.1386	29.267	29.4551	29.651	29.4995	29.4194	29.4294	29.6093	29.6163	29.6527	29.4053
GSS	Glutathione synthetase	P48637;B6F210;B7Z514	25.8961	25.7154	25.7424	26.0162	25.9729		-0.180733	0.671315		-0.153712	0.828674		0.120033	0.758018		0.0767759	0.805197		0.0270214	0.940194		0.300766	0.540701		0.257509	0.422361		0.356475		26.1293	25.7746	25.7846	25.8457	25.5285	25.772	25.8647	25.6237	25.7389	25.9495	25.9955	26.1035	25.902	26.0041	26.0127
GSTK1	Glutathione S-transferase kappa 1	Q9Y2Q3;Q9Y2Q3-3;Q9Y2Q3-2;E9PFN5;Q9Y2Q3-4	28.2105	28.7579	28.7566	28.8843	28.8741		0.547349	0.610826		0.546026	0.805025		0.6738	0.618907		0.663513	0.514137		-0.00132306	0.997899		0.126451	0.843572		0.116164	0.706394		0.357611		28.2077	28.7645	27.6595	28.5315	28.9372	28.805	28.8504	28.7064	28.7129	28.8945	28.6697	29.0889	28.8682	28.8682	28.8858
GSTM1	Glutathione S-transferase Mu 1	P09488;E7EWW9;P09488-2;B9ZVX7;H3BRM6	27.5597	27.8117	27.7785	27.819	27.4484		0.25195	0.953286		0.218728	0.974167		0.259242	0.959962		-0.111343	0.976591		-0.0332222	0.99282		0.00729179	0.999993		-0.363293	0.90044		0.99901		27.3153	25.5869	29.7771	27.7325	26.673	29.0296	27.6527	26.604	29.0788	27.6998	26.5105	29.2467	27.4707	25.8528	29.0217
GSTM2	Glutathione S-transferase Mu 2	P28161;E9PHN6;F6XZQ7;E9PEM9;E9PHN7;E9PLF1	27.7652	27.2927	27.3567	27.306	27.4269		-0.472436	0.744583		-0.408447	0.861653		-0.459197	0.785722		-0.33829	0.810372		0.0639884	0.966318		0.0132383	0.997004		0.134146	0.908527		0.930402		28.0965	26.8623	28.3367	27.0608	26.8858	27.9316	27.0914	26.965	28.0137	27.3828	26.632	27.9031	27.217	26.9977	28.066
GSTM3	Glutathione S-transferase Mu 3	P21266	29.1327	28.3918	28.6018	28.416	28.4898		-0.740876	0.484712		-0.530855	0.733373		-0.71667	0.774893		-0.642908	0.459087		0.210021	0.706023		0.0242055	0.97864		0.0979678	0.896825		0.320712		29.2979	28.9231	29.1771	28.7549	28.3494	28.0711	28.8564	28.4823	28.4668	28.5499	28.5718	28.1263	28.6181	28.7802	28.0711
GSTM4	Glutathione S-transferase Mu 4	Q03013-2;Q03013;Q4JNT8;A6NNT0	23.7599	24.125	23.775	23.2401	23.734		0.365122	0.916252		0.0150922	0.997743		-0.519772	0.875602		-0.0259317	0.991665		-0.35003	0.846475		0	0		-0.391054	0.851555		0.949996		22.2306	23.2595	25.7895	23.7567	23.7751	24.8434	23.0831	23.3749	24.867	23.7671	22.5056	23.4477	22.8602	23.1509	25.1908
GSTM5	Glutathione S-transferase Mu 5	P46439;Q5T8R1;Q5T8Q9	23.3701	23.5337	23.2594	23.5805	23.2436		0.163566	0.95355		-0.110691	0.984391		0.210409	0.944282		-0.126487	0.961276		-0.274257	0.896111		0.0468432	0.984911		-0.290053	0.872645		0.99339		21.9152	24.477	23.7182	24.0402	23.9567	22.6042	23.6776	22.2055	23.895	22.5863	24.1109	24.0443	22.6978	22.6955	24.3376
GSTO1	Glutathione S-transferase omega-1	P78417;D3DRA3;Q5TA02;F5H7H0;Q5TA01	32.6322	32.8037	32.9035	32.8567	32.7483		0.171494	0.835476		0.271261	0.847344		0.224442	0.790343		0.116056	0.871103		0.099767	0.70075		0.052948	0.910336		-0.0554377	0.862306		0.83547		32.9522	32.8901	32.0544	32.7047	33.01	32.6964	32.8366	32.9027	32.9712	32.9347	32.7129	32.9224	32.8737	32.6198	32.7514
GSTP1	Glutathione S-transferase P	P09211;A8MX94	32.7538	32.9941	32.8404	33.0338	33.051		0.240323	0.541449		0.0866343	0.853217		0.279994	0.613377		0.297237	0.525632		-0.153689	0.279001		0.0396703	0.887525		0.056914	0.851967		0.369206		32.8023	32.9063	32.5527	32.9916	33.056	32.9347	32.8062	32.8195	32.8956	33.0299	32.9171	33.1544	33.1559	32.8233	33.1739
GSTT1	Glutathione S-transferase theta-1	P30711;E9PH92;C9JA47;G3XAK0	23.3994	24.0401	23.6174	24.2351	23.7828		0.640673	0.777149		0.21804	0.97084		0.83575	0.7439		0.383374	0.861045		-0.422633	0.880582		0.195077	0.920758		-0.257299	0.873028		0.929226		24.1565	21.8918	24.1499	23.4041	24.7846	23.9316	21.8581	24.6431	24.3511	23.5165	24.7338	24.4551	23.6209	24.7077	23.0197
GSTT2	Glutathione S-transferase theta-2B;Glutathione S-transferase theta-2	Q6ICJ4;P0CG30;B5MCL2;P0CG29	26.7742	24.0668	24.7093	24.6731	24.6239		-2.70741	0.534309		-2.06484	0.826272		-2.10108	0.621569		-2.1503	0.519958		0.642569	0.873034		0.606328	0.895759		0.557106	0.873117		0.56811		26.2096	27.509	26.604	24.824	22.1483	25.228	25.8552	22.7414	25.5315	25.5014	22.9924	25.5255	25.4676	22.6421	25.7619
GSTZ1	Maleylacetoacetate isomerase	G3V267;G3V5T0;G3V4T6;O43708-2;A6NED0;O43708;G3V3B9	24.4705	23.6352	23.8174	23.5122	24.1769		-0.835334	0.545794		-0.65309	0.835755		-0.958382	0.626224		-0.293654	0.661106		0.182243	0.933778		-0.123049	0.961104		0.541679	0.653107		0.701206		24.5344	24.4862	24.391	23.186	23.3091	24.4105	22.6384	24.7286	24.0854	24.08	23.9933	22.4631	24.2244	24.6096	23.6967
GTDC1	Glycosyltransferase-like domain-containing protein 1	Q4AE62-2;Q4AE62;B8ZZ45;Q4AE62-3;G5EA49;H7BYJ5	24.6347	24.6923	24.6347	24.561	24.7541		0.0576178	0.952895		-6.61214e-05	0.999666		-0.0737597	0.854463		0.119387	0.736303		-0.0576839	0.949272		-0.131378	0.896805		0.0617688	0.936075		0.943265		24.7286	24.7846	24.391	24.9134	25.0148	24.1488	24.6595	24.48	24.7645	24.5404	24.4614	24.6811	24.8142	24.6096	24.8385
GTPBP1	GTP-binding protein 1	O00178	26.1462	26.6538	26.7201	26.4107	26.4806		0.507614	0.390993		0.573892	0.752741		0.264491	0.613884		0.334364	0.436739		0.0662778	0.915193		-0.243123	0.628601		-0.17325	0.572211		0.313752		26.1546	26.1371	26.1469	26.6865	26.7645	26.5105	27.0296	26.7645	26.3662	26.6595	26.3101	26.2625	26.632	26.5135	26.2961
GTPBP2	GTP-binding protein 2	Q9BX10;Q9BX10-4;Q9BX10-2;H0Y7A5	29.572	29.4946	29.5698	29.4466	29.5276		-0.0774002	0.71362		-0.00213687	0.996782		-0.125418	0.70993		-0.044363	0.791004		0.0752633	0.682376		-0.0480175	0.890588		0.0330372	0.826723		0.726856		29.6747	29.4785	29.5628	29.5951	29.4492	29.4394	29.6865	29.5407	29.4823	29.3848	29.3473	29.6075	29.4804	29.5109	29.5916
GUCY1A3	Guanylate cyclase soluble subunit alpha-3	Q02108;D6RDW3	29.4125	29.2564	29.709	29.4573	29.3991		-0.156092	0.716693		0.296524	0.60622		0.0448329	0.859766		-0.0134106	0.94301		0.452616	0.302633		0.200925	0.68963		0.142681	0.704013		0.283963		29.5407	29.341	29.3557	29.4532	28.9814	29.3346	29.7047	29.7309	29.6915	29.4394	29.3662	29.5664	29.4629	29.3494	29.3848
GUCY1B3	Guanylate cyclase soluble subunit beta-1	Q02153;E9PCN2;B7Z426;Q02153-2;B7Z685;D6RC99	28.7948	28.9715	29.0736	29.0311	28.8803		0.176769	0.573923		0.278845	0.683633		0.236347	0.654771		0.0855687	0.851238		0.102076	0.620025		0.0595786	0.919326		-0.0911999	0.855069		0.656021		28.8593	28.8385	28.6865	29.0686	28.8112	29.0349	29.0914	29.003	29.1263	28.8504	28.9428	29.3001	28.9622	28.5426	29.1361
GUK1	Guanylate kinase	Q16774;B1ANH5;B1ANH0;Q16774-2;F5GXL9;B1ANG9;B1ANH6;B1ANH2;B1ANH1;B1ANH3	26.5432	26.8532	26.6077	26.5753	26.6364		0.309933	0.556249		0.0645199	0.928573		0.0320549	0.942303		0.093207	0.740663		-0.245413	0.590371		-0.277878	0.627925		-0.216726	0.573706		0.610216		26.6595	26.604	26.3662	26.5898	27.0608	26.9089	26.8741	26.4073	26.5419	26.604	26.4089	26.7129	26.6865	26.4969	26.726
GXYLT1	Glucoside xylosyltransferase 1	Q4G148-2;Q4G148	24.2077	23.8468	24.2129	24.2587	24.1564		-0.36084	0.456683		0.00525093	0.993334		0.0509707	0.853957		-0.0512416	0.936599		0.366091	0.277396		0.411811	0.494399		0.309599	0.602625		0.501735		24.1253	24.1332	24.3645	23.8385	23.7796	23.9225	24.0275	24.3578	24.2535	24.3578	24.1719	24.2463	23.7995	24.5926	24.0772
GYG1	Glycogenin-1	P46976;P46976-2;C9JQ42;P46976-3;G5E9W8;D3DNH0	27.4044	28.2251	28.2809	27.5921	28.1612		0.820698	0.484602		0.876516	0.706189		0.187731	0.793627		0.756809	0.436926		0.0558173	0.934167		-0.632968	0.535517		-0.0638892	0.879599		0.203279		26.9869	27.4938	27.7325	28.3951	27.8973	28.3828	28.3452	27.9923	28.5052	27.3745	27.5754	27.8264	28.1747	28.0965	28.2123
GYS1	Glycogen [starch] synthase, muscle	P13807-2;P13807;B7Z806	27.7808	27.7991	28.0438	27.8155	27.9488		0.0182959	0.959146		0.262967	0.524468		0.0346343	0.776014		0.16799	0.444623		0.244672	0.434497		0.0163383	0.970559		0.149694	0.625207		0.320515		27.7708	27.8264	27.7453	27.611	27.7833	28.003	28.0401	27.965	28.1263	27.8142	27.7581	27.8741	27.9428	27.8741	28.0296
HABP2	Hyaluronan-binding protein 2;Hyaluronan-binding protein 2 50 kDa heavy chain;Hyaluronan-binding protein 2 50 kDa heavy chain alternate form;Hyaluronan-binding protein 2 27 kDa light chain;Hyaluronan-binding protein 2 27 kDa light chain alternate form	F5H5M6;Q14520;B7Z8Q5	22.9292	23.4033	23.5505	24.1009	24.6998		0.474115	0.610121		0.621311	0.852028		1.17171	0.596584		1.77062	0.421835		0.147196	0.941588		0.697591	0.584311		1.29651	0.326649		0.341977		23.4676	22.9195	22.4005	23.4412	23.391	23.3778	22.2339	24.1642	24.2535	23.4558	24.6153	24.2317	24.1488	25.275	24.6757
HADH	Hydroxyacyl-coenzyme A dehydrogenase, mitochondrial	E9PF18;Q16836;Q16836-2	28.4866	28.4286	28.4923	28.3286	28.7096		-0.0580235	0.94502		0.00563049	0.994417		-0.158016	0.735985		0.222956	0.679606		0.0636539	0.928449		-0.0999921	0.909083		0.28098	0.70007		0.6931		28.3282	28.3578	28.7739	28.0401	28.8385	28.4073	28.3662	28.5754	28.5352	28.3704	28.2535	28.362	28.4433	29.0057	28.6798
HADHA	Trifunctional enzyme subunit alpha, mitochondrial;Long-chain enoyl-CoA hydratase;Long chain 3-hydroxyacyl-CoA dehydrogenase	P40939	27.9871	28.1892	28.2466	28.5909	28.7504		0.202109	0.747597		0.259565	0.806508		0.603846	0.57155		0.76333	0.418834		0.0574557	0.916241		0.401737	0.55882		0.561221	0.380676		0.204186		27.6527	28.258	28.0505	28.1937	28.4707	27.9031	28.3109	28.3325	28.0965	28.6527	28.509	28.611	28.8203	28.7989	28.632
HADHB	Trifunctional enzyme subunit beta, mitochondrial;3-ketoacyl-CoA thiolase	B4E2W0;P55084;F5GZQ3;B5MD38	28.082	28.0473	28.2924	28.3014	28.6494		-0.0347621	0.940757		0.210396	0.818703		0.219327	0.737065		0.567317	0.457543		0.245159	0.340557		0.254089	0.642915		0.602079	0.373232		0.322847		28.0505	27.8504	28.3452	27.9539	28.0914	28.0965	28.2847	28.1652	28.4274	28.6075	28.1556	28.141	28.6629	28.9316	28.3536
HAGH	Hydroxyacylglutathione hydrolase, mitochondrial	H3BPK3;Q16775-2;Q16775;H3BPQ4	27.5244	27.0866	27.2438	27.1335	27.3183		-0.43776	0.5785		-0.280542	0.792624		-0.390879	0.61516		-0.206026	0.668163		0.157218	0.727531		0.0468814	0.942529		0.231734	0.647885		0.478373		27.7708	27.1984	27.604	27.3992	27.0711	26.7895	27.141	27.3828	27.2077	27.2077	27.0813	27.1115	27.3066	27.4785	27.17
HARS	Histidine--tRNA ligase, cytoplasmic	D6REN6;P12081;B4DDD8;B4DY73;B3KWE1;B4E1C5;C9JWK3;E7ETE2	29.0188	28.9104	29.1606	29.1207	29.258		-0.108374	0.703842		0.141804	0.820882		0.101976	0.750112		0.239218	0.471985		0.250177	0.356723		0.21035	0.629781		0.347591	0.381927		0.326188		29.1263	28.9622	28.9677	28.9732	28.7389	29.019	29.1312	29.249	29.1015	29.019	29.0453	29.2979	29.141	29.4113	29.2216
HBA1	Hemoglobin subunit alpha	P69905	33.502	32.9777	32.6322	32.4841	32.1093		-0.524291	0.590194		-0.869761	0.680692		-1.01783	0.61299		-1.39261	0.404896		-0.34547	0.496248		-0.493542	0.582841		-0.868322	0.38293		0.190596		33.1115	33.9241	33.4702	33.3169	32.9746	32.6415	32.5273	32.5844	32.7849	32.7292	32.4895	32.2336	32.4678	32.1269	31.7333
HBB	Hemoglobin subunit beta;LVV-hemorphin-7;Spinorphin	P68871	34.2289	33.5678	33.4291	33.359	32.8634		-0.661128	0.585277		-0.799817	0.838239		-0.869906	0.594793		-1.36549	0.41794		-0.13869	0.885729		-0.208778	0.852895		-0.704366	0.46164		0.29306		33.7252	34.6996	34.2619	33.9505	33.6522	33.1006	33.4334	33.0495	33.8042	33.5527	33.4943	33.0299	33.2336	32.9712	32.3854
HBD	Hemoglobin subunit delta	P02042;E9PFT6;E9PEW8	27.2475	26.9332	26.423	26.6441	26.057		-0.314226	0.788698		-0.824492	0.846529		-0.60331	0.656902		-1.19044	0.44509		-0.510267	0.473634		-0.289084	0.802282		-0.876219	0.424442		0.302338		26.6181	27.7833	27.341	27.141	27.2891	26.3695	26.3762	26.3762	26.5165	26.9316	26.6181	26.3828	26.3427	26.1661	25.6622
HBS1L	HBS1-like protein	Q9Y450-4;Q9Y450;B7Z1K2;B7Z524;H0YDX7;H0YES5	25.0668	23.7349	25.3619	25.235	25.3043		-1.33188	0.547791		0.295074	0.826119		0.168194	0.79681		0.237531	0.567127		1.62696	0.385234		1.50008	0.572876		1.56941	0.436302		0.296433		24.8336	25.3477	25.019	23.0332	23.0822	25.0894	24.945	25.5225	25.6181	24.8858	25.4614	25.3578	25.3645	25.3205	25.228
HCLS1	Hematopoietic lineage cell-specific protein	P14317;E7EVW7	30.4757	30.5705	30.3678	30.585	30.6882		0.0947533	0.877387		-0.107906	0.904851		0.109292	0.886175		0.212451	0.740046		-0.202659	0.312309		0.0145391	0.979579		0.117698	0.762985		0.731094		30.4032	30.1483	30.8756	30.4919	30.5481	30.6714	30.2869	30.4234	30.393	30.6458	30.3088	30.8004	30.8004	30.4032	30.8608
HDAC6	Histone deacetylase 6	Q9UBN7;E7ERH6	27.9754	28.104	27.9007	28.0705	28.0328		0.128616	0.786428		-0.074681	0.930959		0.0951036	0.849887		0.0573845	0.894541		-0.203297	0.515754		-0.0335128	0.919822		-0.0712318	0.765159		0.786533		28.2979	27.8264	27.8019	28.249	28.0762	27.9869	27.8682	28.1015	27.7325	28.0965	27.9595	28.1556	28.0243	28.1312	27.9428
HDDC2	HD domain-containing protein 2	Q7Z4H3-3;Q7Z4H3-2;Q7Z4H3	23.3038	24.117	23.4968	23.2003	23.8488		0.813152	0.711904		0.192954	0.94568		-0.103479	0.960935		0.545014	0.730803		-0.620197	0.626377		-0.916631	0.618034		-0.268138	0.851357		0.665474		23.8764	22.1125	23.9225	25.0977	23.3665	23.8867	23.6564	23.7182	23.1157	23.0134	23.1577	23.4298	24.2879	23.5404	23.7182
HDGF	Hepatoma-derived growth factor	P51858;A8K8G0;Q5SZ08;Q5SZ07;B7Z525	25.57	25.4813	25.1627	23.4149	23.68		-0.0887438	0.968171		-0.407294	0.898097		-2.15507	0.610466		-1.88999	0.530452		-0.31855	0.530894		-2.06633	0.552163		-1.80125	0.399057		0.290819		27.0813	24.6703	24.9584	25.6403	25.275	25.5285	24.8093	25.4362	25.2426	22.7193	23.3089	24.2166	23.3483	22.7737	24.918
HDHD1	Pseudouridine-5-phosphatase	E9PAV8;E7EVH9;F5H6B0;Q08623-3;Q08623	25.1213	25.0539	24.2416	24.7258	24.4015		-0.0674553	0.825279		-0.879679	0.810997		-0.395475	0.648777		-0.719793	0.63053		-0.812224	0.487336		-0.32802	0.654205		-0.652337	0.662714		0.619201		25.317	25.0975	24.9495	25.1253	25.0691	24.9672	24.239	25.0691	23.4169	24.3511	24.7492	25.0772	23.3008	25.2607	24.6431
HDHD2	Haloacid dehalogenase-like hydrolase domain-containing protein 2	Q9H0R4;Q9H0R4-2	28.2699	27.9286	28.3795	28.3587	28.313		-0.341328	0.748305		0.109593	0.943755		0.0887998	0.935278		0.0431252	0.968313		0.450921	0.544884		0.430127	0.659332		0.384453	0.687608		0.793045		28.8712	27.8623	28.0762	28.362	27.4314	27.9923	28.4823	28.0557	28.6004	28.4113	28.1747	28.49	28.5499	28.5934	27.7958
HDHD3	Haloacid dehalogenase-like hydrolase domain-containing protein 3	Q9BSH5	23.5293	23.13	23.6662	22.5827	22.516		0	0		0	0		0	0		0	0		0	0		0	0		0	0		0.639455		24.1595	23.7891	22.6393	22.8199	23.4675	23.1026	25.4569	22.765	22.7766	22.4491	22.2582	23.0408	22.051	23.2405	22.2565
HDLBP	Vigilin	Q00341;E7EM71;H0Y394	26.3084	26.2683	26.2049	25.8221	25.9606		-0.0400753	0.959684		-0.103548	0.84456		-0.486257	0.578042		-0.347811	0.473138		-0.0634727	0.934431		-0.446182	0.586252		-0.307735	0.658584		0.390204		26.4057	26.3325	26.1871	26.4394	25.7945	26.5711	26.0711	26.3545	26.189	25.8504	25.792	25.824	25.8118	25.8623	26.2077
HEATR5A	HEAT repeat-containing protein 5A	F5H619;Q86XA9;Q86XA9-2;E9PB09;B5MC49;H7C5W6	26.3841	25.9476	26.1438	26.1355	26.1958		-0.436479	0.614981		-0.240295	0.848617		-0.248571	0.793999		-0.188294	0.833463		0.196184	0.502822		0.187908	0.822926		0.248185	0.720266		0.785112		26.8623	25.9271	26.3629	26.1757	25.8504	25.8166	26.0995	26.1075	26.2244	25.9473	26.5344	25.9248	26.1273	26.6458	25.8142
HEATR5B	HEAT repeat-containing protein 5B	Q9P2D3-3;Q9P2D3	25.4023	25.5228	25.6548	25.3963	25.4547		0.120435	0.717605		0.252467	0.826653		-0.00600306	0.989177		0.0523465	0.837963		0.132032	0.70803		-0.126438	0.84787		-0.0680885	0.85495		0.636386		25.3135	25.4862	25.4073	25.2961	25.6209	25.6513	25.6209	25.8361	25.5075	25.6181	25.1604	25.4105	25.2961	25.4583	25.6096
HEBP1	Heme-binding protein 1	Q9NRV9;F5GWX2	26.2571	25.9598	25.9986	26.0353	25.8994		-0.297268	0.627771		-0.258475	0.793573		-0.221848	0.711096		-0.357702	0.567324		0.0387929	0.953807		0.0754204	0.921867		-0.0604343	0.932526		0.733653		26.0629	26.2517	26.4567	26.2803	25.9316	25.6676	26.2317	25.797	25.9672	26.2408	25.7796	26.0854	26.0588	25.4984	26.141
HEBP2	Heme-binding protein 2	Q9Y5Z4;Q9Y5Z4-2	25.3713	25.6933	25.1216	25.8137	25.6792		0.32193	0.615229		-0.249748	0.937257		0.442353	0.611371		0.307897	0.511405		-0.571678	0.724495		0.120423	0.864221		-0.014033	0.977597		0.730624		25.4394	25.0935	25.5812	25.7208	25.9517	25.4073	25.9316	25.6264	23.8067	25.5926	25.965	25.8834	25.6971	25.6811	25.6595
HECTD3	E3 ubiquitin-protein ligase HECTD3	Q5T447;Q5T447-2	28.721	28.8449	29.013	28.8868	28.9019		0.123967	0.491752		0.292061	0.411177		0.165852	0.708549		0.180946	0.455138		0.168094	0.240173		0.0418847	0.924835		0.0569782	0.721409		0.406759		28.7802	28.7096	28.673	28.8916	28.7958	28.8474	29.0762	28.9841	28.9787	28.8081	28.7162	29.1361	28.8203	29.0084	28.877
HECTD4	Probable E3 ubiquitin-protein ligase HECTD4	F8VWT9;Q9Y4D8-4;Q9Y4D8;Q9Y4D8-2	25.3672	24.538	25.3389	25.4047	25.2169		-0.829169	0.614746		-0.0283184	0.982942		0.0375462	0.942702		-0.150287	0.713533		0.800851	0.560428		0.866715	0.64072		0.678882	0.618722		0.514622		25.3031	25.6458	25.1527	23.5248	24.7182	25.3712	24.9043	25.4394	25.673	25.3975	25.3679	25.4488	25.1253	25.1642	25.3612
HERC4	Probable E3 ubiquitin-protein ligase HERC4	Q5GLZ8-6;Q5GLZ8-3;Q5GLZ8-2;Q5GLZ8	27.3233	26.9804	27.0668	27.1902	27.1893		-0.342866	0.491456		-0.256463	0.808783		-0.133052	0.715018		-0.134007	0.594459		0.0864029	0.875009		0.209814	0.585786		0.208859	0.436954		0.530037		27.3494	27.189	27.4314	27.1015	26.9539	26.8858	27.1984	26.7129	27.2891	27.2625	27.019	27.2891	27.1115	27.3153	27.141
HEXA	Beta-hexosaminidase;Beta-hexosaminidase subunit alpha	H3BS10;H3BP20;P06865;E9PGL4;H3BU85;H3BTD4	24.7478	23.7378	25.3029	25.5321	25.2982		-1.01004	0.751694		0.555046	0.895615		0.784257	0.790089		0.550378	0.829881		1.56509	0.448631		1.7943	0.556057		1.56042	0.462844		0.564591		26.0711	22.8212	25.3511	23.2855	22.7295	25.1984	25.6784	24.6376	25.5926	25.1795	26.0894	25.3273	24.7796	25.6568	25.4583
HEXB	Beta-hexosaminidase subunit beta;Beta-hexosaminidase subunit beta chain B;Beta-hexosaminidase subunit beta chain A	P07686;Q5URX0;H0Y9B6;H0YA83	24.8481	25.43	25.3747	25.542	25.4301		0.581929	0.711305		0.526668	0.843967		0.693923	0.709097		0.581974	0.67789		-0.055261	0.896952		0.111994	0.856067		4.51406e-05	1		0.649356		23.8299	25.6784	25.0359	25.7208	25.2317	25.3376	25.4362	25.3135	25.3745	25.4831	25.4645	25.6784	25.5135	25.1253	25.6513
HGD	Homogentisate 1,2-dioxygenase	Q93099	26.1227	26.159	26.0777	26.409	26.2438		0.0362752	0.960281		-0.0449931	0.969535		0.286246	0.73545		0.121079	0.838022		-0.0812683	0.87684		0.249971	0.703391		0.0848039	0.828114		0.748103		25.8069	26.5359	26.0254	25.9825	26.391	26.1035	26.3477	25.9562	25.9293	26.5315	26.0914	26.604	26.217	26.0894	26.425
HGS	Hepatocyte growth factor-regulated tyrosine kinase substrate	O14964;E7EU53;O14964-2;I3L1E3	27.3136	27.1643	27.3678	27.2944	27.3806		-0.149328	0.663556		0.054184	0.939679		-0.0191962	0.968745		0.0669448	0.82224		0.203512	0.509977		0.130132	0.673236		0.216273	0.411281		0.661418		27.5165	27.2354	27.189	27.1312	27.2803	27.0813	27.2803	27.5969	27.2262	27.17	27.2979	27.4154	27.2714	27.4073	27.4629
HIBCH	3-hydroxyisobutyryl-CoA hydrolase, mitochondrial	Q6NVY1;Q6NVY1-2;B8ZZZ0	25.5619	25.3234	25.72	25.6299	26.0637		-0.238531	0.721671		0.158075	0.853982		0.0679709	0.890208		0.501802	0.504912		0.396606	0.566074		0.306502	0.760071		0.740334	0.44216		0.453259		25.433	25.6431	25.6096	25.1449	25.8019	25.0233	25.6595	25.4583	26.0422	25.8504	25.705	25.3342	25.9517	26.4953	25.7441
HIF1AN	Hypoxia-inducible factor 1-alpha inhibitor	Q9NWT6	23.964	23.7637	24.1226	23.7728	23.5018		-0.200345	0.949912		0.15855	0.966356		-0.191233	0.948742		-0.462215	0.82509		0.358894	0.872873		0.00911204	0.999391		-0.26187	0.907255		0.969497		22.6785	24.2821	24.9316	23.3539	22.773	25.1642	24.6875	23.8515	23.8288	22.6467	24.4923	24.1795	22.5666	23.7594	24.1795
HINT1	Histidine triad nucleotide-binding protein 1	P49773;D6REP8;D6RE99;D6RD60	29.6519	29.6762	29.5063	29.4137	29.6005		0.0243498	0.959831		-0.145553	0.813043		-0.238217	0.594257		-0.0514151	0.798023		-0.169903	0.659903		-0.262567	0.642111		-0.075765	0.862193		0.538896		29.6268	29.611	29.7178	29.8035	29.8549	29.3704	29.6198	29.4919	29.4073	29.4707	29.2957	29.4746	29.708	29.4649	29.6285
HINT2	Histidine triad nucleotide-binding protein 2, mitochondrial	Q9BX68	27.2713	27.1983	27.2004	27.6686	27.9729		-0.0730076	0.870851		-0.0708434	0.903227		0.397373	0.618042		0.701681	0.441975		0.0021642	0.996755		0.47038	0.556056		0.774689	0.295743		0.19822		27.0401	27.3745	27.3992	27.0401	27.4234	27.1312	27.0914	27.1604	27.3494	27.4314	27.9705	27.604	28.0243	28.1556	27.7389
HINT3	Histidine triad nucleotide-binding protein 3	Q9NQE9	25.6252	25.7822	25.5442	25.9055	25.7292		0.156945	0.737135		-0.0810356	0.928075		0.280285	0.651225		0.104024	0.819501		-0.237981	0.565613		0.12334	0.80267		-0.0529213	0.893135		0.592825		25.6181	25.8764	25.3811	25.6486	25.7024	25.9955	25.7895	25.2996	25.5433	25.7619	26.0711	25.8834	25.5195	25.7871	25.8811
HIST1H2BJ	Histone H2B;Histone H2B type 1-L;Histone H2B type 1-M;Histone H2B type 1-N;Histone H2B type 1-H;Histone H2B type 2-F;Histone H2B type 1-C/E/F/G/I;Histone H2B type 1-D;Histone H2B type F-S;Histone H2B type 1-K;Histone H2B type 3-B;Histone H2B type 2-E;Histone H2B type 1-B;Histone H2B type 1-O;Histone H2B type 1-J	B4DR52;Q99880;Q99879;Q99877;Q93079;Q5QNW6;P62807;P58876;P57053;O60814;Q5QNW6-2;Q8N257;Q16778;P33778;P23527;P06899	25.3116	23.8292	25.7561	25.7635	26.2591		-1.48246	0.728948		0.444419	0.939995		0.451888	0.901492		0.947467	0.75768		1.92688	0.487305		1.93435	0.616838		2.42992	0.454052		0.55868		26.4862	26.574	22.8748	23.1107	22.3965	25.9803	25.2354	25.9781	26.0547	25.5638	25.5955	26.1312	25.8191	26.8973	26.0608
HIST1H4A	Histone H4	P62805	23.1385	23.6791	23.5736	22.8801	22.8746		0.54059	0.736573		0.435012	0.870977		-0.258425	0.89832		-0.2639	0.871513		-0.105578	0.890429		0	0		0	0		0.637106		22.0283	23.2619	24.1253	23.7471	23.8005	23.4899	23.3005	23.3511	24.0691	23.0628	22.2704	23.3072	22.9601	22.3083	23.3555
HIST2H2AA3	Histone H2A type 2-C;Histone H2A type 2-A	Q16777;Q6FI13	27.4202	25.2661	26.1919	26.3806	26.3909		-2.15403	0.505861		-1.22822	0.612958		-1.03956	0.714276		-1.02923	0.55257		0.925814	0.513272		1.11447	0.583187		1.12481	0.571619		0.304591		27.3745	27.8564	27.0296	25.6012	24.1488	26.0484	26.4362	26.1681	25.9716	26.3612	26.5898	26.1908	25.9225	27.5165	25.7338
[truncated: 1,455 more rows]
