# Supplementary material
Source: publisher figshare collection journal article supplement (https://tandf.figshare.com/articles/dataset/_/6002054)
Supplement: Supplementary file 1 [file 2 › Salunkhe et al Table S4 Platelets N_5.xlsx]

## Sheet: Proteins in Clusters
Cluster 1	Cluster 2	Cluster 3	Cluster 4	Cluster 5	Cluster 6	Cluster 7	Cluster 8	Cluster 9
ABHD11	ABHD4	A1BG	A2M	ABLIM1	AAMDC	AARS	AASDHPPT	ACSS2
ABHD5	ACACA	ACTL6A	ABCF1	ACAA1	ACY1	ABCC4	ABCD3	ACTN4
ABRACL	ACADM	AIDA	ACAP2	ACTN1	ADCY6	ABCE1	ACAT1	ACTR10
ACADVL	ACO1	AK1	ACSBG1	ACTR1A	AGO2	ABHD10	ACOT7	AFTPH
ACAT2	ACOT8	AK2	ACSL1	ADH5	AGT	ABHD16A	ACP2	AHCYL2
ACLY	ACP1	AMDHD2	ACTA1	ADK	AKR1B1	ABLIM3	ACSL4	ALDH9A1
ACTG1	ACTBL2	ANKMY2	ACTB	ADRBK1	AKT2	ACADSB	ACTR3	ANK1
ACTR2	AIMP1	ANKRD28	ADPRH	AGPS	AKT3	ACO2	ACYP1	ANKFY1
ALAD	AK3	AP4M1	ADRM1	AHSA1	ANXA2	ACSL5	ADD1	AP3S1
ALDH16A1	ANP32B	APMAP	ADSL	AIFM1	ANXA6	ACSS1	ADD3	APOBR
ALDH4A1	ANXA7	APOA1BP	AGAP2	AKR1A1	AP1G1	ADAM10	ADO	ARAF
ANXA11	AP1G2	APOH	AGFG1	ALDOC	APEH	ADPGK	ADSS	ARFGAP3
ANXA4	ARHGDIA	ARHGEF7	AIMP2	ALOX12	ARFGAP1	AHCY	AFAP1	ARFGEF2
AP1B1	ARHGEF6	ARPC3	AKAP10	AMPD2	ARHGAP10	ALDOA	AGL	ARFRP1
AP1S1	ARL8B	ARRB2	AKT1	AP1M1	ARL1	ANO6	AHSG	ARHGAP18
AP2A2	ARPC1B	ATG5	AP2B1	AP3D1	ARL2	AP1S2	AKR7A2	ARHGAP35
APOC1	ARPC2	ATXN2L	AP2S1	AP3M1	ASPSCR1	ARCN1	ALDH1A1	ARHGDIB
APPL1	ASAP2	BAG6	AP4B1	APOA4	ATG16L1	ARHGEF1	ANKRD13A	ARMC1
ARF6	ASMTL	BLOC1S4	APOA2	ARF5	ATP1A1	ARRB1	ANKS1A	ARMC8
ARFGAP2	ATG4B	BRE	APOBEC3G	ARHGAP6	ATP5J	ASL	ANXA1	ARMT1
ARL6IP5	ATP5A1	C12orf10	APOE	ARPC5	ATP5S	ATL3	ANXA3	ASNA1
ATE1	ATP5C1	C14orf166	ARF4	ASRGL1	ATP6AP2	ATP2A2	AP3B1	ATG9A
ATOX1	B2M	CARD6	ARHGAP21	BAD	ATP6V1A	ATP2A3	APOA1	ATP2C1
ATP6V0D1	BAX	CCDC88A	ARHGAP4	BID	ATP6V1B2	ATP5B	APOB	ATP6V1F
BAG2	CALM1	CCNY	ARHGEF12	BIN2	ATP8A1	ATP5D	APOC2	ATXN10
BPNT1	CAMK1	CD2AP	ARHGEF2	BSG	ATPAF1	ATP5O	APP	BABAM1
C5orf51	CANX	CDC42	ARPC4	BTK	BCR	BANF1	APPL2	BRK1
CALU	CAPZA1	CDK2	ARPC5L	C15orf52	BIRC6	BCAP31	APRT	BZW1
CAPN2	CASS4	CHMP5	ASAH1	C1orf123	BLOC1S1	BLMH	ARAP1	C1orf50
CAPZA2	CBR1	CLIC4	ATG3	C1orf198	BOLA2	BRCC3	ARF3	CALCOCO1
CARKD	CD36	CLINT1	ATP6V1G1	C7orf25	BRAF	C10orf54	ARFGEF1	CALD1
CASP6	CDV3	CNST	BAG5	CA13	BSDC1	C19orf66	ARFIP1	CALR
CAST	CHCHD3	CPPED1	BANK1	CACYBP	C10orf11	C21orf33	ARHGAP1	CAMK2G
CCBL2	CHMP1A	CRKL	BNIP2	CAD	C11orf68	C2orf88	ARHGAP15	CARD16
CCT2	CIAPIN1	CSK	BTBD11	CCT4	C17orf59	CAPZB	ARL3	CASP7
CD109	CLTA	CUL1	BZW2	CCT6A	C17orf75	CCDC6	ARPC1A	CBL
CELF2	CLTC	CUTA	C20orf27	CD151	C1QBP	CD226	ATIC	CCND3
CFL2	CNP	CXCL3	C2CD5	CDK5RAP3	CAMK2D	CD9	ATP6V0A2	CD47
CHKB	CNPY3	DCTPP1	C4A;C4B	CEP170	CC2D1B	CDC42BPB	ATP6V1H	CD69
CLIP2	COG5	DDAH2	C4BPA	CFHR2	CCDC22	CHP1	BCAT1	CFB
CNDP2	COPB2	DNAJA2	C8A	CHMP2B	CCDC53	COG3	BCL2L1	CFHR1
COPS2	COPE	DNM2	C9orf64	CLIP1	CCDC93	COMT	BICD2	CHMP4A
COPZ1	COPS6	DOCK11	CA1	CLTB	CCS	COX6B1	BROX	CHMP4B
CRYZ	COPS7A	DRG2	CAP1	CMPK1	CCT5	CPT1A	C10orf76	CIRBP
CS	CORO1C	DTX3L	CAPN7	COPA	CD40LG	CSNK2A1	C11orf54	CLIC1
CSNK1A1	CRAT	DTYMK	CARM1	COPG2	CDC37	CSNK2B	C16orf62	CLU
CYFIP2	CRELD2	DYNC2H1	CCL5	CORO1B	CEP131	CYC1	C3	CNBP
DAAM1	CRK	DYNLL1	CD99	CPT2	CFH	DAZAP1	C3orf58	CNOT1
DCTN5	CRLF3	DYNLRB1	CDK5	CRTAP	CHMP3	DDOST	C4orf33	CNPY2
DDB1	CSRP1	ECM1	CDKN2D	CRYL1	CLASP2	DHRS7	C9orf89	COG1
DDX3X	CUL4B	EIF4G1	CHID1	CTSA	CLEC11A	DMTN	CAB39	COPG1
DENND3	CYB5R3	ENOSF1	CLASP1	CUL2	CLSTN1	DNAJC3	CAND1	COPS3
DERA	CYCS	ERLIN2	COASY	DBT	CNN2	DNPEP	CAPN1	COPS4
DNAJB2	DARS2	ERO1LB	COG2	DCD	COG4	DPP7	CAPNS1	COPS8
DNAJC8	DBN1	FAM195B	COMMD2	DDX1	COL6A3	EEF1G	CASP2	COTL1
DOCK8	DBNL	FGD3	COPS7B	DEF6	COLGALT1	EIF5A	CASP4	CSNK2A2
DUSP3	DCTD	FGD4	CORO7	DNAJC9	COMMD3	ELAVL1	CCDC91	CTDSPL
ECE1	DCTN1	FKBP5	CPNE3	DYNC1I2	CORO1A	EMC1	CCT3	CTGF
ECH1	DCTN4	FNTB	CPOX	DYNLL2	COX5A	EMD	CD84	CTSD
ECI2	DECR1	FYB	CTNND1	EEF1B2	COX5B	ENPP4	CDK16	DAB2
ENO1	DOK2	FYN	CTSC	EHBP1L1	CRBN	EPB41L3	CDK17	DAG1
ENO2	DPP3	G3BP1	CUL4A	EML2	CSDE1	EPS15L1	CHMP1B	DAK
FAM63A	ECHS1	GAK	DCAF7	EML4	CTTN	ERLEC1	CHMP2A	DAPP1
FAM91A1	EHD1	GAPVD1	DENND2C	EPB41	CUL5	ESYT1	CHORDC1	DCTN6
FERMT3	EHD3	GART	DENND4A	ETFB	CXCL12	ETHE1	CLEC16A	DCUN1D1
FGG	EIF2A	GSK3B	DENR	F13A1	CXCL5	FABP5	CLEC1B	DDX19A
FHOD1	EMC8	GSR	DGKA	FAM175B	CYB5R1	FAM107B	CMIP	DHRS4
FN1	ENDOD1	GTDC1	DNAJA1	FGB	DDX19B	FAM126A	CNOT10	DHX29
GDI2	ENSA	GYG1	DNAJC6	FHL3	DENND4C	FH	COMMD5	DIABLO
GK	ESAM	HADH	DNM3	GBE1	DGKH	FKBP15	COMMD9	DLGAP4
GLB1	ESYT2	HAGH	DPP9	GCLM	DGKZ	FKBP2	COPS5	DMD
GNAQ	ETFA	HDDC2	DPYD	GDI1	DLST	FLOT2	COX7A2	DNAJB1
GNAZ	EXOC3L2	HNRNPA3	DTNBP1	GIT1	DNAJB11	G6B	CP	DPYSL2
GNB2	F11R	HNRNPD	DYNC1LI1	GOLGA4	DNAJC7	G6PD	CPNE1	DSCR3
GNB5	FAM120A	HSPA13	ECM29	GPX7	ECHDC1	GABARAPL2	CRYZL1	DUSP22
GPI	FERMT2	HYOU1	EEF1A1	GRB2	EEA1	GLA	CST3	DUSP23
GRHPR	FHL1	IDI1	EEF1D	HDAC6	EFHD2	GLIPR2	CTPS1	EHBP1
GUK1	FLNA	IGLC2	EEF2	HGD	EHHADH	GMPR2	CTPS2	EHD4
HARS	GALT	ILK	EFNB1	HINT3	EIF2B2	GNPAT	CTSW	EIF1AX
HEATR5A	GLUD1	ITGAV	EFTUD1	HLA-A	EIF3A	GNPNAT1	CYFIP1	EIF2B4
HGS	GNA13	ITGB5	EIF2B1	HRG	EIF3F	GP1BB	CYLD	EIF2S3
HIBCH	GNAI2	ITIH4	EIF2B5	HSD17B4	EIF5B	GPSM3	CYTH2	EIF4B
HLA-B	GNAS	ITPA	EIF3C	HSPA4	EIF6	GPX1	DARS	EPN1
HNRNPH1	GNB1	KARS	EIF3E	HSPH1	EMC2	GPX4	DCP1A	EPS15
HP	GP9	KPNA6	EIF3H	IMMT	ERAP1	GSPT1	DCTN2	EXOC3
HSP90AB1	GRIPAP1	LCP2	EIF3J	INPP5B	EXOC6B	HADHB	DCXR	EXOC3L4
HSP90B1	GSS	LDHB	EIF3M	IQGAP2	FAM177A1	HINT1	DDT	EXOC4
HSPA1A	GSTK1	LRPPRC	EIF4A2	IRAK4	FAM63B	HINT2	DGKG	EXOC8
HSPA8	GSTP1	MAP1A	EIF4G2	ITGA2B	FAM98A	HLA-E	DNAJC10	FAM136A
IDH2	HADHA	MAPK14	EIF5	ITGA5	FBXL8	HNRNPK	DOCK10	FAM65C
IGHA1	HCLS1	MAT2B	ELMO1	KLC1	FNIP2	HSD17B12	DOCK5	FAM89B
IMPA1	HLA-C	MINK1	ELP5	LAMTOR2	FNTA	HSPD1	DST	FCGR2A
IRF3	HN1L	MOB1A	EMILIN1	LDHA	FXR1	HSPE1	DYM	FKBP1A
IST1	HNRNPL	MPL	EOGT	LGALS1	G3BP2	INPP1	DYNC1H1	FRY
KALRN	HOOK3	MRI1	EVI5L	LIMD1	GALM	ITGA2	DYRK1A	FYCO1
LAMTOR1	HS1BP3	MSN	EXOC6	LMAN2	GAPDH	ITGB1	EEF1E1	GBF1
LAMTOR3	HSD17B10	MT-CO2	F5	LRRFIP1	GBAS	ITPR1	EFEMP1	GBP4
LCP1	HSPA5	MYCT1	FAH	LSM4	GCC1	LAMP1	EGF	GGA3
LMAN1	HSPA9	MYH14	FAM114A2	LSM6	GCLC	LIMS1	EIF1	GGCT
LRCH3	HTRA2	MYL6B	FAM160B2	LTBP1	GFOD1	LRRC59	EIF2AK2	GMDS
LRRC16A	IFT27	NCK1	FAM3C	LYPLAL1	GFPT1	LSM2	EIF2B3	GMFB
LRRC57	IGHM	NEDD8	FAM65B	LYZ	GID8	LY6G6F	EIF2S1	GMPPB
LTF	IGJ	NID1	FARSA	MANF	GK2	MDH1	EIF3D	GMPR
MAP1S	IGKC	NSF	FARSB	MAOB	GLS	MRVI1	EIF3K	GNB4
MGLL	ITGB3	NUDC	FBXO7	MAP2K2	GLTP	MYDGF	EIF4A1	GNPDA1
MPP1	ITIH1	OGDH	FCER1G	MAPRE1	GNG11	MYL12A	EIF4E	GRB10
MSRA	JAM3	OPHN1	FER	MCU	GNS	NAA50	EIF4H	GRK6
MTMR12	LACTB	OSBPL8	FGFR1OP2	METTL7A	GOLPH3L	NARS	EML3	GSN
MYLK	LAMTOR5	OSTF1	FKBP4	MIF4GD	GSTT2	NDOR1	EPHX2	GSTM5
NANS	LANCL2	P2RX1	FLAD1	MTSS1L	GSTZ1	NDUFA7	ERAP2	GSTO1
NAP1L4	LAT	PAFAH1B2	FLII	MTURN	HABP2	NDUFS6	ERBB2IP	GSTT1
NBEAL2	LCMT1	PANX1	FLNB	MYH9	HBS1L	NDUFV1	ERC1	HBB
NCKAP1L	LIMD2	PDGFD	FN3K	NACA	HDHD2	NFX1	ETF1	HBD
NCKIPSD	LPP	PDHA1	FN3KRP	NAMPT	HEBP1	NPEPL1	EXOC2	HEBP2
NDUFA5	LRRFIP2	PDPK1	FRYL	NAPG	HIST1H4A	OSBP	EXOC5	HERC4
NQO2	LYN	PGD	FTH1	NDUFB10	HNRNPH3	OXCT1	EXOC7	HIF1AN
NRBF2	LZIC	PGP	GALK1	NDUFS4	HSP90AB2P	PACSIN2	EZR	HNRNPA2B1
NT5C3A	M6PR	PIK3R6	GAMT	NEDD8-MDP1	HSPA6	PARK7	F12	HPS4
OSBPL2	MAT2A	PIP4K2B	GAS2L1	NUDT16L1	HSPB1	PBDC1	F8A1	IMPDH2
OXR1	MDH2	PKHD1L1	GBA2	NUDT3	HYI	PCYT2	FADD	IPO7
PAPSS2	ME2	PLXNA4	GC	NUMB	IGF2BP2	PDHB	FAF1	KIF5B
PDIA6	MEMO1	PLXNB3	GCA	OCRL	IGHG4	PDLIM5	FAM160B1	KPNA3
PHB	MFF	PMPCA	GCN1L1	OLA1	IQGAP1	PGM2L1	FAM213B	LASP1
PIP4K2A	MLEC	PPP1R3E	GGA1	OTUB1	ITCH	PIN1	FAM49B	LBP
PKM	MPRIP	PRAF2	GIT2	P4HB	ITIH2	PLXNB2	FBLN1	LDLRAP1
PLEKHO2	MPST	PRPSAP1	GLOD4	PA2G4	IVD	PPIB	FDPS	LRCH1
PLS3	MVP	PSMB7	GLRX	PARVB	KCMF1	PPIF	FES	MAGED2
PMVK	MYD88	PSMG1	GLRX3	PDCD2L	KIAA0196	PPP1CA	FHL2	MAP4
PNMA1	MYL1	RAB8A	GNB2L1	PEA15	KIAA1033	PPP1R12A	FIS1	MAPK1
PPM1A	MYL9	RABL3	GOLGA2	PHB2	KIF2A	PRRC1	FKBP3	MAPKAPK2
PPP1R7	MYO18A	RABL6	GOPC	PPA2	KRAS	PSMC4	FNBP1L	ME1
PPP3CB	NADSYN1	RAC1	GOT1	PPAT	KSR1	PTGS1	FOCAD	MICU2
PRDX3	NAPA	RALA	GP5	PPIH	LAMC1	PTPN6	FSCN1	MOB4
PRKCA	NAT1	RAP1GAP2	GPS1	PPP1R3D	LHFPL2	RAB11B	FSTL1	MPI
PRPS1	NDUFA4	RAP1GDS1	GUCY1A3	PPP1R9B	LOXL3	RAB11FIP3	FUCA1	MTMR6
PRPS2	NDUFA8	RENBP	HBA1	PPP2CA	LRRC9	RAB14	FUT8	MTSS1
PRTFDC1	NDUFS3	REPS2	HDGF	PRDX4	MAP2K4	RAB18	GALK2	MYH10
PSMA1	NDUFV2	RHOF	HDLBP	PRDX6	MAP3K5	RAB27B	GALNT2	MYL6
PSMA3	NENF	RPE	HECTD4	PSMB10	MAVS	RAB30	GANAB	NAGA
PSMA5	NEXN	RSU1	HIST2H2AB	PSMC2	MBP	RAB32	GARS	NAPRT
PSMA6	NME1	RUVBL2	HPS1	PSMD12	MGMT	RANBP1	GET4	NDUFA6
PSMD10	NNT	RWDD4	HTATIP2	PSTPIP2	MOV10	RAP2B	GGPS1	NDUFA9
PSMD4	NPEPPS	SDHB	IAH1	PTK2B	MTDH	RASGRP2	GLO1	NME1
PTBP1	OSBPL3	SEC16A	IDE	PTPN7	MTFR1L	RDH11	GLUL	NOMO1
PTP4A2	PAFAH1B1	SEPP1	IFI35	PTPRC	MTOR	RGS6	GMIP	NRAS
PTPRA	PAICS	SEPT2	IGBP1	PURA	MTX2	RPN1	GMPS	NUDT9
PTPRJ	PDIA4	SERPING1	IGFALS	PYGB	MYCBP	SACM1L	GNL1	OPA1
PTTG1IP	PDLIM1	SFN	IKBKAP	QIL1	MYCBP2	SAR1B	GOLGA3	OPTN
RAB1A	PEAR1	SGTA	IKBKB	RAB33A	MYL4	SCRN3	GOLGB1	OXSR1
RAB1B	PEBP1	SH3GLB1	INF2	RAB5A	MYO1G	SEC22B	GP1BA	PARP9
RAB6B	PECAM1	SHPK	INPP5D	RAB7A	NAA15	SLC25A3	GPD1L	PDCD10
RABEP2	PGAM1	SIRT2	KIAA0513	RAB8B	NCOA7	SLC27A4	GPD2	PDCD5
RABGEF1	PGK1	SKAP2	KIAA1211	RAN	NDUFA12	SNAPIN	GRAP2	PDCD6IP
RABGGTA	PGM2	SLC3A2	KIAA1468	RBM38	NDUFS1	SNX29	GSDMD	PDGFA
RARS	PITPNB	SLC44A1	KIF13B	REXO2	NECAP2	SPCS3	GSK3A	PDIA5
RELA	PKM	SMAP1	KTN1	RGCC	NHLRC2	STAT3	GTPBP1	PEF1
RGS10	PPID	SNX5	L3HYPDH	ROCK1	NLRP13	STIM1	GTPBP2	PEPD
RPLP2	PPIE	SPG20	LACTB2	ROCK2	NME7	STK4	GUCY1B3	PFN1
RTN4	PPIL3	STAM2	LAMA4	SAMD14	NPLOC4	STOM	GYS1	PGM1
RUFY1	PPP2R2A	STK10	LARP1	SARG	NT5C	STRAP	HEATR5B	PHKB
SEC13	PPP5C	STX12	LGALS3BP	SCAMP3	NT5C2	STRIP1	HECTD3	PITHD1
SEC31A	PRKAB1	SUMF1	LIMA1	SDHA	NUCB2	STXBP2	HEXA	PLCB2
SERPINB6	PRKAR1A	SUSD1	LIN7C	SEPT6	NUDT16	SURF4	HIST1H2BJ	PLCG2
SFXN1	PRKCSH	TAOK3	LOH12CR1	SERGEF	OVCA2	SYNE2	HK1	PNP
SHMT2	PSMA7	TARS	LRRC40	SH3BGRL2	PAAF1	SYTL4	HMGCL	PPP1CC
SKP1	PSMB2	TBC1D9B	LYPLA1	SH3BGRL3	PAFAH1B3	TBL1X	HNRNPA1	PPP1R14B
SLC9A3R1	PSMB4	TIA1	LYPLA2	SH3PXD2B	PAK2	TBXAS1	HPRT1	PPP2R5A
SLC9A9	PSMB8	TIMP3	LYST	SKIV2L	PARVG	TIMM13	HPSE	PPP3R1
SLFN14	PSMD14	TMA7	MACF1	SLAIN2	PCMT1	TJP2	HPX	PPP6R1
SNX3	PSMF1	TMED8	MAN1A1	SNX27	PDAP1	TM9SF2	HUWE1	PRKAG1
SNX30	PTPN11	TRAF6	MAN2A1	SNX6	PDE12	TMED10	IARS	PRMT1
SOD2	RAB2A	TSSC1	MAP2K6	SPTBN1	PDE5A	TMX1	IGHG1	PROSER2
SORD	RAB5C	TUBB3	MAPKAPK3	SRM	PDIA3	TREML1	IL18	PSME2
SPR	RAD23B	TUBGCP3	MFN2	SSFA2	PDXDC1	TSPAN33	INPP5K	PTEN
STK24	RASA3	UBE2Z	MICAL1	SSH3	PFDN2	TWF2	IPO9	PTPN18
STX7	RDH13	UBQLN1	MIF	STAT1	PFKM	UBA3	IRAK1	PVALB
TAB1	RHOG	UFD1L	MLX	STAT5B	PHGDH	UBA7	IRGQ	RAB2B
TAGLN2	RNF214	USP5	MMRN1	STK26	PHKG2	VAMP8	ISOC1	RAB6A
TBC1D24	RNH1	VAT1	MMS19	STRN3	PI4KA	VAPA	ITM2B	RABGGTB
TCEB1	RPN2	VDAC2	MROH1	STXBP1	PIK3R1	VDAC1	ITSN2	RAP1B
TKT	SCRN1	VEGFC	MSRB3	STXBP3	PITPNA	WBP2	JAK3	RBM3
TOM1L2	SDPR	VPS26B	MYO1C	SUCLG1	PLEKHF2	YARS	KANK2	RPA3
TPM1	SELP	WASH1	MYO9B	SYNJ1	PPIP5K2	YES1	KNG1	RPIA
TRIO	SEPT11	YWHAZ	MZT2A	TAP1	PPP1R12C		KPNA1	RPS17
TTC9C	SEPT2		NBAS	TBC1D10B	PPP1R21		KPNA4	RPS6KA1
TXN	SLC2A3		NCKAP1	TBK1	PPP6R2		KPNB1	S100A4
TYMP	SLMAP		NEK9	TGFB1I1	PRDX5		LANCL1	SAMD9
UBA1	SMARCD1		NGLY1	TNFAIP8L2	PRKAA1		LARS	SCFD2
UBE2D3	SNAP23		NID2	TPD52L2	PTGES2		LDAH	SCYL2
UBE2O	SPCS2		NIF3L1	TSPAN9	PTGR1		LRCH4	SERBP1
UBXN6	SPTAN1		NIT1	TST	PTMS		LRRC32	SERPINB9
UFM1	SQSTM1		NME3	TTLL12	PTRHD1		LRRC47	SHC1
UROD	SSBP1		NMT1	TUBA1C	RAB39A		LSM3	SPAG9
VAPB	STK38		NPC2	UBA6	RAB4B		LSS	ST13
VCP	STRN		NRD1	UBE2Q1	RAB5B		LTA4H	STIP1
VCPIP1	STRN4		NRGN	USP7	RABEP1		MADD	SUMF2
VPS35	STX11		NUBP2	VAC14	RABGAP1L		MAN2C1	SZRD1
WDR26	STX4		NUCB1	VIM	RBCK1		MAP2K1	TAOK1
WDR44	SUCLA2		NUDT2	VPS33B	RBX1		MAP2K3	TARDBP
WIPF1	SUGT1		NUTF2	VPS4B	REPS1		MAP4K2	TBC1D22A
YWHAH	SYK		OAS3	VTI1B	RGL2		MARS	TBC1D23
	TANGO2		OSGEP	WASF3	RILP		MCTS1	TBCD
	TAPBP		OTULIN	WDR11	RILPL2		METAP1	TMED2
	TBCA		PABPC1	WNK1	RIPK1		METAP2	TNFAIP8
	TBCB		PACS1	YOD1	RMDN1		MICALL2	TNPO1
	TBXA2R		PACS2	YWHAQ	RPS6KB1		MMP1	TNPO2
	TESC		PANK4	ZC3HAV1	RQCD1		MOB2	TNS1
	TMOD3		PCBP2	ZFPL1	RRAGA		MOB3C	TPP2
	TMSB10		PCNP	ZYX	SAV1		MON2	TRAPPC11
	TMSB4X		PCSK6		SCAMP2		MRPL12	TRAPPC9
	TPD52		PDCD6		SCCPDH		MTHFR	TRIM21
	TPM2		PDDC1		SEC14L5		MTM1	TRIM40
	TPM3		PDGFB		SELENOF		MTMR14	TRIOBP
	TPM4		PF4		SEMA4D		MTMR2	TSC22D4
	TPP1		PF4V1		SEPT5		NAA25	TTR
	TRIM25		PFAS		SERPINC1		NCK2	UBE4B
	TRIM58		PFDN4		SERPINF1		NEDD4	UCHL5
	TRIP6		PHKA2		SH3BGRL		NMI	UGP2
	TSC22D1		PICALM		SIRT5		NT5DC1	USP47
	TSPAN14		PIK3CB		SMTN		NUDCD2	VPS16
	TUBB6		PIK3CG		SNAP29		ORM1	VTN
	TWF1		PLAA		SNCA		OTUD6B	WARS
	TXNL1		PLCB4		SPTA1		PCBP1	WIBG
	UACA		PLOD3		ST6GAL1		PDCL3	ZFYVE1
	UBA5		PLXDC2		STOML2		PDE3A	ZNF185
	UBE2I		PNPO		STON1		PDGFC	ZNF598
	UBL4A		PPCS		TAB2		PELO
	UBP1		PPFIA1		TBC1D15		PFDN1
	UBXN1		PPM1B		TBC1D17		PFDN5
	UQCRC1		PPM1F		TBCEL		PFDN6
	UQCRC2		PPP1R2		TEC		PGLS
	VASP		PPP3CA		TFG		PGLYRP2
	VDAC3		PREP		TGFBI		PHPT1
	VPS28		PRKAR1B		TLDC1		PIP4K2C
	VPS4A		PRKD2		TMEM263		PIP5K1C
	YWHAE		PRKG1		TMEM40		PITPNC1
			PRRC2A		TMEM63A		PKN1
			PRUNE		TOMM34		PLBD2
			PSMB9		TOMM70A		PLCB3
			PSMC1		TRAPPC4		PLEKHO1
			PSMC3		TRAPPC6B		PLG
			PSMC5		TRIP4		PLOD1
			PSMD1		TRNT1		PNKD
			PSMD11		TSG101		POFUT1
			PSMD13		TSN		POGLUT1
			PSMD2		TSNAX		PPBP
			PSMD3		TTC39B		PPIA
			PSMD5		TTC7B		PPME1
			PSMD8		TUBA8		PPP2R4
			PSME4		TXNDC5		PPP2R5D
			PTPN23		UBAP1		PPP6R3
			PURB		UBE2K		PRDX2
			QARS		UBE2V2		PRKACB
			QDPR		ULK3		PRMT9
			RABGAP1		USP14		PROSC
			RALGAPB		UTRN		PRPSAP2
			RAP1A		VPS33A		PSAP
			RHEB		VPS39		PSMB3
			RIC8A		VPS53		PSMB5
			RIPK2		WDR37		PSMB6
			RIT1		ZFAND1		PSMC6
			RNASEL		ZPR1		PSMD7
			RNF213		ZW10		PSMD9
			RNF7				PTK2
			RNPEP				PTMA
			RPLP0				PTPN1
			RPLP1				PTPN12
			RPS21				RAB10
			RPS6KA3				RAB37
			RRAGC				RAB3GAP1
			RRAS				RAB3GAP2
			RTCA				RAC2
			RUVBL1				RALBP1
			SBDS				RARRES2
			SCYL1				RBPMS2
			SDF2L1				RDX
			SEC23IP				RICTOR
			SEC24A				RIN3
			SEC24C				RNASET2
			SEC24D				RNF31
			SERPINA3				RPS12
			SERPINB1				RPSA
			SERPINE1				RRBP1
			SERPINE2				S100A6
			SMAD1				S100A8
			SMYD3				S100A9
			SNX1				SARS
			SNX12				SCARF1
			SNX9				SCFD1
			SORT1				SCP2
			SPECC1				SEC24B
			SPHK1				SEPT9
			SPTB				SESTD1
			SRGN				SH3GLB2
			ST3GAL6				SH3PXD2A
			STAT6				SHMT1
			STK39				SHOC2
			STUB1				SLA2
			SYNCRIP				SLK
			TACC1				SMAD2
			TALDO1				SMAP2
			TBCE				SMS
			TC2N				SNTB1
			TF				SNX4
			TFPI				SPARC
			TGFB1				SRI
			THBS1				SSR4
			TIMM8A				STK3
			TIMP1				STRIP2
			TNFSF12				STX16
			TOLLIP				STXBP5
			TPMT				SULT1A1
			TRADD				SYAP1
			TRAFD1				SYNE1
			TRAPPC13				TACC3
			TRAPPC5				TBC1D5
			TRIP11				TDRP
			TSC22D3				TFCP2
			TSTD1				TIPRL
			TTC1				TLN1
			TUBA1B				TLN2
			TUBA4A				TMSB15A
			TUBB4B				TNIK
			TUBGCP2				TNPO3
			TXNDC12				TOR1A
			UAP1L1				TOR2A
			UBAP2L				TOR4A
			UBE2F				TP53I3
			UBE2G2				TP53RK
			UBE2H				TPI1
			UBE2L3				TPT1
			UBE2M				TRAPPC1
			UBR4				TRAPPC8
			UFL1				TRIP13
			UGDH				TROVE2
			UNC13D				TSTA3
			UNC45A				TTC27
			UPF1				TTC38
			USP24				TTYH3
			USP8				TUBA1A
			VARS				TUBB
			VAV3				TUBB1
			VIPAS39				TUBG1
			VPS11				TXNDC17
			VPS13A				TXNDC9
			VPS37B				UBE2N
			VPS41				UBE3C
			VPS45				UBE4A
			VPS52				UCHL3
			VTA1				UFC1
			WASF1				UMPS
			WDR77				UROS
			XPNPEP1				USO1
			XPOT				USP15
			XYLT2				USP9X
			YWHAB				VAV1
			ZC3HAV1L				VBP1
			ZMPSTE24				VPS13C
							VPS18
							VPS36
							VPS37A
							VPS51
							VWA5A
							WDR13
							WDR61
							XIRP2
							XPO1
							XPO4
							XPO7
							YWHAG
							ZZEF1

## Sheet: GO Terms in Clusters
Cluster 1						Cluster 6
#pathway ID	pathway description	Protein Nr.	FDR			#pathway ID	pathway description	Protein Nr.	FDR
GO.0016192	vesicle-mediated transport	39	6.2e-09			GO.0015031	protein transport	47	3e-09
GO.0002757	immune response-activating signal transduction	21	3.92e-07			GO.0045184	establishment of protein localization	49	3e-09
GO.0006950	response to stress	65	1.32e-06			GO.0008104	protein localization	53	9.29e-08
GO.0044248	cellular catabolic process	39	1.32e-06			GO.0033036	macromolecule localization	58	2.47e-07
GO.0002429	immune response-activating cell surface receptor signaling pathway	17	1.64e-06			GO.0071702	organic substance transport	55	2.9e-07
GO.0050790	regulation of catalytic activity	49	2.11e-06			GO.0046907	intracellular transport	44	4.11e-07
GO.0002478	antigen processing and presentation of exogenous peptide antigen	13	3.84e-06			GO.0051649	establishment of localization in cell	52	4.77e-07
GO.0009056	catabolic process	42	4.58e-06			GO.0006810	transport	75	1.31e-05
GO.0048583	regulation of response to stimulus	61	8.68e-06			GO.0051641	cellular localization	54	2.32e-05
GO.0050778	positive regulation of immune response	22	8.85e-06			GO.1902582	single-organism intracellular transport	37	2.32e-05
GO.0033554	cellular response to stress	39	1.15e-05			GO.0055114	oxidation-reduction process	32	0.000268
GO.0044403	symbiosis, encompassing mutualism through parasitism	26	1.31e-05			GO.0006091	generation of precursor metabolites and energy	19	0.000494
GO.0044281	small molecule metabolic process	45	2.72e-05			GO.0016192	vesicle-mediated transport	34	0.000528
GO.0016032	viral process	24	2.94e-05			GO.0006163	purine nucleotide metabolic process	16	0.00168
GO.0043085	positive regulation of catalytic activity	35	2.98e-05			GO.0051179	localization	80	0.00186
Cluster 2						Cluster 7
#pathway ID	pathway description	Protein Nr.	FDR			#pathway ID	pathway description	Protein Nr.	FDR
GO.0007599	hemostasis	32	7.16e-11			GO.0055114	oxidation-reduction process	31	1.9e-06
GO.0007596	blood coagulation	31	1.26e-10			GO.0061024	membrane organization	28	4.41e-06
GO.0030168	platelet activation	21	7.24e-10			GO.0044281	small molecule metabolic process	45	5.46e-06
GO.0042060	wound healing	32	6.13e-09			GO.0046907	intracellular transport	34	5.46e-06
GO.0009611	response to wounding	32	6.56e-08			GO.1902582	single-organism intracellular transport	31	9.16e-06
GO.0044281	small molecule metabolic process	55	4.08e-07			GO.0050896	response to stimulus	90	3.63e-05
GO.0008104	protein localization	47	8.24e-07			GO.0051649	establishment of localization in cell	38	3.63e-05
GO.0045184	establishment of protein localization	40	1.39e-06			GO.0051641	cellular localization	42	4.63e-05
GO.1902582	single-organism intracellular transport	37	1.39e-06			GO.0045333	cellular respiration	12	5.92e-05
GO.0033036	macromolecule localization	51	3.12e-06			GO.0006091	generation of precursor metabolites and energy	17	7.9e-05
GO.0051641	cellular localization	52	3.14e-06			GO.0044802	single-organism membrane organization	22	9.18e-05
GO.0006091	generation of precursor metabolites and energy	21	3.41e-06			GO.0045184	establishment of protein localization	31	9.18e-05
GO.0016192	vesicle-mediated transport	36	3.68e-06			GO.0006886	intracellular protein transport	22	0.000133
GO.1902578	single-organism localization	65	4.8e-06			GO.0007596	blood coagulation	19	0.000133
GO.0055114	oxidation-reduction process	33	4.83e-06			GO.0034613	cellular protein localization	28	0.000133
Cluster 3						Cluster 8
#pathway ID	pathway description	Protein Nr.	FDR			#pathway ID	pathway description	Protein Nr.	FDR
GO.0007169	transmembrane receptor protein tyrosine kinase signaling pathway	25	1.14e-05			GO.0009056	catabolic process	77	1.27e-11
GO.0007167	enzyme linked receptor protein signaling pathway	28	1.27e-05			GO.0016192	vesicle-mediated transport	60	1.27e-11
GO.0007264	small GTPase mediated signal transduction	24	1.27e-05			GO.1901575	organic substance catabolic process	67	4.97e-10
GO.0035556	intracellular signal transduction	40	2.28e-05			GO.0051649	establishment of localization in cell	72	1.22e-09
GO.0030168	platelet activation	14	4.93e-05			GO.0044248	cellular catabolic process	63	3.04e-09
GO.0007596	blood coagulation	20	5.74e-05			GO.0044710	single-organism metabolic process	123	7.68e-09
GO.0006796	phosphate-containing compound metabolic process	38	6.15e-05			GO.0051641	cellular localization	78	9.09e-09
GO.0050878	regulation of body fluid levels	22	7.77e-05			GO.1902578	single-organism localization	99	9.09e-09
GO.0006793	phosphorus metabolic process	37	0.000241			GO.0006810	transport	106	1.57e-08
GO.0010811	positive regulation of cell-substrate adhesion	9	0.000241			GO.0044765	single-organism transport	94	1.87e-08
GO.0051246	regulation of protein metabolic process	44	0.000241			GO.0006793	phosphorus metabolic process	70	3.4e-08
GO.0032268	regulation of cellular protein metabolic process	42	0.000253			GO.0006796	phosphate-containing compound metabolic process	68	7.58e-08
GO.0055086	nucleobase-containing small molecule metabolic process	18	0.000264			GO.0019538	protein metabolic process	115	7.58e-08
GO.0042060	wound healing	21	0.000265			GO.0044281	small molecule metabolic process	76	8.35e-08
GO.0050790	regulation of catalytic activity	41	0.00027			GO.0051234	establishment of localization	105	1.42e-07
Cluster 4						Cluster 9
#pathway ID	pathway description	Protein Nr.	FDR			#pathway ID	pathway description	Protein Nr.	FDR
GO.0019538	protein metabolic process	138	1.12e-17			GO.0016192	vesicle-mediated transport	46	8.89e-12
GO.0044267	cellular protein metabolic process	122	3.06e-16			GO.0051649	establishment of localization in cell	51	2.34e-08
GO.0016192	vesicle-mediated transport	62	9.53e-14			GO.0051641	cellular localization	55	1.04e-07
GO.0051246	regulation of protein metabolic process	92	2.24e-12			GO.0045184	establishment of protein localization	41	3.15e-07
GO.0045087	innate immune response	52	1.44e-11			GO.0015031	protein transport	39	5.01e-07
GO.0050790	regulation of catalytic activity	84	3.47e-11			GO.0051234	establishment of localization	71	3.11e-06
GO.0008152	metabolic process	214	3.85e-10			GO.0008104	protein localization	44	7.82e-06
GO.0032268	regulation of cellular protein metabolic process	83	3.85e-10			GO.0044765	single-organism transport	61	7.82e-06
GO.0065009	regulation of molecular function	92	4.09e-10			GO.0006810	transport	68	8.9e-06
GO.0043085	positive regulation of catalytic activity	62	5.71e-10			GO.0045807	positive regulation of endocytosis	11	1.56e-05
GO.0002682	regulation of immune system process	60	5.95e-10			GO.0033036	macromolecule localization	48	0.00002
GO.0051649	establishment of localization in cell	70	5.95e-10			GO.1902578	single-organism localization	62	0.00002
GO.0006950	response to stress	106	1.19e-09			GO.0051246	regulation of protein metabolic process	53	3.29e-05
GO.0030162	regulation of proteolysis	42	3.84e-09			GO.0071702	organic substance transport	45	3.53e-05
GO.0044093	positive regulation of molecular function	66	6.89e-09			GO.0046907	intracellular transport	36	3.73e-05
Cluster 5
#pathway ID	pathway description	Protein Nr.	FDR
GO.0051128	regulation of cellular component organization	51	2.65e-06
GO.0051493	regulation of cytoskeleton organization	20	8e-06
GO.0015031	protein transport	34	3.34e-05
GO.0016192	vesicle-mediated transport	33	3.34e-05
GO.0044087	regulation of cellular component biogenesis	24	3.34e-05
GO.0016032	viral process	25	4.55e-05
GO.0043254	regulation of protein complex assembly	16	5.54e-05
GO.0033043	regulation of organelle organization	31	5.92e-05
GO.0051649	establishment of localization in cell	40	0.000108
GO.0019882	antigen processing and presentation	13	0.000137
GO.0006810	transport	60	0.000213
GO.1902582	single-organism intracellular transport	30	0.00024
GO.0044281	small molecule metabolic process	44	0.000264
GO.0019884	antigen processing and presentation of exogenous antigen	11	0.000387
GO.0051179	localization	69	0.000387
